# Supplementary material
Source: PubMed Central journal article supplement (PMC3728379)

## Glucosamine and Glucosamine-6-phosphate Derivatives: Catalytic Cofactor

### Analogs for the *glmS* Ribozyme

Jeffrey J. Posakony\* and Adrian R. Ferré-D'Amaré\*

National Heart, Lung, and Blood Institute  
50 South Drive, MSC 8012  
Bethesda, Maryland 20892-8012, United States of America

### Supporting Information

**General Experimental Details.** Unless otherwise noted, flash chromatography was performed using a Biotage Isolera™ system and Silicycle Siliasep™ HP silica cartridges. TLC plates were visualized by dipping in a solution of 4-methoxybenzaldehyde, sulfuric acid and ethanol (1:1:10) and subsequently heating. Anion exchange chromatography was performed on TSKgel DEAE-5PW on an analytical size (7.5 mm ID x 7.5cm L, 10 μm) at 1 mL/min or a preparative size (21.5 mm ID x 15 Cm, 13μm) at 6 mL/min using ÄKTA Purifier 10. Semipreparative reversed phase HPLC was carried out using a Supelco Discovery C18 (10 mm i.d. x 25cm; 5 μm, 180 Å) or an Agilent ZORBAX Eclipse XDB C18 (9.4 mm i.d. x 25cm; 5 μm, 80 Å) columns at 3.5 and 4 mL/min, respectively. For compounds with weak or no chromophores, semi-preparative HPLC and anion exchange chromatography eluate fractions were monitored with a combination of UV<sub>220</sub> and MS analyses. HPLC and HRMS analyses were performed by ESI-TOF. NMR experiments were performed at the following frequencies: <sup>1</sup>H 500 MHz or 600

MHz;  $^{13}\text{C}$  125 MHz or 150 MHz; COSY 600 MHz; HMBC and HMQC ( $^1\text{H}$  at 600 MHz,  $^{13}\text{C}$  at 150 MHz).

## Table of Contents for Characterization Data

Each compound's characterization data includes  $^1\text{H}$ ,  $^{13}\text{C}$ , and COSY NMR, and MS/HRMS unless otherwise indicated. Additional characterization information is shown in parentheses.

|                                                         |       |
|---------------------------------------------------------|-------|
| <b>20<math>\alpha</math></b> (HPLC; no COSY data) ..... | S-4   |
| <b>20<math>\beta</math></b> (HPLC) .....                | S-12  |
| <b>20<math>\beta</math>-mesylate</b> .....              | S-21  |
| <b>21</b> .....                                         | S-30  |
| <b>22</b> .....                                         | S-39  |
| <b>23</b> .....                                         | S-52  |
| <b>23-mesylate</b> (HPLC) .....                         | S-60  |
| <b>24</b> (HPLC).....                                   | S-69  |
| <b>25</b> .....                                         | S-77  |
| <b>26</b> .....                                         | S-85  |
| <b>27a</b> (HPLC).....                                  | S-94  |
| <b>27b</b> (HPLC) .....                                 | S-107 |
| <b>28a</b> .....                                        | S-119 |
| <b>28b</b> (HPLC) .....                                 | S-128 |
| <b>28c</b> .....                                        | S-138 |
| <b>29a</b> (HPLC).....                                  | S-147 |
| <b>29b</b> (HPLC) .....                                 | S-157 |
| <b>30a</b> (HPLC).....                                  | S-166 |
| <b>30b</b> .....                                        | S-175 |
| <b>31</b> .....                                         | S-184 |
| <b>33</b> .....                                         | S-190 |
| <b>34</b> .....                                         | S-198 |
| <b>35</b> (HMBC, HMQC NMR).....                         | S-206 |
| <b>36</b> .....                                         | S-216 |
| <b>37</b> .....                                         | S-223 |



|                                                                   |       |
|-------------------------------------------------------------------|-------|
| <b>38</b> .....                                                   | S-232 |
| <b>39</b> (no COSY data).....                                     | S-238 |
| <b>40</b> (no COSY data).....                                     | S-248 |
| <b>41</b> .....                                                   | S-260 |
| <b>42</b> .....                                                   | S-271 |
| <b>43</b> .....                                                   | S-280 |
| <b>47</b> .....                                                   | S-289 |
| <b>48</b> .....                                                   | S-300 |
| <b>49</b> (analysis of NMR spectra and proposed structures) ..... | S-316 |
| <b>25-6-phosphate preparation (no <sup>13</sup>C data)</b> .....  | S-327 |

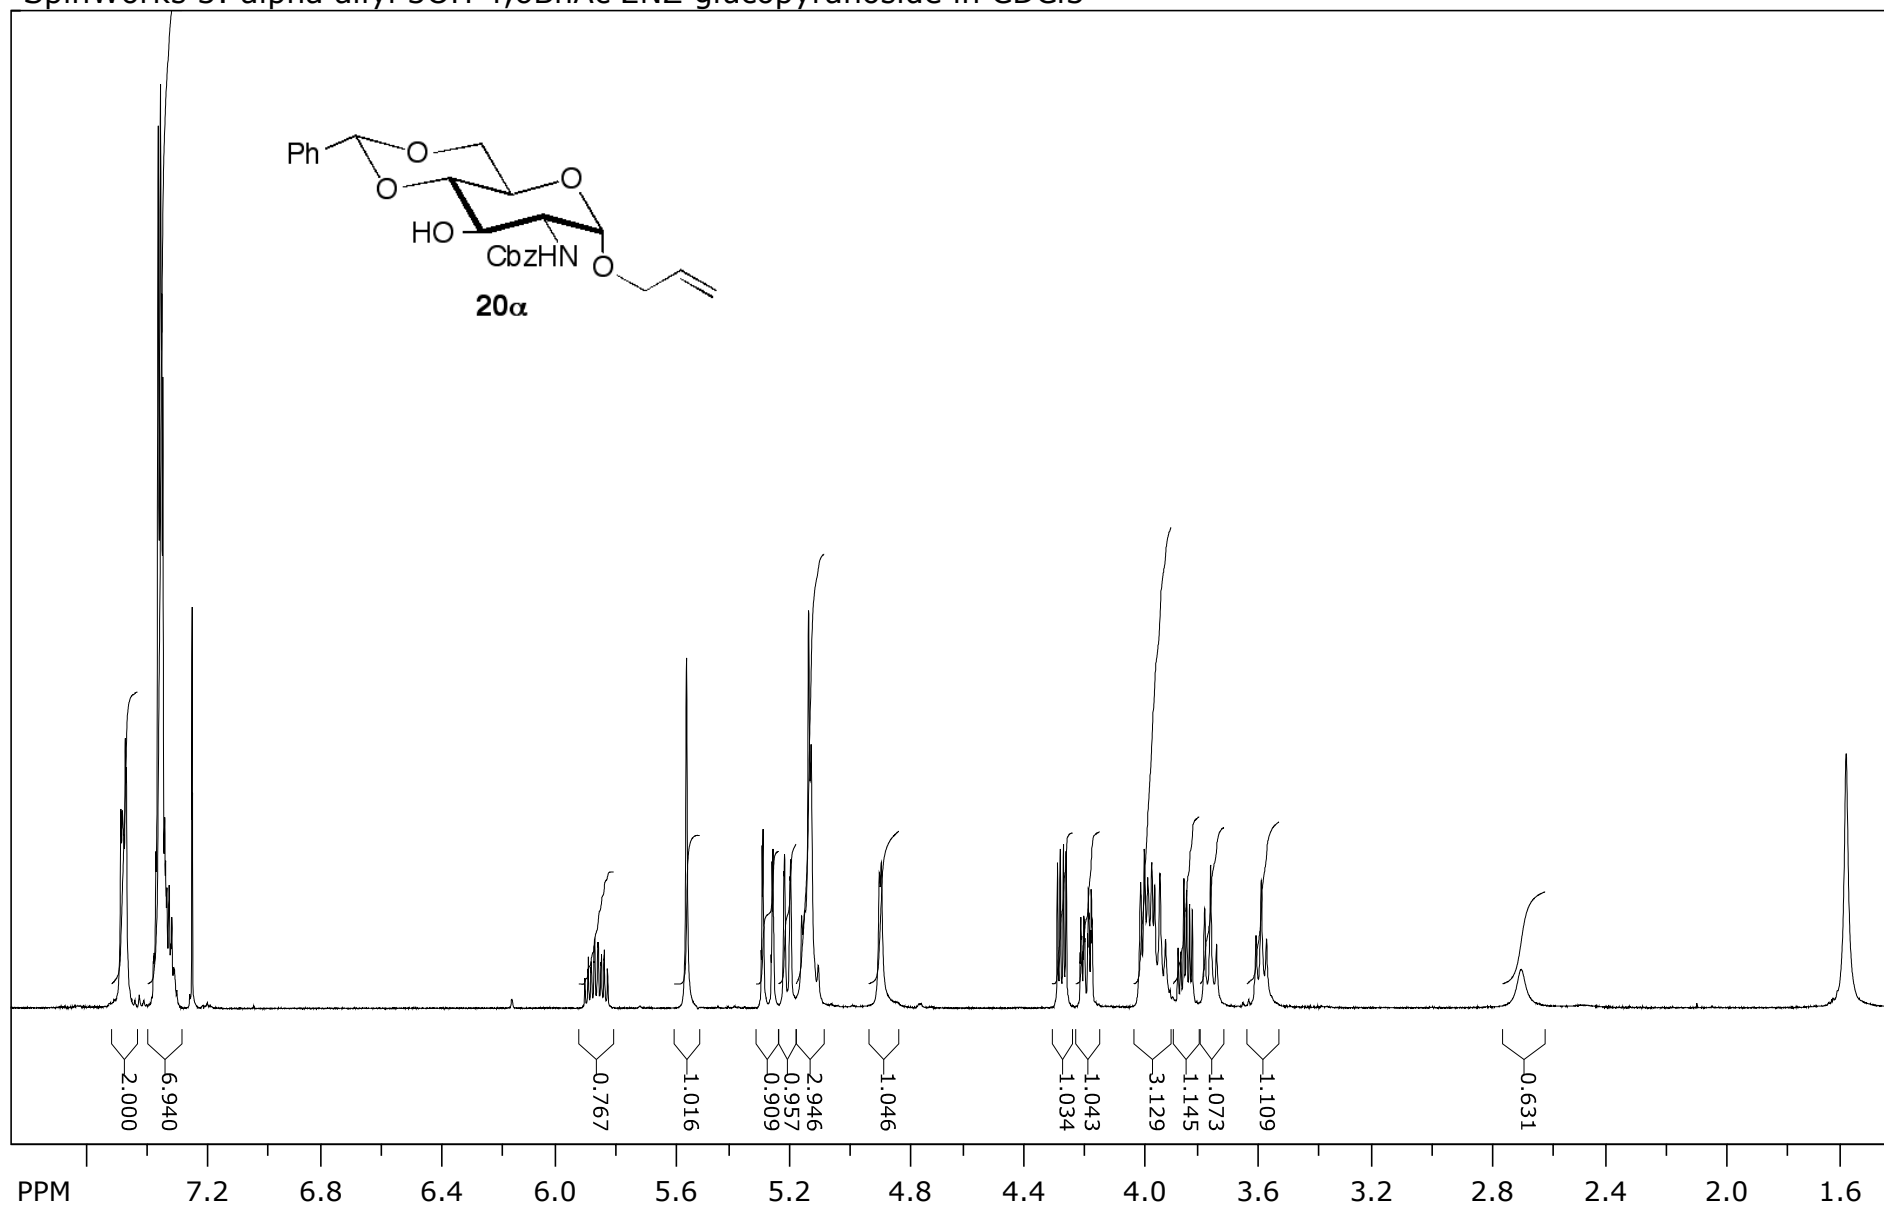

file: ...h alpha 3OH BnAc 1H in CDCl3\1\fid expt: <zg>  
transmitter freq.: 499.852499 MHz  
time domain size: 32768 points  
width: 5000.00 Hz = 10.0030 ppm = 0.152588 Hz/pt  
number of scans: 64

freq. of 0 ppm: 499.850012 MHz  
processed size: 16384 complex points  
LB: 0.000 GF: 0.0000  
Hz/cm: 129.334 ppm/cm: 0.25874

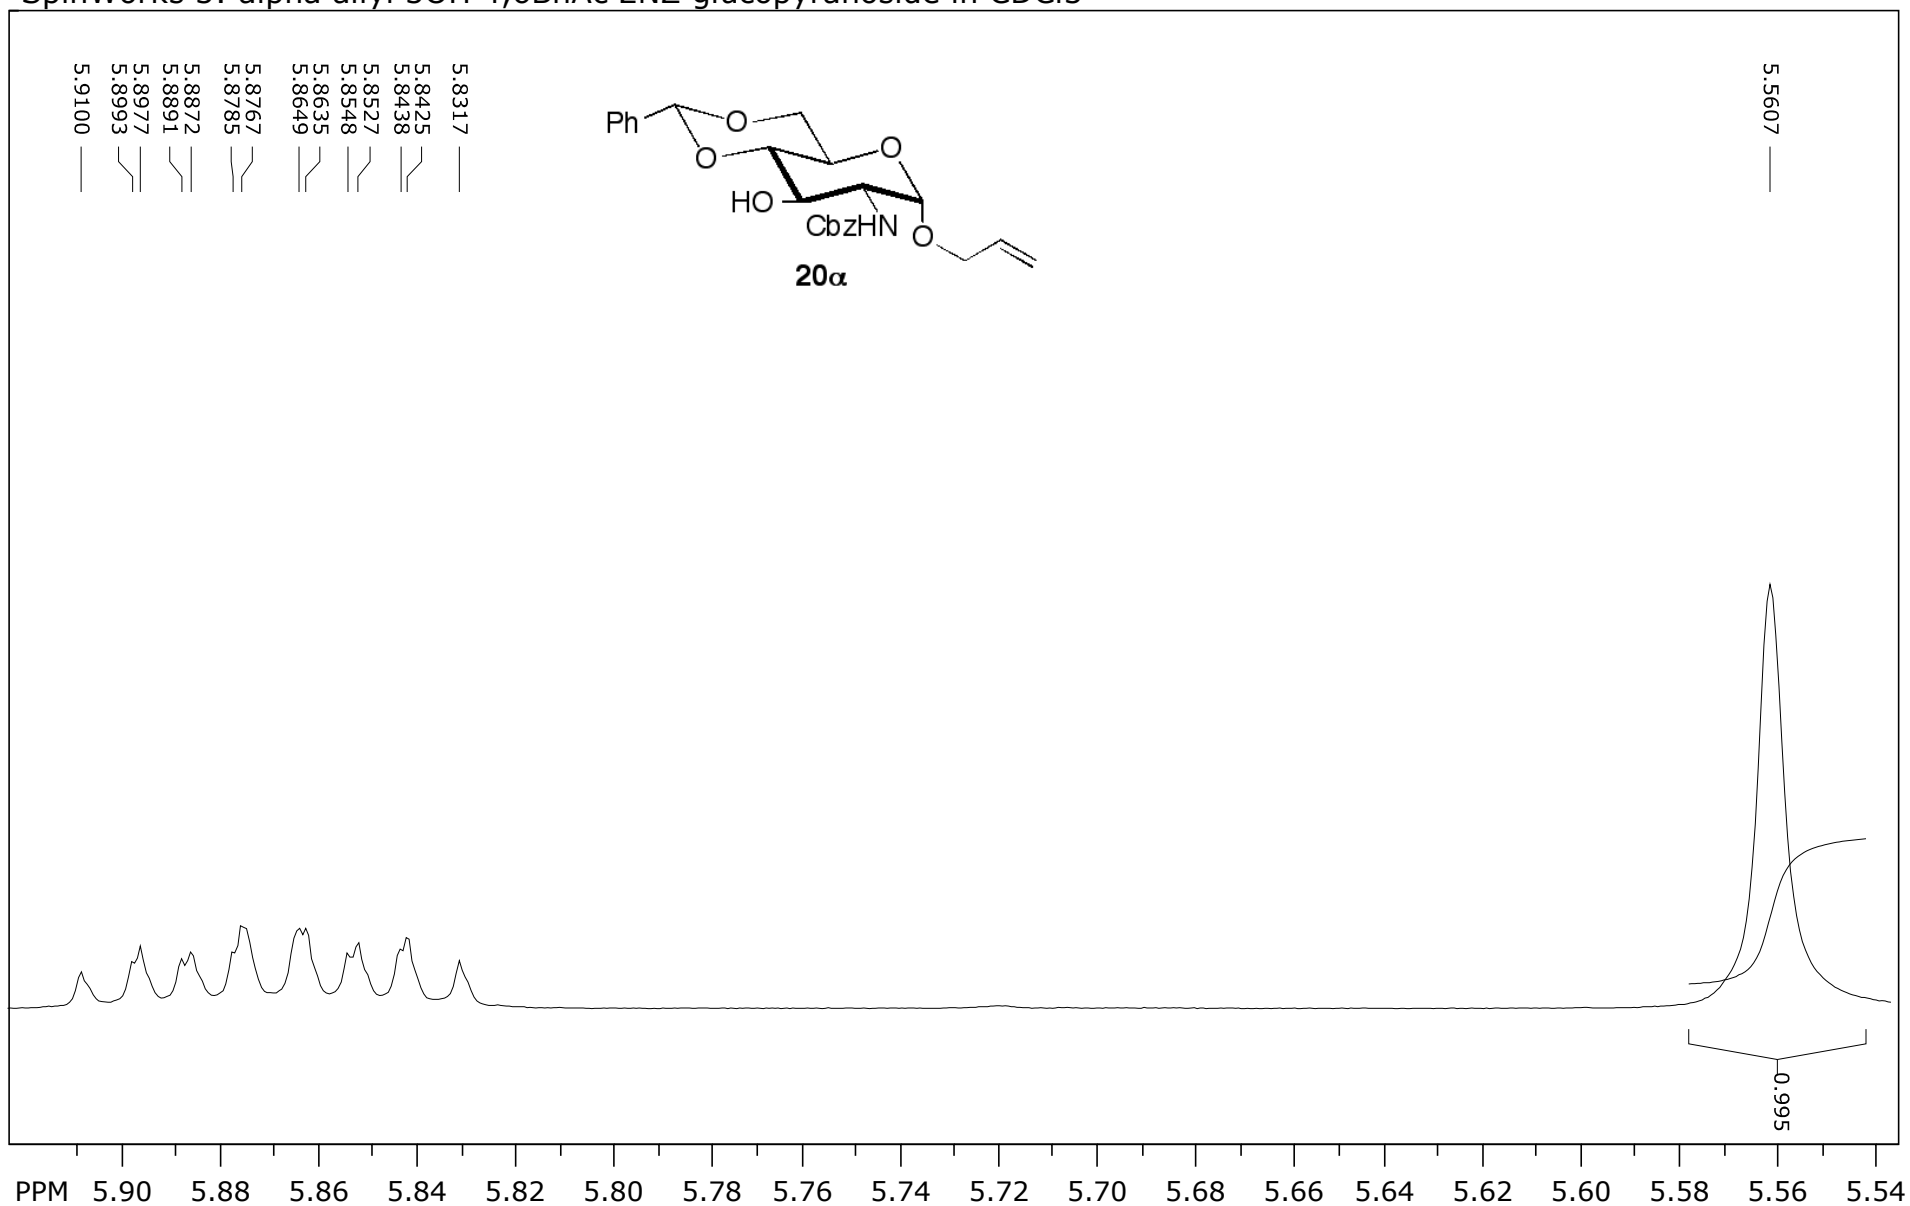

file: ...h alpha 3OH BnAc 1H in CDCl3\1\fid expt: <zg>  
transmitter freq.: 499.852499 MHz  
time domain size: 32768 points  
width: 5000.00 Hz = 10.0030 ppm = 0.152588 Hz/pt  
number of scans: 64

freq. of 0 ppm: 499.850012 MHz  
processed size: 16384 complex points  
LB: 0.000 GF: 0.0000  
Hz/cm: 7.783 ppm/cm: 0.01557

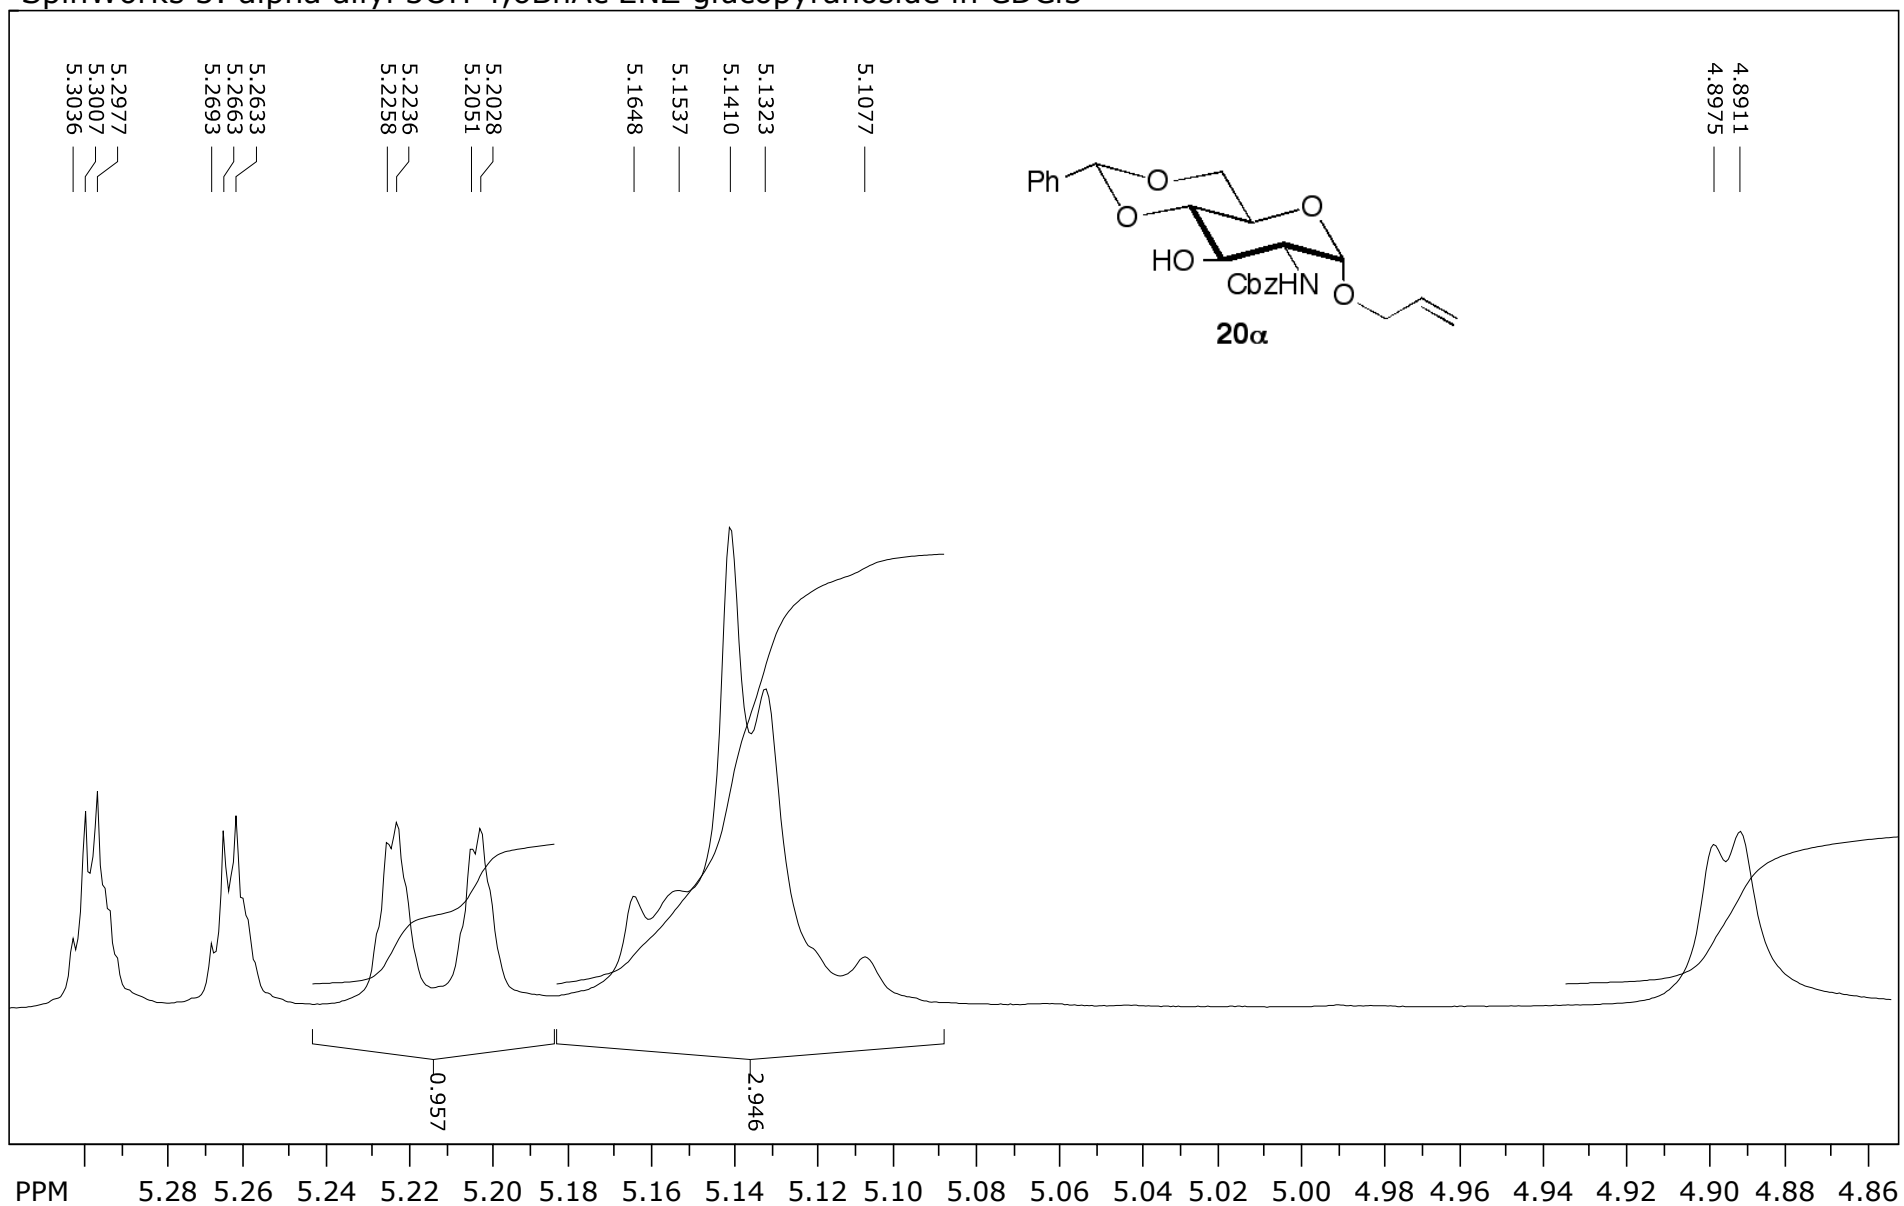

file: ...h alpha 3OH BnAc 1H in CDCl3\1\fid expt: <zg>  
transmitter freq.: 499.852499 MHz  
time domain size: 32768 points  
width: 5000.00 Hz = 10.0030 ppm = 0.152588 Hz/pt  
number of scans: 64

freq. of 0 ppm: 499.850012 MHz  
processed size: 16384 complex points  
LB: 0.000 GF: 0.0000  
Hz/cm: 9.314 ppm/cm: 0.01863

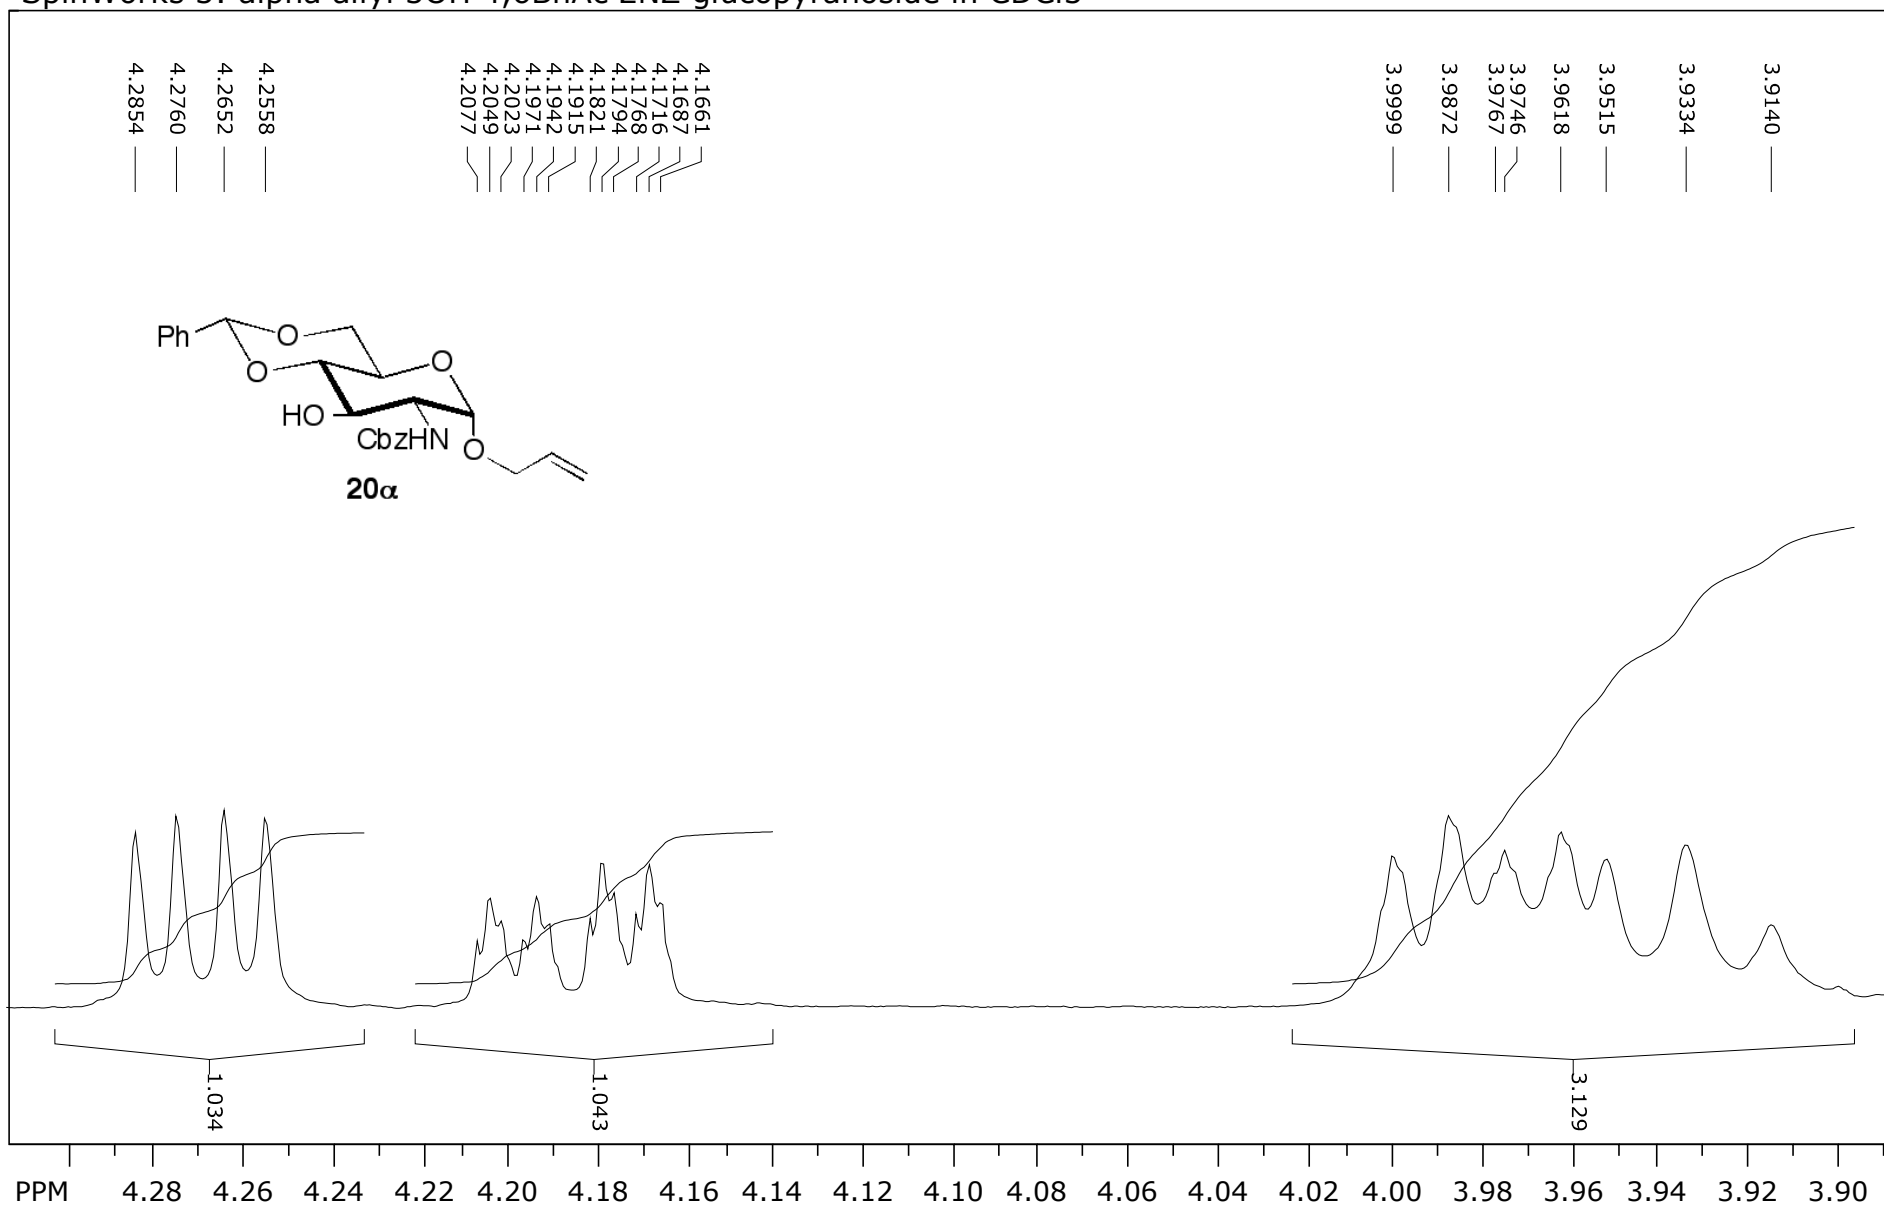

file: ...h alpha 3OH BnAc 1H in CDCl3\1\fid expt: <zg>  
 transmitter freq.: 499.852499 MHz  
 time domain size: 32768 points  
 width: 5000.00 Hz = 10.0030 ppm = 0.152588 Hz/pt  
 number of scans: 64

freq. of 0 ppm: 499.850012 MHz  
 processed size: 16384 complex points  
 LB: 0.000 GF: 0.0000  
 Hz/cm: 8.541 ppm/cm: 0.01709

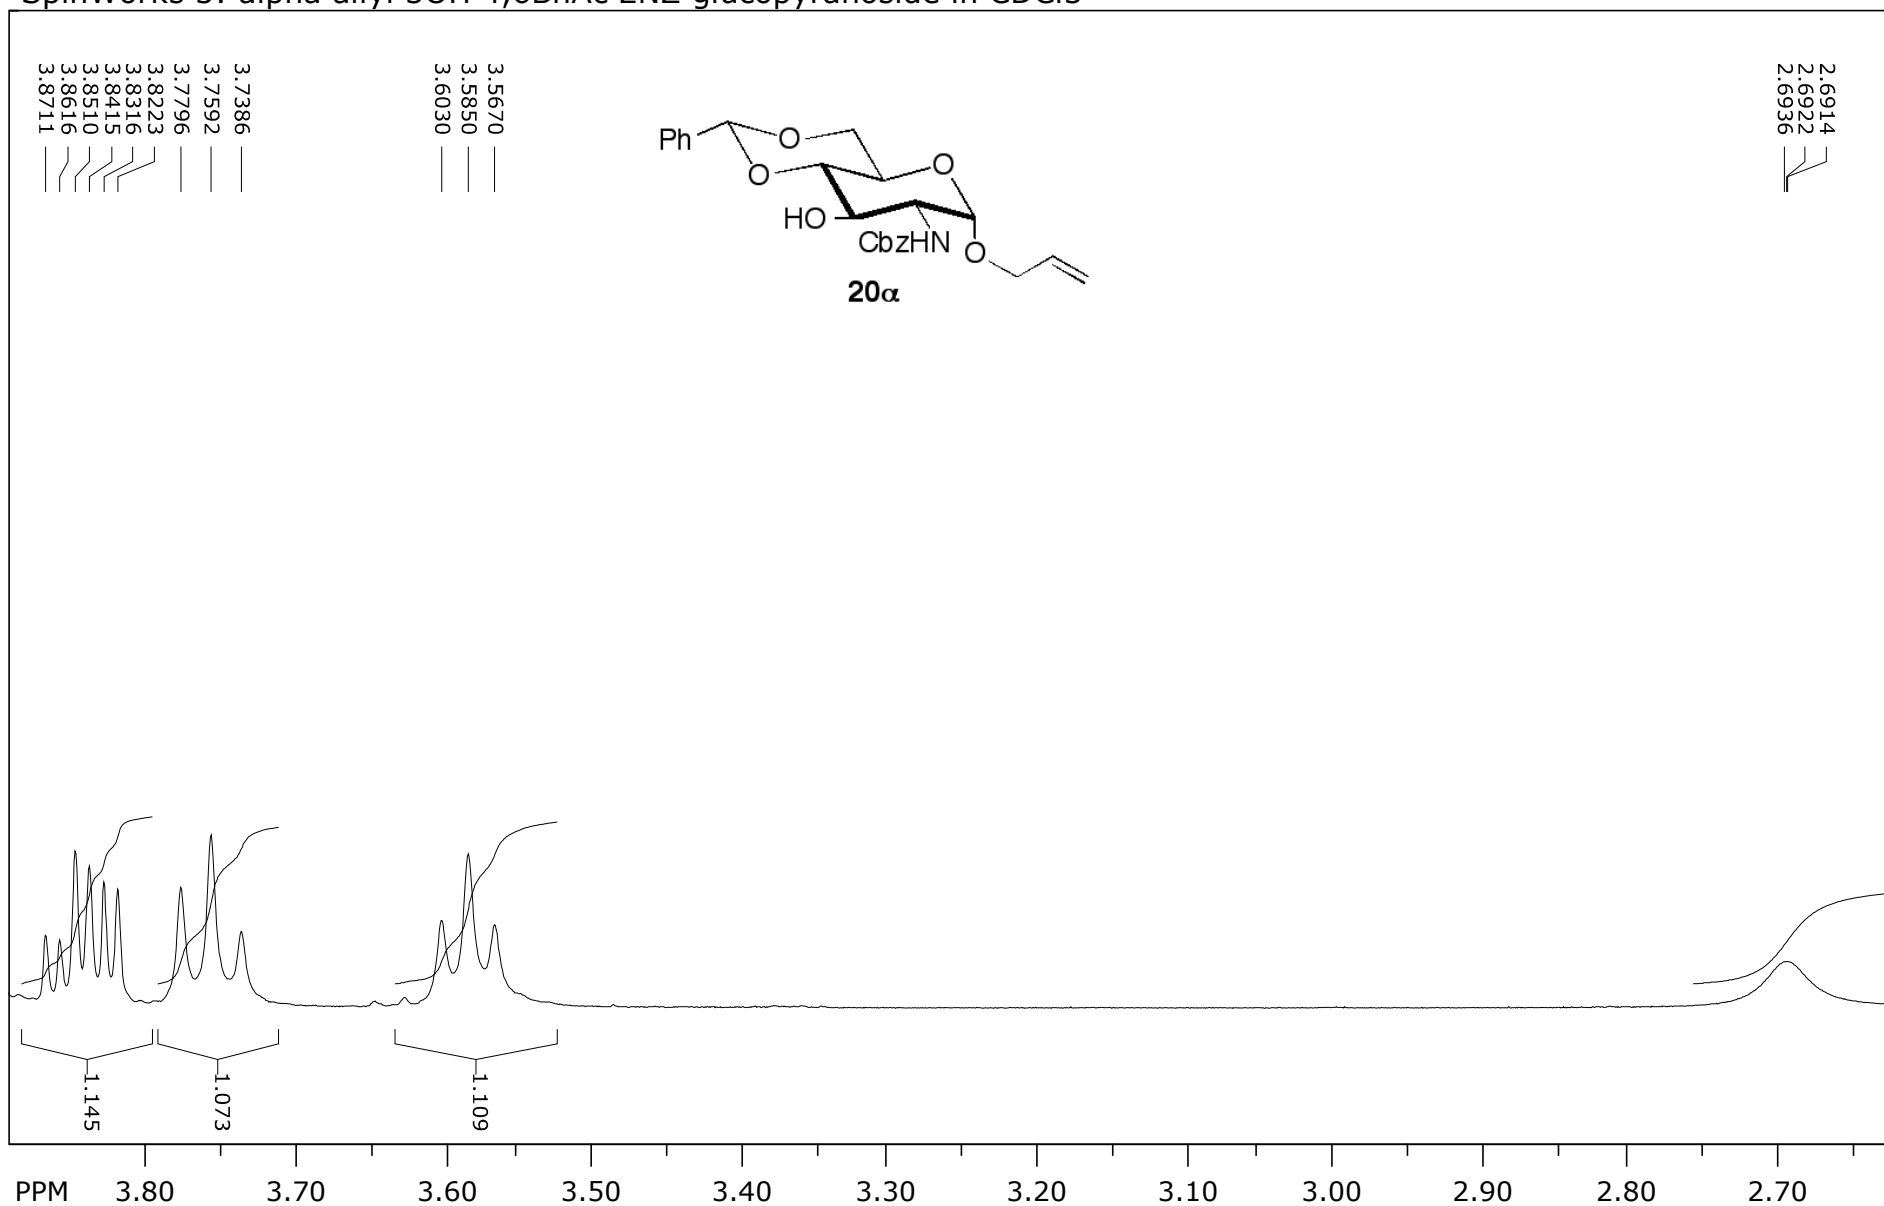

file: ...h alpha 3OH BnAc 1H in CDCl3\1\fid expt: <zg>  
transmitter freq.: 499.852499 MHz  
time domain size: 32768 points  
width: 5000.00 Hz = 10.0030 ppm = 0.152588 Hz/pt  
number of scans: 64

freq. of 0 ppm: 499.850012 MHz  
processed size: 16384 complex points  
LB: 0.000 GF: 0.0000  
Hz/cm: 25.485 ppm/cm: 0.05099

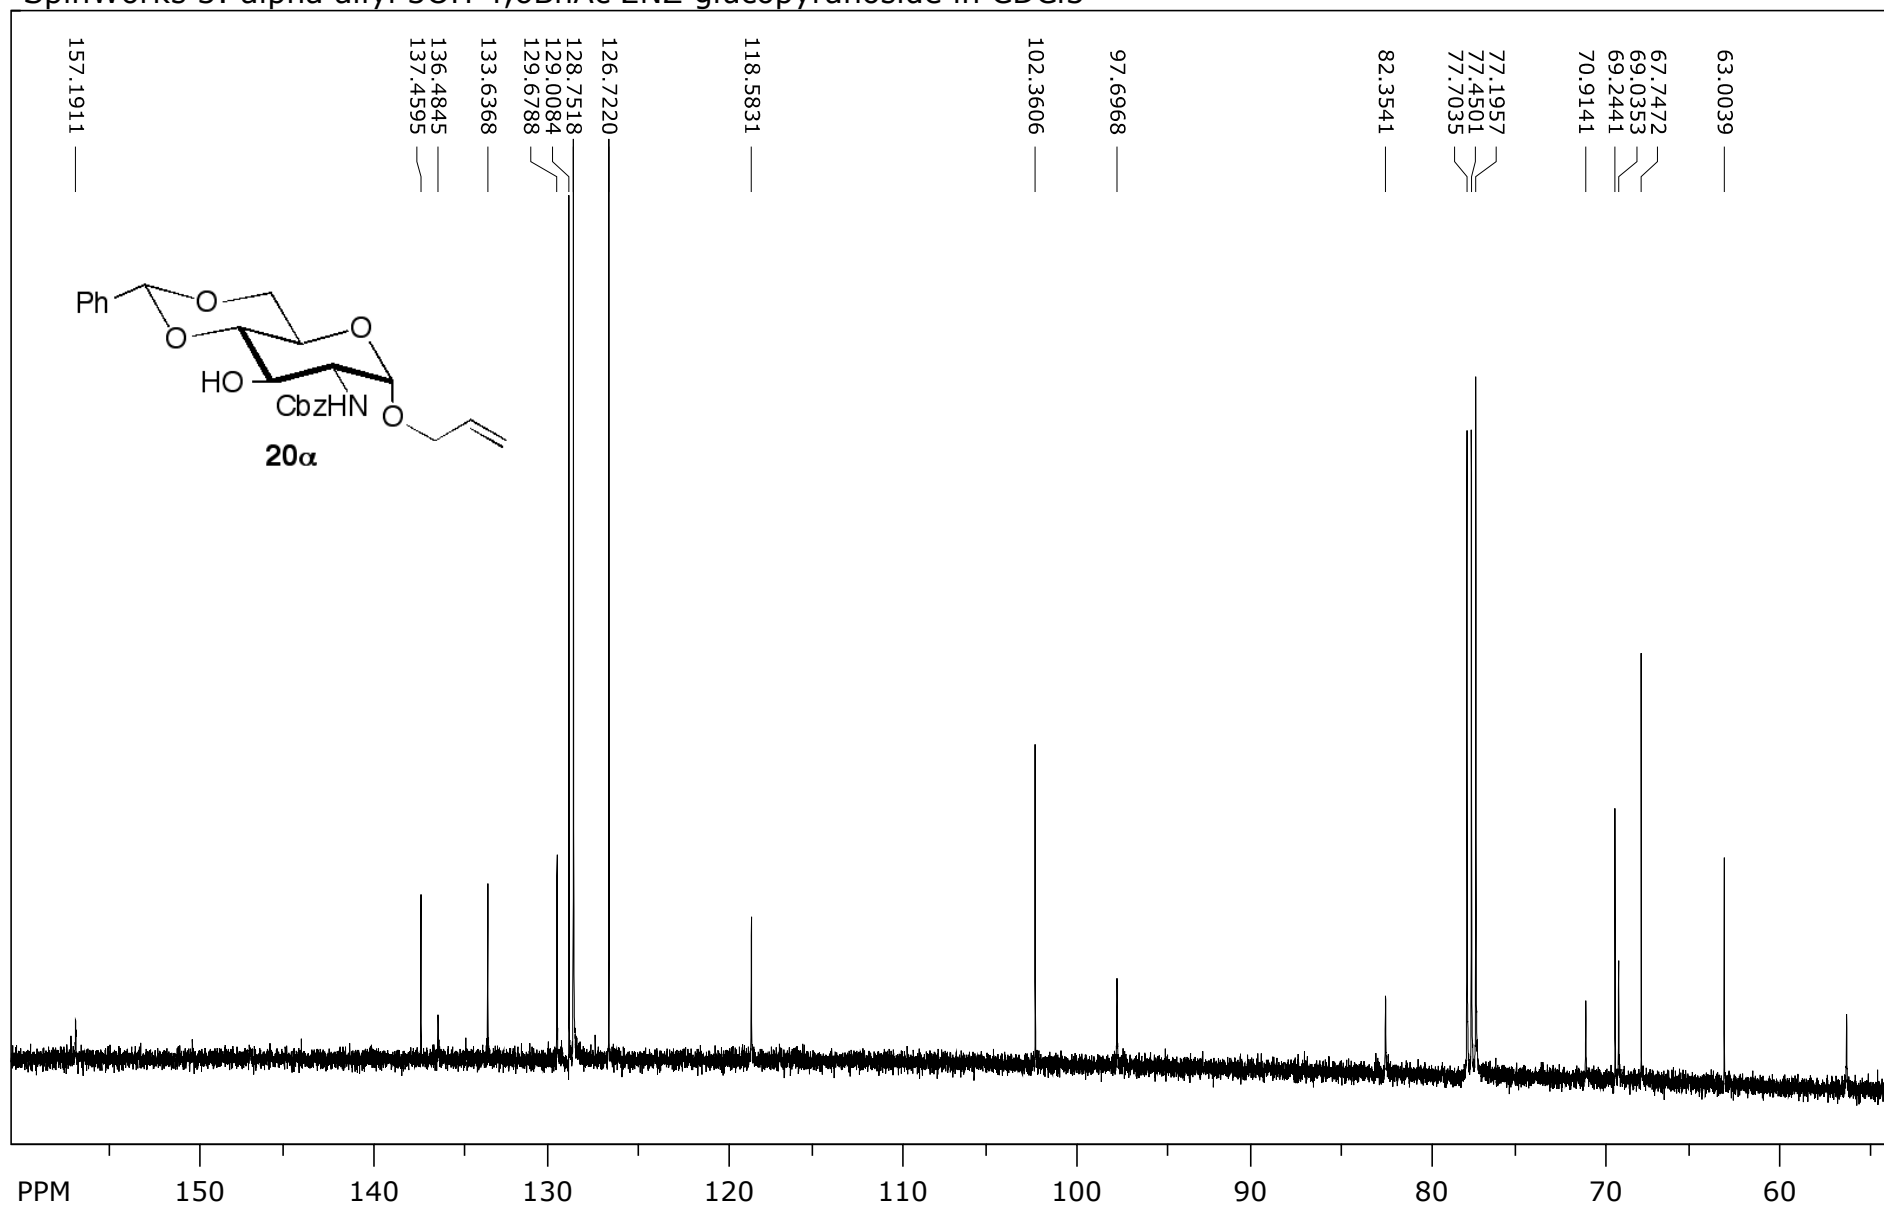

file: ... alpha 3OH BnAc 13C in CDCl3\1\fid expt: <zpgg>  
transmitter freq.: 125.699901 MHz  
time domain size: 65536 points  
width: 27777.78 Hz = 220.9849 ppm = 0.423855 Hz/pt  
number of scans: 3072

freq. of 0 ppm: 125.687332 MHz  
processed size: 32768 complex points  
LB: 0.000 GF: 0.0000  
Hz/cm: 540.574 ppm/cm: 4.30051

|               |               |             |                      |                 |              |                        |                       |
|---------------|---------------|-------------|----------------------|-----------------|--------------|------------------------|-----------------------|
| Sample Name   | Samp3 vial1   | Position    | Vial 21              | Instrument Name | Instrument 1 | User Name              | DYL                   |
| Inj Vol       | 3             | InjPosition |                      | SampleType      | Unknown      | IRM Calibration Status | Some Ions Missed      |
| Data Filename | S3redoVial1.d | ACQ Method  | C18 waters symmetry2 | Comment         |              | Acquired Time          | 9/20/2012 11:51:30 PM |

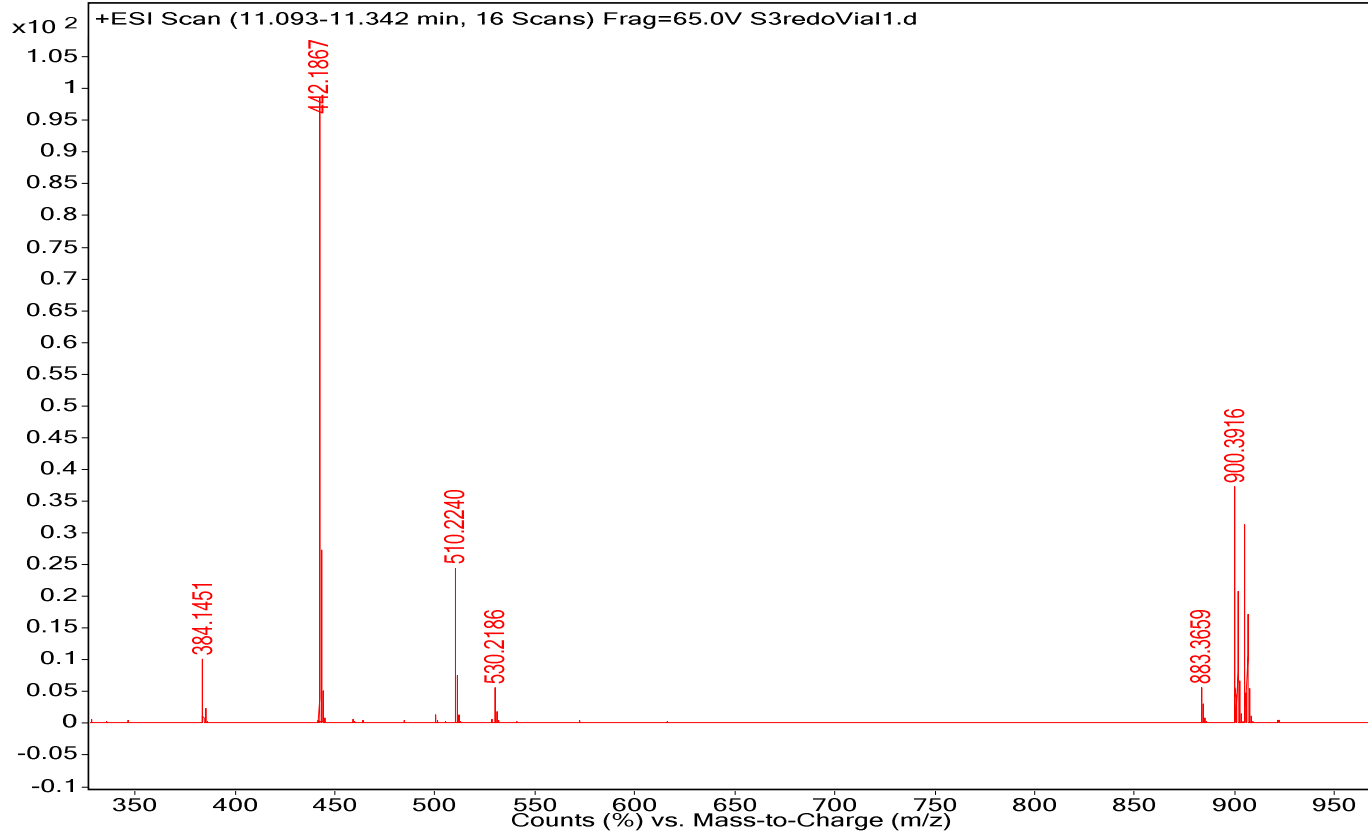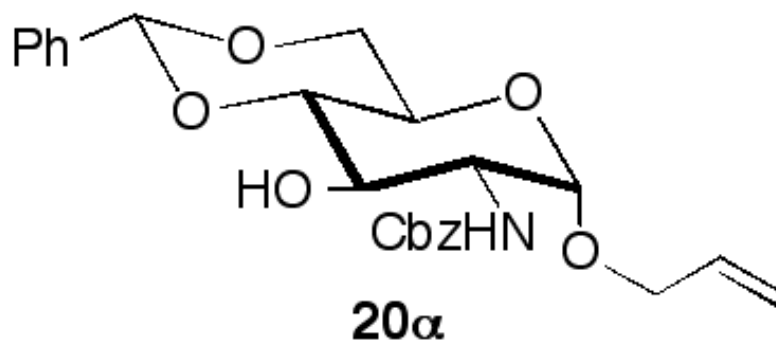



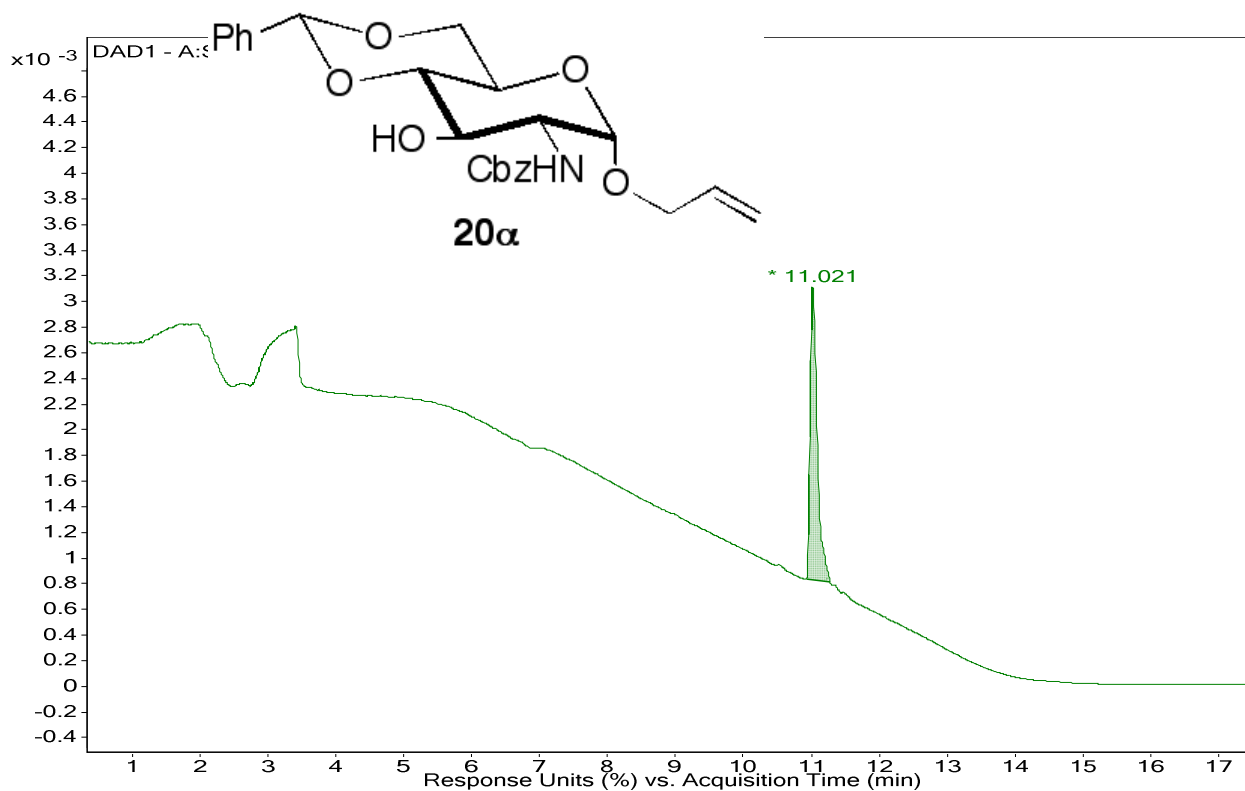

|               |               |             |                      |                 |              |                        |                       |
|---------------|---------------|-------------|----------------------|-----------------|--------------|------------------------|-----------------------|
| Sample Name   | Samp3 vial1   | Position    | Vial 21              | Instrument Name | Instrument 1 | User Name              | DYL                   |
| Inj Vol       | 3             | InjPosition |                      | SampleType      | Unknown      | IRM Calibration Status | Some Ions Missed      |
| Data Filename | S3redoVial1.d | ACQ Method  | C18 waters symmetry2 | Comment         |              | Acquired Time          | 9/20/2012 11:51:30 PM |

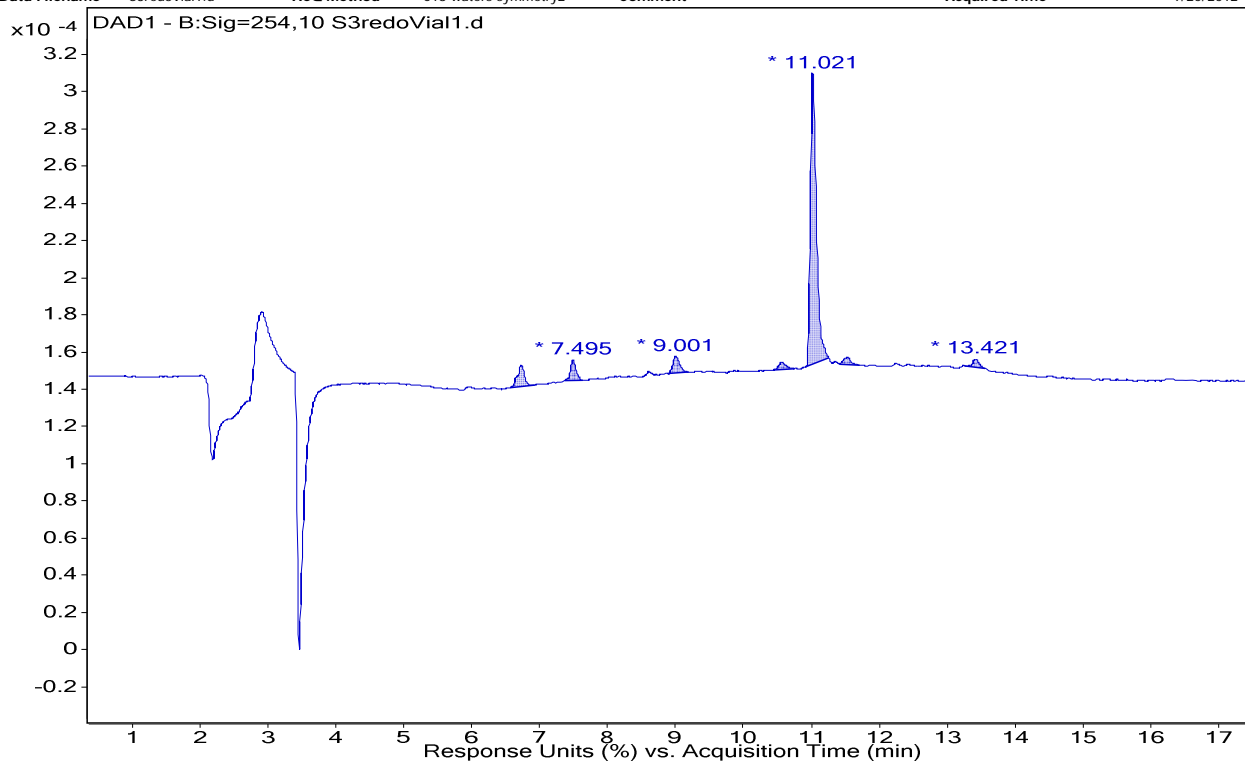

Analysis on a Waters SymmetryShield™ C18 (4.6 mm X 15 cm (i.d. x l.), 3.5  $\mu$ m) at 0.5 mL/min. Solvent A: 50 mM NH<sub>4</sub>OAc (aq); B: CH<sub>3</sub>CN

| Time (min) | % B |
|------------|-----|
| 0          | 20  |
| 1          | 20  |
| 10         | 100 |
| 20         | 100 |

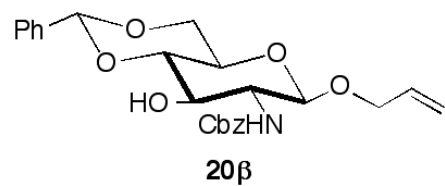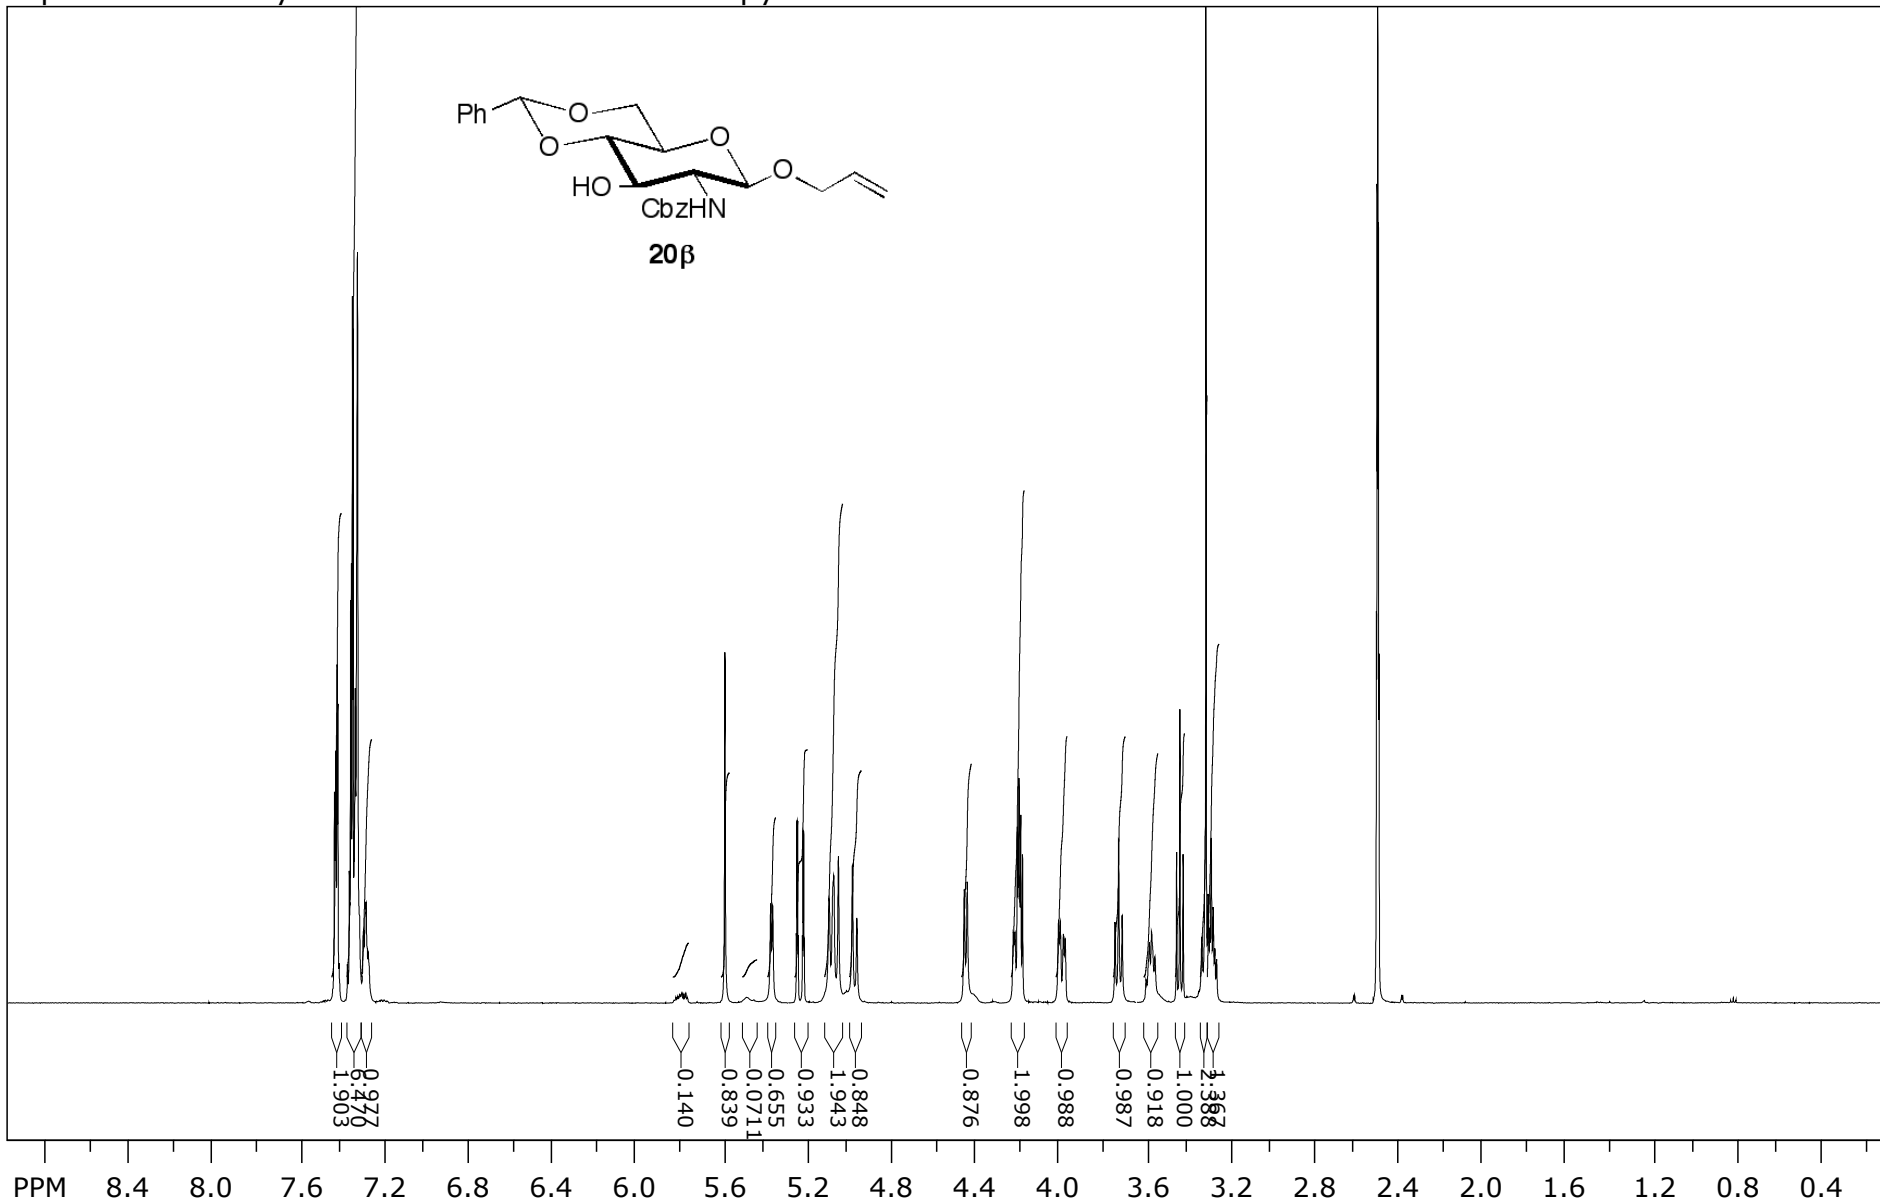

file: ...process\Allyl\_beta3OHGluBnAc\1\fid expt: <zgpr>  
transmitter freq.: 600.553538 MHz  
time domain size: 65536 points  
width: 8417.51 Hz = 14.0162 ppm = 0.128441 Hz/pt  
number of scans: 32

freq. of 0 ppm: 600.550016 MHz  
processed size: 262144 complex points  
LB: 0.000 GF: 0.0000  
Hz/cm: 214.759 ppm/cm: 0.35760

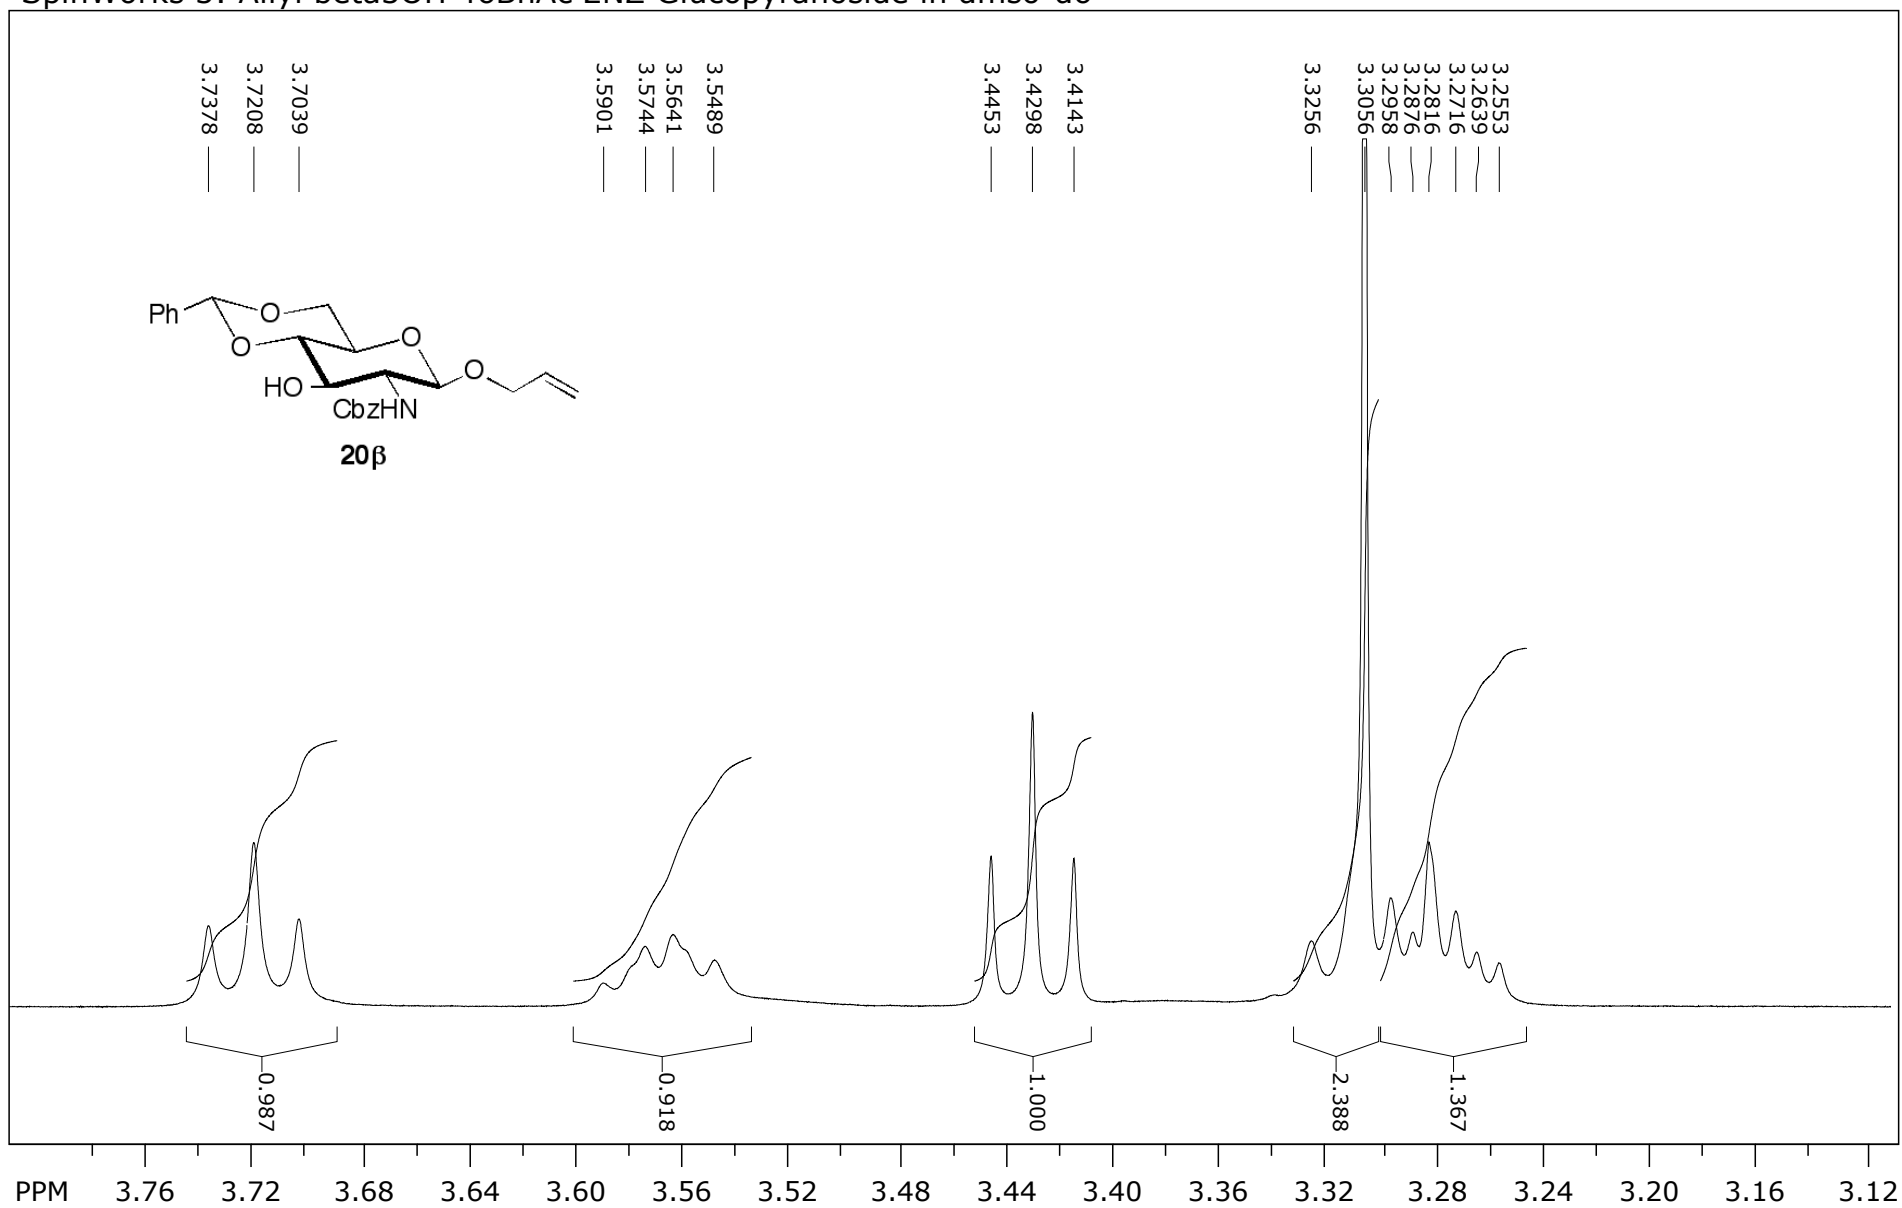

file: ...process\Allyl\_beta3OHGluBnAc\1\fid expt: <zgpr>  
 transmitter freq.: 600.553538 MHz  
 time domain size: 65536 points  
 width: 8417.51 Hz = 14.0162 ppm = 0.128441 Hz/pt  
 number of scans: 32

freq. of 0 ppm: 600.550016 MHz  
 processed size: 262144 complex points  
 LB: 0.000 GF: 0.0000  
 Hz/cm: 16.898 ppm/cm: 0.02814

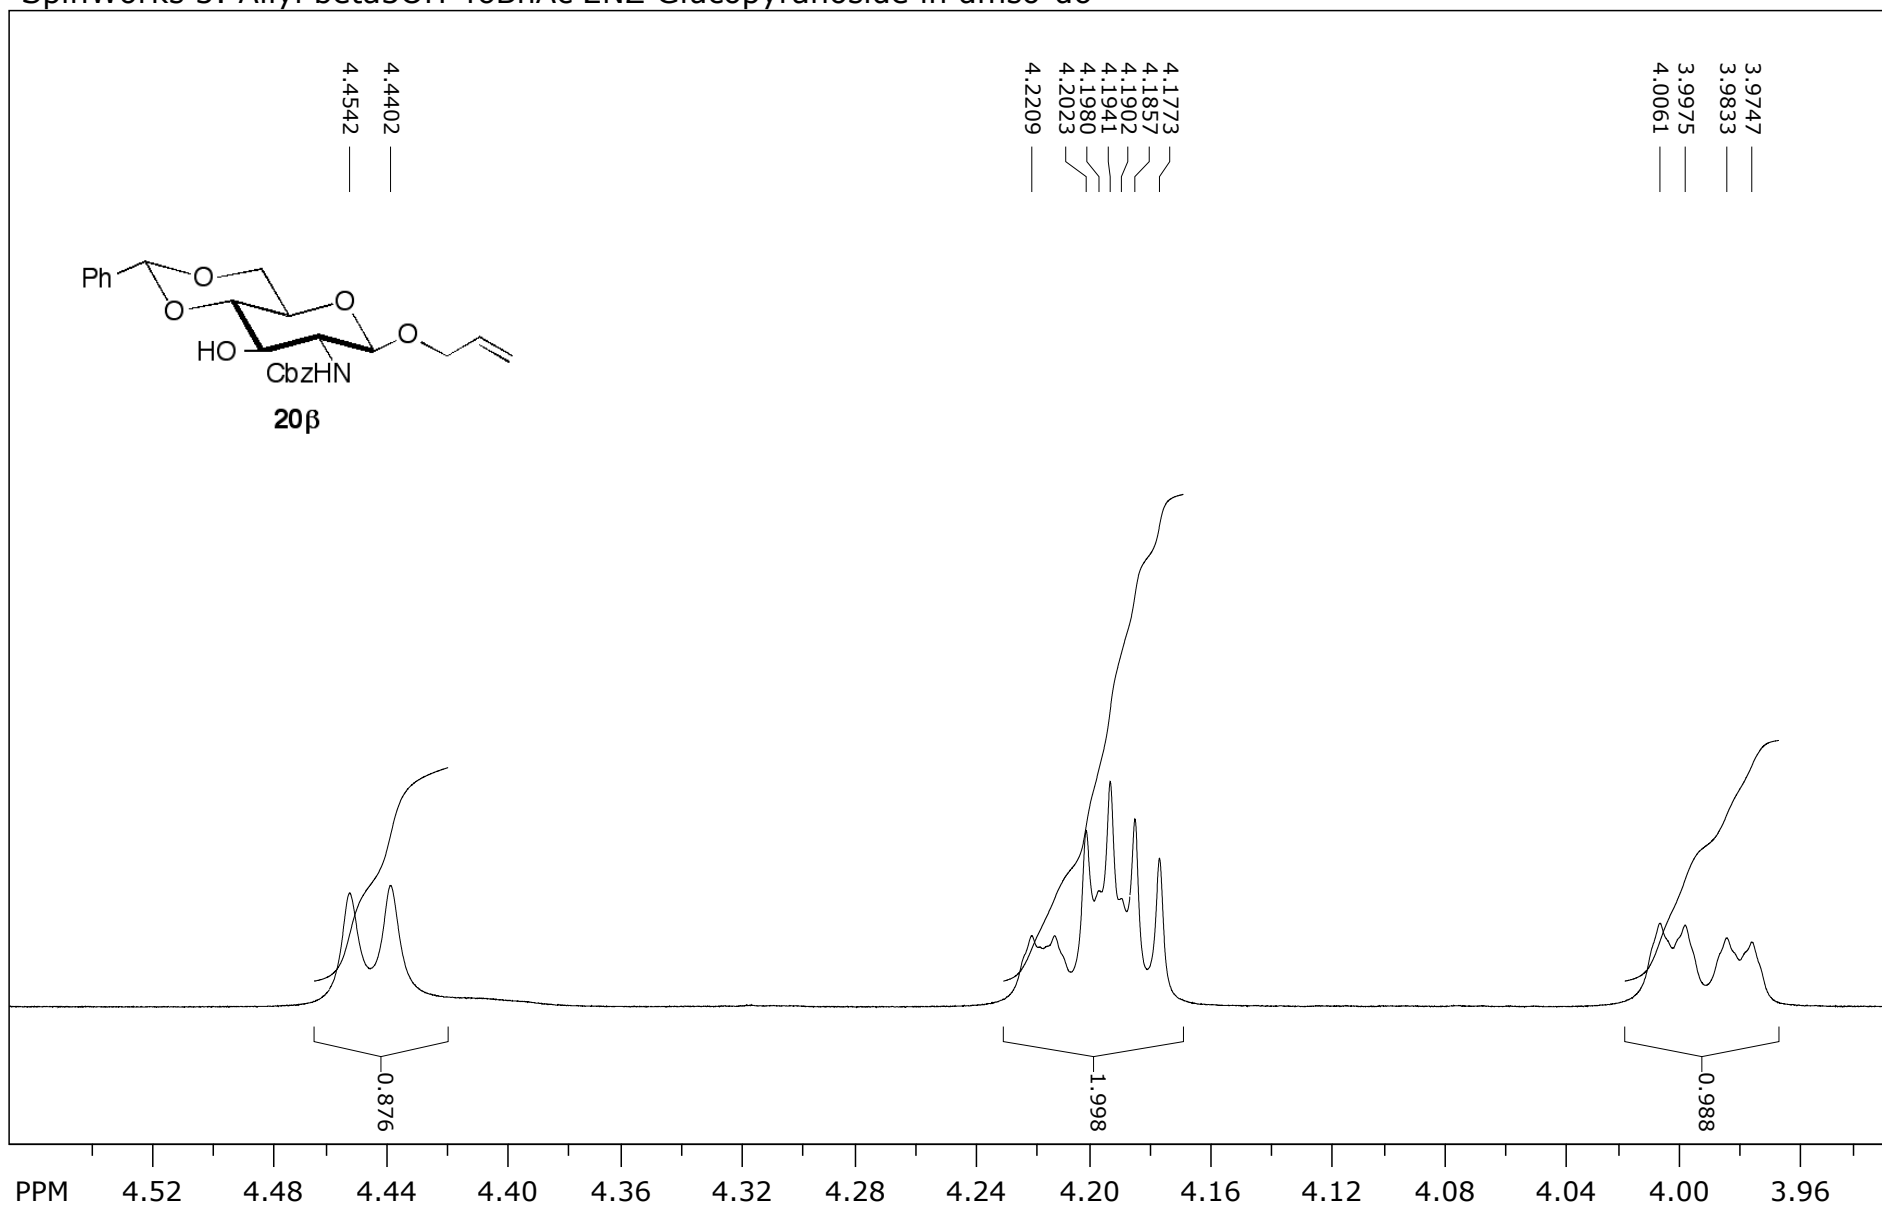

file: ...process\Allyl\_beta3OHGluBnAc\1\fid expt: <zgpr>  
transmitter freq.: 600.553538 MHz  
time domain size: 65536 points  
width: 8417.51 Hz = 14.0162 ppm = 0.128441 Hz/pt  
number of scans: 32

freq. of 0 ppm: 600.550016 MHz  
processed size: 262144 complex points  
LB: 0.000 GF: 0.0000  
Hz/cm: 15.460 ppm/cm: 0.02574

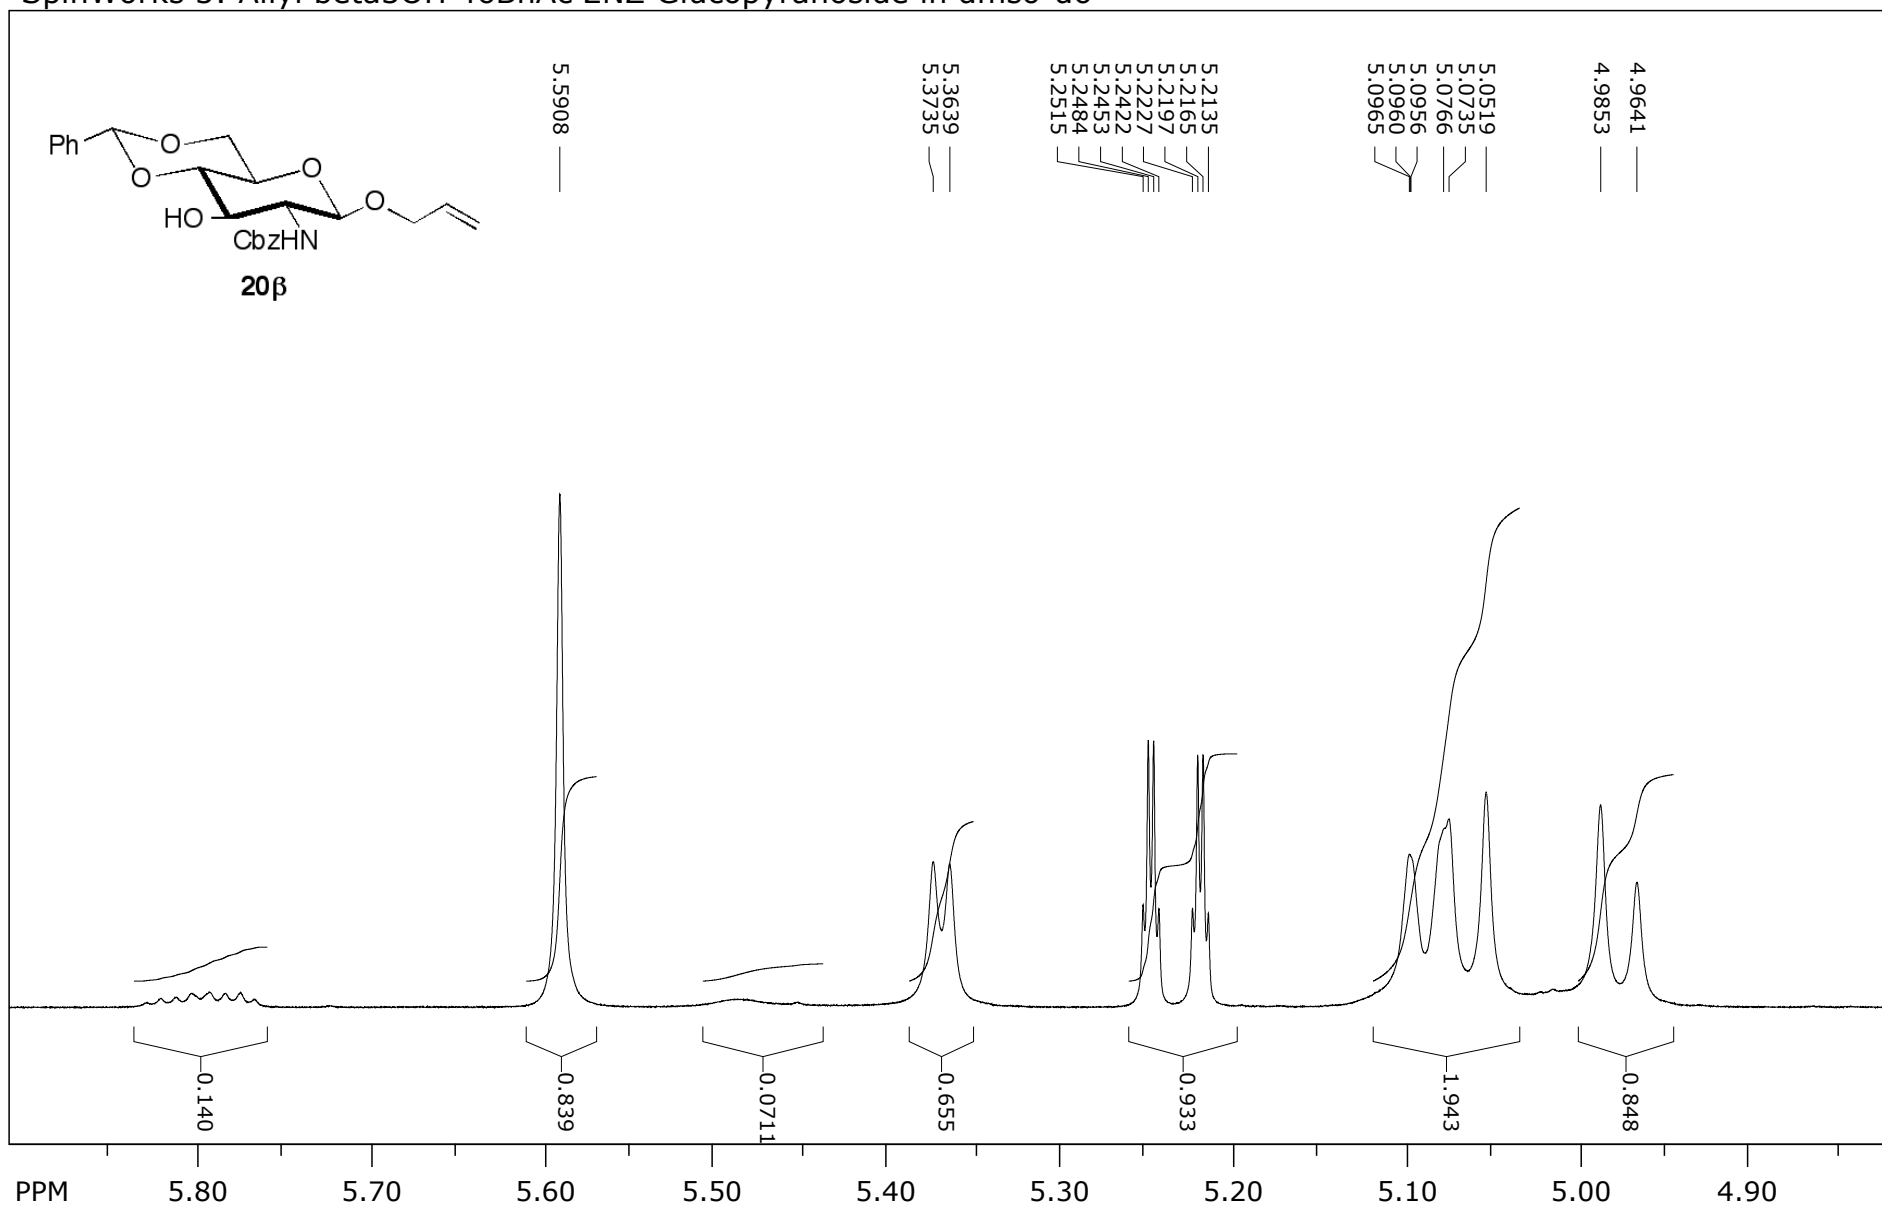

file: ...process\Allyl\_beta3OHGluBnAc\1\fid expt: <zgpr>  
transmitter freq.: 600.553538 MHz  
time domain size: 65536 points  
width: 8417.51 Hz = 14.0162 ppm = 0.128441 Hz/pt  
number of scans: 32

freq. of 0 ppm: 600.550016 MHz  
processed size: 262144 complex points  
LB: 0.000 GF: 0.0000  
Hz/cm: 26.305 ppm/cm: 0.04380

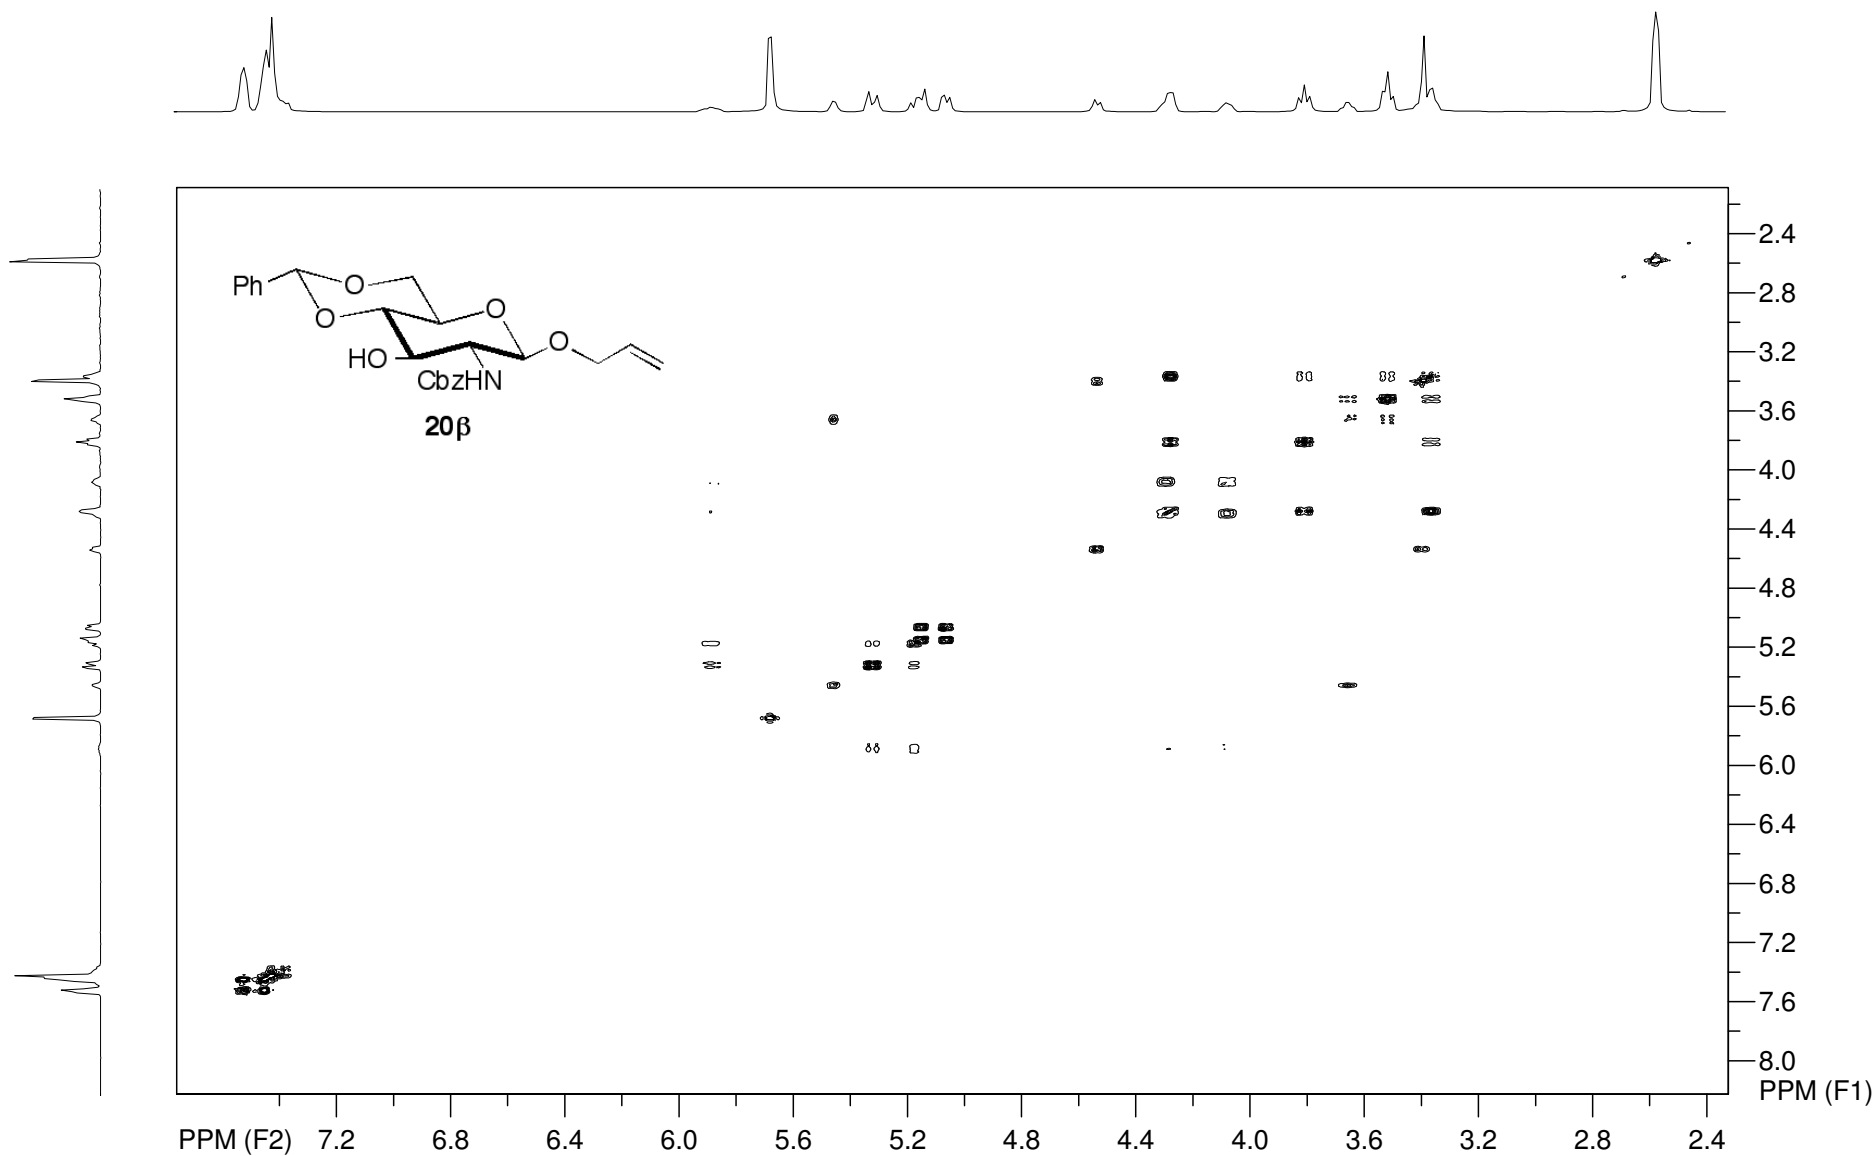

file: C:\Users\Jeff\Documents\NMR Folder\NMR Data\remaining to process\Allyl\_beta3OHGluBnAcdrF2:freq. of 0 ppm: 600.549962 MHz  
transmitter freq.: 600.552832 MHz  
time domain size: 2048 by 1024 points  
width (F2): 6009.59 Hz = 10.006806 ppm = 2.934368 Hz/pt  
number of scans: 2

processed size: 1024 complex points  
window function: Sine  
shift: 0.0 degrees  
Hz/cm: 159.213 ppm/cm: 0.26511

F1: freq. of 0 ppm: 600.549962 MHz  
processed size: 1024 complex points  
window function: Sine  
shift: 0.0 degrees  
Hz/cm: 307.245 ppm/cm: 0.51160

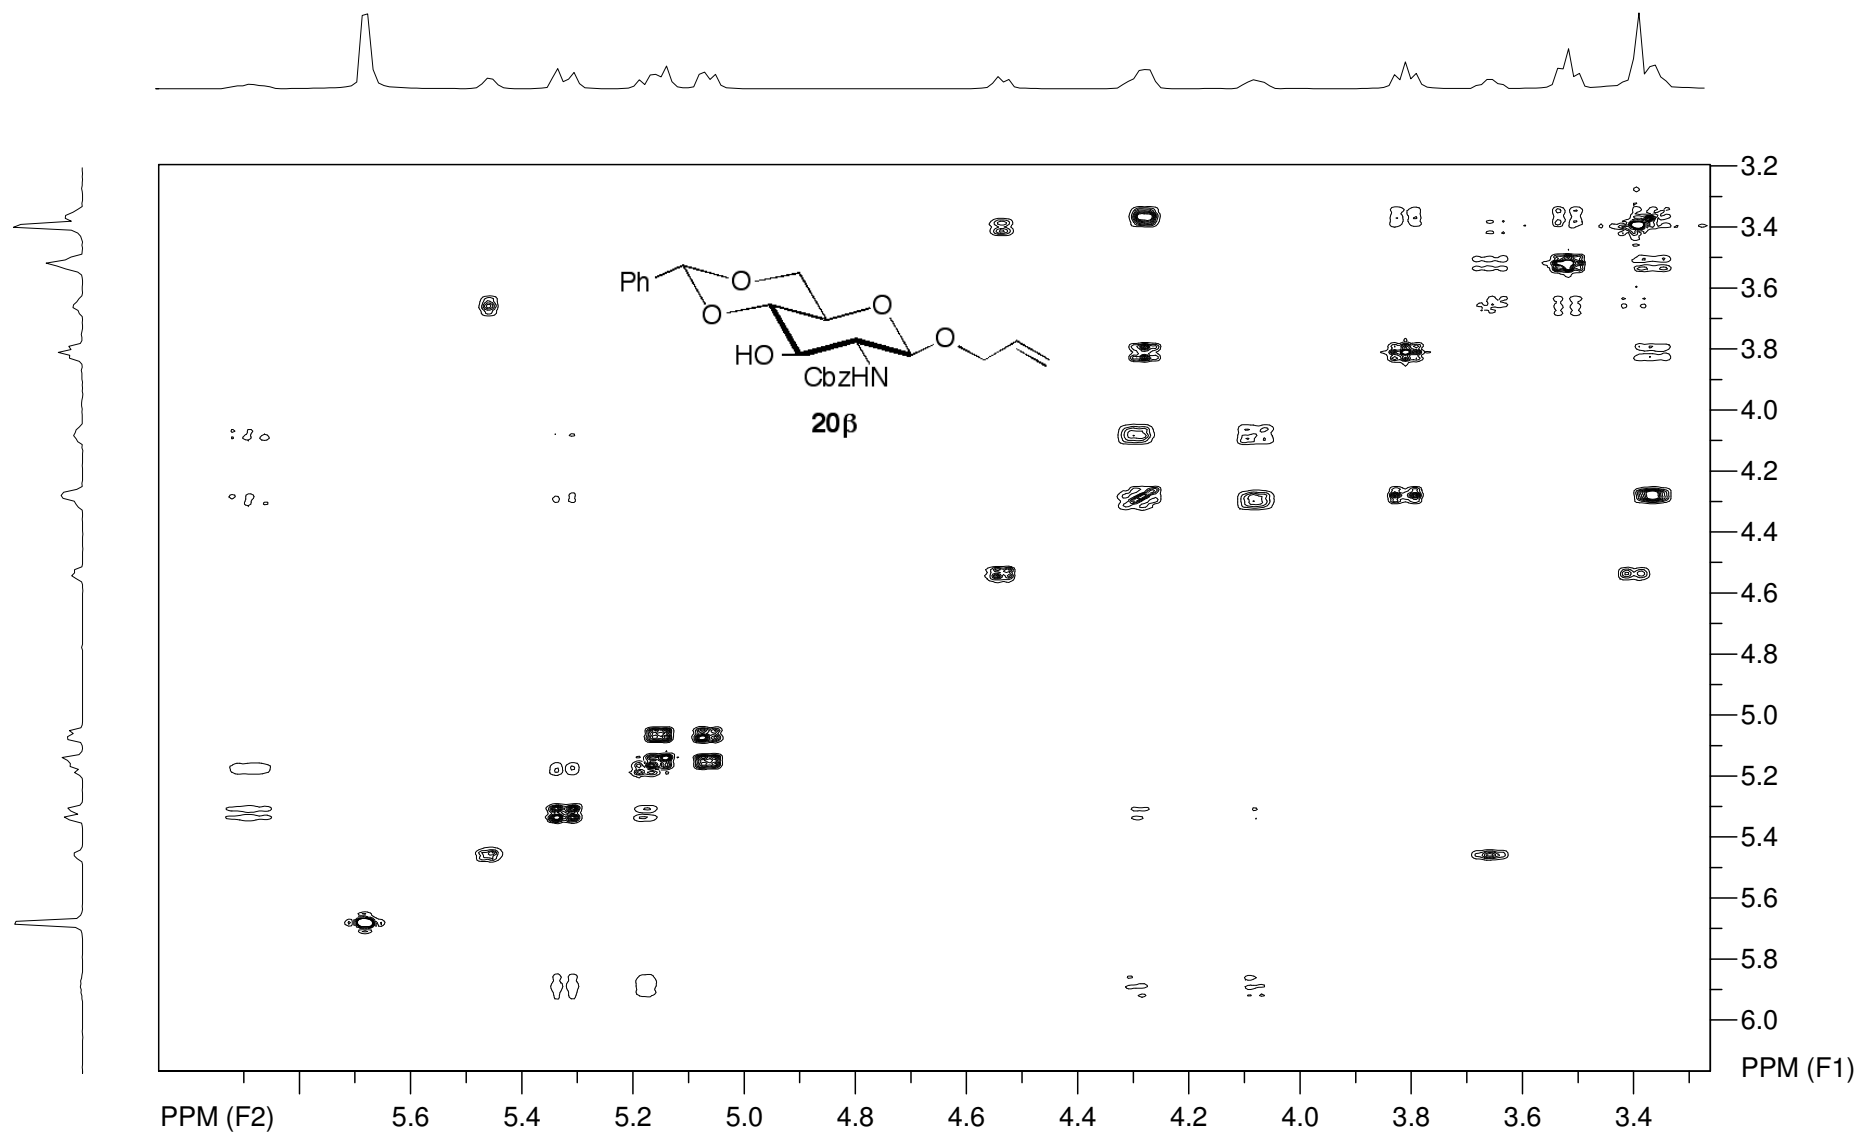

file: C:\Users\Jeff\Documents\NMR Folder\NMR Data\remaining to process\Allyl\_beta3OHGluBnAcdrF2: freq. of 0 ppm: 600.549962 MHz  
transmitter freq.: 600.552832 MHz  
time domain size: 2048 by 1024 points  
width (F2): 6009.59 Hz = 10.006806 ppm = 2.934368 Hz/pt  
number of scans: 2

processed size: 1024 complex points  
window function: Sine  
shift: 0.0 degrees  
Hz/cm: 81.761 ppm/cm: 0.13614

F1: freq. of 0 ppm: 600.549962 MHz  
processed size: 1024 complex points  
window function: Sine  
shift: 0.0 degrees  
Hz/cm: 148.761 ppm/cm: 0.24771

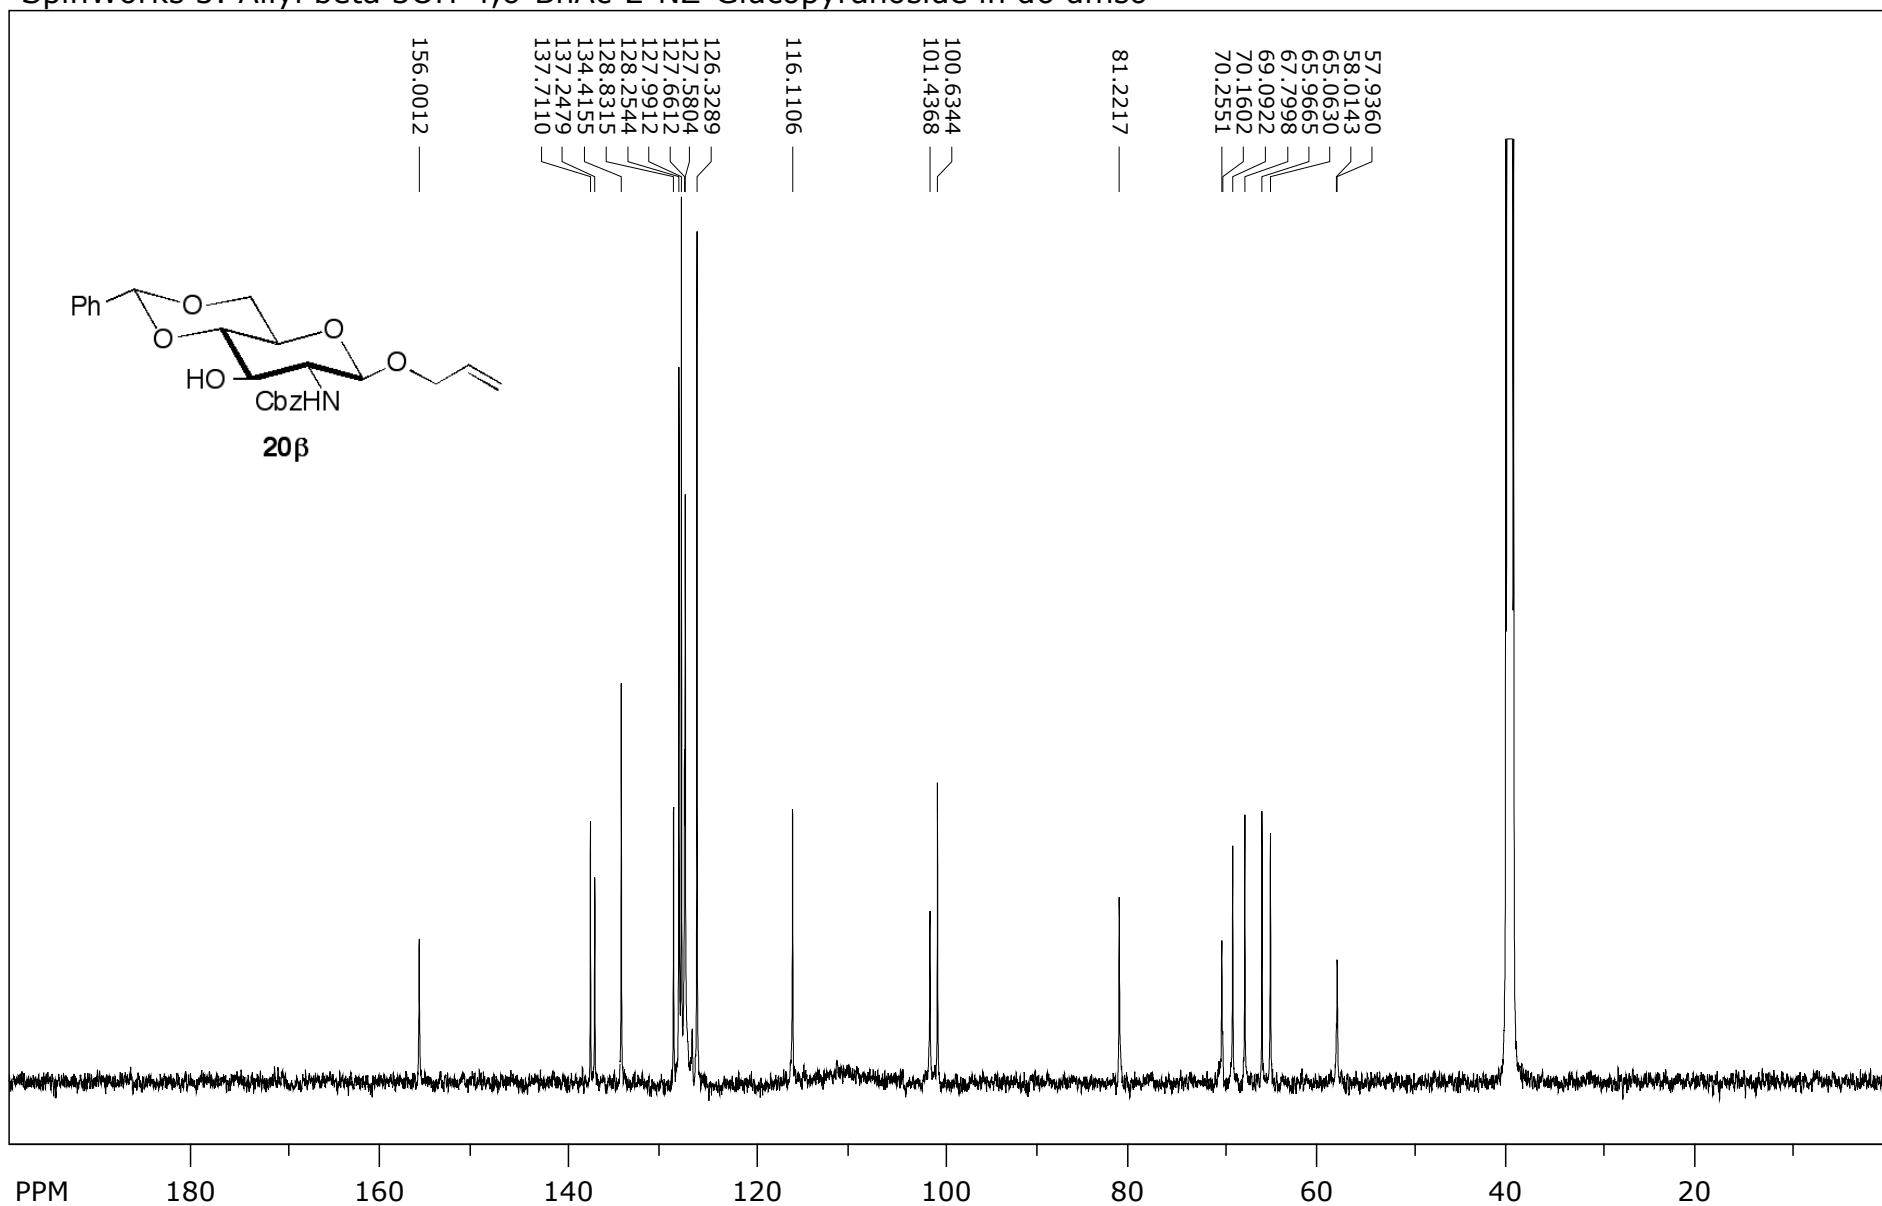

file: ...\\Allyl\_beta3OHGluBnAc dms13C\\1\\fid expt: <zpgg30>  
transmitter freq.: 151.023519 MHz  
time domain size: 65536 points  
width: 36057.69 Hz = 238.7555 ppm = 0.550197 Hz/pt  
number of scans: 4096

freq. of 0 ppm: 151.008494 MHz  
processed size: 32768 complex points  
LB: 5.000 GF: 0.0000  
Hz/cm: 1214.533 ppm/cm: 8.04201



|               |            |             |                      |                 |              |                        |                      |
|---------------|------------|-------------|----------------------|-----------------|--------------|------------------------|----------------------|
| Sample Name   | columnprep | Position    | Vial 24              | Instrument Name | Instrument 1 | User Name              | DYL                  |
| Inj Vol       | 3          | InjPosition |                      | SampleType      | Unknown      | IRM Calibration Status | Some Ions Missed     |
| Data Filename | S4vial2.d  | ACQ Method  | C18 waters symmetry2 | Comment         |              | Acquired Time          | 9/21/2012 2:32:27 AM |

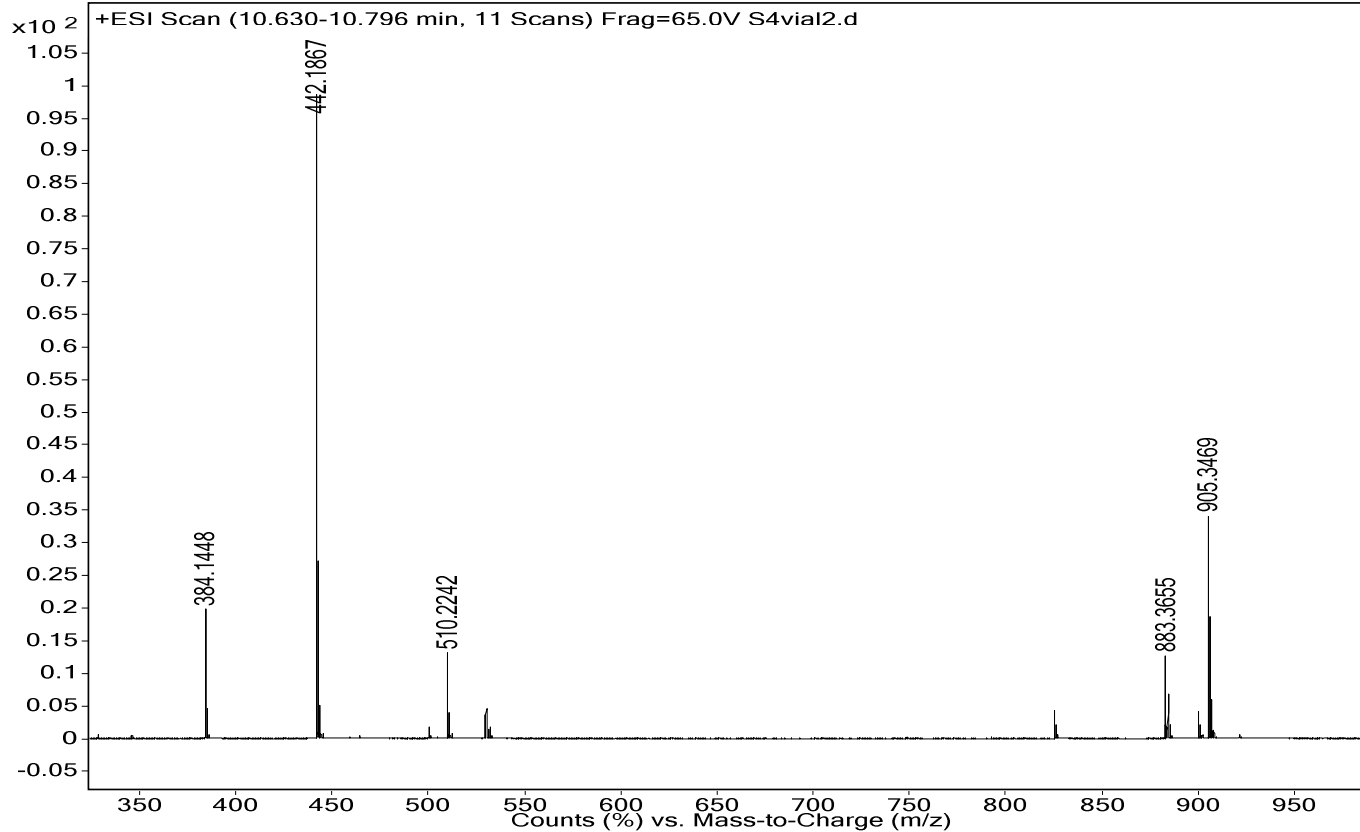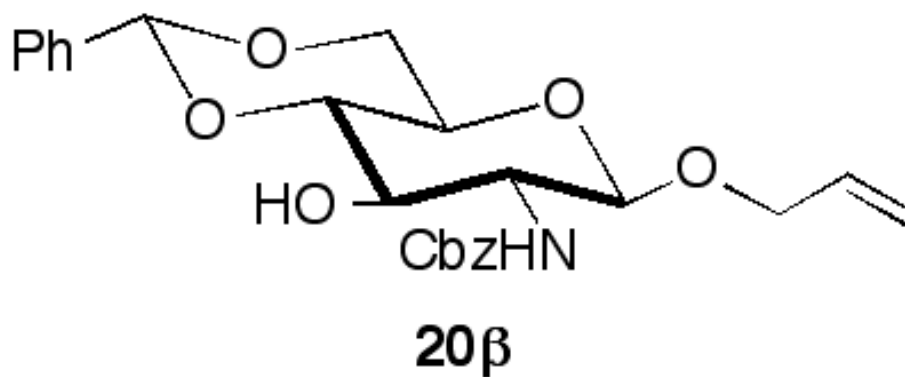

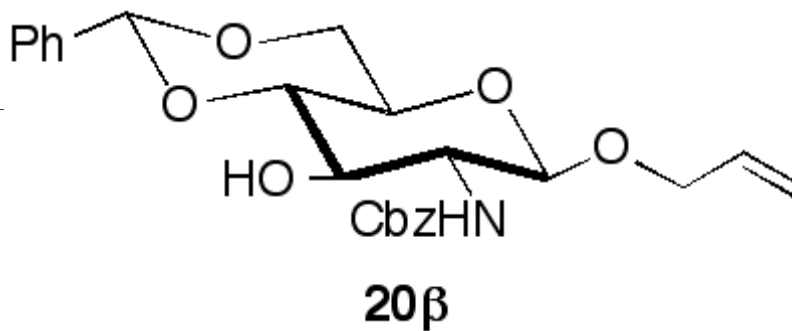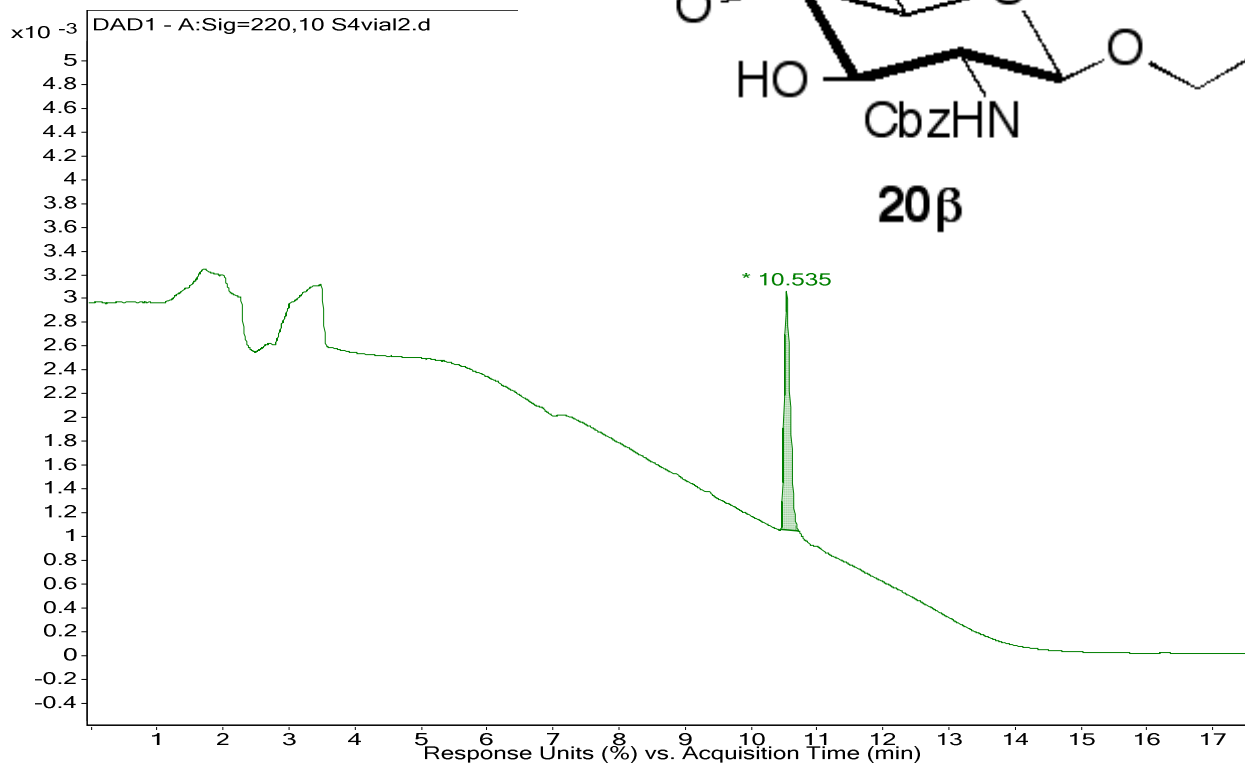

|               |            |             |                      |                 |              |                        |                      |
|---------------|------------|-------------|----------------------|-----------------|--------------|------------------------|----------------------|
| Sample Name   | columnprep | Position    | Vial 24              | Instrument Name | Instrument 1 | User Name              | DYL                  |
| Inj Vol       | 3          | InjPosition |                      | SampleType      | Unknown      | IRM Calibration Status | Some Ions Missed     |
| Data Filename | S4vial2.d  | ACQ Method  | C18 waters symmetry2 | Comment         |              | Acquired Time          | 9/21/2012 2:32:27 AM |

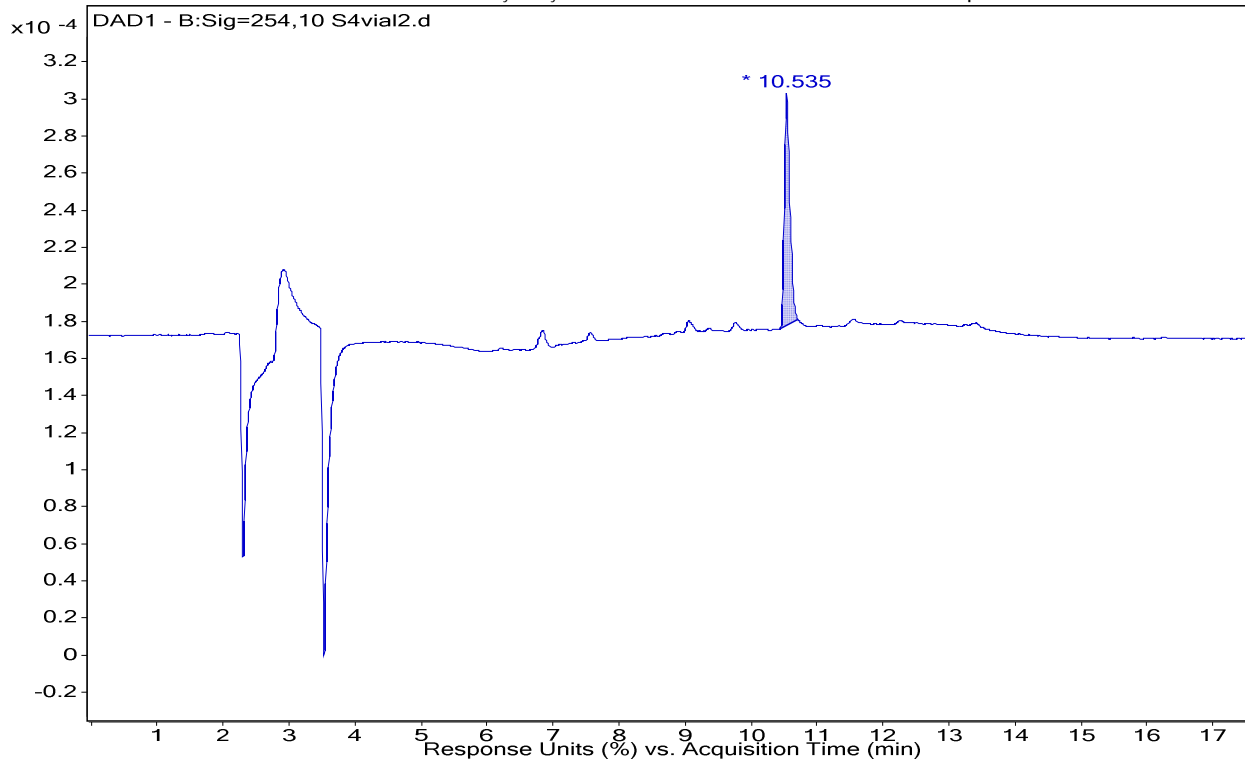

Analysis on a Waters SymmetryShield™ C18 (4.6 mm X 15 cm (i.d. x l.), 3.5  $\mu$ m) at 0.5 mL/min. Solvent A: 50 mM NH<sub>4</sub>OAc (aq); B: CH<sub>3</sub>CN

| Time (min) | % B |
|------------|-----|
| 0          | 20  |
| 1          | 20  |
| 10         | 100 |
| 20         | 100 |

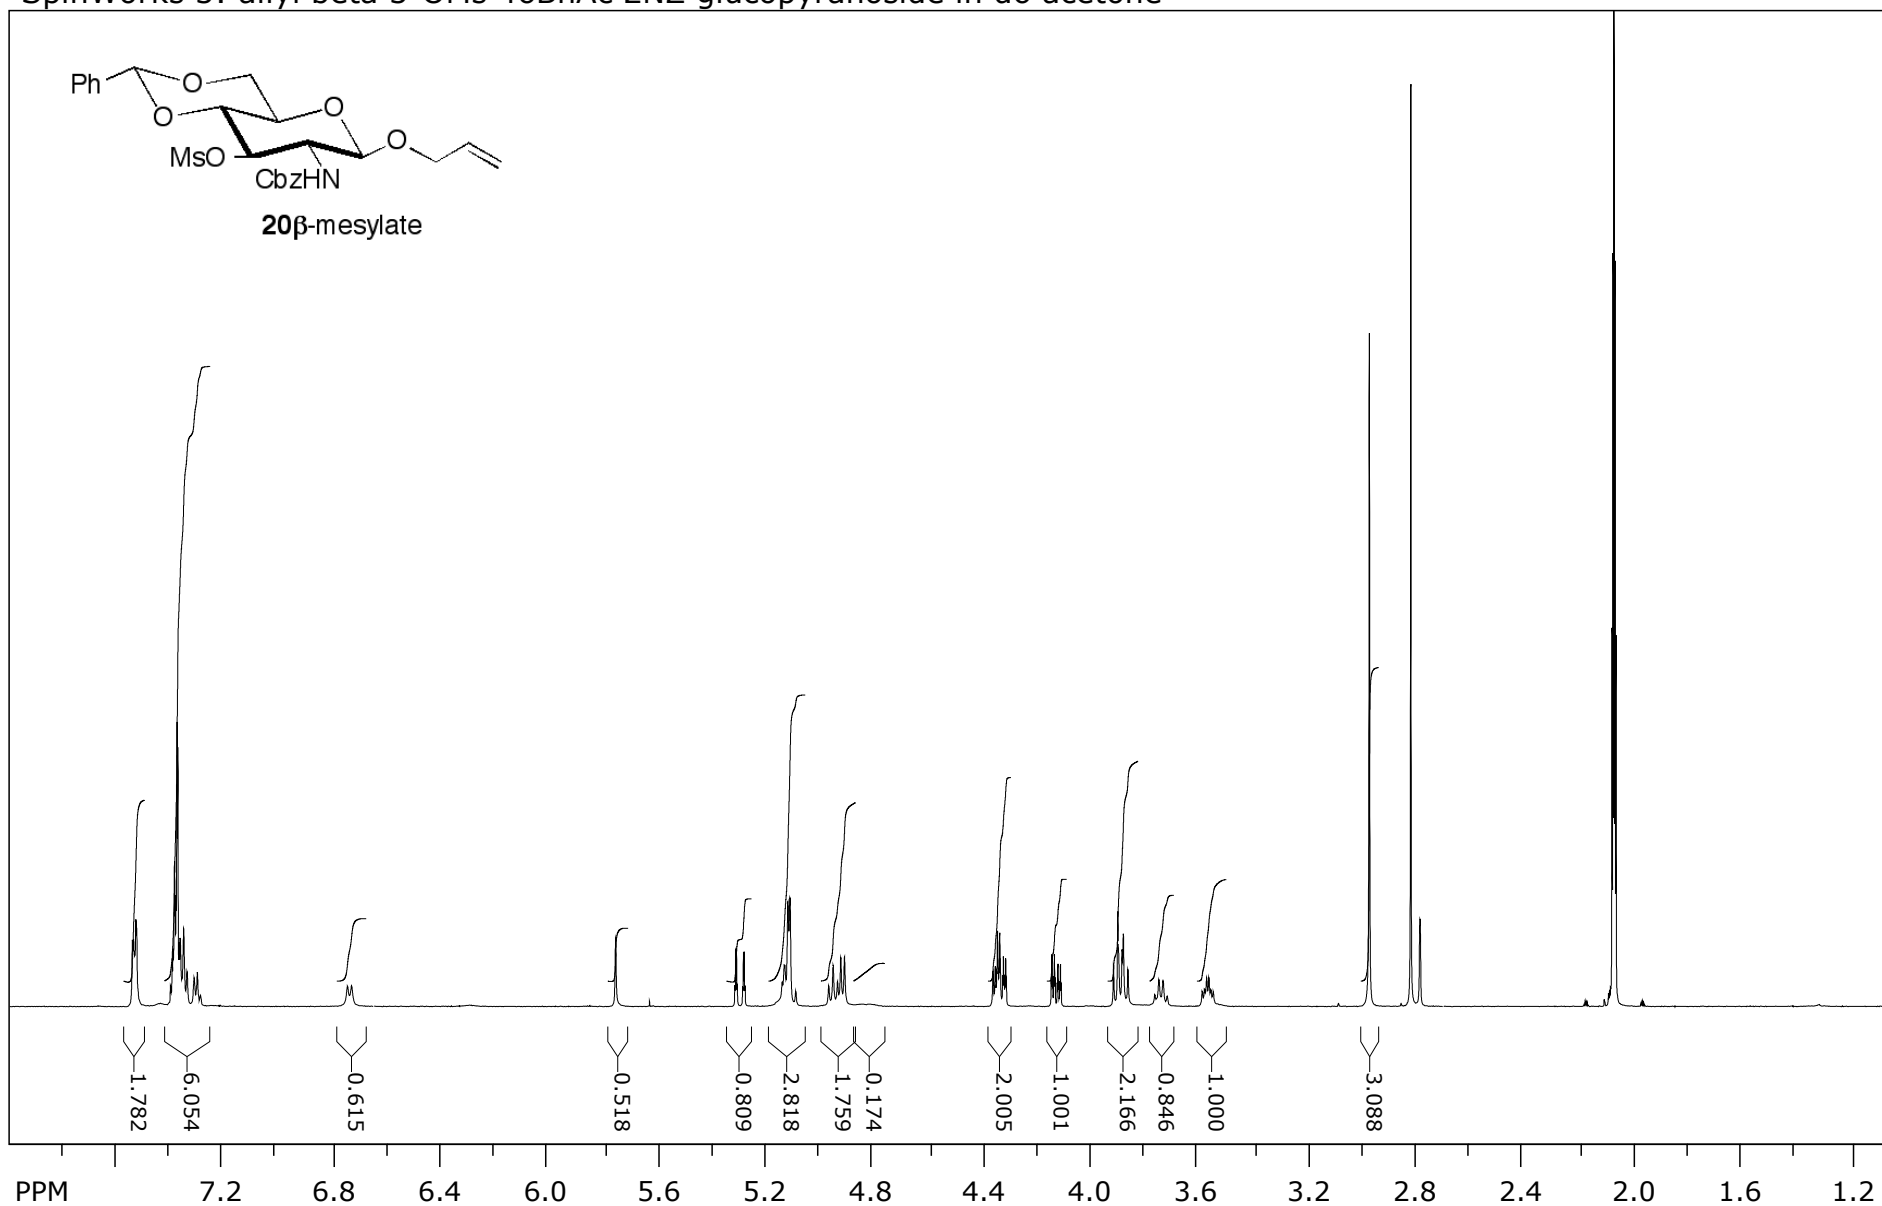

file: ...to process\BetaGlu3OMsd6Acet\1\fid expt: <zgpr>  
transmitter freq.: 600.553538 MHz  
time domain size: 65536 points  
width: 8417.51 Hz = 14.0162 ppm = 0.128441 Hz/pt  
number of scans: 32

freq. of 0 ppm: 600.550010 MHz  
processed size: 262144 complex points  
LB: 0.000 GF: 0.0000  
Hz/cm: 167.411 ppm/cm: 0.27876

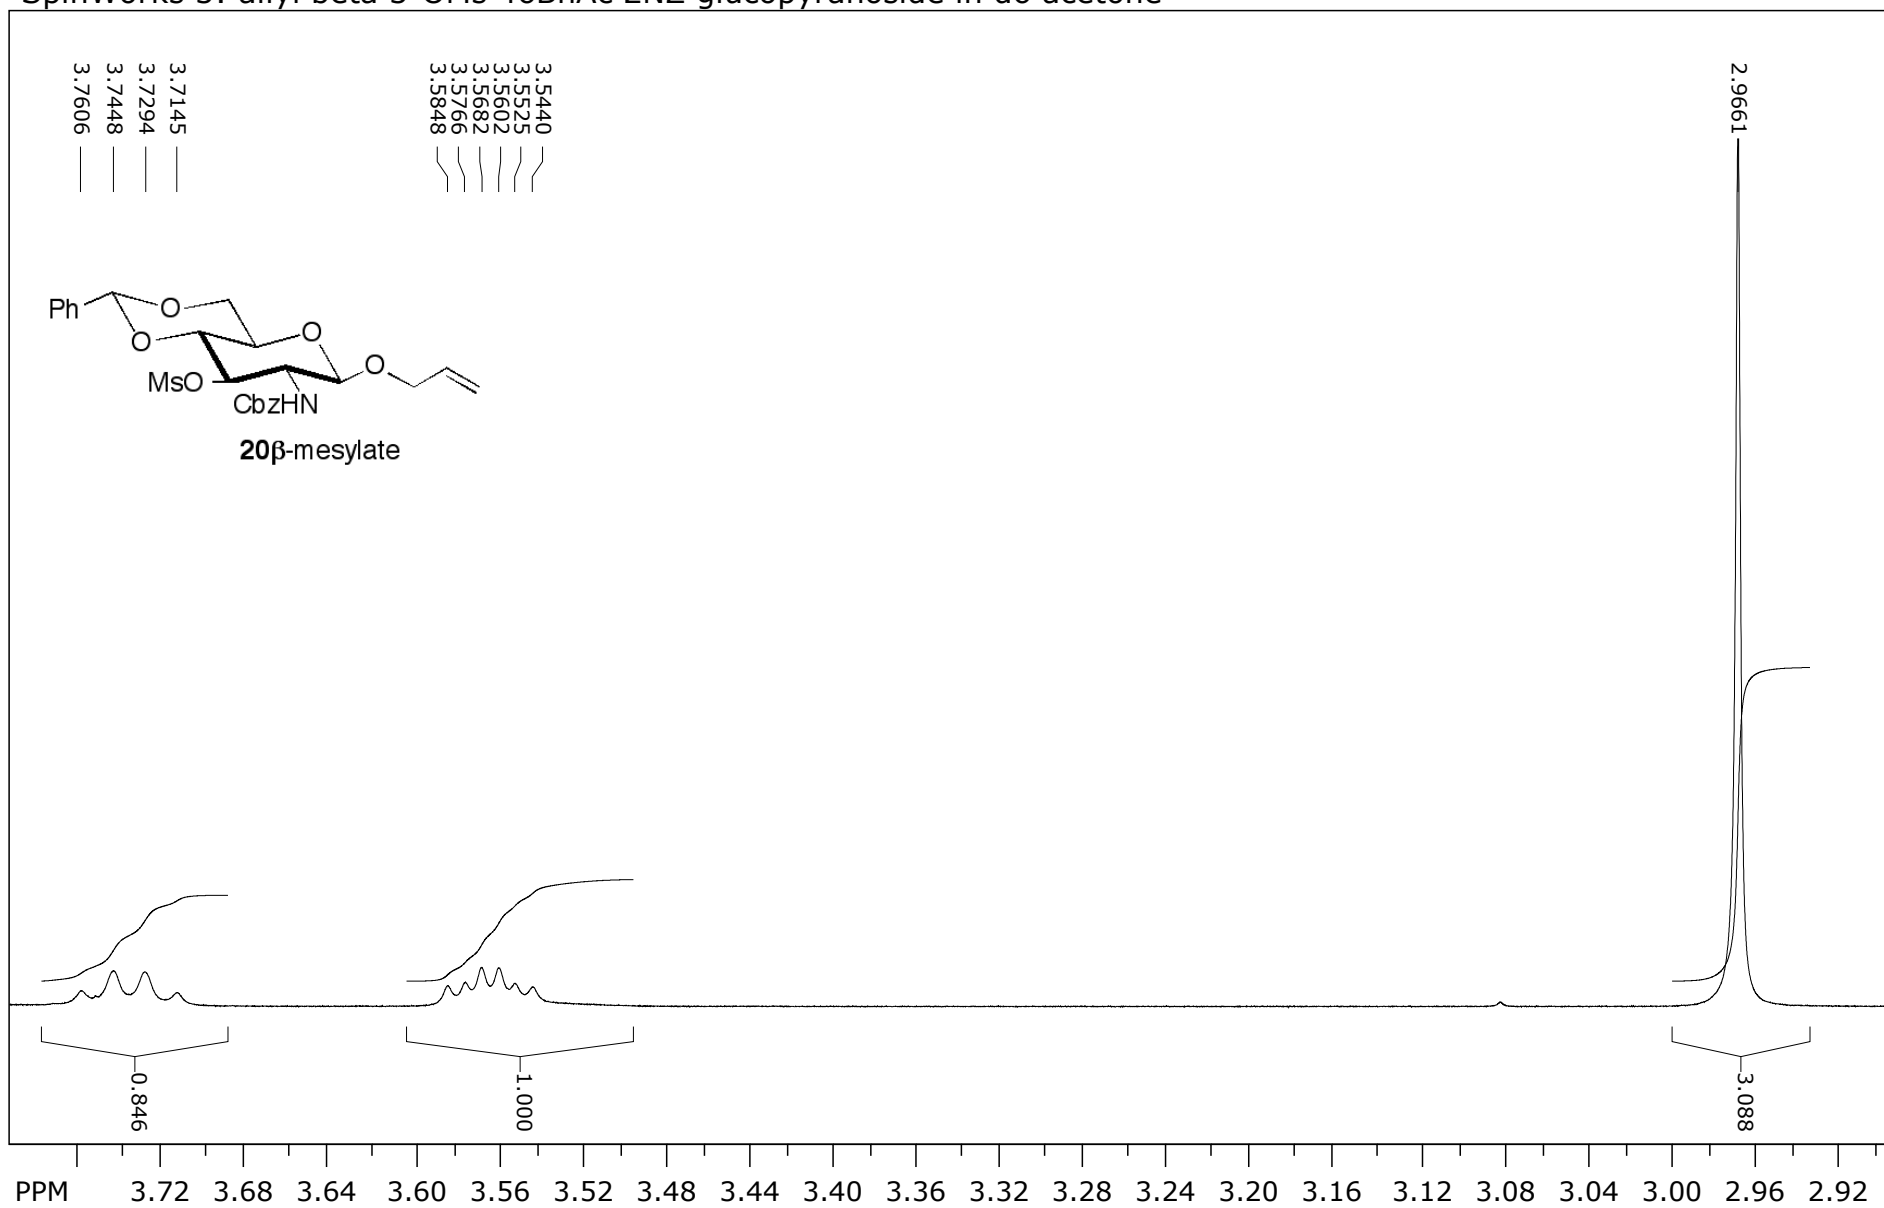

file: ...to process\BetaGlu3OMsd6Acet\1\fid expt: <zgpr>  
transmitter freq.: 600.553538 MHz  
time domain size: 65536 points  
width: 8417.51 Hz = 14.0162 ppm = 0.128441 Hz/pt  
number of scans: 32

freq. of 0 ppm: 600.550010 MHz  
processed size: 262144 complex points  
LB: 0.000 GF: 0.0000  
Hz/cm: 21.674 ppm/cm: 0.03609

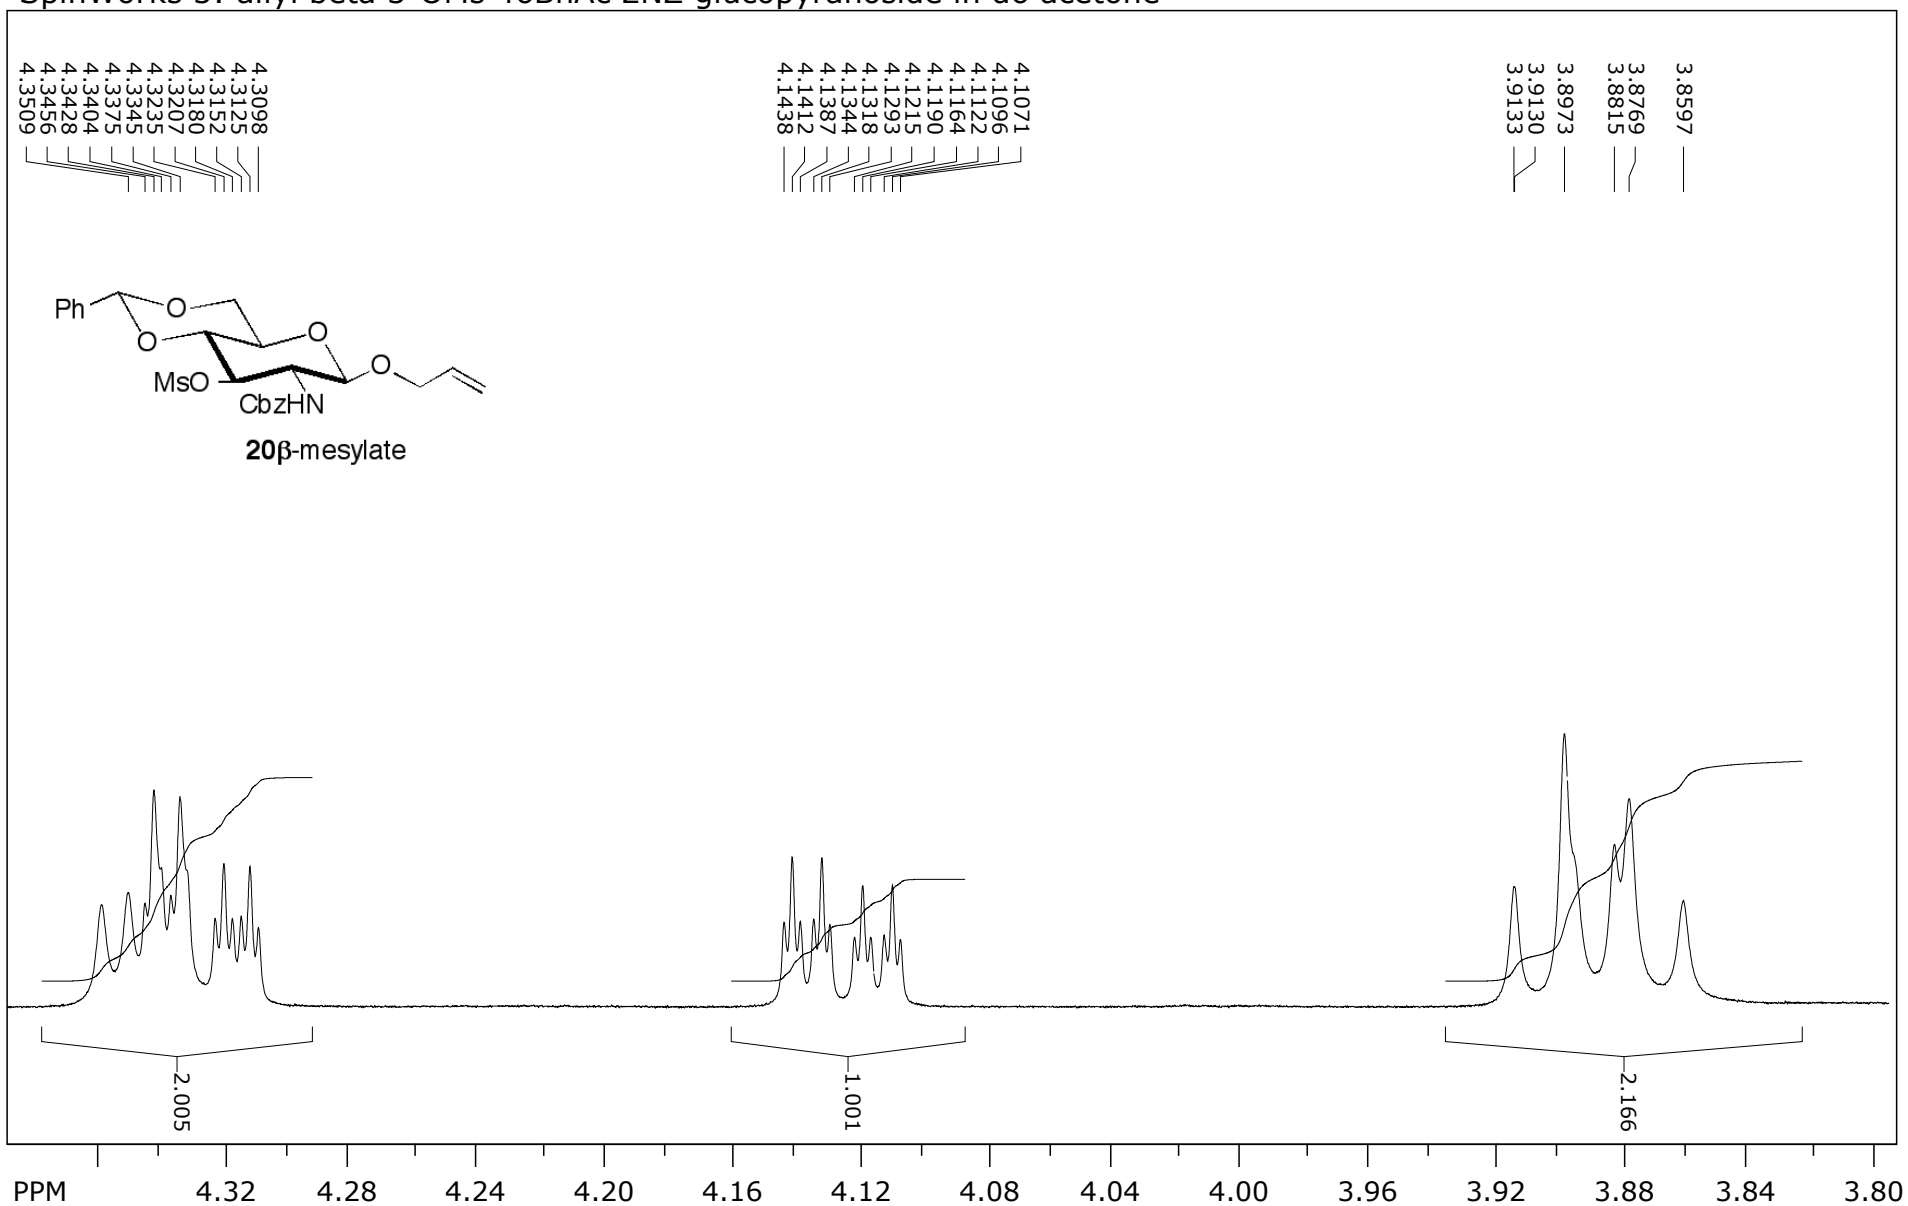

file: ...to process\BetaGlu3OMsd6Acet\1\fid expt: <zgpr>  
transmitter freq.: 600.553538 MHz  
time domain size: 65536 points  
width: 8417.51 Hz = 14.0162 ppm = 0.128441 Hz/pt  
number of scans: 32

freq. of 0 ppm: 600.550010 MHz  
processed size: 262144 complex points  
LB: 0.000 GF: 0.0000  
Hz/cm: 14.280 ppm/cm: 0.02378

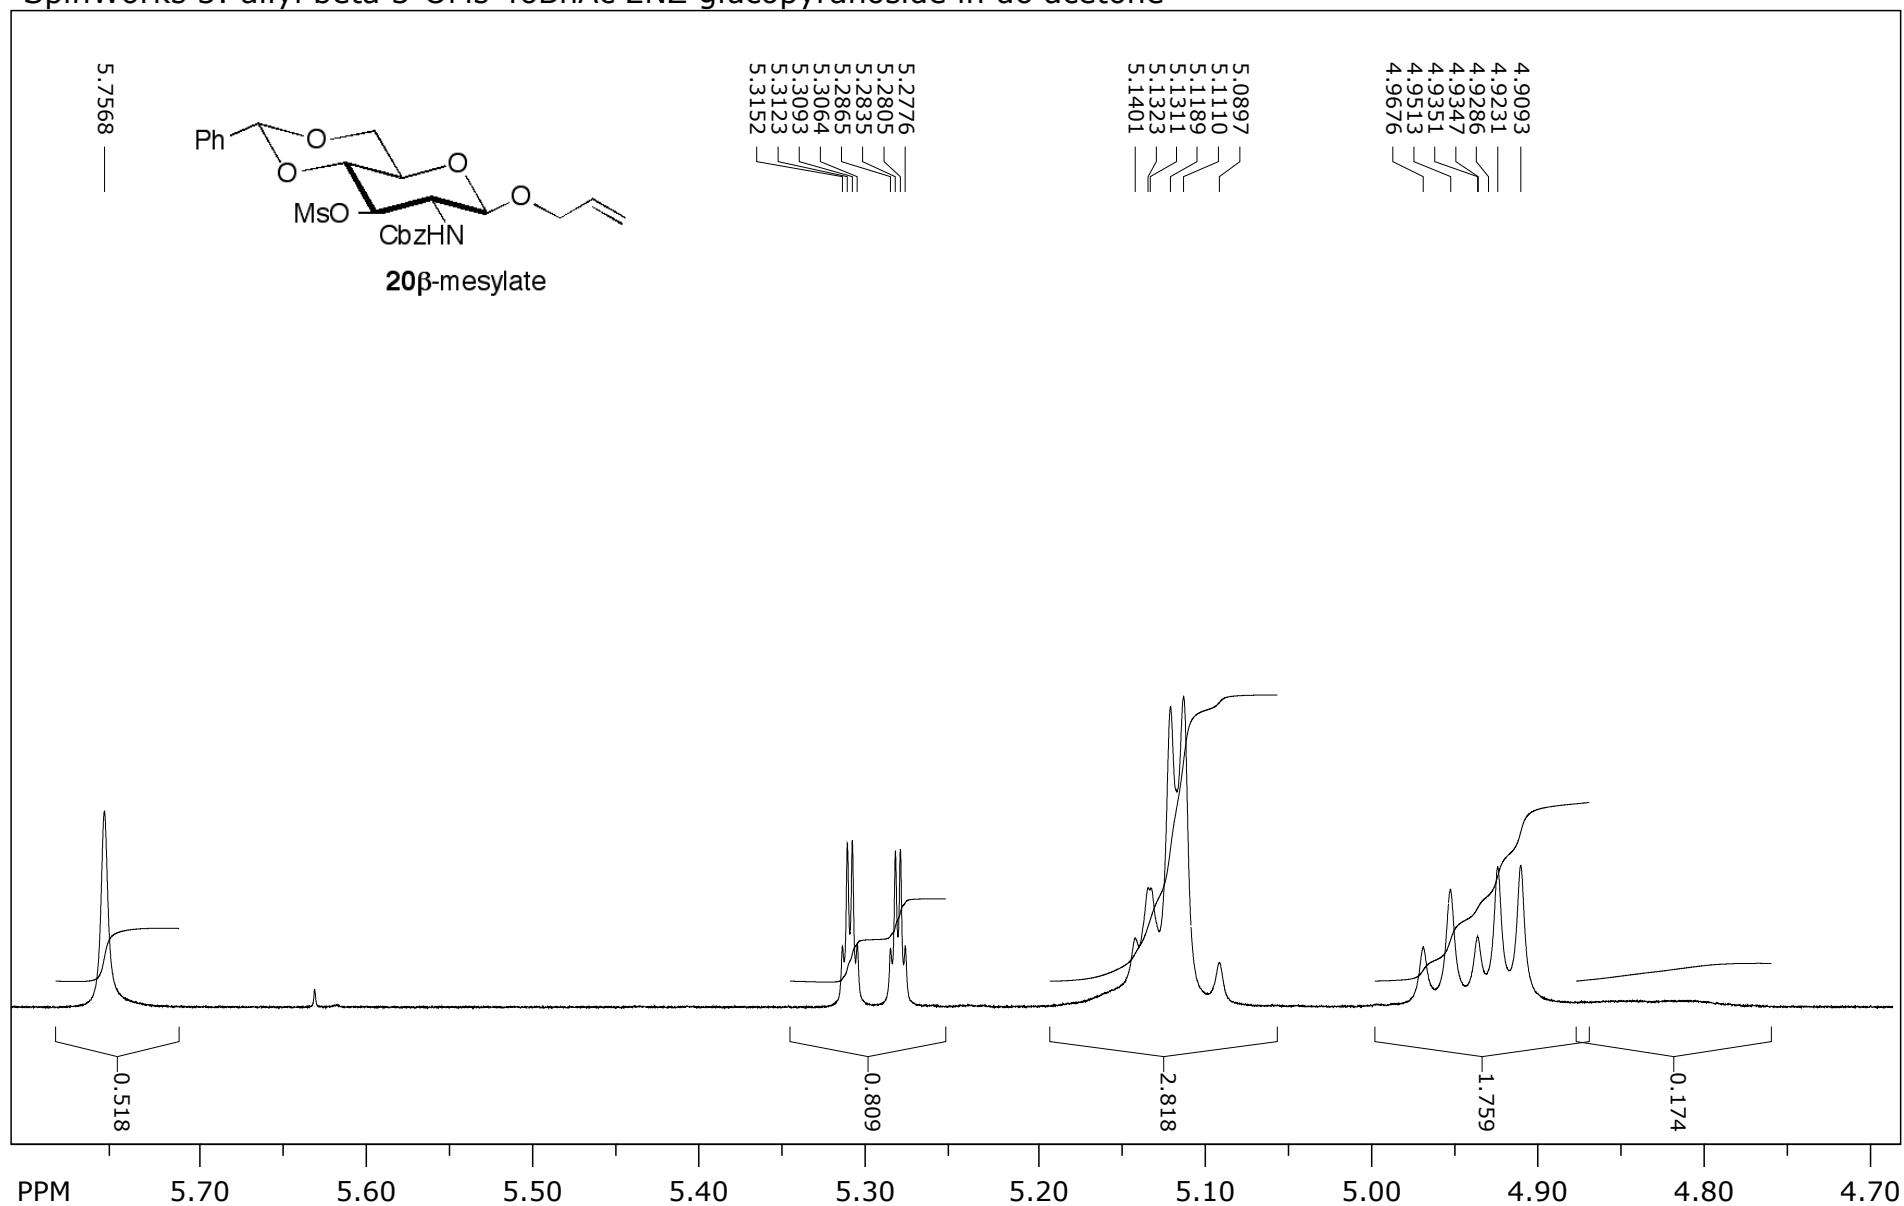

file: ...to process\BetaGlu3OMsd6Acet\1\fid expt: <zgpr>  
transmitter freq.: 600.553538 MHz  
time domain size: 65536 points  
width: 8417.51 Hz = 14.0162 ppm = 0.128441 Hz/pt  
number of scans: 32

freq. of 0 ppm: 600.550010 MHz  
processed size: 262144 complex points  
LB: 0.000 GF: 0.0000  
Hz/cm: 27.056 ppm/cm: 0.04505

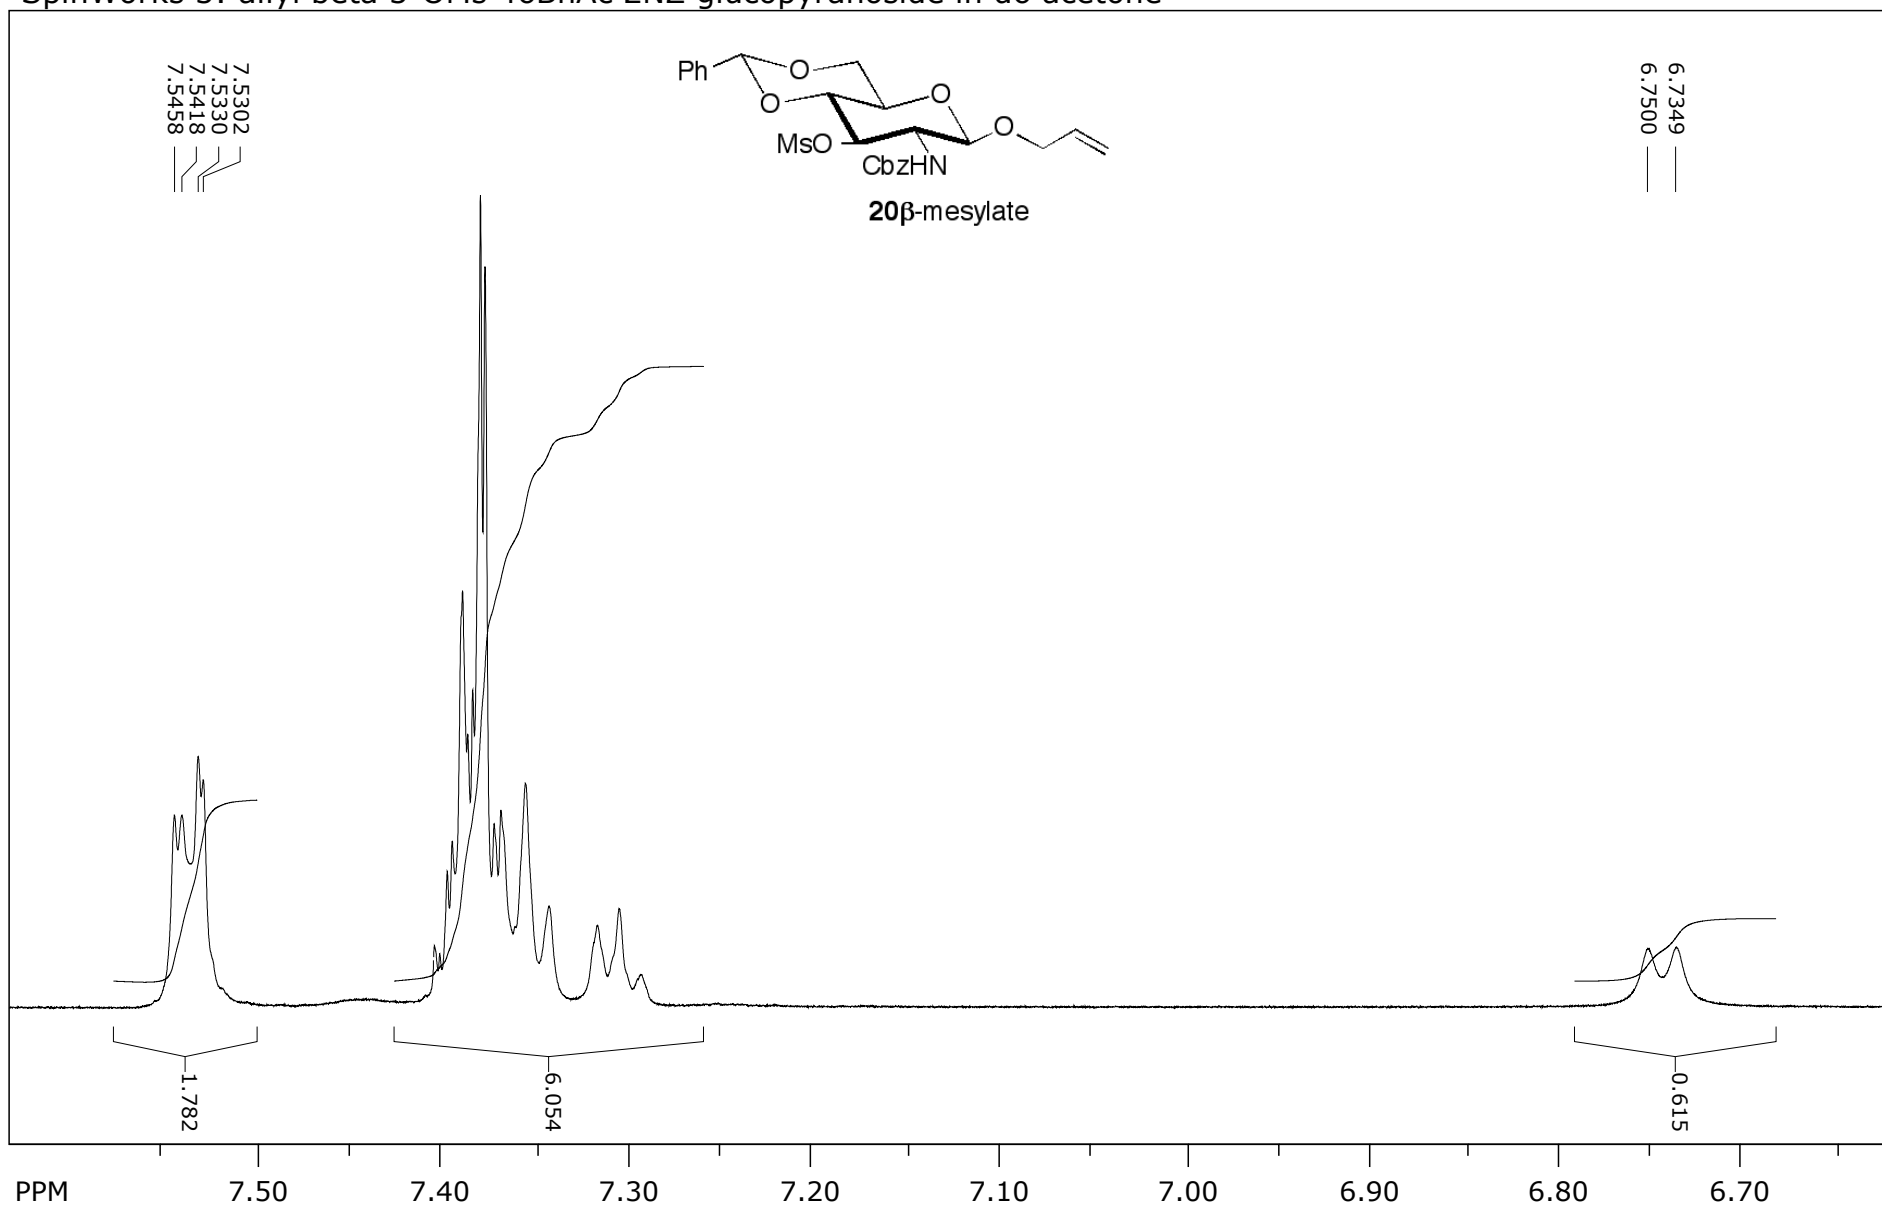

file: ...to process\BetaGlu3OMsd6Acet\1\fid expt: <zgpr>  
transmitter freq.: 600.553538 MHz  
time domain size: 65536 points  
width: 8417.51 Hz = 14.0162 ppm = 0.128441 Hz/pt  
number of scans: 32

freq. of 0 ppm: 600.550010 MHz  
processed size: 262144 complex points  
LB: 0.000 GF: 0.0000  
Hz/cm: 24.426 ppm/cm: 0.04067

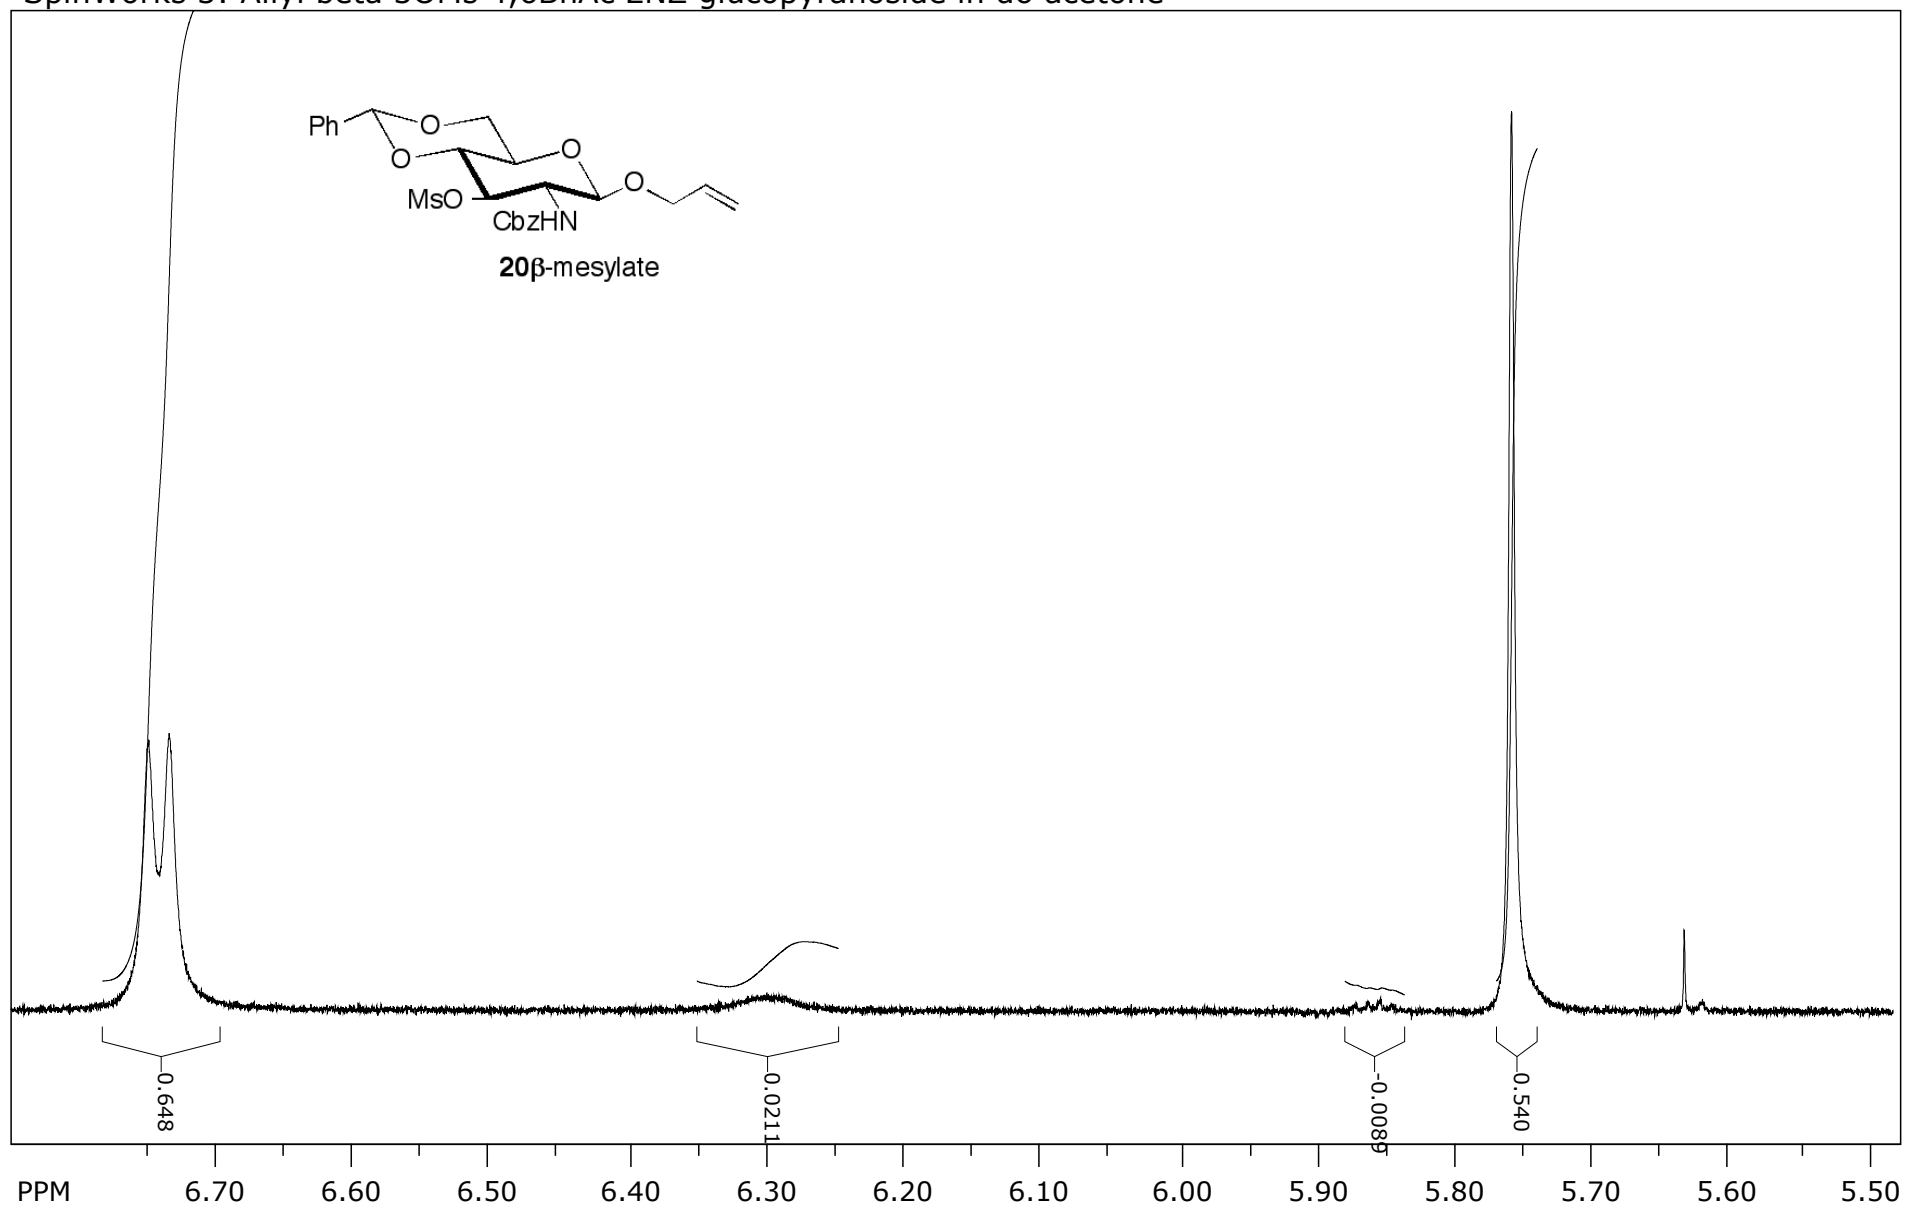

file: ...r\NMR Data\BetaGlu3OMsd6Acet\1\fid expt: <zgr>  
transmitter freq.: 600.553538 MHz  
time domain size: 65536 points  
width: 8417.51 Hz = 14.0162 ppm = 0.128441 Hz/pt  
number of scans: 32

freq. of 0 ppm: 600.550010 MHz  
processed size: 262144 complex points  
LB: 0.000 GF: 0.0000  
Hz/cm: 32.925 ppm/cm: 0.05482



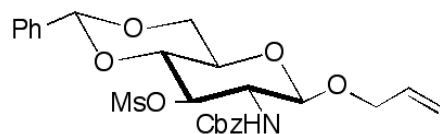in Acetone-*d*<sub>6</sub>

20β-mesylate

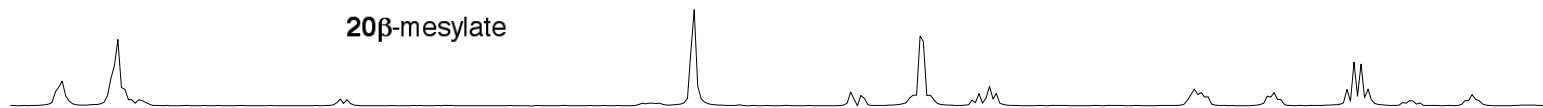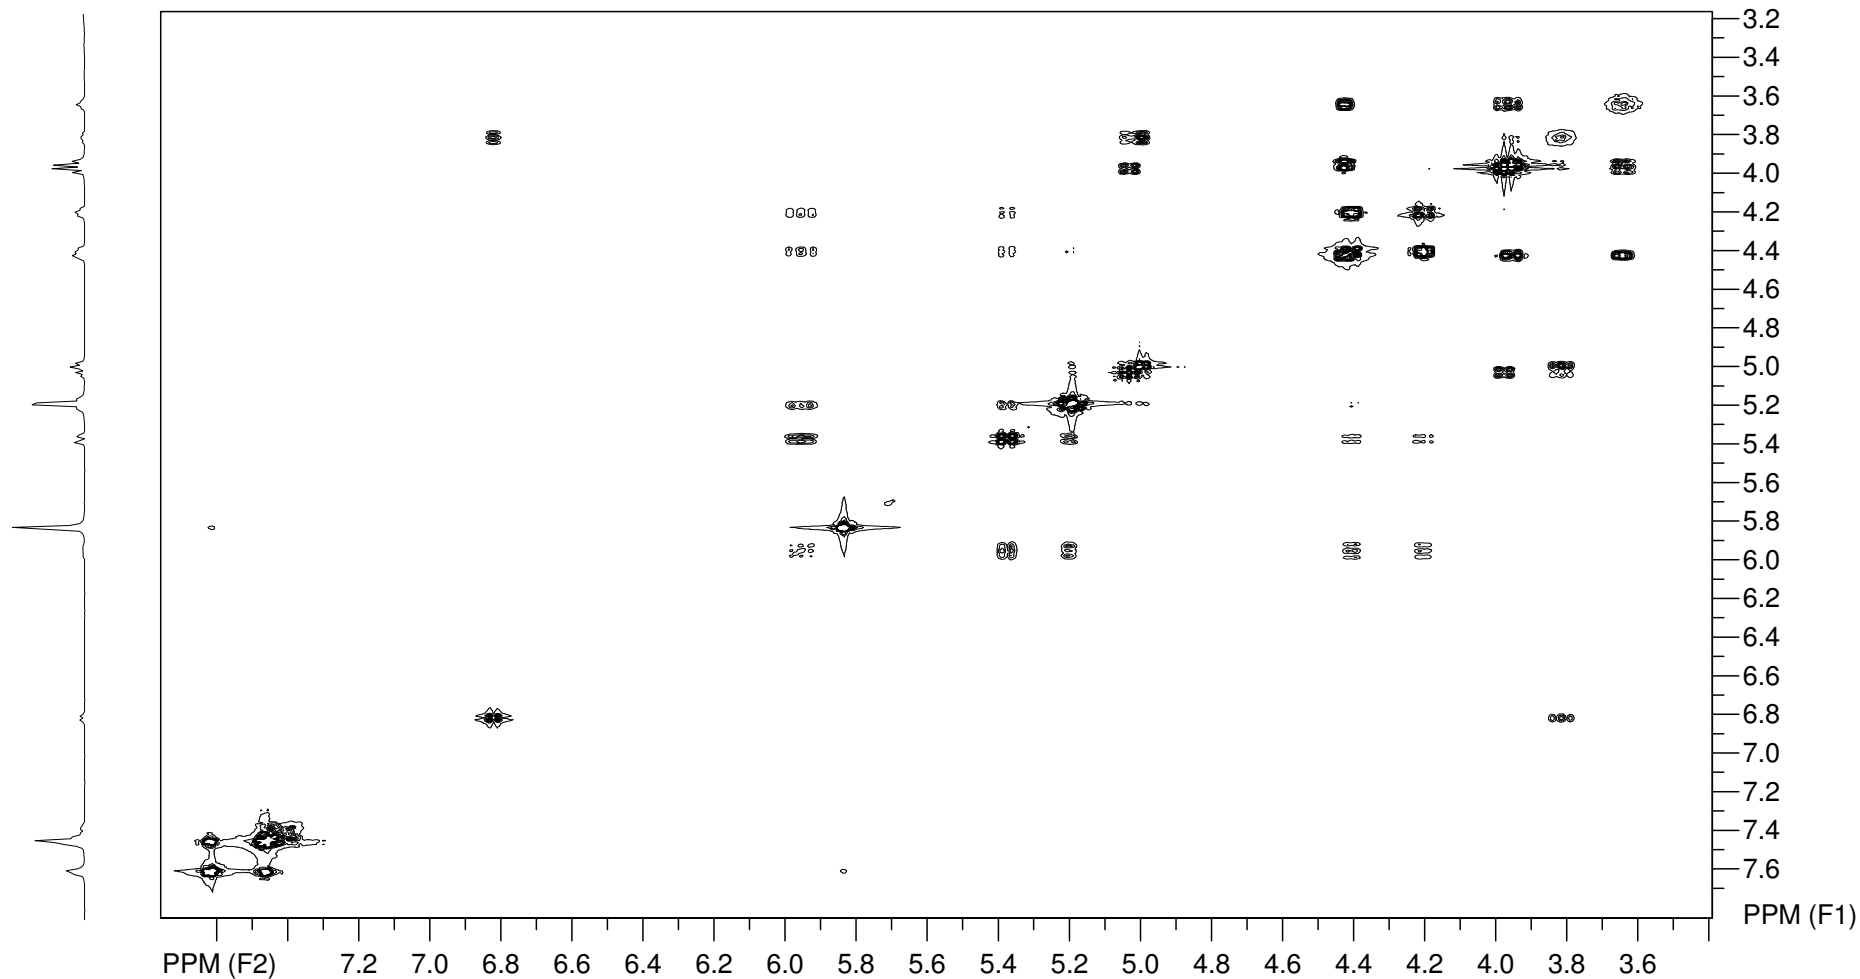

file: C:\Users\Jeff\Documents\NMR Folder\NMR Data\remaining to process\BetaGlu3OMsd6AcetCOSF2:\freq. of 0 ppm: 600.549962 MHz  
 transmitter freq.: 600.552832 MHz  
 time domain size: 2048 by 2048 points  
 width (F2): 6009.59 Hz = 10.006806 ppm = 2.934368 Hz/pt  
 number of scans: 2

processed size: 1024 complex points  
 window function: Sine  
 shift: 0.0 degrees  
 Hz/cm: 127.936 ppm/cm: 0.21303

F1: freq. of 0 ppm: 600.549962 MHz  
 processed size: 1024 complex points  
 window function: Sine  
 shift: 0.0 degrees  
 Hz/cm: 234.824 ppm/cm: 0.39101

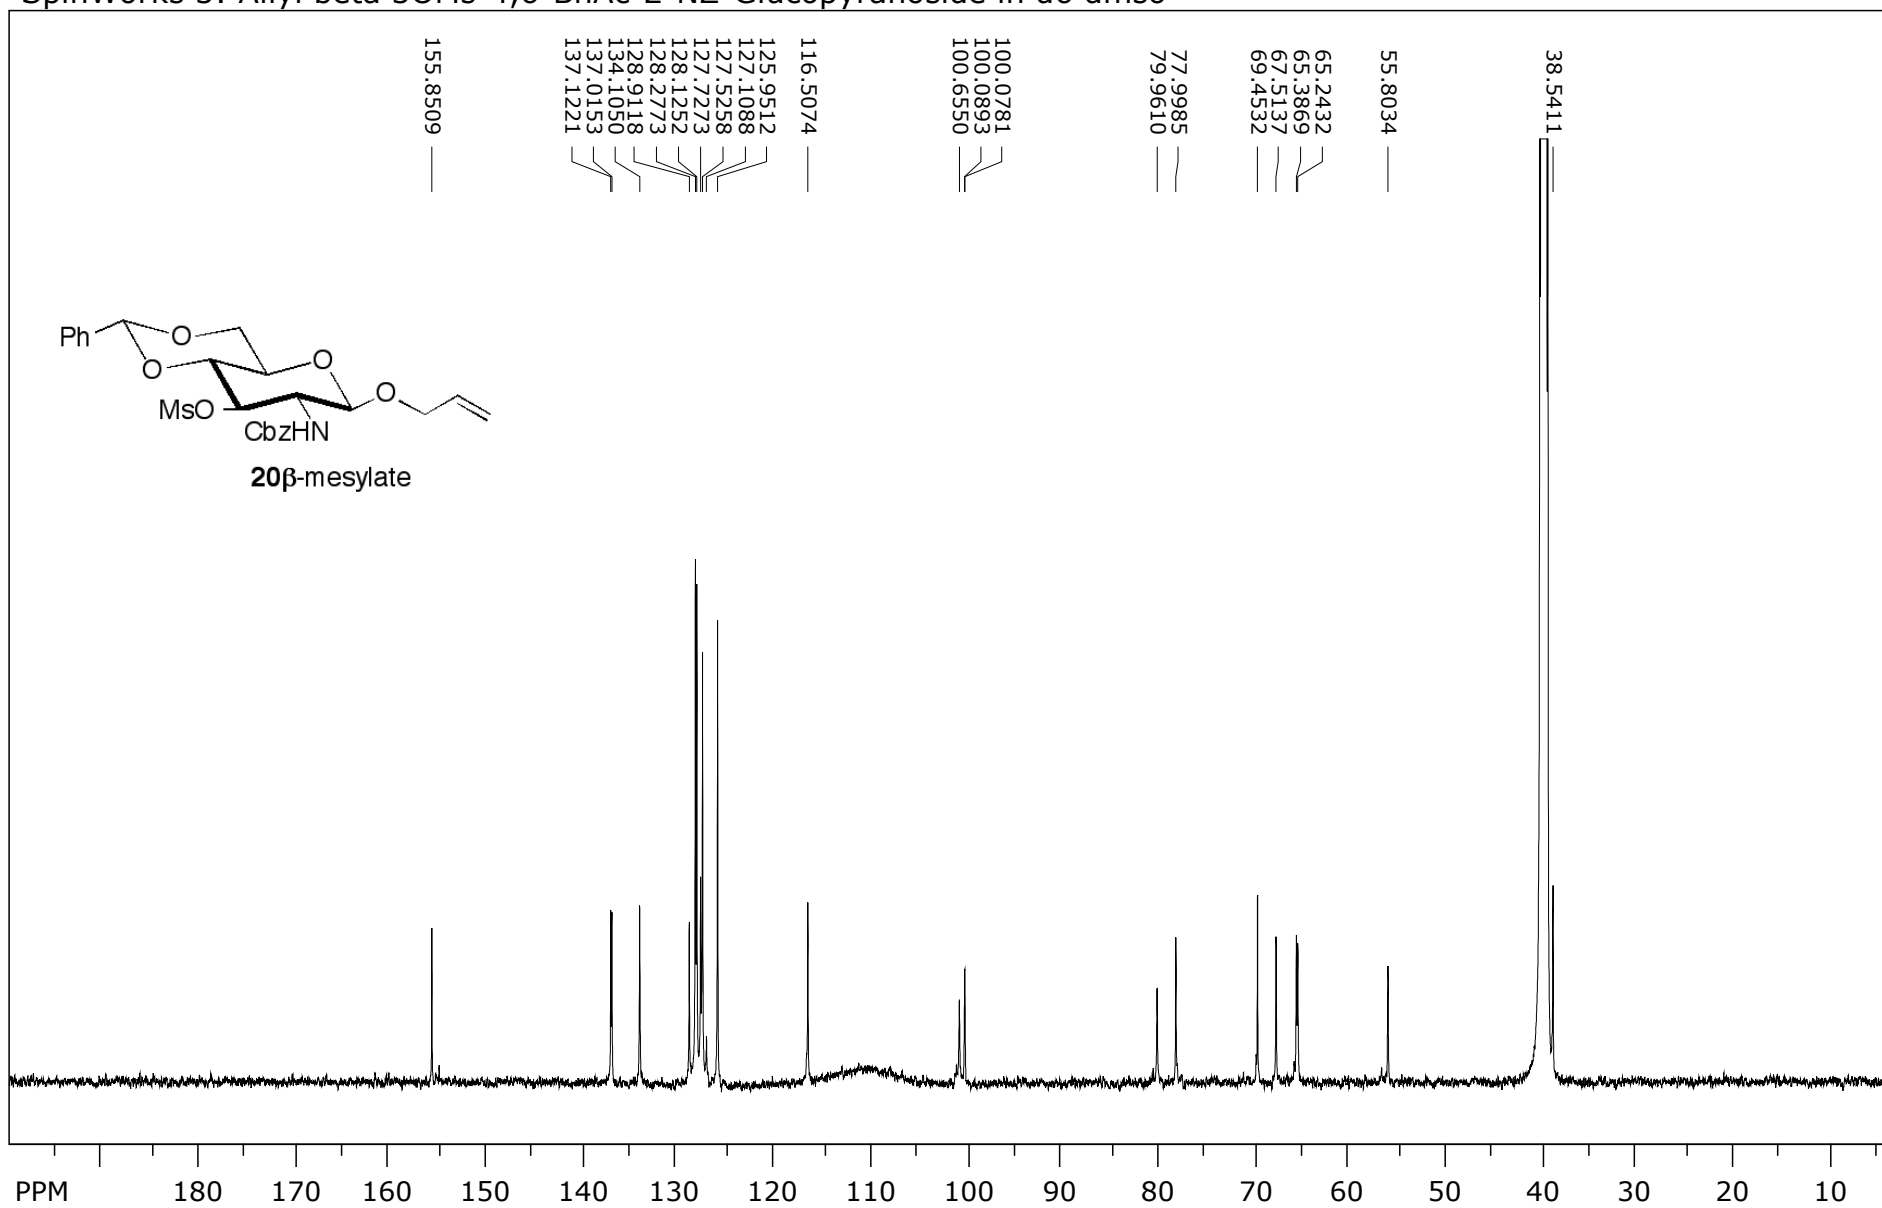

file: ...process\BetaGlu3OMsd6dms013C\1\fid expt: <zpgg30>  
transmitter freq.: 151.023519 MHz  
time domain size: 65536 points  
width: 36057.69 Hz = 238.7555 ppm = 0.550197 Hz/pt  
number of scans: 28672

freq. of 0 ppm: 151.008493 MHz  
processed size: 32768 complex points  
LB: 5.000 GF: 0.0000  
Hz/cm: 1189.582 ppm/cm: 7.87680

|               |                      |             |                      |                 |              |                        |                      |
|---------------|----------------------|-------------|----------------------|-----------------|--------------|------------------------|----------------------|
| Sample Name   | Sample10 redo        | Position    | Vial 5               | Instrument Name | Instrument 1 | User Name              | DYL                  |
| Inj Vol       | 3                    | InjPosition |                      | SampleType      | Unknown      | IRM Calibration Status | Some Ions Missed     |
| Data Filename | C18_Samp10Redo_Jeff. | ACQ Method  | C18 waters symmetry2 | Comment         |              | Acquired Time          | 9/20/2012 5:13:32 AM |

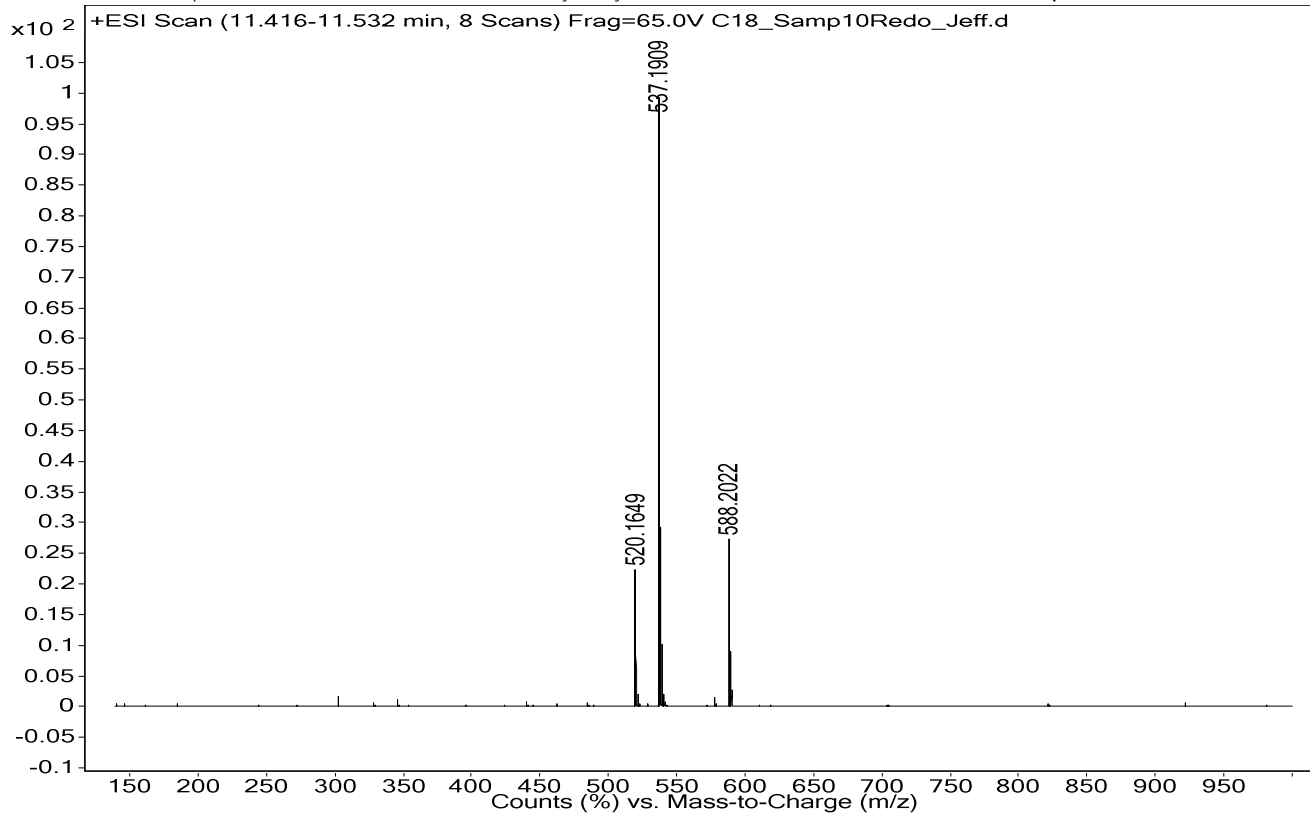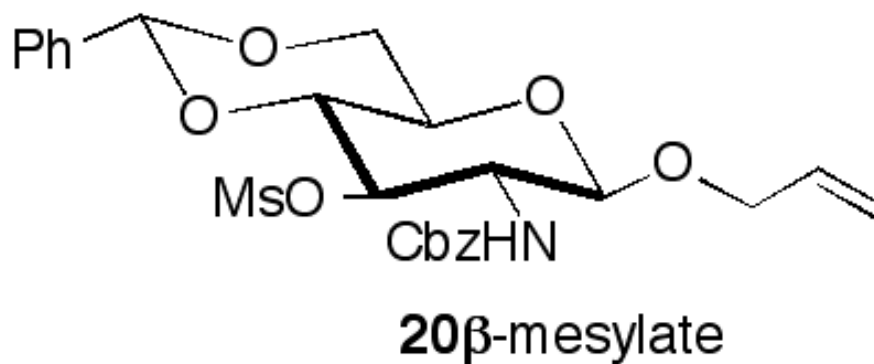

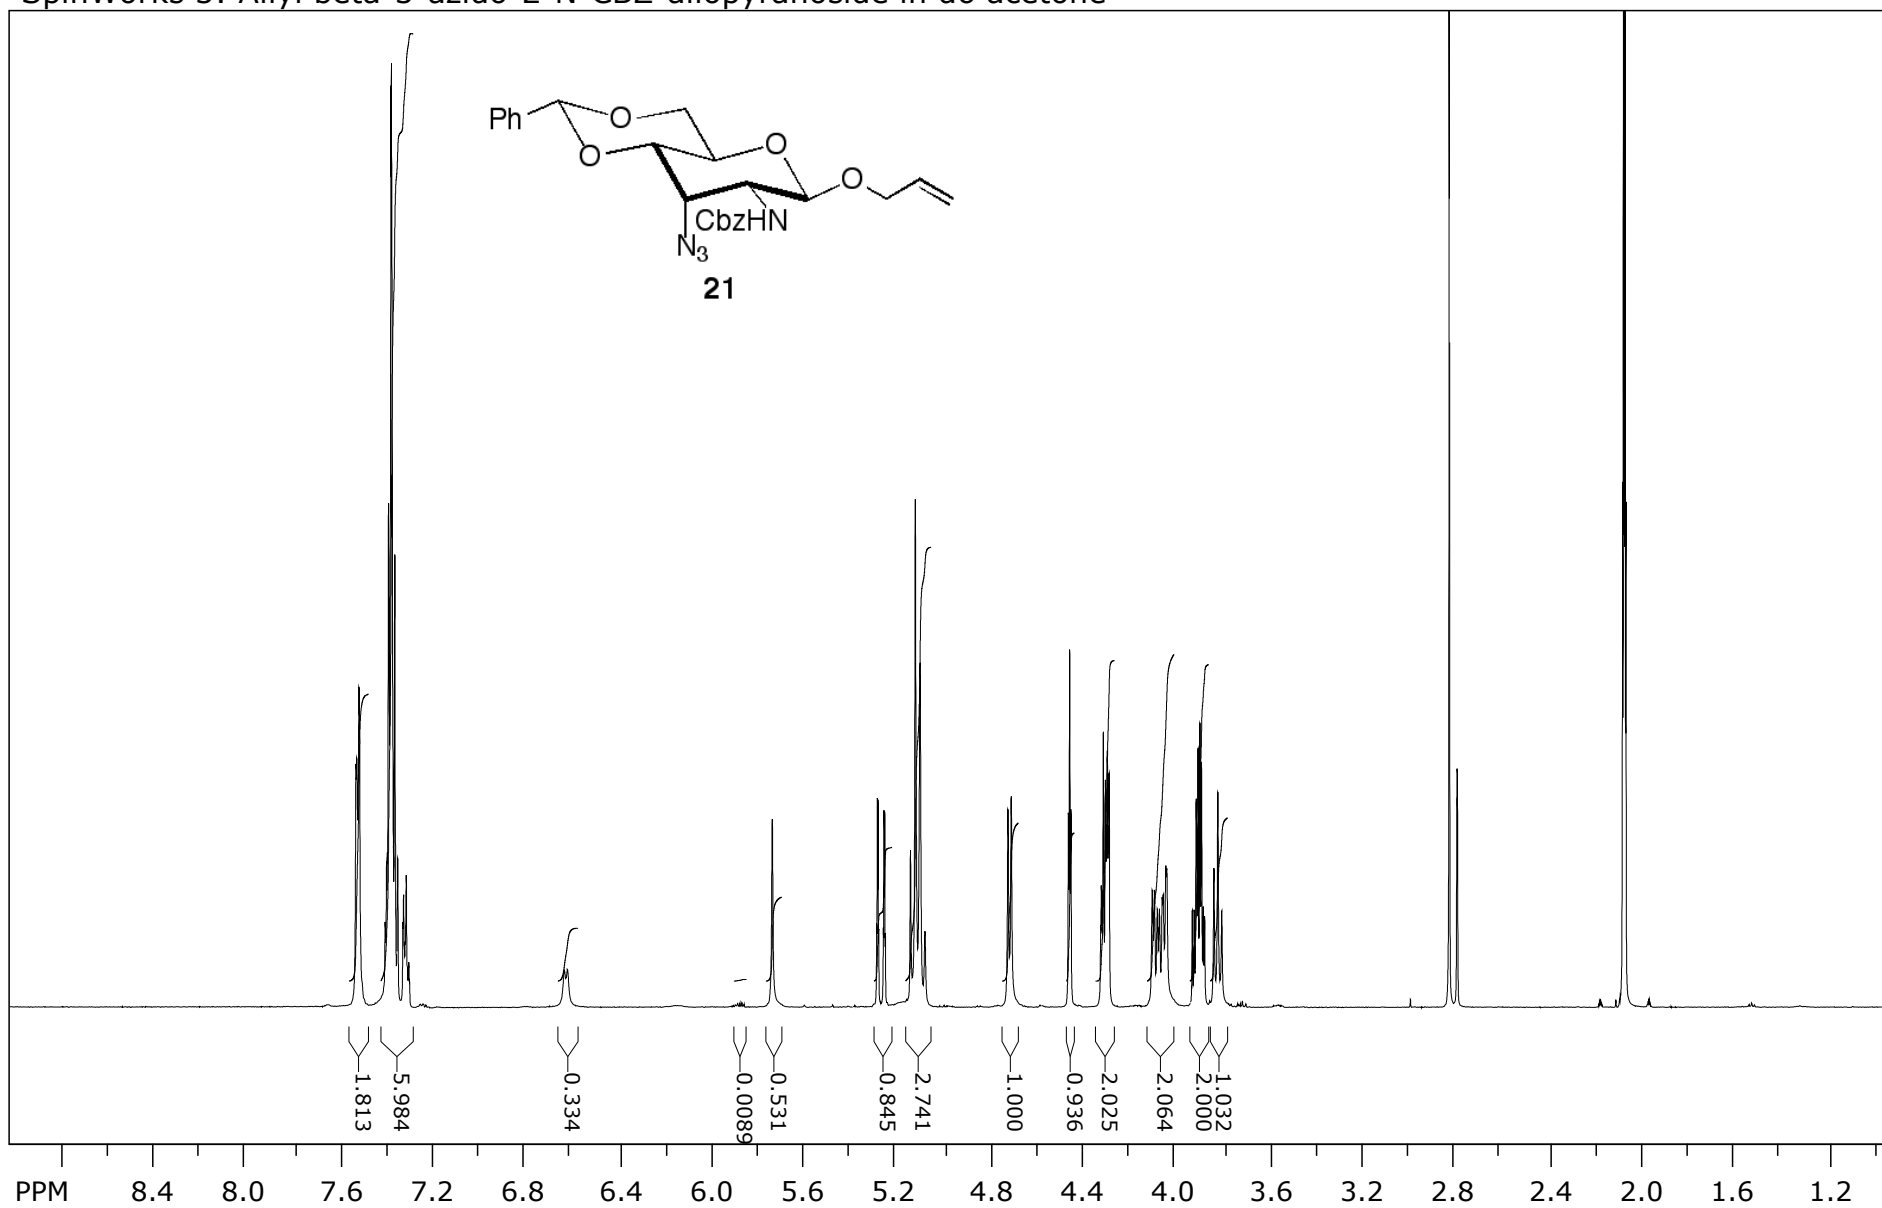

file: ...Data\b\_allo3N3BnAc\_d6acetone\1\fid exp: <zgpr>  
transmitter freq.: 600.553538 MHz  
time domain size: 65536 points  
width: 8417.51 Hz = 14.0162 ppm = 0.128441 Hz/pt  
number of scans: 32

freq. of 0 ppm: 600.550010 MHz  
processed size: 262144 complex points  
LB: 0.000 GF: 0.0000  
Hz/cm: 195.275 ppm/cm: 0.32516

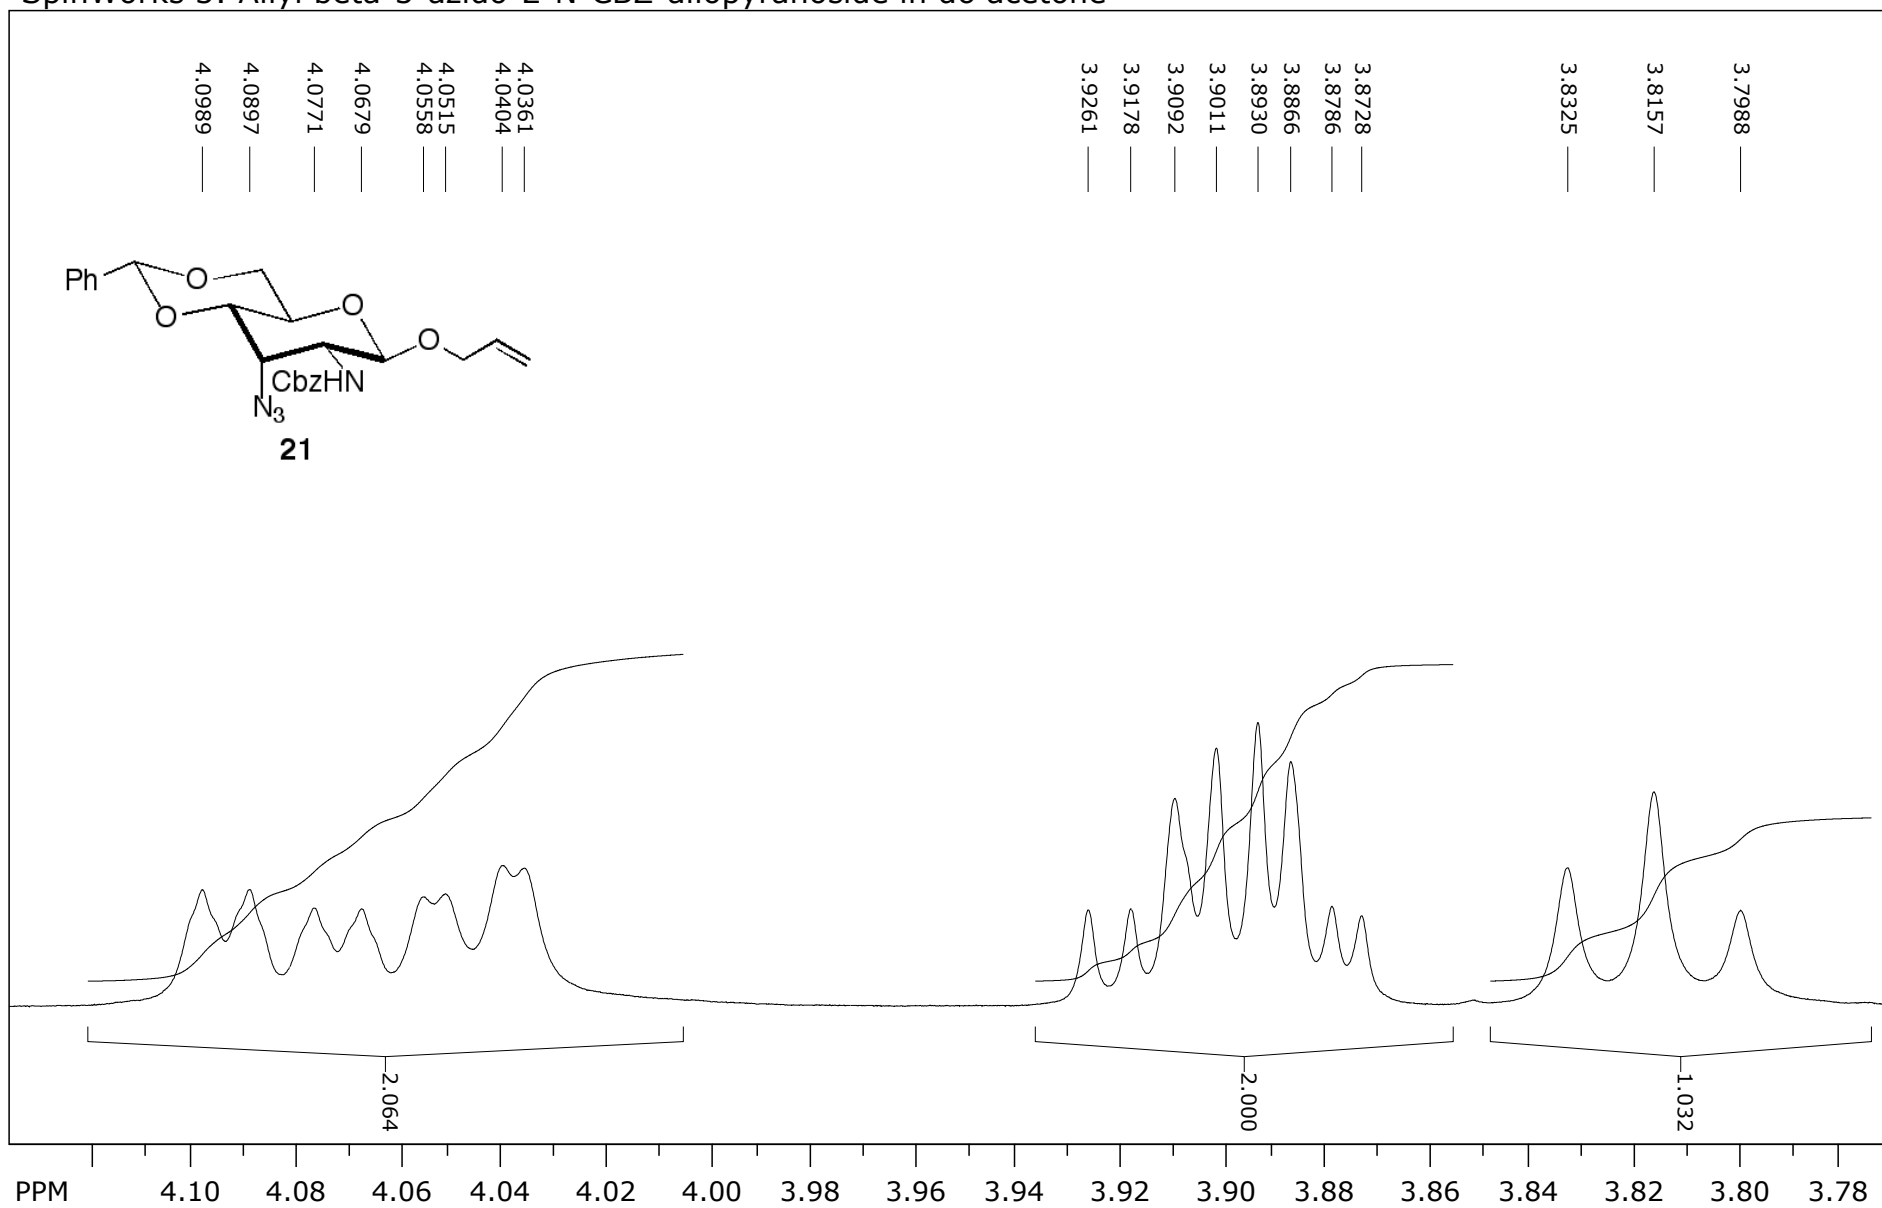

file: ...Data\b\_allo3N3BnAc\_d6acetone\1\fid exp: <zgpr>  
transmitter freq.: 600.553538 MHz  
time domain size: 65536 points  
width: 8417.51 Hz = 14.0162 ppm = 0.128441 Hz/pt  
number of scans: 32

freq. of 0 ppm: 600.550010 MHz  
processed size: 262144 complex points  
LB: 0.000 GF: 0.0000  
Hz/cm: 8.821 ppm/cm: 0.01469

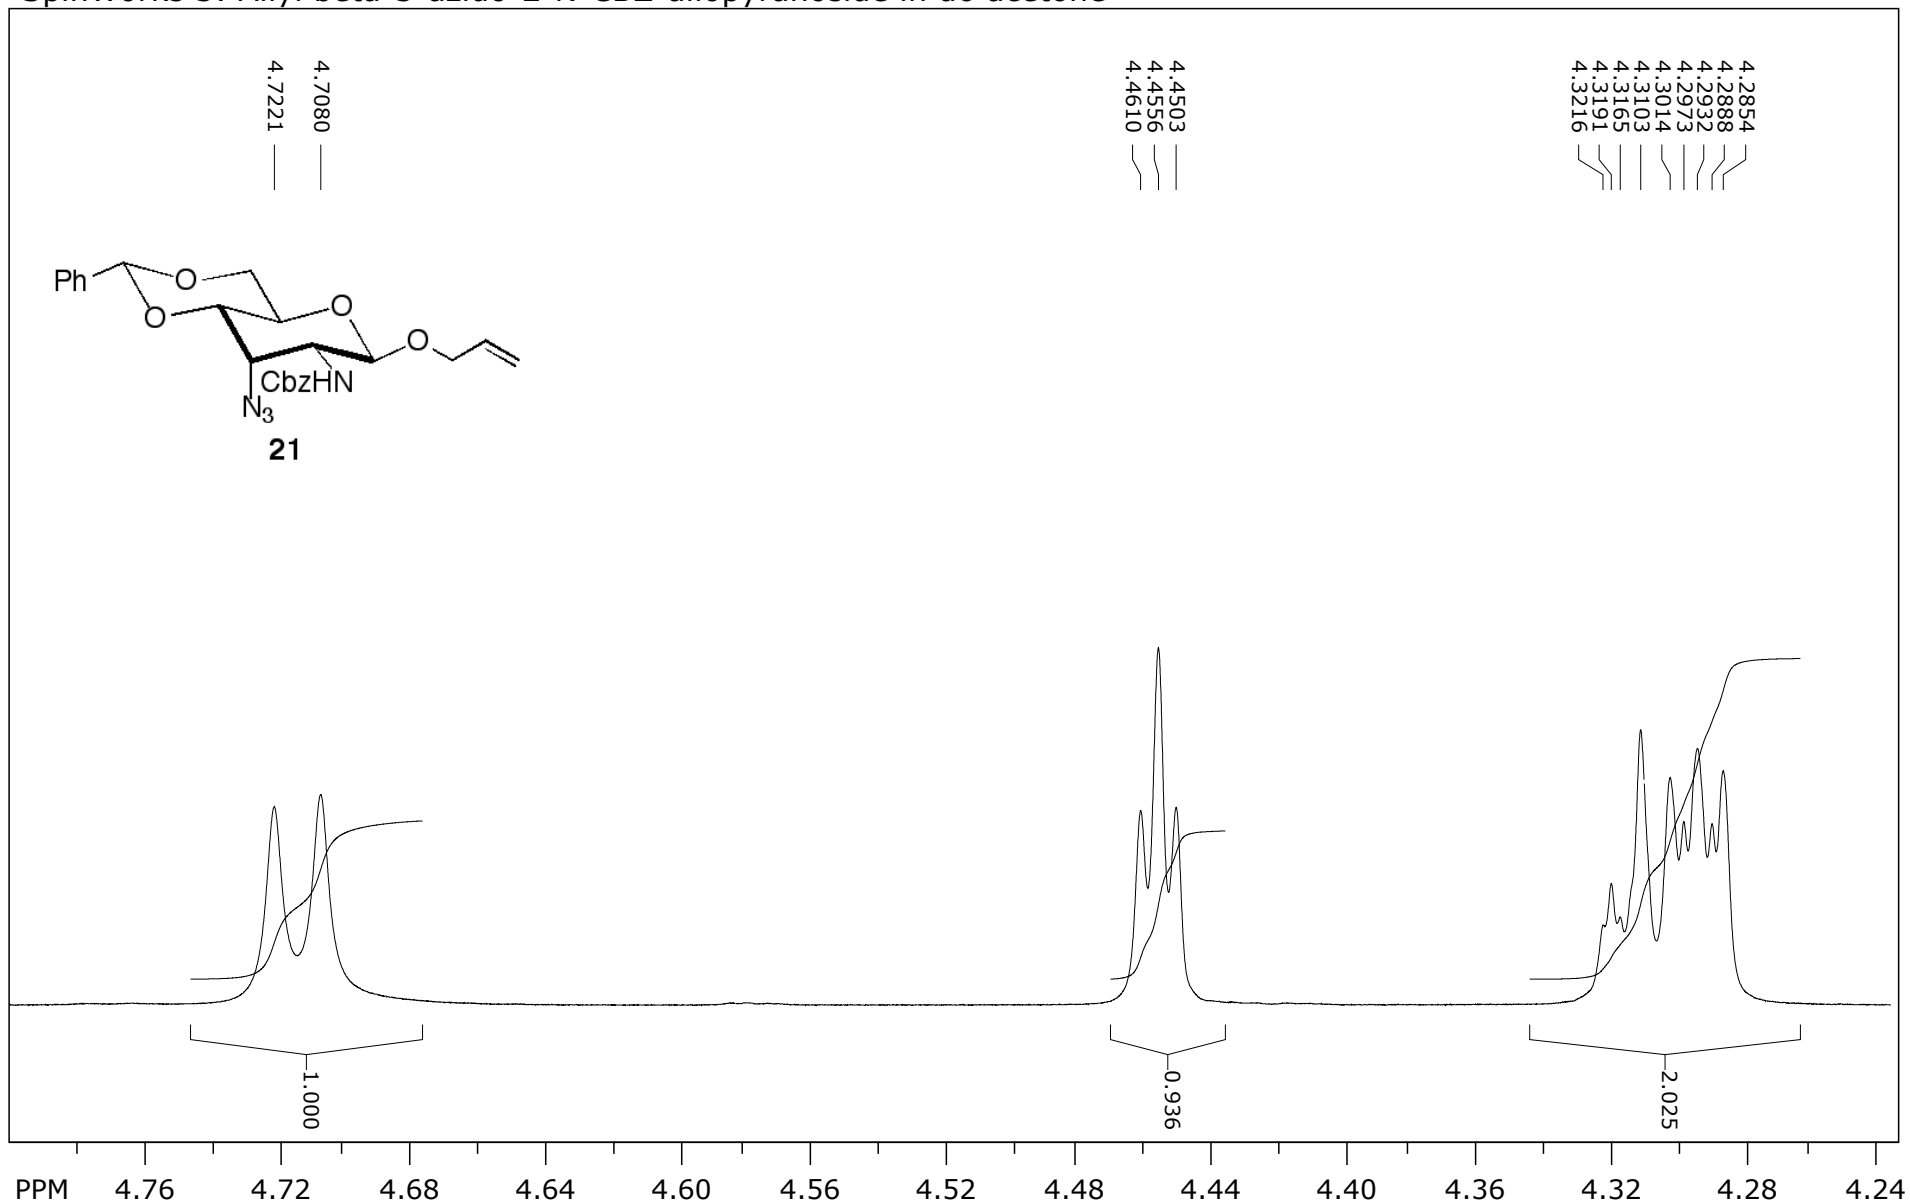

file: ...Data\b\_allo3N3BnAc\_d6acetone\1\fid exp: <zgpr>  
transmitter freq.: 600.553538 MHz  
time domain size: 65536 points  
width: 8417.51 Hz = 14.0162 ppm = 0.128441 Hz/pt  
number of scans: 32

freq. of 0 ppm: 600.550010 MHz  
processed size: 262144 complex points  
LB: 0.000 GF: 0.0000  
Hz/cm: 13.625 ppm/cm: 0.02269

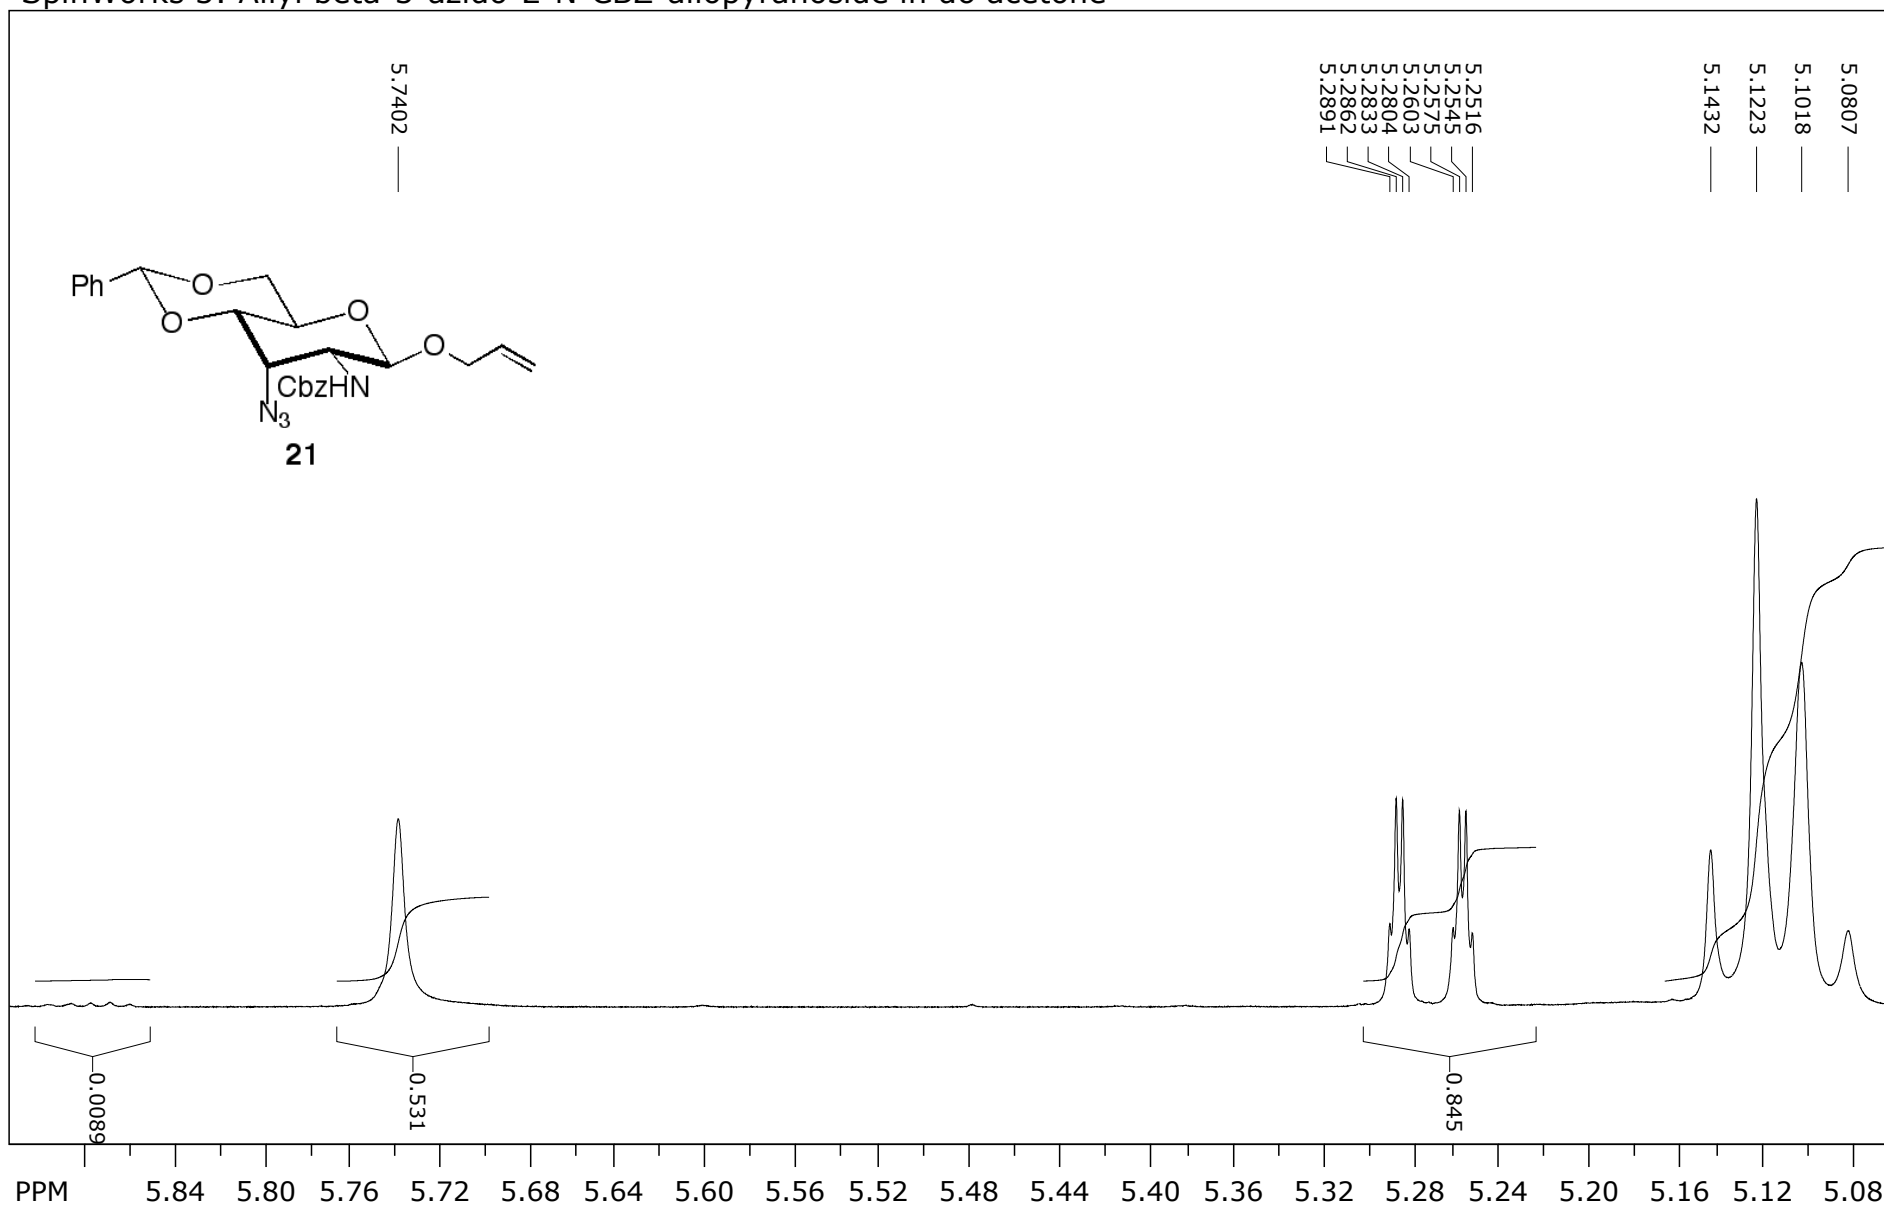

file: ...Data\b\_allo3N3BnAc\_d6acetone\1\fid expt: <zgpr>  
transmitter freq.: 600.553538 MHz  
time domain size: 65536 points  
width: 8417.51 Hz = 14.0162 ppm = 0.128441 Hz/pt  
number of scans: 32

freq. of 0 ppm: 600.550010 MHz  
processed size: 262144 complex points  
LB: 0.000 GF: 0.0000  
Hz/cm: 20.565 ppm/cm: 0.03424

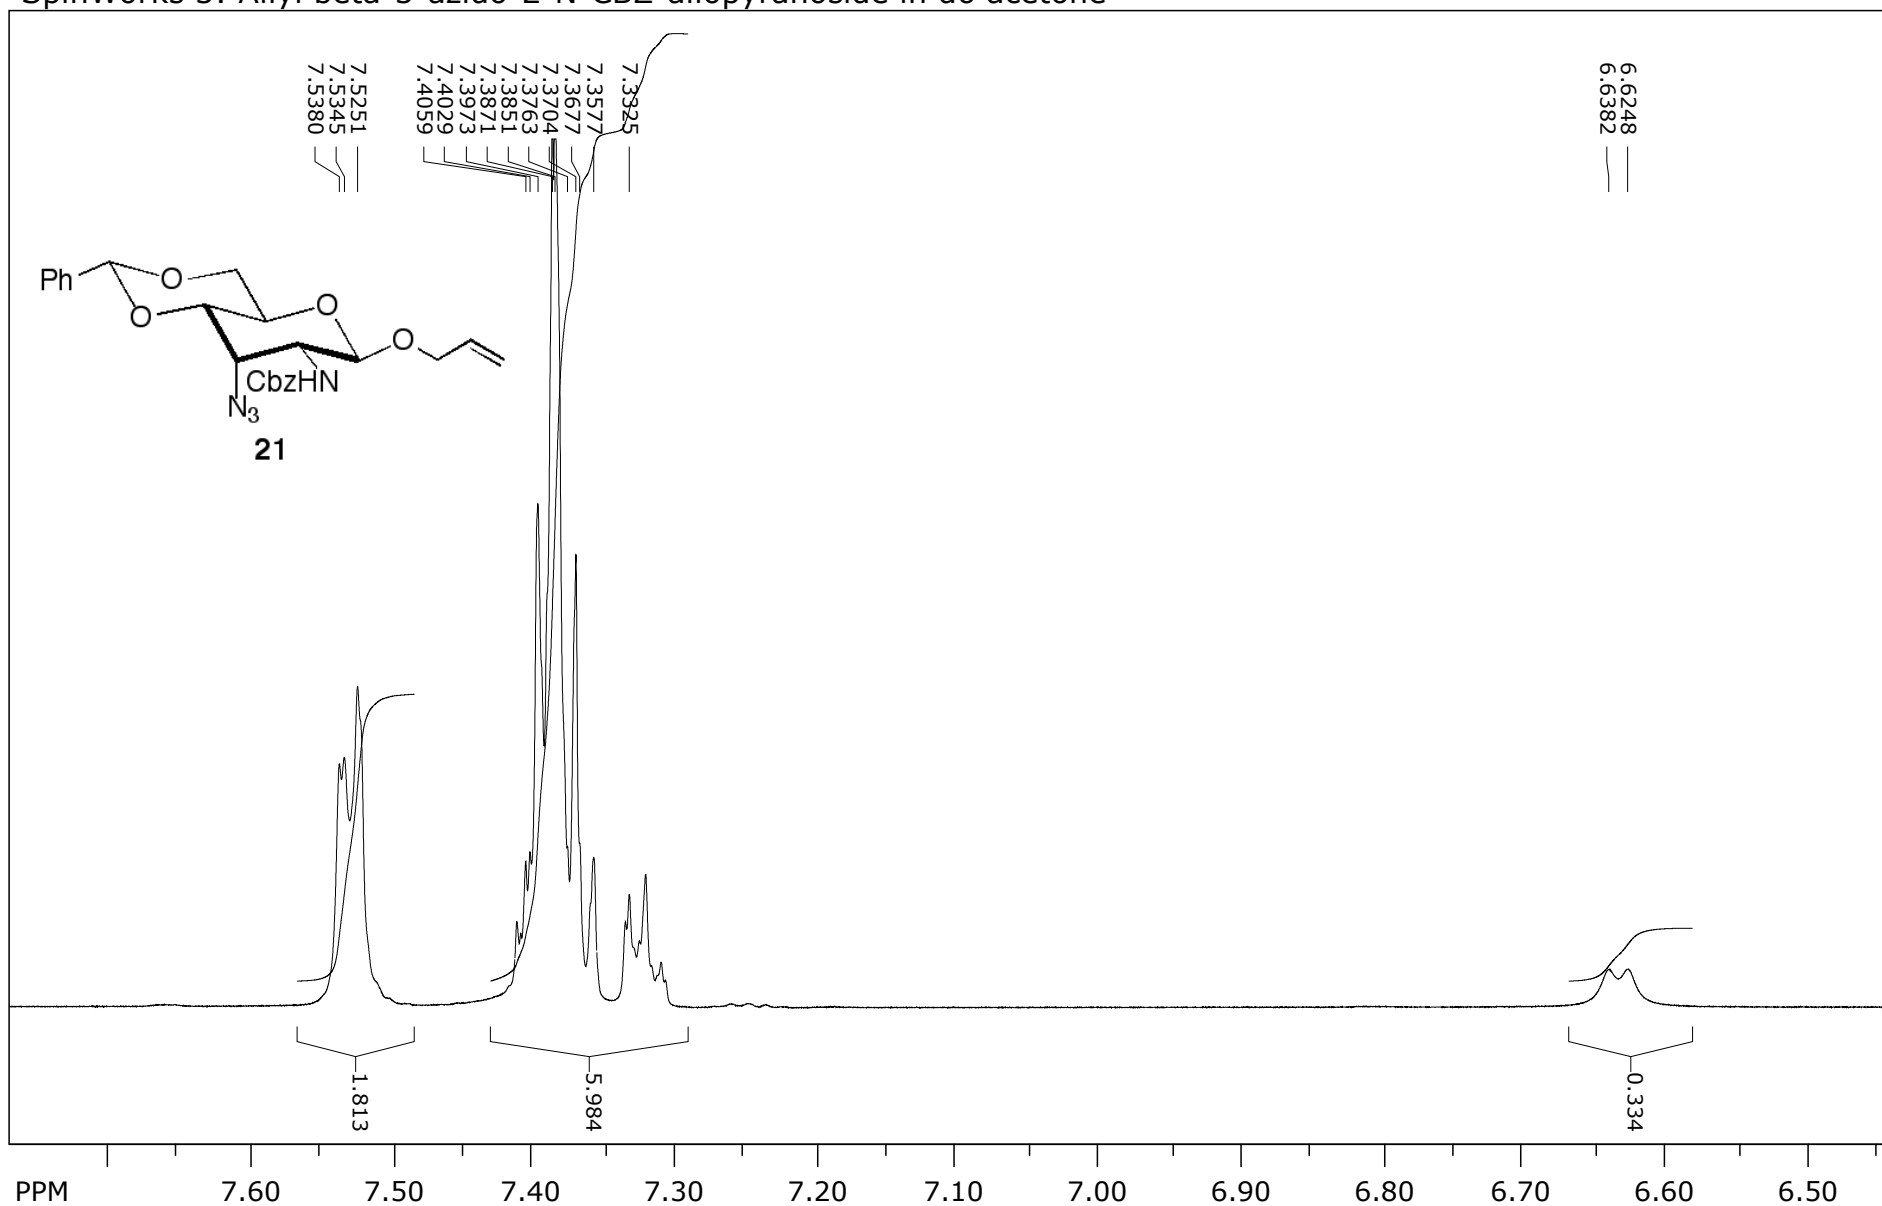

file: ...Data\b\_allo3N3BnAc\_d6acetone\1\fid expt: <zgpr>  
transmitter freq.: 600.553538 MHz  
time domain size: 65536 points  
width: 8417.51 Hz = 14.0162 ppm = 0.128441 Hz/pt  
number of scans: 32

freq. of 0 ppm: 600.550010 MHz  
processed size: 262144 complex points  
LB: 0.000 GF: 0.0000  
Hz/cm: 32.049 ppm/cm: 0.05337



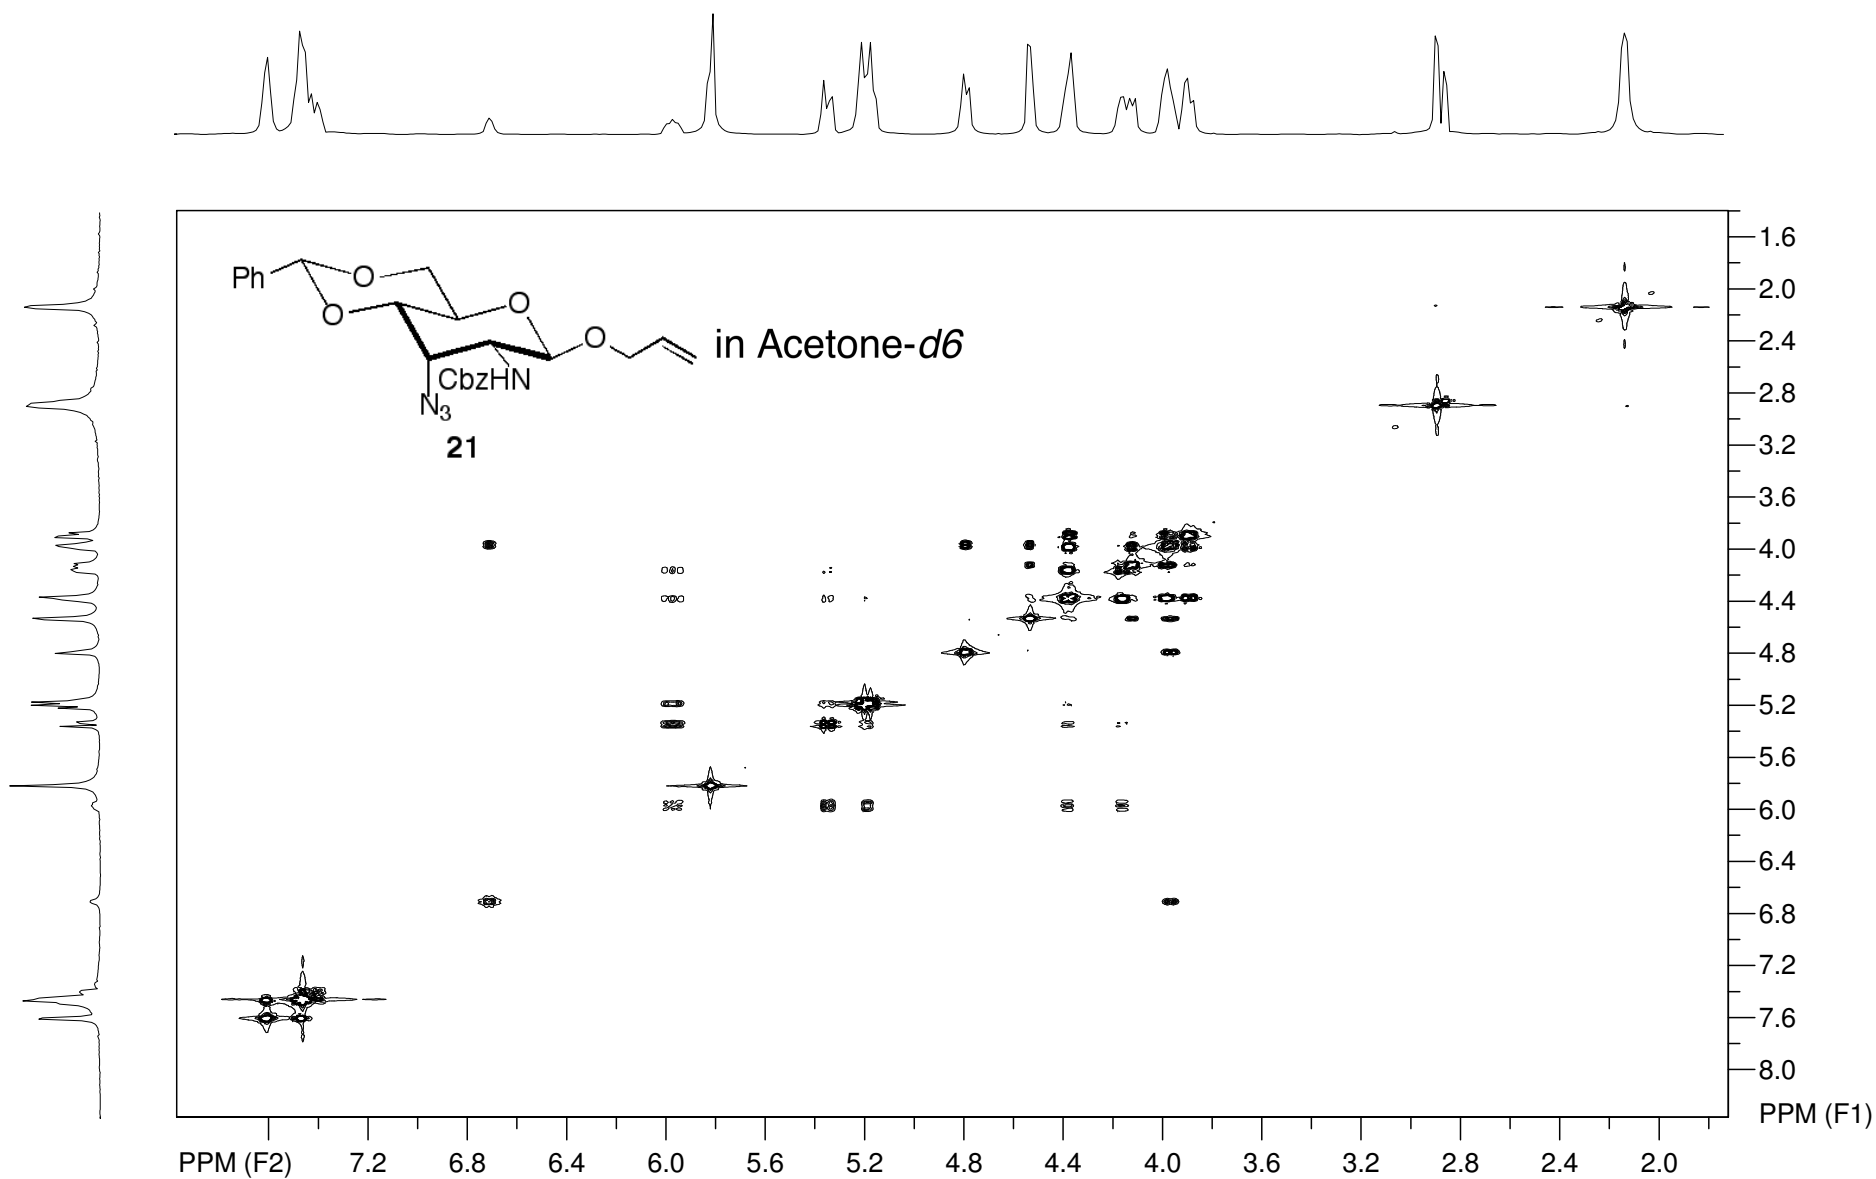

file: C:\Users\Jeff\Documents\NMR Folder\NMR Data\b\_allo3N3BnAc\_COSY\1\ser  
 transmitter freq.: 600.552832 MHz  
 time domain size: 2048 by 2048 points  
 width (F2): 7211.50 Hz = 12.008167 ppm = 3.521242 Hz/pt  
 number of scans: 2

expt: <cosygpqf>F2: freq. of 0 ppm: 600.549962 MHz  
 processed size: 1024 complex points  
 window function: Sine  
 shift: 0.0 degrees  
 Hz/cm: 183.086 ppm/cm: 0.30486

F1: freq. of 0 ppm: 600.549962 MHz  
 processed size: 1024 complex points  
 window function: Sine  
 shift: 0.0 degrees  
 Hz/cm: 348.739 ppm/cm: 0.58070

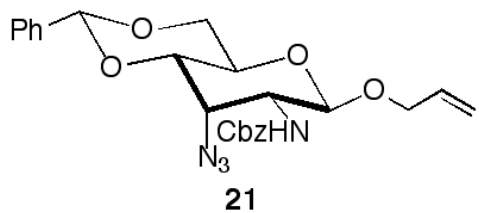

in Acetone-*d*6

S-36

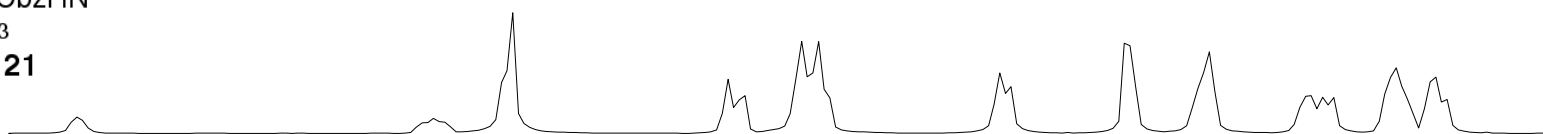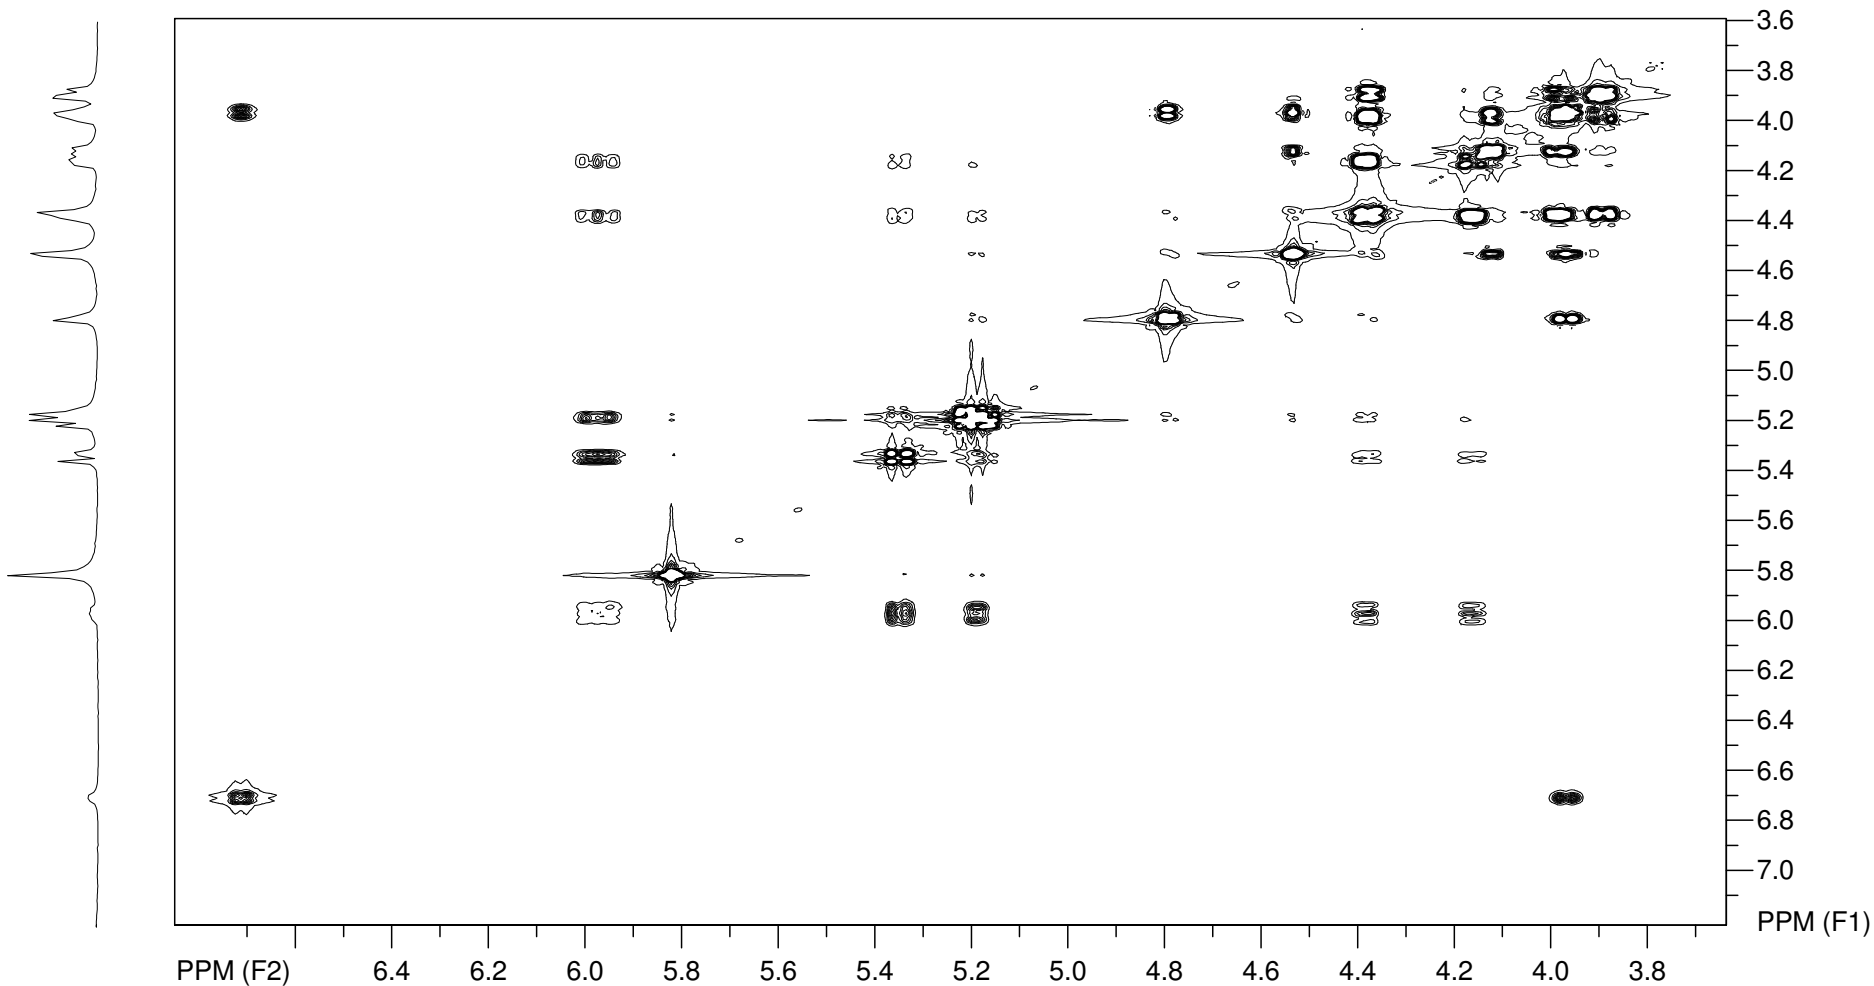

file: C:\Users\Jeff\Documents\NMR Folder\NMR Data\b\_allo3N3BnAc\_COSY\1\ser  
 transmitter freq.: 600.552832 MHz  
 time domain size: 2048 by 2048 points  
 width (F2): 7211.50 Hz = 12.008167 ppm = 3.521242 Hz/pt  
 number of scans: 2

expt: <cosygpqf>F2: freq. of 0 ppm: 600.549962 MHz  
 processed size: 1024 complex points  
 window function: Sine  
 shift: 0.0 degrees  
 Hz/cm: 94.136 ppm/cm: 0.15675

F1: freq. of 0 ppm: 600.549962 MHz  
 processed size: 1024 complex points  
 window function: Sine  
 shift: 0.0 degrees  
 Hz/cm: 181.543 ppm/cm: 0.30229

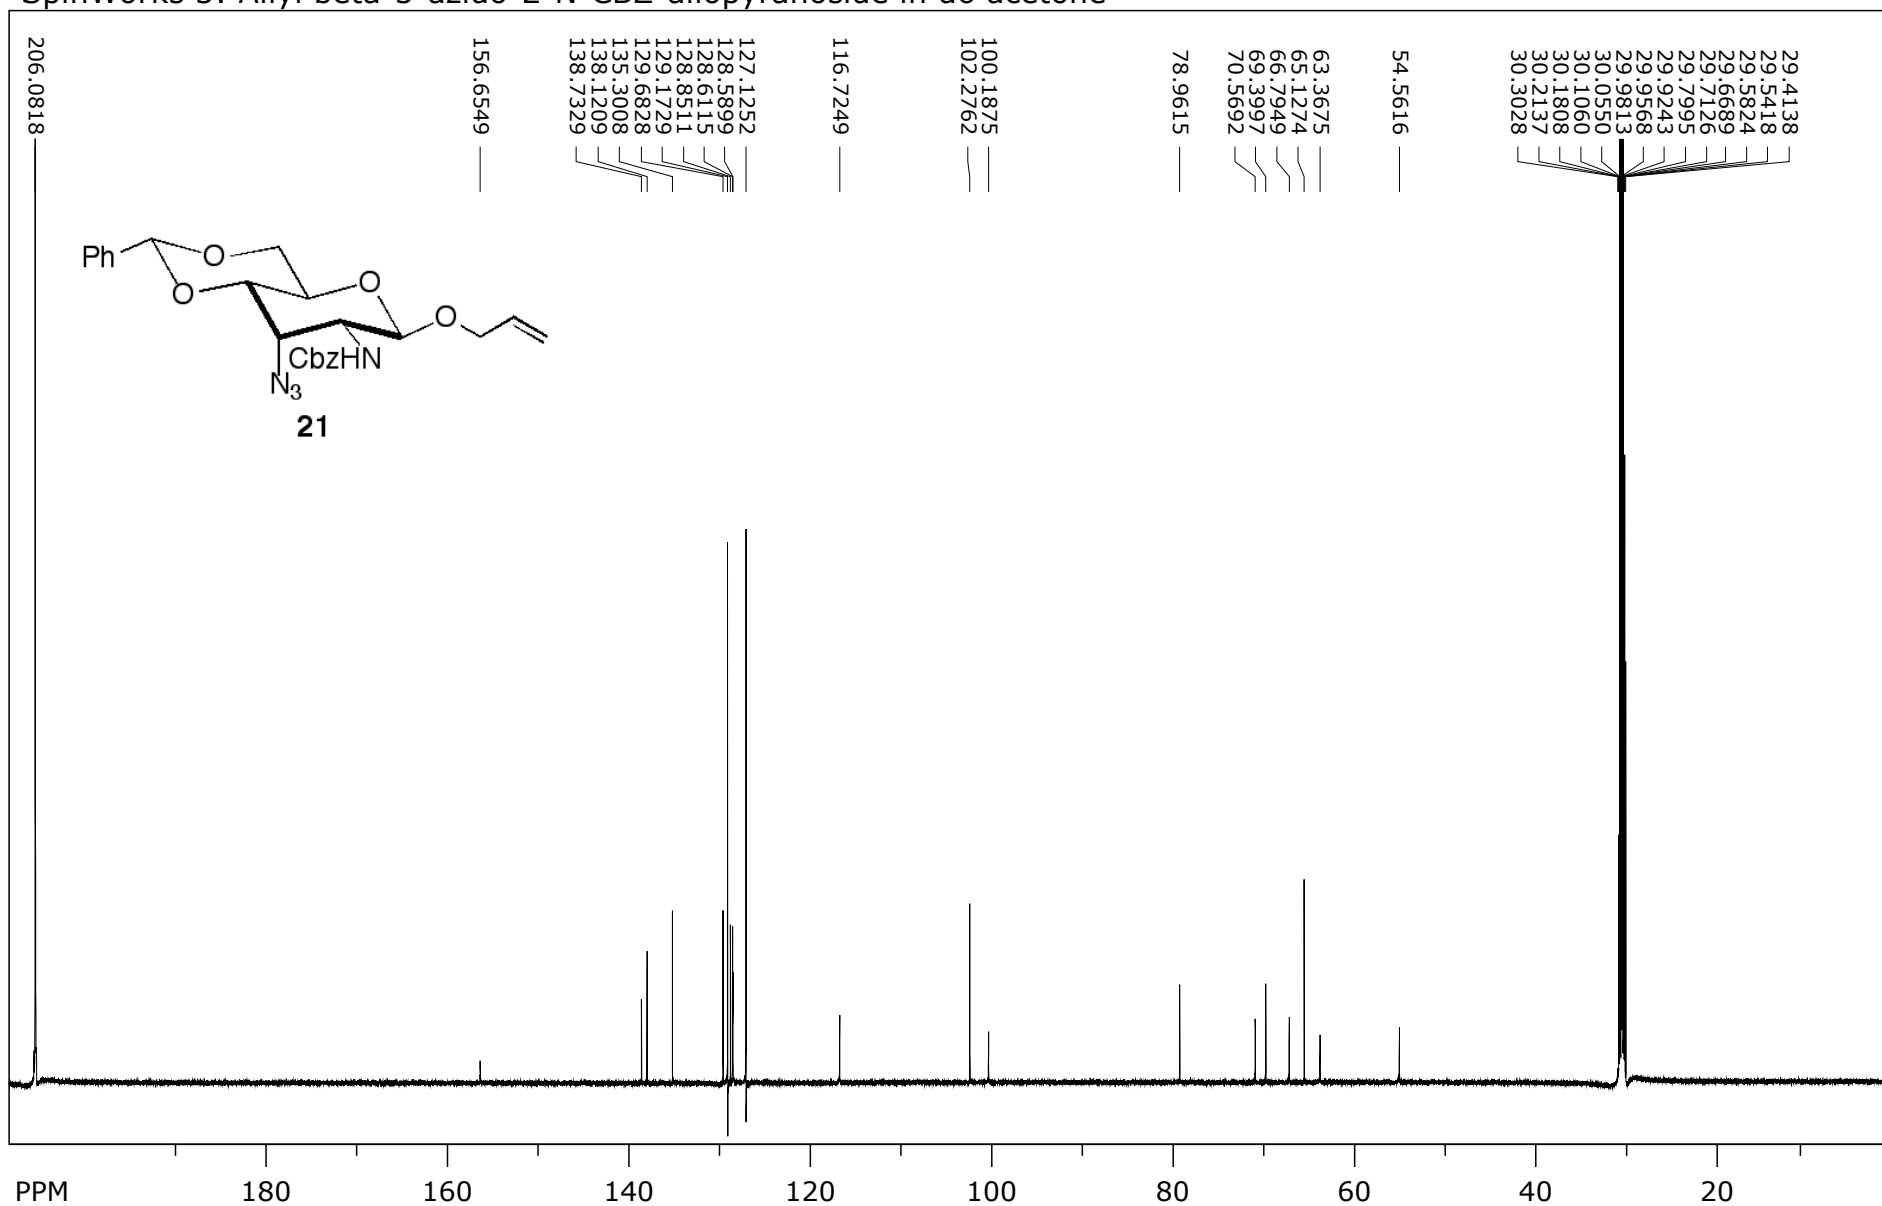

file: ...a\b-alloN3BnAc\_13C\_d6Acetone\1\fid exp: <zpgg30>  
transmitter freq.: 151.023519 MHz  
time domain size: 65536 points  
width: 36057.69 Hz = 238.7555 ppm = 0.550197 Hz/pt  
number of scans: 8192

freq. of 0 ppm: 151.008291 MHz  
processed size: 32768 complex points  
LB: 0.000 GF: 0.0000  
Hz/cm: 1262.718 ppm/cm: 8.36107

|               |             |             |             |                 |                                   |                        |             |
|---------------|-------------|-------------|-------------|-----------------|-----------------------------------|------------------------|-------------|
| Sample Name   | Unavailable | Position    | Unavailable | Instrument Name | Unavailable                       | User Name              | Unavailable |
| Inj Vol       | Unavailable | InjPosition | Unavailable | SampleType      | Unavailable                       | IRM Calibration Status | Success     |
| Data Filename | 26DAG1.d    | ACQ Method  |             | Comment         | Sample information is unavailable | Acquired Time          | Unavailable |

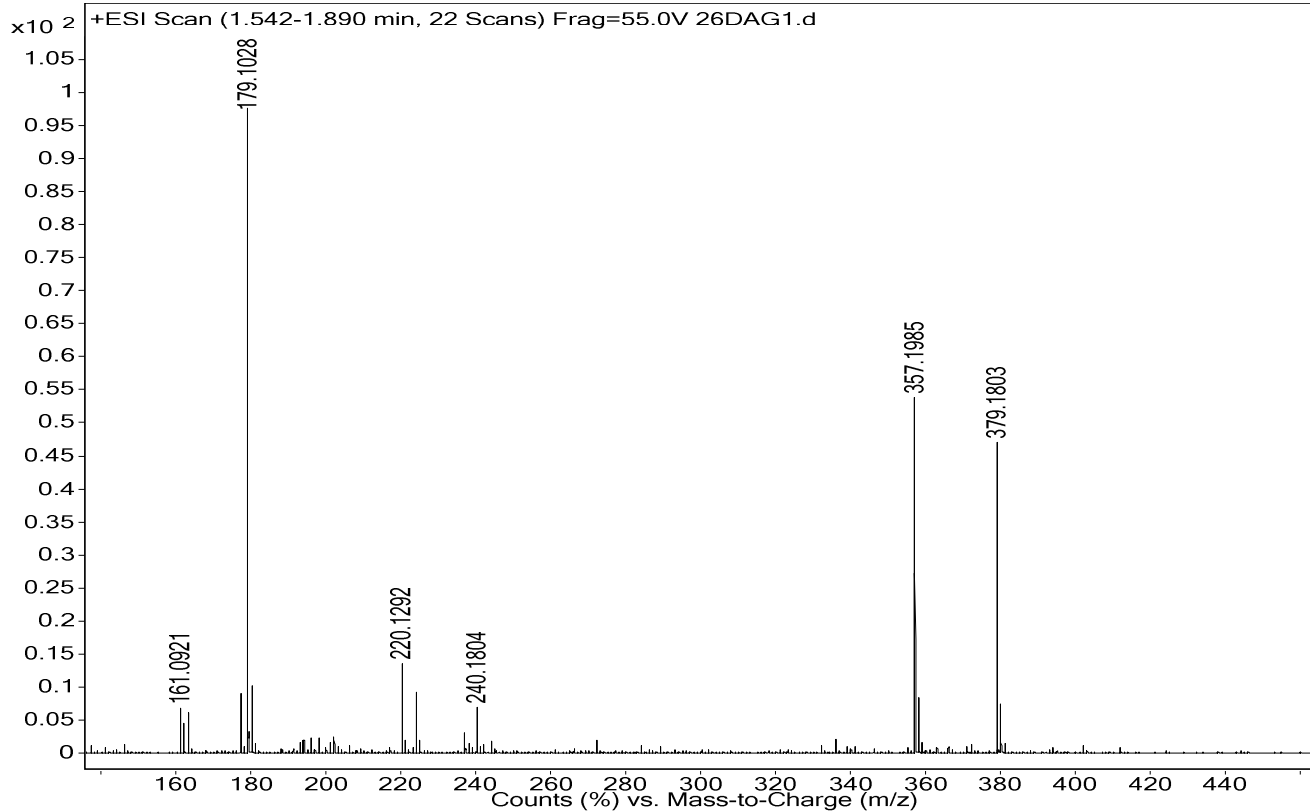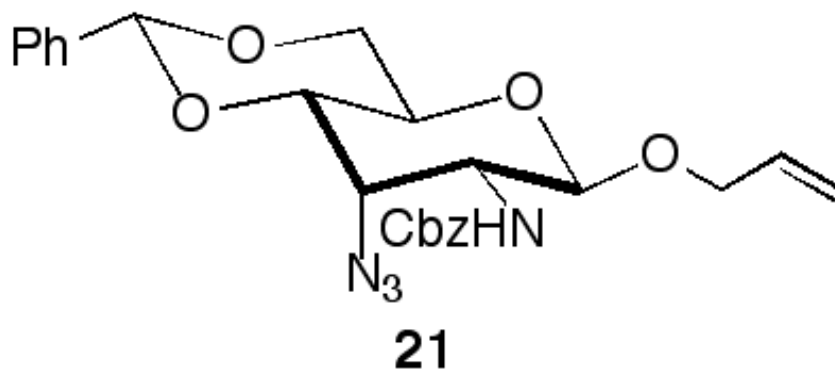

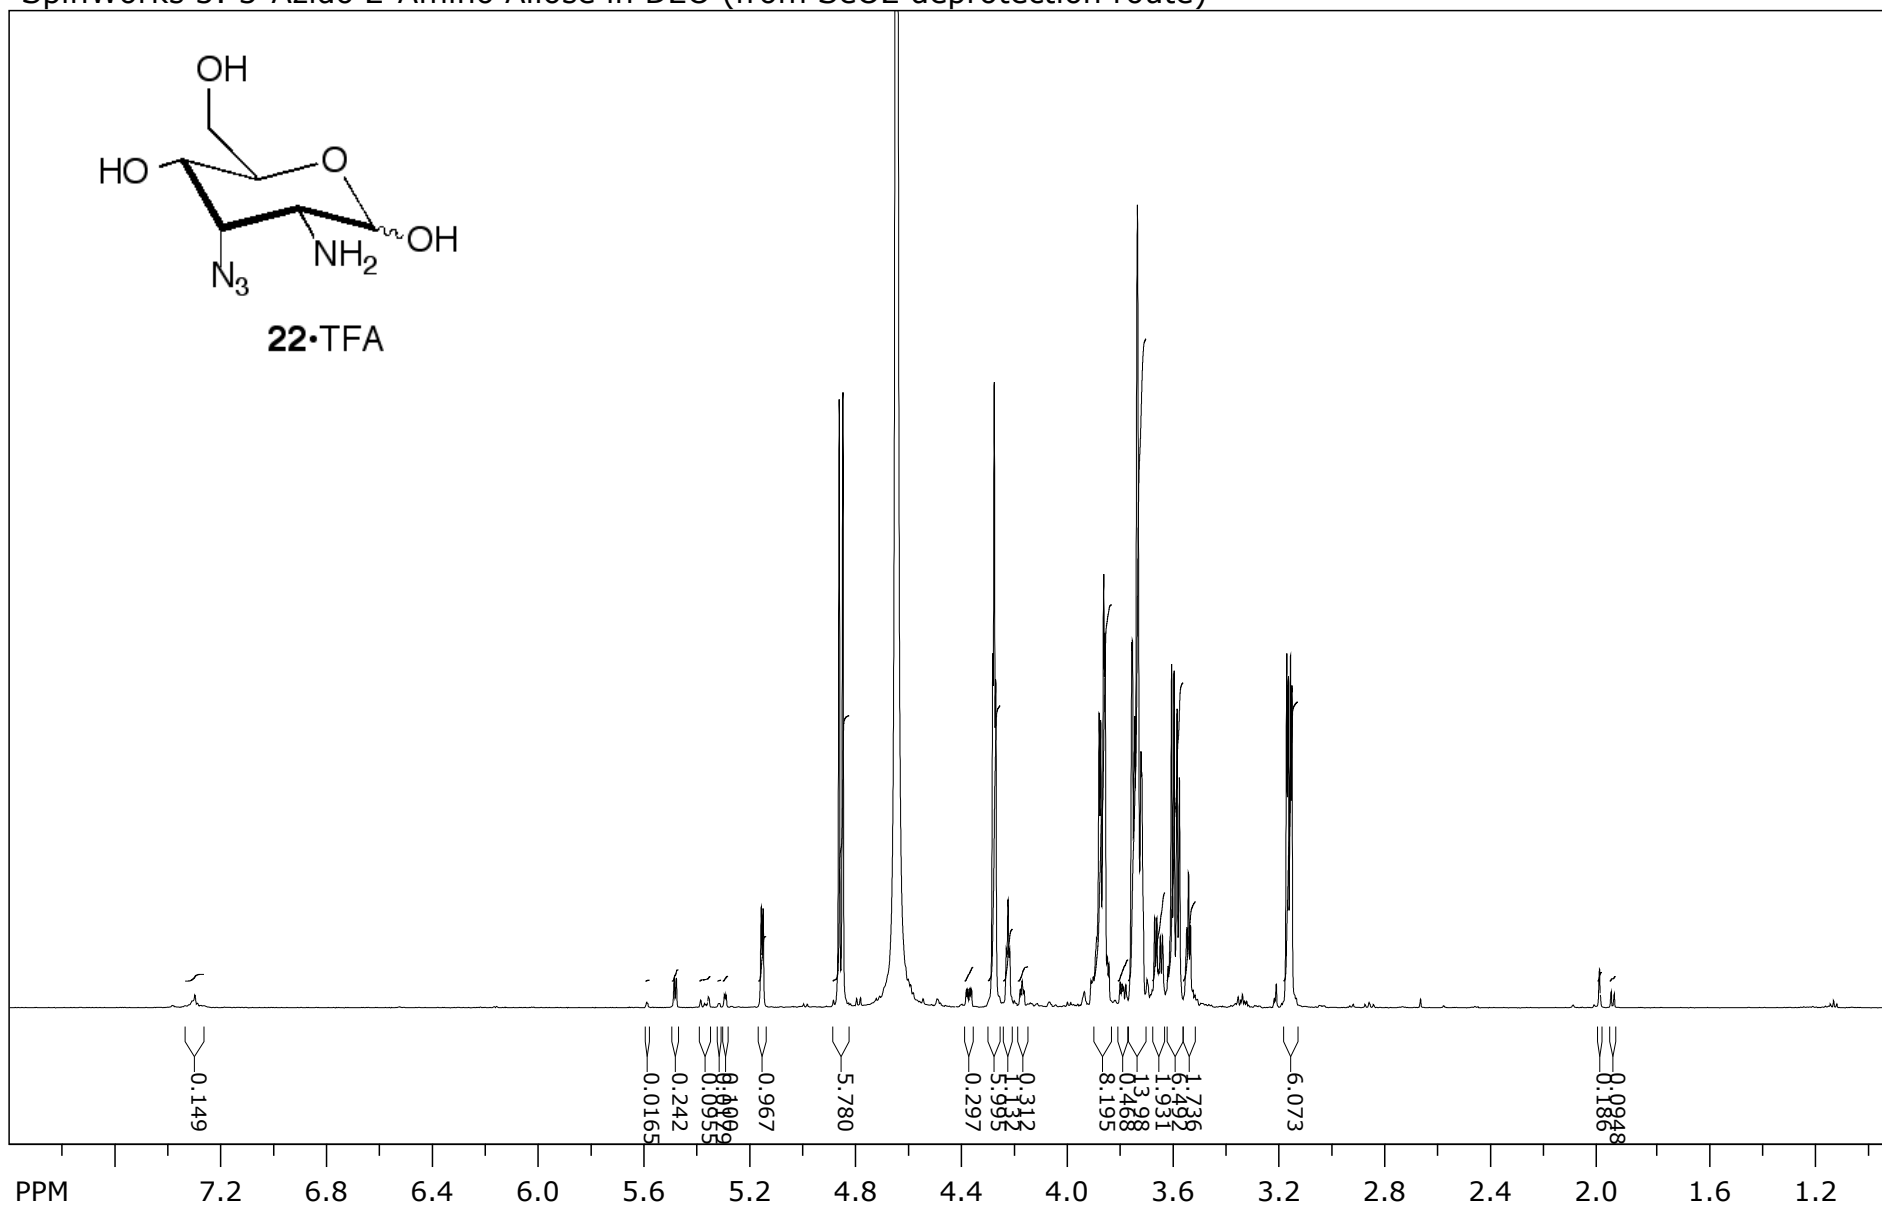

file: ...ocess\3azido2aminoAllose\_D2O\1\fid expt: <zgpr>  
transmitter freq.: 600.553538 MHz  
time domain size: 65536 points  
width: 8417.51 Hz = 14.0162 ppm = 0.128441 Hz/pt  
number of scans: 32

freq. of 0 ppm: 600.550036 MHz  
processed size: 262144 complex points  
LB: 0.000 GF: 0.0000  
Hz/cm: 170.981 ppm/cm: 0.28471

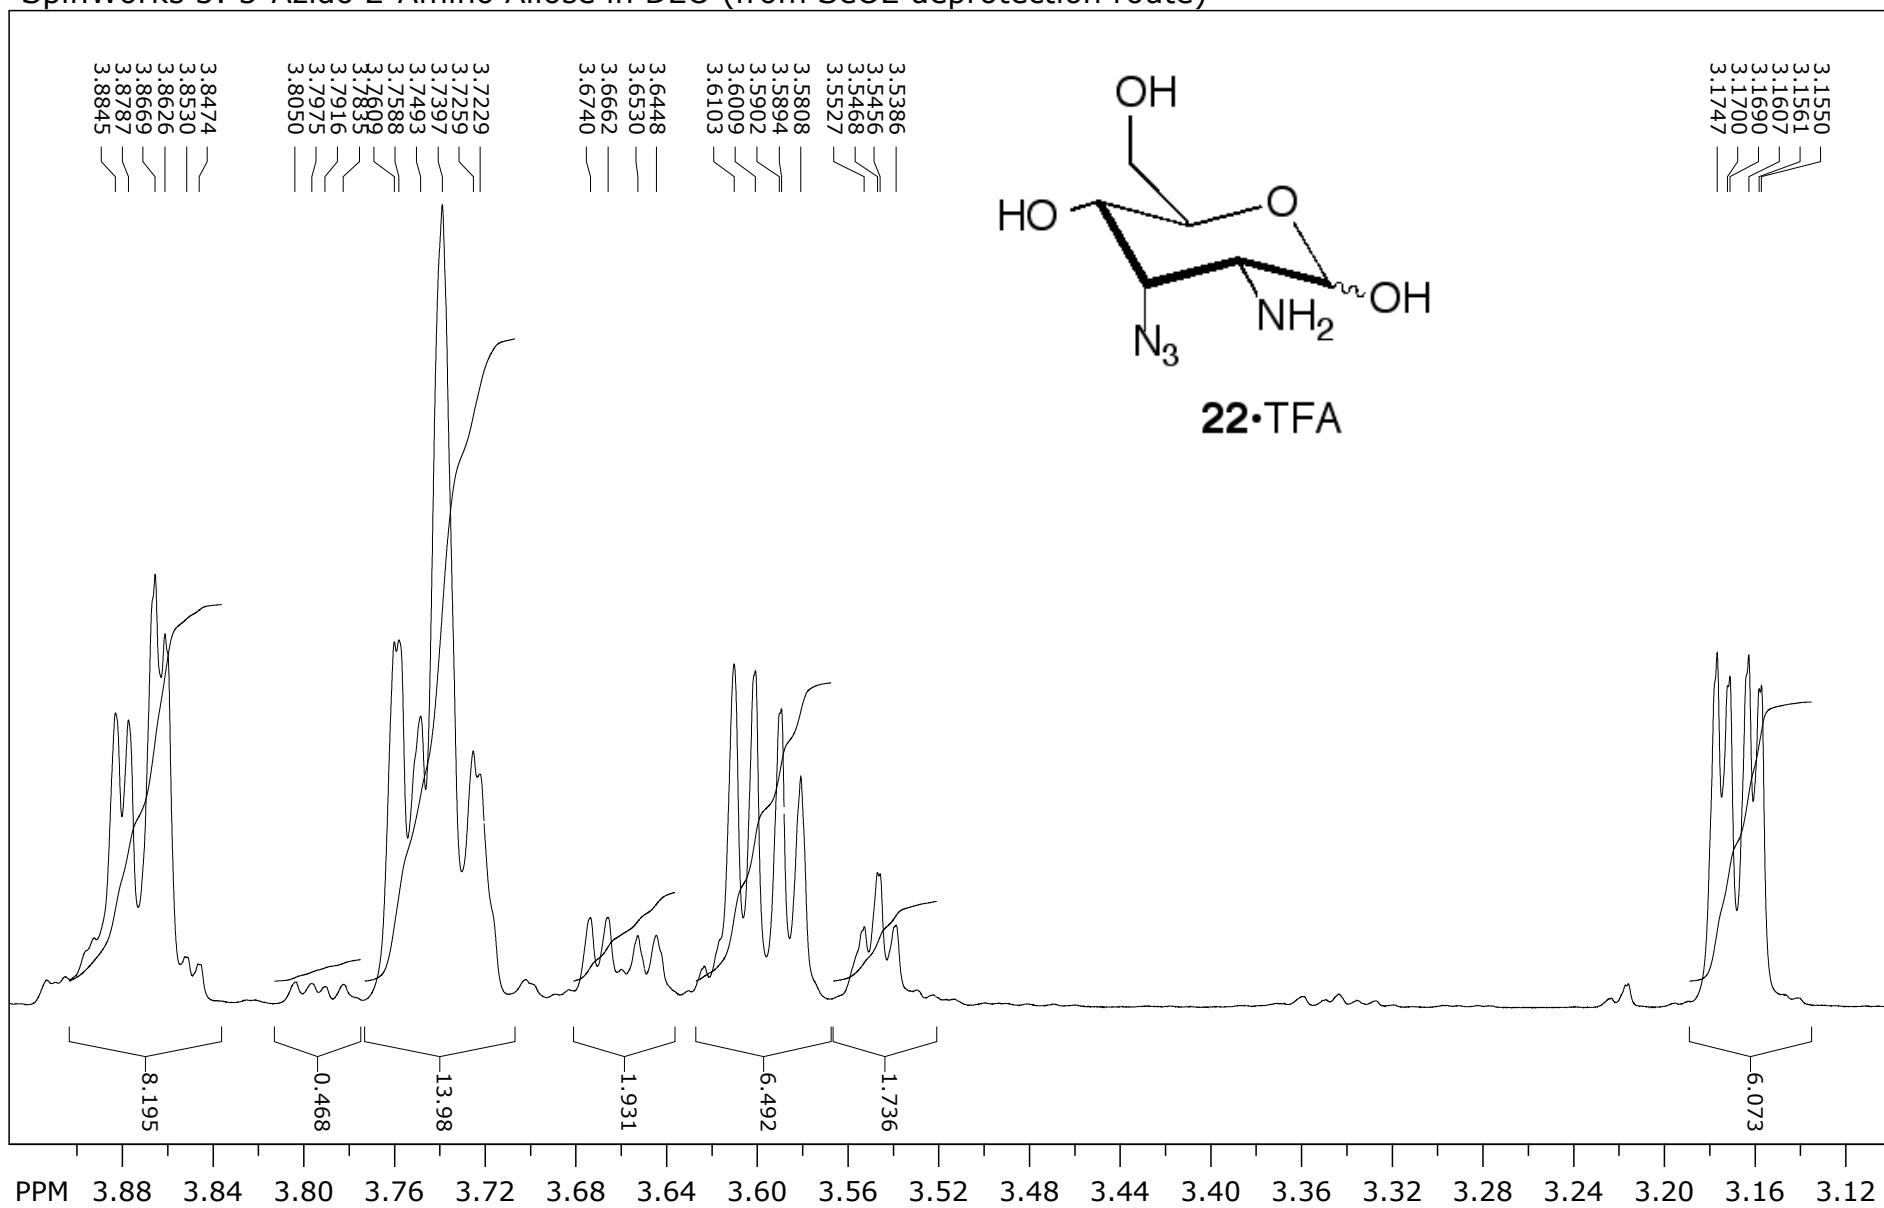

file: ...ocess\3azido2aminoAllose\_D2O\1\fid expt: <zgpr>  
 transmitter freq.: 600.553538 MHz  
 time domain size: 65536 points  
 width: 8417.51 Hz = 14.0162 ppm = 0.128441 Hz/pt  
 number of scans: 32

freq. of 0 ppm: 600.550036 MHz  
 processed size: 262144 complex points  
 LB: 0.000 GF: 0.0000  
 Hz/cm: 20.037 ppm/cm: 0.03336

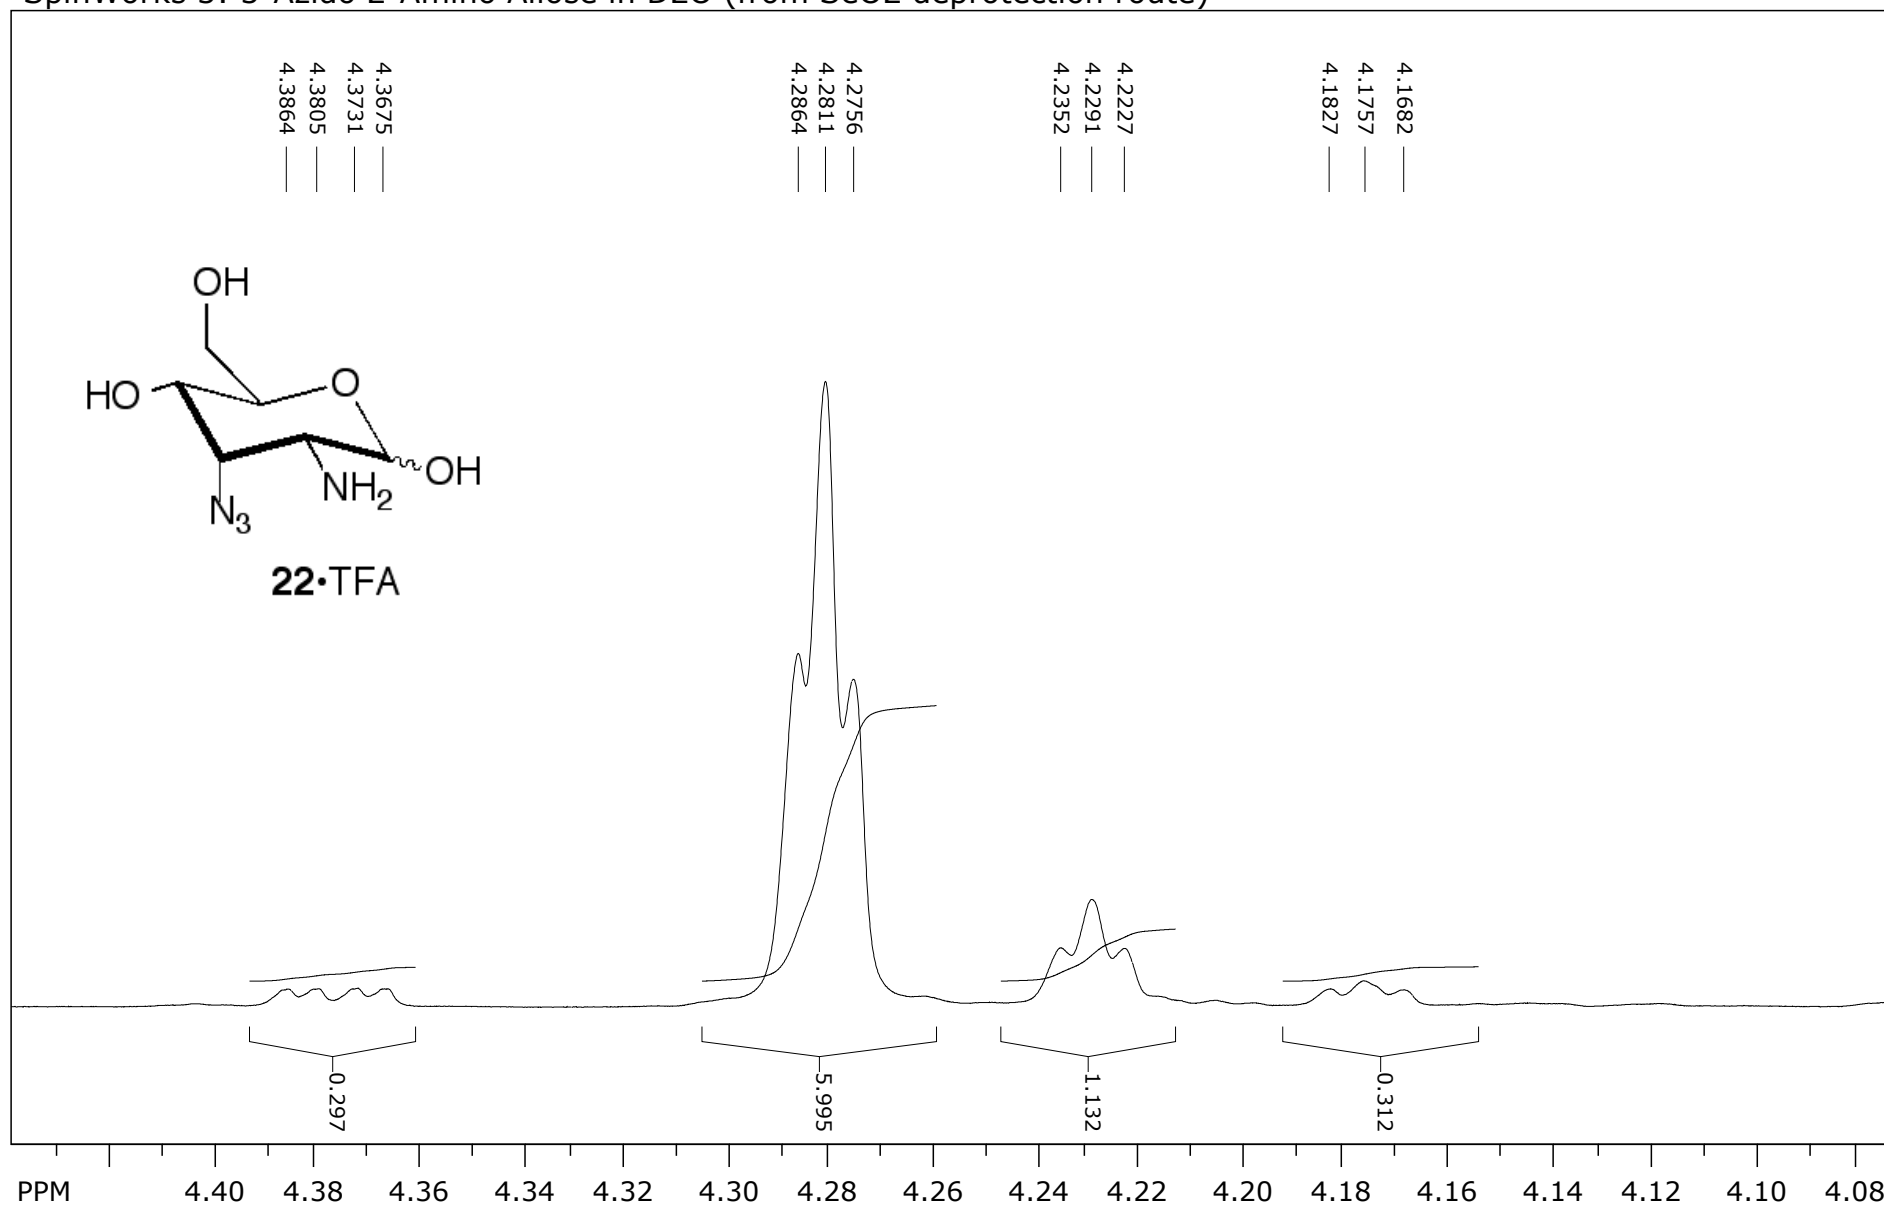

file: ...ocess\3azido2aminoAllose\_D2O\1\fid expt: <zgpr>  
transmitter freq.: 600.553538 MHz  
time domain size: 65536 points  
width: 8417.51 Hz = 14.0162 ppm = 0.128441 Hz/pt  
number of scans: 32

freq. of 0 ppm: 600.550036 MHz  
processed size: 262144 complex points  
LB: 0.000 GF: 0.0000  
Hz/cm: 8.831 ppm/cm: 0.01470

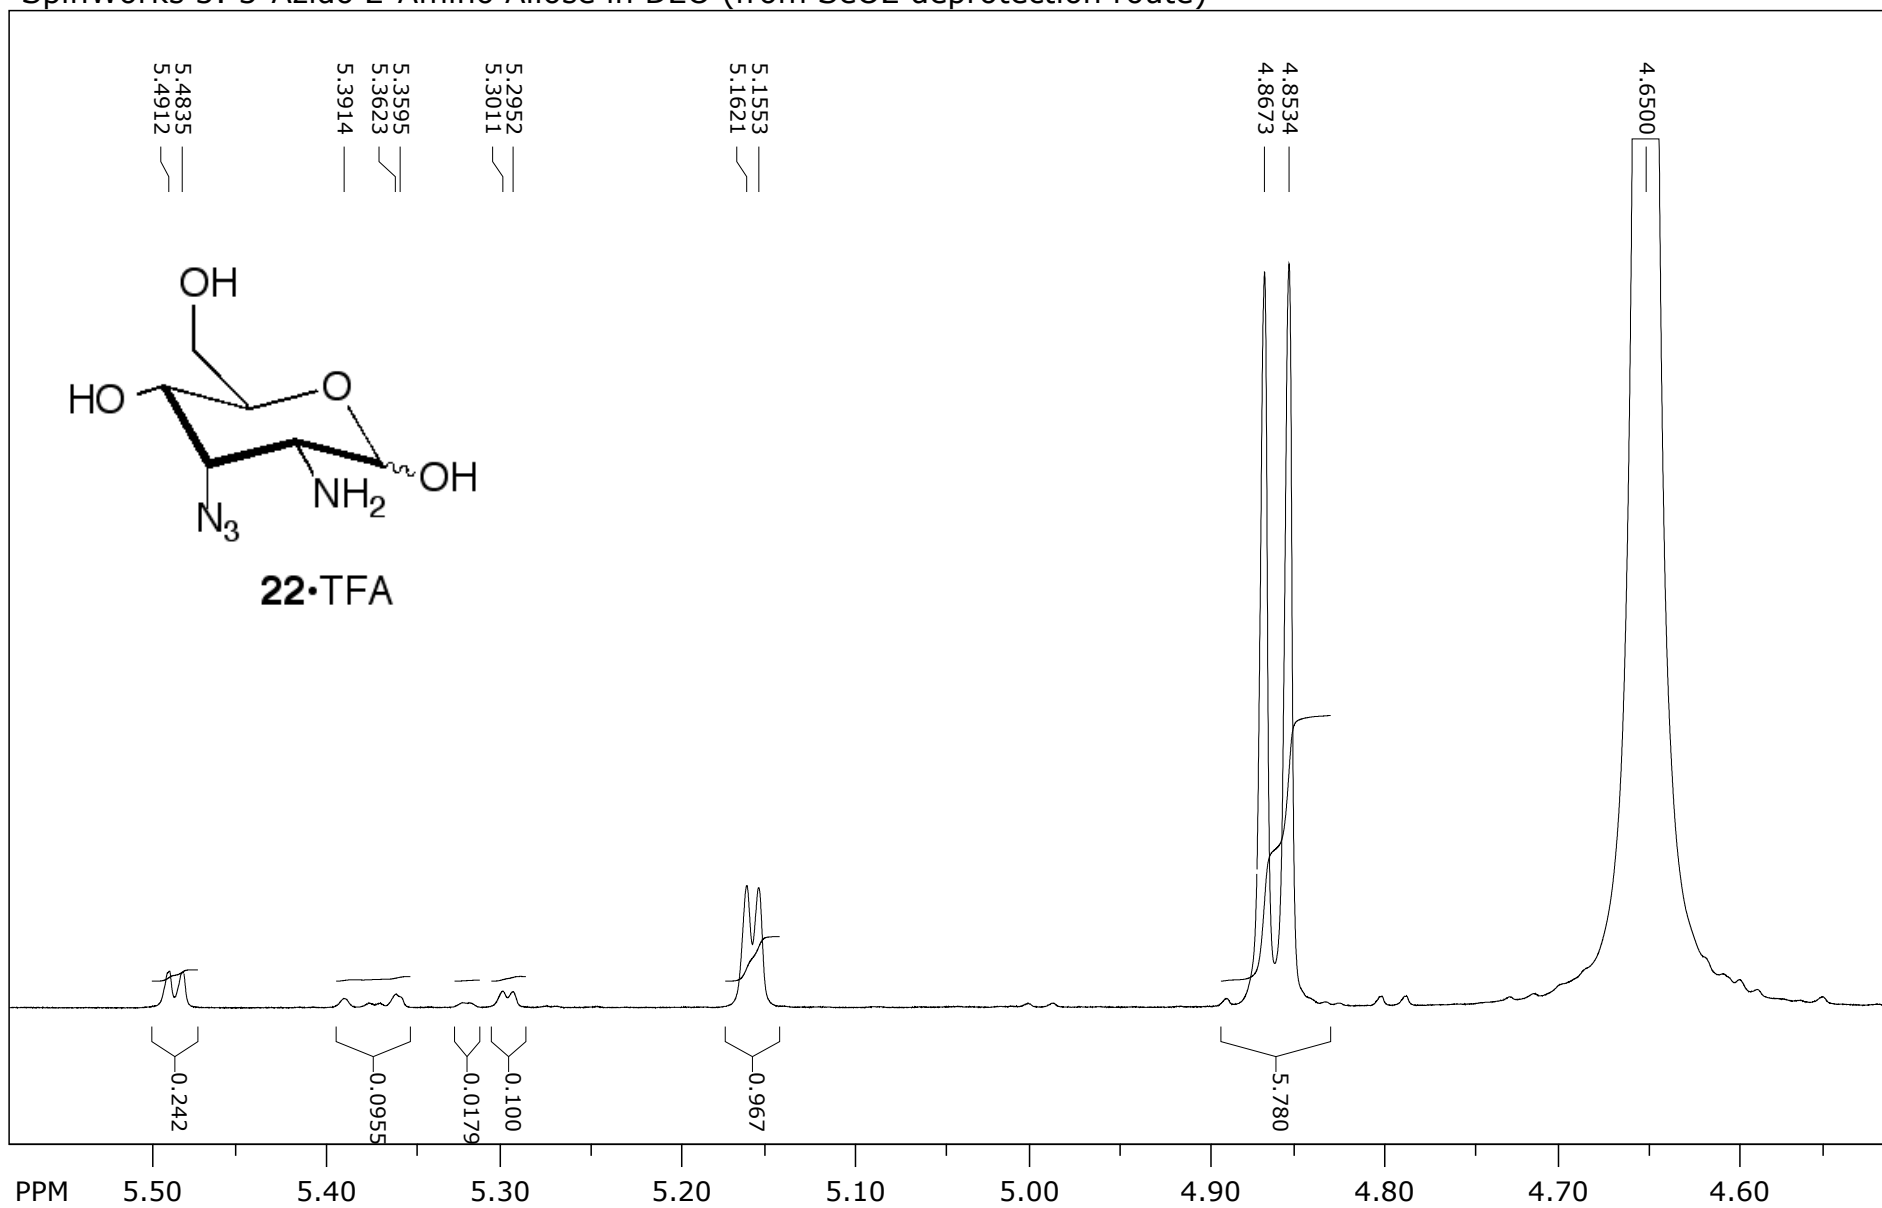

file: ...ocess\3azido2aminoAllose\_D2O\1\fid expt: <zgpr>  
transmitter freq.: 600.553538 MHz  
time domain size: 65536 points  
width: 8417.51 Hz = 14.0162 ppm = 0.128441 Hz/pt  
number of scans: 32

freq. of 0 ppm: 600.550036 MHz  
processed size: 262144 complex points  
LB: 0.000 GF: 0.0000  
Hz/cm: 25.741 ppm/cm: 0.04286



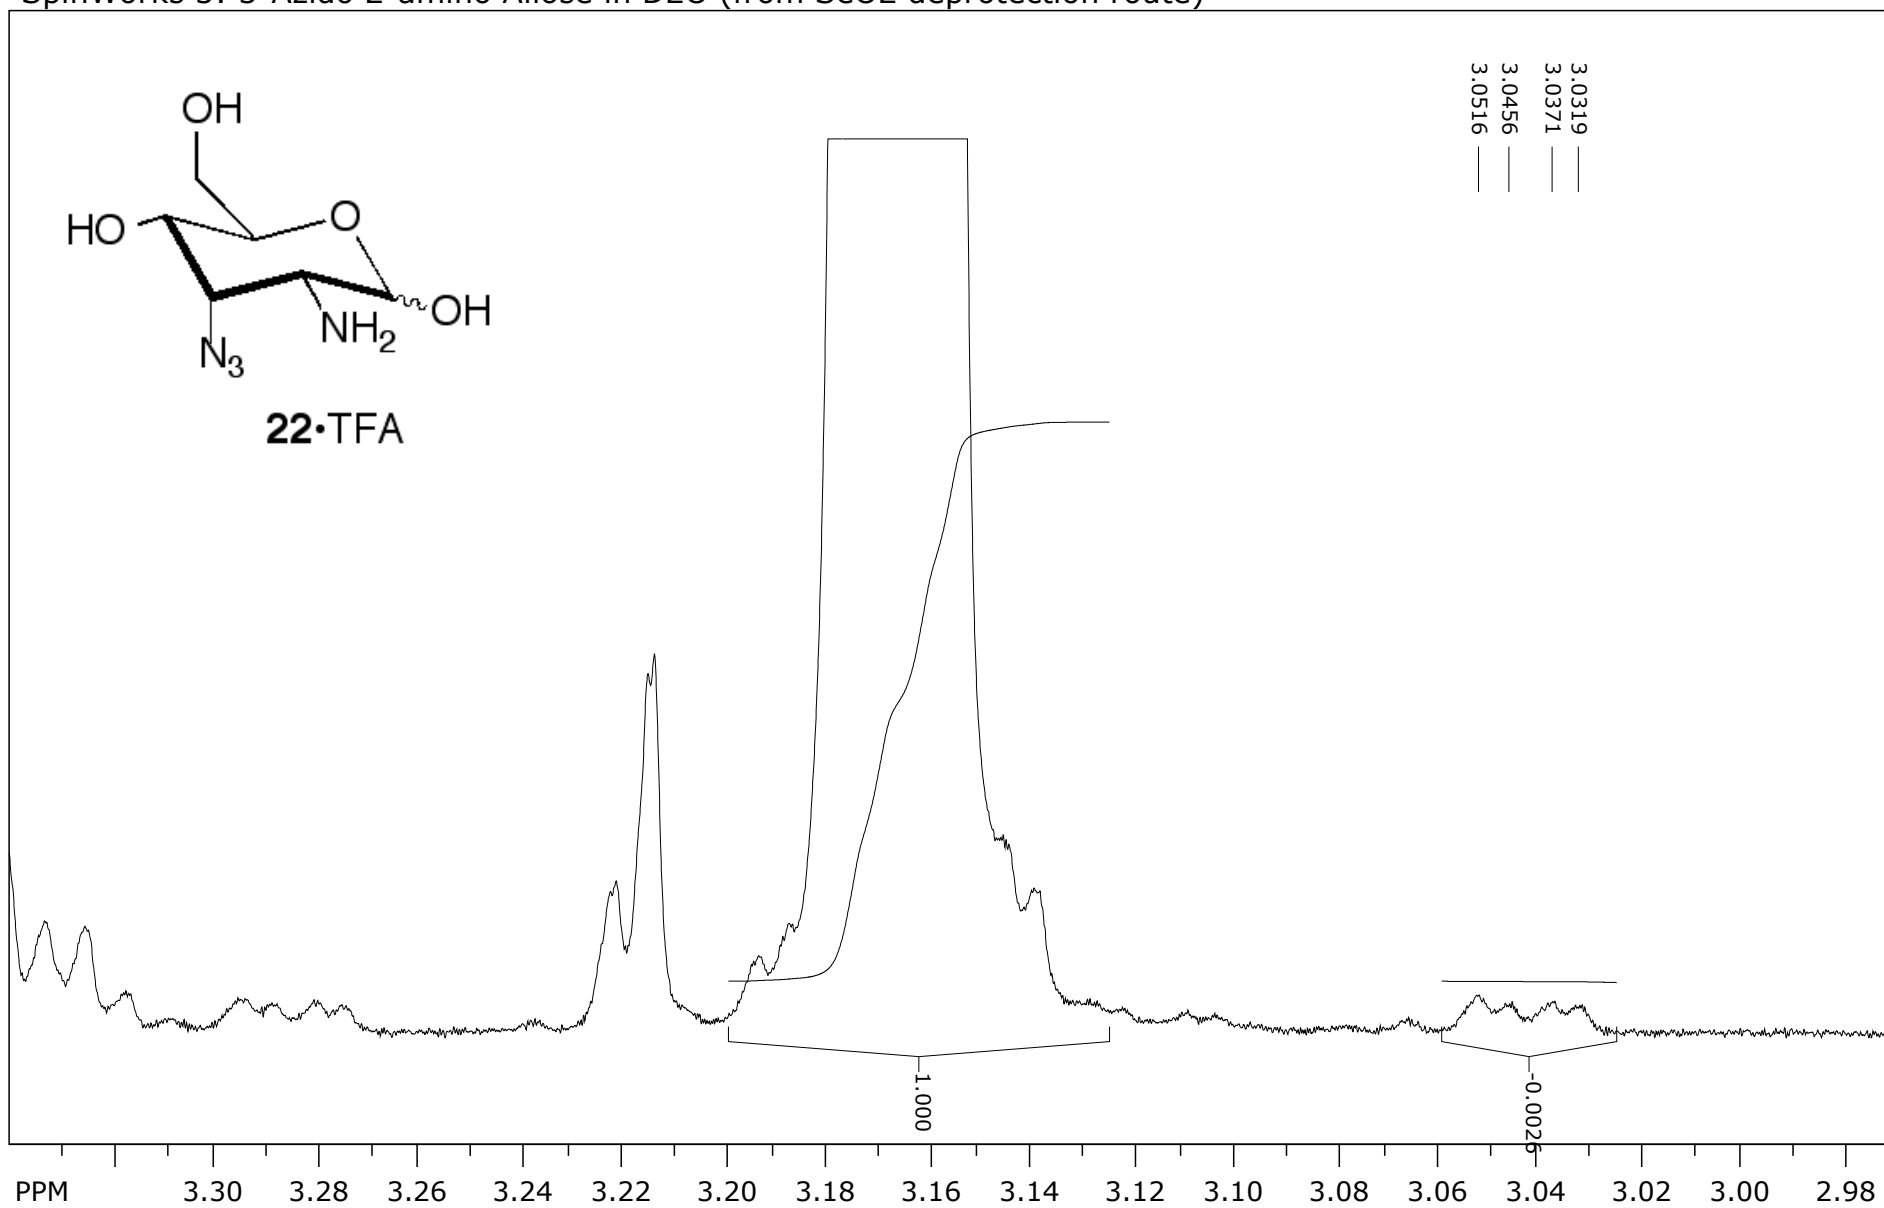

file: ...o2aminoAllose\_D2O SeO2 route\1\fid exp: <zgpr>  
transmitter freq.: 600.553538 MHz  
time domain size: 65536 points  
width: 8417.51 Hz = 14.0162 ppm = 0.128441 Hz/pt  
number of scans: 32

freq. of 0 ppm: 600.550036 MHz  
processed size: 262144 complex points  
LB: 0.000 GF: 0.0000  
Hz/cm: 8.913 ppm/cm: 0.01484

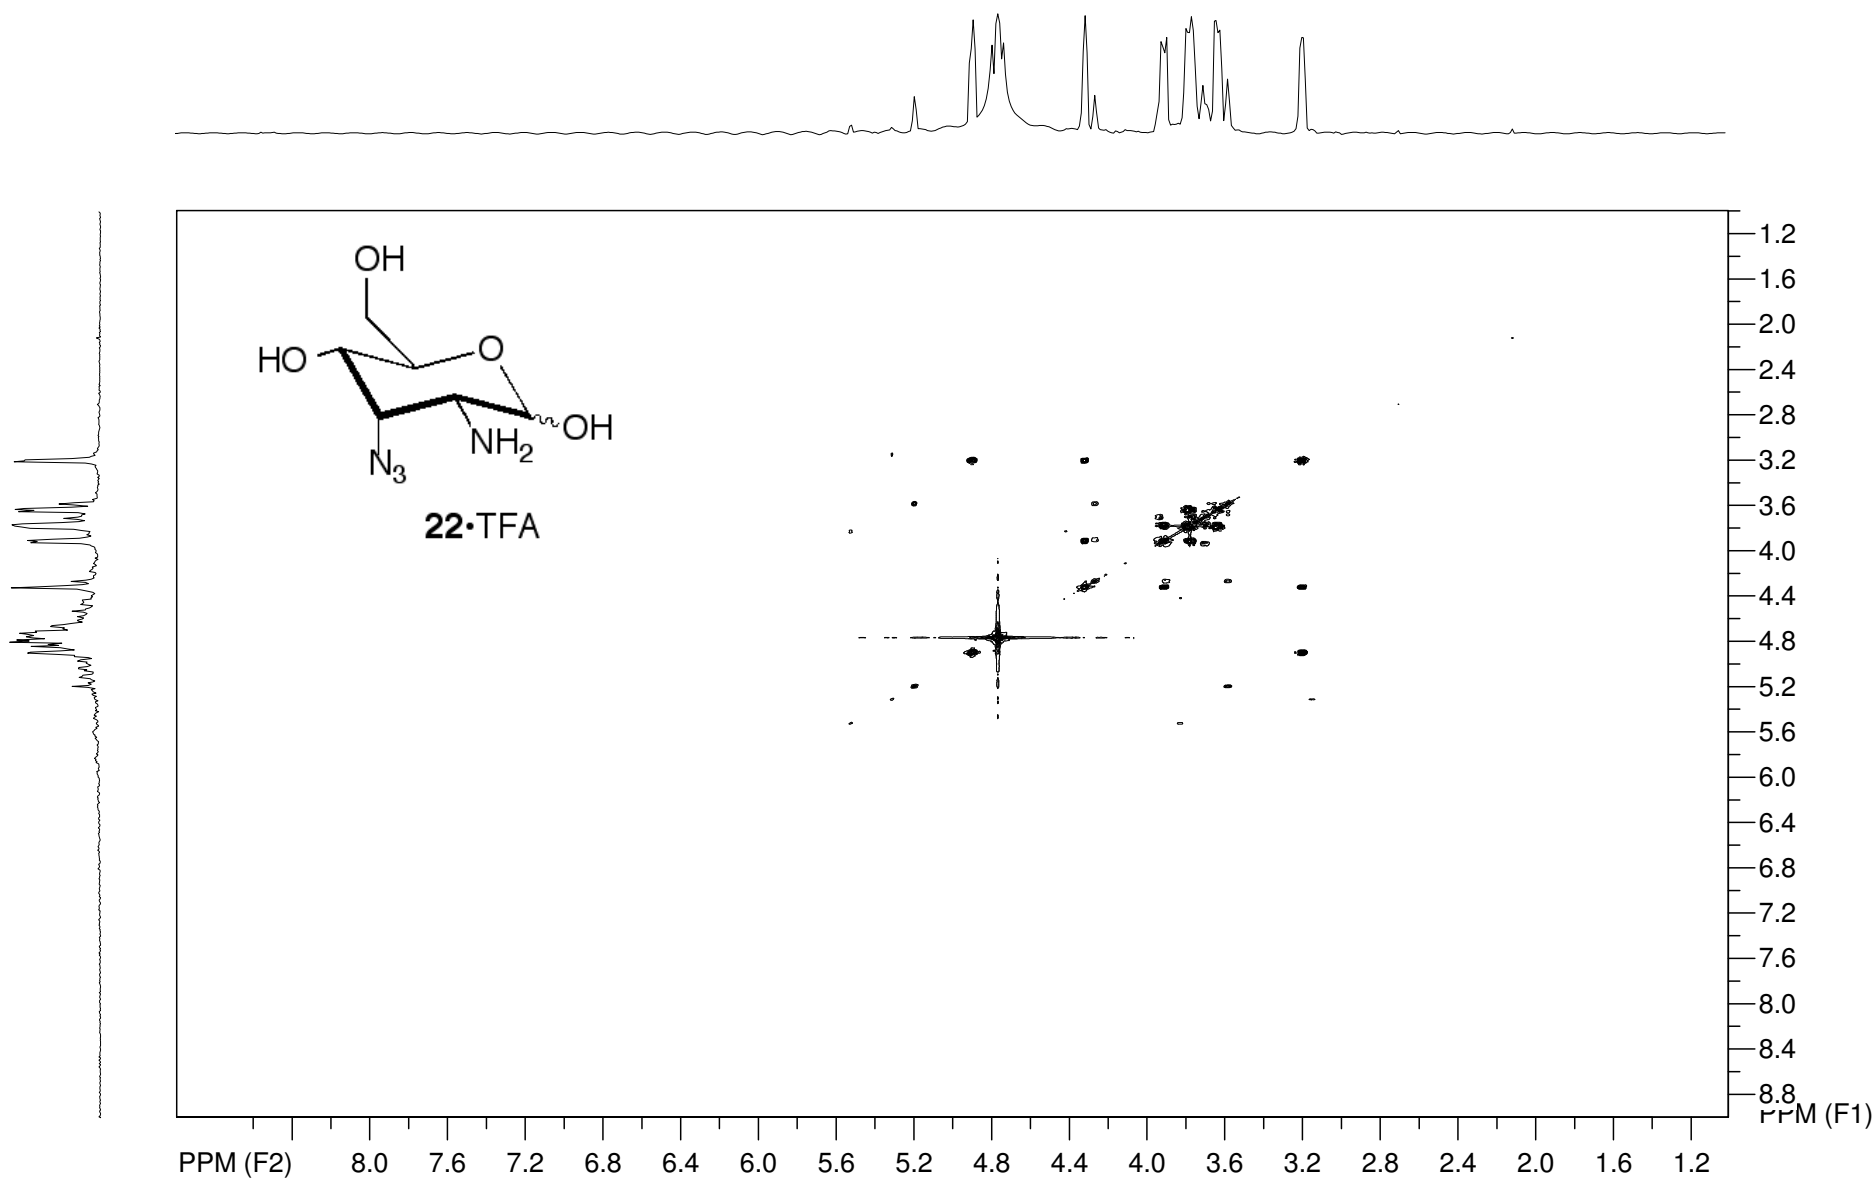

file: C:\Users\Jeff\Documents\NMR Folder\NMR Data\remaining to process\3Azido2Aminoallose\_Dpr\F2.freq. of 0 ppm: 600.549962 MHz  
transmitter freq.: 600.552832 MHz  
time domain size: 2048 by 2048 points  
width (F2): 6009.59 Hz = 10.006806 ppm = 2.934368 Hz/pt  
number of scans: 2

processed size: 1024 complex points  
window function: Sine  
shift: 0.0 degrees  
Hz/cm: 233.931 ppm/cm: 0.38953

F1: freq. of 0 ppm: 600.549962 MHz  
processed size: 1024 complex points  
window function: Sine  
shift: 0.0 degrees  
Hz/cm: 400.685 ppm/cm: 0.66719

## 3N3 2-aminoallose. TFA salt

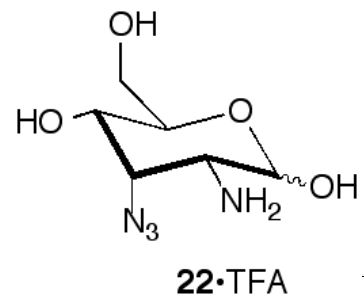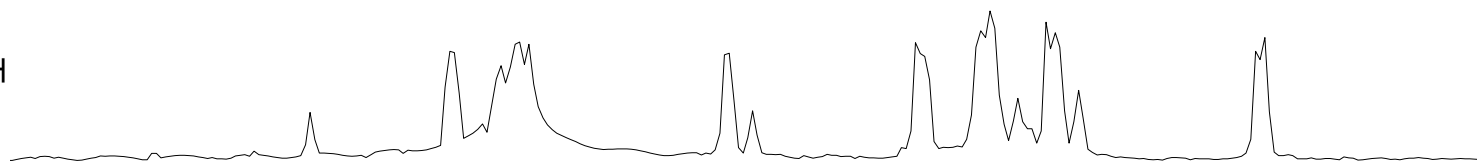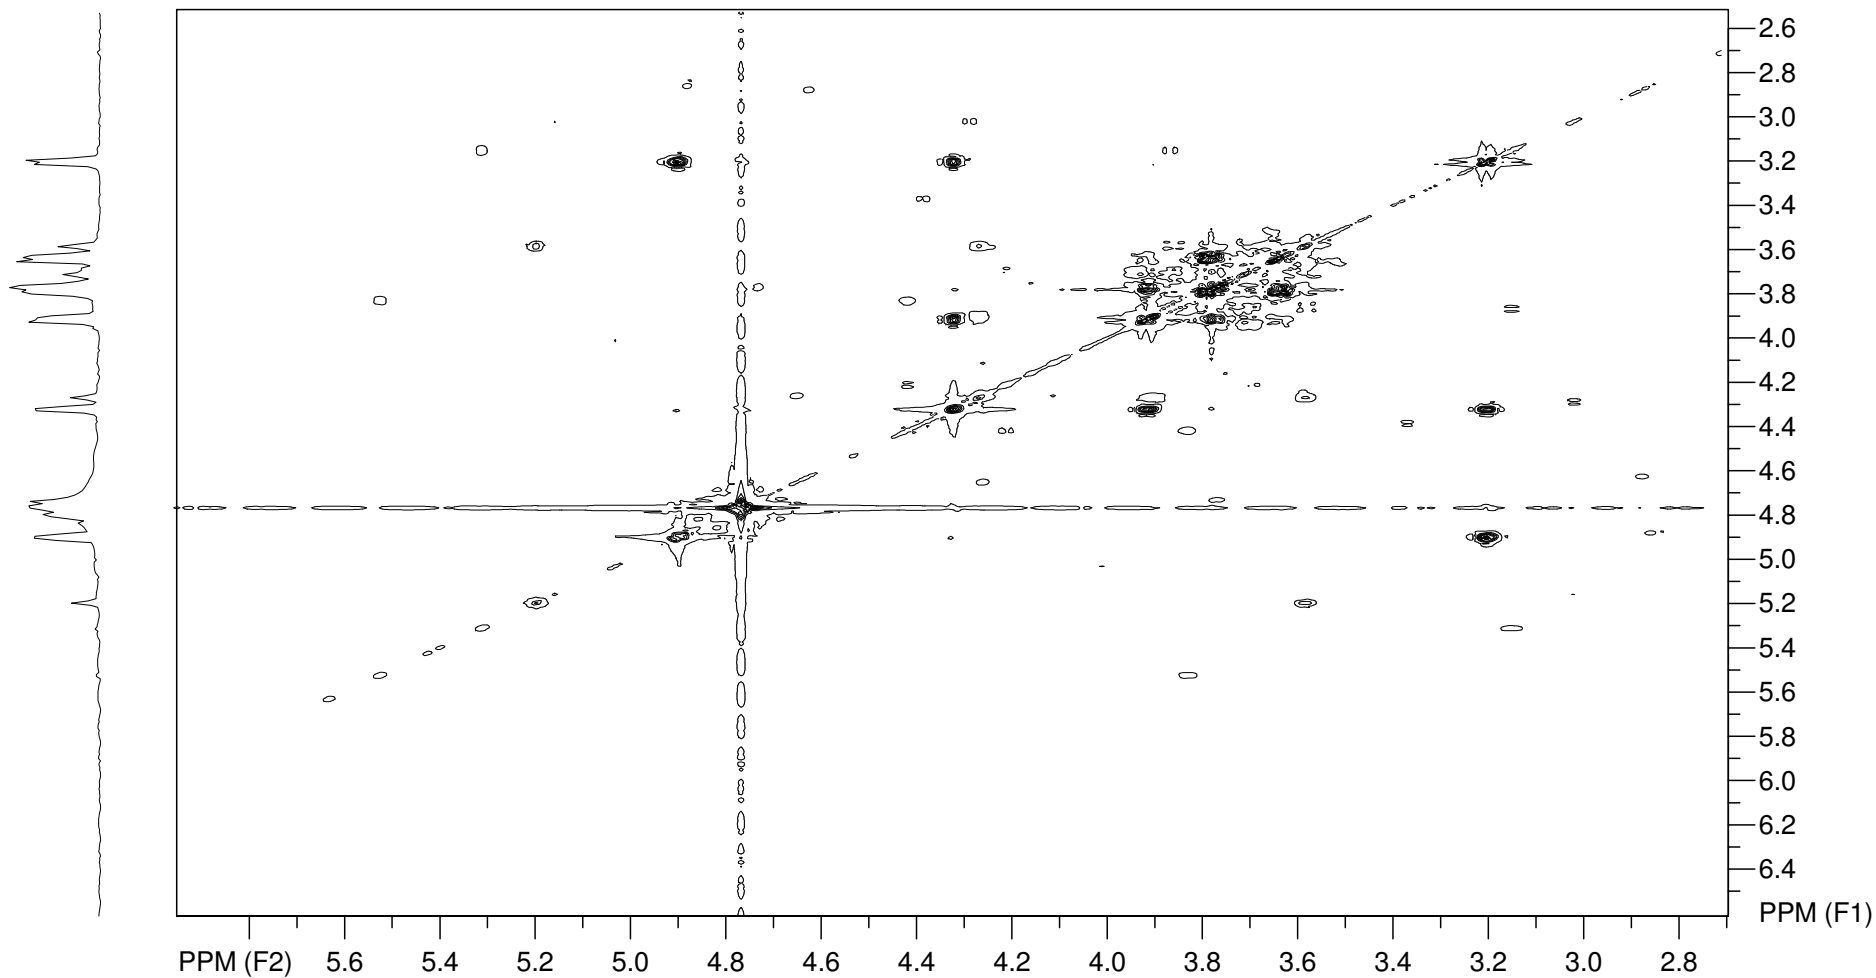

file: C:\Users\Jeff\Documents\NMR Folder\NMR Data\3Azido2Aminoallose\_Dprotd\_COSY\1\ser  
 transmitter freq.: 600.552832 MHz  
 time domain size: 2048 by 2048 points  
 width (F2): 6009.59 Hz = 10.006806 ppm = 2.934368 Hz/pt  
 number of scans: 2

exp1F2::freq. of 0 ppm: 600.549962 MHz  
 processed size: 1024 complex points  
 window function: Sine  
 shift: 0.0 degrees  
 Hz/cm: 95.380 ppm/cm: 0.15882

F1: freq. of 0 ppm: 600.549962 MHz  
 processed size: 1024 complex points  
 window function: Sine  
 shift: 0.0 degrees  
 Hz/cm: 205.094 ppm/cm: 0.34151

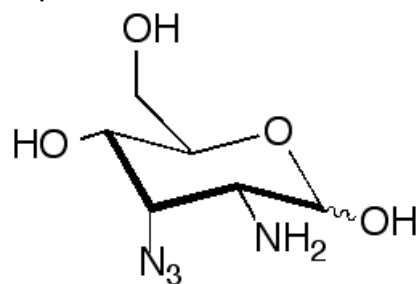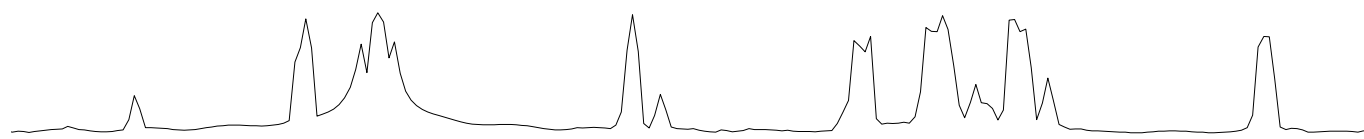22·TFA In D<sub>2</sub>O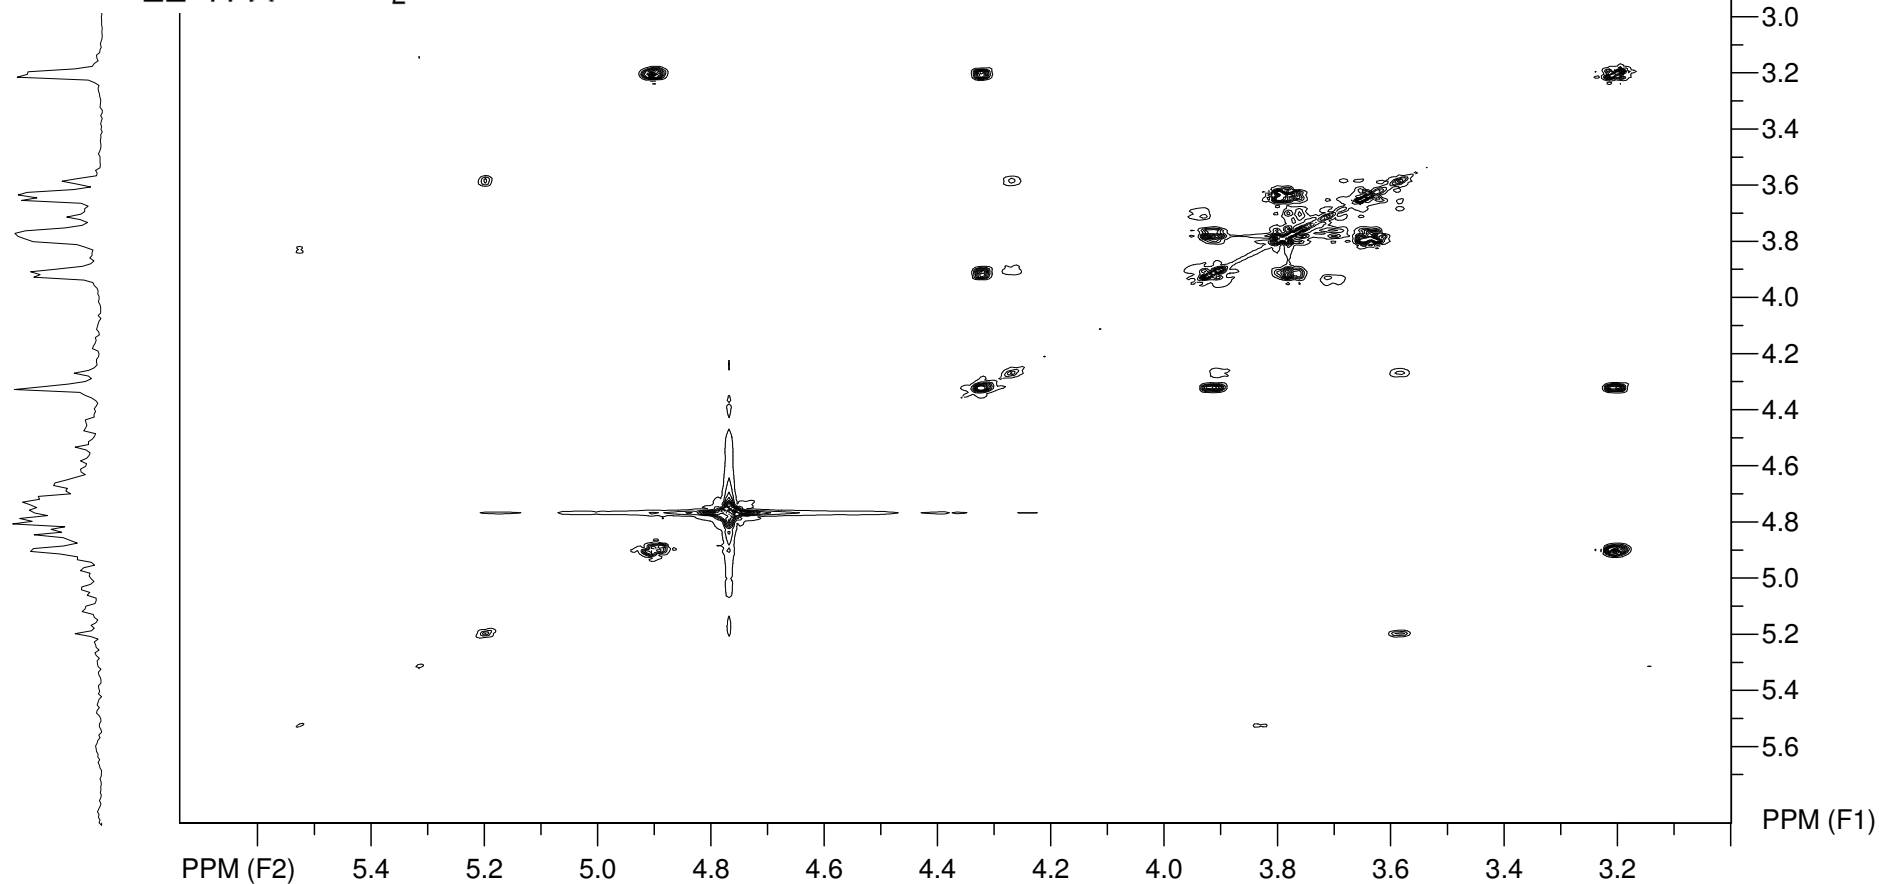

file: C:\Users\Jeff\Documents\NMR Folder\NMR Data\remaining to process\3Azido2Aminoallose\_Dpr\F2.freq. of 0 ppm: 600.549962 MHz  
 transmitter freq.: 600.552832 MHz  
 time domain size: 2048 by 2048 points  
 width (F2): 6009.59 Hz = 10.006806 ppm = 2.934368 Hz/pt  
 number of scans: 2

processed size: 1024 complex points  
 window function: Sine  
 shift: 0.0 degrees  
 Hz/cm: 80.234 ppm/cm: 0.13360

F1: freq. of 0 ppm: 600.549962 MHz  
 processed size: 1024 complex points  
 window function: Sine  
 shift: 0.0 degrees  
 Hz/cm: 161.669 ppm/cm: 0.26920

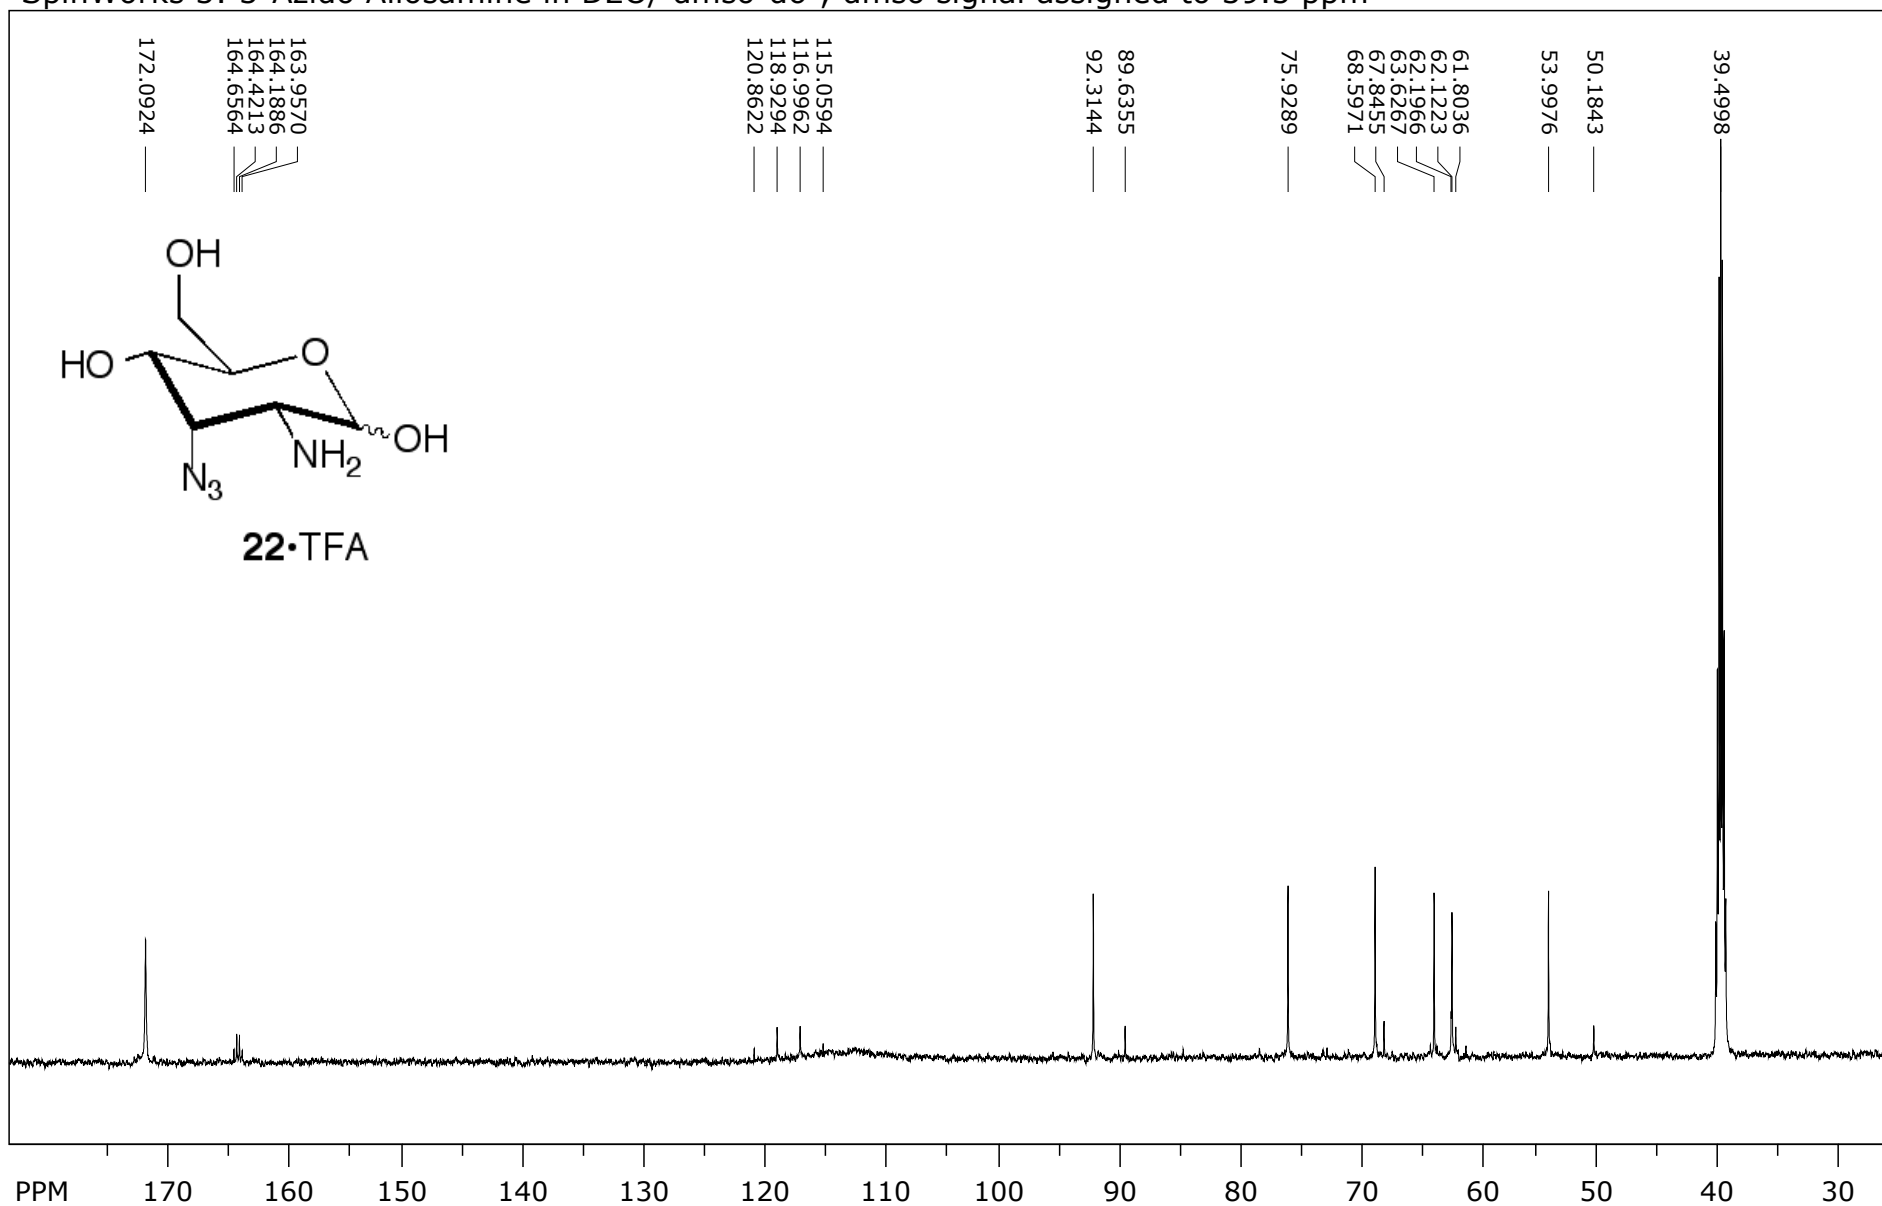

file: ...minoallose\_DprotD\_D2Odmso13C\1\fid expt: <zpgg30>  
transmitter freq.: 151.023519 MHz  
time domain size: 65536 points  
width: 36057.69 Hz = 238.7555 ppm = 0.550197 Hz/pt  
number of scans: 30720

freq. of 0 ppm: 151.008169 MHz  
processed size: 32768 complex points  
LB: 5.000 GF: 0.0000  
Hz/cm: 956.978 ppm/cm: 6.33661

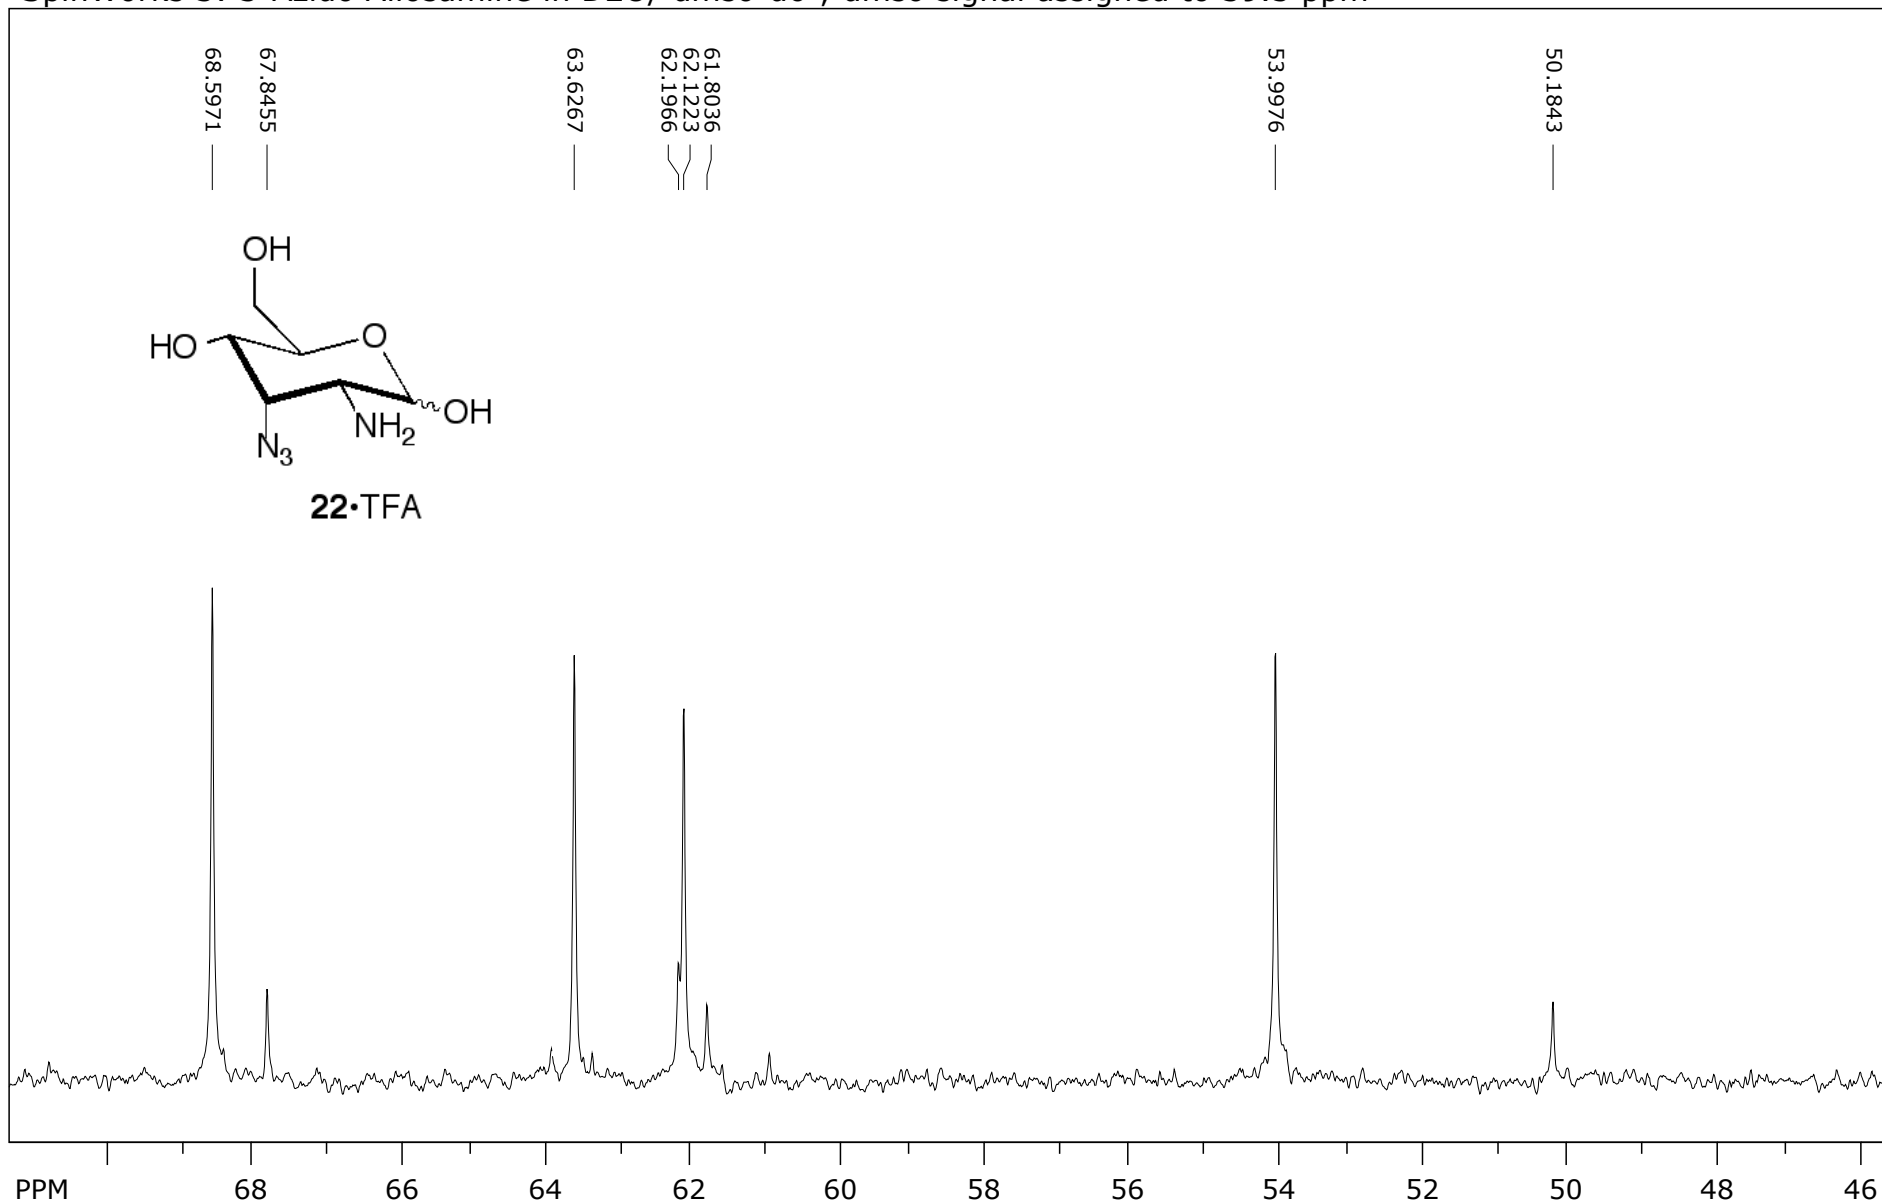

file: ...minoallose\_Dprotd\_D2OdmsO13C\1\fid expt: <zpgg30>  
transmitter freq.: 151.023519 MHz  
time domain size: 65536 points  
width: 36057.69 Hz = 238.7555 ppm = 0.550197 Hz/pt  
number of scans: 30720

freq. of 0 ppm: 151.008169 MHz  
processed size: 32768 complex points  
LB: 5.000 GF: 0.0000  
Hz/cm: 156.143 ppm/cm: 1.03390

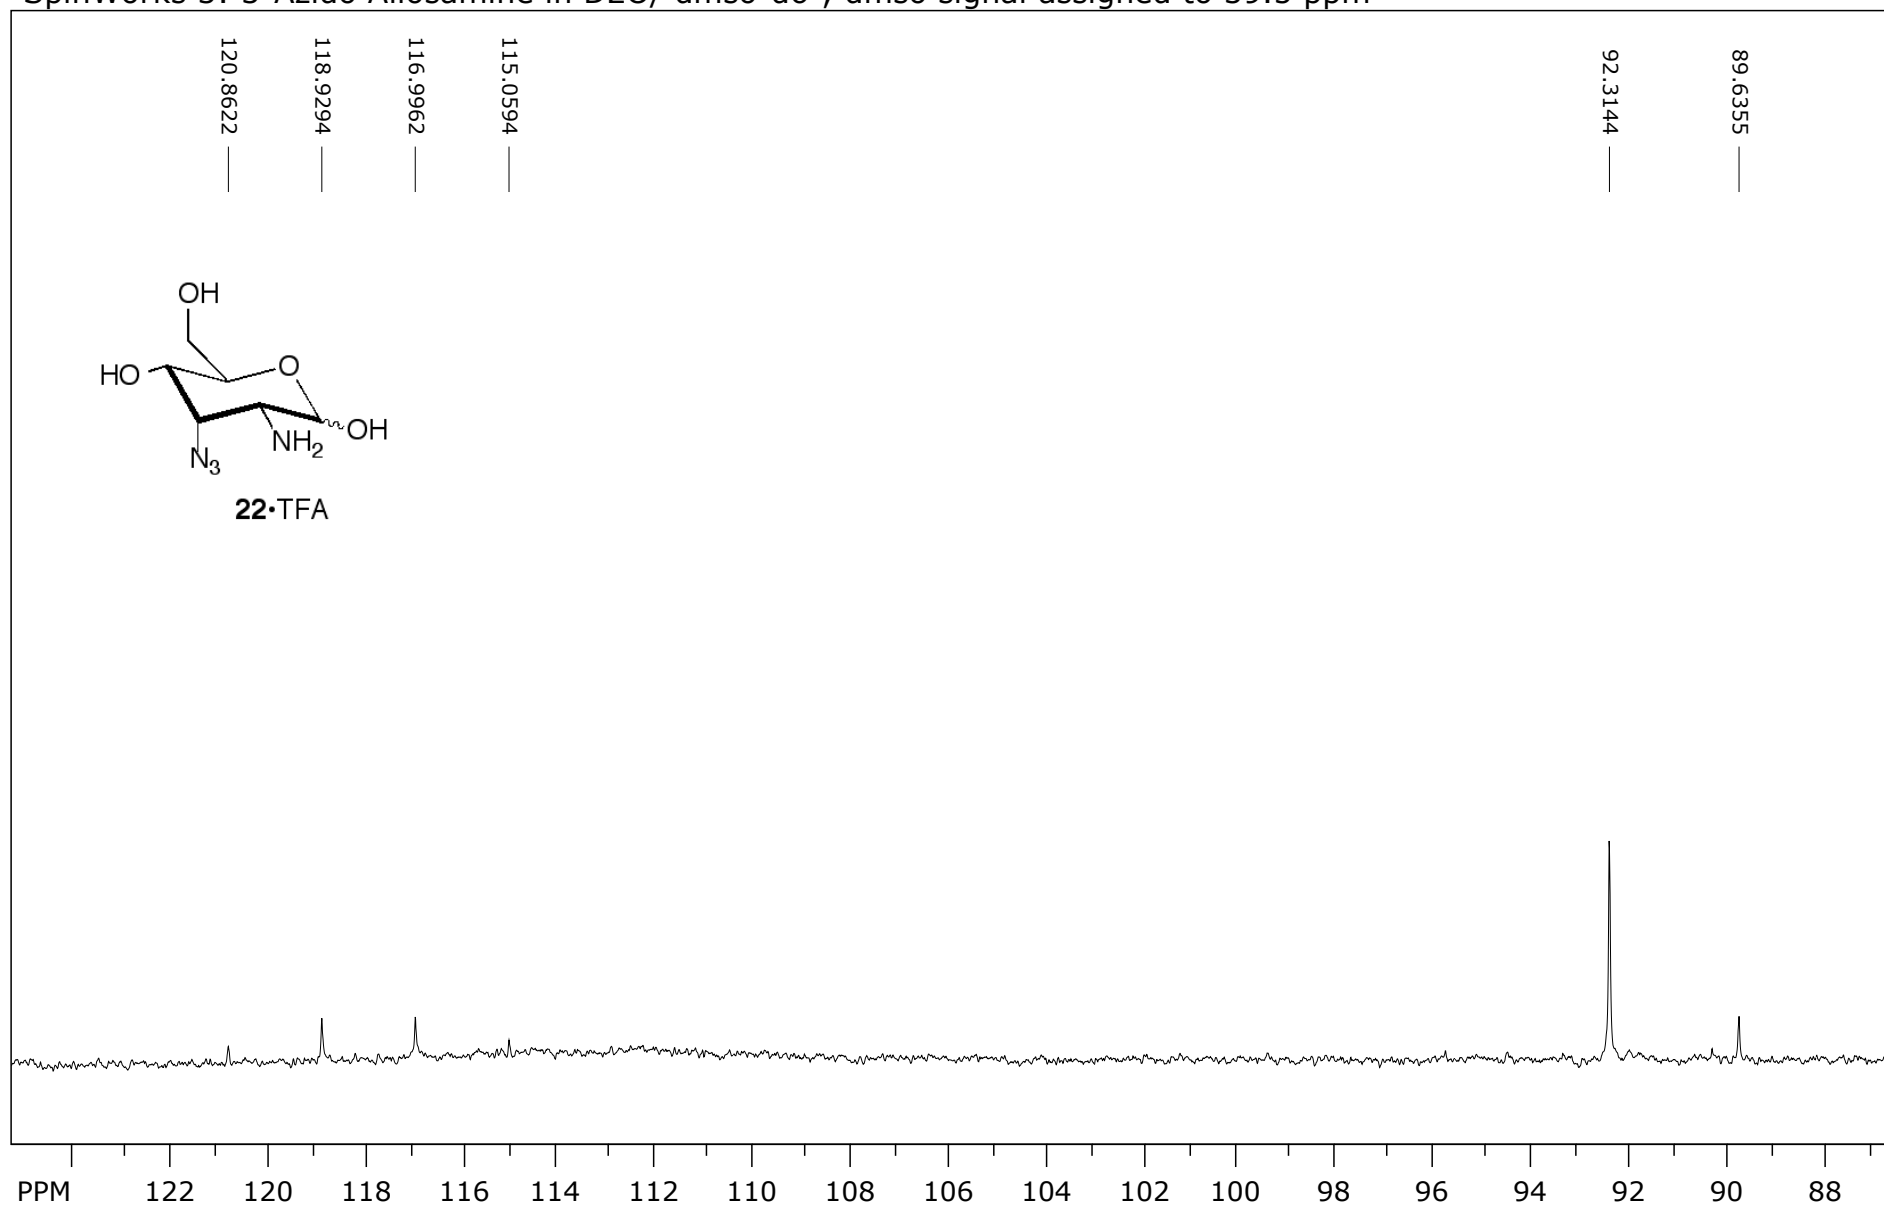

file: ...minoallose\_DprotD\_D2Odmso13C\1\fid expt: <zpgg30>  
transmitter freq.: 151.023519 MHz  
time domain size: 65536 points  
width: 36057.69 Hz = 238.7555 ppm = 0.550197 Hz/pt  
number of scans: 30720

freq. of 0 ppm: 151.008169 MHz  
processed size: 32768 complex points  
LB: 5.000 GF: 0.0000  
Hz/cm: 235.019 ppm/cm: 1.55617

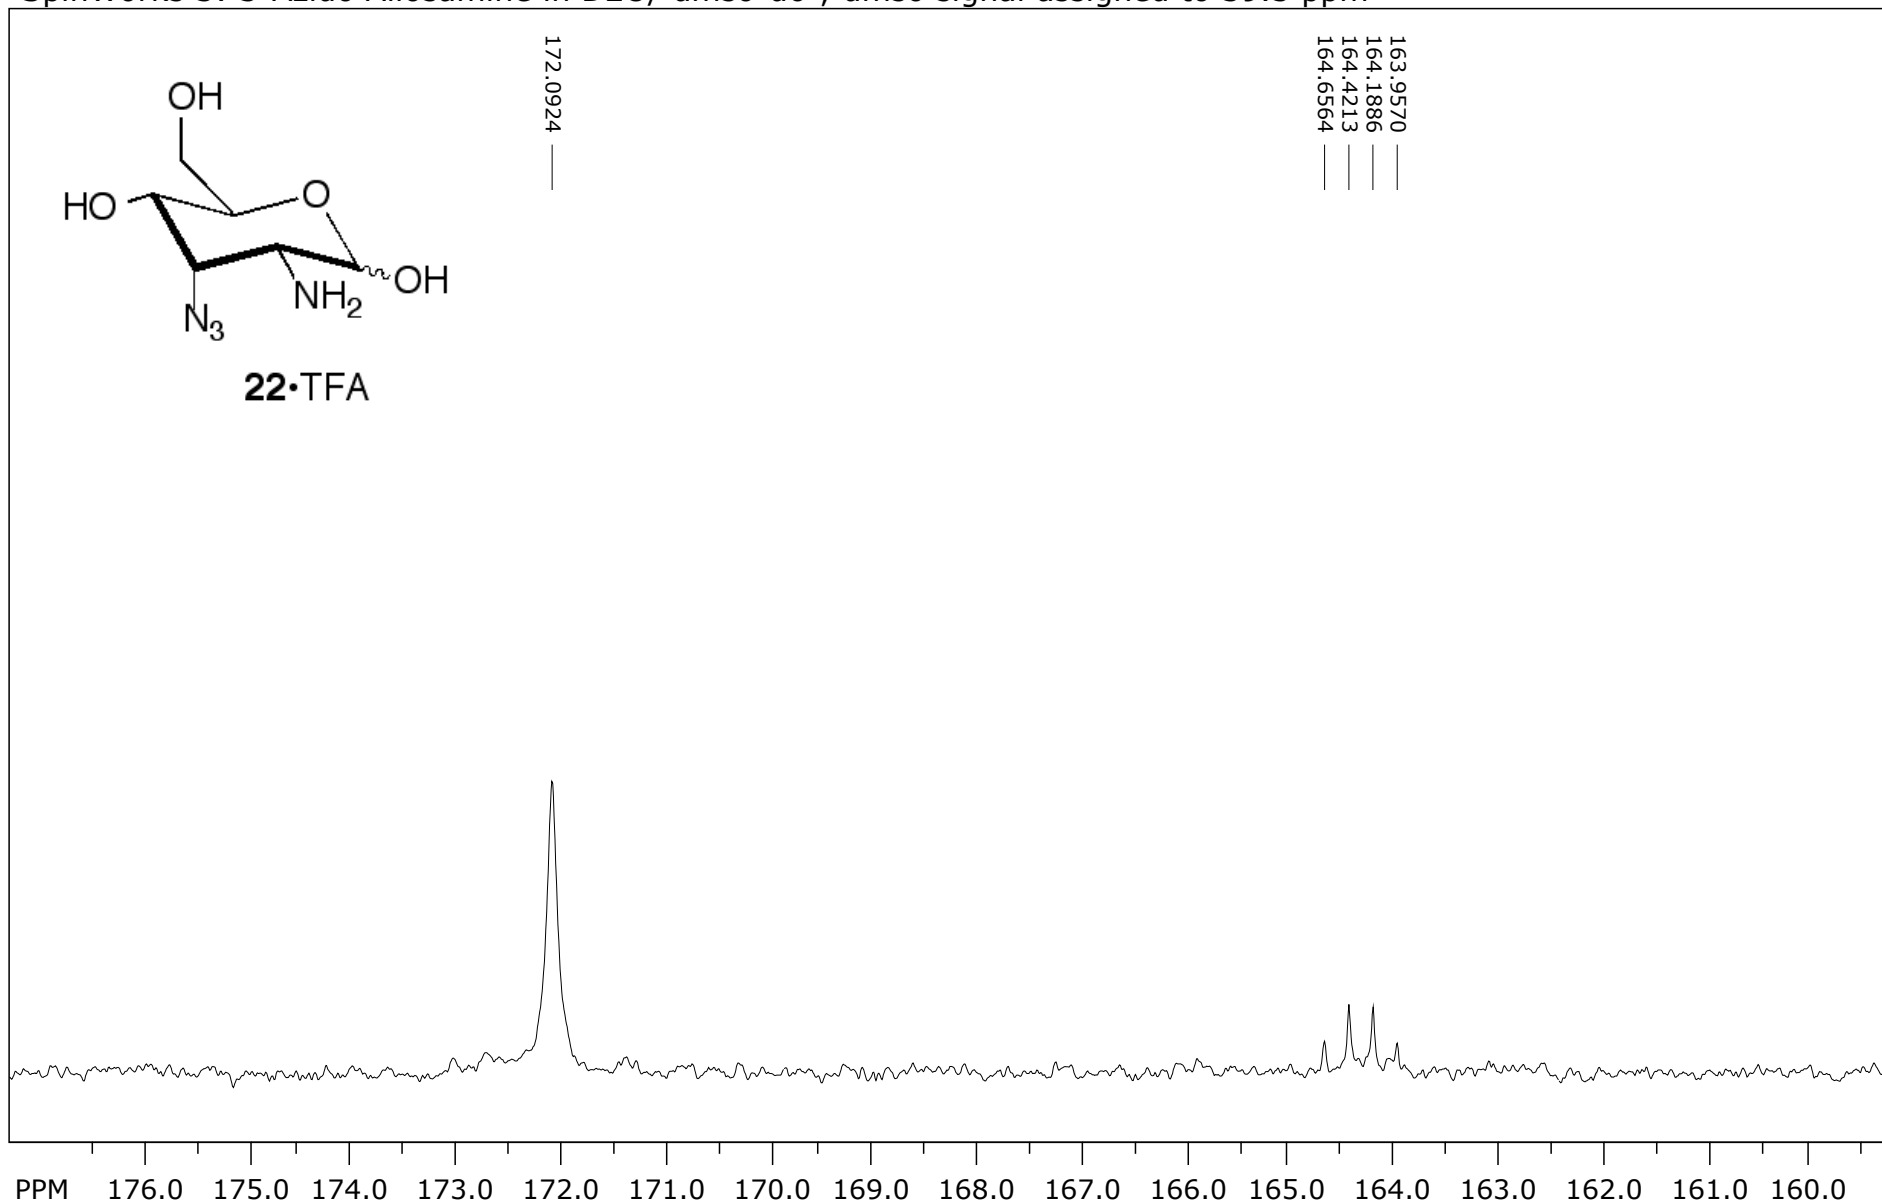

file: ...minoallose\_DprotD\_D2Odmso13C\1\fid expt: <zpgg30>  
transmitter freq.: 151.023519 MHz  
time domain size: 65536 points  
width: 36057.69 Hz = 238.7555 ppm = 0.550197 Hz/pt  
number of scans: 30720

freq. of 0 ppm: 151.008169 MHz  
processed size: 32768 complex points  
LB: 5.000 GF: 0.0000  
Hz/cm: 109.461 ppm/cm: 0.72479



|               |                      |             |                      |                 |              |                        |                       |
|---------------|----------------------|-------------|----------------------|-----------------|--------------|------------------------|-----------------------|
| Sample Name   | Jeff 13              | Position    | Vial 13              | Instrument Name | Instrument 1 | User Name              | DYL                   |
| Inj Vol       | 1                    | InjPosition |                      | SampleType      | Unknown      | IRM Calibration Status | Success               |
| Data Filename | Direct_Vial 13_Jeff. | ACQ Method  | Direct_small mol_Jef | Comment         |              | Acquired Time          | 8/17/2012 11:36:28 AM |

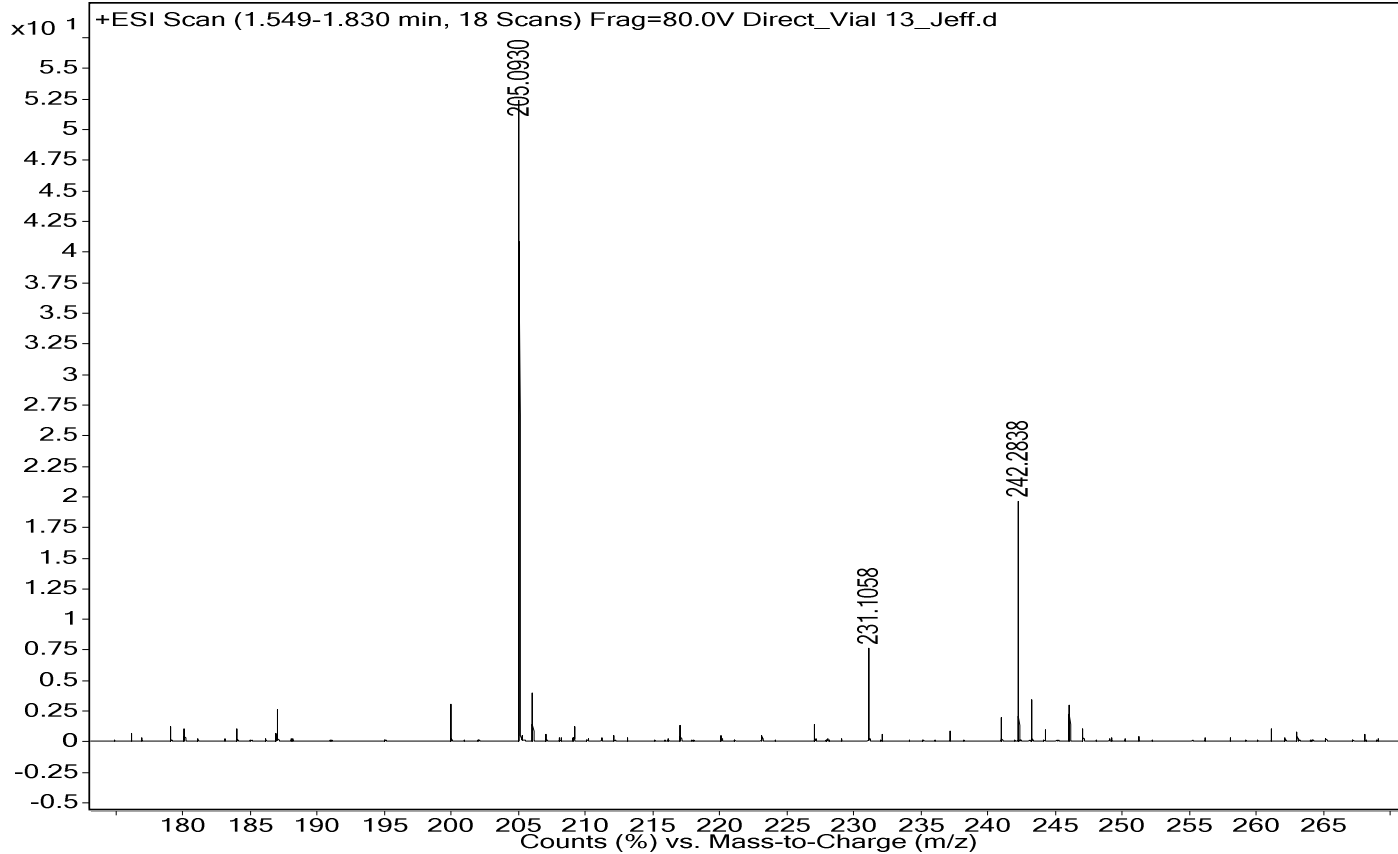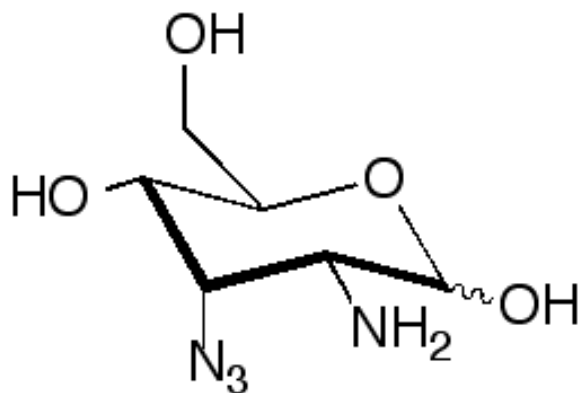**22-TFA**

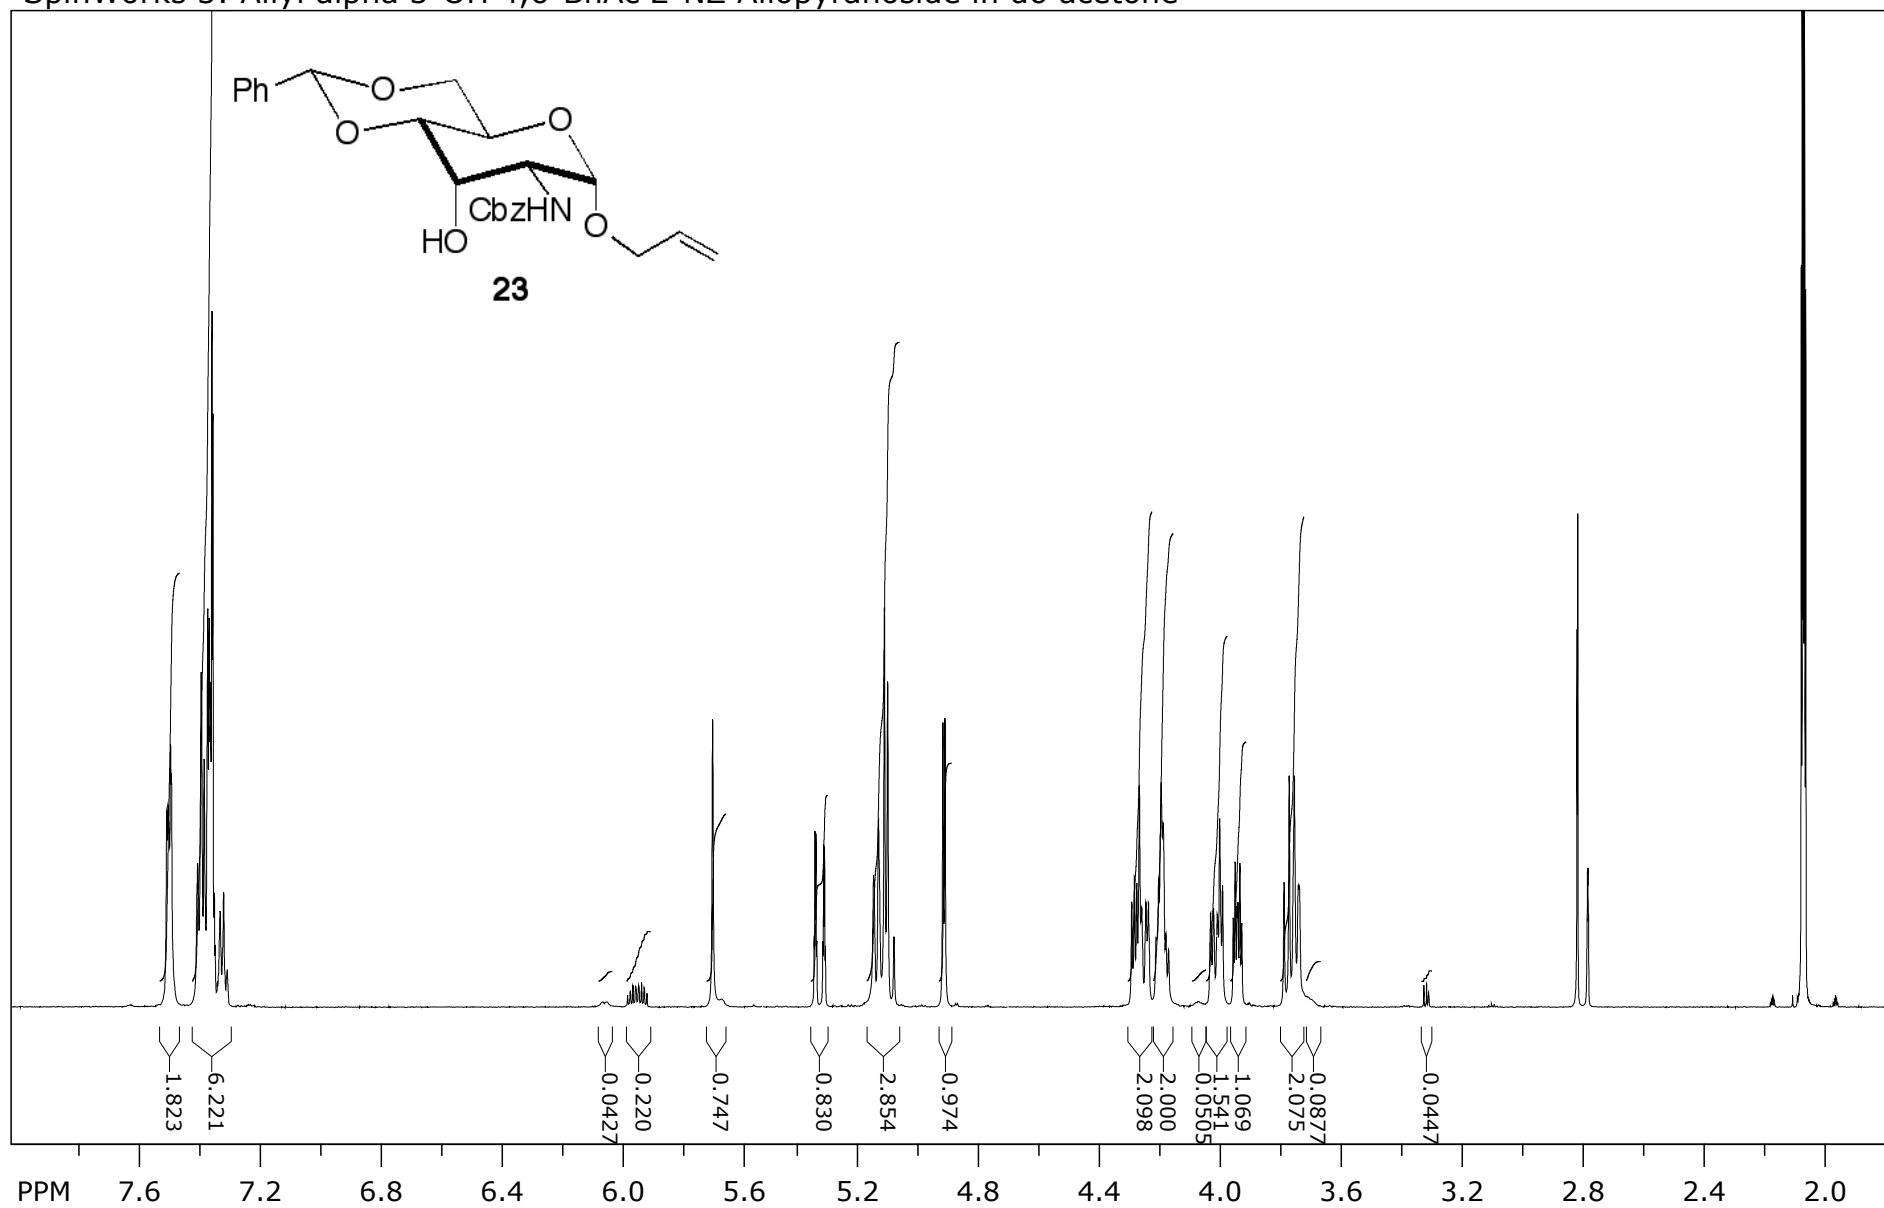

file: ...alphaBnAc\_d6acetone\_MeOHrext\1\fid expt: <zgpr>  
transmitter freq.: 600.553538 MHz  
time domain size: 65536 points  
width: 8417.51 Hz = 14.0162 ppm = 0.128441 Hz/pt  
number of scans: 32

freq. of 0 ppm: 600.550010 MHz  
processed size: 262144 complex points  
LB: 0.000 GF: 0.0000  
Hz/cm: 150.688 ppm/cm: 0.25092

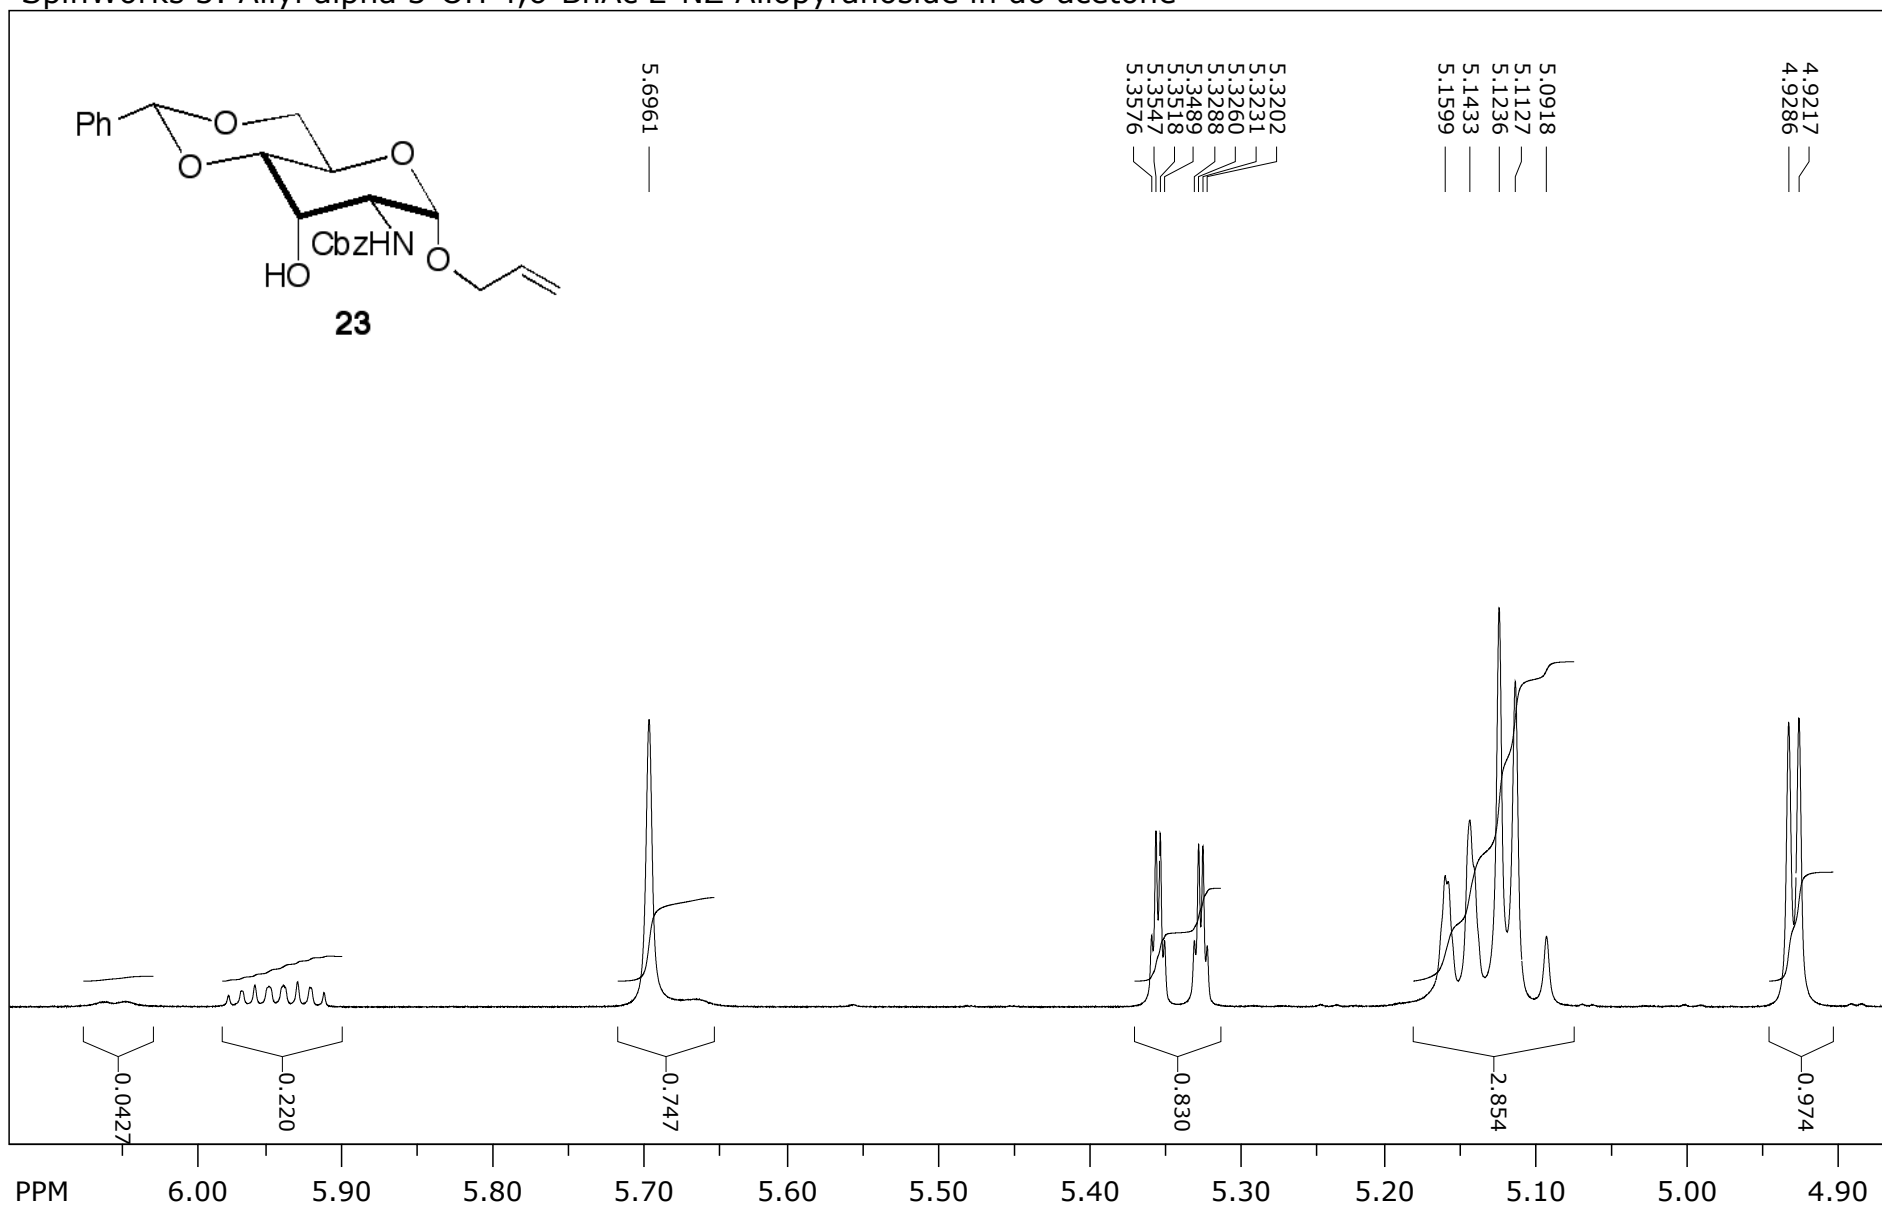

file: ...alphaBnAc\_d6acetone\_MeOHrect\1\fid expt: <zgpr>  
transmitter freq.: 600.553538 MHz  
time domain size: 65536 points  
width: 8417.51 Hz = 14.0162 ppm = 0.128441 Hz/pt  
number of scans: 32

freq. of 0 ppm: 600.550010 MHz  
processed size: 262144 complex points  
LB: 0.000 GF: 0.0000  
Hz/cm: 30.448 ppm/cm: 0.05070

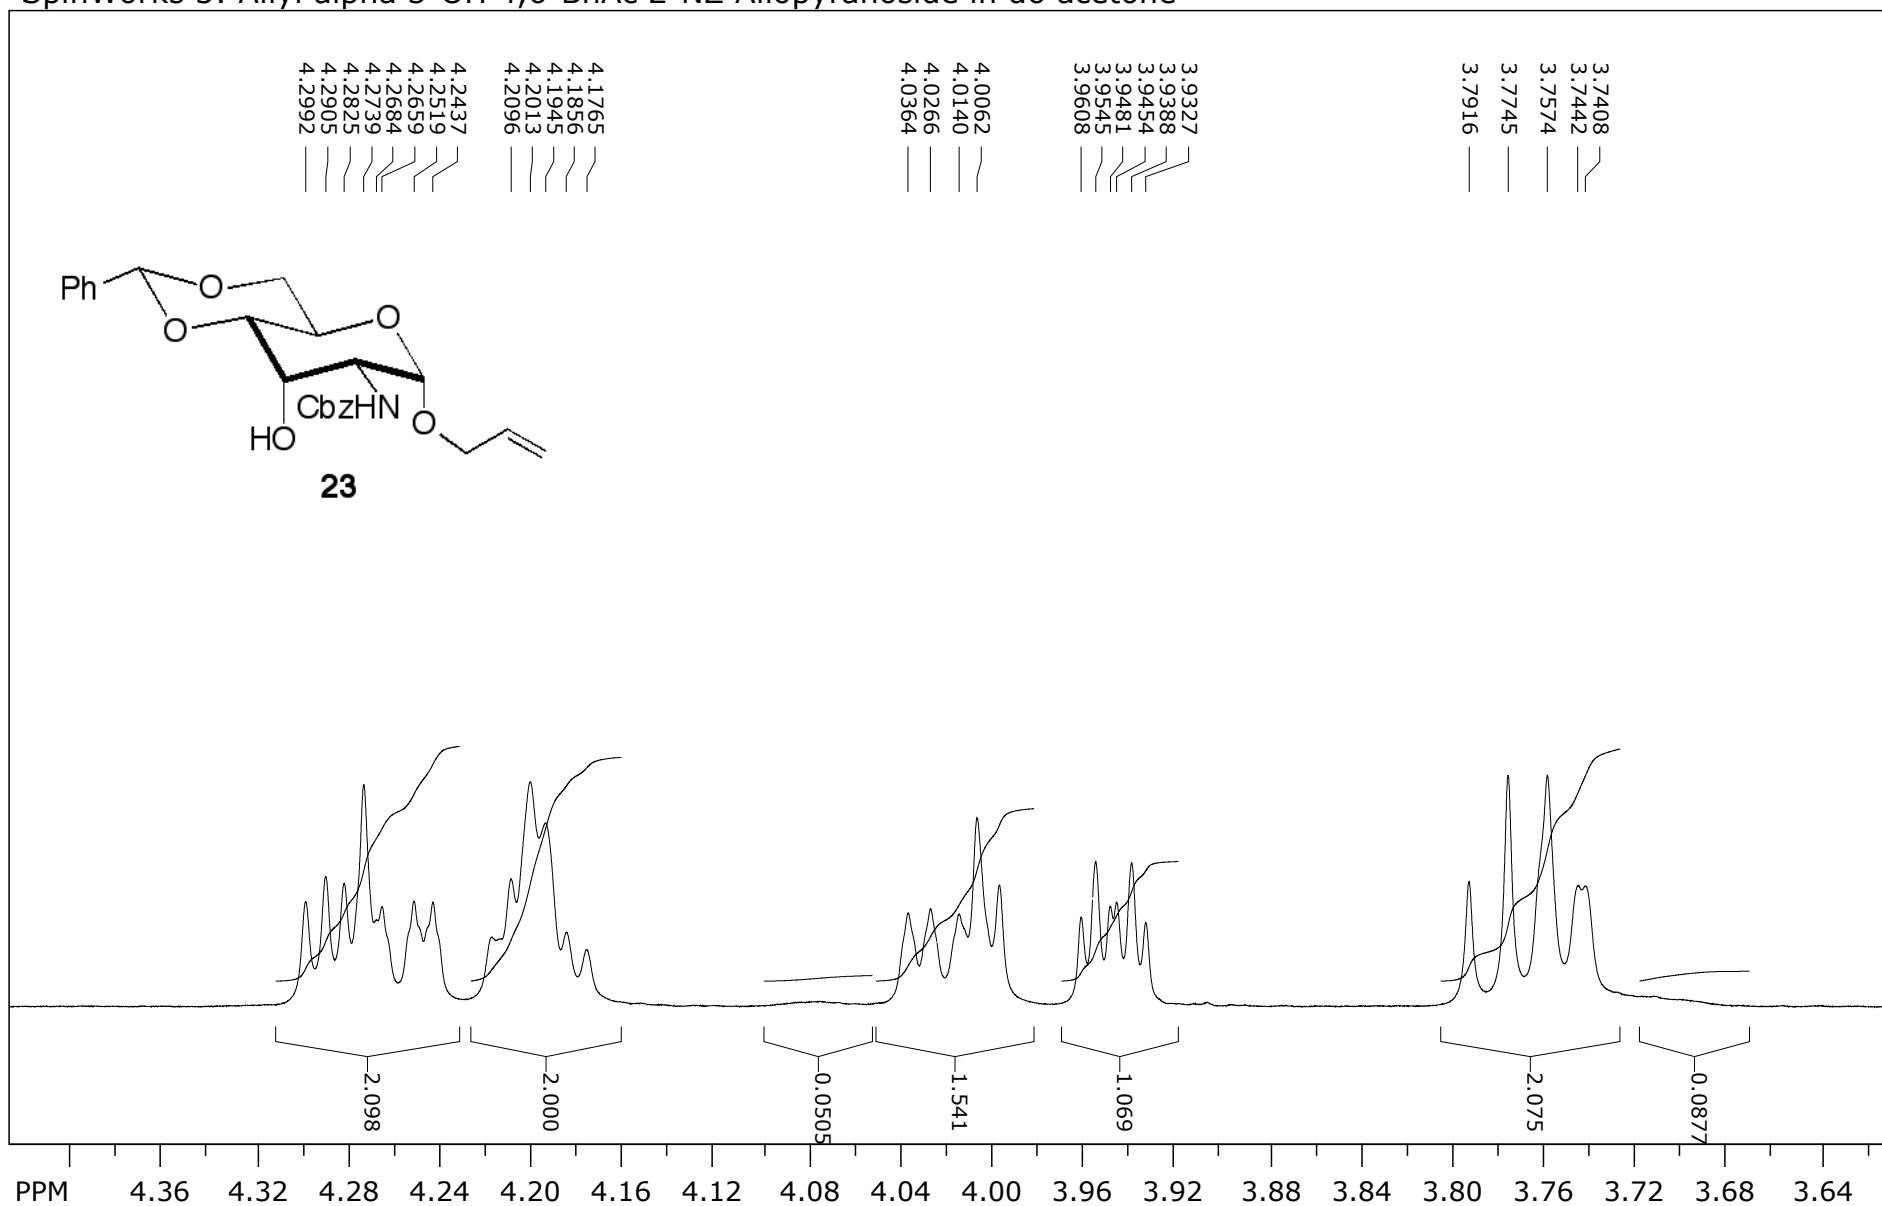

file: ...alphaBnAc\_d6acetone\_MeOHrext\1\fid expt: <zgpr>  
 transmitter freq.: 600.553538 MHz  
 time domain size: 65536 points  
 width: 8417.51 Hz = 14.0162 ppm = 0.128441 Hz/pt  
 number of scans: 32

freq. of 0 ppm: 600.550010 MHz  
 processed size: 262144 complex points  
 LB: 0.000 GF: 0.0000  
 Hz/cm: 19.729 ppm/cm: 0.03285

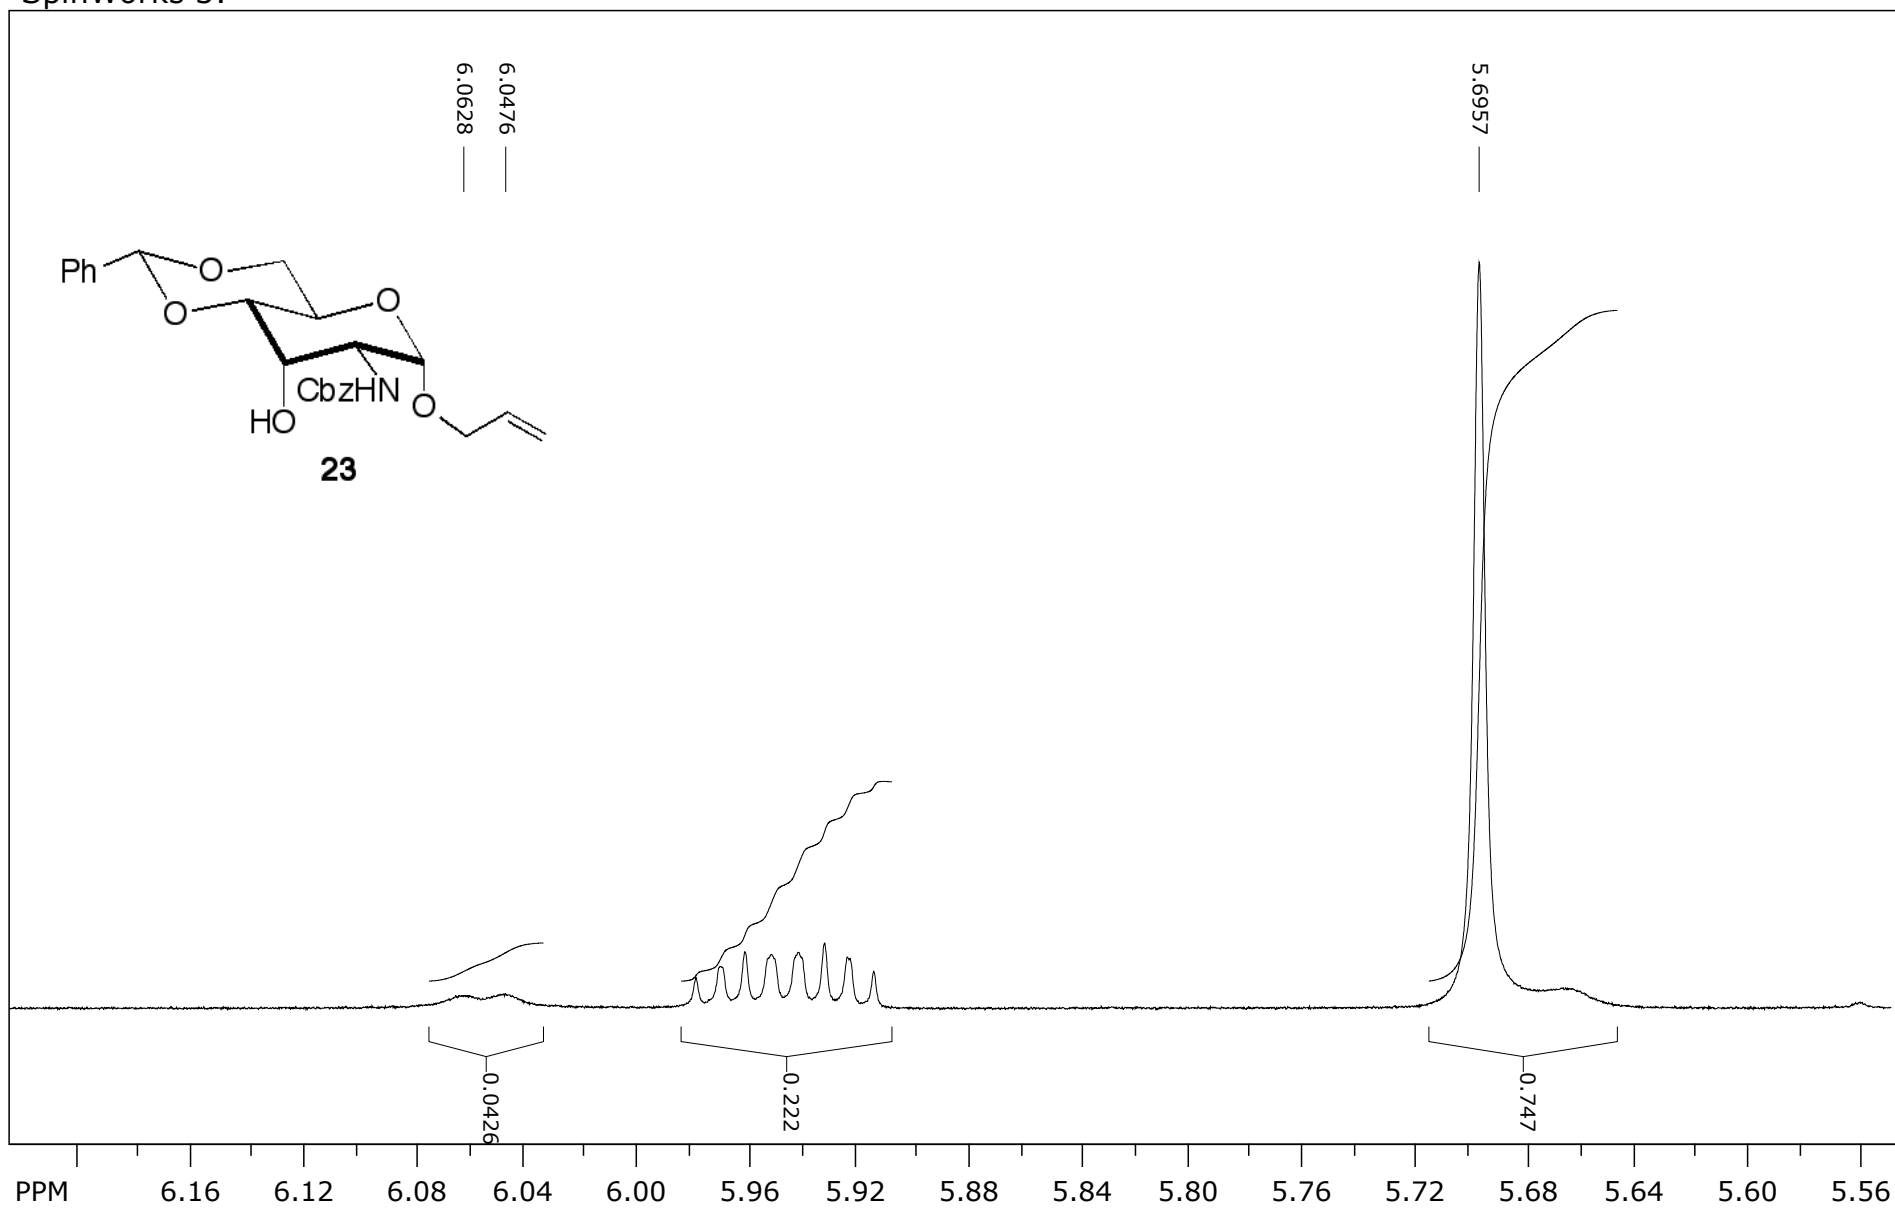

file: ...alphaBnAc\_d6acetone\_MeOHrext\1\fid expt: <zgpr>  
transmitter freq.: 600.553538 MHz  
time domain size: 65536 points  
width: 8417.51 Hz = 14.0162 ppm = 0.128441 Hz/pt  
number of scans: 32

freq. of 0 ppm: 600.550010 MHz  
processed size: 262144 complex points  
LB: 0.000 GF: 0.0000  
Hz/cm: 16.347 ppm/cm: 0.02722

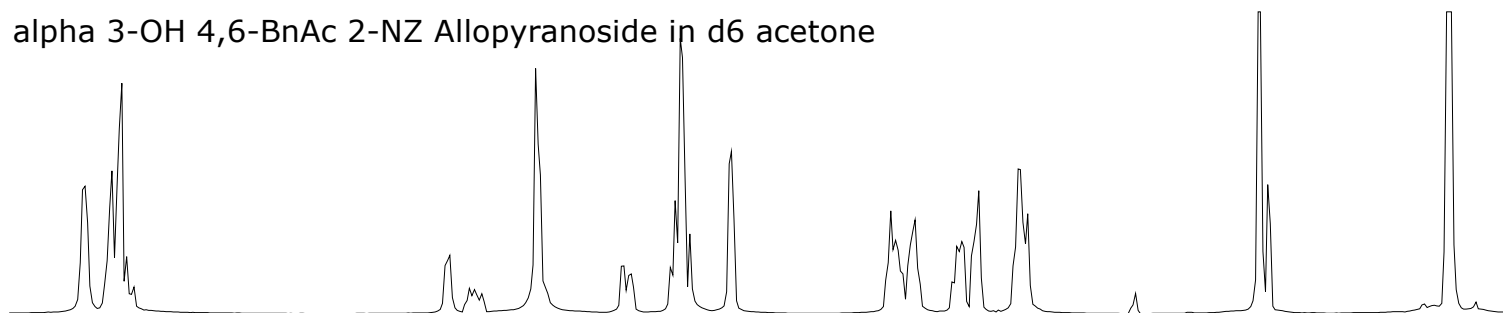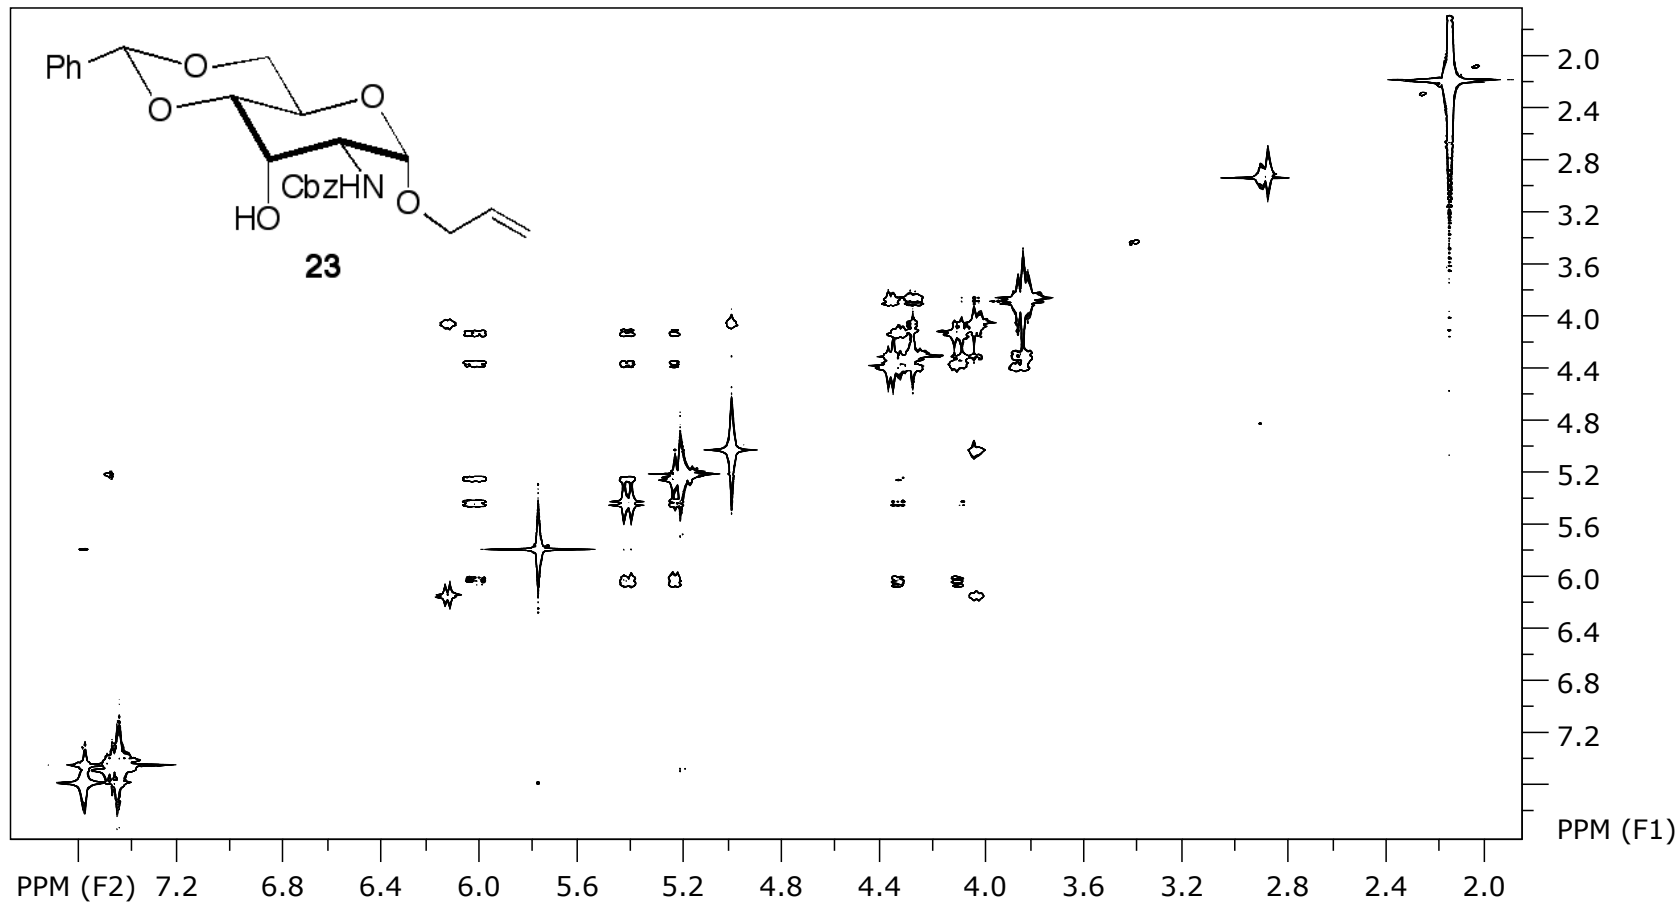

file: ...alphaBnAc6acet\_MeOHrextCOSY\1\ser  
expt: <cosygpqf>  
transmitter freq: 600.552832 MHz  
time domain size: 2048 by 2048 points  
width (F2): 6009.62 Hz = 10.0068 ppm = 2.9344 Hz/pt  
number of scans: 8

F2: freq. of 0 ppm: 600.5499623 MHz  
processed size: 1024 complex points  
window function: Sine  
shift: 0.0 degrees  
Hz/cm: 180.252 ppm/cm: 0.30014

F1: freq. of 0 ppm: 600.5499623 MHz  
processed size: 1024 complex points  
window function: Sine  
shift: 0.0 degrees  
Hz/cm: 348.787 ppm/cm: 0.58078

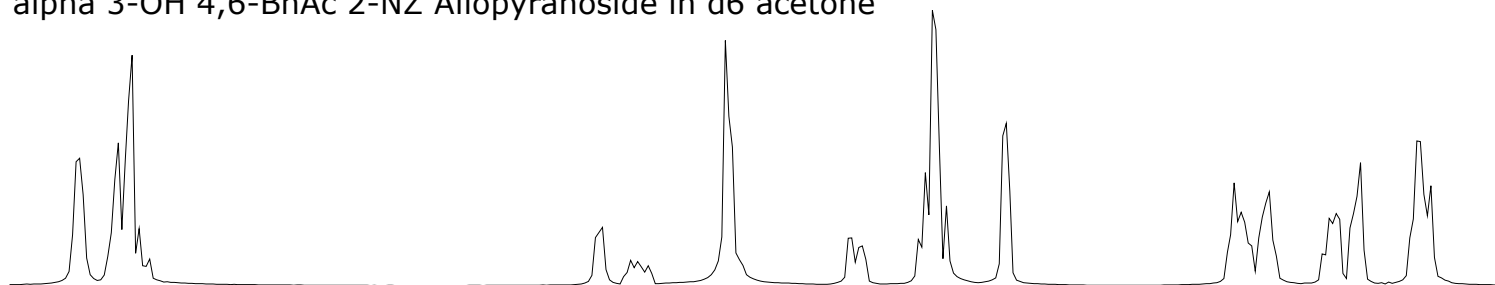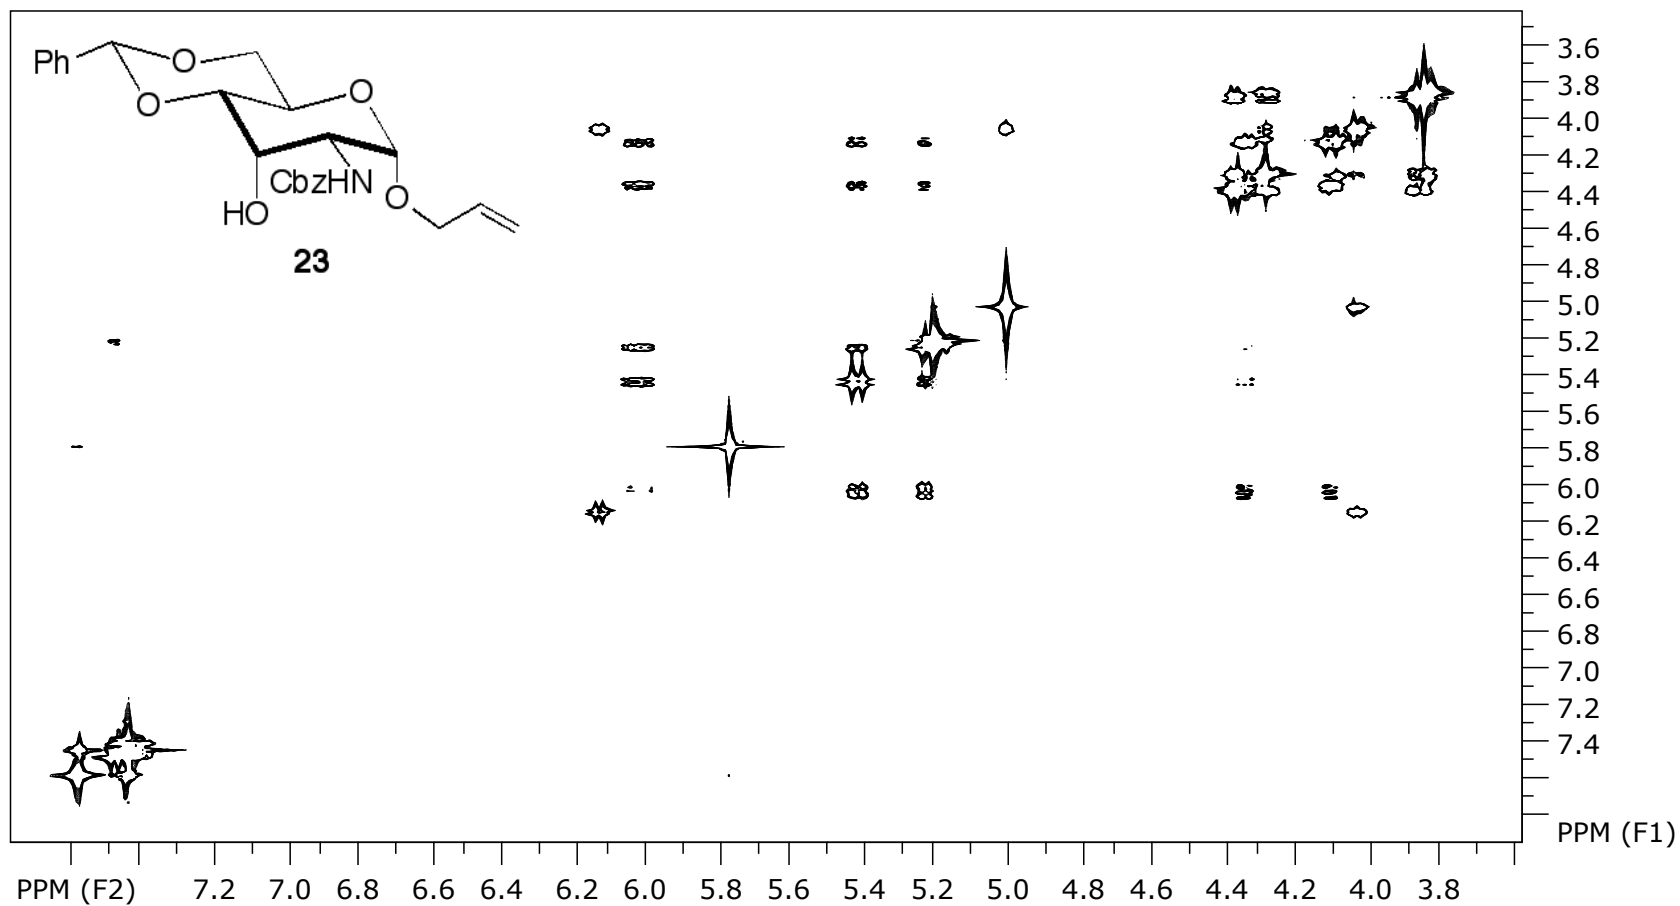

file: ...alphaBnAc6acet\_MeOHrextCOSY\1\ser  
 expt: <cosygpqf>  
 transmitter freq: 600.552832 MHz  
 time domain size: 2048 by 2048 points  
 width (F2): 6009.62 Hz = 10.0068 ppm = 2.9344 Hz/pt  
 number of scans: 8

F2: freq. of 0 ppm: 600.5499623 MHz  
 processed size: 1024 complex points  
 window function: Sine  
 shift: 0.0 degrees  
 Hz/cm: 125.763 ppm/cm: 0.20941

F1: freq. of 0 ppm: 600.5499623 MHz  
 processed size: 1024 complex points  
 window function: Sine  
 shift: 0.0 degrees  
 Hz/cm: 247.836 ppm/cm: 0.41268

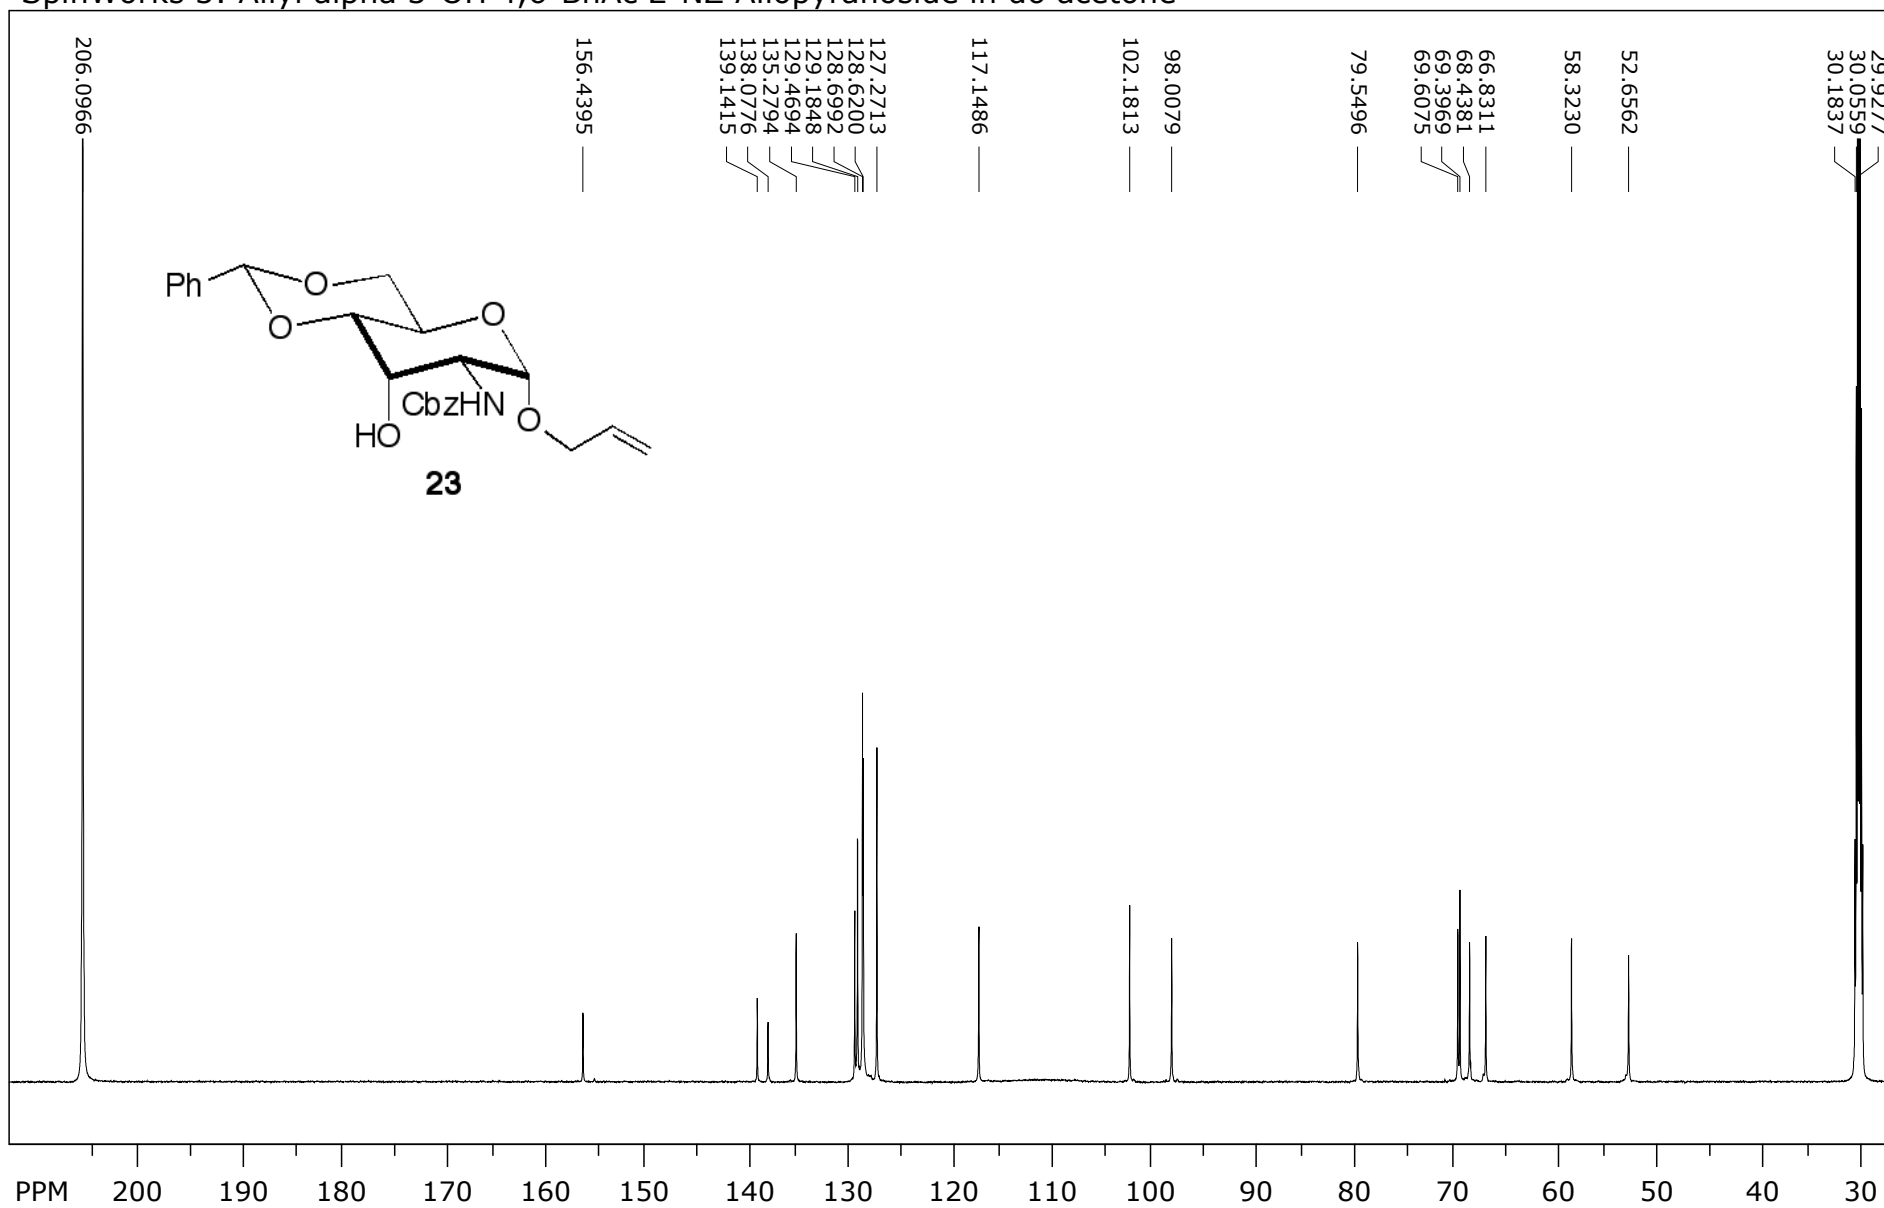

file: ...alphaBnAc6acet\_MeOHrxt\_C13\1\fid expt: <zpgg30>  
transmitter freq.: 151.023519 MHz  
time domain size: 65536 points  
width: 36057.69 Hz = 238.7555 ppm = 0.550197 Hz/pt  
number of scans: 34816

freq. of 0 ppm: 151.008293 MHz  
processed size: 32768 complex points  
LB: 5.000 GF: 0.0000  
Hz/cm: 1128.413 ppm/cm: 7.47177



|               |                      |             |                      |                 |              |                        |                      |
|---------------|----------------------|-------------|----------------------|-----------------|--------------|------------------------|----------------------|
| Sample Name   | Jeff 44              | Position    | Vial 44              | Instrument Name | Instrument 1 | User Name              | DYL                  |
| Inj Vol       | 1                    | InjPosition |                      | SampleType      | Unknown      | IRM Calibration Status | Success              |
| Data Filename | Direct_Vial 44_Jeff. | ACQ Method  | Direct_small mol_Jef | Comment         |              | Acquired Time          | 8/17/2012 2:01:09 PM |

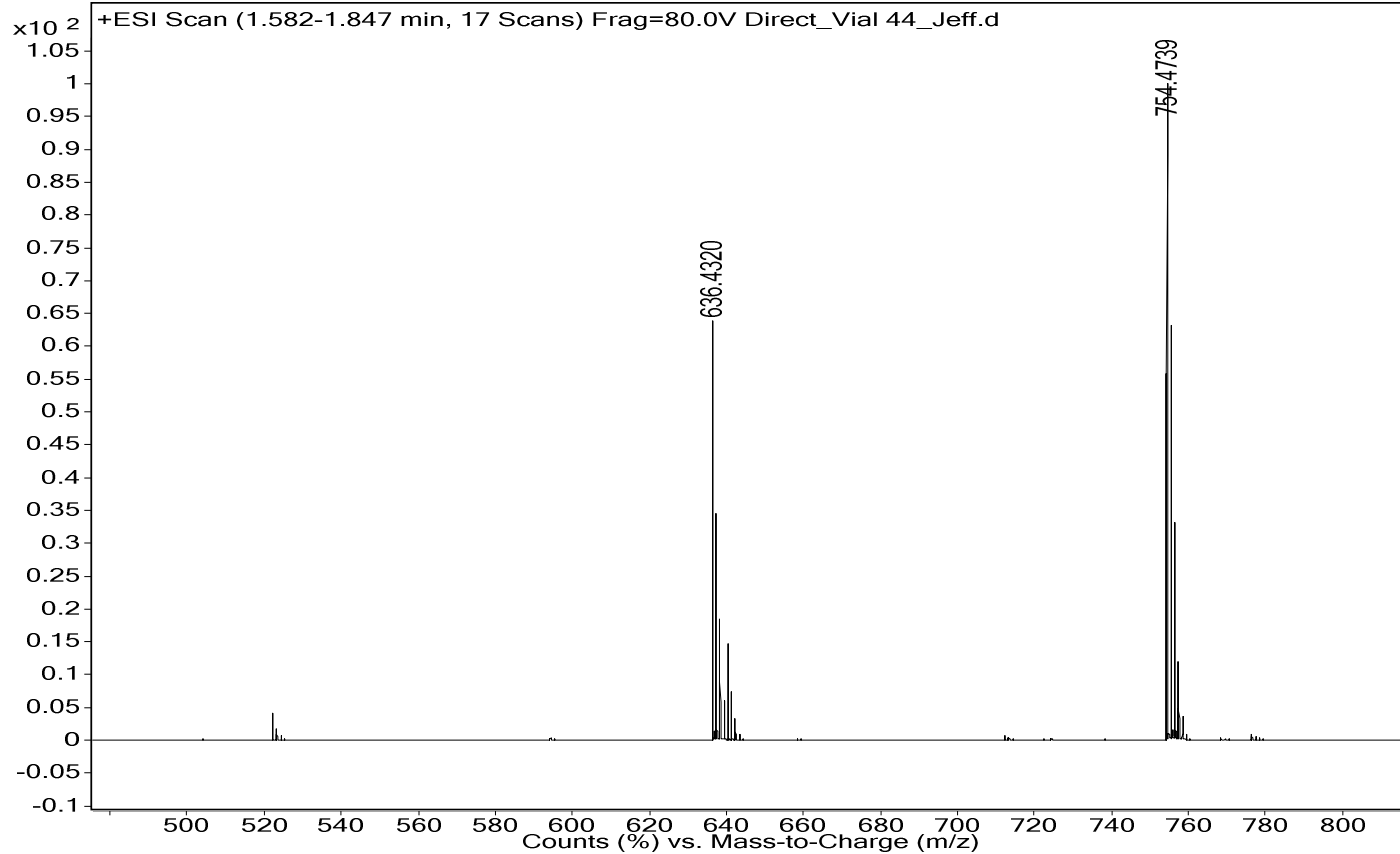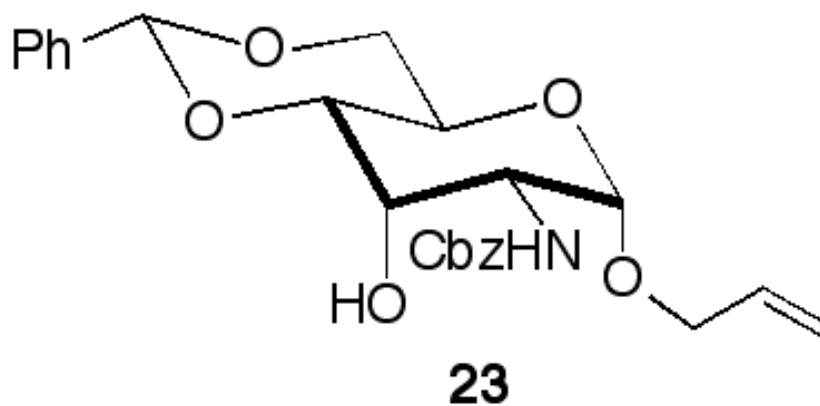

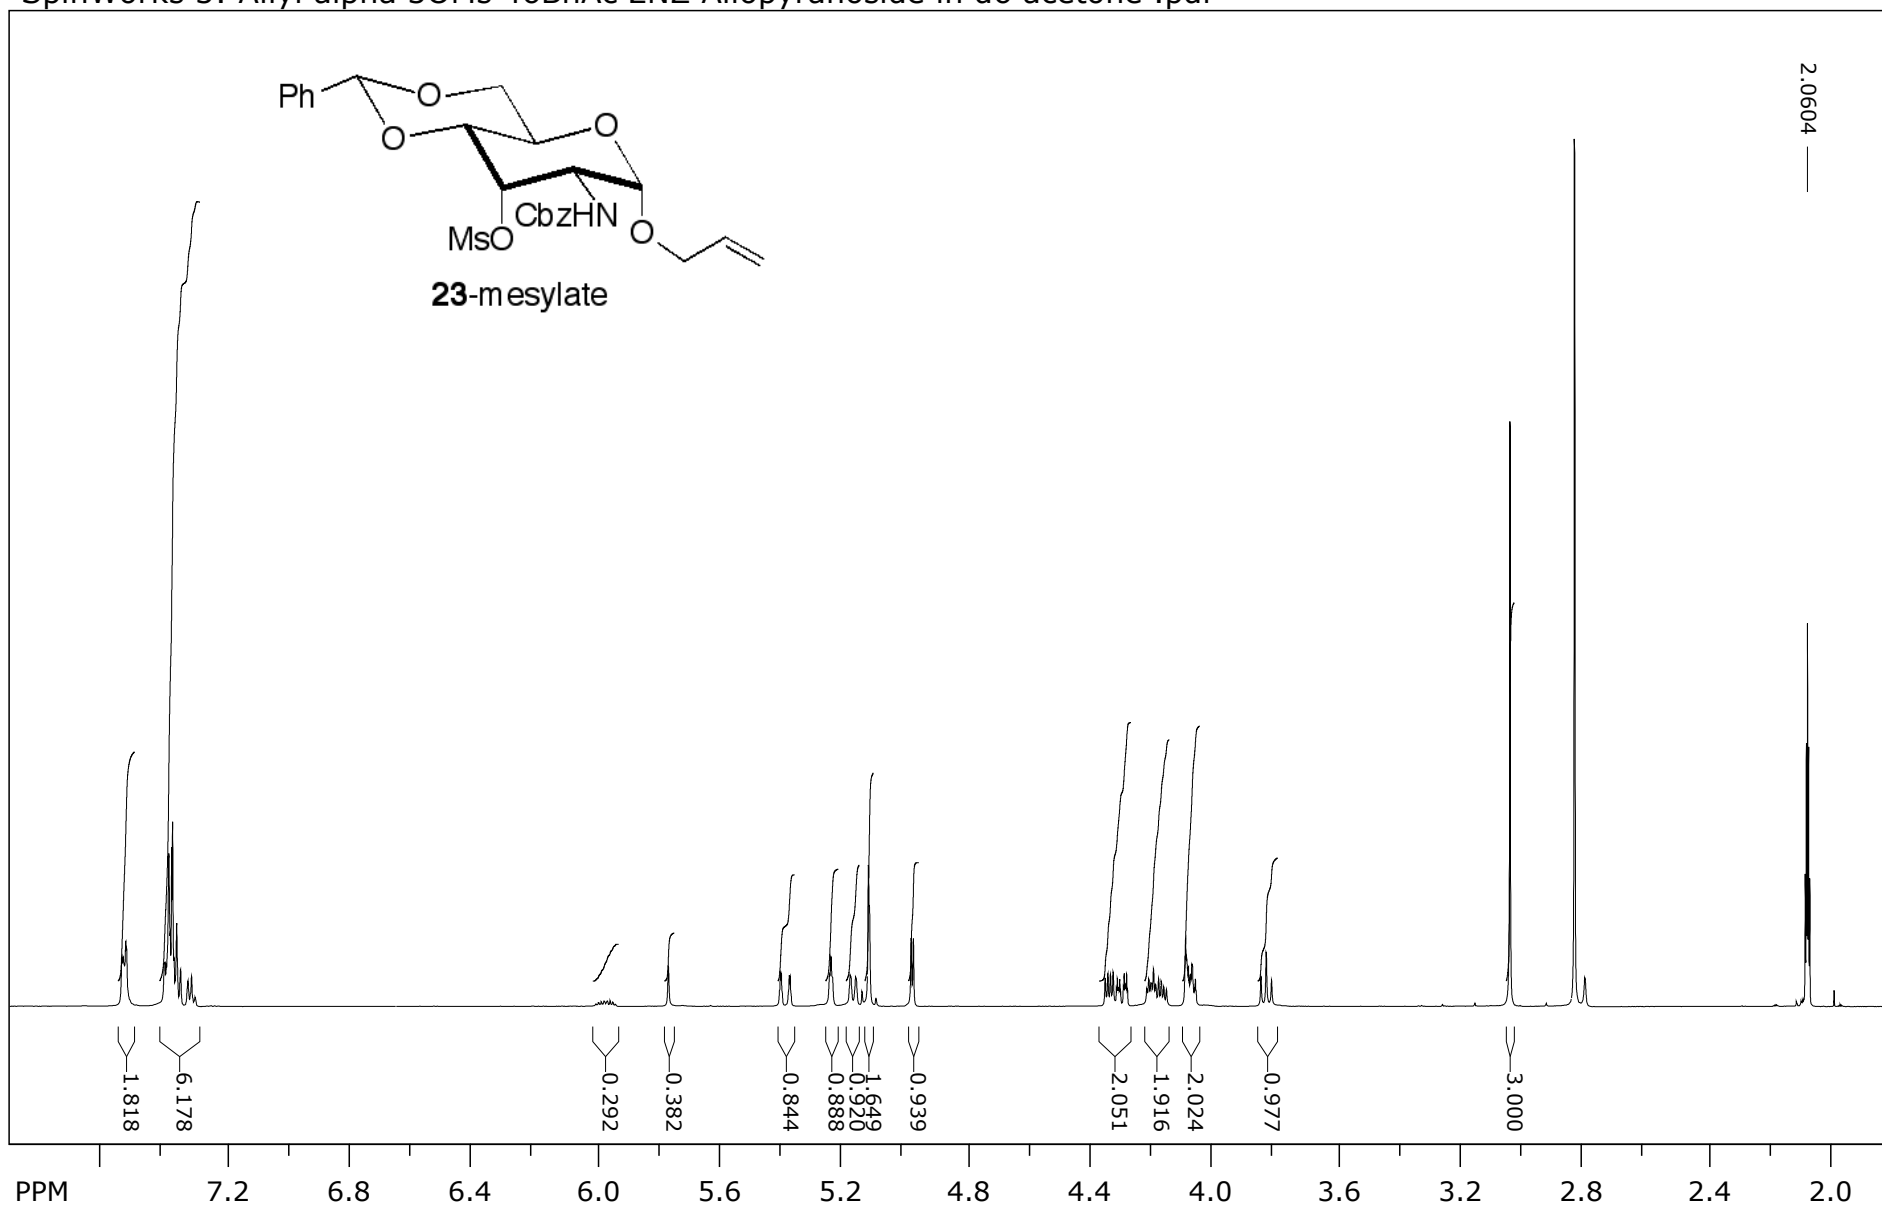

file: ...AllylAlpha3OMsBnAc\_d6acetone\1\fid expt: <zgpr>  
transmitter freq.: 600.553538 MHz  
time domain size: 65536 points  
width: 7211.54 Hz = 12.0082 ppm = 0.110039 Hz/pt  
number of scans: 32

freq. of 0 ppm: 600.550010 MHz  
processed size: 262144 complex points  
LB: 0.000 GF: 0.0000  
Hz/cm: 147.128 ppm/cm: 0.24499

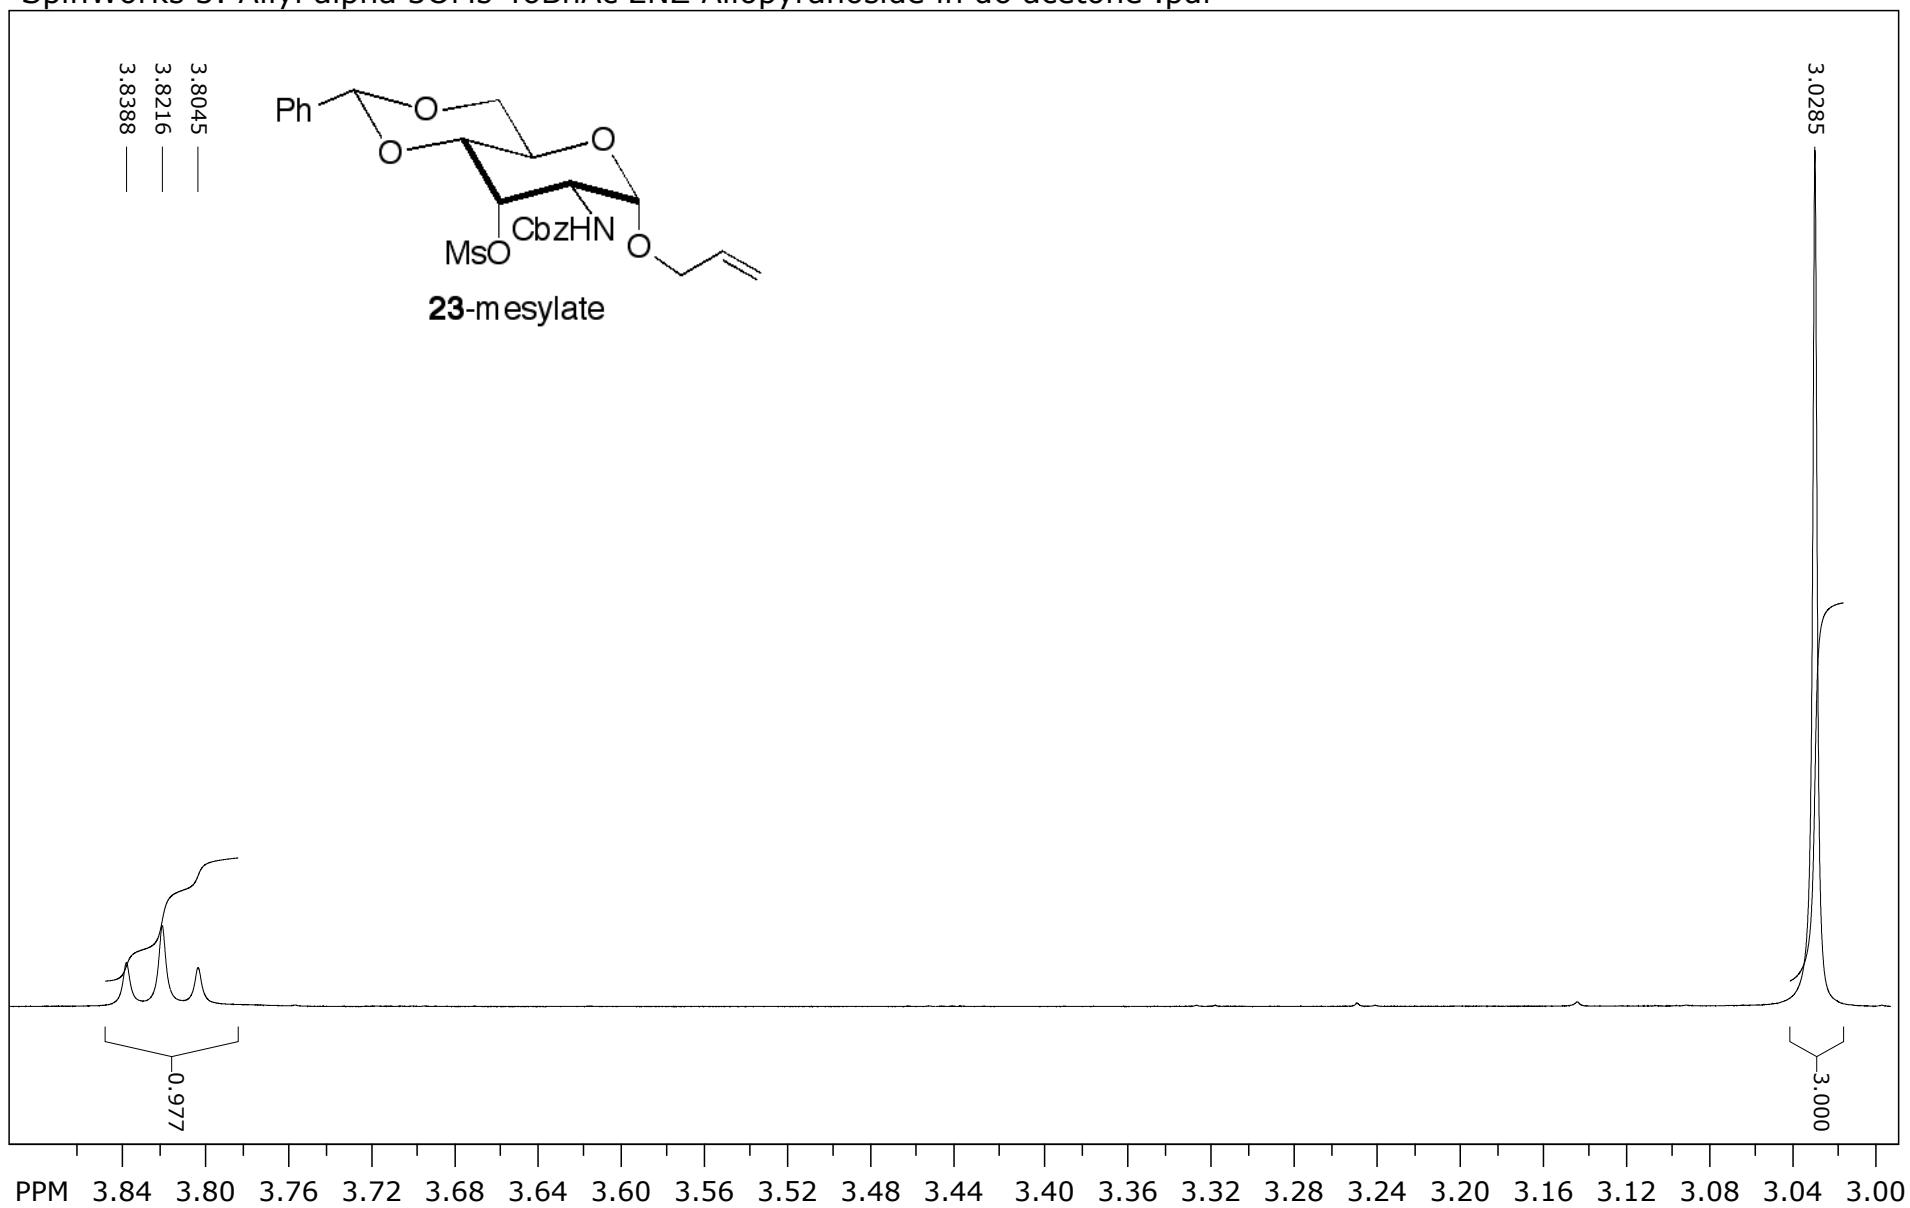

file: ...AllylAlpha3OMsBnAc\_d6acetone\1\fid expt: <zgpr>  
transmitter freq.: 600.553538 MHz  
time domain size: 65536 points  
width: 7211.54 Hz = 12.0082 ppm = 0.110039 Hz/pt  
number of scans: 32

freq. of 0 ppm: 600.550010 MHz  
processed size: 262144 complex points  
LB: 0.000 GF: 0.0000  
Hz/cm: 21.699 ppm/cm: 0.03613

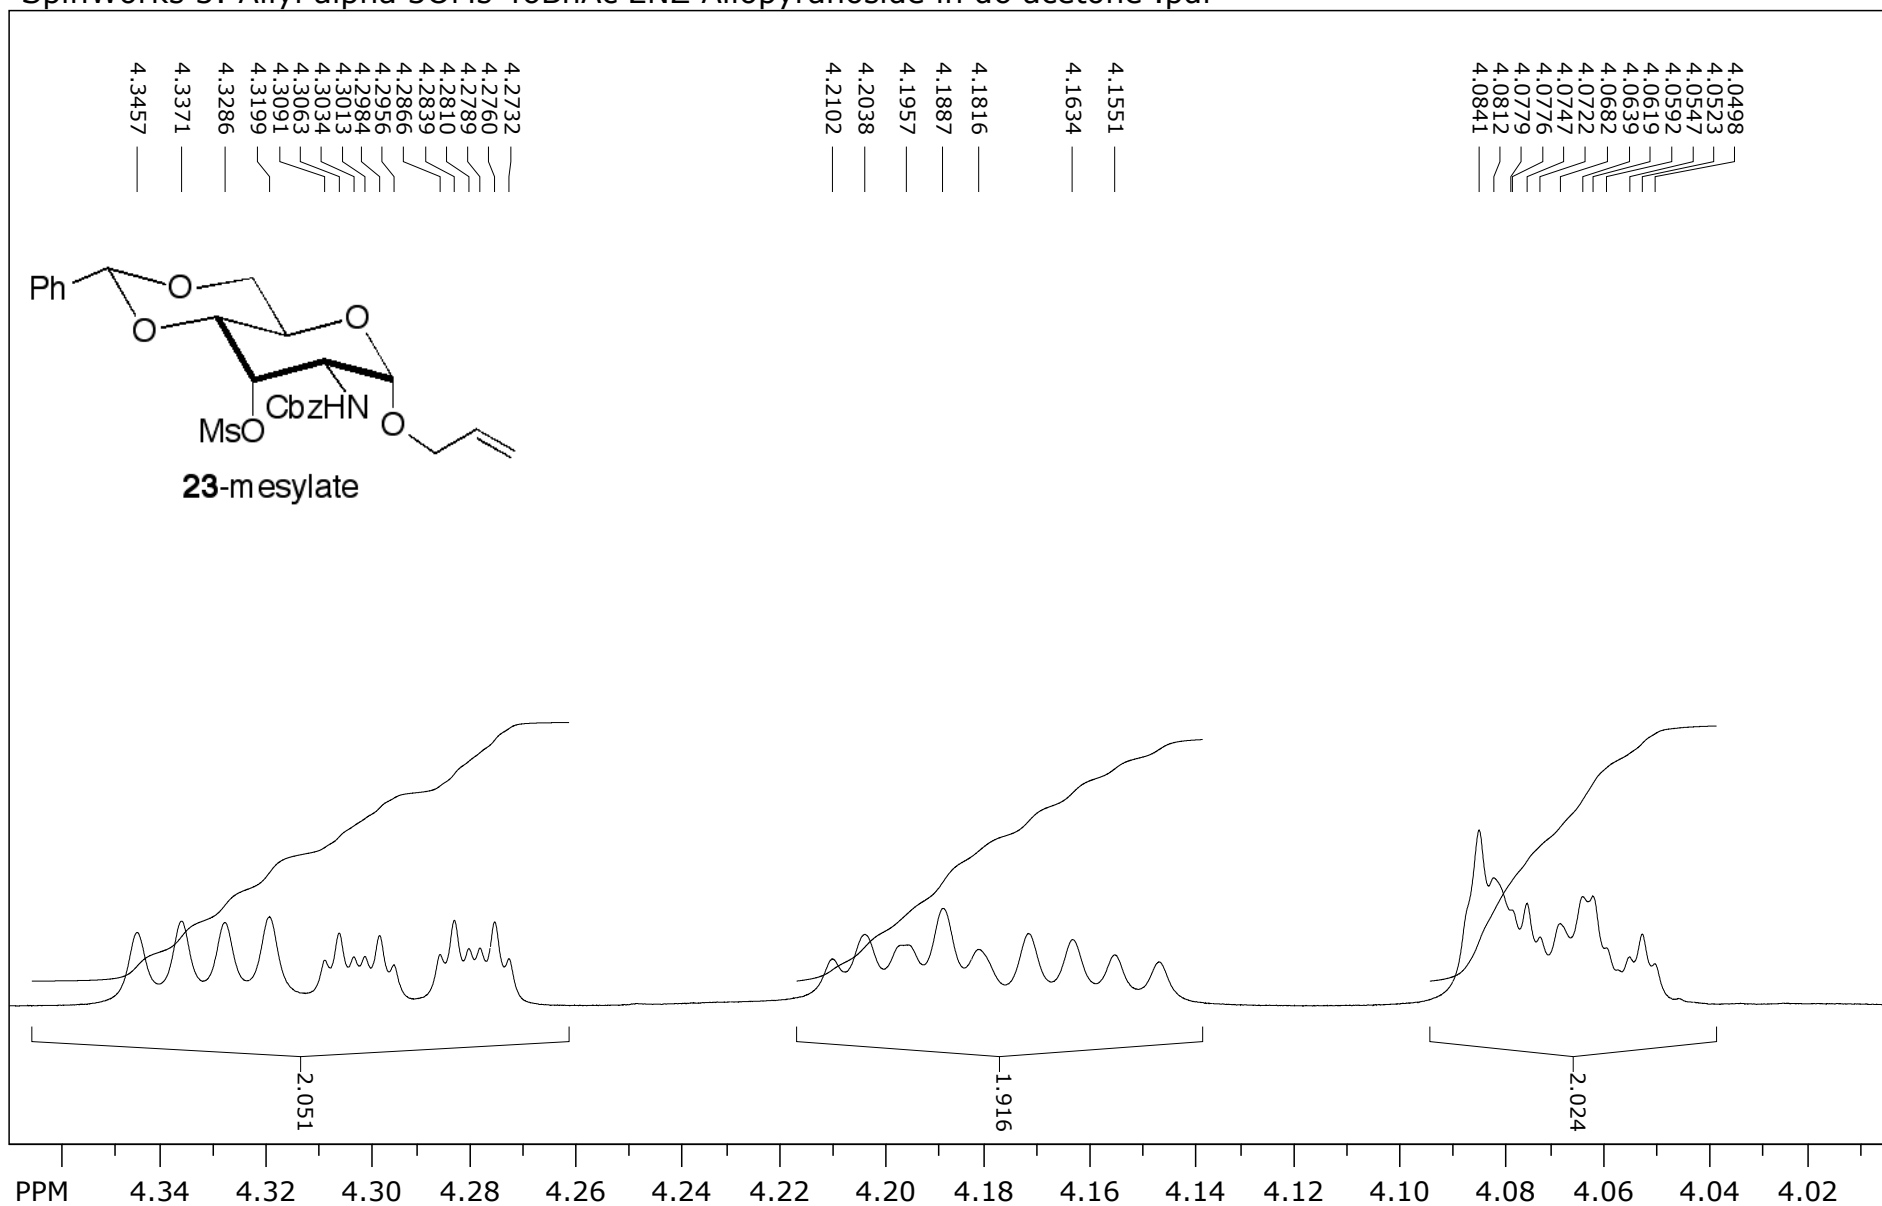

file: ...AllylAlpha3OMsBnAc\_d6acetone\1\fid expt: <zgpr>  
 transmitter freq.: 600.553538 MHz  
 time domain size: 65536 points  
 width: 7211.54 Hz = 12.0082 ppm = 0.110039 Hz/pt  
 number of scans: 32

freq. of 0 ppm: 600.550010 MHz  
 processed size: 262144 complex points  
 LB: 0.000 GF: 0.0000  
 Hz/cm: 8.814 ppm/cm: 0.01468

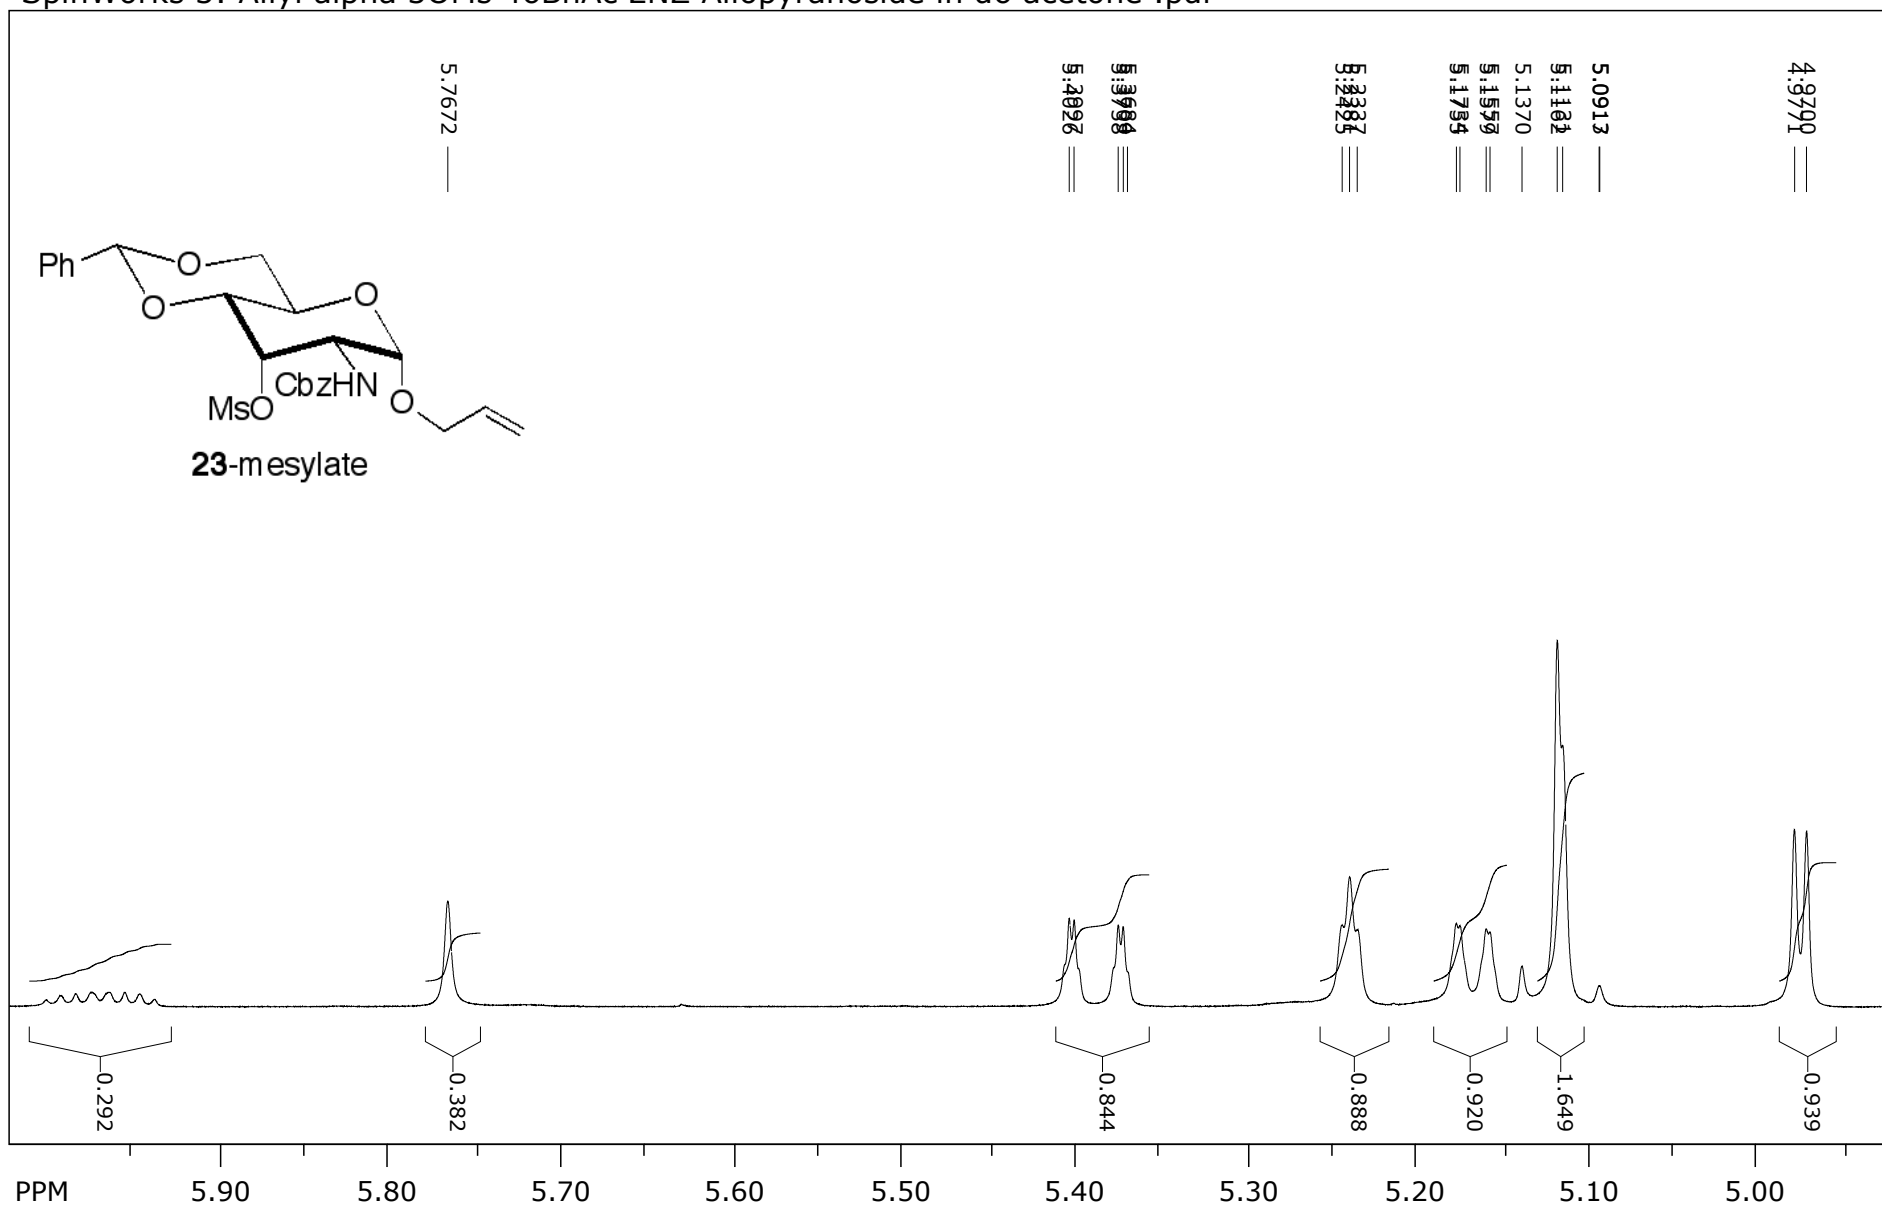

file: ...AllylAlpha3OMsBnAc\_d6acetone\1\fid exp: <zgpr>  
transmitter freq.: 600.553538 MHz  
time domain size: 65536 points  
width: 7211.54 Hz = 12.0082 ppm = 0.110039 Hz/pt  
number of scans: 32

freq. of 0 ppm: 600.550010 MHz  
processed size: 262144 complex points  
LB: 0.000 GF: 0.0000  
Hz/cm: 26.526 ppm/cm: 0.04417

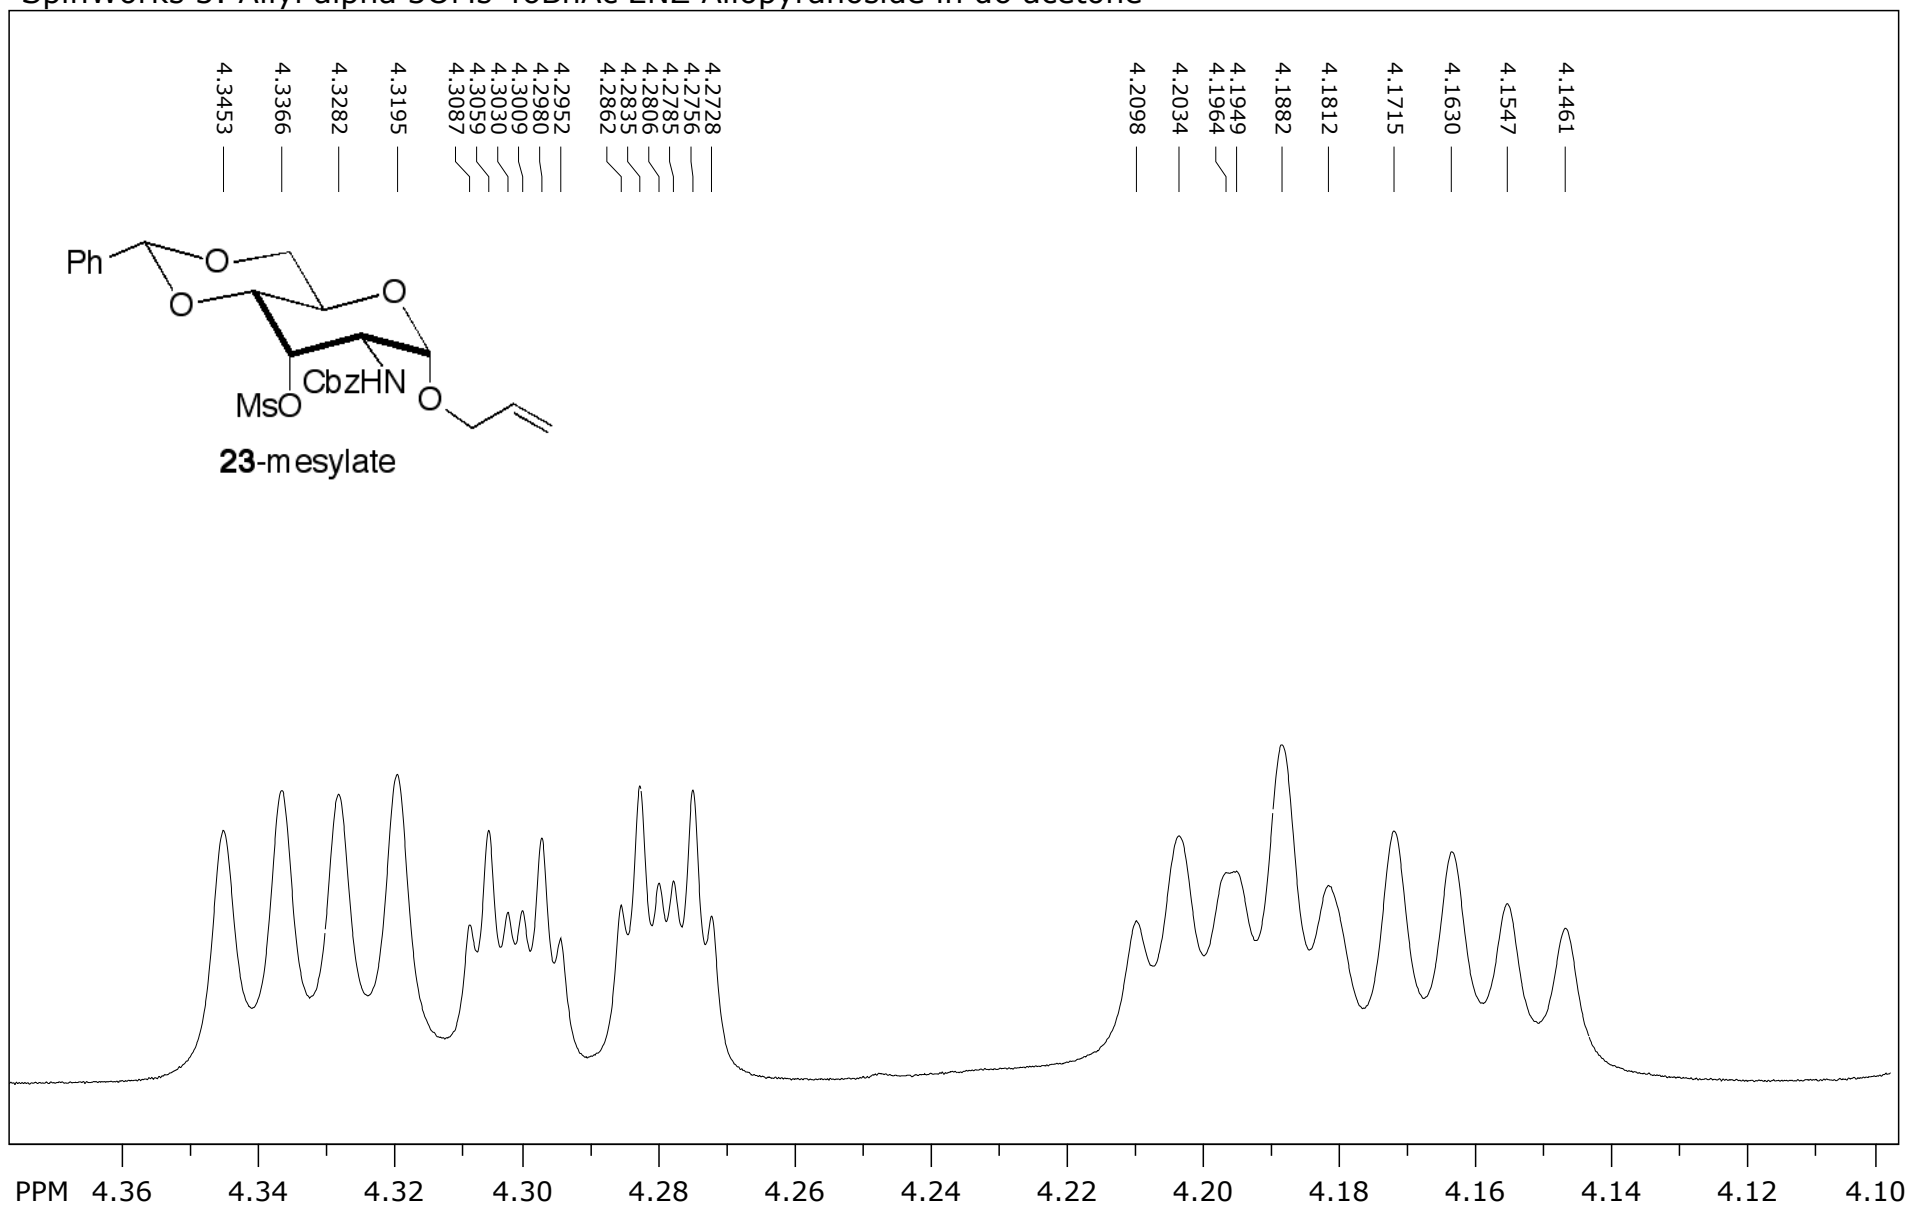

file: ...AllylAlpha3OMsBnAc\_d6acetone\1\fid expt: <zgpr>  
transmitter freq.: 600.553538 MHz  
time domain size: 65536 points  
width: 7211.54 Hz = 12.0082 ppm = 0.110039 Hz/pt  
number of scans: 32

freq. of 0 ppm: 600.550010 MHz  
processed size: 262144 complex points  
LB: 0.000 GF: 0.0000  
Hz/cm: 6.712 ppm/cm: 0.01118

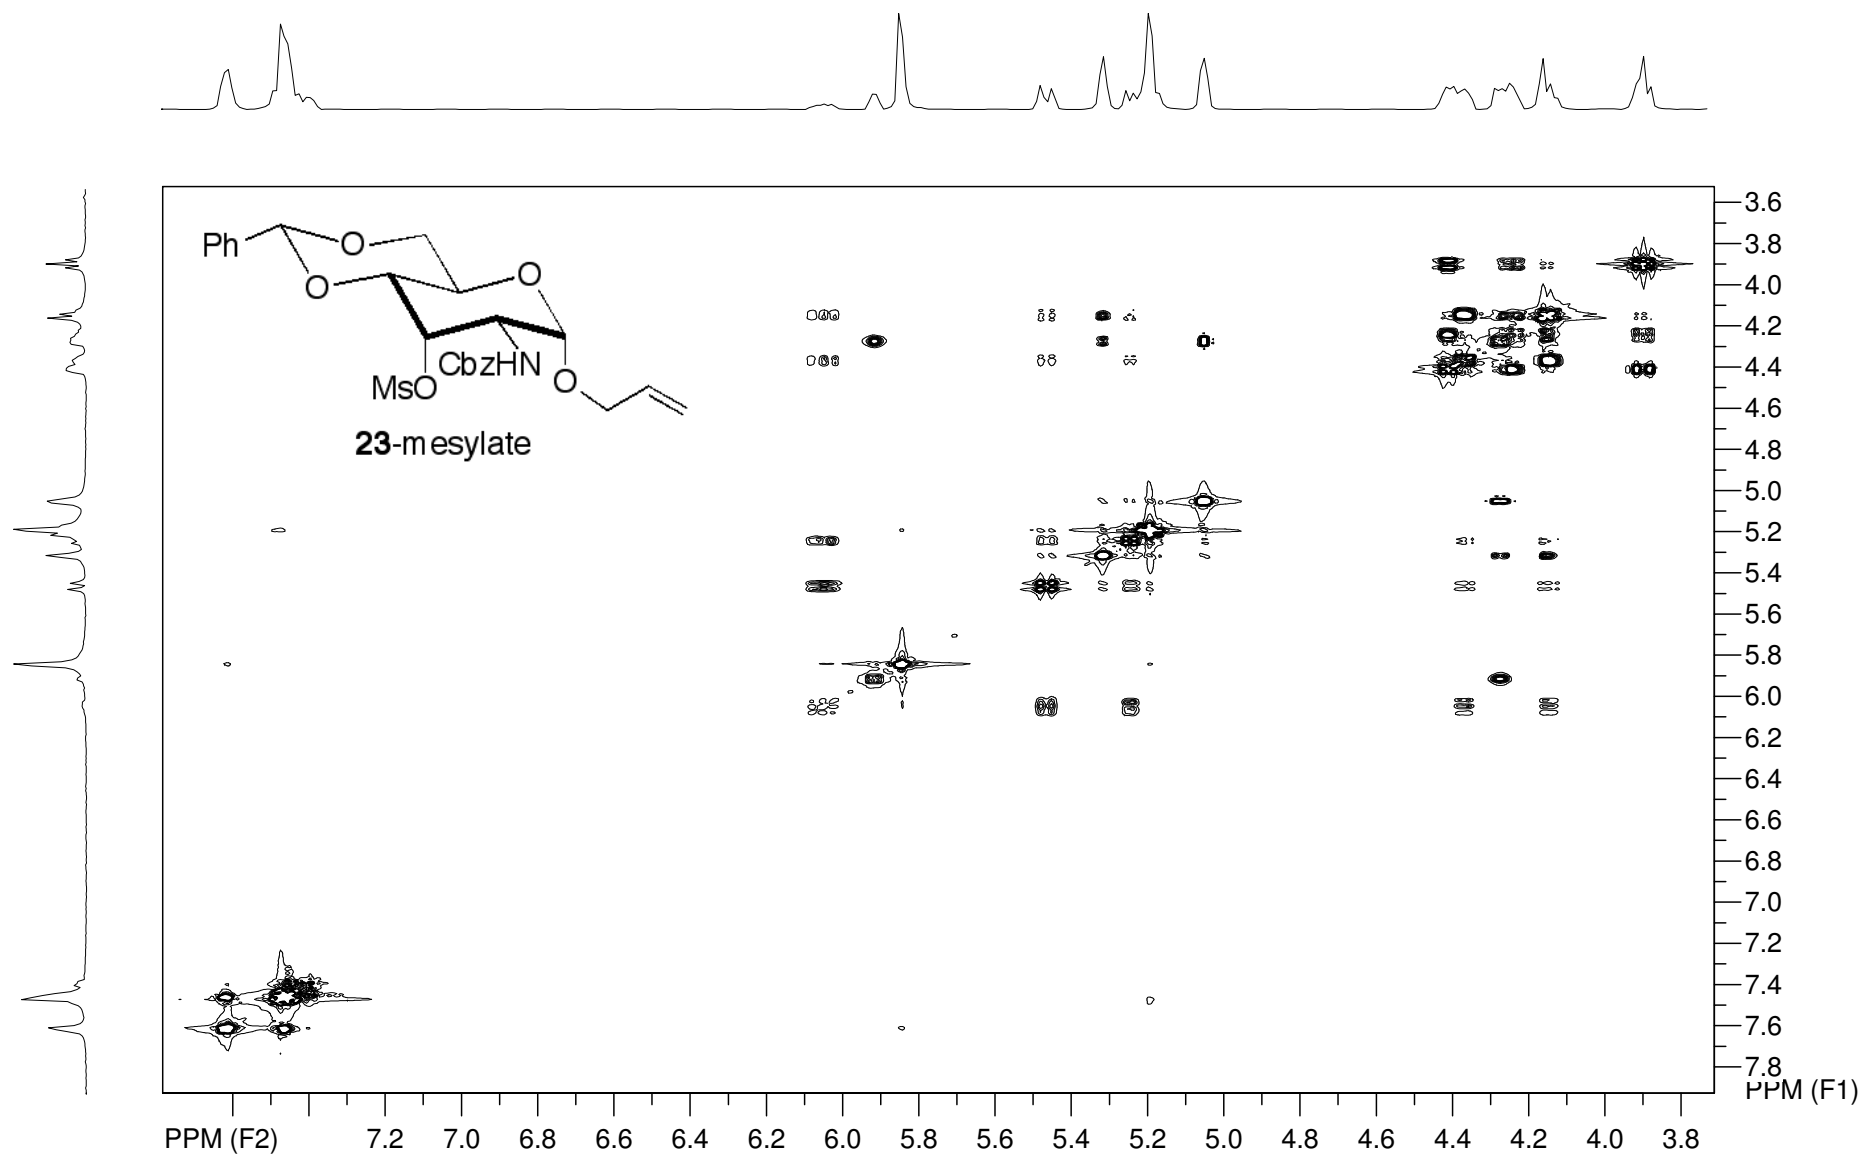

file: C:\Users\Jeff\Documents\NMR Folder\NMR Data\remaining to process\Allyl\Alpha3OMsBnAc\_Ace\F2:\freq. of 0 ppm: 600.549962 MHz  
 transmitter freq.: 600.552832 MHz  
 time domain size: 2048 by 2048 points  
 width (F2): 6009.59 Hz = 10.006806 ppm = 2.934368 Hz/pt  
 number of scans: 2

processed size: 1024 complex points  
 window function: Sine  
 shift: 0.0 degrees  
 Hz/cm: 119.263 ppm/cm: 0.19859

F1: freq. of 0 ppm: 600.549962 MHz  
 processed size: 1024 complex points  
 window function: Sine  
 shift: 0.0 degrees  
 Hz/cm: 220.458 ppm/cm: 0.36709

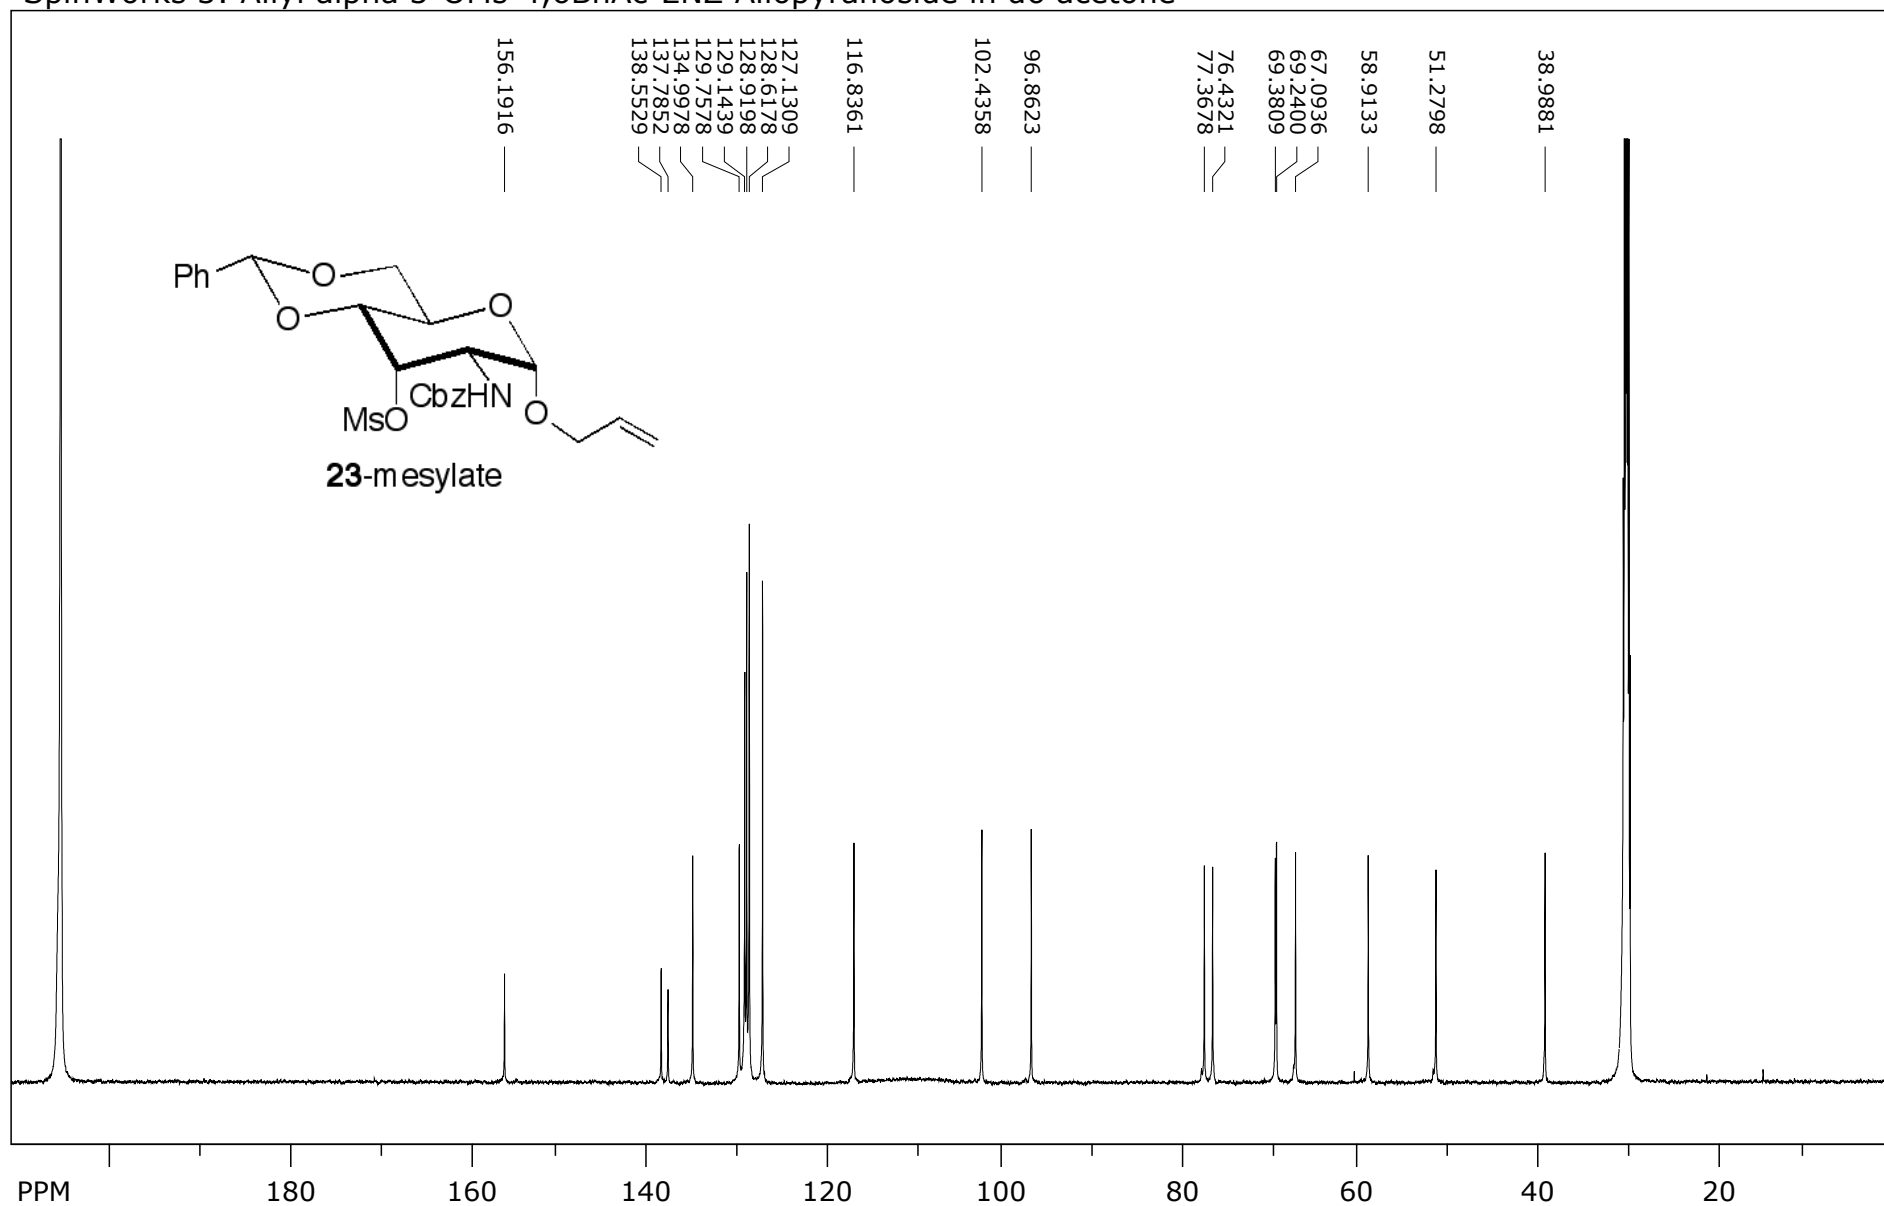

file: ...allylAlpha3OMsBnAc\_d6acet13C\1\fid expt: <zgpg30>  
transmitter freq.: 151.023519 MHz  
time domain size: 65536 points  
width: 36057.69 Hz = 238.7555 ppm = 0.550197 Hz/pt  
number of scans: 28672

freq. of 0 ppm: 151.008298 MHz  
processed size: 32768 complex points  
LB: 5.000 GF: 0.0000  
Hz/cm: 1280.531 ppm/cm: 8.47902



|               |                      |             |                      |                 |              |                        |                     |
|---------------|----------------------|-------------|----------------------|-----------------|--------------|------------------------|---------------------|
| Sample Name   | Jeff-15              | Position    | Vial 14              | Instrument Name | Instrument 1 | User Name              | DYL                 |
| Inj Vol       | 2                    | InjPosition |                      | SampleType      | Unknown      | IRM Calibration Status | Some Ions Missed    |
| Data Filename | C18_Elution2_S15_Jef | ACQ Method  | C18 waters symmetry2 | Comment         |              | Acquired Time          | 9/15/2012 5:39:14 / |

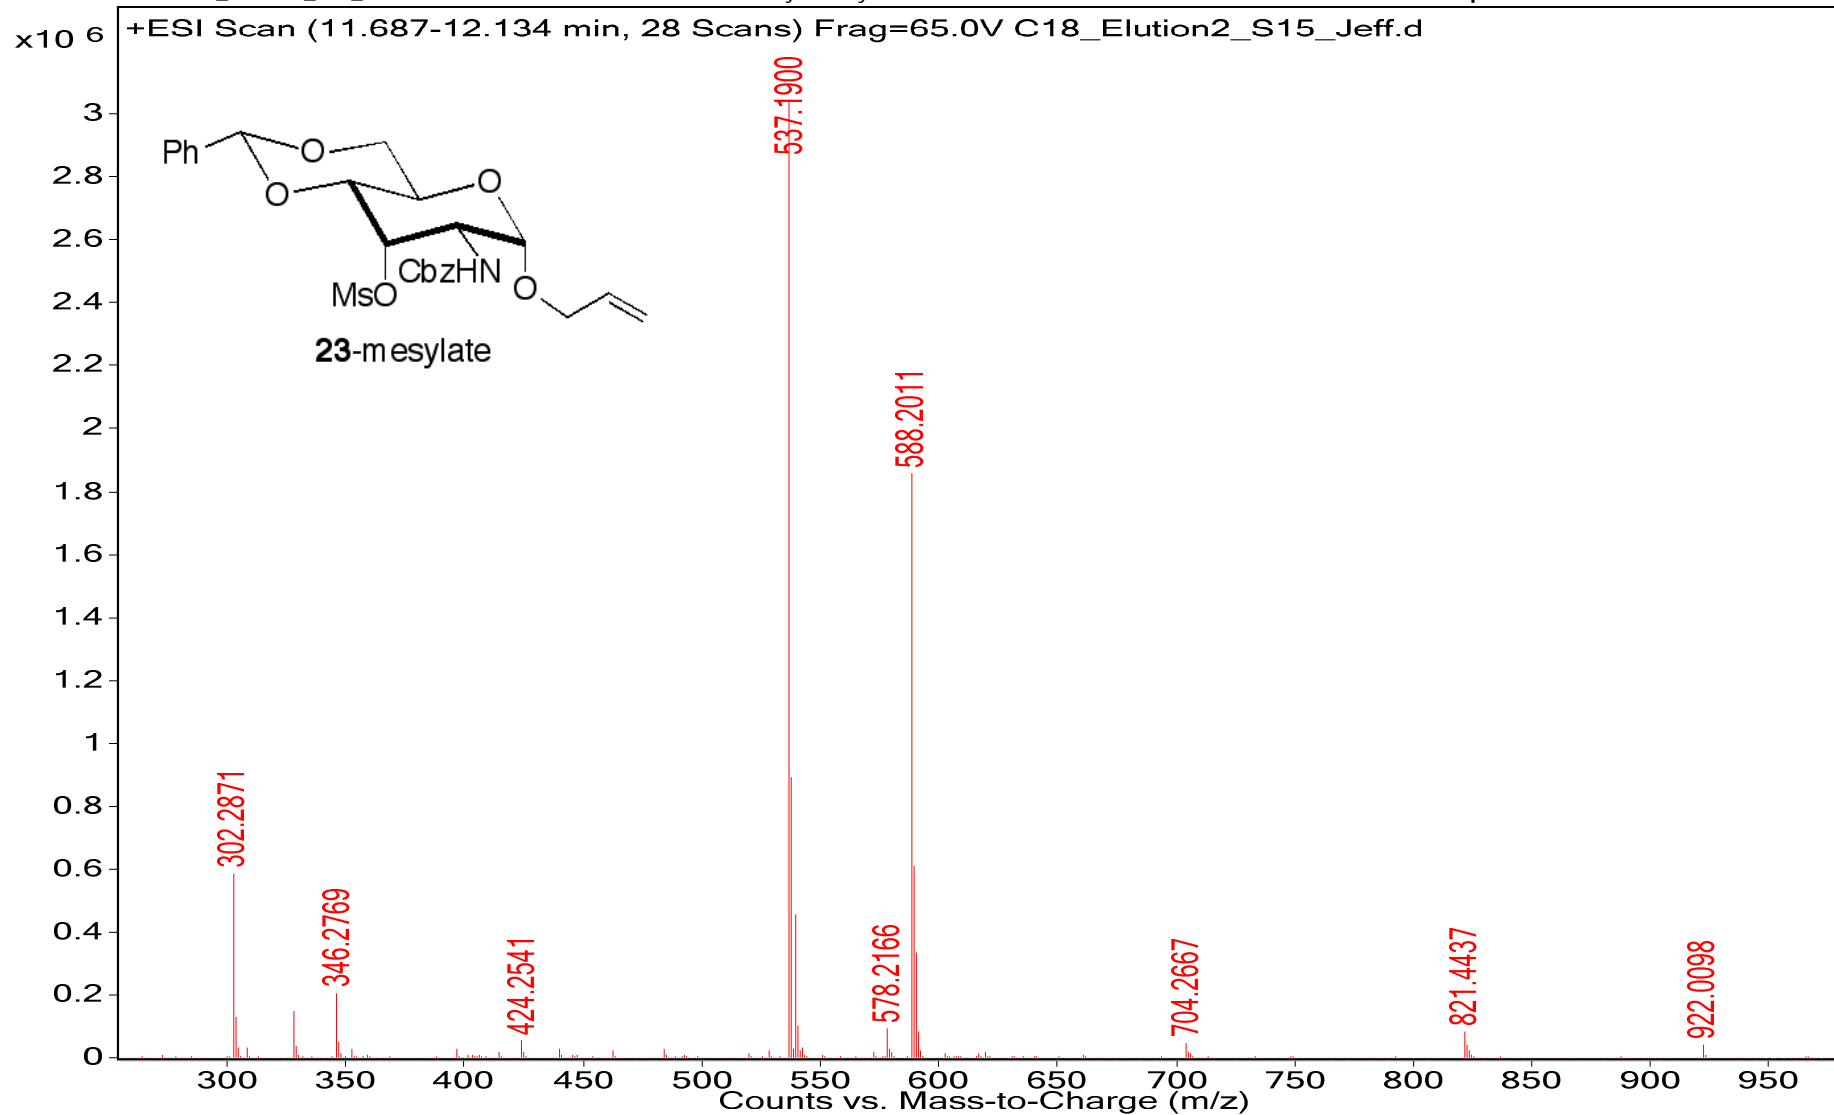

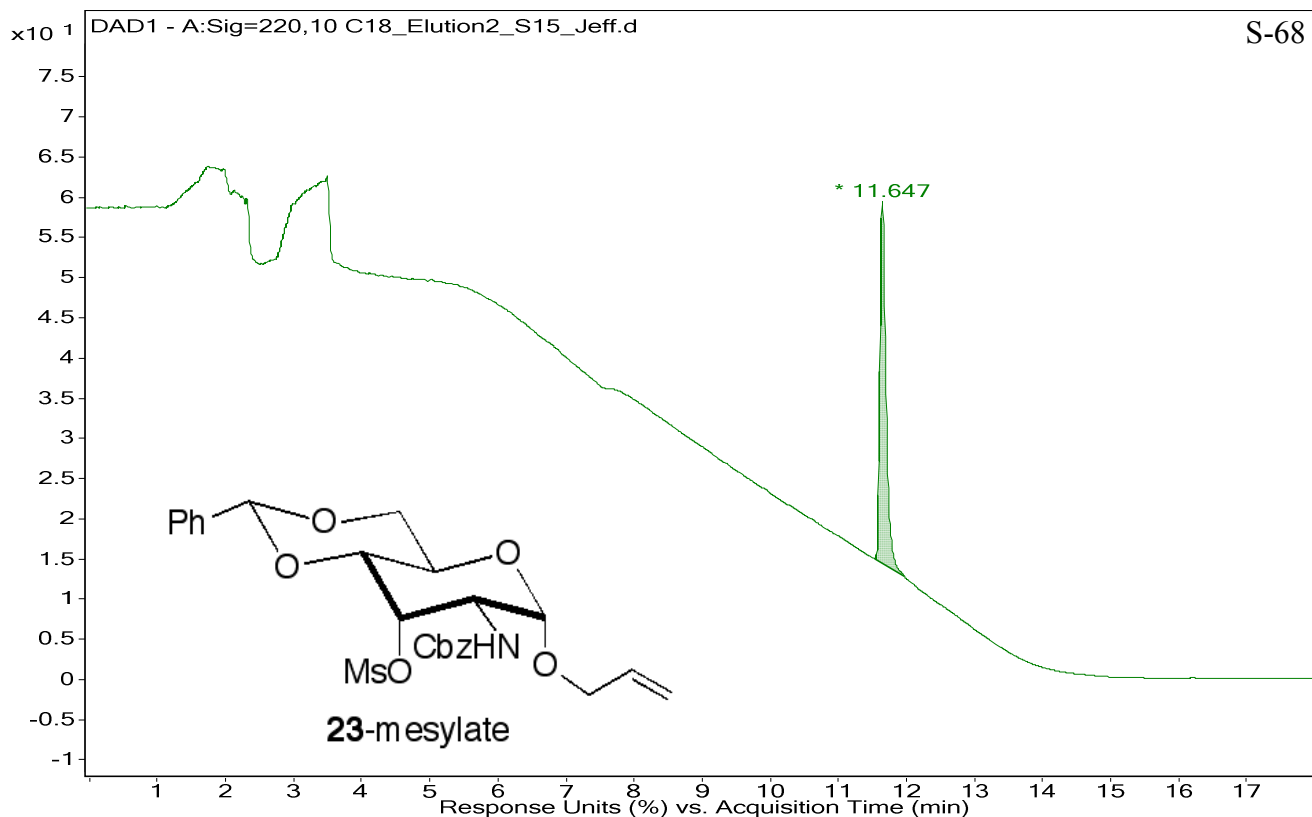

|               |                      |             |                      |                 |              |                        |                      |
|---------------|----------------------|-------------|----------------------|-----------------|--------------|------------------------|----------------------|
| Sample Name   | Jeff-15              | Position    | Vial 14              | Instrument Name | Instrument 1 | User Name              | DYL                  |
| Inj Vol       | 2                    | InjPosition |                      | SampleType      | Unknown      | IRM Calibration Status | Some Ions Missed     |
| Data Filename | C18_Elution2_S15_Jef | ACQ Method  | C18 waters symmetry2 | Comment         |              | Acquired Time          | 9/15/2012 5:39:14 AM |

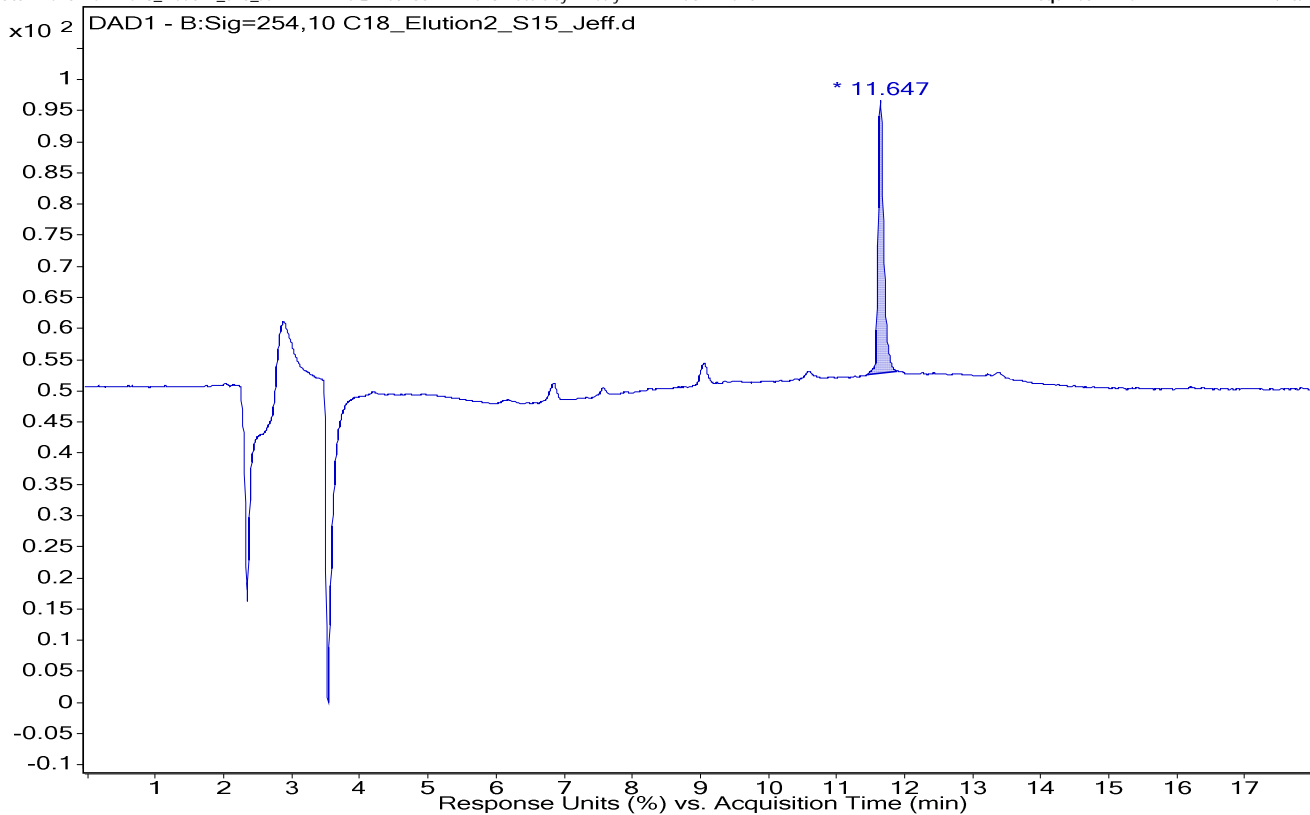

Analysis on a Waters SymmetryShield™ C18 (4.6 mm X 15 cm (i.d. x l.), 3.5 μm) at 0.5 mL/min. Solvent A: 50 mM NH<sub>4</sub>OAc (aq); B: CH<sub>3</sub>CN

| Time (min) | % B |
|------------|-----|
| 0          | 20  |
| 1          | 20  |
| 10         | 100 |
| 20         | 100 |

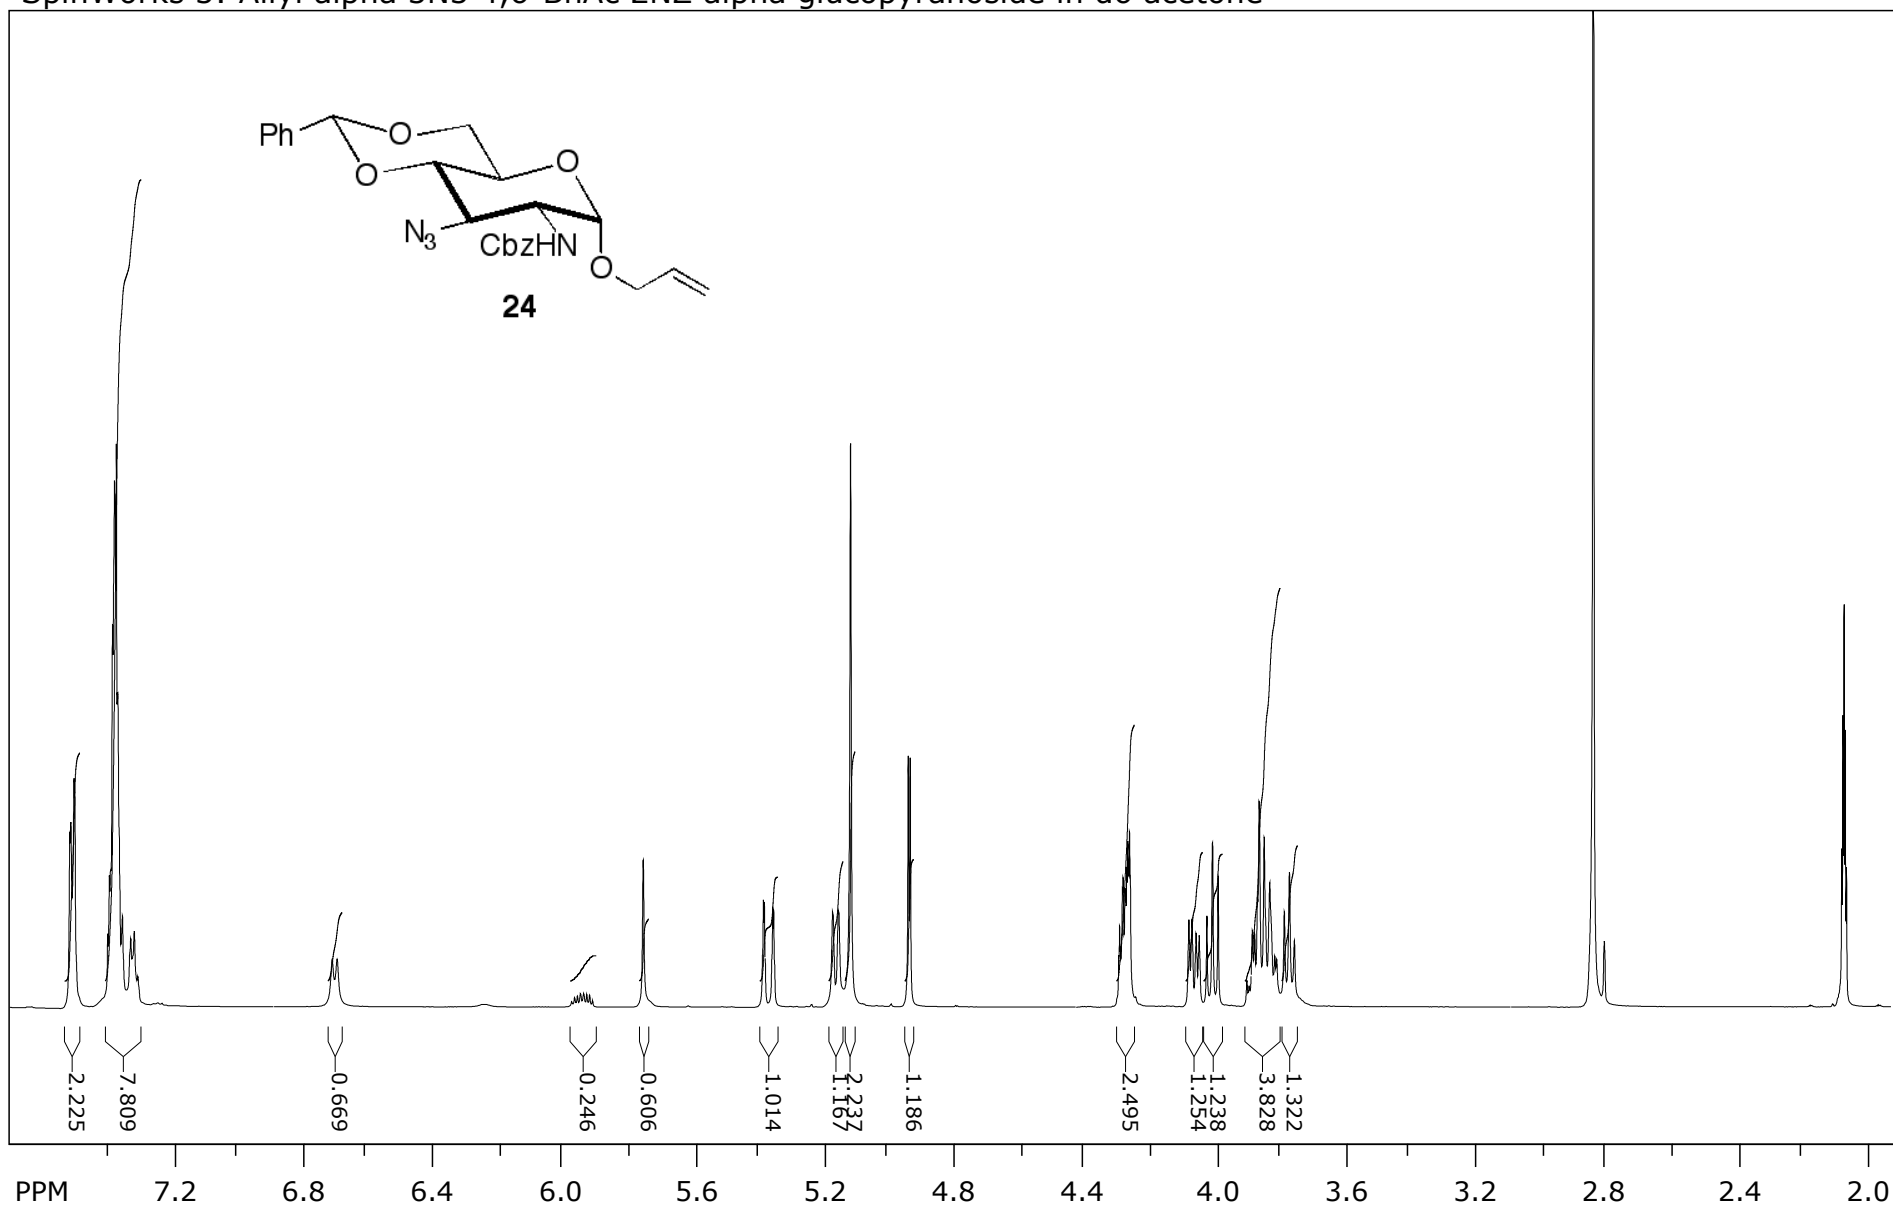

file: ...pha3N3GluBnAc2NZ1OAllyl\_acet\1\fid expt: <zgpr>  
transmitter freq.: 600.553538 MHz  
time domain size: 65536 points  
width: 7211.54 Hz = 12.0082 ppm = 0.110039 Hz/pt  
number of scans: 32

freq. of 0 ppm: 600.550010 MHz  
processed size: 262144 complex points  
LB: 0.500 GF: 0.0000  
Hz/cm: 139.241 ppm/cm: 0.23185

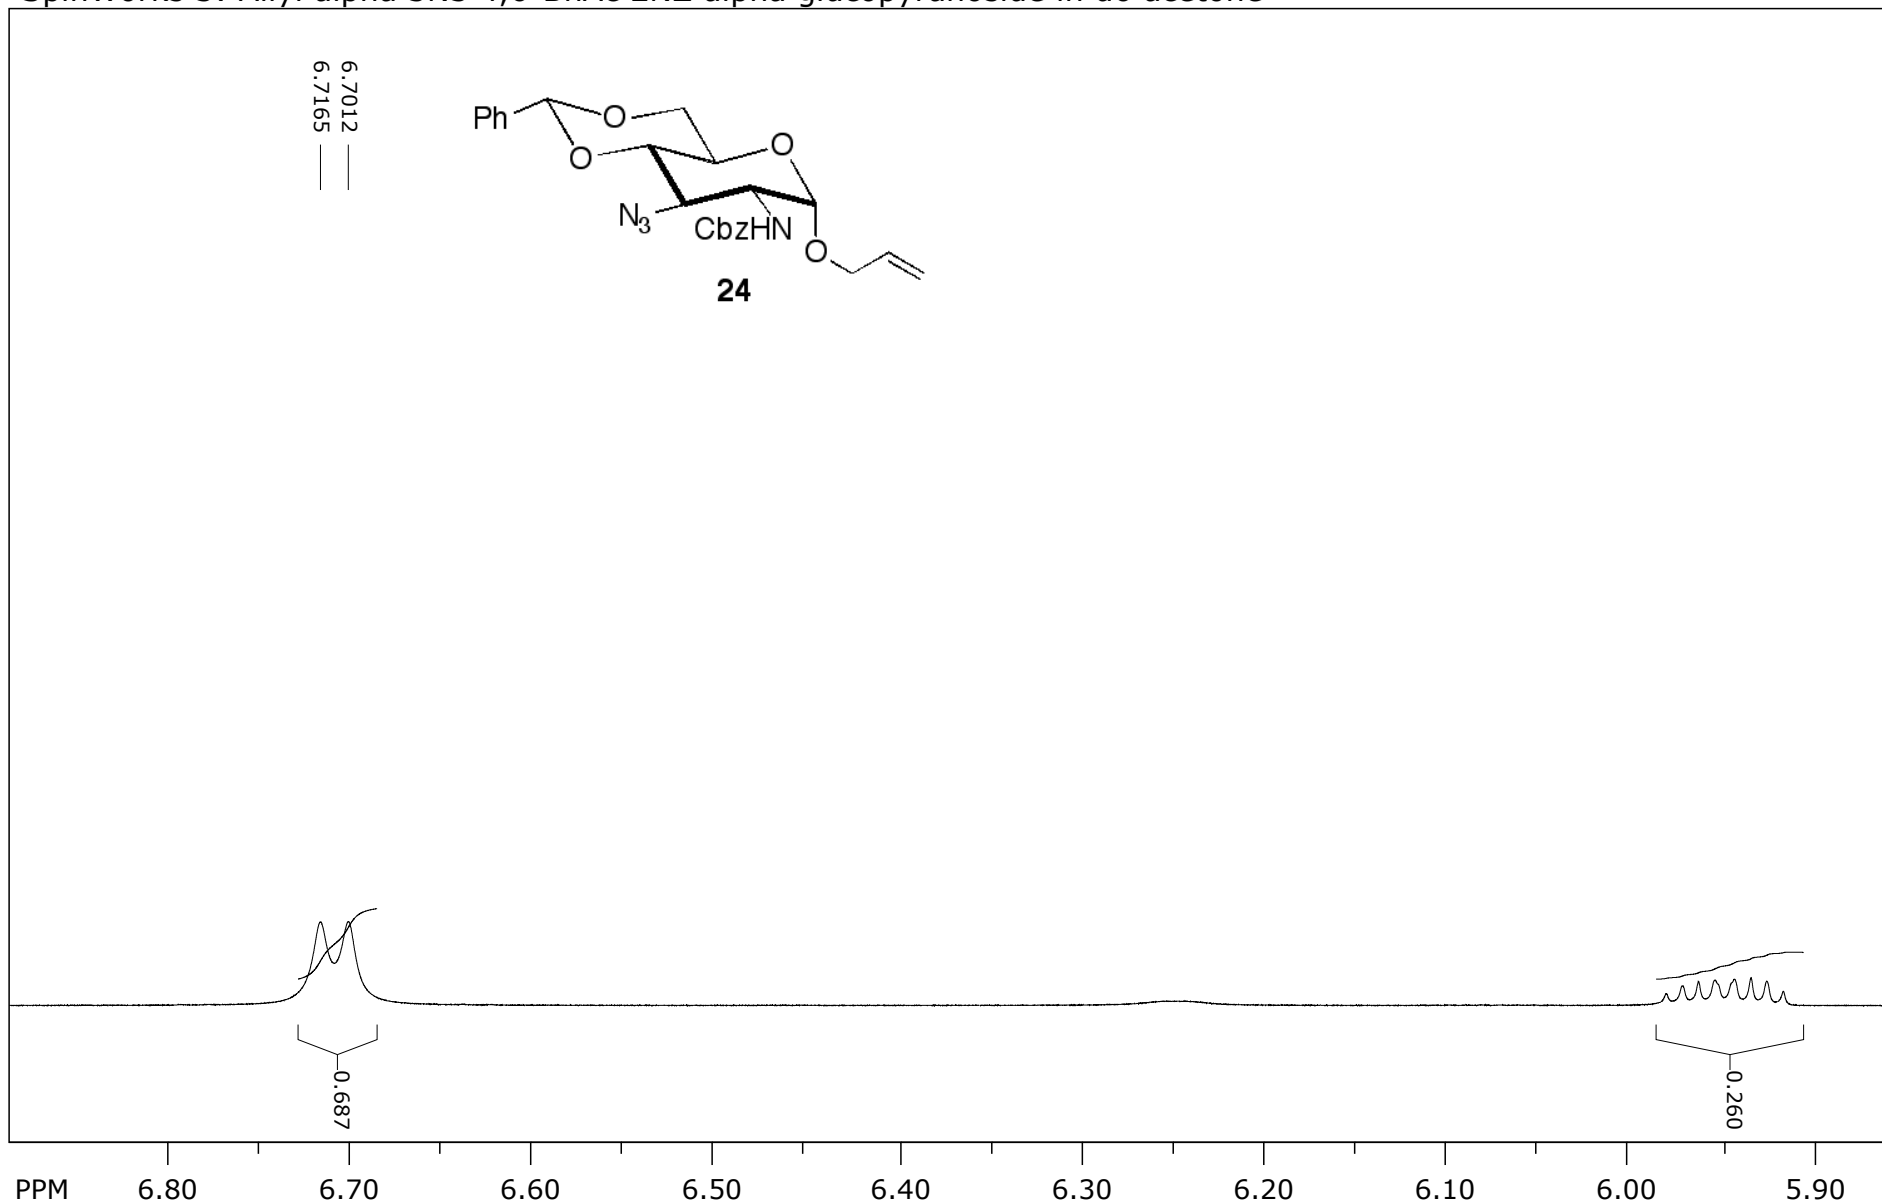

file: ...pha3N3GluBnAc2NZ1OAllyl\_acet\1\fid expt: <zgpr>  
transmitter freq.: 600.553538 MHz  
time domain size: 65536 points  
width: 7211.54 Hz = 12.0082 ppm = 0.110039 Hz/pt  
number of scans: 32

freq. of 0 ppm: 600.550010 MHz  
processed size: 262144 complex points  
LB: 0.500 GF: 0.0000  
Hz/cm: 24.790 ppm/cm: 0.04128

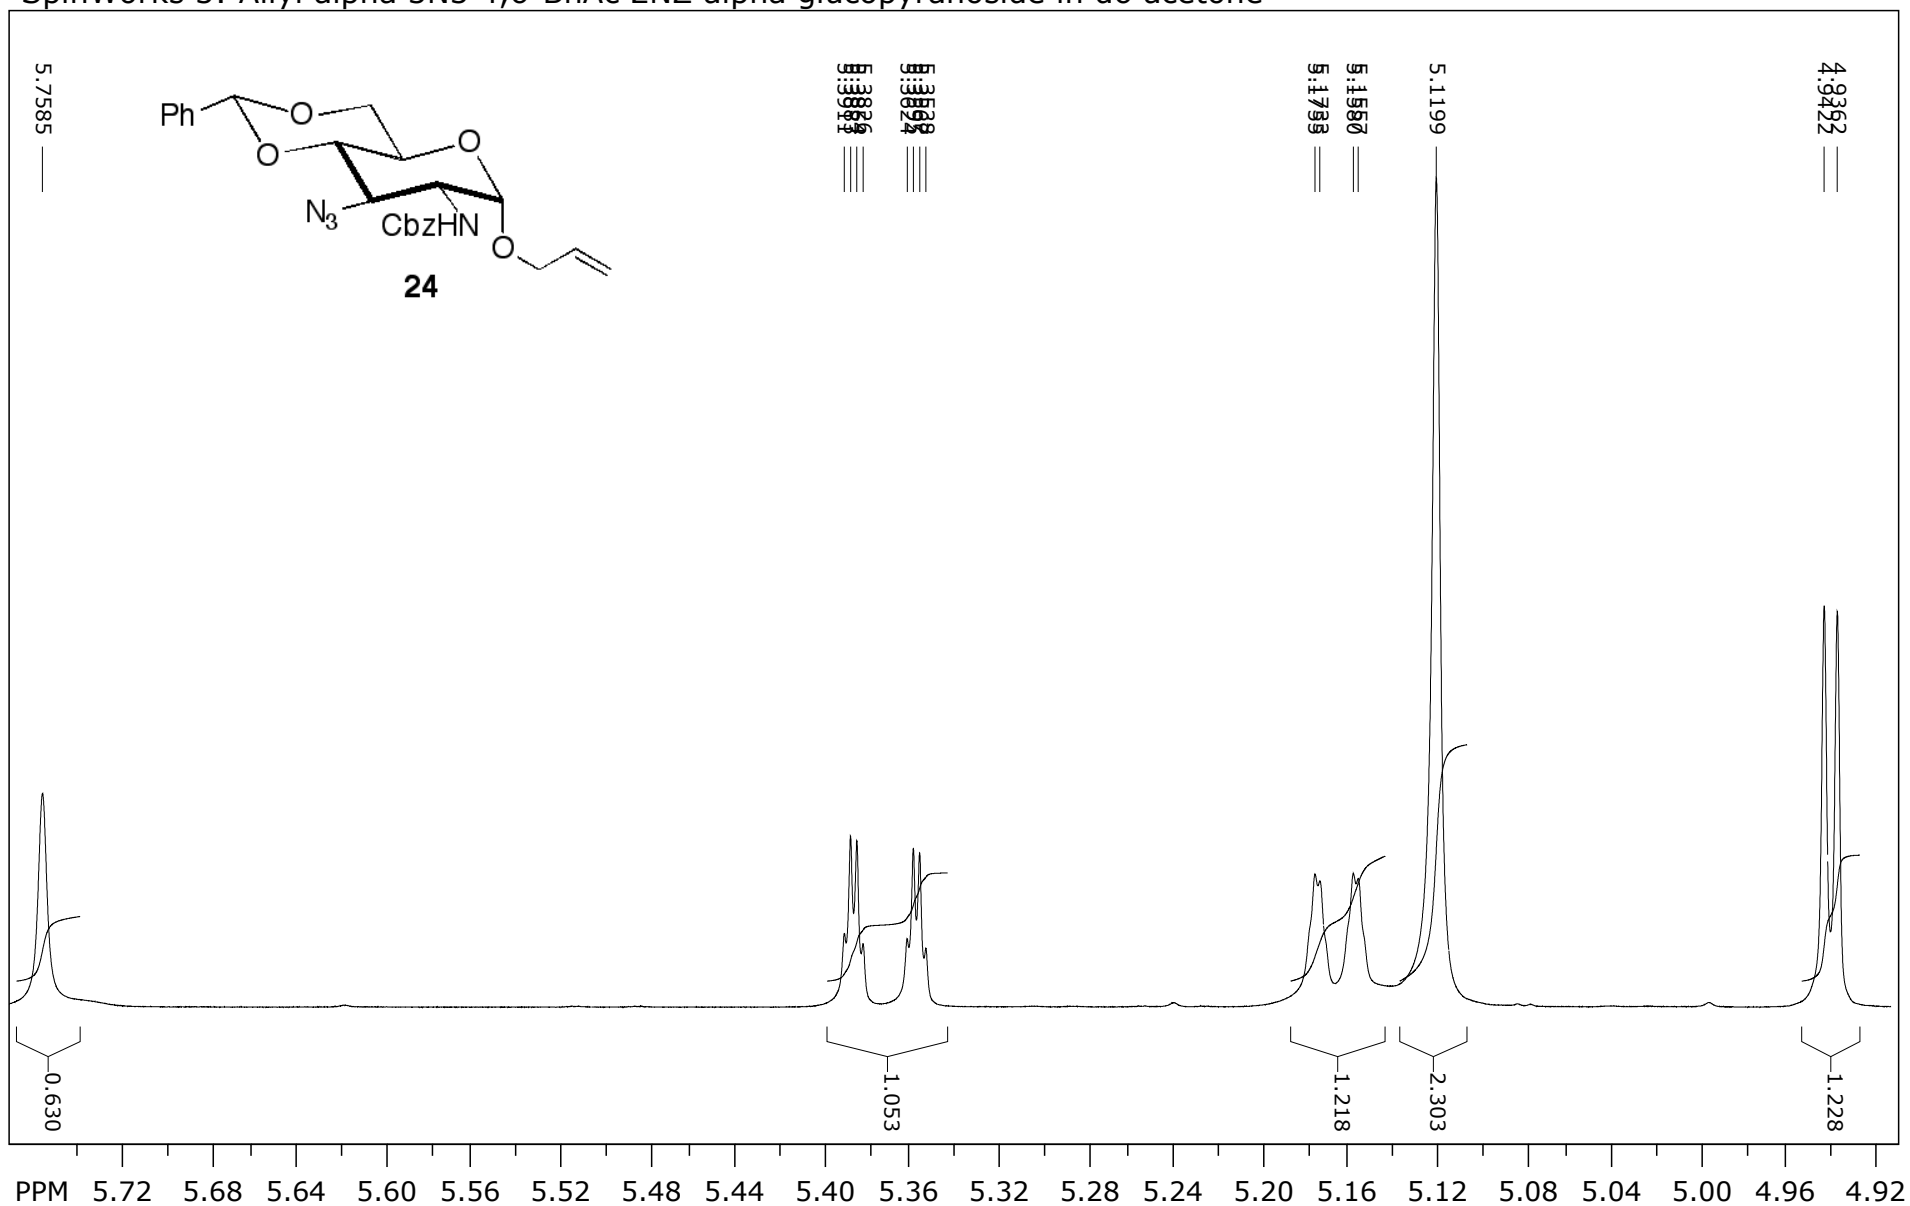

file: ...pha3N3GluBnAc2NZ1OAllyl\_acet\1\fid expt: <zgr>  
transmitter freq.: 600.553538 MHz  
time domain size: 65536 points  
width: 7211.54 Hz = 12.0082 ppm = 0.110039 Hz/pt  
number of scans: 32

freq. of 0 ppm: 600.550010 MHz  
processed size: 262144 complex points  
LB: 0.500 GF: 0.0000  
Hz/cm: 20.713 ppm/cm: 0.03449

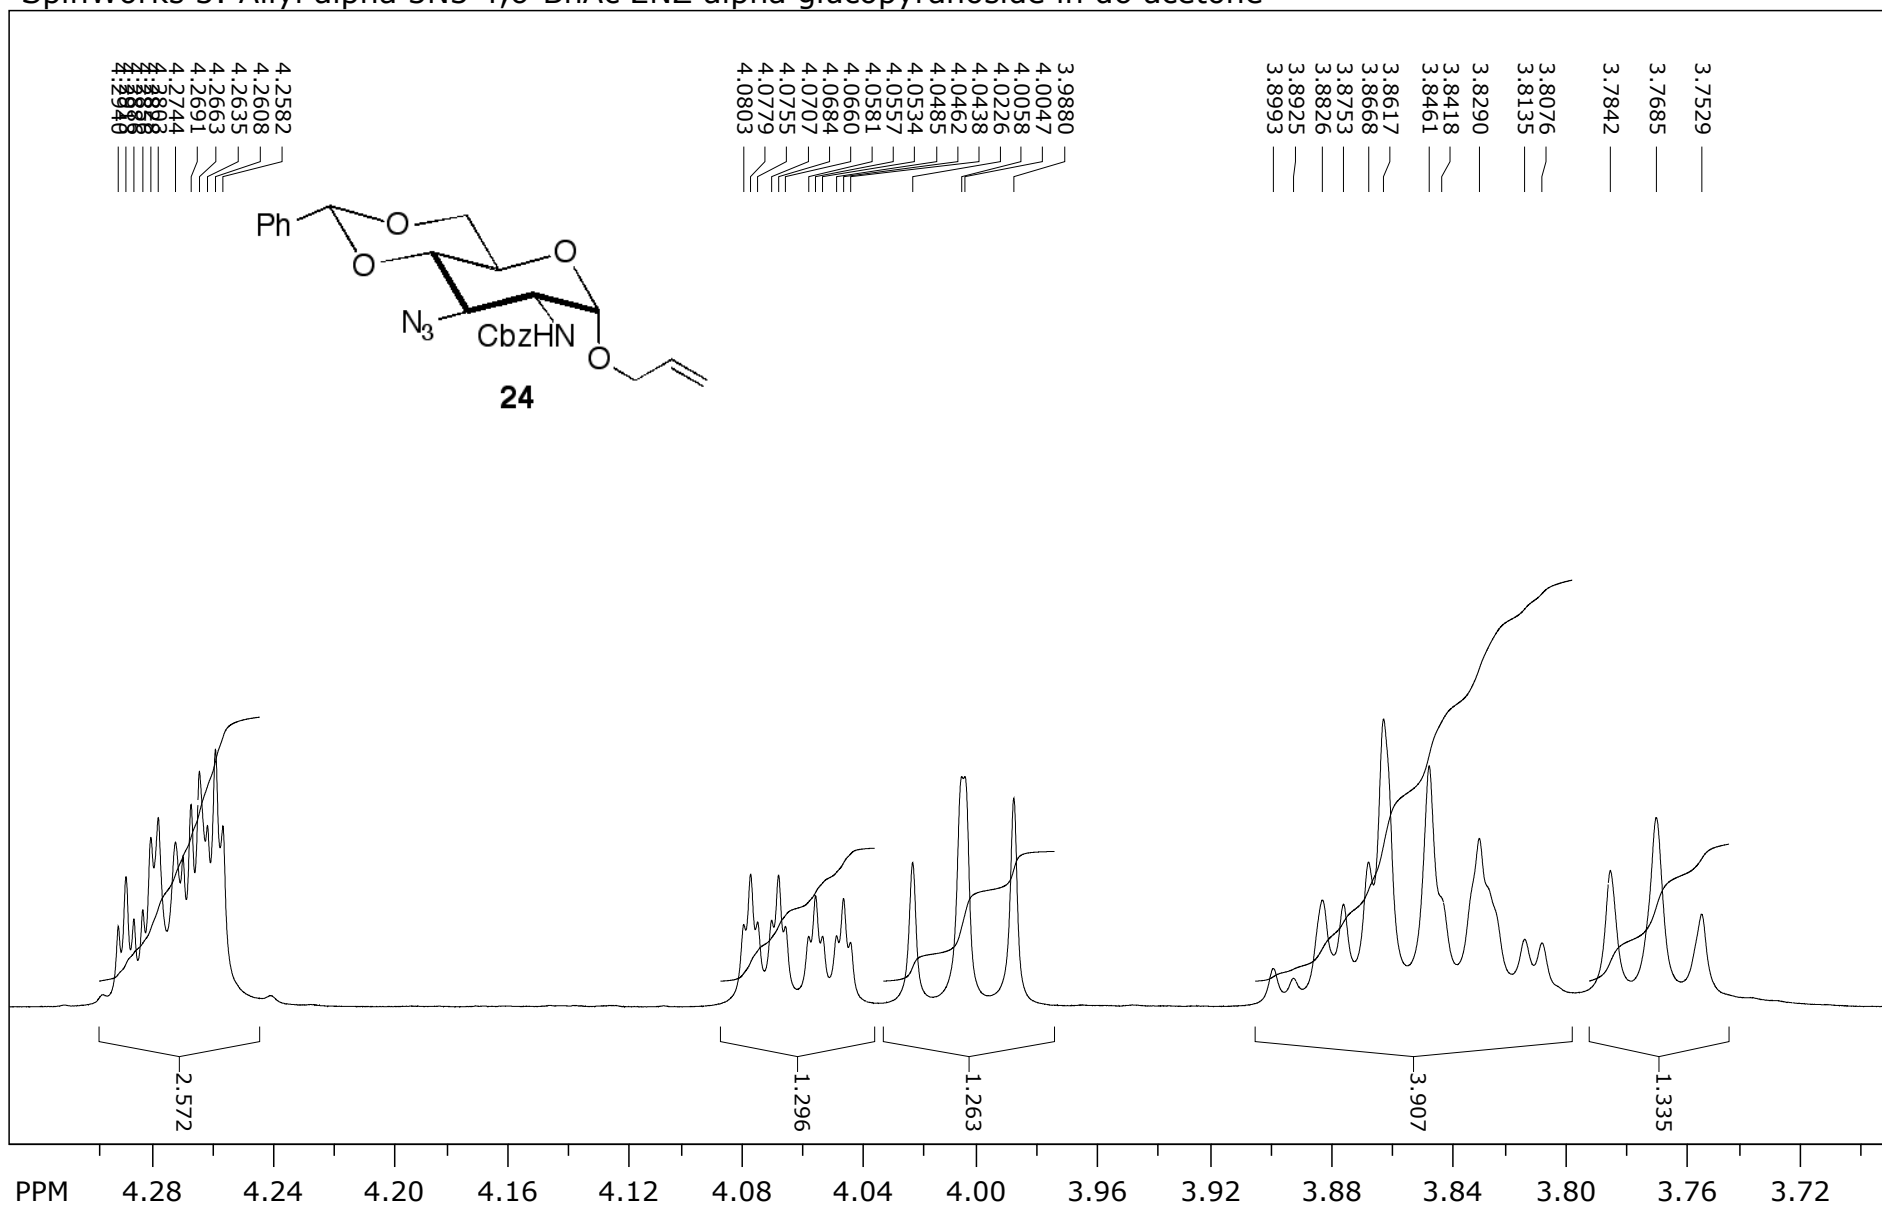

file: ...pha3N3GluBnAc2NZ1OAllyl\_acet\1\fid expt: <zgpr>  
transmitter freq.: 600.553538 MHz  
time domain size: 65536 points  
width: 7211.54 Hz = 12.0082 ppm = 0.110039 Hz/pt  
number of scans: 32

freq. of 0 ppm: 600.550010 MHz  
processed size: 262144 complex points  
LB: 0.500 GF: 0.0000  
Hz/cm: 15.447 ppm/cm: 0.02572

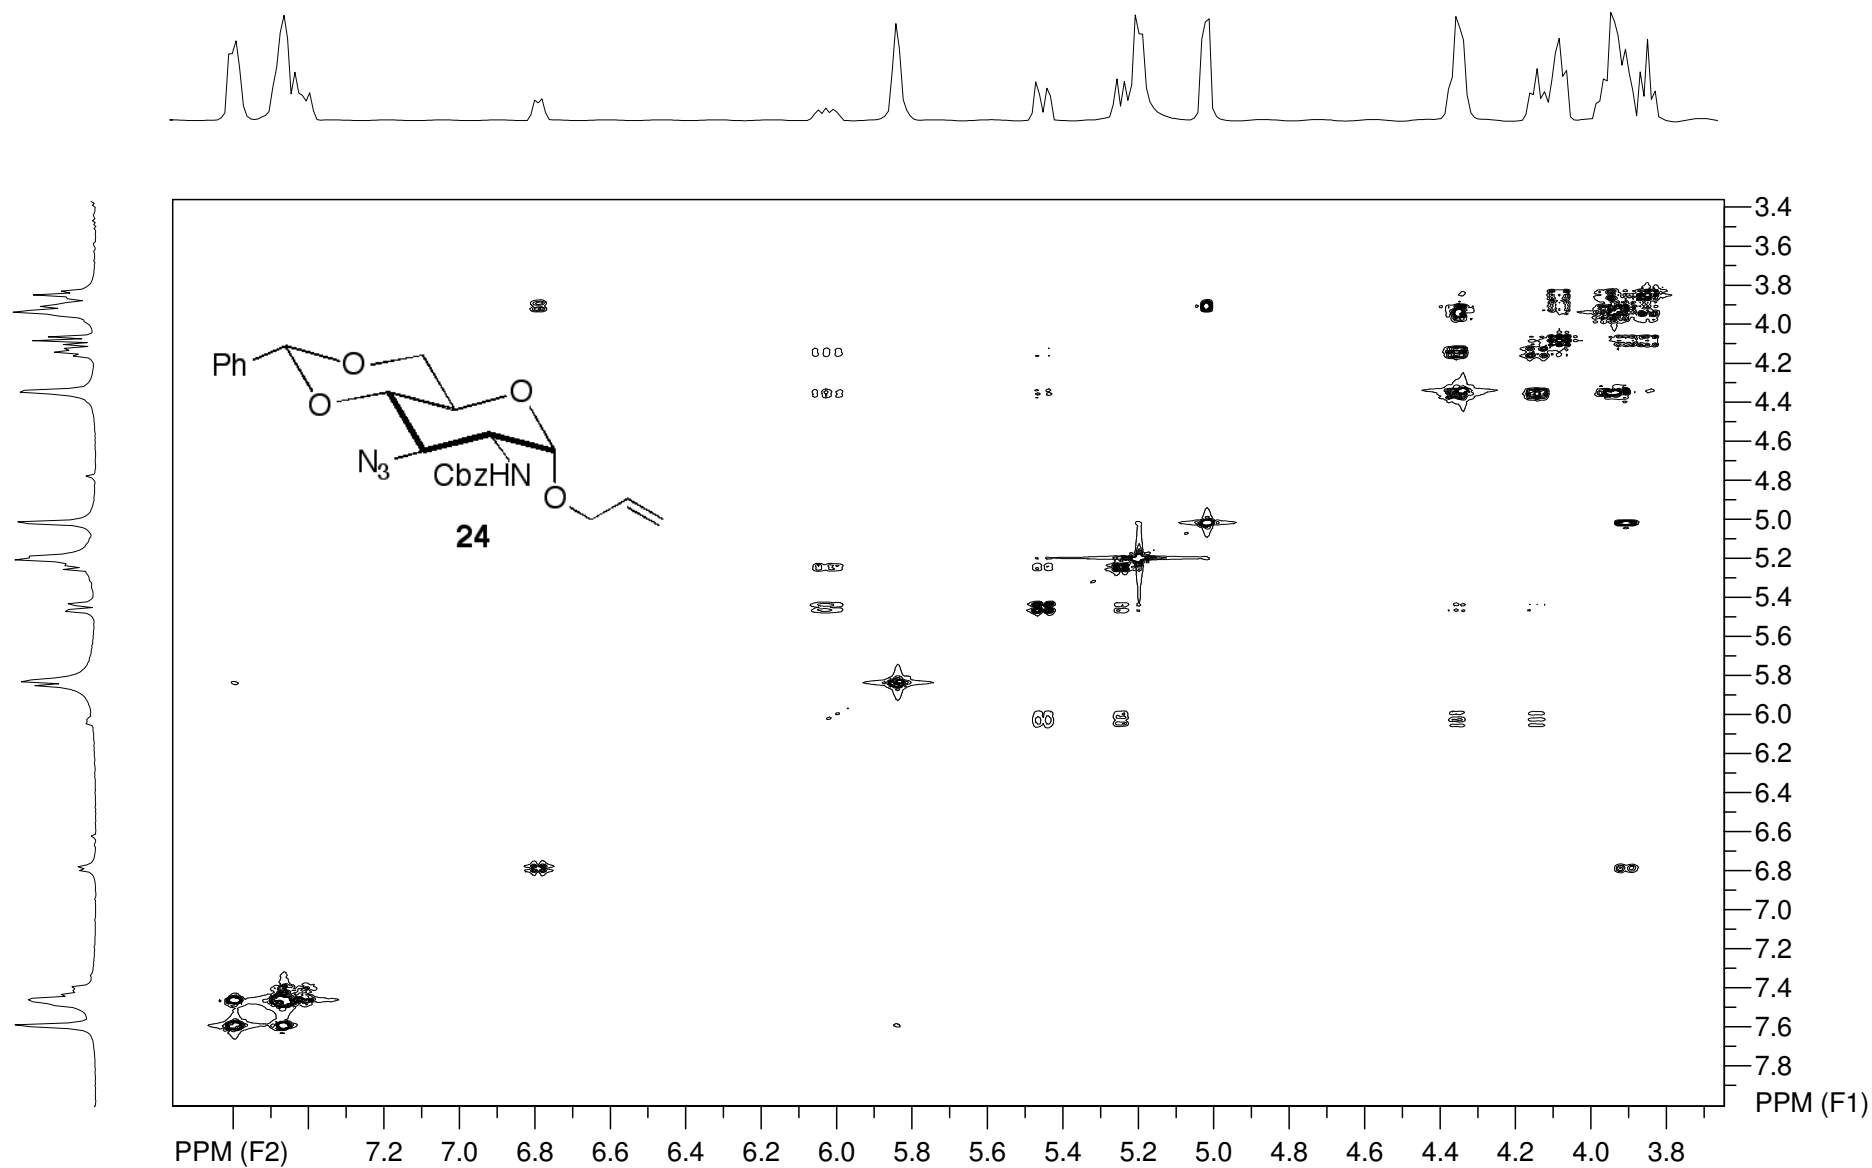

file: C:\Users\Jeff\Documents\NMR Folder\NMR Data\remaining to process\alpha3N3GluBnAc2NZ1OF2:1freq. of 0 ppm: 600.549962 MHz  
transmitter freq.: 600.552832 MHz  
time domain size: 2048 by 2048 points  
width (F2): 6009.59 Hz = 10.006806 ppm = 2.934368 Hz/pt  
number of scans: 2

processed size: 1024 complex points  
window function: Sine  
shift: 0.0 degrees  
Hz/cm: 120.521 ppm/cm: 0.20068

F1: freq. of 0 ppm: 600.549962 MHz  
processed size: 1024 complex points  
window function: Sine  
shift: 0.0 degrees  
Hz/cm: 232.549 ppm/cm: 0.38722

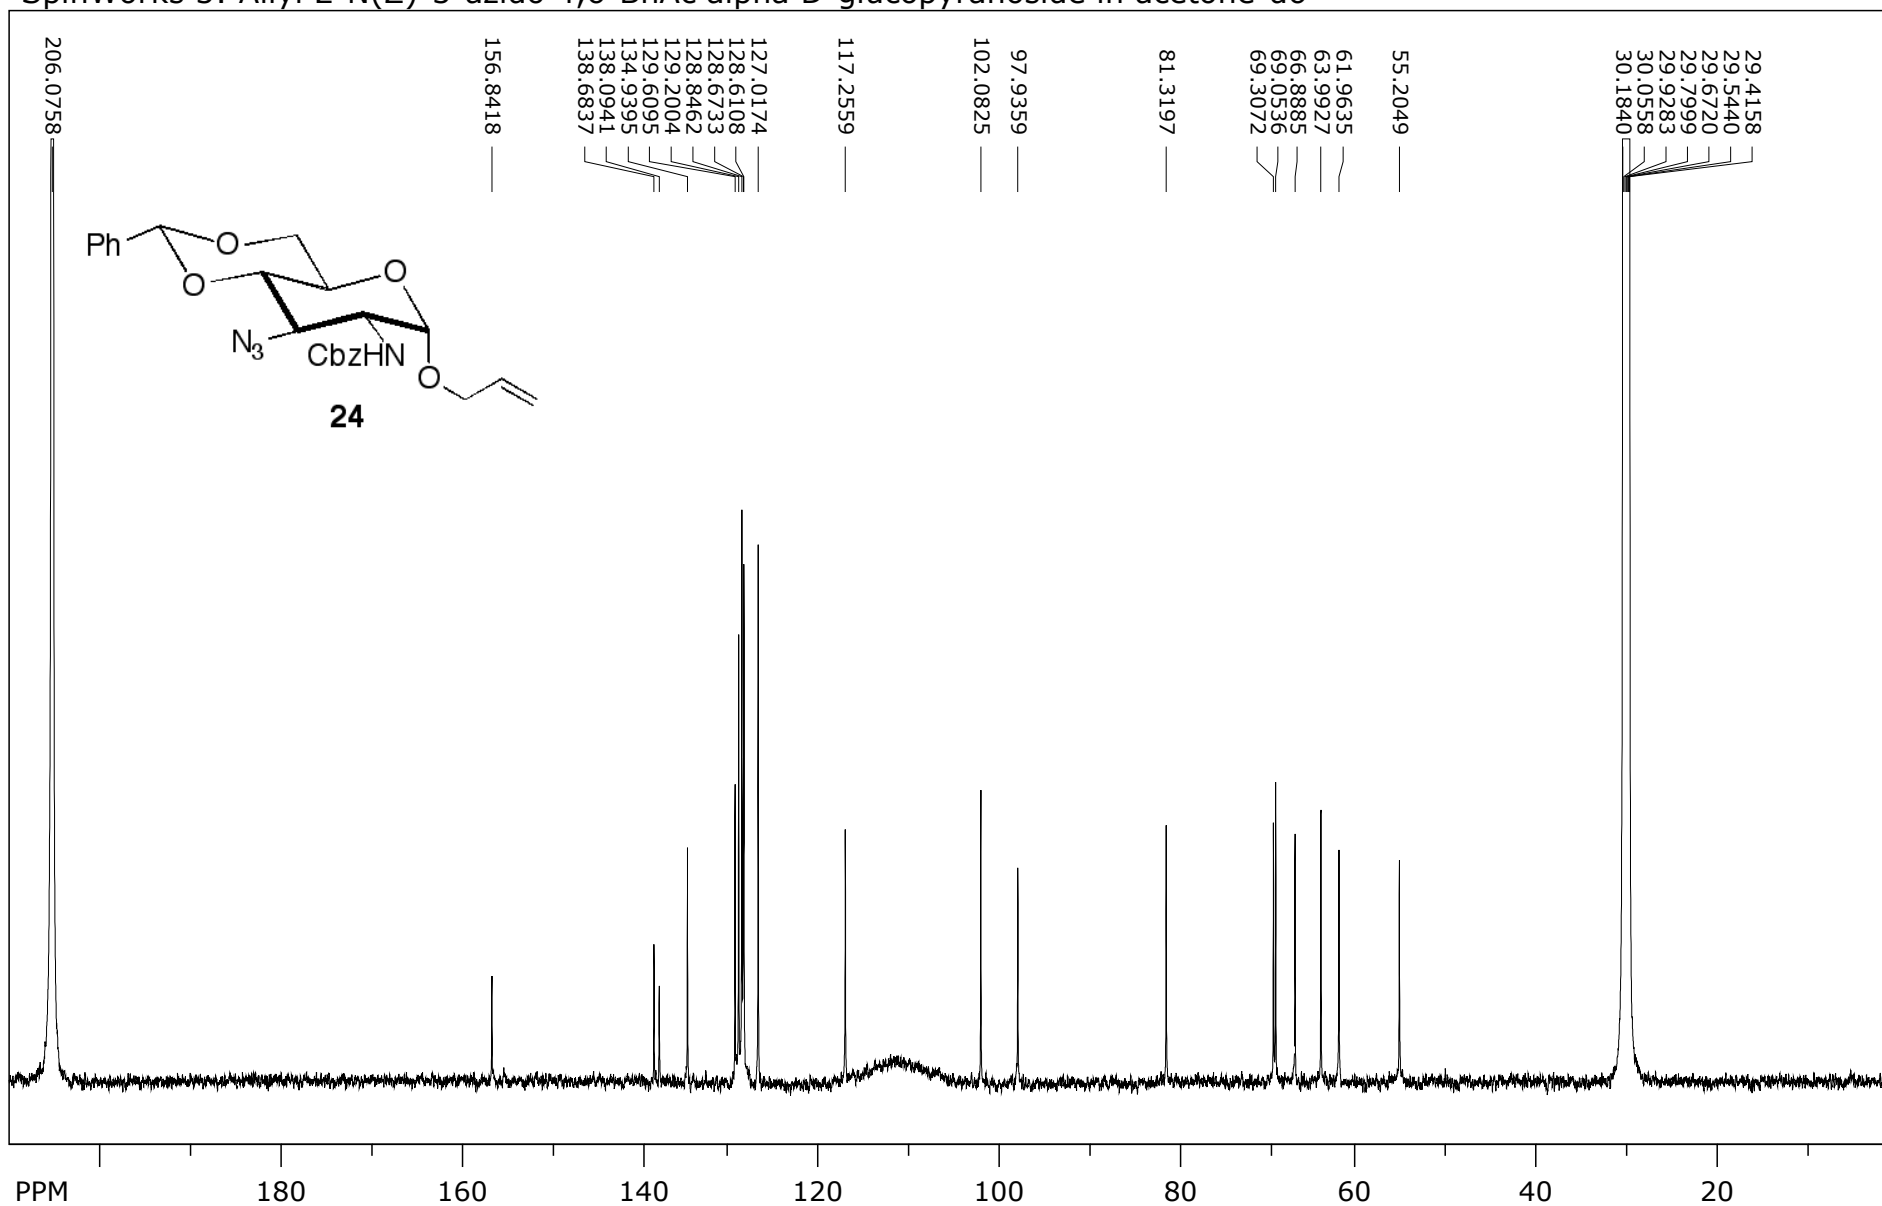

file: ...Allyl\_alpha3N3Glu\_Acetd6\_13C\1\fid expt: <zgpg30>  
transmitter freq.: 151.023519 MHz  
time domain size: 65536 points  
width: 36057.69 Hz = 238.7555 ppm = 0.550197 Hz/pt  
number of scans: 36864

freq. of 0 ppm: 151.008287 MHz  
processed size: 32768 complex points  
LB: 5.000 GF: 0.0000  
Hz/cm: 1273.287 ppm/cm: 8.43105



|               |                      |             |                      |                 |              |                        |                      |
|---------------|----------------------|-------------|----------------------|-----------------|--------------|------------------------|----------------------|
| Sample Name   | Sample16 redo        | Position    | Vial 7               | Instrument Name | Instrument 1 | User Name              | DYL                  |
| Inj Vol       | 3                    | InjPosition |                      | SampleType      | Unknown      | IRM Calibration Status | Some Ions Missed     |
| Data Filename | C18_Samp16Redo_Jeff. | ACQ Method  | C18 waters symmetry2 | Comment         |              | Acquired Time          | 9/20/2012 6:06:54 AM |

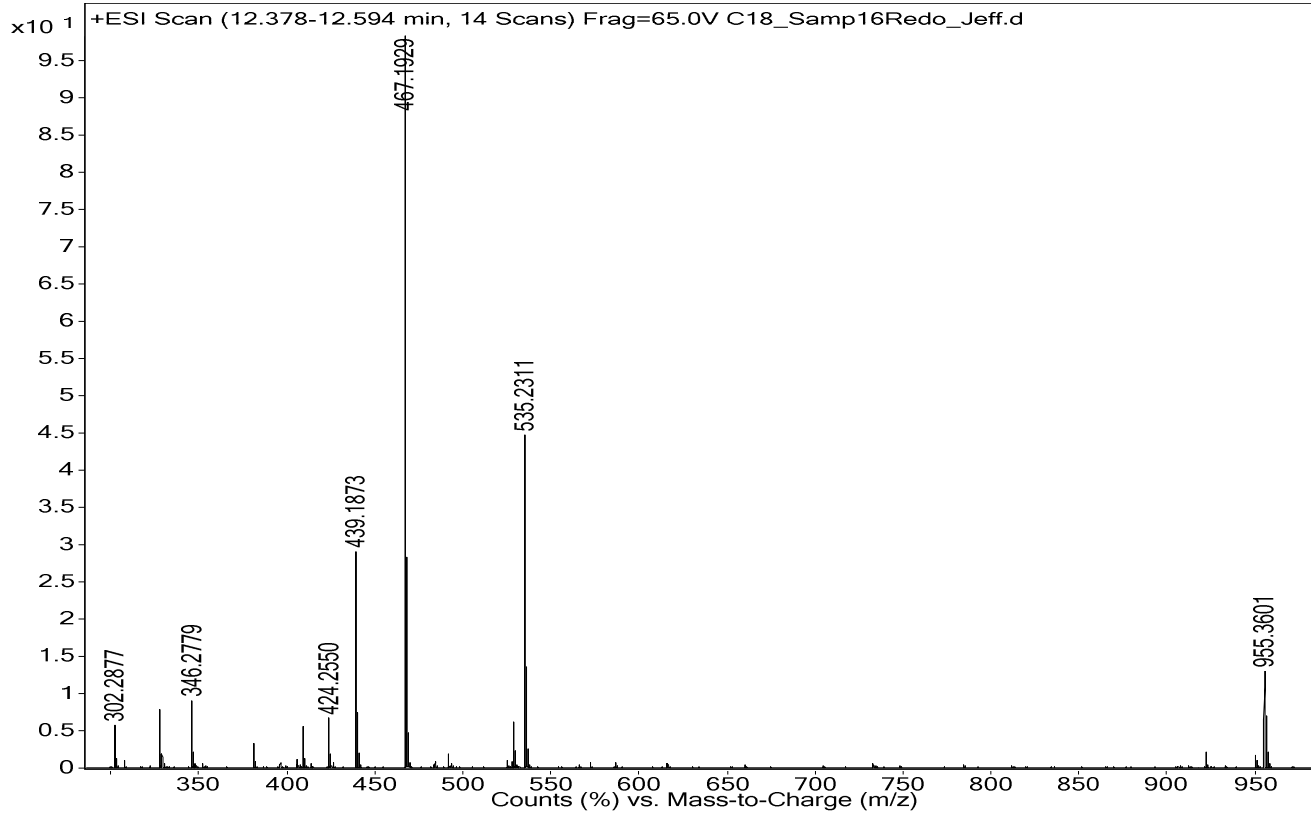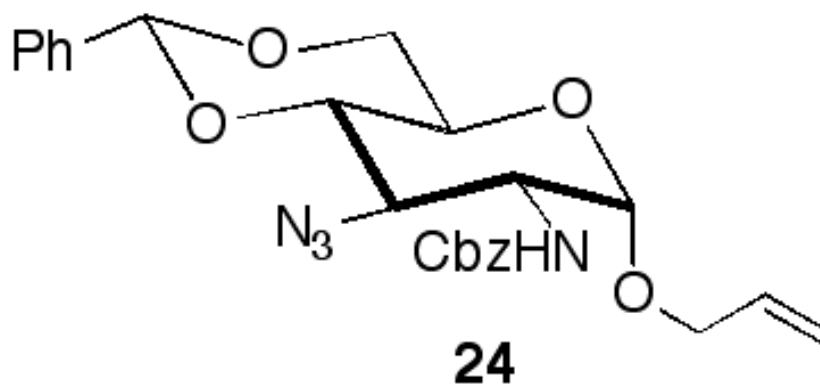

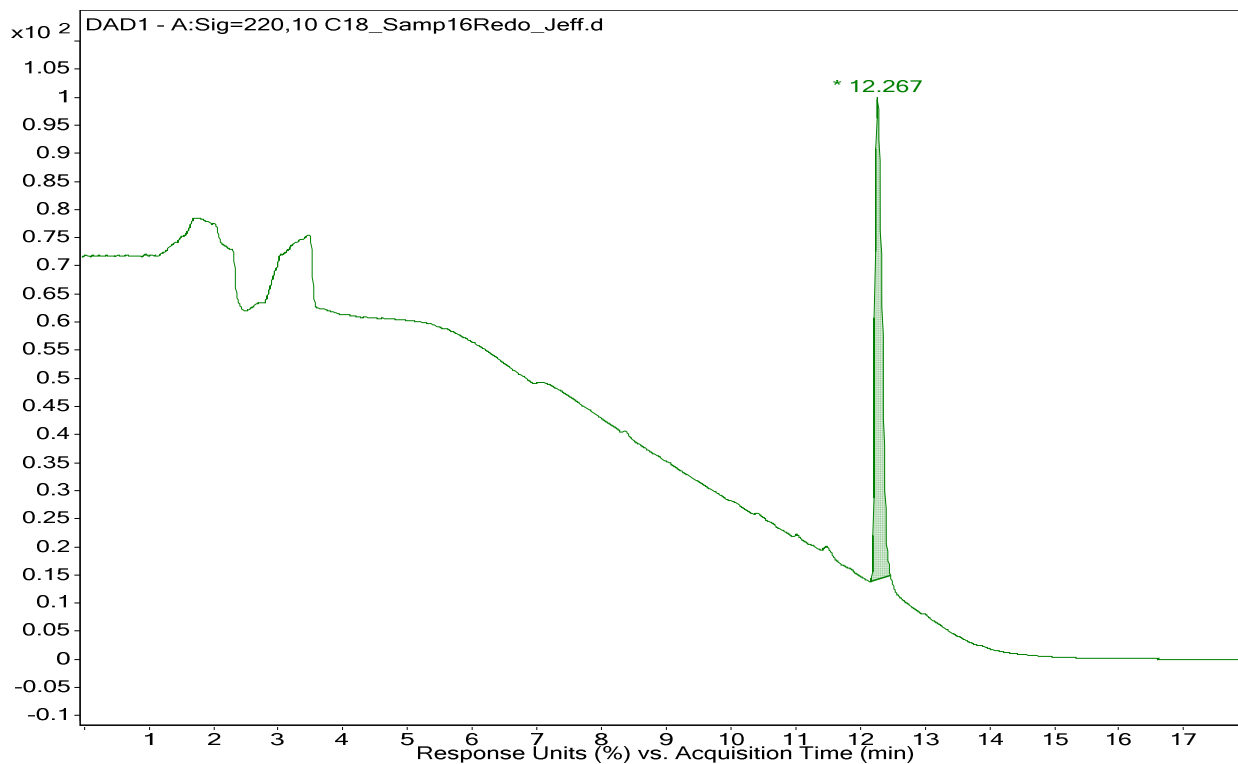

|               |                      |             |                      |                 |              |                        |                      |
|---------------|----------------------|-------------|----------------------|-----------------|--------------|------------------------|----------------------|
| Sample Name   | Sample16 redo        | Position    | Vial 7               | Instrument Name | Instrument 1 | User Name              | DYL                  |
| Inj Vol       | 3                    | InjPosition |                      | SampleType      | Unknown      | IRM Calibration Status | Some Ions Missed     |
| Data Filename | C18_Samp16Redo_Jeff. | ACQ Method  | C18 waters symmetry2 | Comment         |              | Acquired Time          | 9/20/2012 6:06:54 AM |

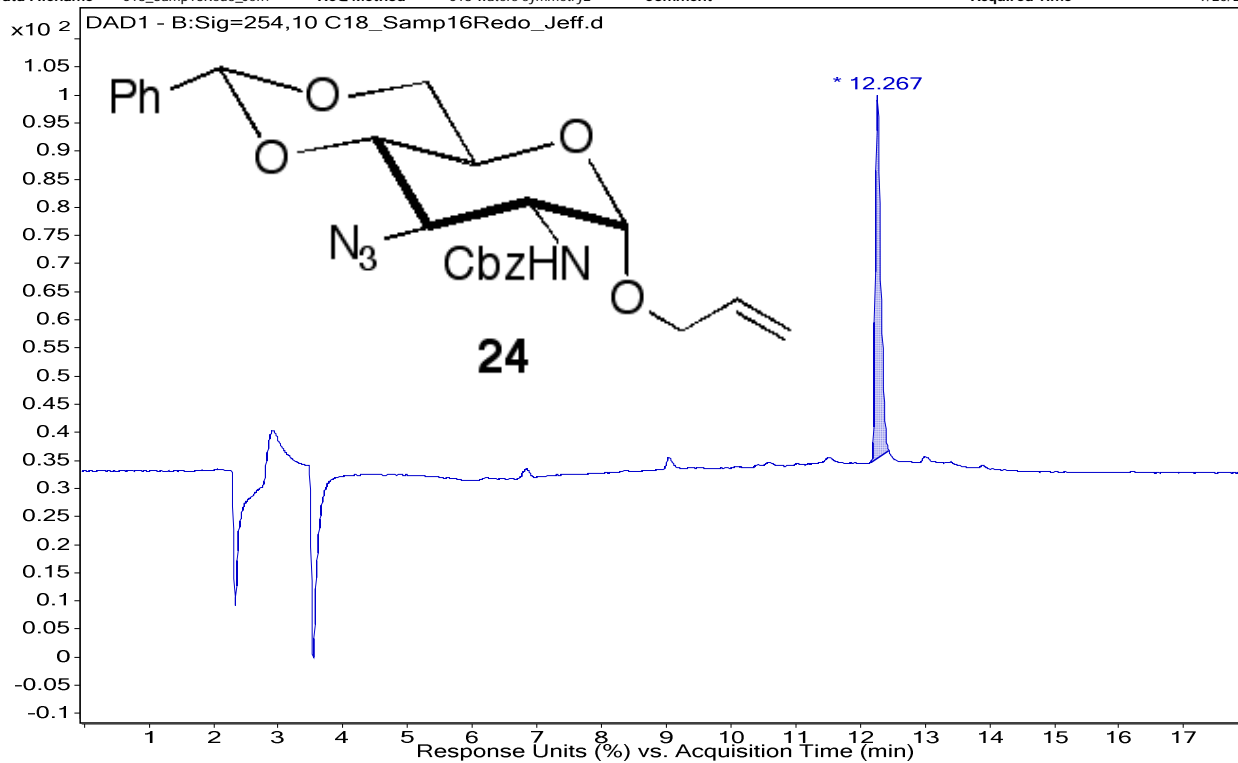

Analysis on a Waters SymmetryShield™ C18 (4.6 mm X 15 cm (i.d. x l.), 3.5 μm) at 0.5 mL/min. Solvent A: 50 mM NH<sub>4</sub>OAc (aq); B: CH<sub>3</sub>CN

| Time (min) | % B |
|------------|-----|
| 0          | 20  |
| 1          | 20  |
| 10         | 100 |
| 20         | 100 |

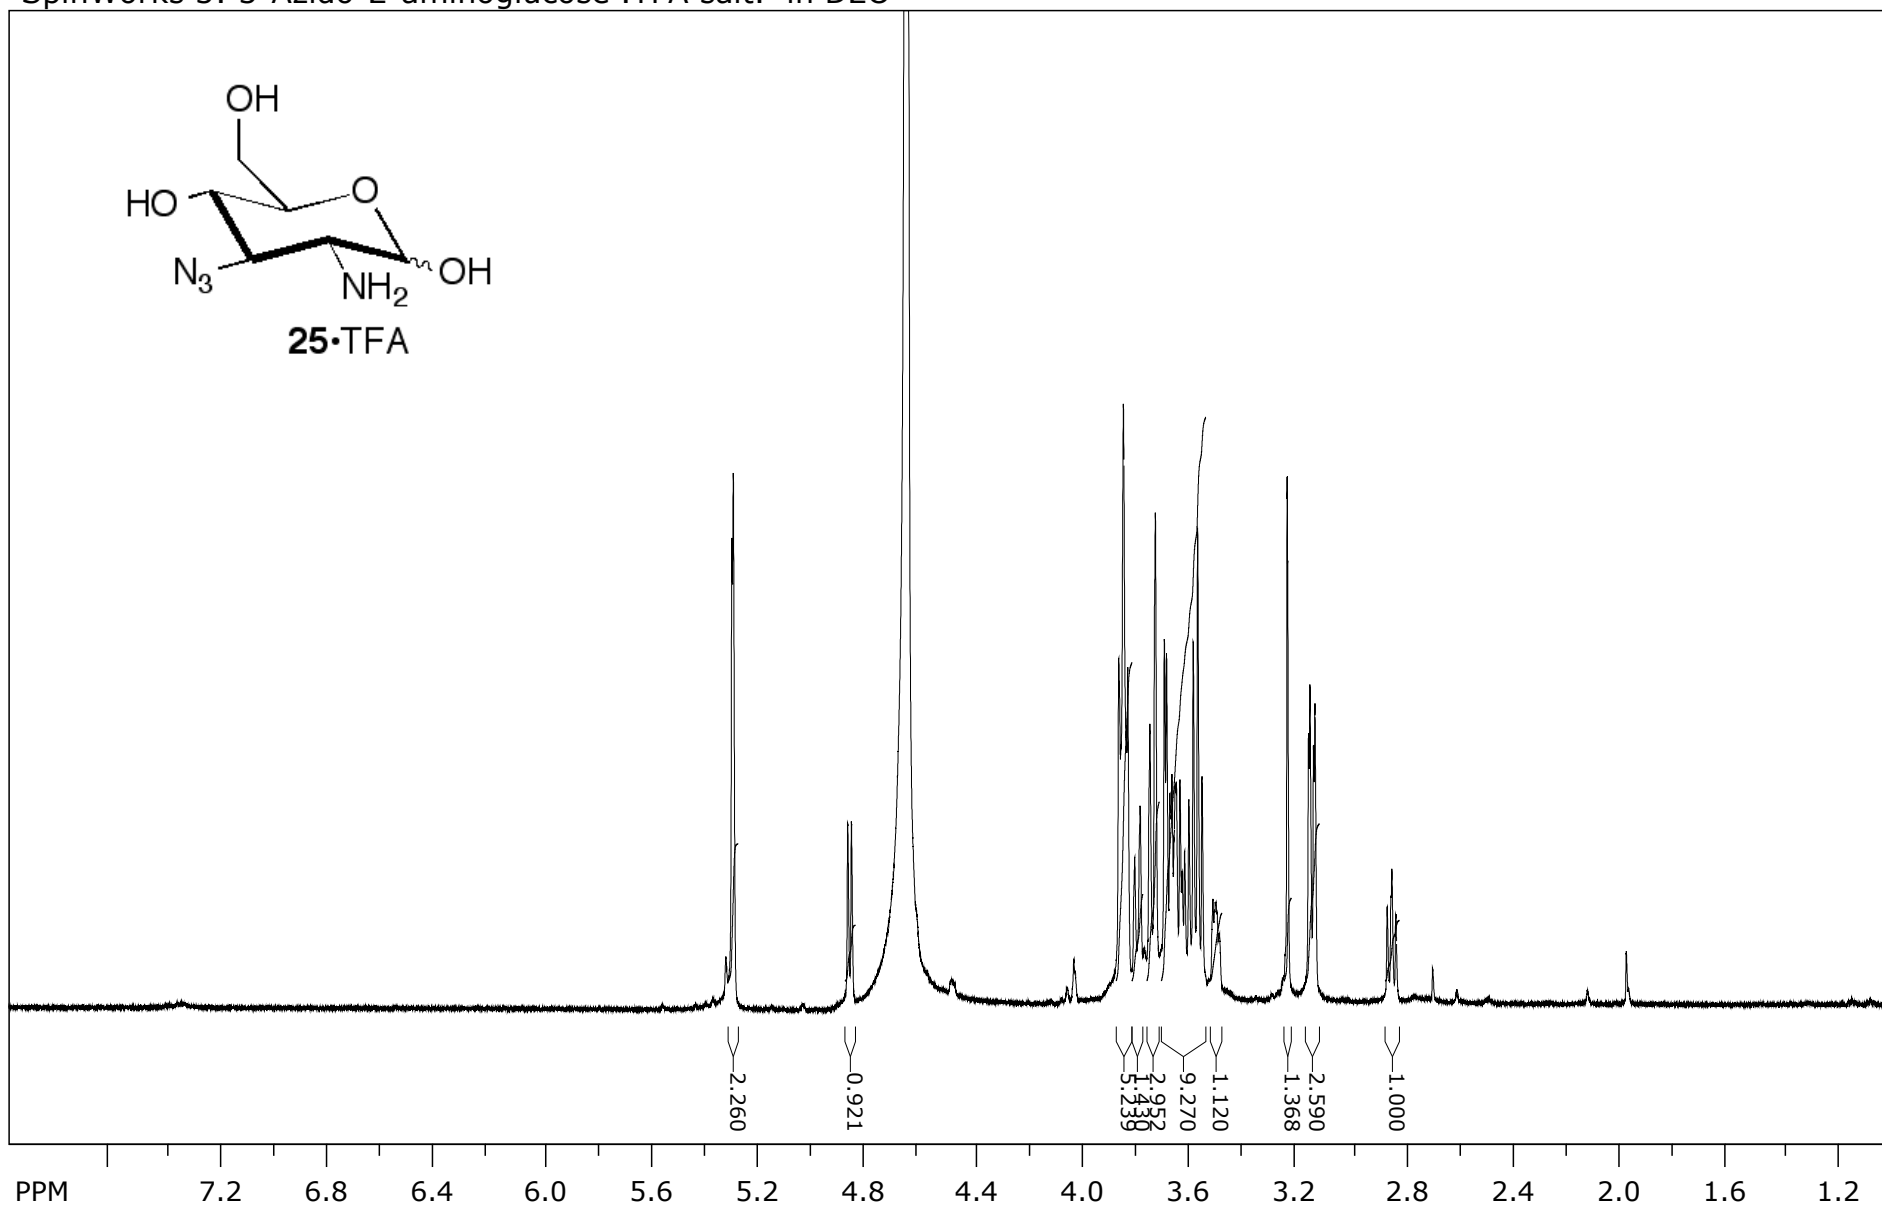

file: ... Data\Aug 2012\3N3GlcNH2\_D2O\1\fid expt: <zgpr>  
transmitter freq.: 600.553538 MHz  
time domain size: 65536 points  
width: 7211.54 Hz = 12.0082 ppm = 0.110039 Hz/pt  
number of scans: 32

freq. of 0 ppm: 600.550037 MHz  
processed size: 262144 complex points  
LB: 0.000 GF: 0.0000  
Hz/cm: 168.378 ppm/cm: 0.28037

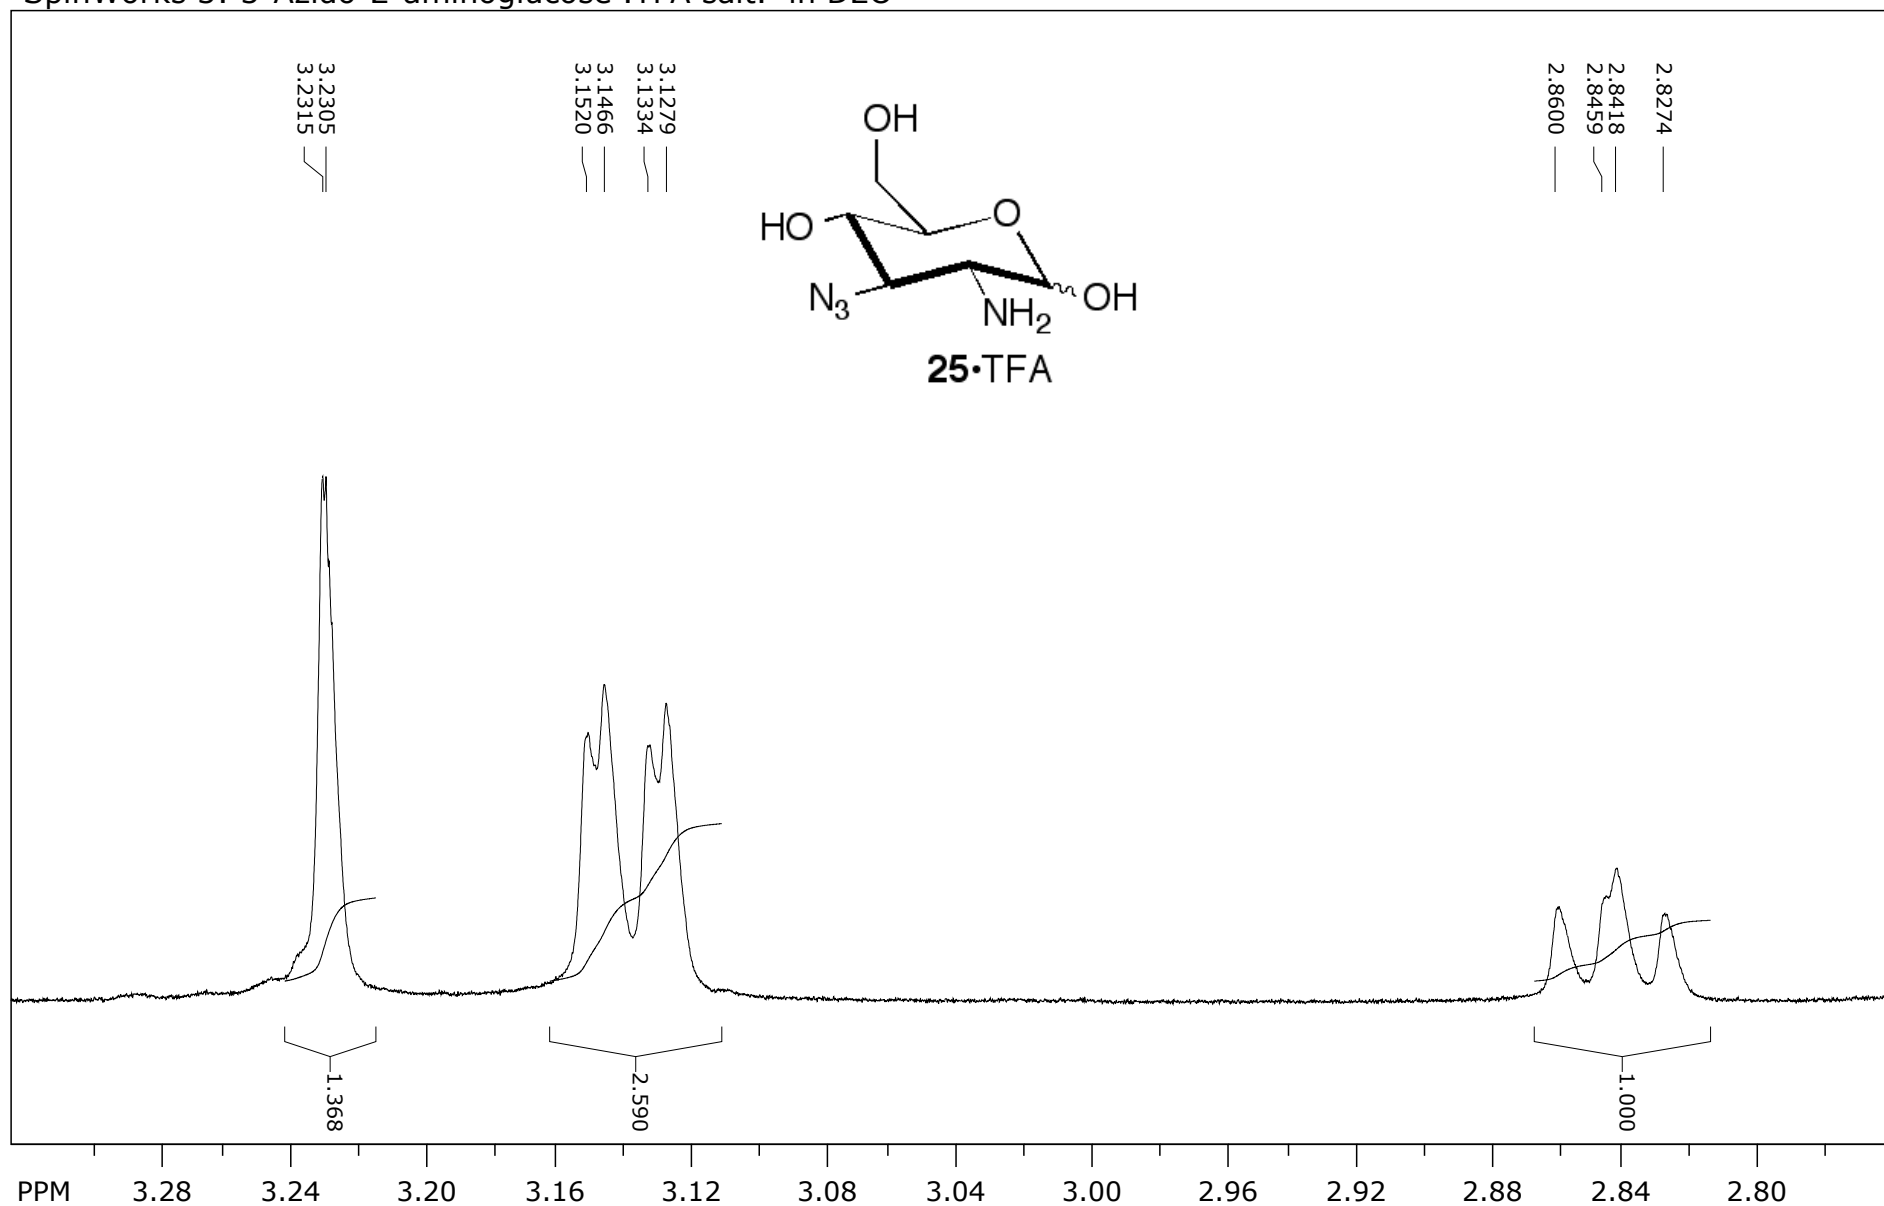

file: ... Data\Aug 2012\3N3GlcNH2\_D2O\1\fid expt: <zgpr>  
transmitter freq.: 600.553538 MHz  
time domain size: 65536 points  
width: 7211.54 Hz = 12.0082 ppm = 0.110039 Hz/pt  
number of scans: 32

freq. of 0 ppm: 600.550037 MHz  
processed size: 262144 complex points  
LB: 0.000 GF: 0.0000  
Hz/cm: 13.628 ppm/cm: 0.02269

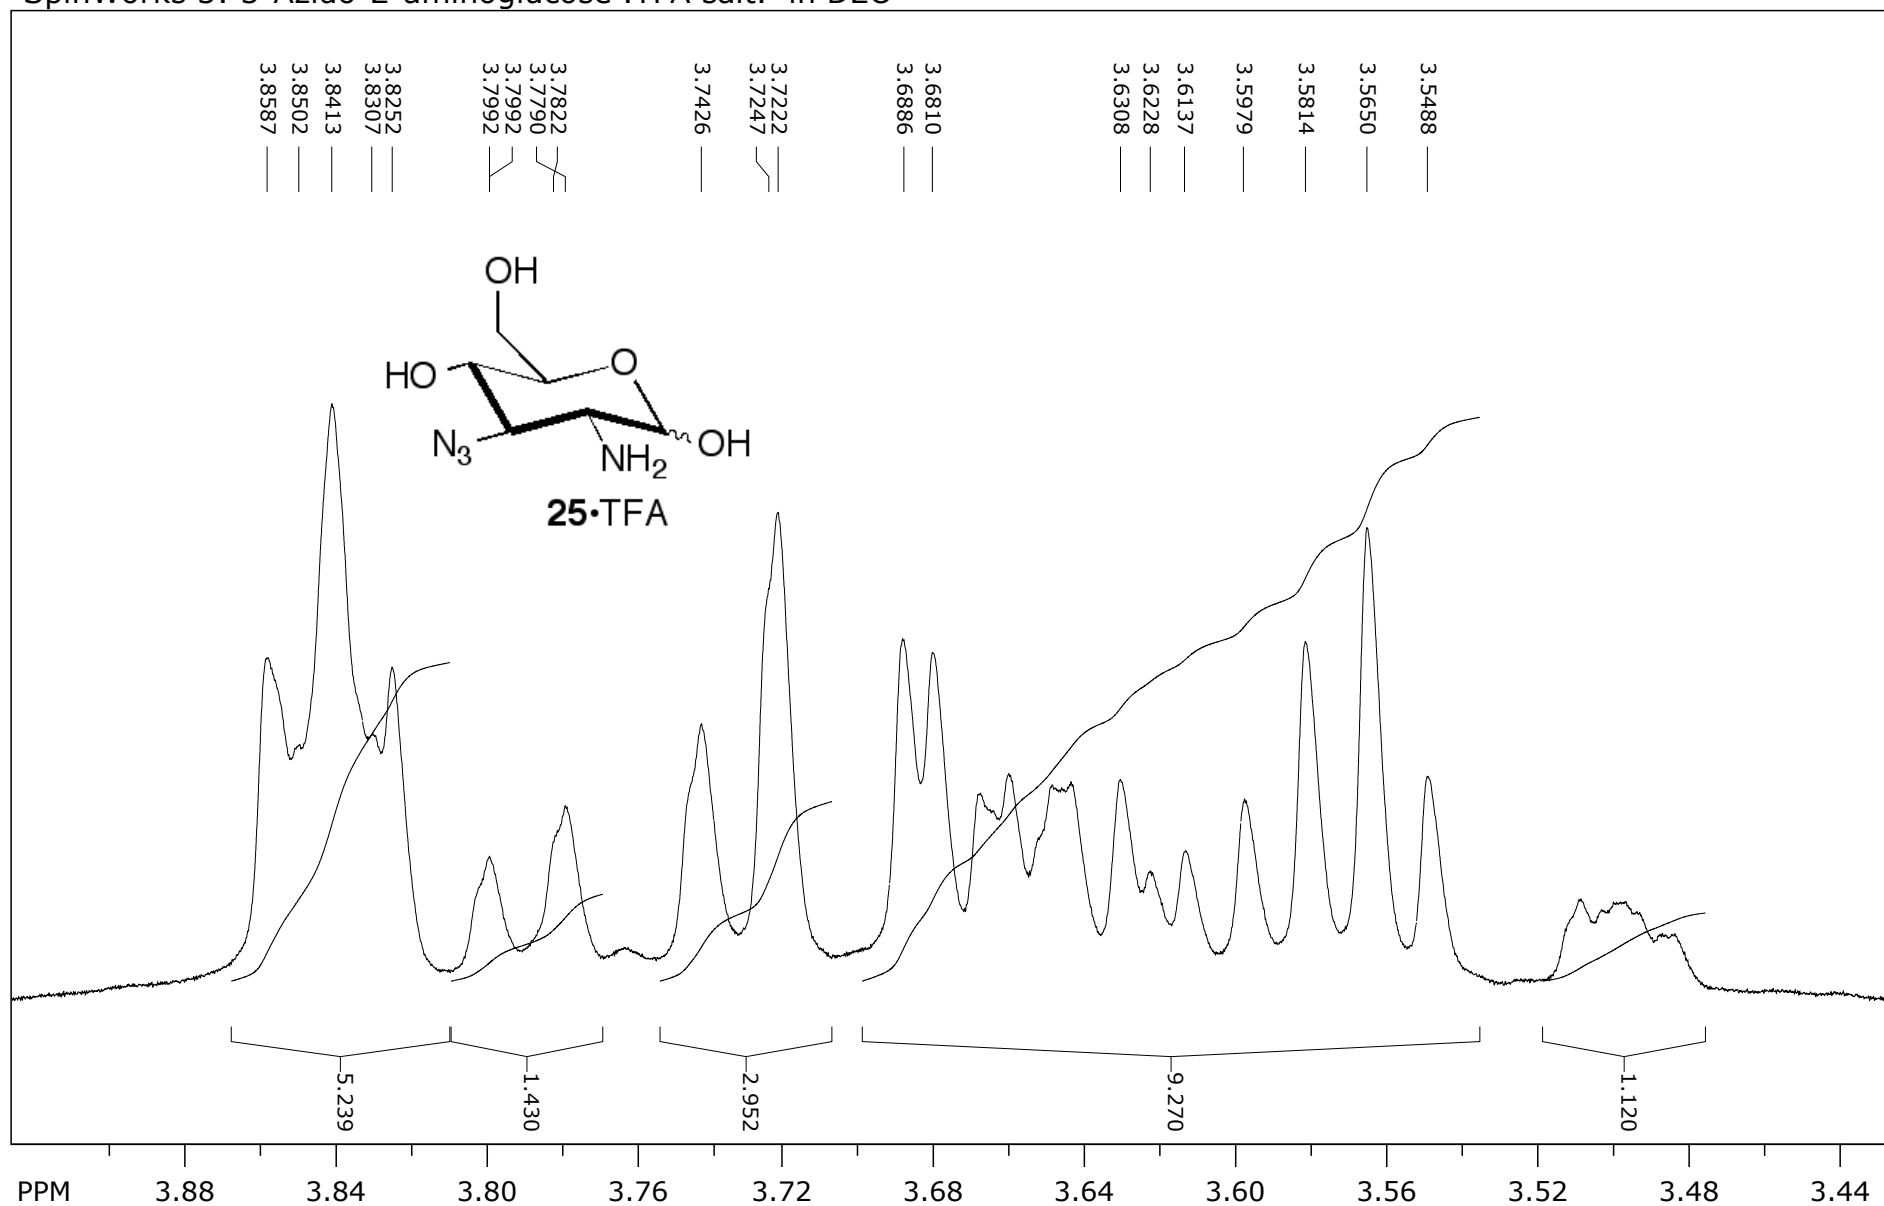

file: ... Data\Aug 2012\3N3GlcNH2\_D2O\1\fid expt: <zgpr>  
 transmitter freq.: 600.553538 MHz  
 time domain size: 65536 points  
 width: 7211.54 Hz = 12.0082 ppm = 0.110039 Hz/pt  
 number of scans: 32

freq. of 0 ppm: 600.550037 MHz  
 processed size: 262144 complex points  
 LB: 0.000 GF: 0.0000  
 Hz/cm: 12.073 ppm/cm: 0.02010

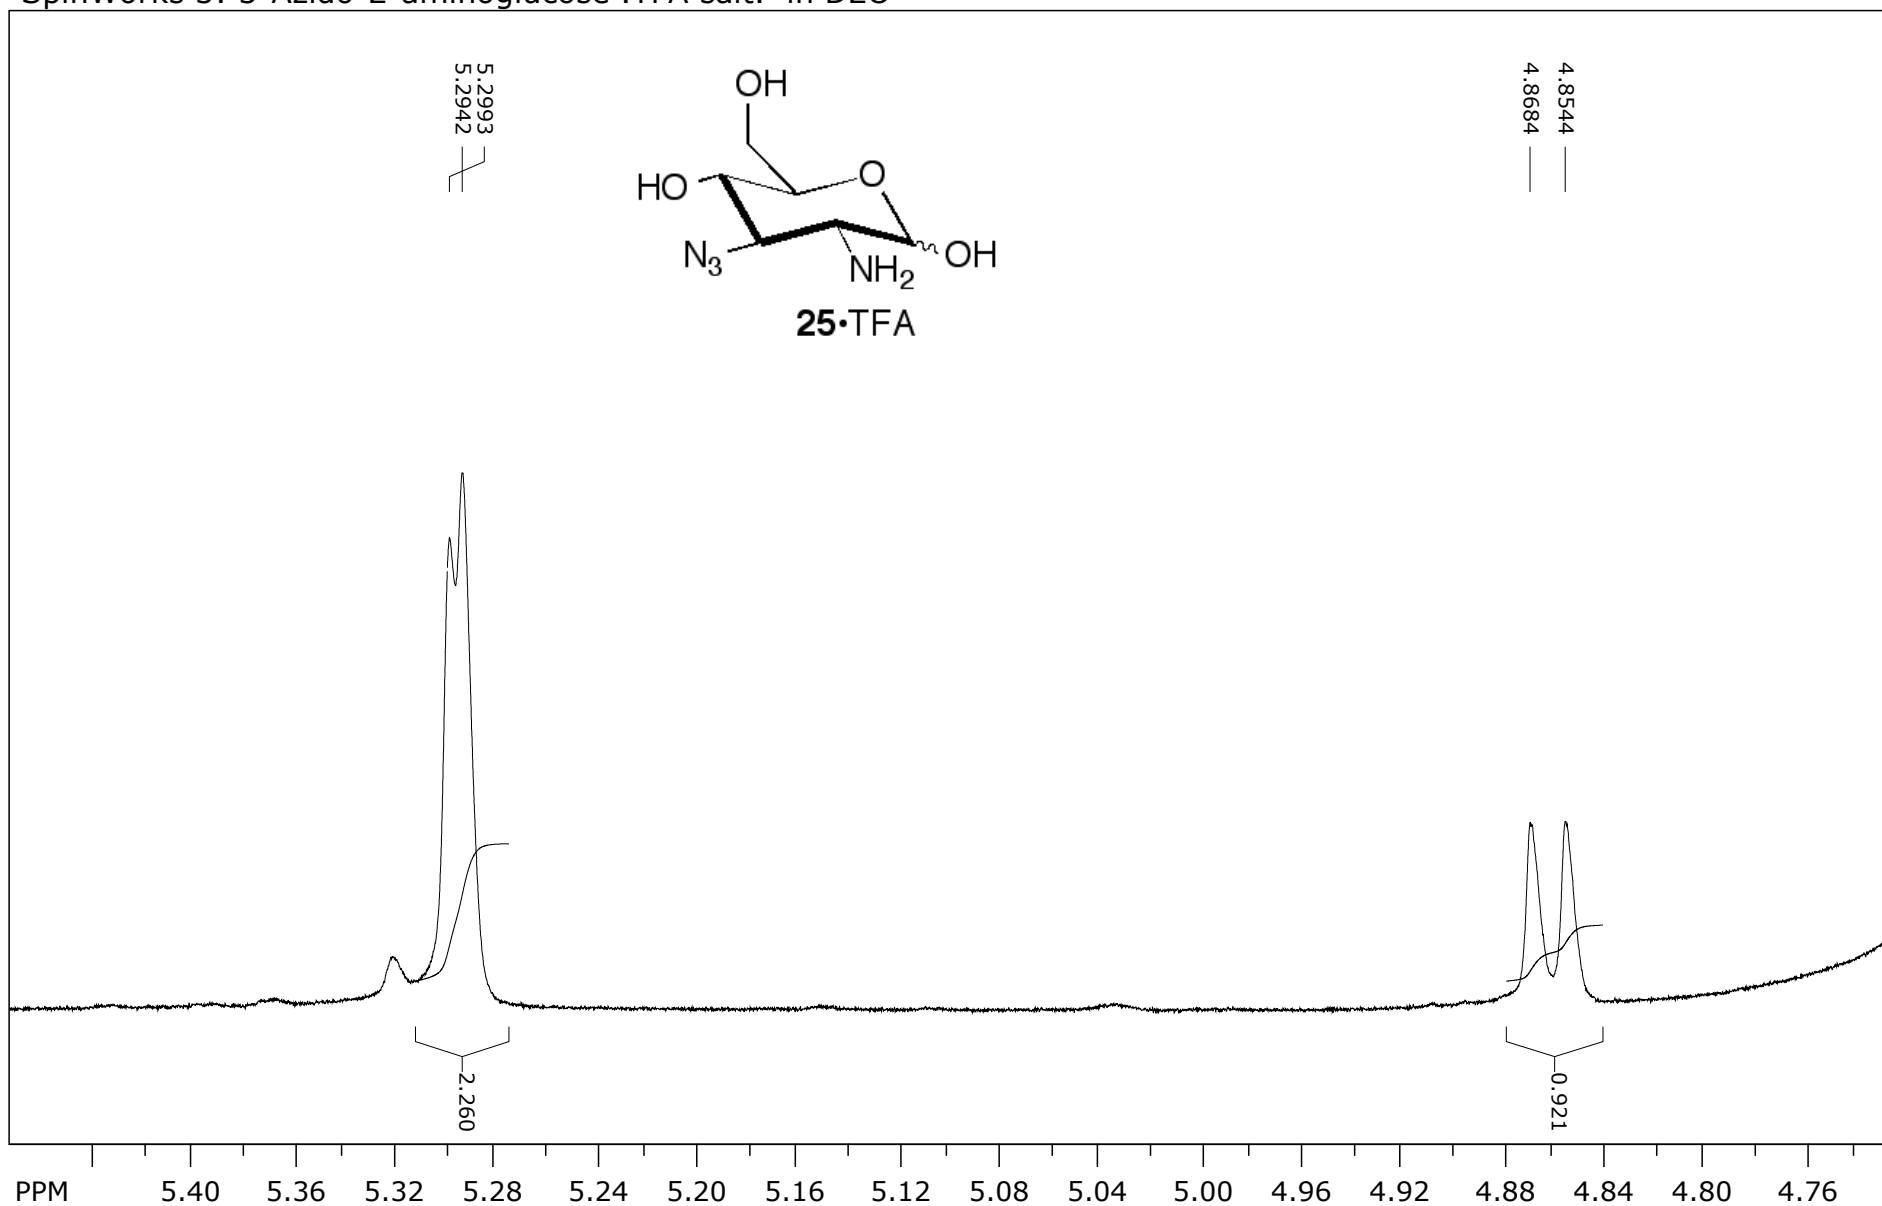

file: ... Data\Aug 2012\3N3GlcNH2\_D2O\1\fid expt: <zgpr>  
transmitter freq.: 600.553538 MHz  
time domain size: 65536 points  
width: 7211.54 Hz = 12.0082 ppm = 0.110039 Hz/pt  
number of scans: 32

freq. of 0 ppm: 600.550037 MHz  
processed size: 262144 complex points  
LB: 0.000 GF: 0.0000  
Hz/cm: 18.029 ppm/cm: 0.03002

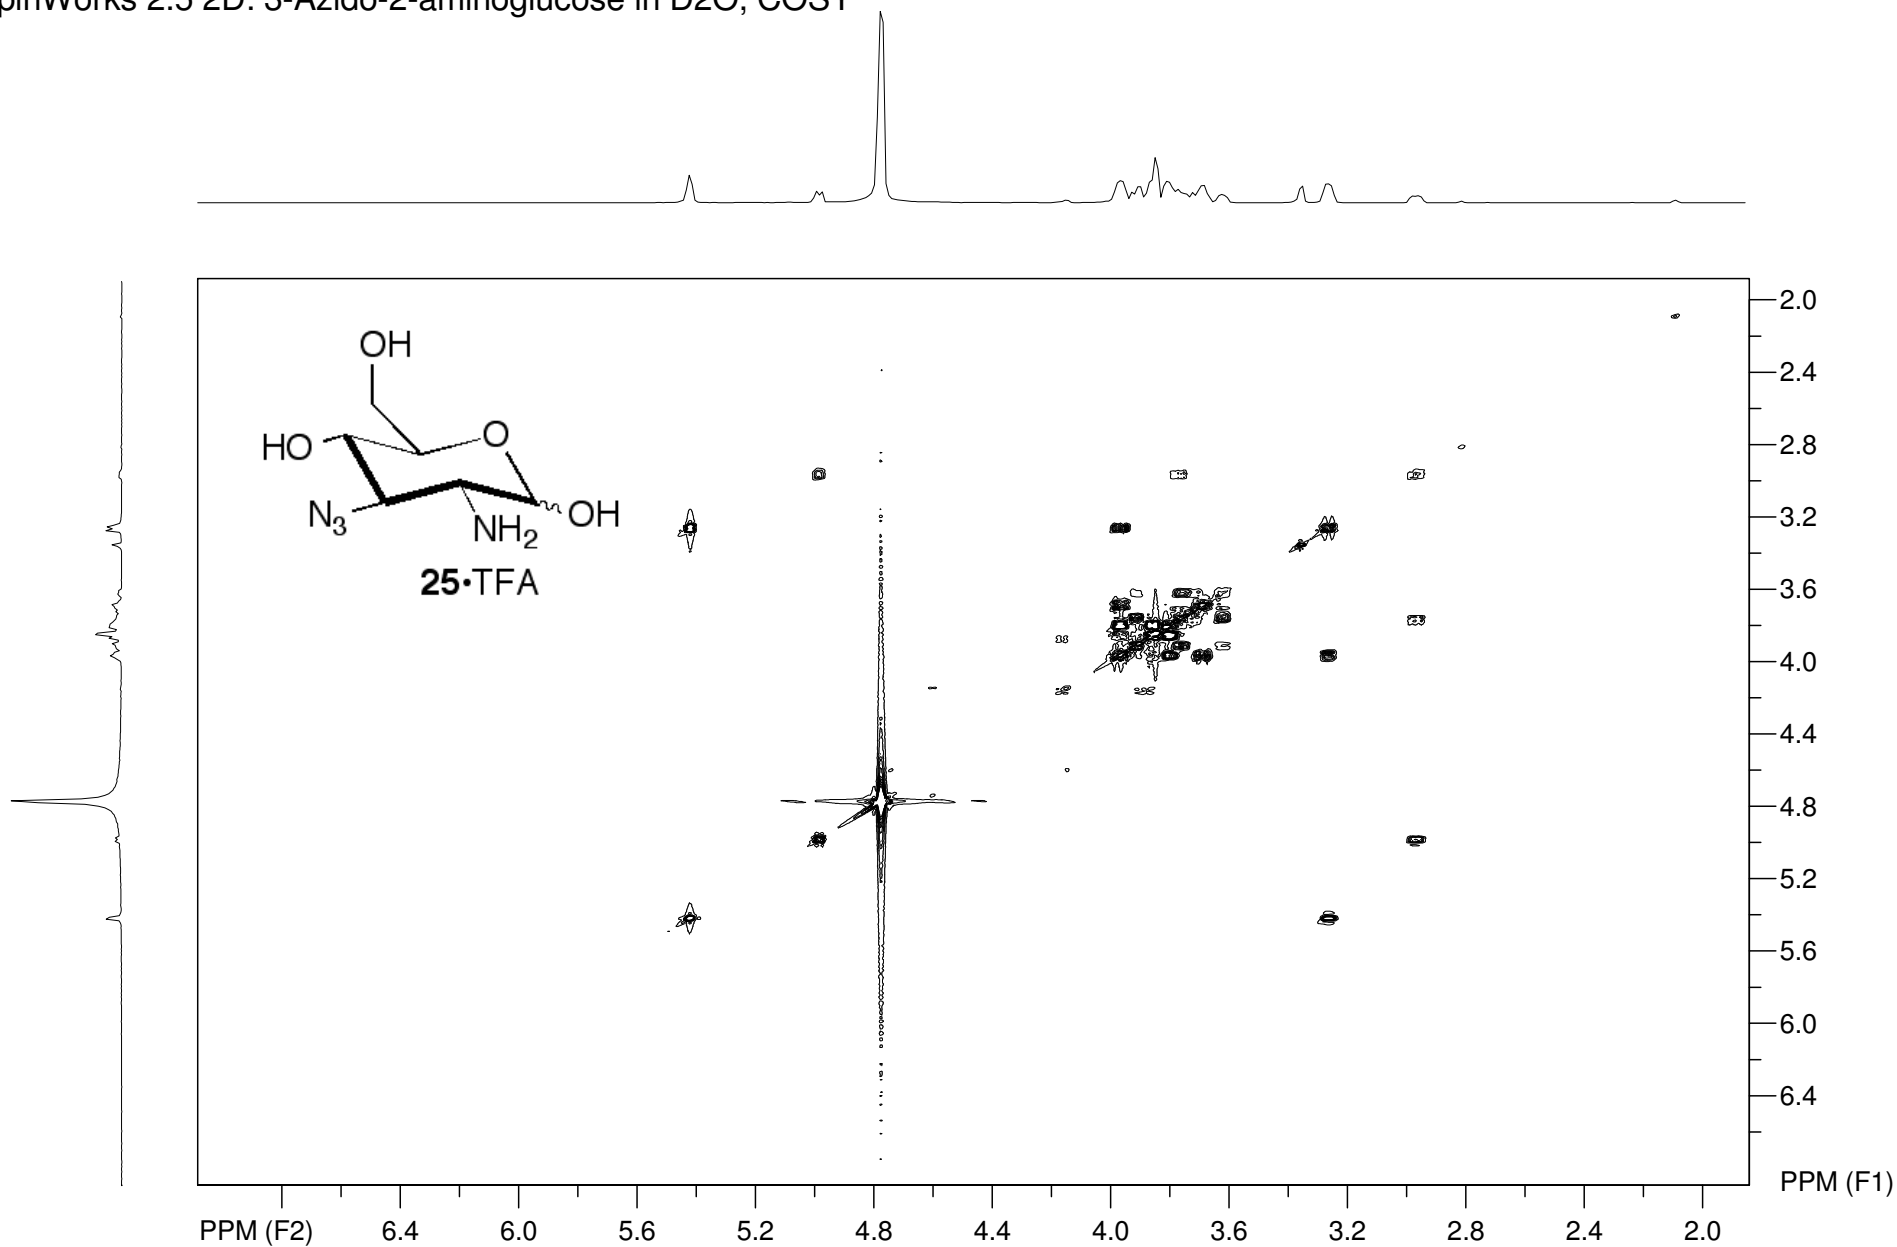

file: C:\Users\Jeff\Documents\NMR Folder\NMR Data\Aug 2012\3N3GlcNH2\_D2O\_COSY\2\ser  
transmitter freq.: 600.553566 MHz  
time domain size: 2048 by 2048 points  
width (F2): 6009.58 Hz = 10.006793 ppm = 2.934365 Hz/pt  
number of scans: 2

exptF2::freq. of 0 ppm: 600.549962 MHz  
processed size: 1024 complex points  
window function: Sine  
shift: 0.0 degrees  
Hz/cm: 153.572 ppm/cm: 0.25572

F1: freq. of 0 ppm: 600.549962 MHz  
processed size: 1024 complex points  
window function: Sine  
shift: 0.0 degrees  
Hz/cm: 250.871 ppm/cm: 0.41773

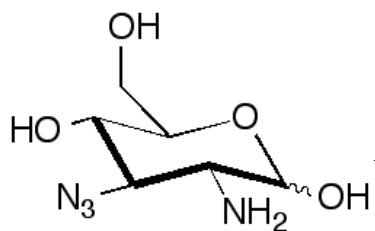

25·TFA

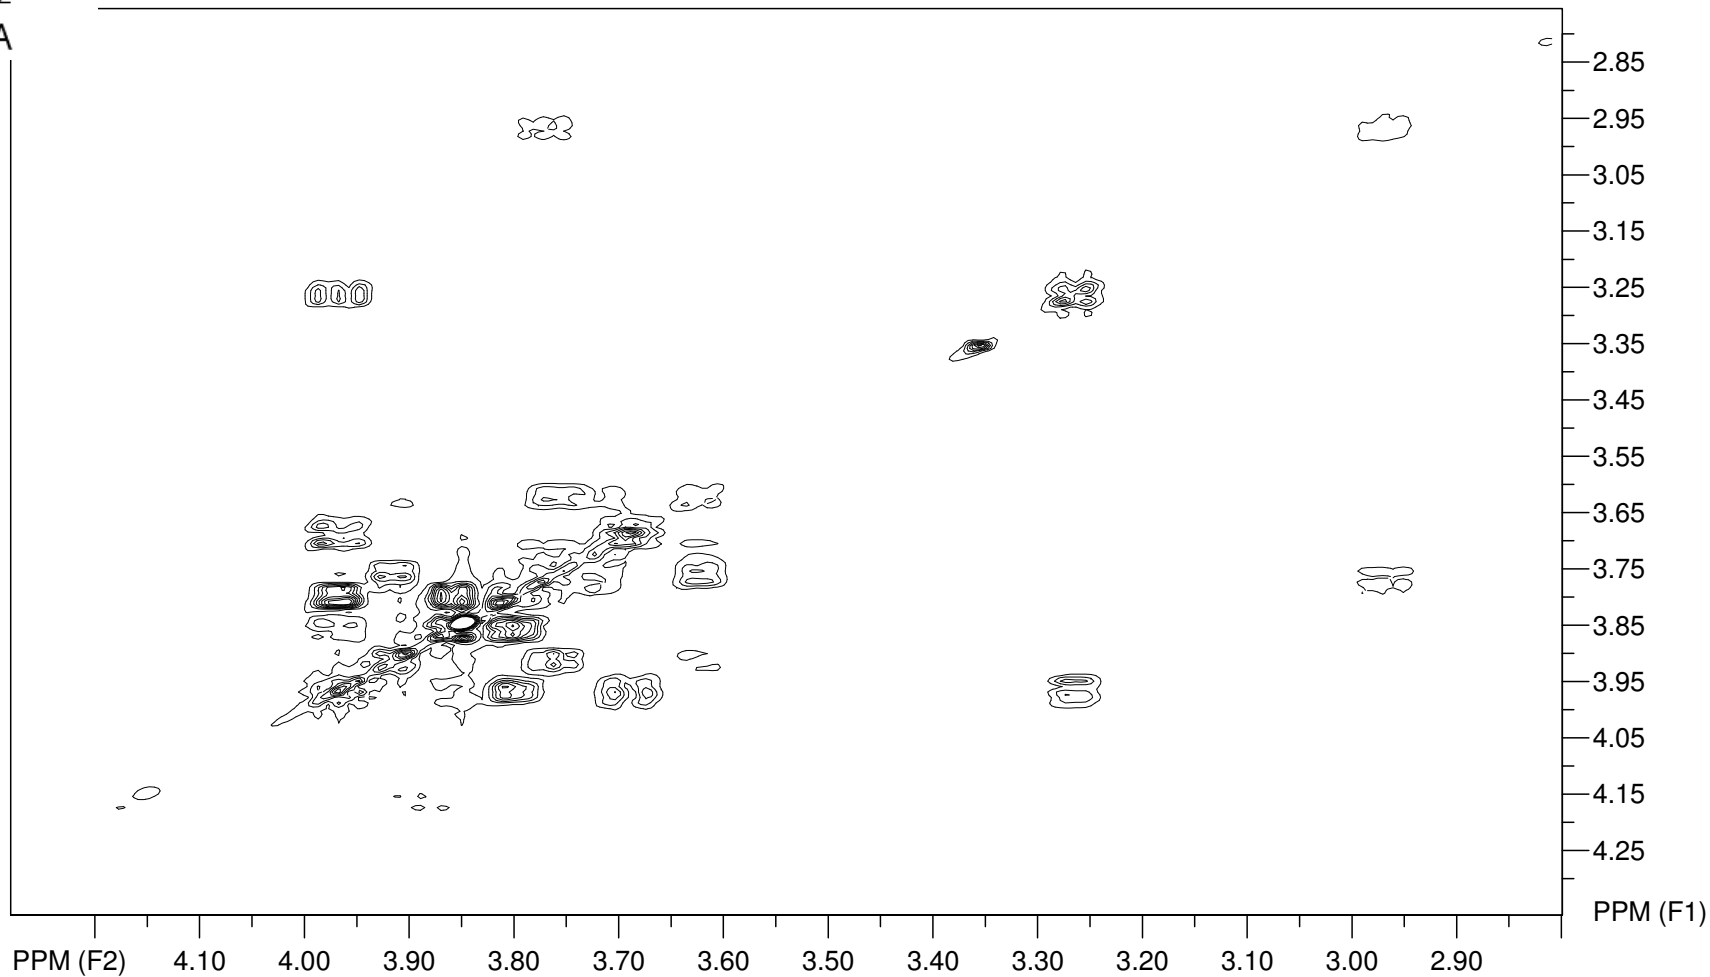

file: C:\Users\Jeff\Documents\NMR Folder\NMR Data\Aug 2012\3N3GlcNH2\_D2O\_COSY\2\ser  
transmitter freq.: 600.553566 MHz  
time domain size: 2048 by 2048 points  
width (F2): 6009.58 Hz = 10.006793 ppm = 2.934365 Hz/pt  
number of scans: 2

exptF2: freq. of 0 ppm: 600.549962 MHz  
processed size: 1024 complex points  
window function: Sine  
shift: 0.0 degrees  
Hz/cm: 43.394 ppm/cm: 0.07226

F1: freq. of 0 ppm: 600.549962 MHz  
processed size: 1024 complex points  
window function: Sine  
shift: 0.0 degrees  
Hz/cm: 80.580 ppm/cm: 0.13418



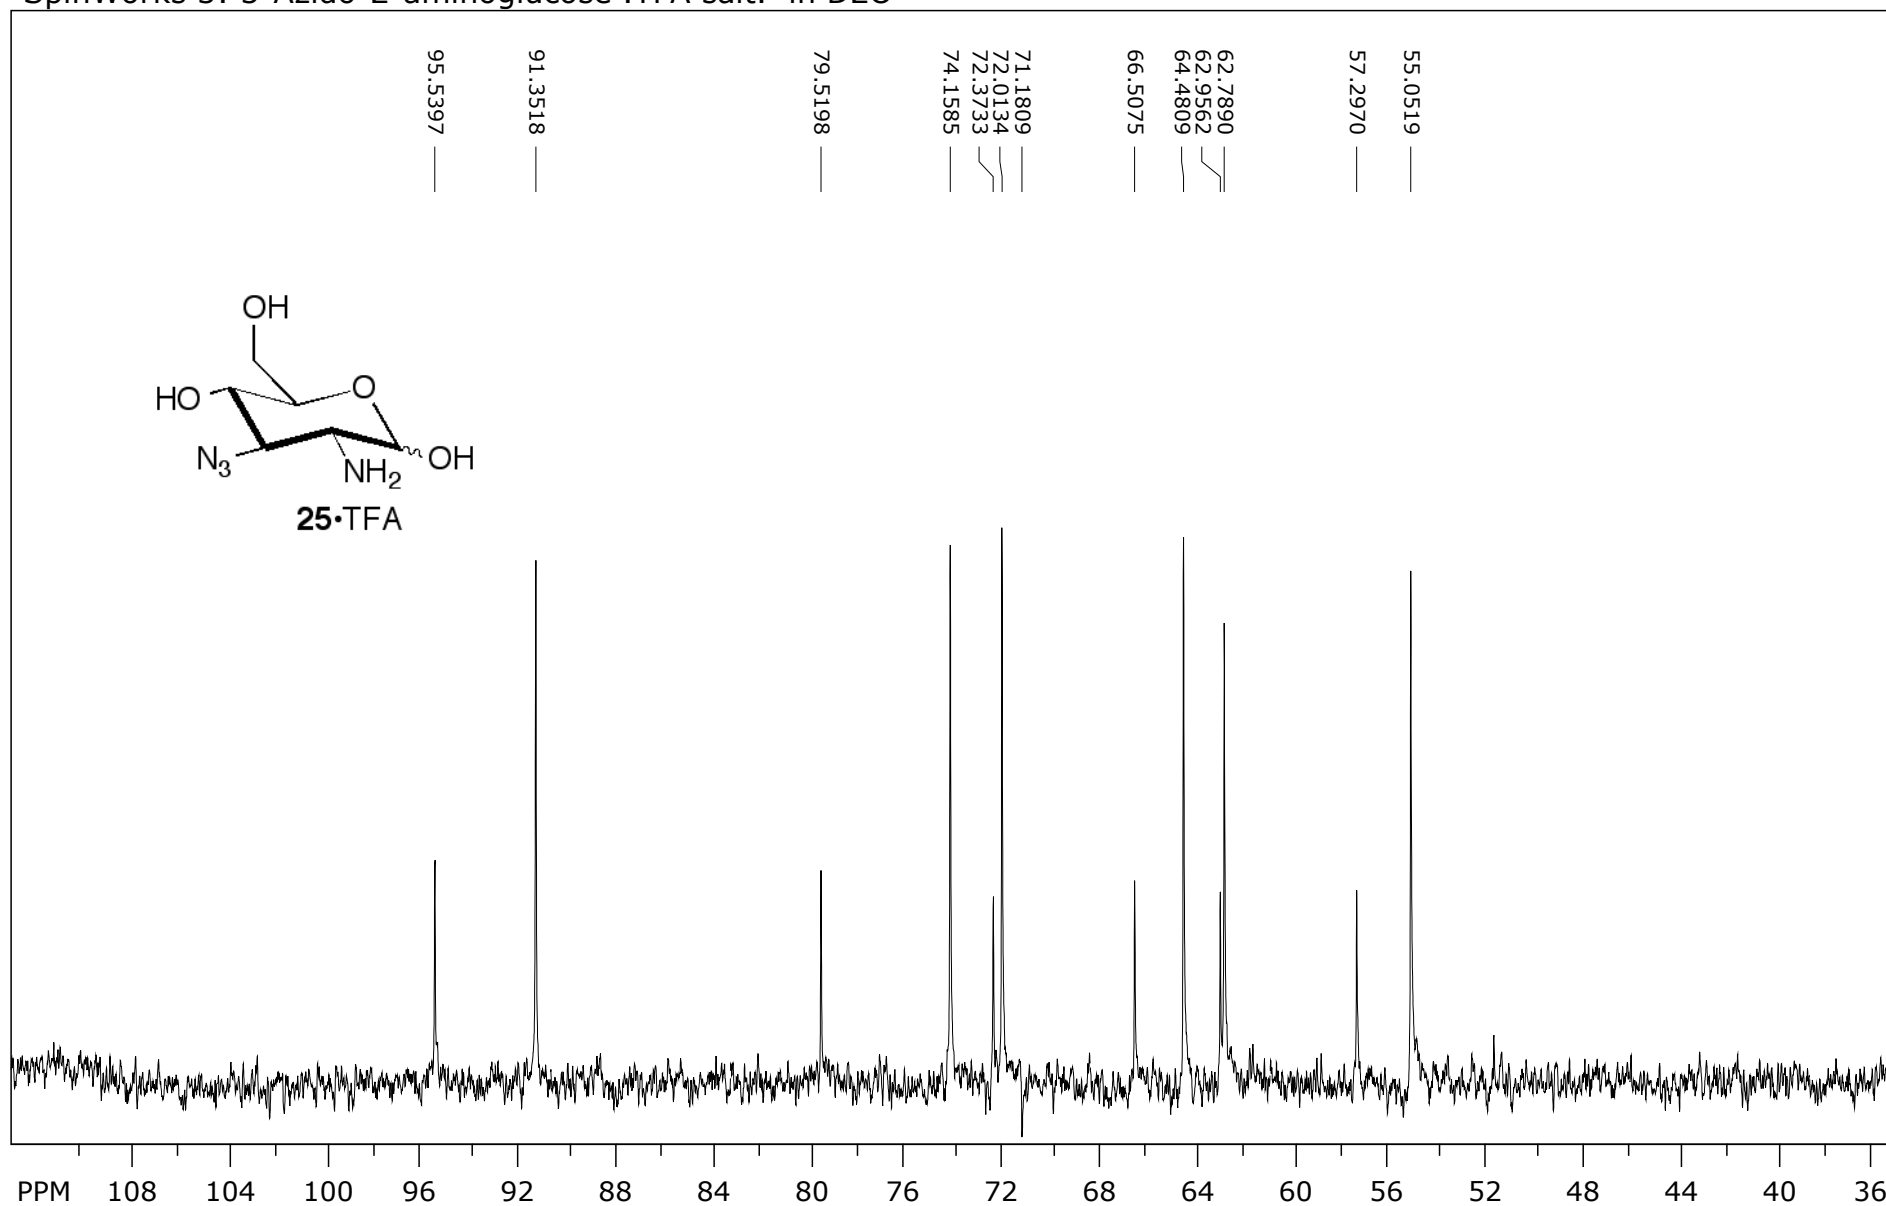

file: ...a\Aug 2012\3N3GlcNH2\_D2O\_13C\1\fid expt: <zgpg30>  
transmitter freq.: 151.023519 MHz  
time domain size: 65536 points  
width: 36057.69 Hz = 238.7555 ppm = 0.550197 Hz/pt  
number of scans: 30720

freq. of 0 ppm: 151.008006 MHz  
processed size: 32768 complex points  
LB: 5.000 GF: 0.0000  
Hz/cm: 471.647 ppm/cm: 3.12301

| Sample Name   | Position    | Instrument Name | User Name              |
|---------------|-------------|-----------------|------------------------|
| Inj Vol       | InjPosition | SampleType      | IRM Calibration Status |
| Data Filename | ACQ Method  | Comment         | Acquired Time          |

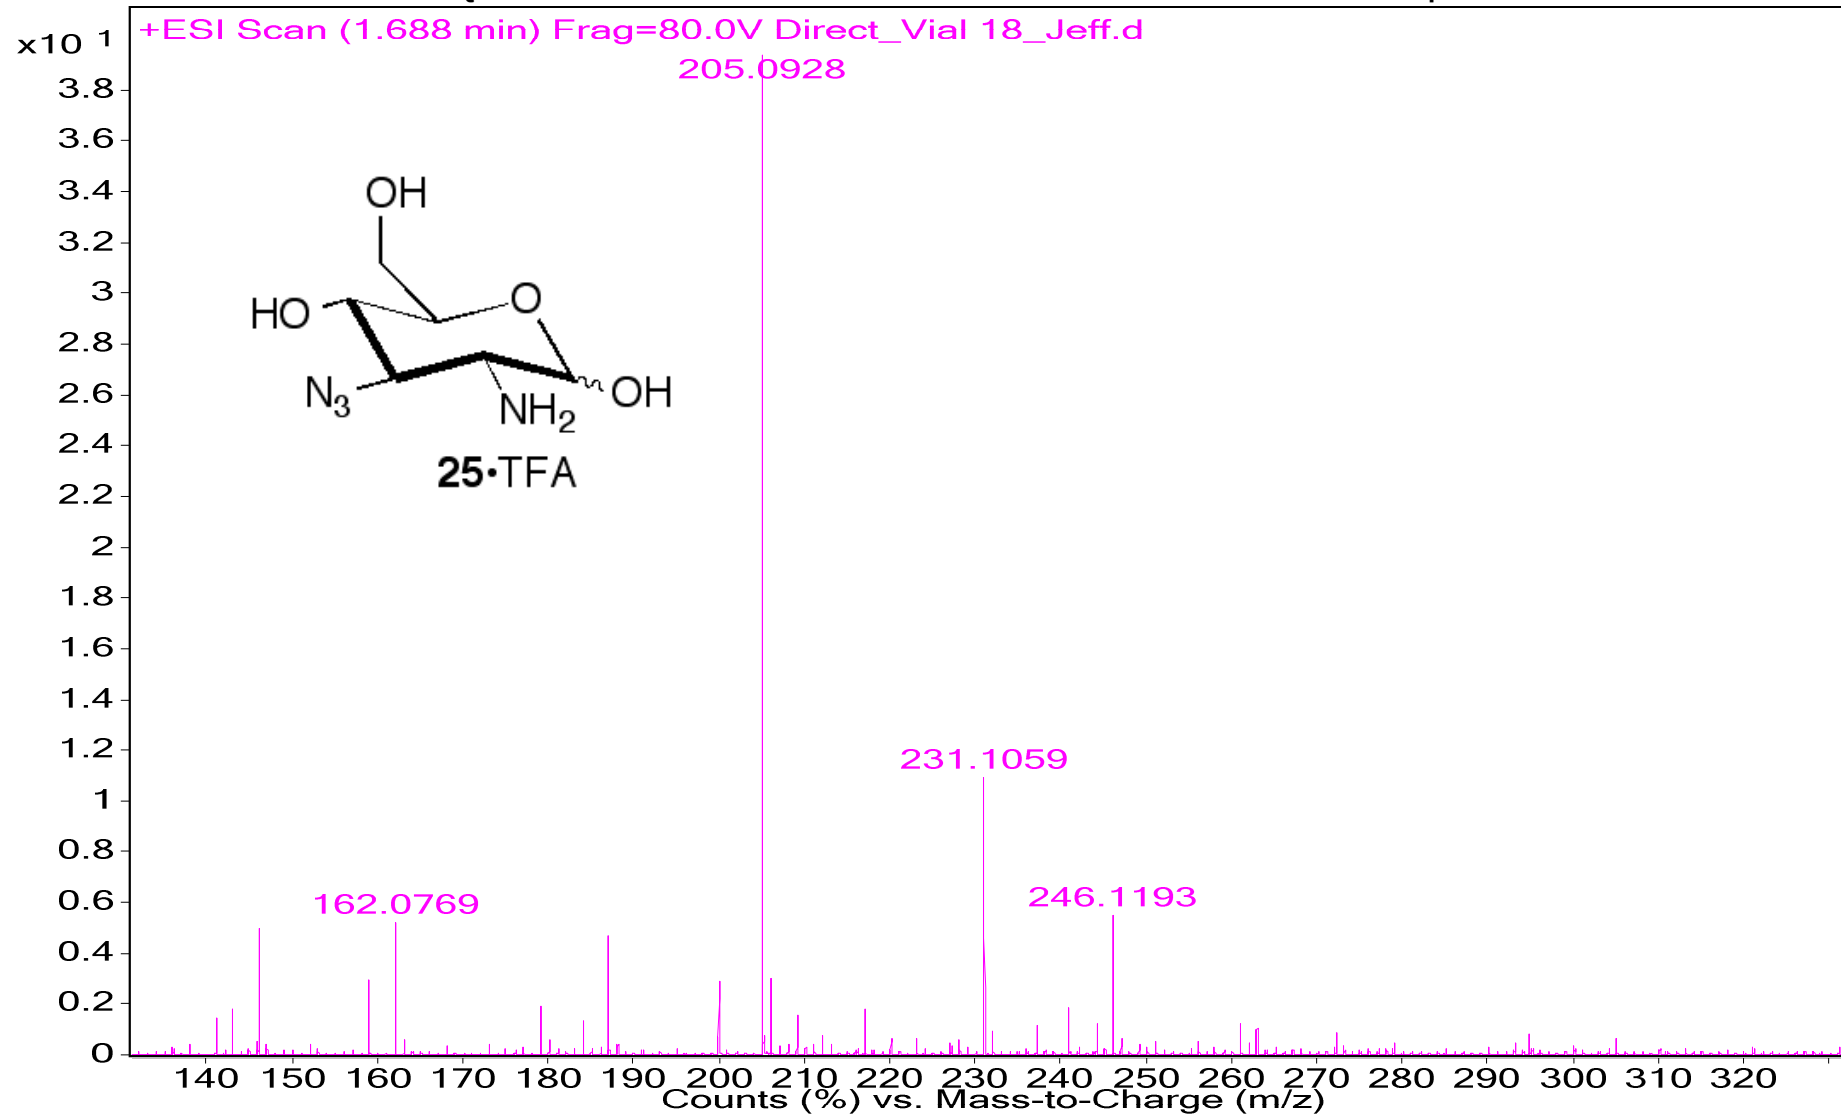

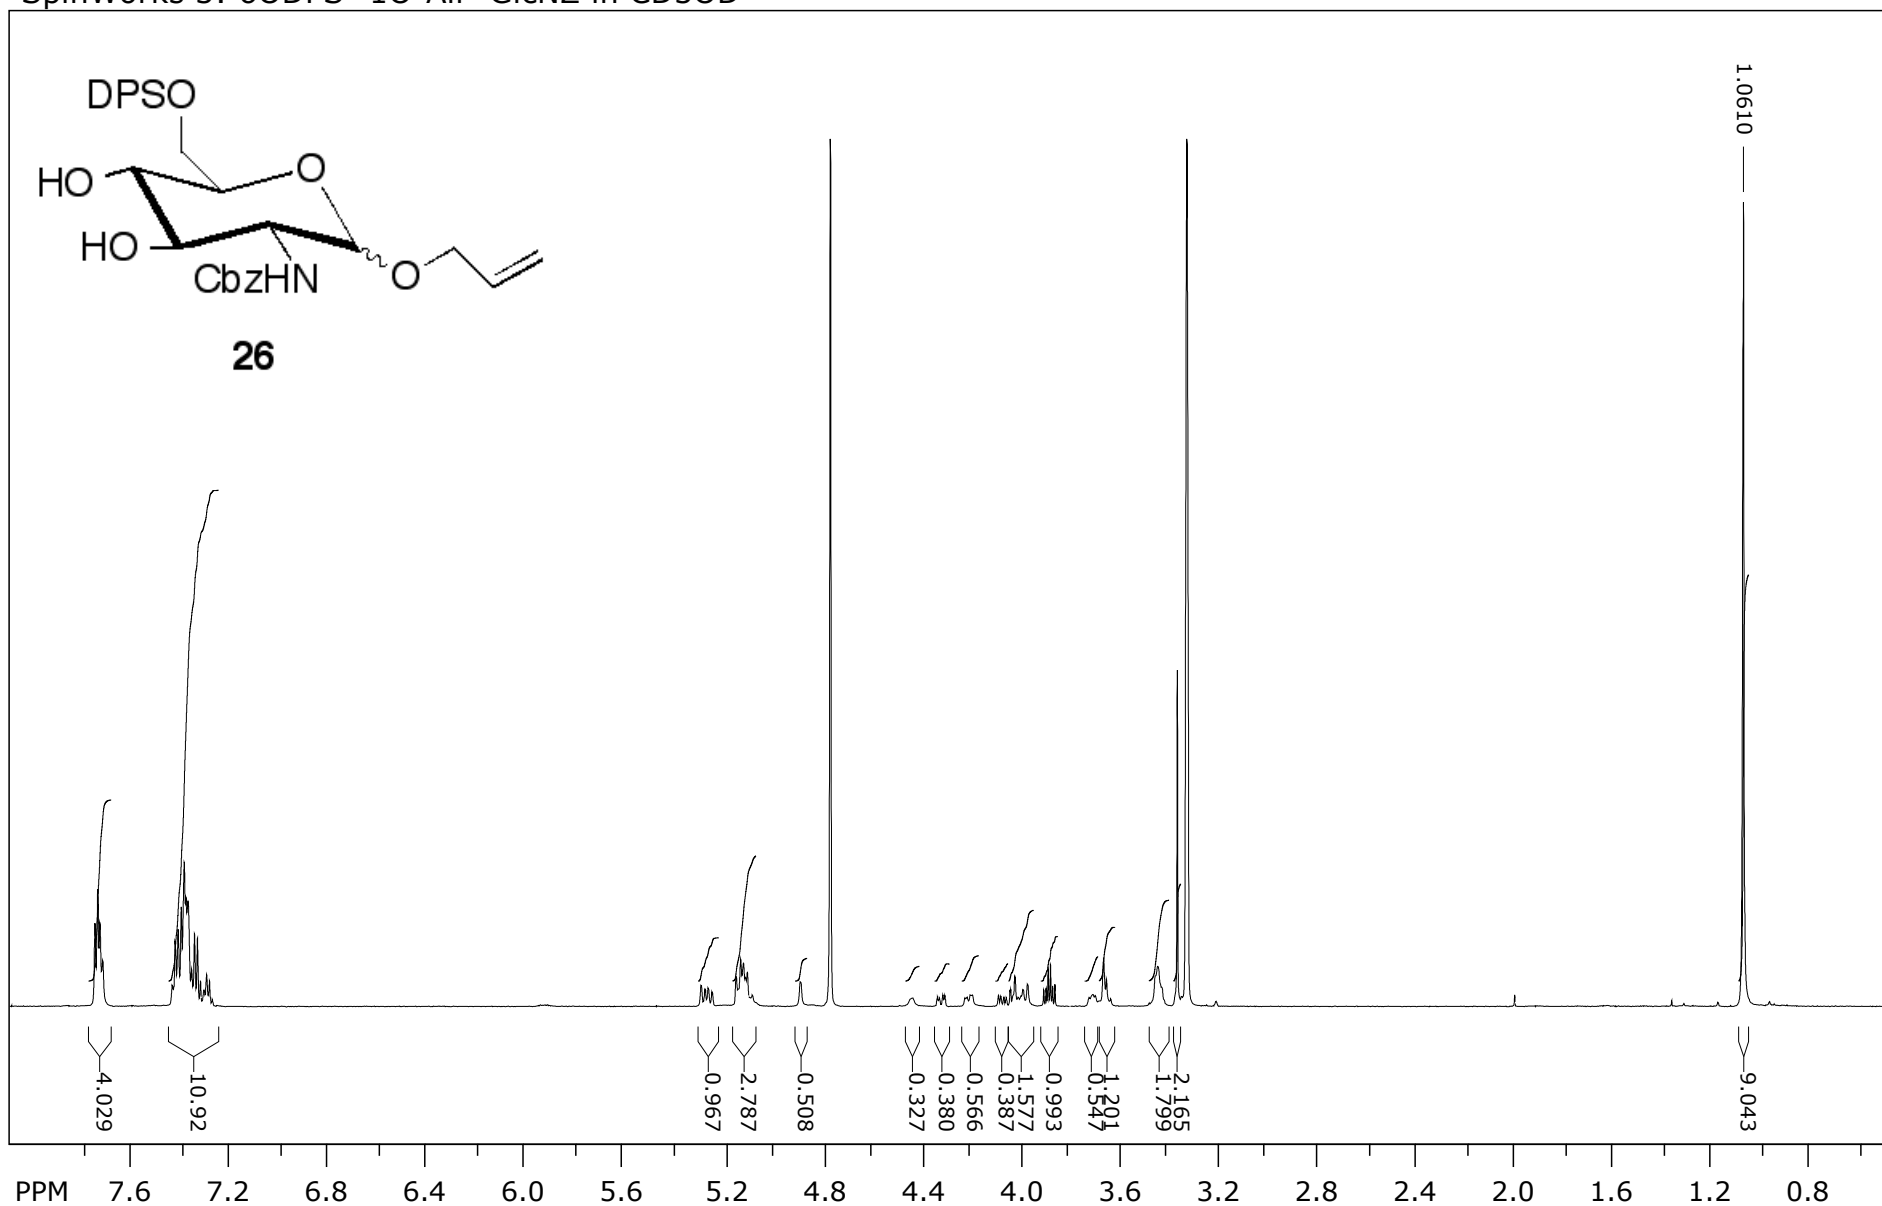

file: ...der\NMR Data\6DPS34OH2\_CD3OD\1\fid exp: <zgr>  
transmitter freq.: 600.553538 MHz  
time domain size: 65536 points  
width: 7211.54 Hz = 12.0082 ppm = 0.110039 Hz/pt  
number of scans: 32

freq. of 0 ppm: 600.550010 MHz  
processed size: 262144 complex points  
LB: 0.000 GF: 0.0000  
Hz/cm: 183.669 ppm/cm: 0.30583

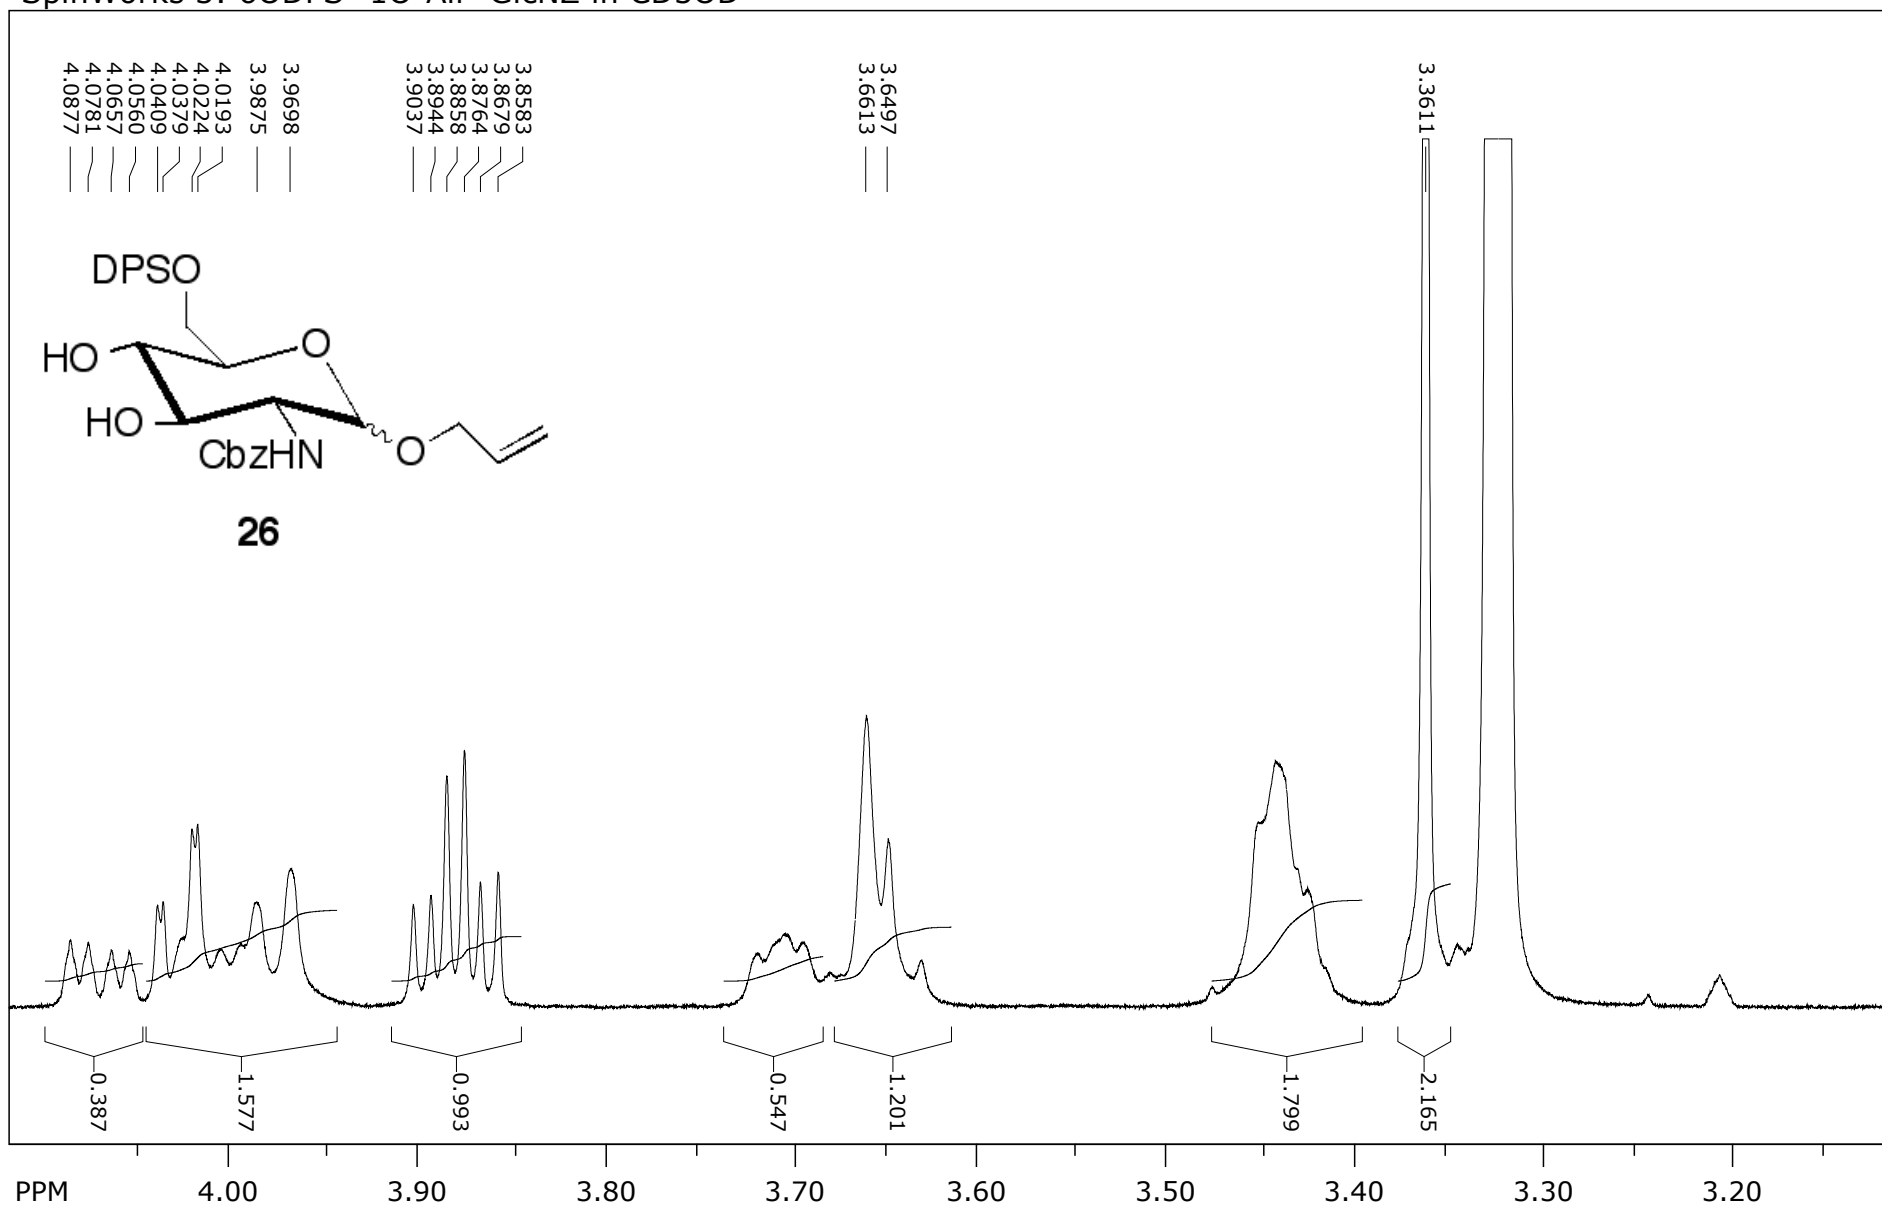

file: ...der\NMR Data\6DPS34OH2\_CD3OD\1\fid expt: <zgr>  
 transmitter freq.: 600.553538 MHz  
 time domain size: 65536 points  
 width: 7211.54 Hz = 12.0082 ppm = 0.110039 Hz/pt  
 number of scans: 32

freq. of 0 ppm: 600.550010 MHz  
 processed size: 262144 complex points  
 LB: 0.000 GF: 0.0000  
 Hz/cm: 24.234 ppm/cm: 0.04035

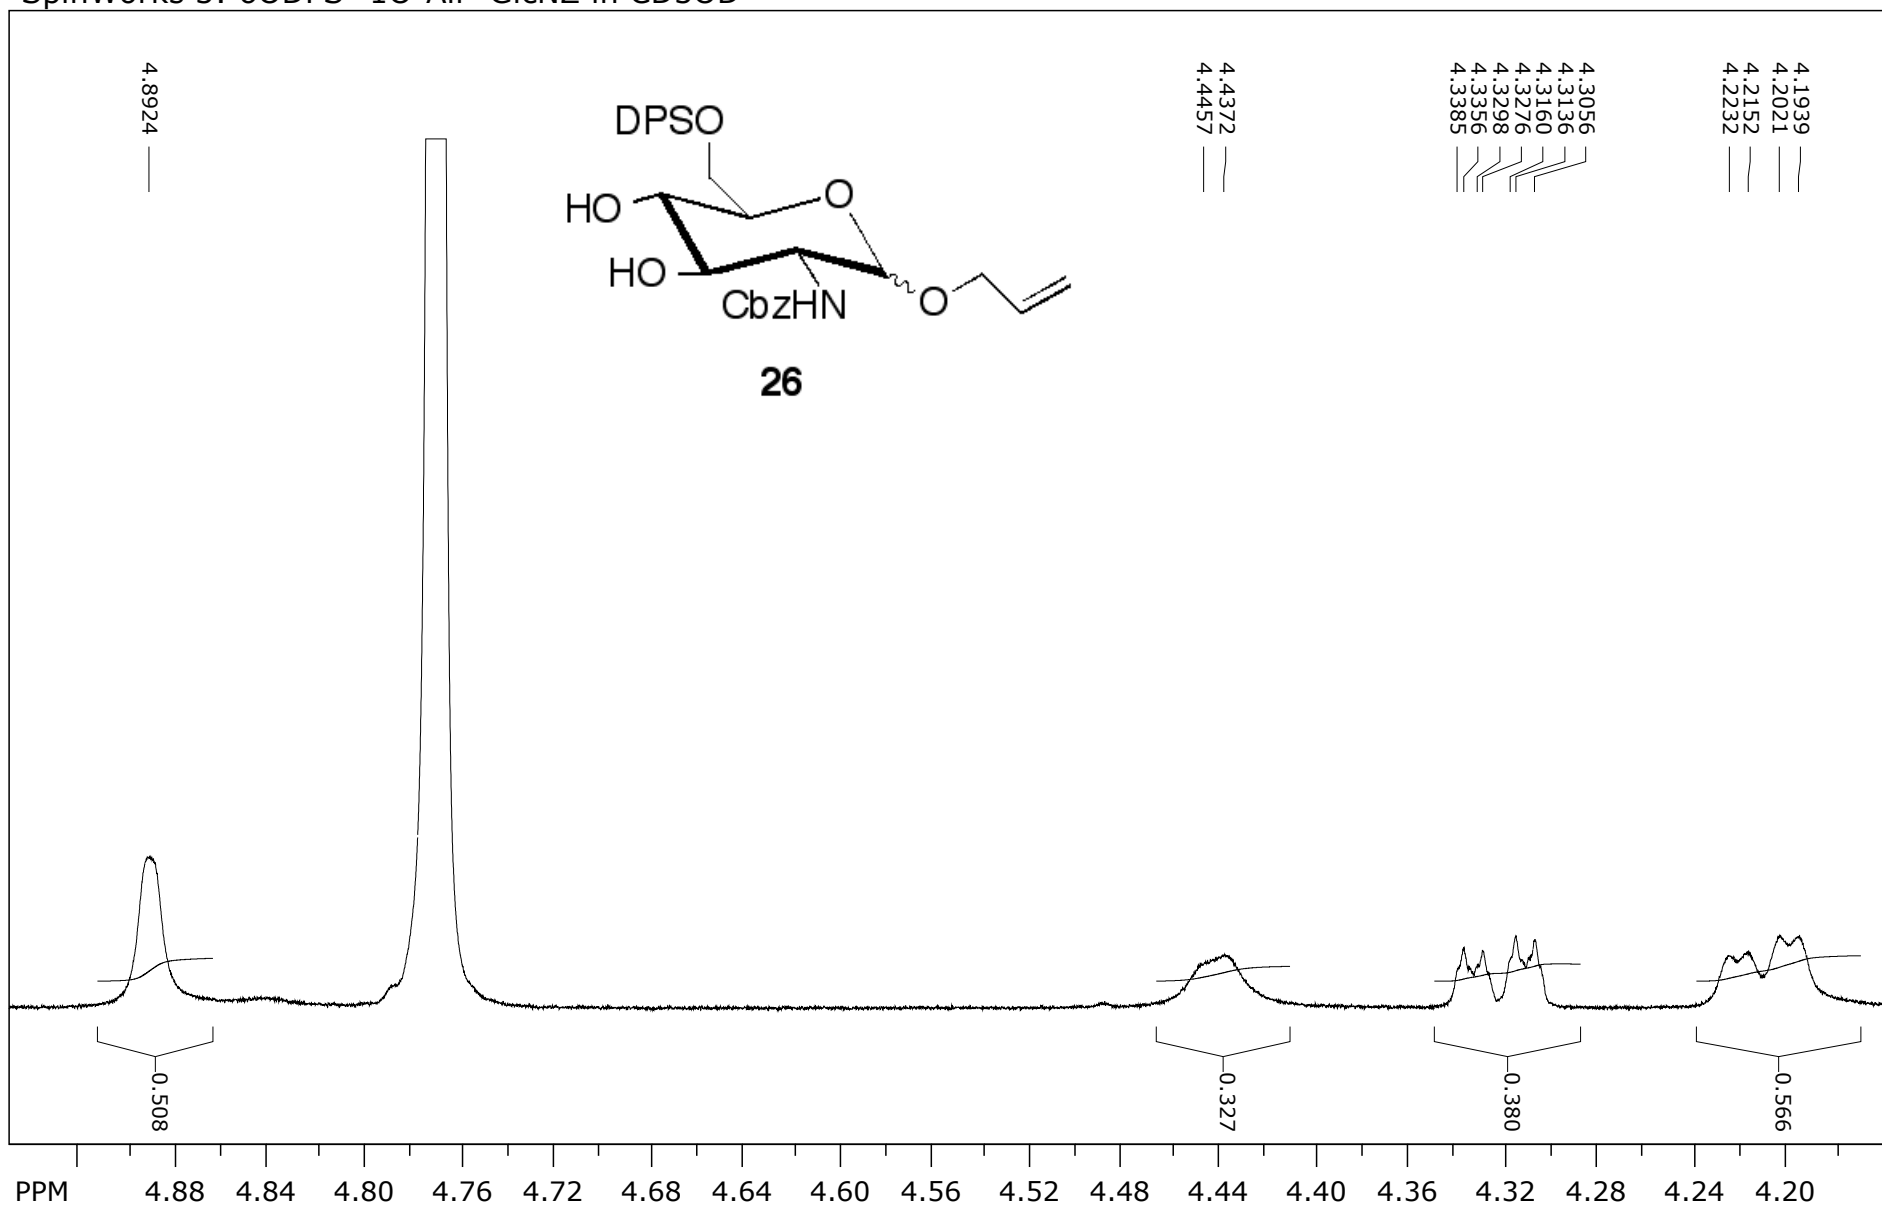

file: ...der\NMR Data\6DPS34OH2\_CD3OD\1\fid exp: <zgr>  
transmitter freq.: 600.553538 MHz  
time domain size: 65536 points  
width: 7211.54 Hz = 12.0082 ppm = 0.110039 Hz/pt  
number of scans: 32

freq. of 0 ppm: 600.550010 MHz  
processed size: 262144 complex points  
LB: 0.000 GF: 0.0000  
Hz/cm: 19.144 ppm/cm: 0.03188

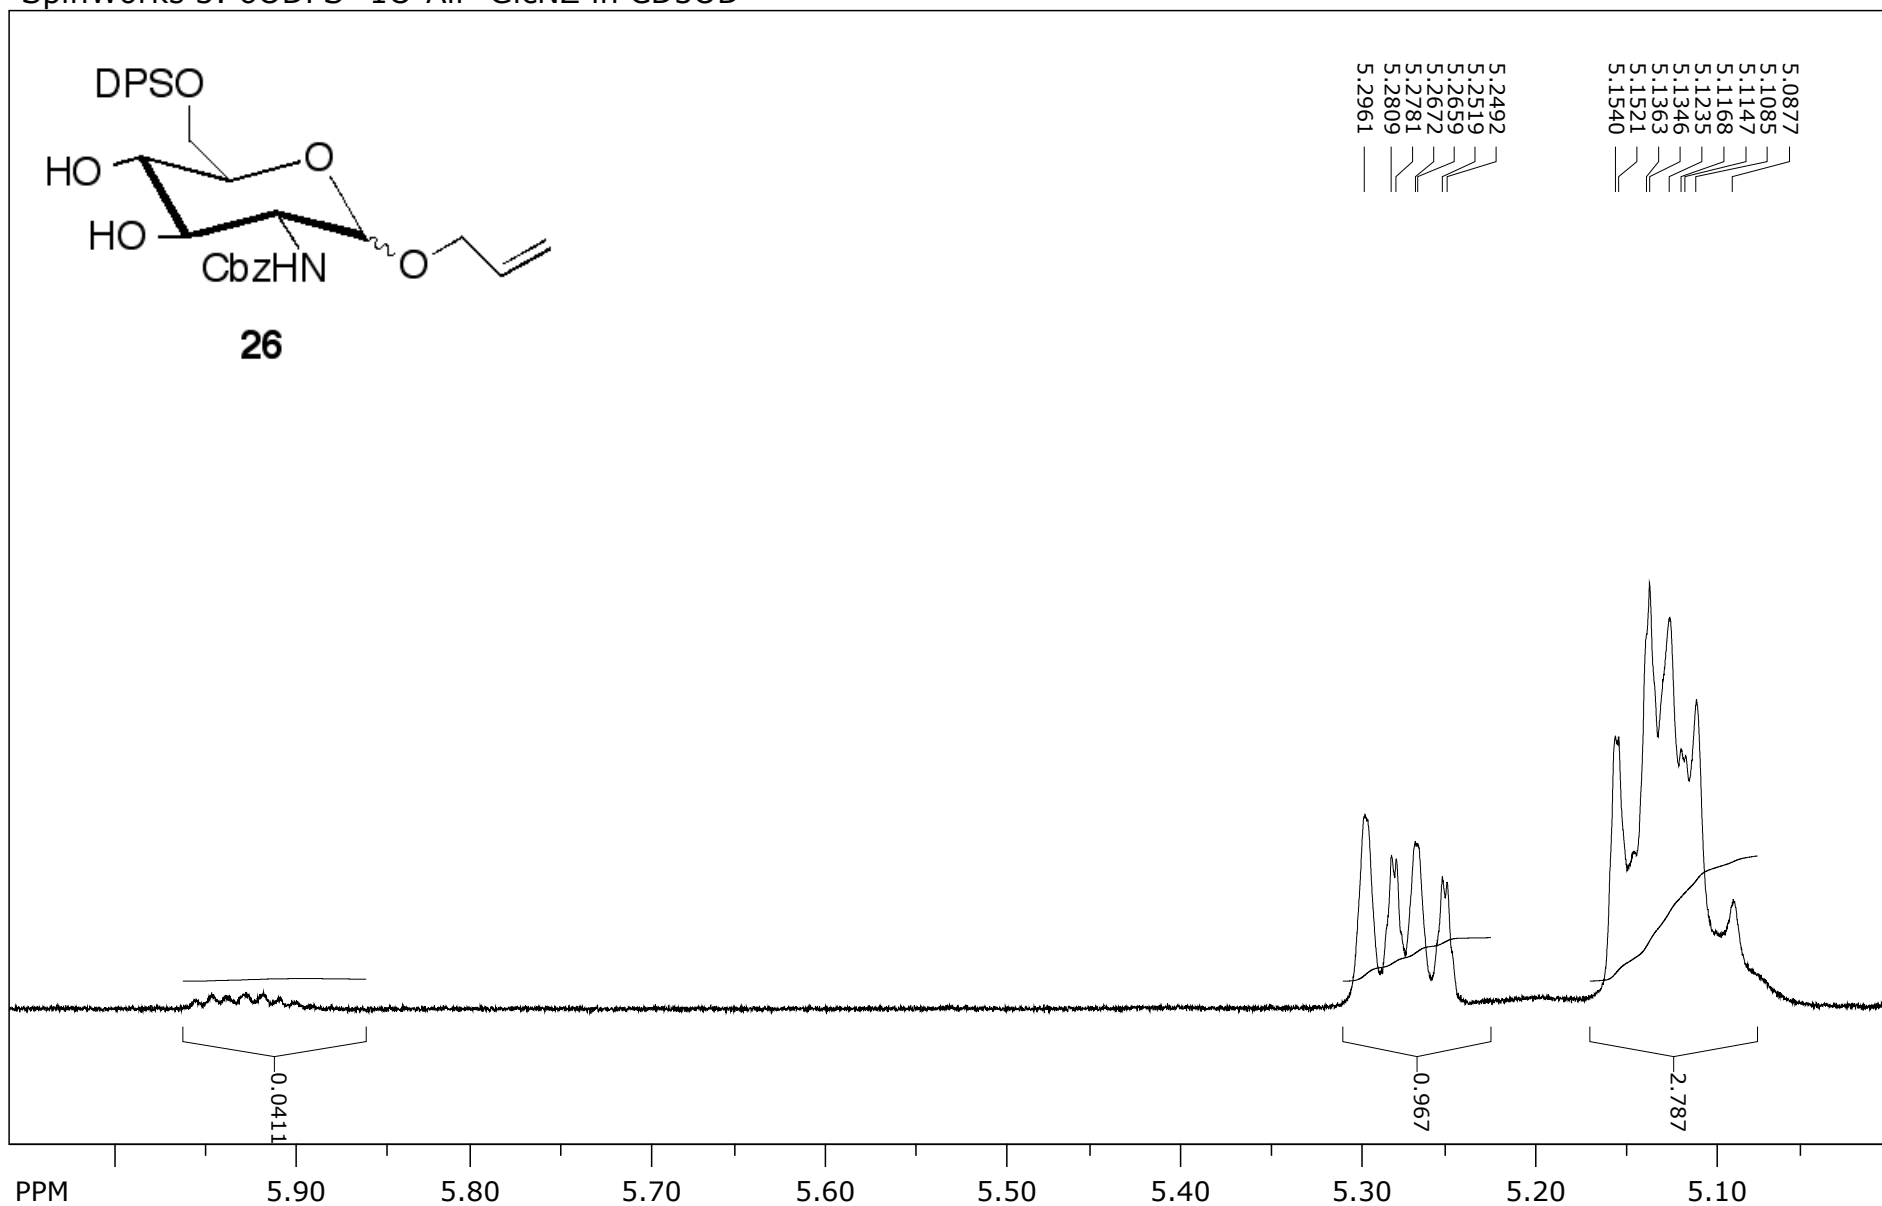

file: ...der\NMR Data\6DPS34OH2\_CD3OD\1\fid exp: <zgpr>  
 transmitter freq.: 600.553538 MHz  
 time domain size: 65536 points  
 width: 7211.54 Hz = 12.0082 ppm = 0.110039 Hz/pt  
 number of scans: 32

freq. of 0 ppm: 600.550010 MHz  
 processed size: 262144 complex points  
 LB: 0.000 GF: 0.0000  
 Hz/cm: 25.595 ppm/cm: 0.04262

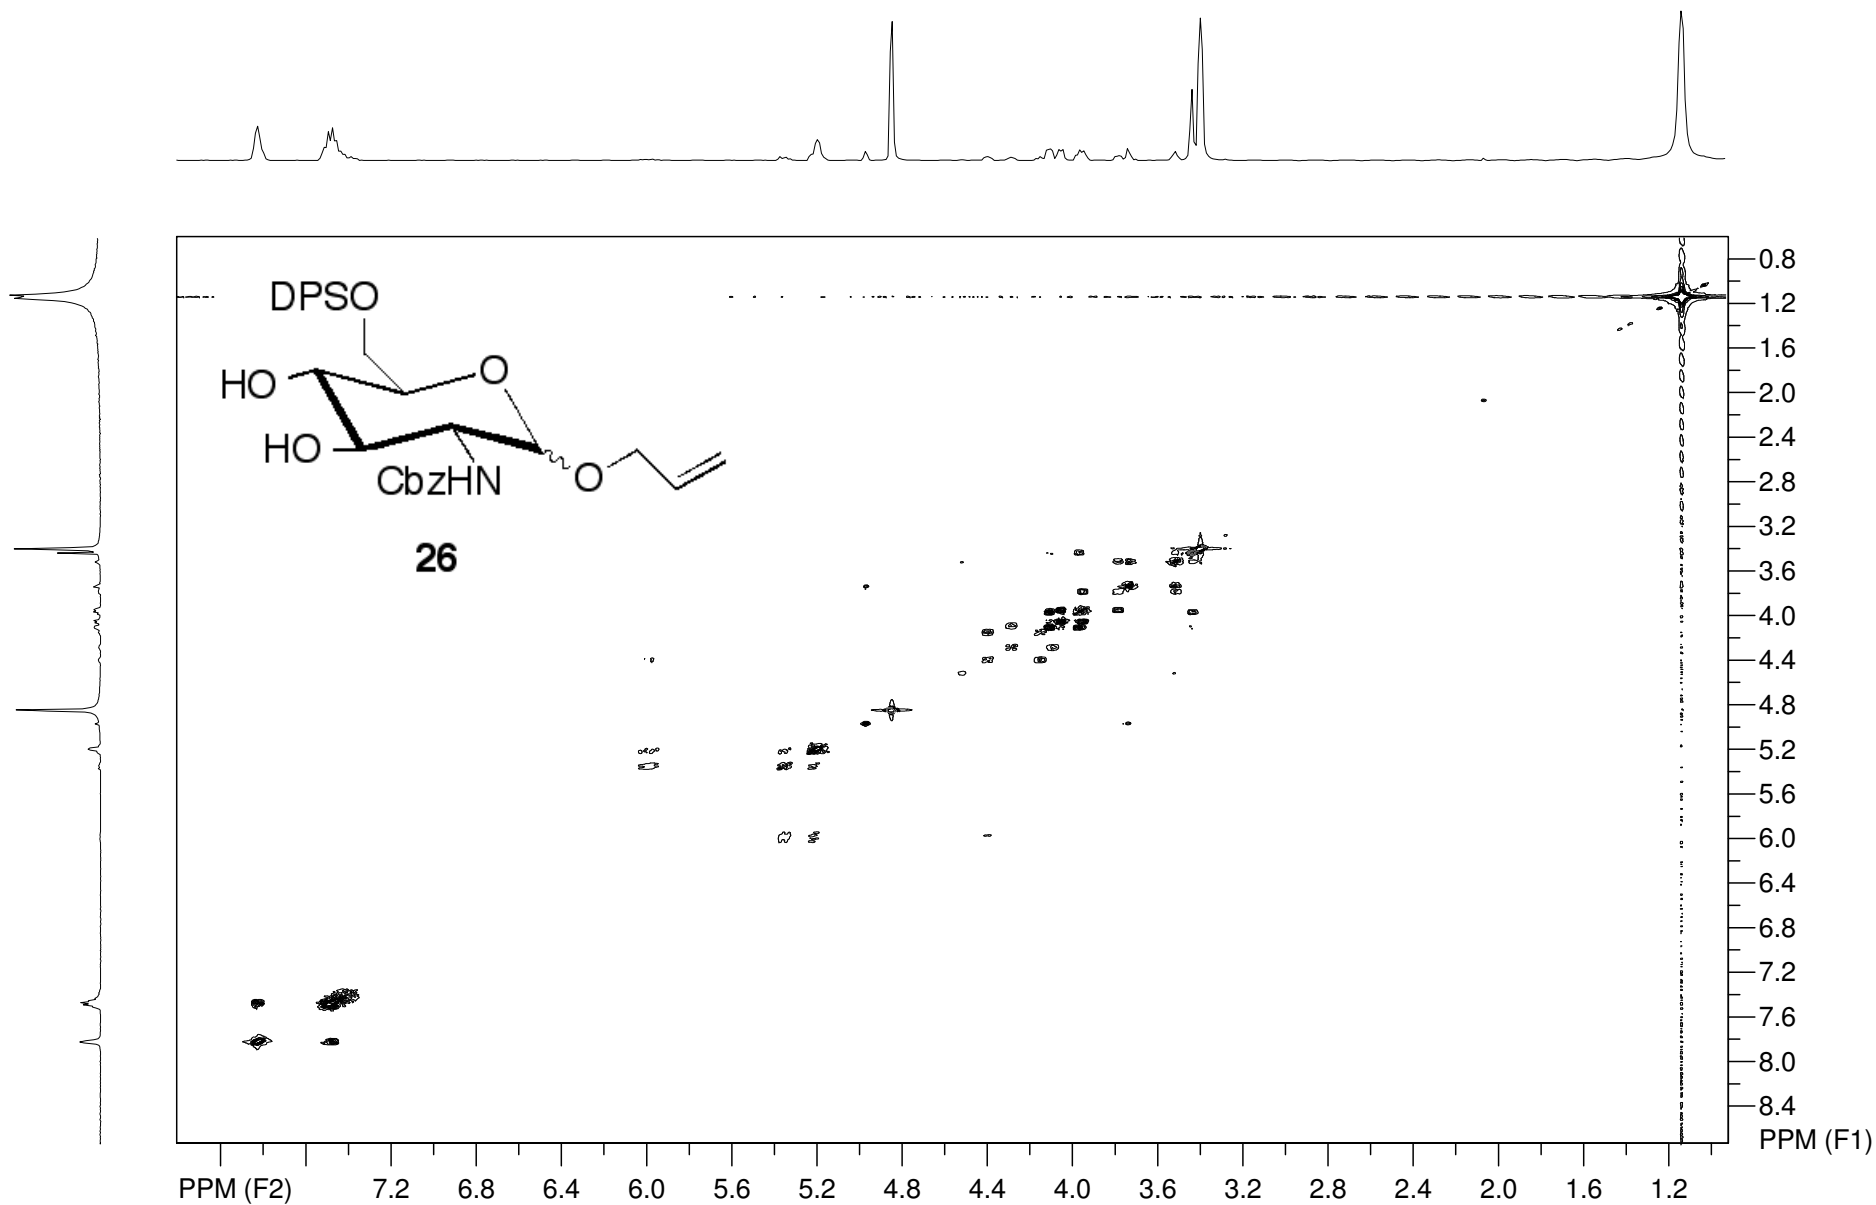

file: C:\Users\Jeff\Documents\NMR Folder\NMR Data\6DPS34OH2\_CD3OD\_COSY\1\ser  
 transmitter freq.: 600.552832 MHz  
 time domain size: 2048 by 2048 points  
 width (F2): 6009.59 Hz = 10.006806 ppm = 2.934368 Hz/pt  
 number of scans: 2

expt: <cosF2>xfreq. of 0 ppm: 600.549962 MHz  
 processed size: 1024 complex points  
 window function: Sine  
 shift: 0.0 degrees  
 Hz/cm: 213.453 ppm/cm: 0.35543

F1: freq. of 0 ppm: 600.549962 MHz  
 processed size: 1024 complex points  
 window function: Sine  
 shift: 0.0 degrees  
 Hz/cm: 407.020 ppm/cm: 0.67774

## S-2NZ-glucopyranoside in CD3OD

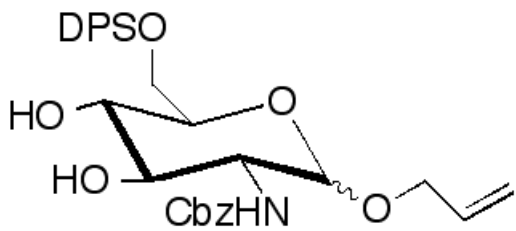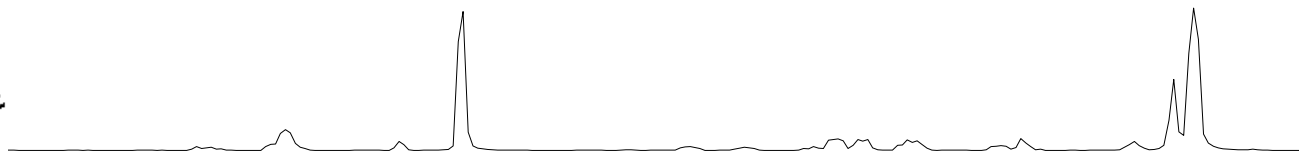

26

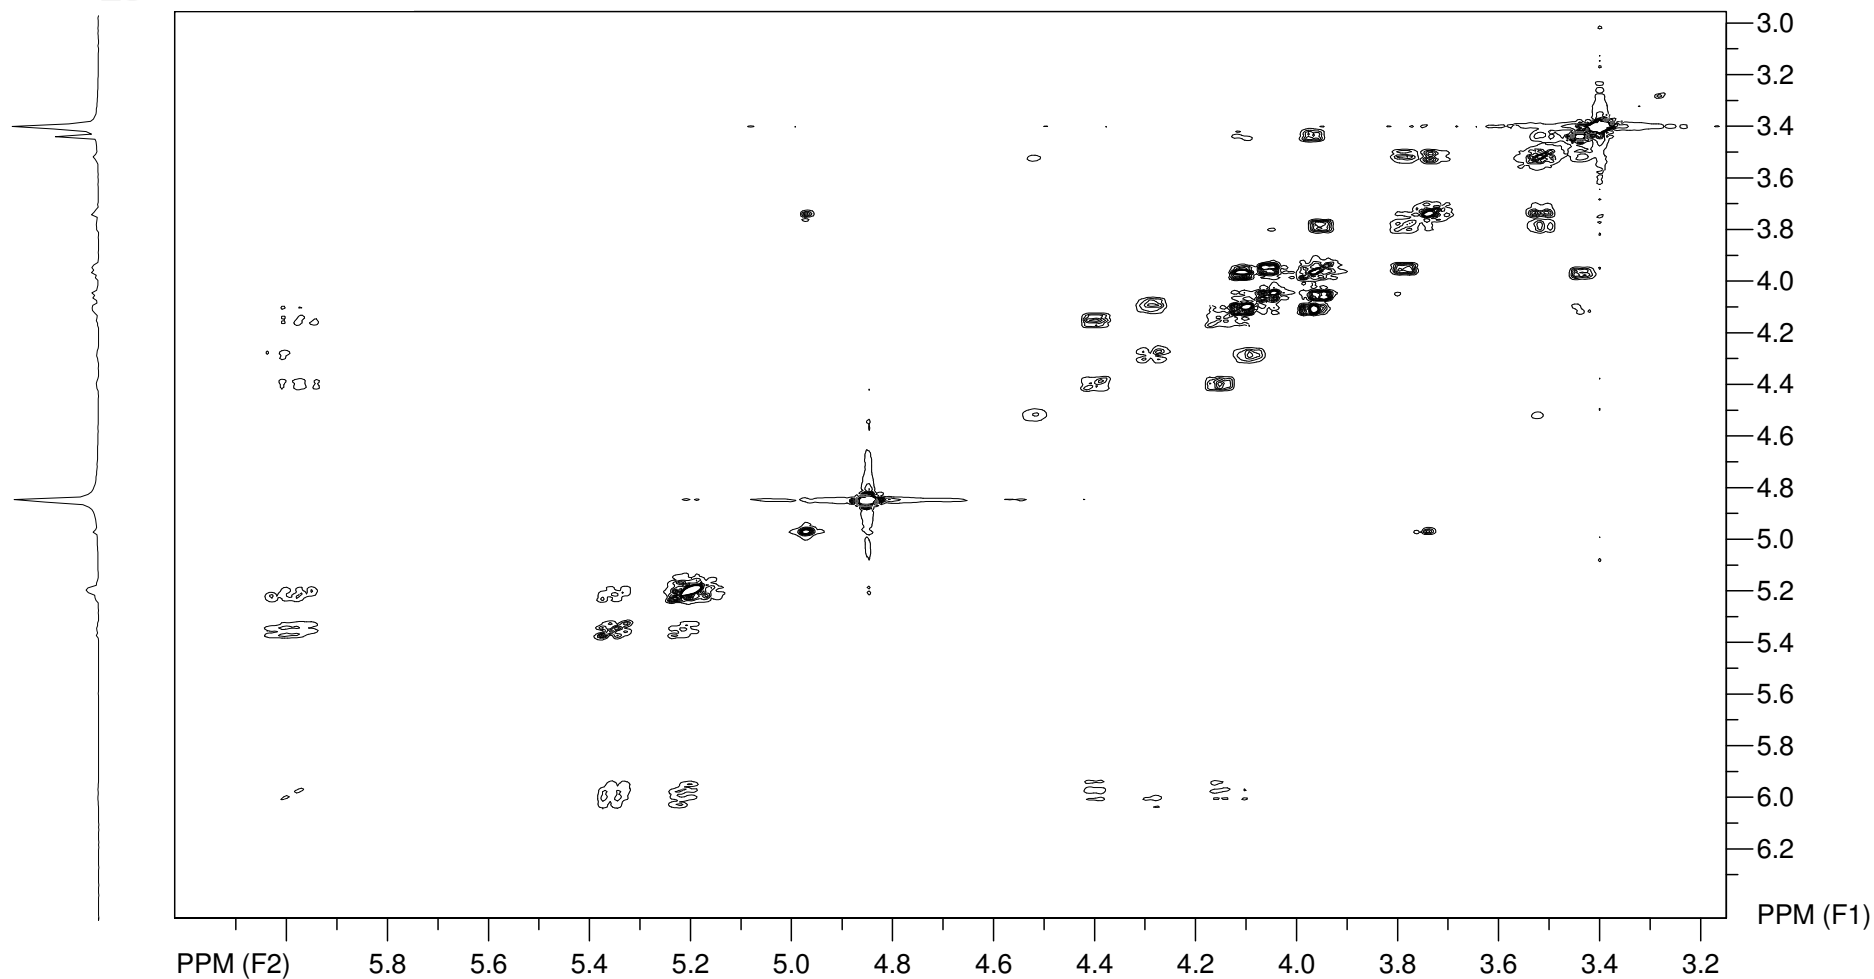

file: C:\Users\Jeff\Documents\NMR Folder\NMR Data\6DPS34OH2\_CD3OD\_COSY\1\ser  
 transmitter freq.: 600.552832 MHz  
 time domain size: 2048 by 2048 points  
 width (F2): 6009.59 Hz = 10.006806 ppm = 2.934368 Hz/pt  
 number of scans: 2

expt: <cosF2>:freq. of 0 ppm: 600.549962 MHz  
 processed size: 1024 complex points  
 window function: Sine  
 shift: 0.0 degrees  
 Hz/cm: 90.002 ppm/cm: 0.14987

F1: freq. of 0 ppm: 600.549962 MHz  
 processed size: 1024 complex points  
 window function: Sine  
 shift: 0.0 degrees  
 Hz/cm: 175.817 ppm/cm: 0.29276



$\alpha$ -2NZ-glucopyranoside in CD3OD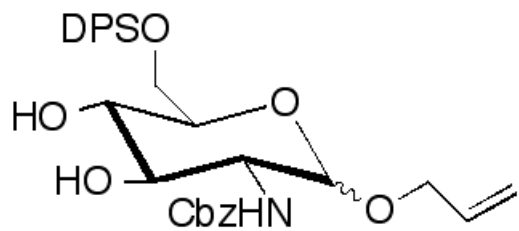

26

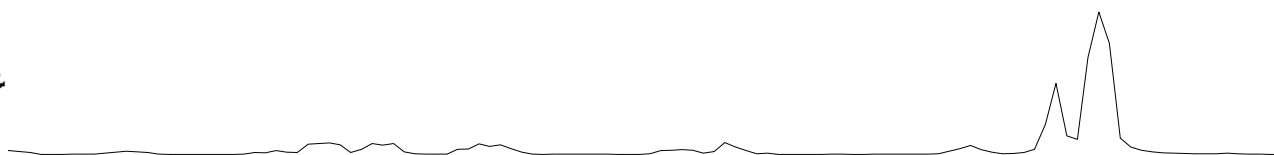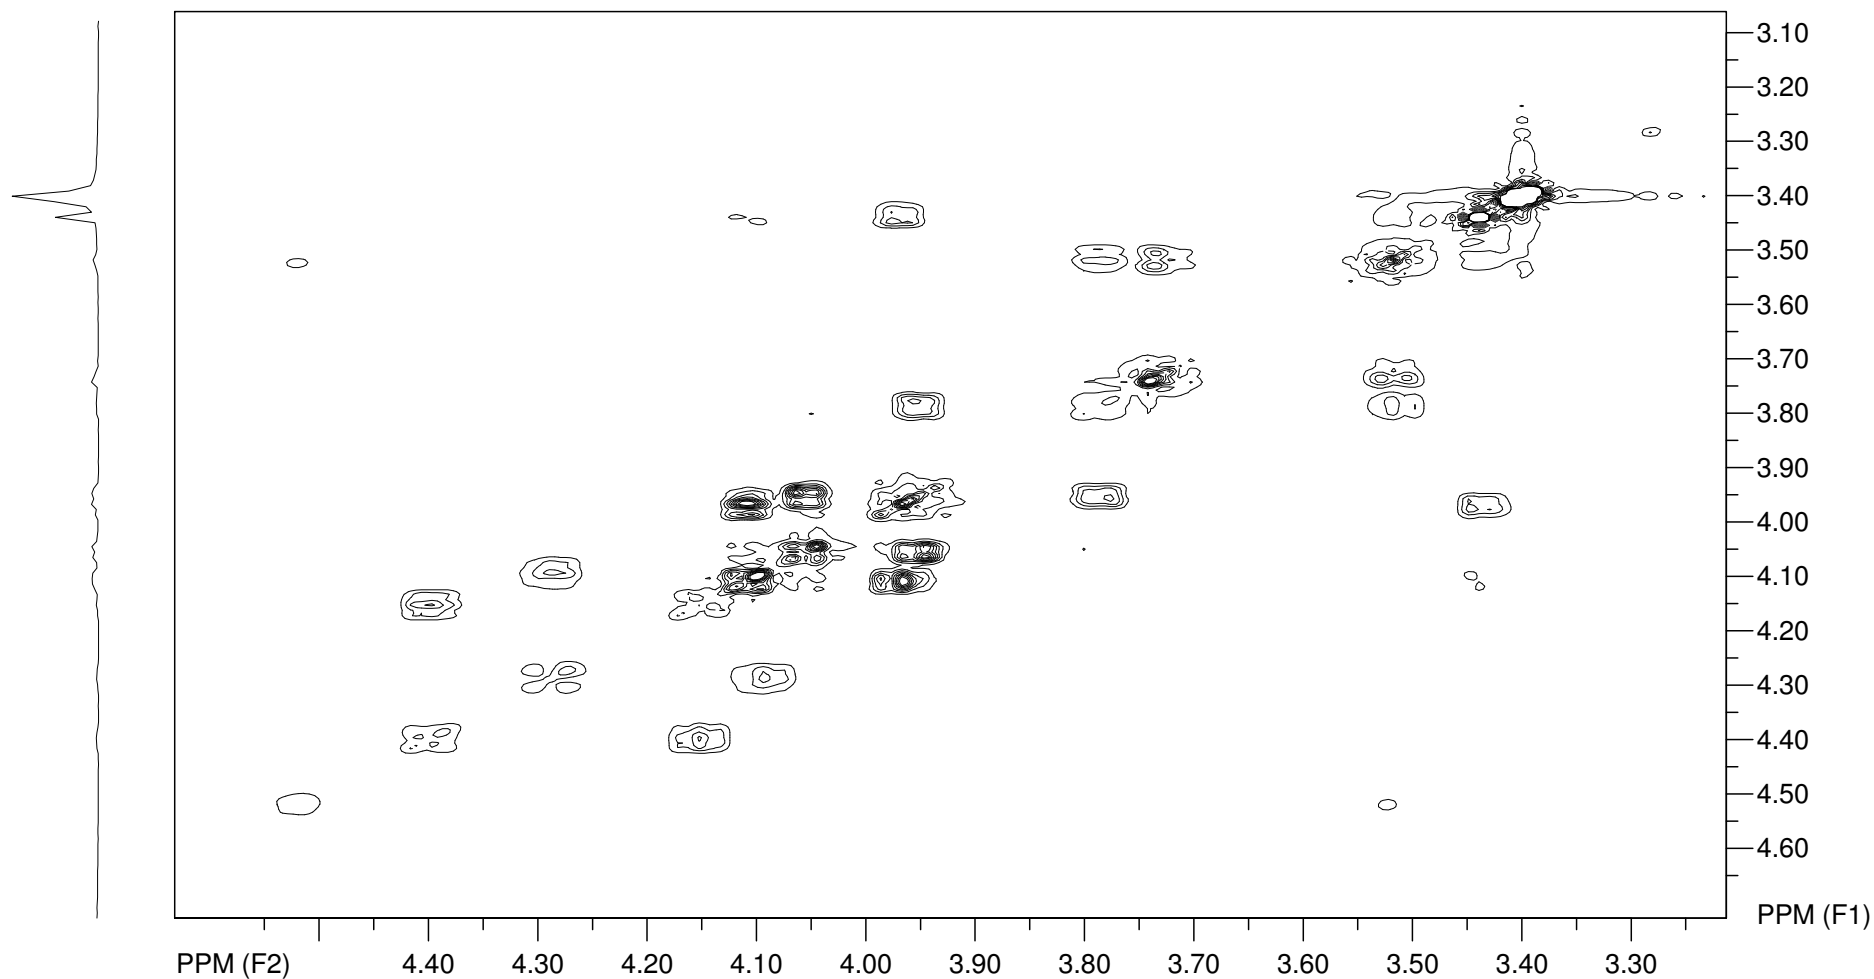

file: C:\Users\Jeff\Documents\NMR Folder\NMR Data\6DPS34OH2\_CD3OD\_COSY\1\ser exp: <cosF2>:freq. of 0 ppm: 600.549962 MHz  
 transmitter freq.: 600.552832 MHz  
 time domain size: 2048 by 2048 points  
 width (F2): 6009.59 Hz = 10.006806 ppm = 2.934368 Hz/pt  
 number of scans: 2

processed size: 1024 complex points  
 window function: Sine  
 shift: 0.0 degrees  
 Hz/cm: 41.574 ppm/cm: 0.06923

F1: freq. of 0 ppm: 600.549962 MHz  
 processed size: 1024 complex points  
 window function: Sine  
 shift: 0.0 degrees  
 Hz/cm: 83.458 ppm/cm: 0.13897

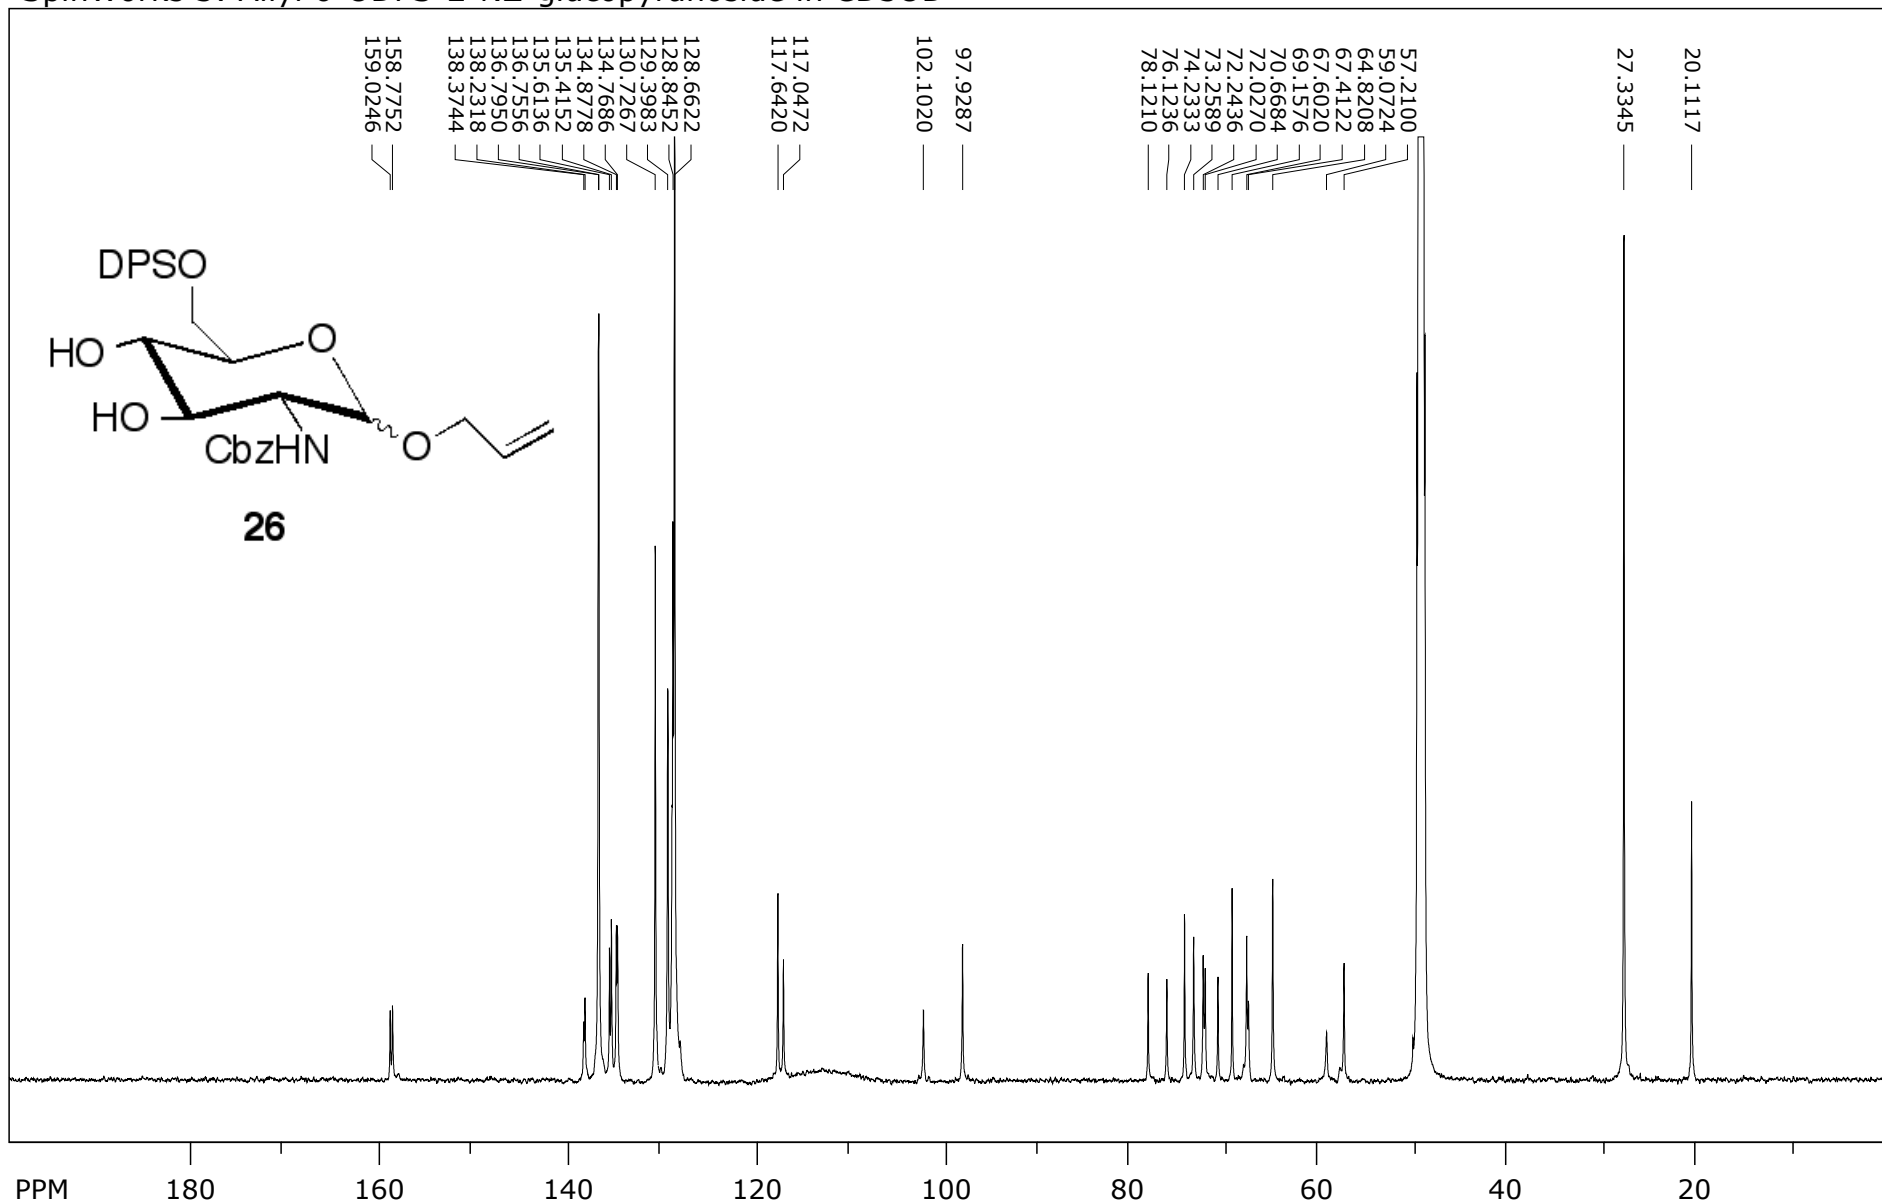

file: ...ta\6DPS2NZ1All\_CD3ODrepur13C\1\fid expt: <zgpg30>  
transmitter freq.: 151.023519 MHz  
time domain size: 65536 points  
width: 36057.69 Hz = 238.7555 ppm = 0.550197 Hz/pt  
number of scans: 20480

freq. of 0 ppm: 151.008215 MHz  
processed size: 32768 complex points  
LB: 10.000 GF: 0.0000  
Hz/cm: 1213.511 ppm/cm: 8.03525

|               |                      |             |                      |                 |              |                        |                      |
|---------------|----------------------|-------------|----------------------|-----------------|--------------|------------------------|----------------------|
| Sample Name   | Jeff 47              | Position    | Vial 47              | Instrument Name | Instrument 1 | User Name              | DYL                  |
| Inj Vol       | 1                    | InjPosition |                      | SampleType      | Unknown      | IRM Calibration Status | Success              |
| Data Filename | Direct_Vial_47_Jeff. | ACQ Method  | Direct_small mol_Jef | Comment         |              | Acquired Time          | 8/17/2012 2:15:15 PM |

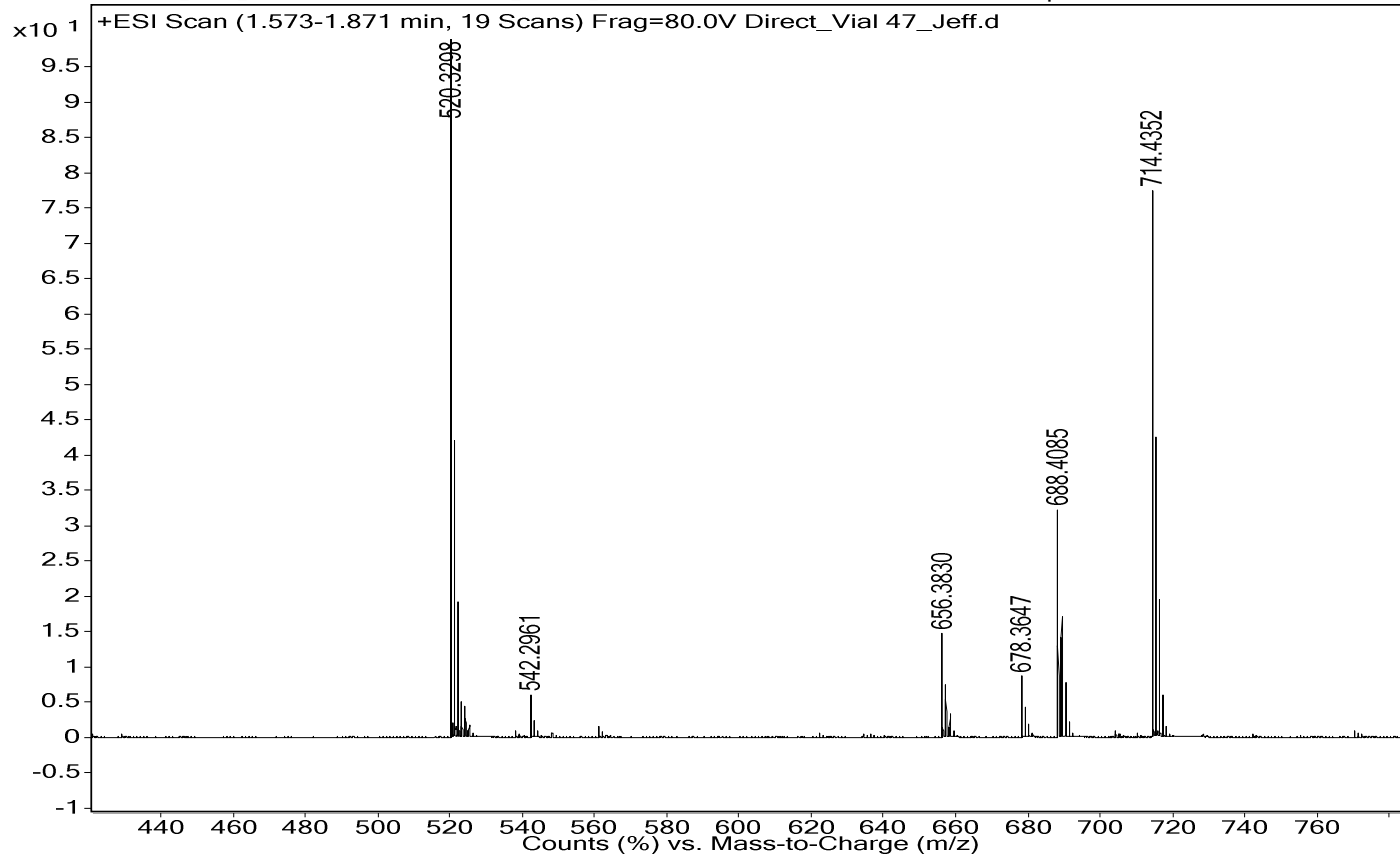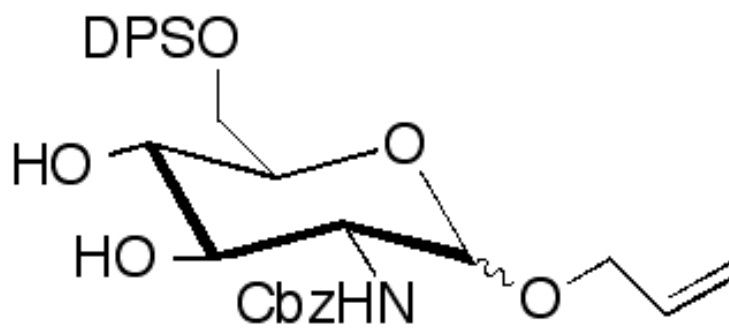

26

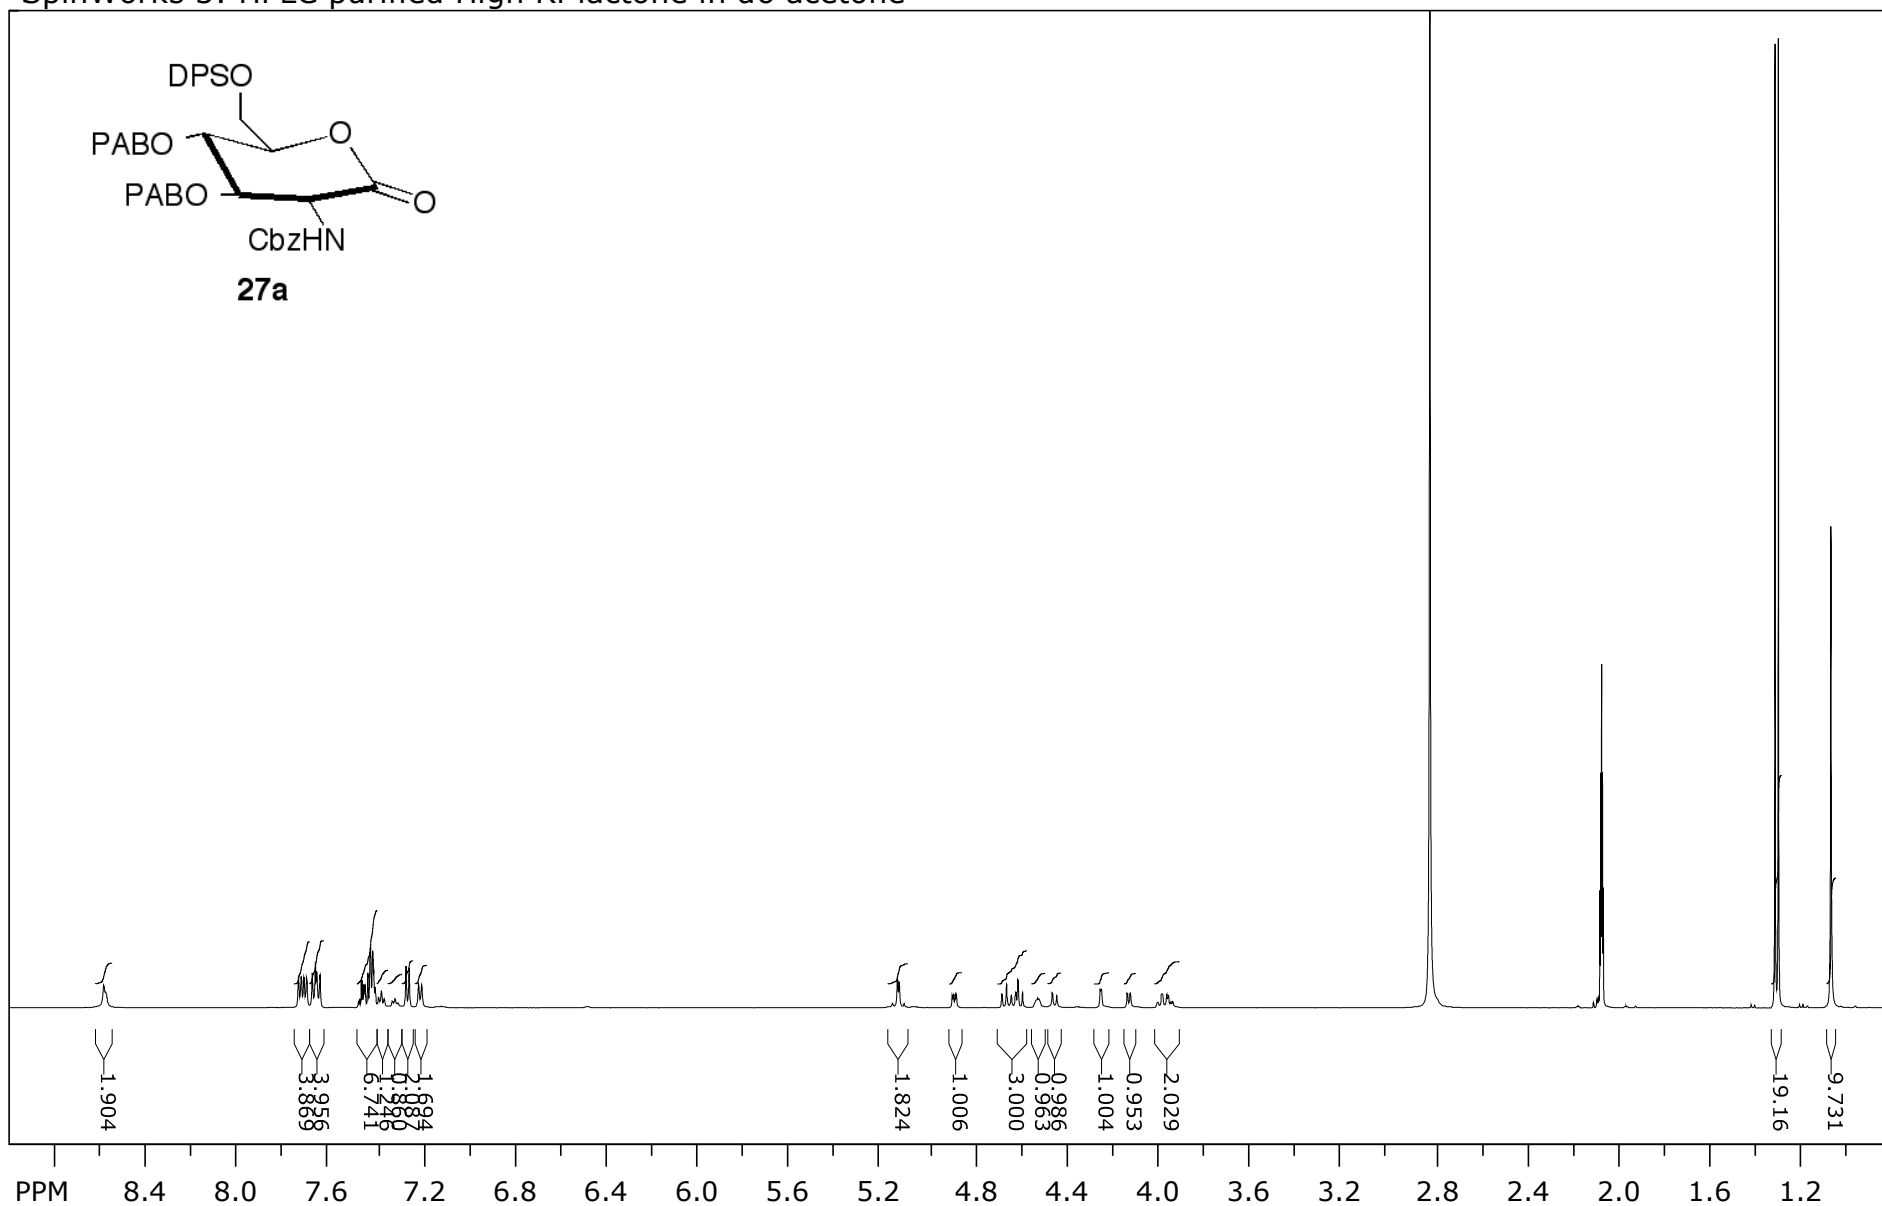

file: ...MR Data\HiRfLactone\HPLCPur\_1H\fid exp: <zgpr>  
transmitter freq.: 600.553538 MHz  
time domain size: 65536 points  
width: 8417.51 Hz = 14.0162 ppm = 0.128441 Hz/pt  
number of scans: 32

freq. of 0 ppm: 600.550010 MHz  
processed size: 262144 complex points  
LB: 0.000 GF: 0.0000  
Hz/cm: 197.351 ppm/cm: 0.32861

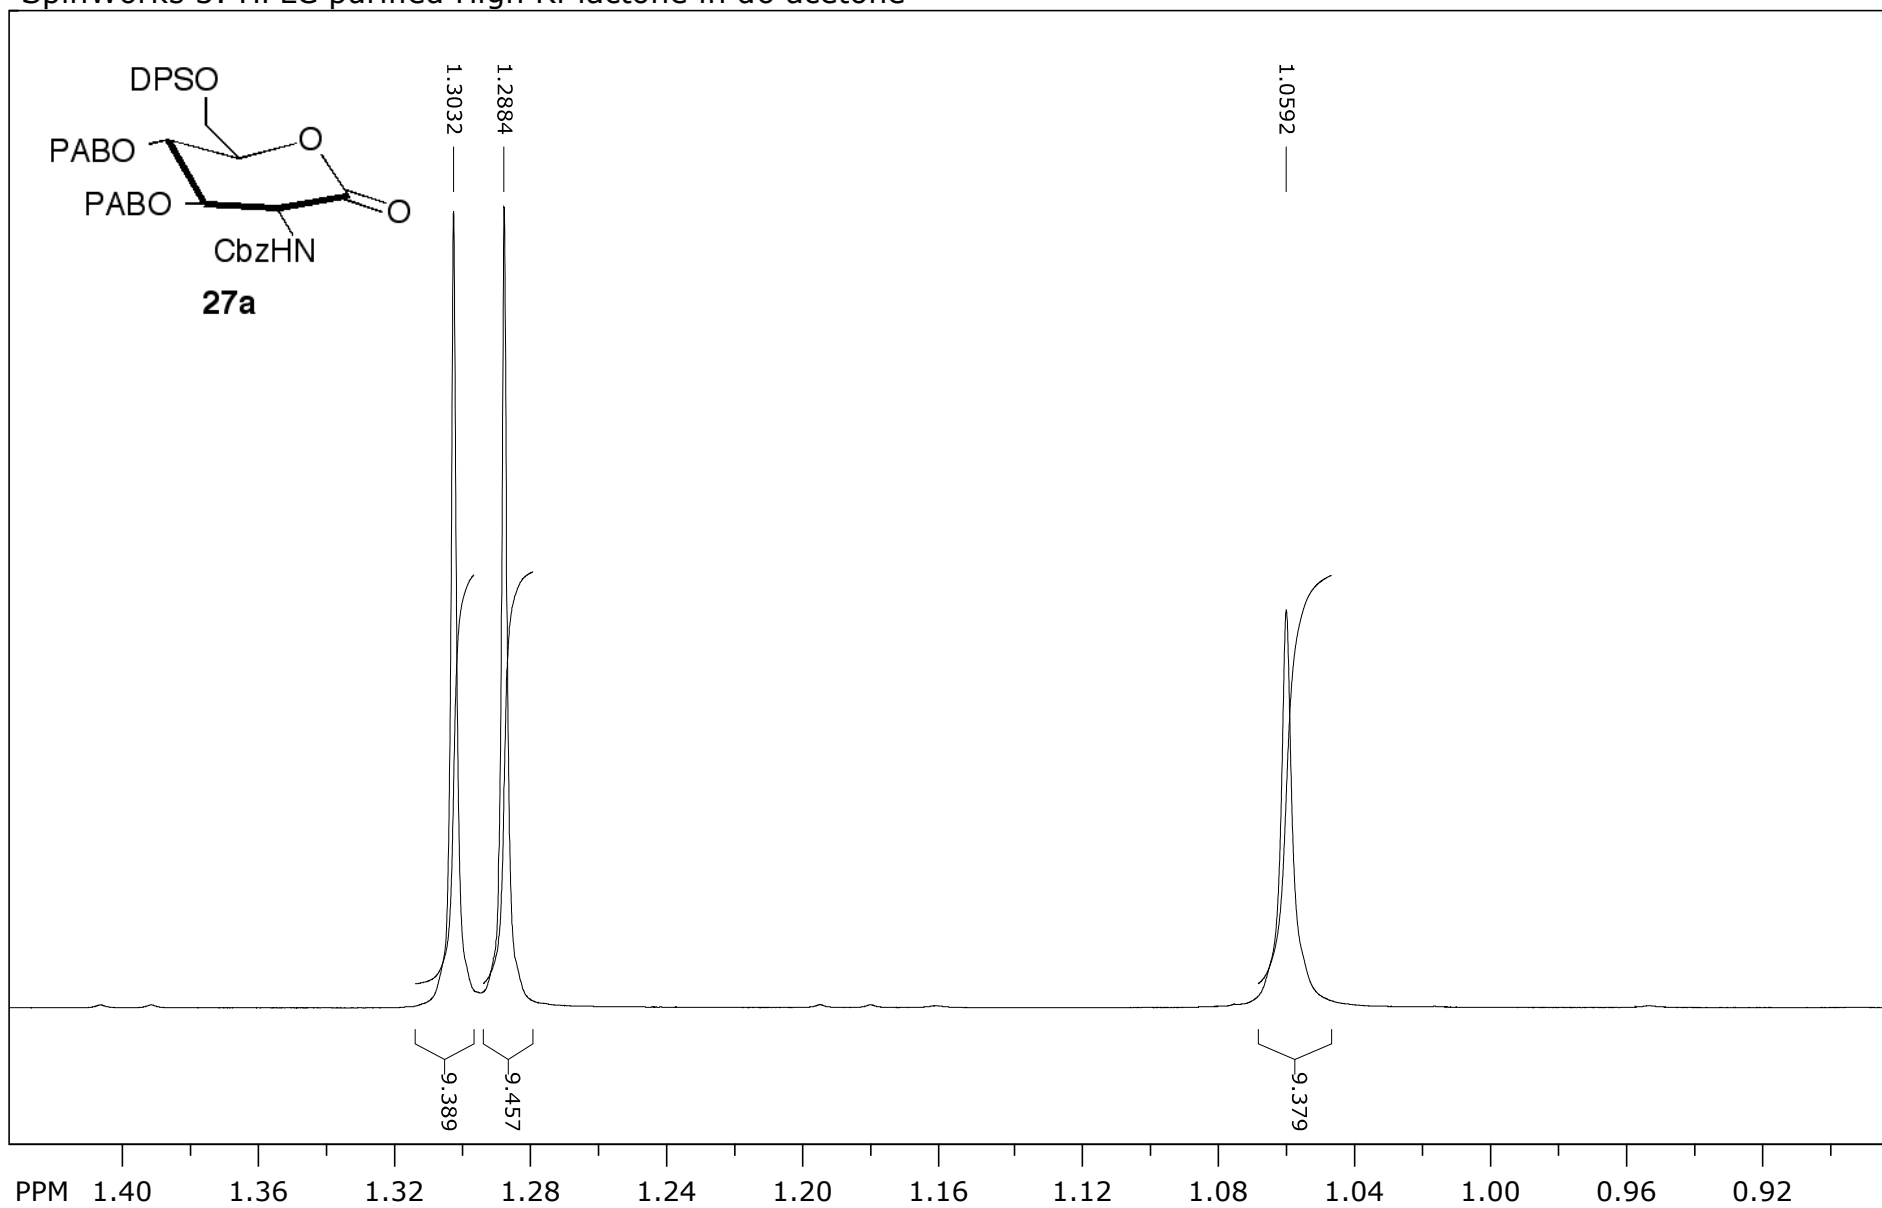

file: ...MR Data\HiRfLactone\HPLCPur\_1H\fid exp: <zgpr>  
transmitter freq.: 600.553538 MHz  
time domain size: 65536 points  
width: 8417.51 Hz = 14.0162 ppm = 0.128441 Hz/pt  
number of scans: 32

freq. of 0 ppm: 600.550010 MHz  
processed size: 262144 complex points  
LB: 0.000 GF: 0.0000  
Hz/cm: 13.251 ppm/cm: 0.02206

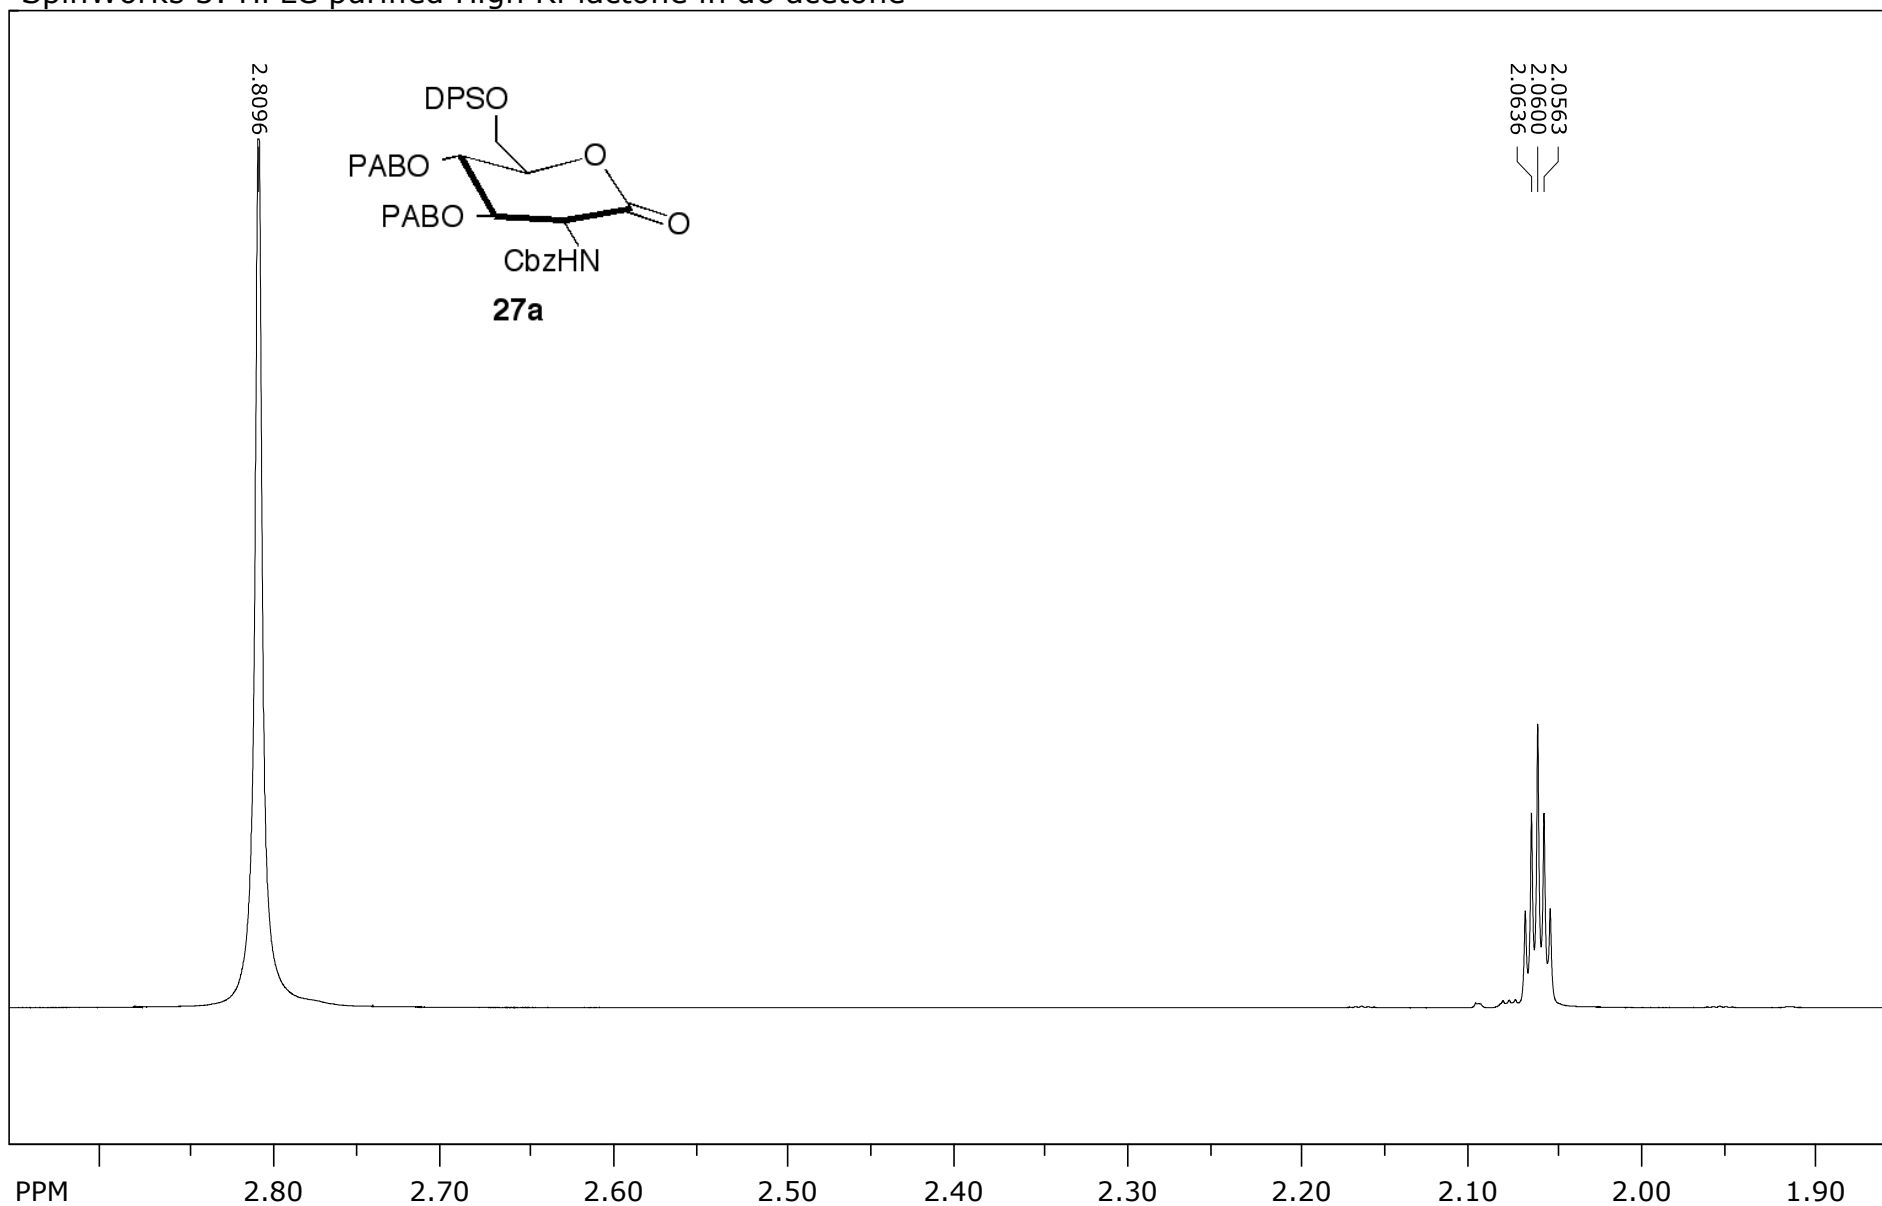

file: ...MR Data\HiRfLactone\HPLCPur\_1H\fid expt: <zgpr>  
transmitter freq.: 600.553538 MHz  
time domain size: 65536 points  
width: 8417.51 Hz = 14.0162 ppm = 0.128441 Hz/pt  
number of scans: 32

freq. of 0 ppm: 600.550010 MHz  
processed size: 262144 complex points  
LB: 0.000 GF: 0.0000  
Hz/cm: 26.499 ppm/cm: 0.04412

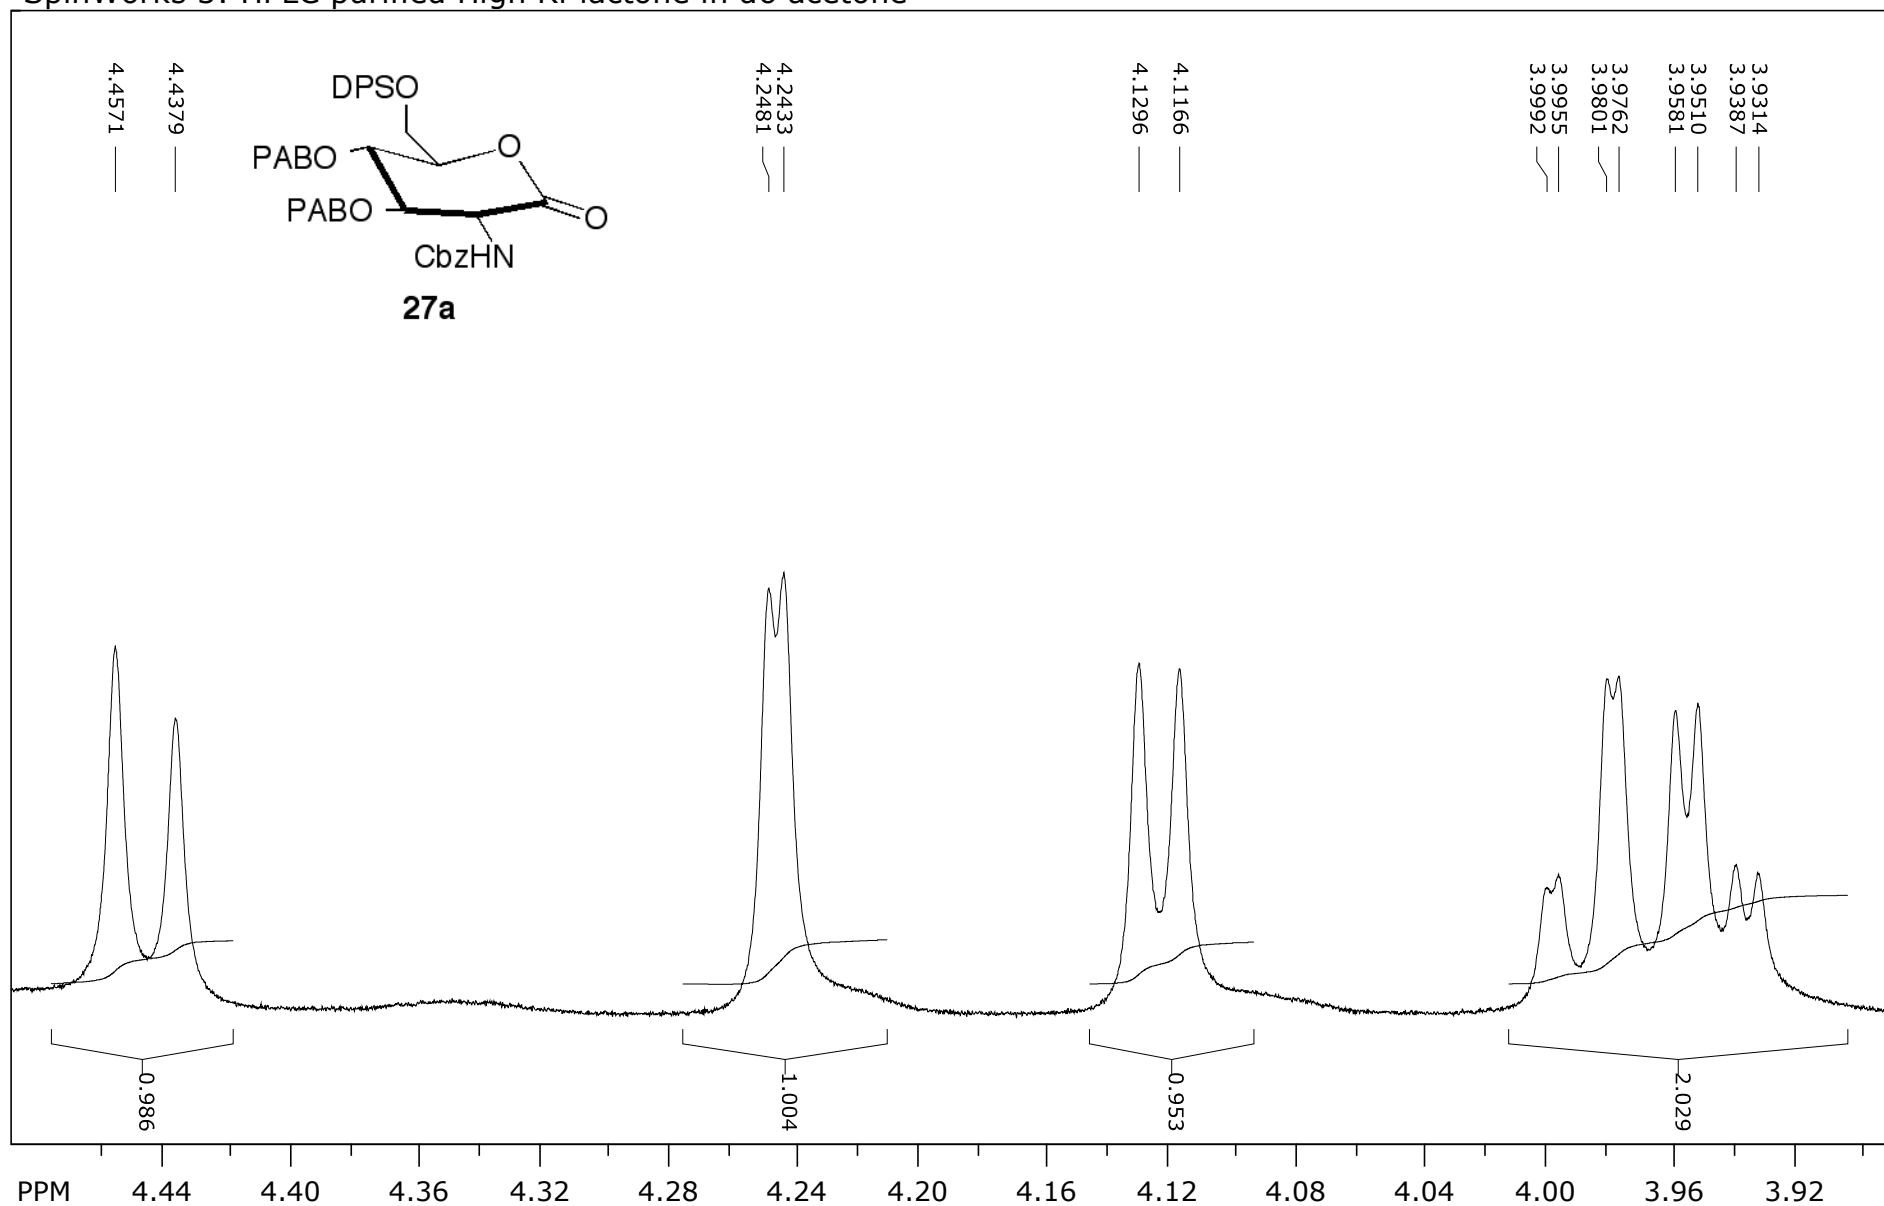

file: ...MR Data\HiRfLactone\HPLCPur\_1H\fid exp: <zgpr>  
transmitter freq.: 600.553538 MHz  
time domain size: 65536 points  
width: 8417.51 Hz = 14.0162 ppm = 0.128441 Hz/pt  
number of scans: 32

freq. of 0 ppm: 600.550010 MHz  
processed size: 262144 complex points  
LB: 0.000 GF: 0.0000  
Hz/cm: 14.460 ppm/cm: 0.02408

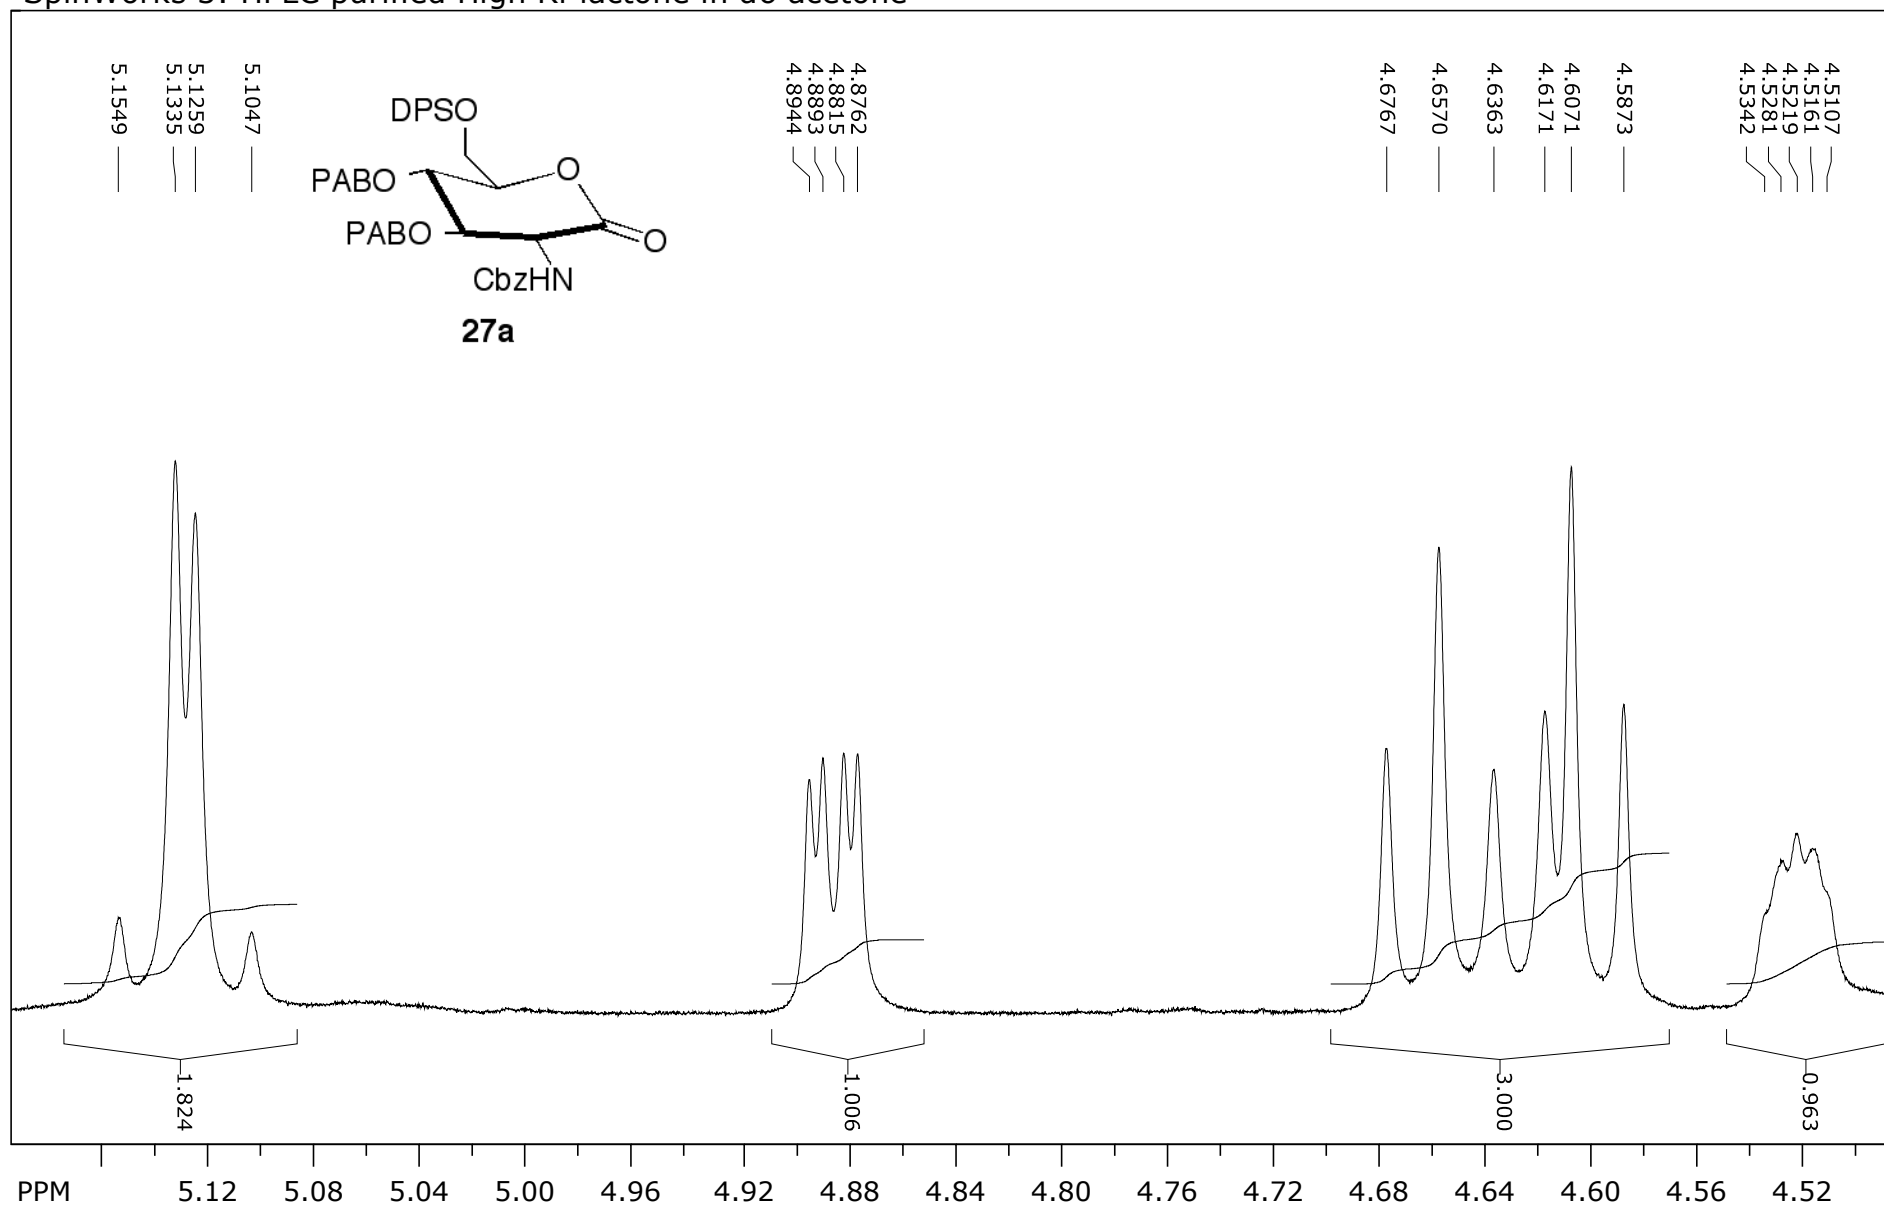

file: ...MR Data\HiRfLactone\HPLCPur\_1H\fid expt: <zgpr>  
transmitter freq.: 600.553538 MHz  
time domain size: 65536 points  
width: 8417.51 Hz = 14.0162 ppm = 0.128441 Hz/pt  
number of scans: 32

freq. of 0 ppm: 600.550010 MHz  
processed size: 262144 complex points  
LB: 0.000 GF: 0.0000  
Hz/cm: 17.047 ppm/cm: 0.02839



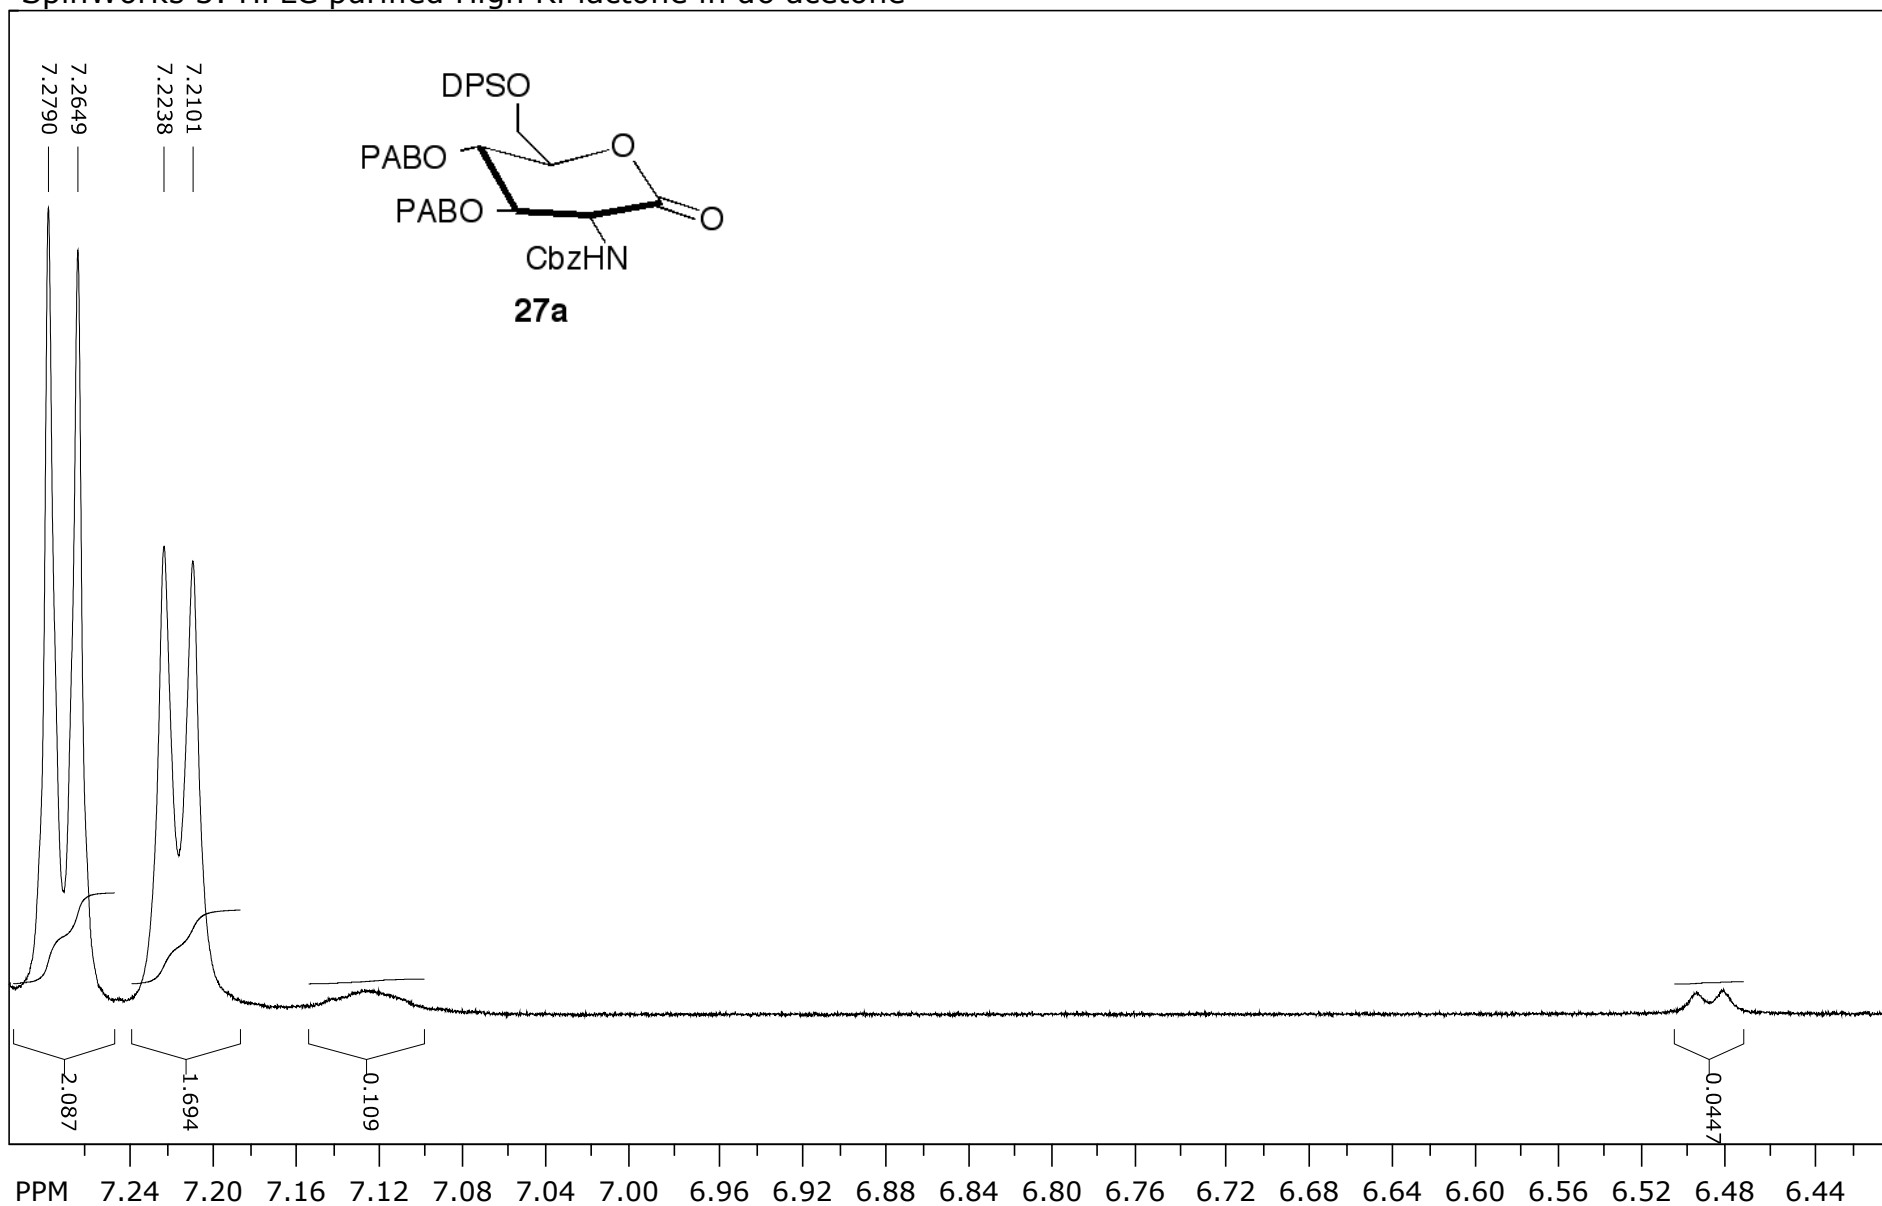

file: ...MR Data\HiRfLactone\HPLCPur\_1H\fid expt: <zgpr>  
transmitter freq.: 600.553538 MHz  
time domain size: 65536 points  
width: 8417.51 Hz = 14.0162 ppm = 0.128441 Hz/pt  
number of scans: 32

freq. of 0 ppm: 600.550010 MHz  
processed size: 262144 complex points  
LB: 0.000 GF: 0.0000  
Hz/cm: 21.548 ppm/cm: 0.03588

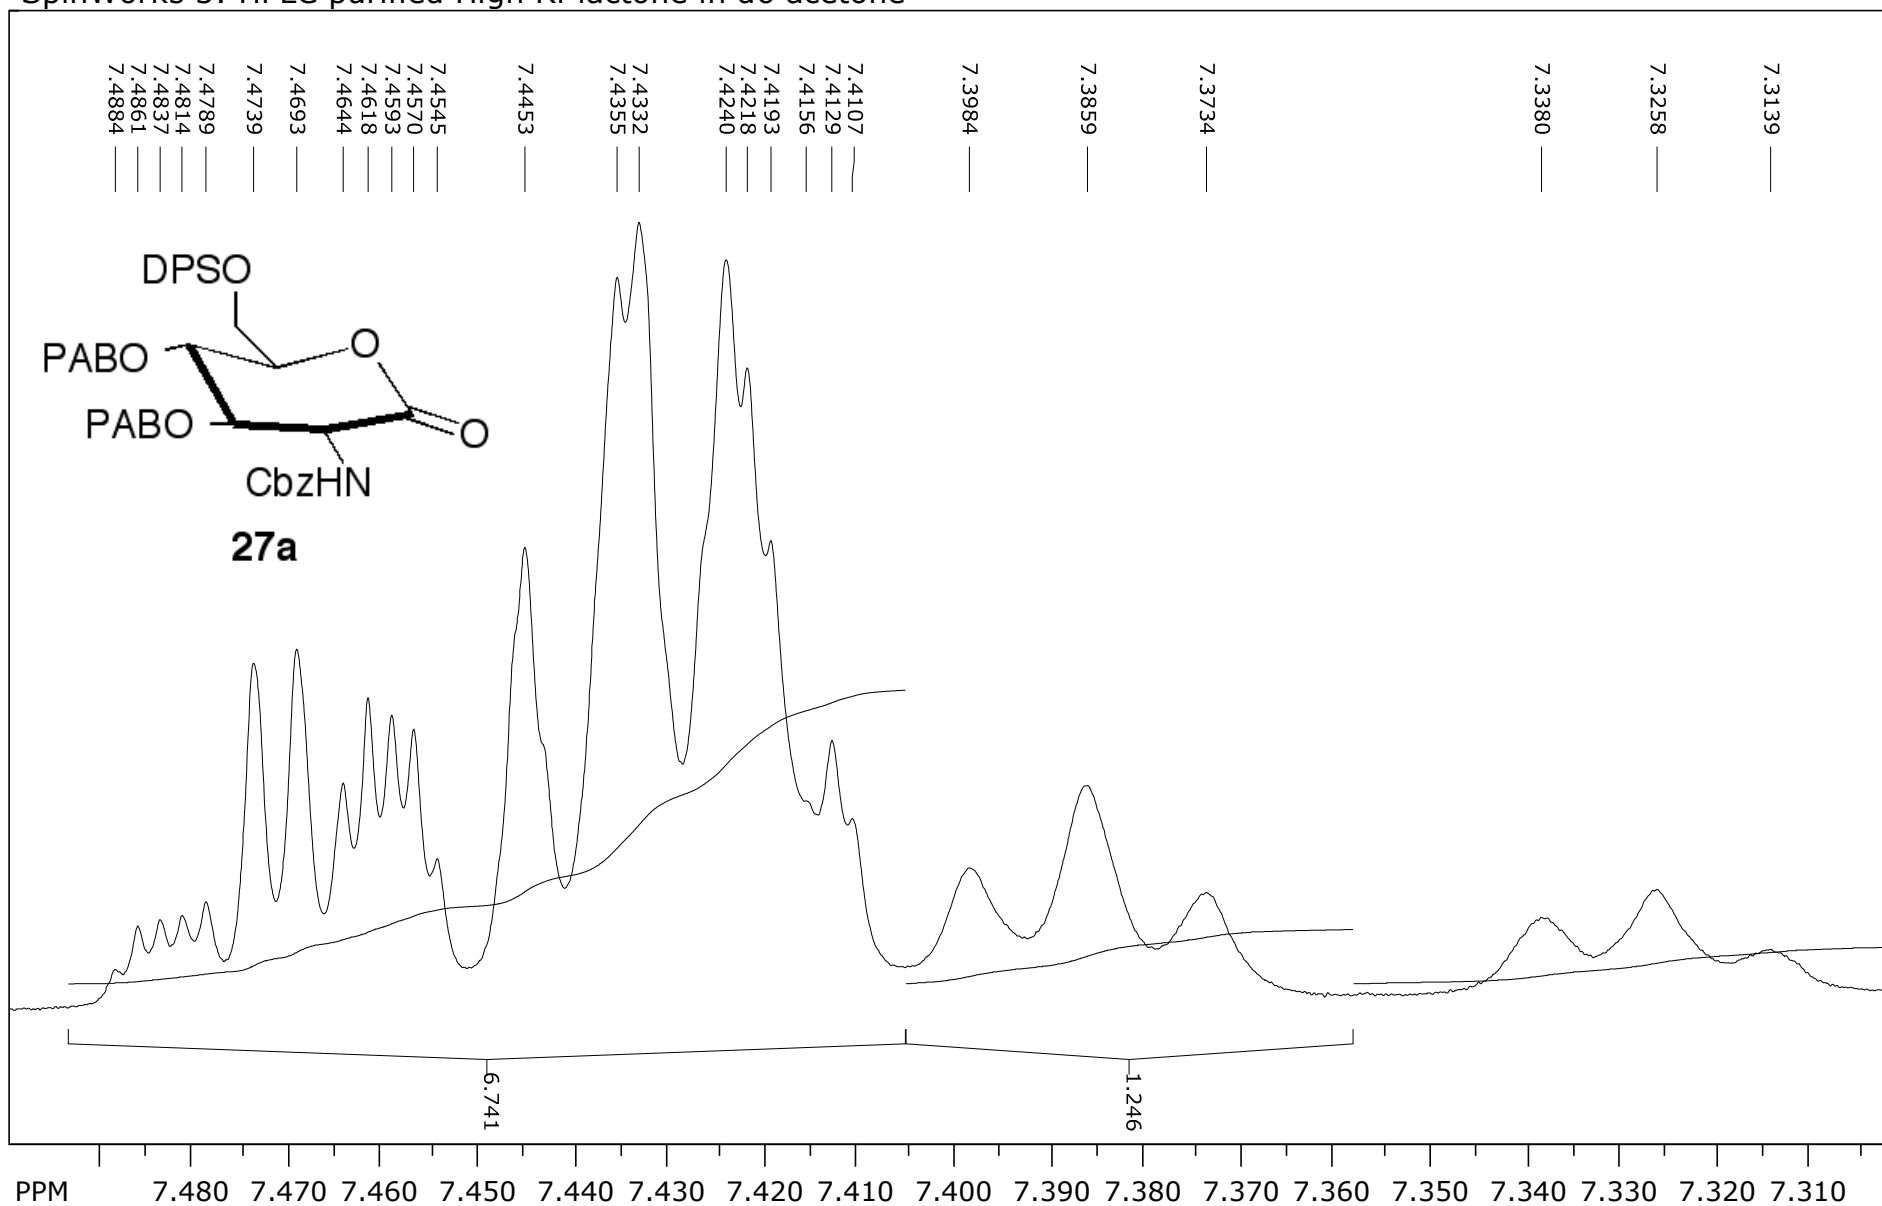

file: ...MR Data\HiRfLactone\HPLCPur\_1H\fid expt: <zgpr>  
transmitter freq.: 600.553538 MHz  
time domain size: 65536 points  
width: 8417.51 Hz = 14.0162 ppm = 0.128441 Hz/pt  
number of scans: 32

freq. of 0 ppm: 600.550010 MHz  
processed size: 262144 complex points  
LB: 0.000 GF: 0.0000  
Hz/cm: 4.768 ppm/cm: 0.00794

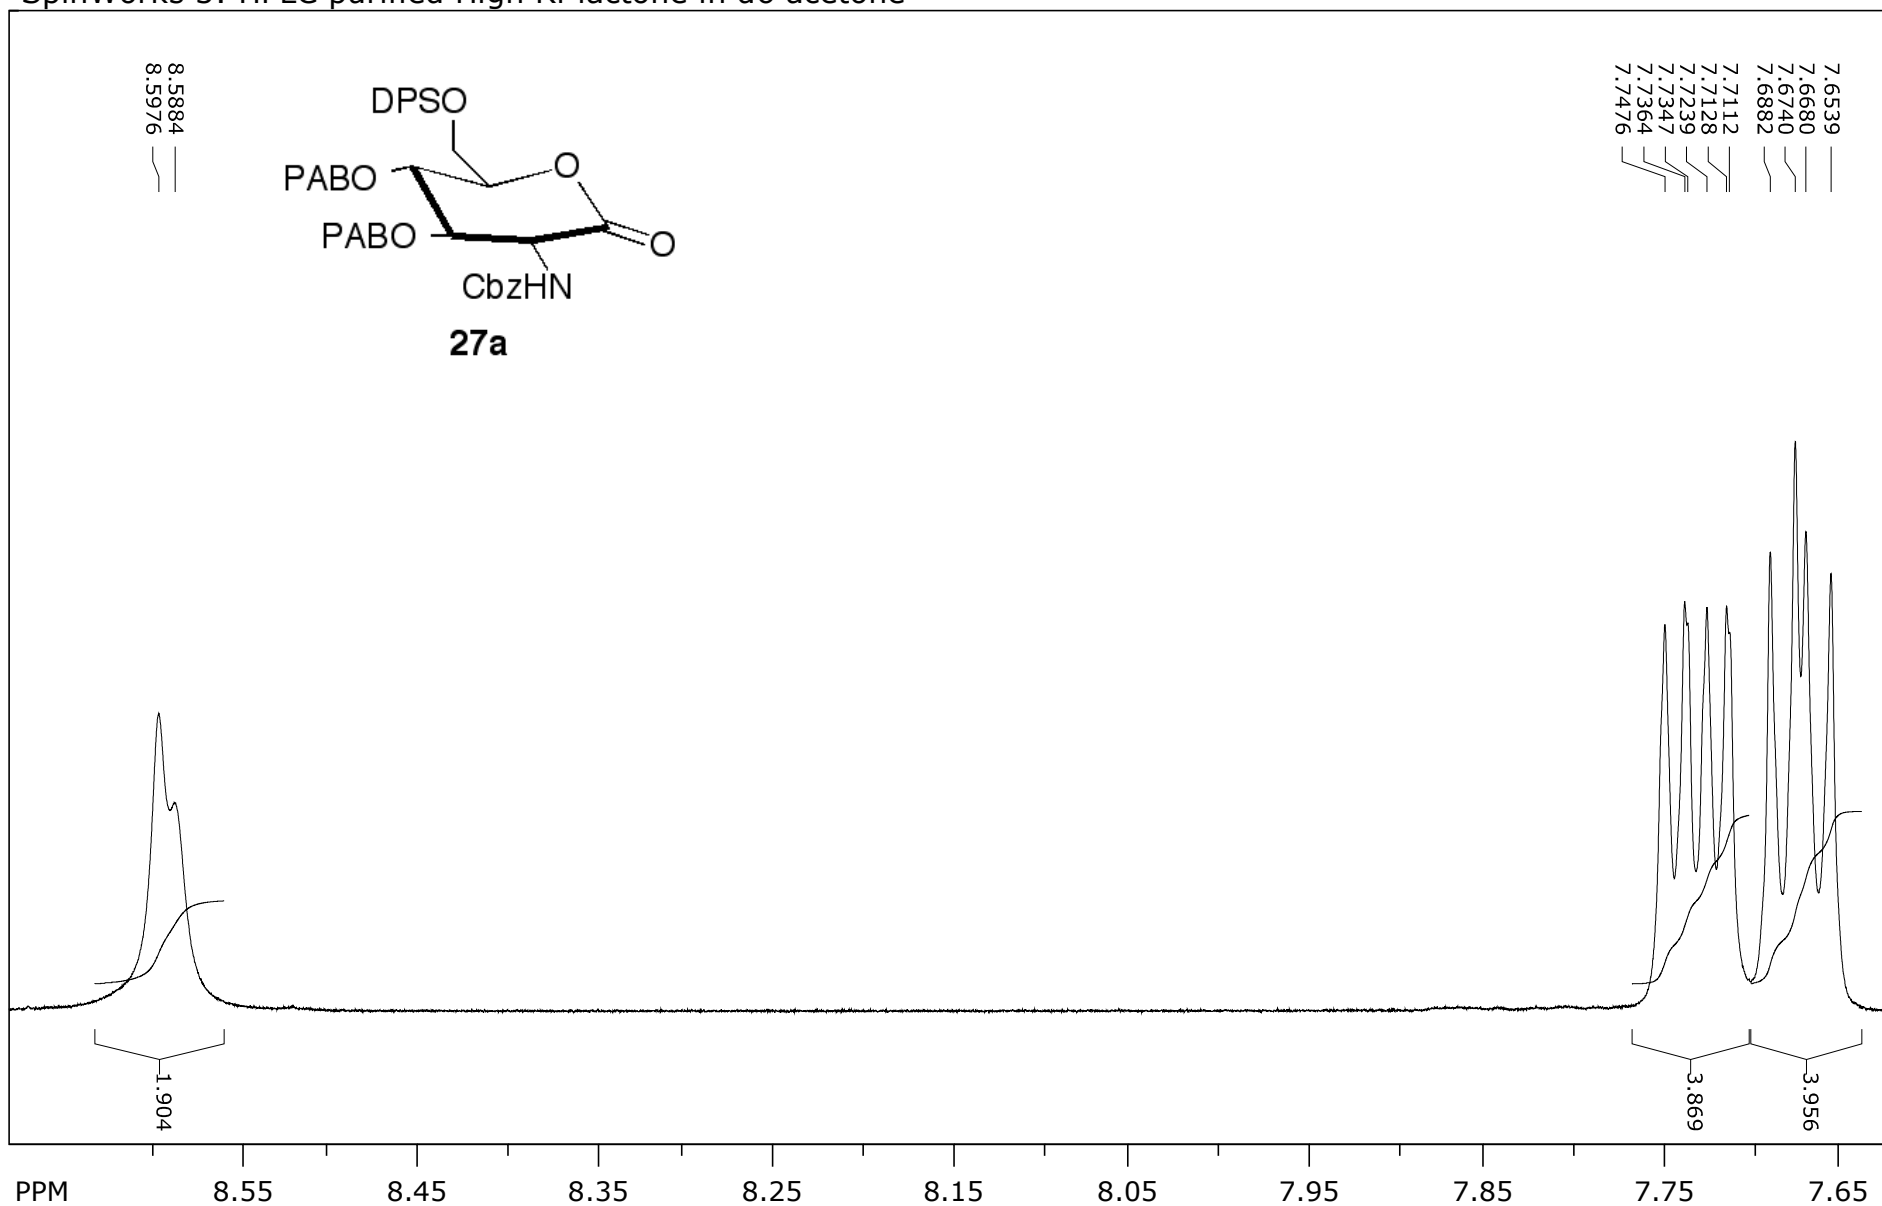

file: ...MR Data\HiRfLactone\HPLCPur\_1H\fid exp: <zgpr>  
transmitter freq.: 600.553538 MHz  
time domain size: 65536 points  
width: 8417.51 Hz = 14.0162 ppm = 0.128441 Hz/pt  
number of scans: 32

freq. of 0 ppm: 600.550010 MHz  
processed size: 262144 complex points  
LB: 0.000 GF: 0.0000  
Hz/cm: 25.518 ppm/cm: 0.04249

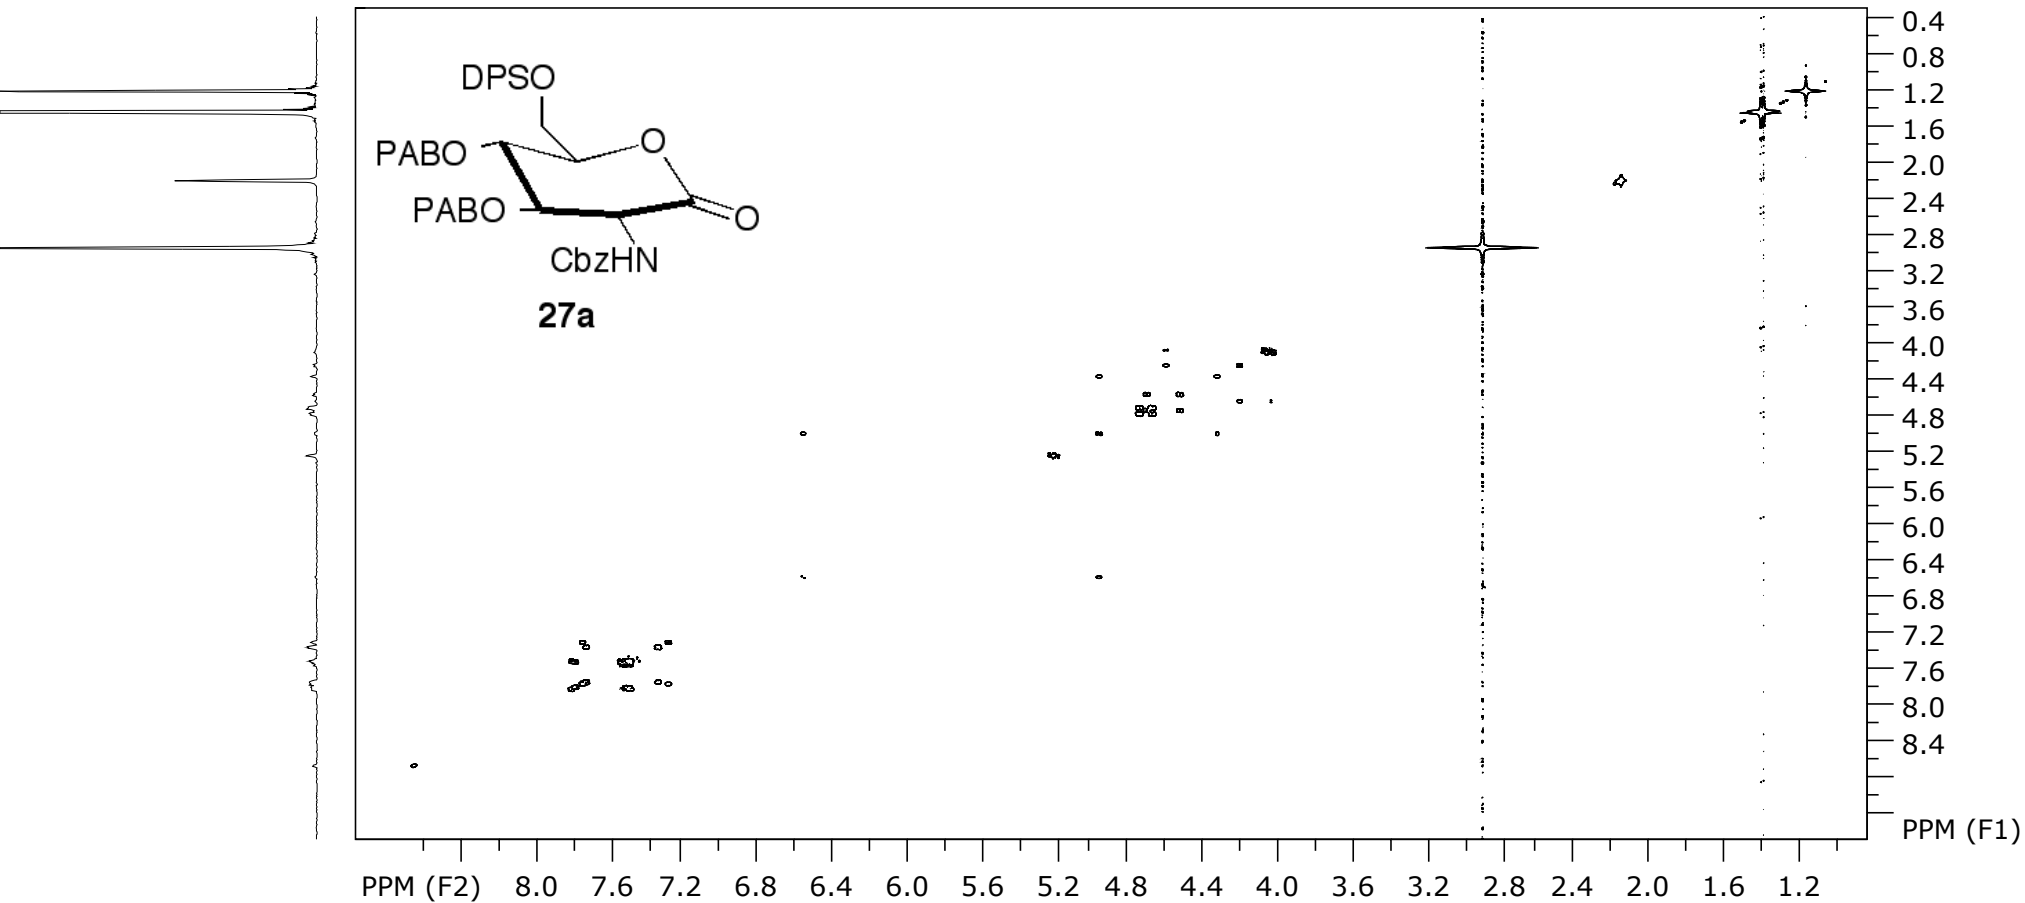

file: ... Data\HiRfLactone\HPLCPur\_COSY\ser  
 expt: <cosygpqf>  
 transmitter freq: 600.552832 MHz  
 time domain size: 4096 by 1024 points  
 width (F2): 7211.54 Hz = 12.0082 ppm = 1.7606 Hz/pt  
 number of scans: 2

F2: freq. of 0 ppm: 600.5499623 MHz  
 processed size: 2048 complex points  
 window function: Sine  
 shift: 0.0 degrees  
 Hz/cm: 244.532 ppm/cm: 0.40718

F1: freq. of 0 ppm: 600.5499623 MHz  
 processed size: 2048 complex points  
 window function: Sine  
 shift: 0.0 degrees  
 Hz/cm: 502.313 ppm/cm: 0.83642

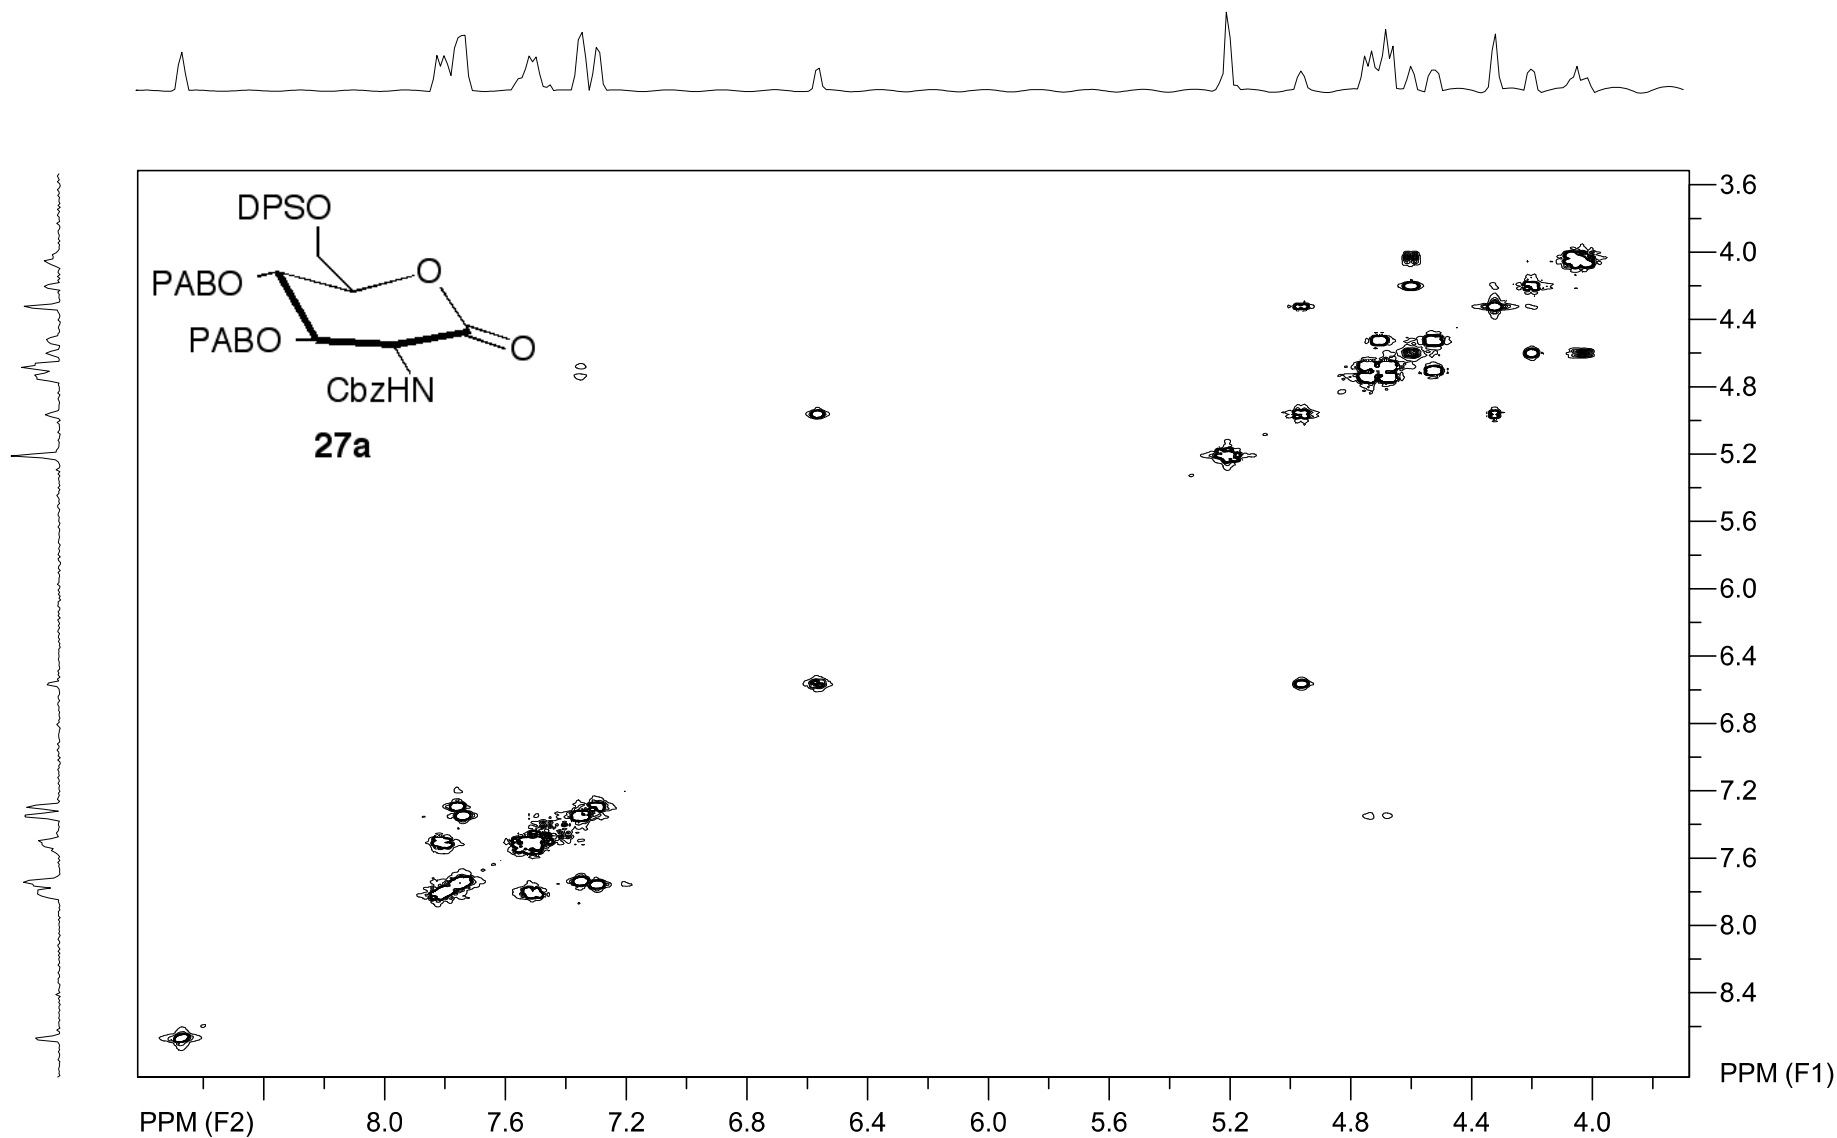

file: C:\Users\Jeff\Documents\NMR Folder\NMR Data\HiRfLactone\HPLCPur\_COSY\ser  
 transmitter freq.: 600.552832 MHz  
 time domain size: 4096 by 1024 points  
 width (F2): 7211.50 Hz = 12.008167 ppm = 1.760621 Hz/pt  
 number of scans: 2

expt: <cosyF2:ffreq. of 0 ppm: 600.549962 MHz  
 processed size: 1024 complex points  
 window function: Sine  
 shift: 0.0 degrees  
 Hz/cm: 150.550 ppm/cm: 0.25069

F1: freq. of 0 ppm: 600.549962 MHz  
 processed size: 1024 complex points  
 window function: Sine  
 shift: 0.0 degrees  
 Hz/cm: 269.562 ppm/cm: 0.44886

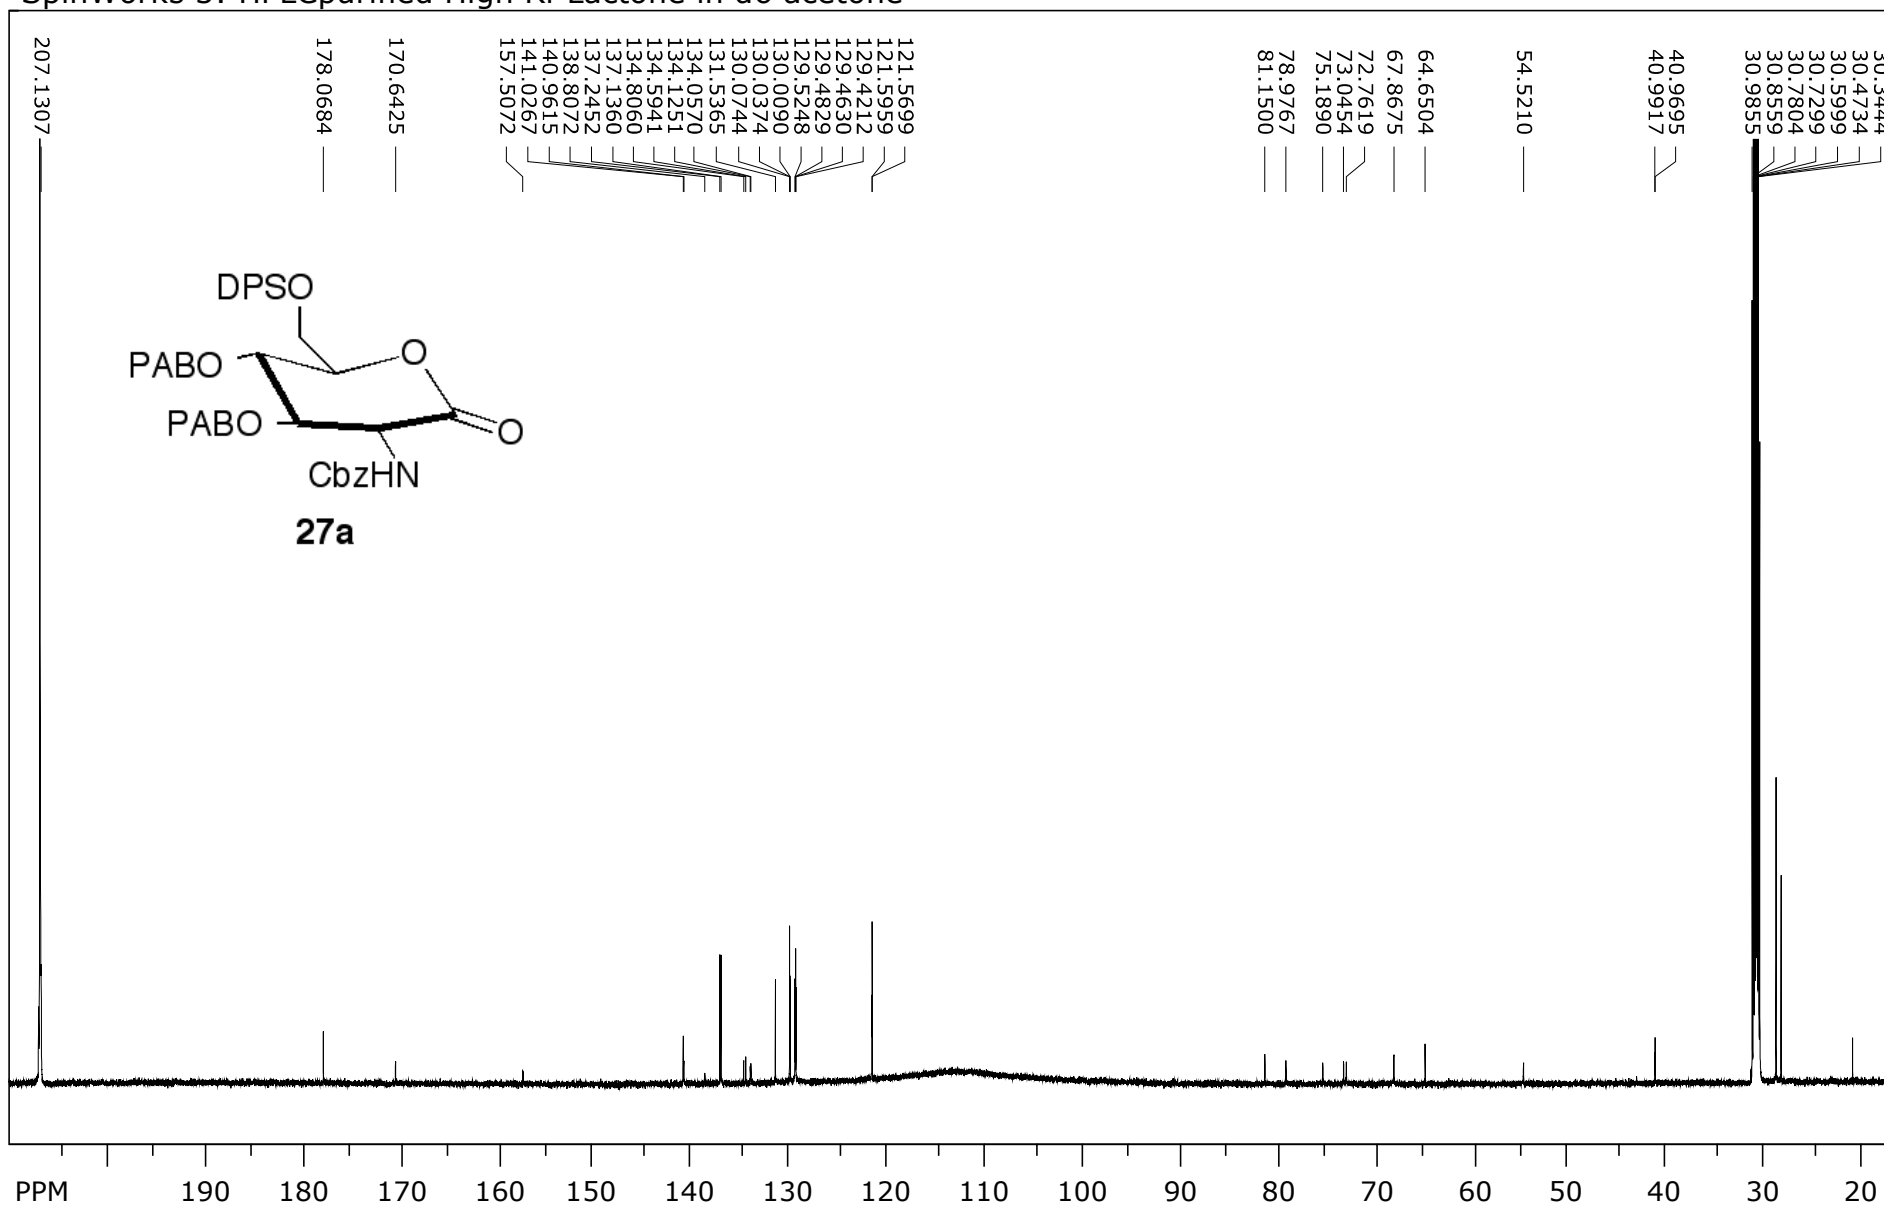

file: ...R Data\HiRfLactone\HPLCPur\_13C\fid expt: <zpgg30>  
transmitter freq.: 151.023519 MHz  
time domain size: 65536 points  
width: 36057.69 Hz = 238.7555 ppm = 0.550197 Hz/pt  
number of scans: 10240

freq. of 0 ppm: 151.008166 MHz  
processed size: 32768 complex points  
LB: 0.700 GF: 0.0000  
Hz/cm: 1170.356 ppm/cm: 7.74949

|               |                      |             |                      |                 |              |                        |                      |
|---------------|----------------------|-------------|----------------------|-----------------|--------------|------------------------|----------------------|
| Sample Name   | Jeff-30              | Position    | Vial 31              | Instrument Name | Instrument 1 | User Name              | DYL                  |
| Inj Vol       | 2                    | InjPosition |                      | SampleType      | Unknown      | IRM Calibration Status | Some Ions Missed     |
| Data Filename | C18_Elution3_S30_Jef | ACQ Method  | C18 waters symmetry3 | Comment         |              | Acquired Time          | 9/16/2012 3:21:24 AM |

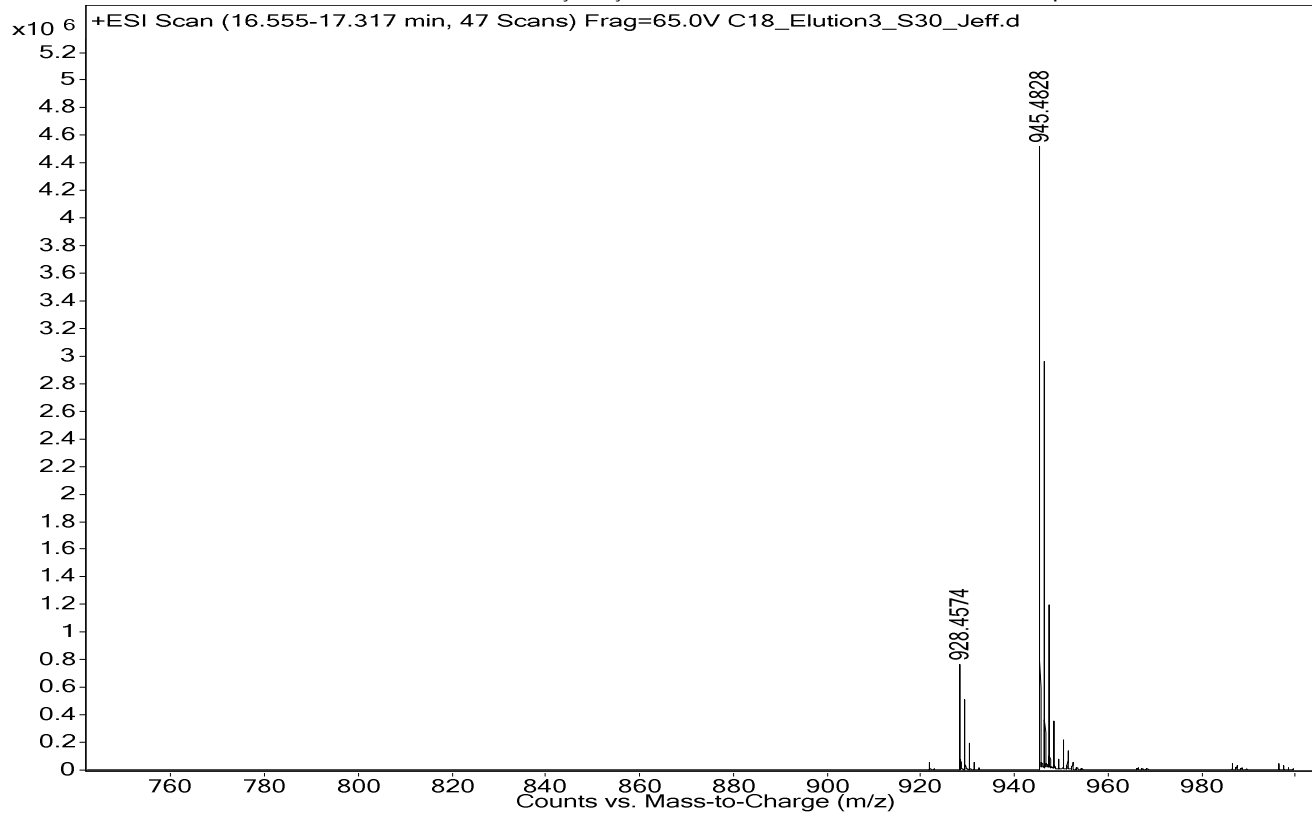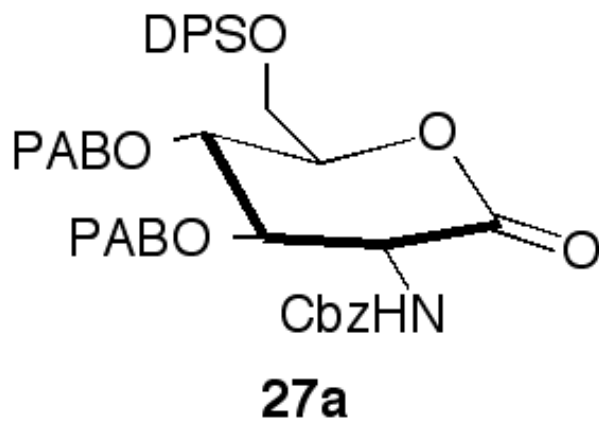

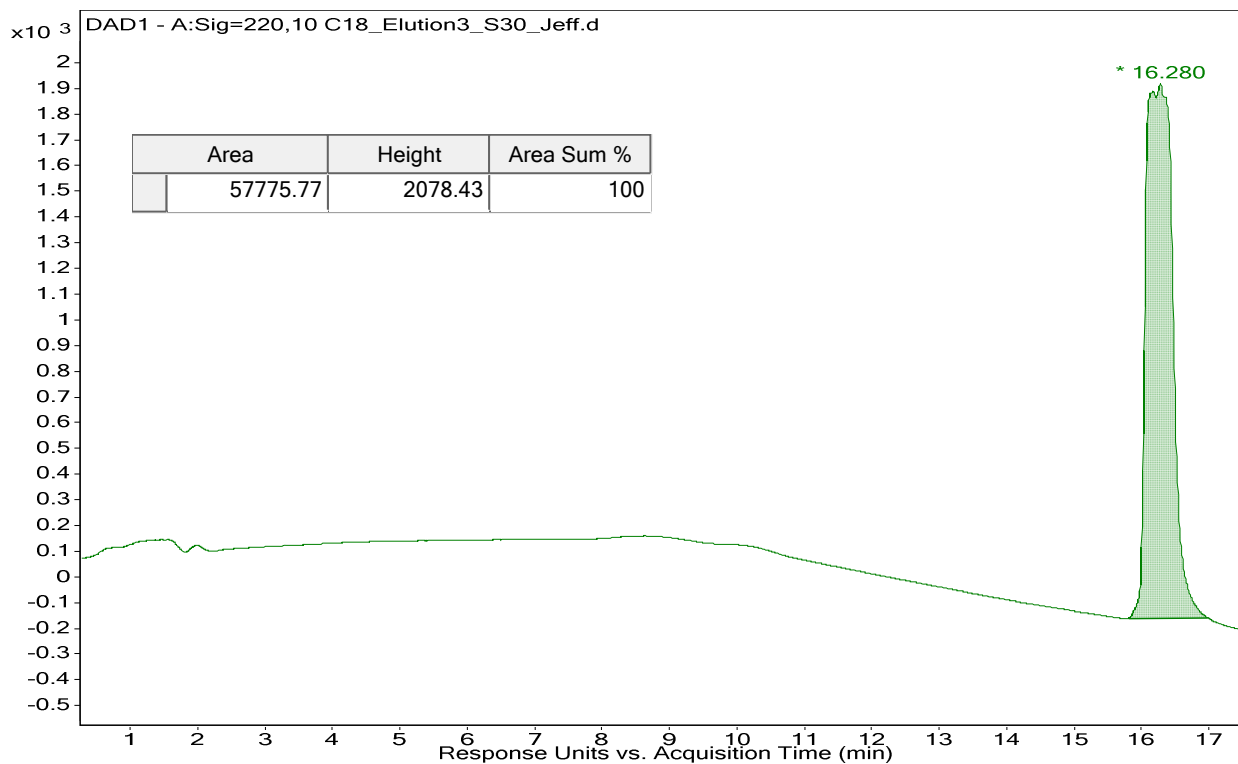

|               |                      |             |                      |                 |              |                        |                      |
|---------------|----------------------|-------------|----------------------|-----------------|--------------|------------------------|----------------------|
| Sample Name   | Jeff-30              | Position    | Vial 31              | Instrument Name | Instrument 1 | User Name              | DYL                  |
| Inj Vol       | 2                    | InjPosition |                      | SampleType      | Unknown      | IRM Calibration Status | Some Ions Missed     |
| Data Filename | C18_Elution3_S30_Jef | ACQ Method  | C18 waters symmetry3 | Comment         |              | Acquired Time          | 9/16/2012 3:21:24 AM |

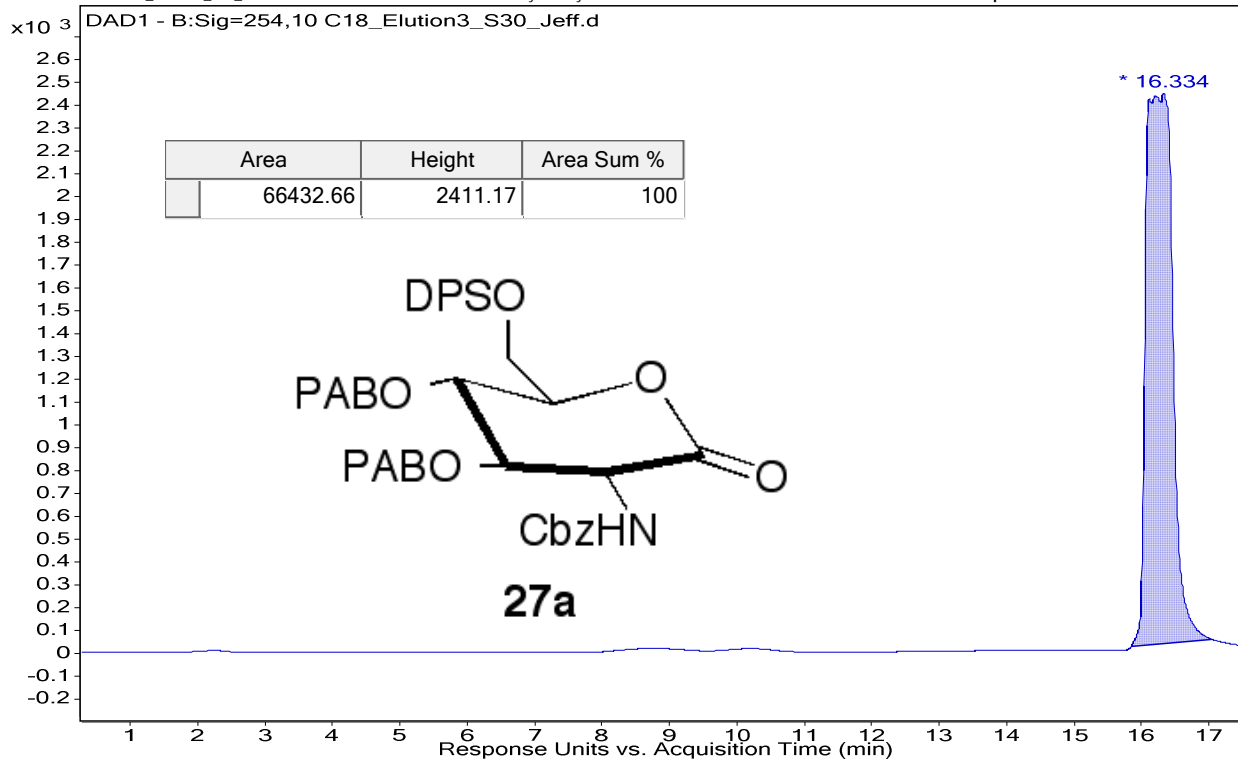

Analysis on a Waters SymmetryShield™ C18 (4.6 mm X 15 cm (i.d. x l.), 3.5 μm) at 0.5 mL/min. Solvent A: 50 mM NH<sub>4</sub>OAc (aq); B: CH<sub>3</sub>CN

| Time (min) | % B |
|------------|-----|
| 0          | 50  |
| 1          | 50  |
| 10         | 100 |
| 20         | 100 |



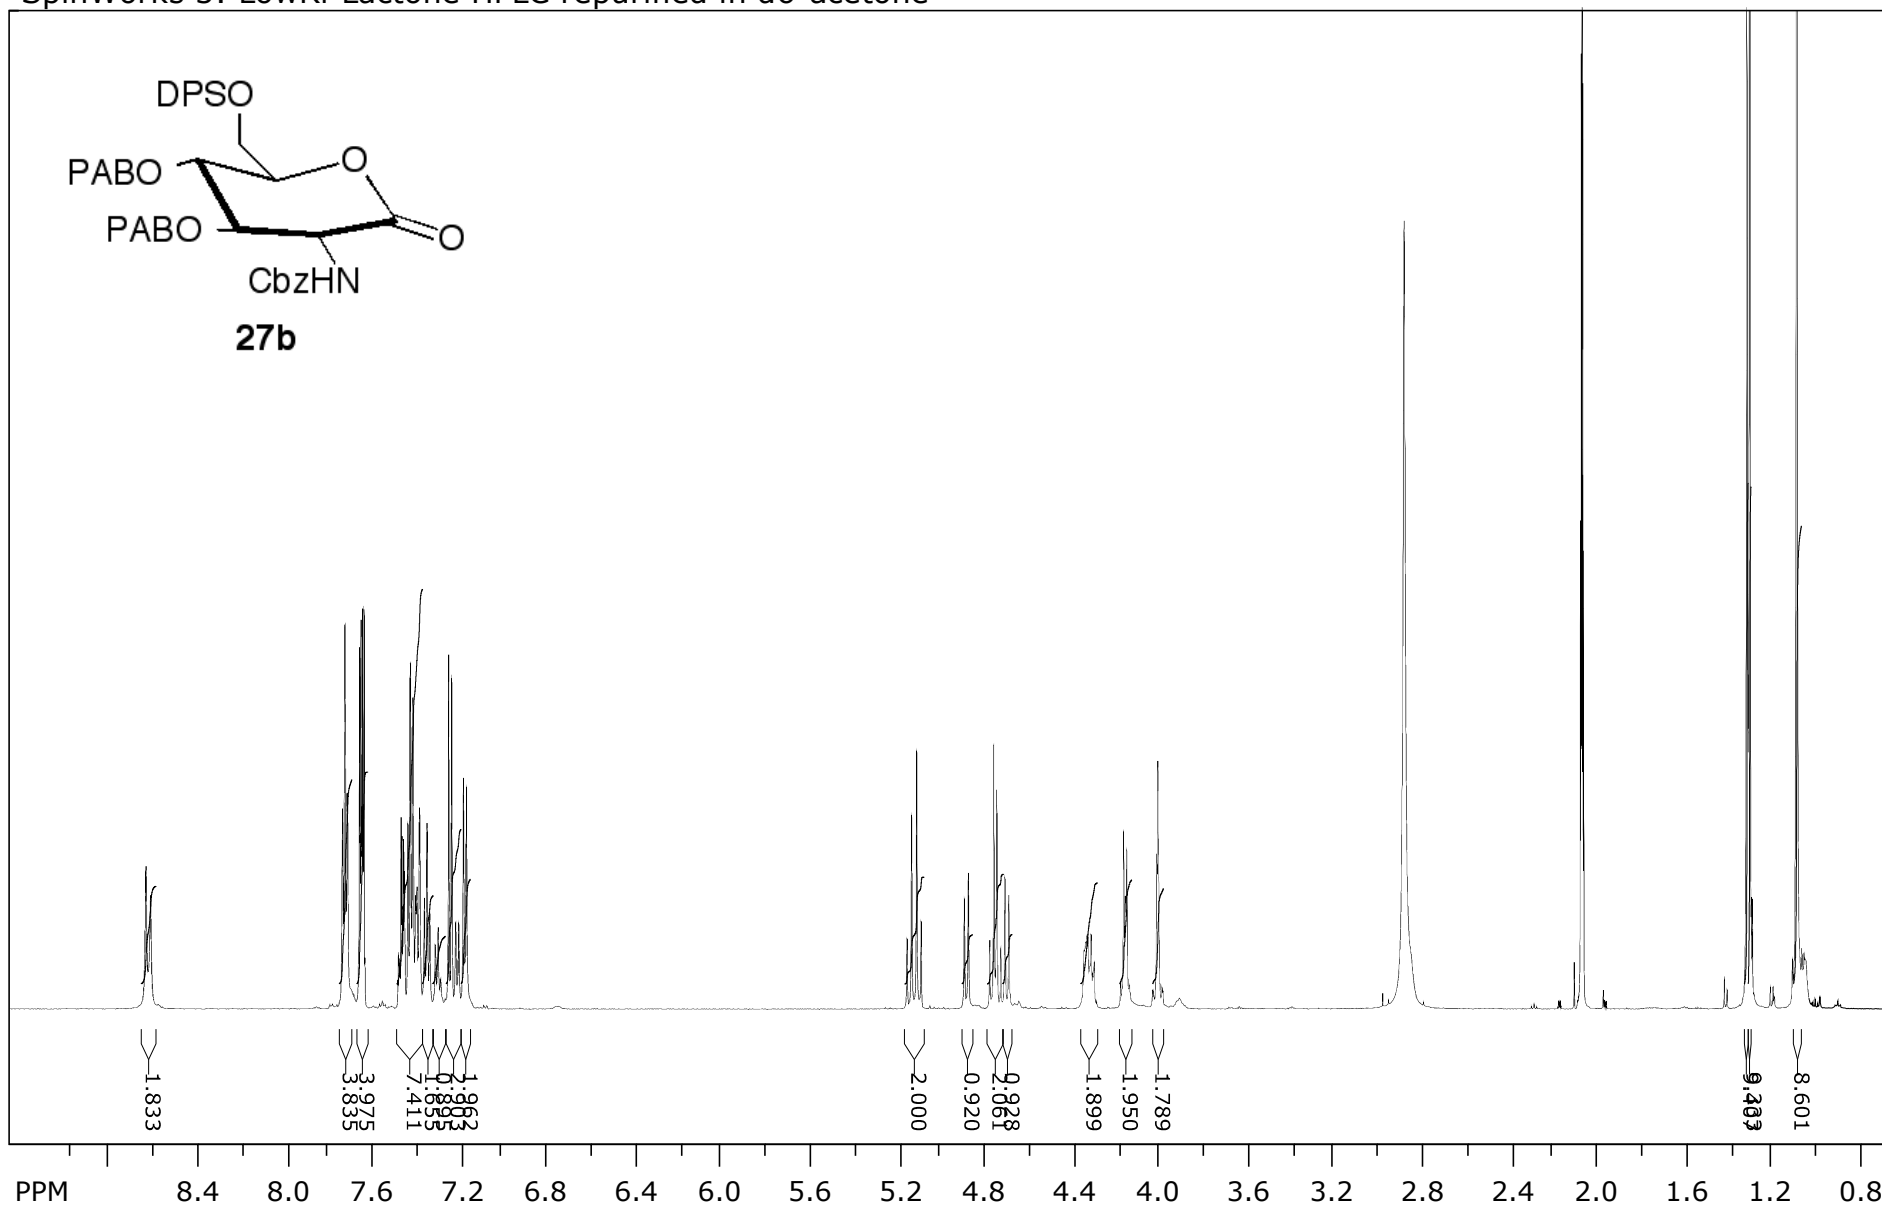

file: ...R Data\lowRfLactoned6acet\_1H\1\fid exp: <zgpr>  
transmitter freq.: 600.553538 MHz  
time domain size: 65536 points  
width: 8417.51 Hz = 14.0162 ppm = 0.128441 Hz/pt  
number of scans: 32

freq. of 0 ppm: 600.550010 MHz  
processed size: 262144 complex points  
LB: 0.000 GF: 0.0000  
Hz/cm: 207.542 ppm/cm: 0.34559

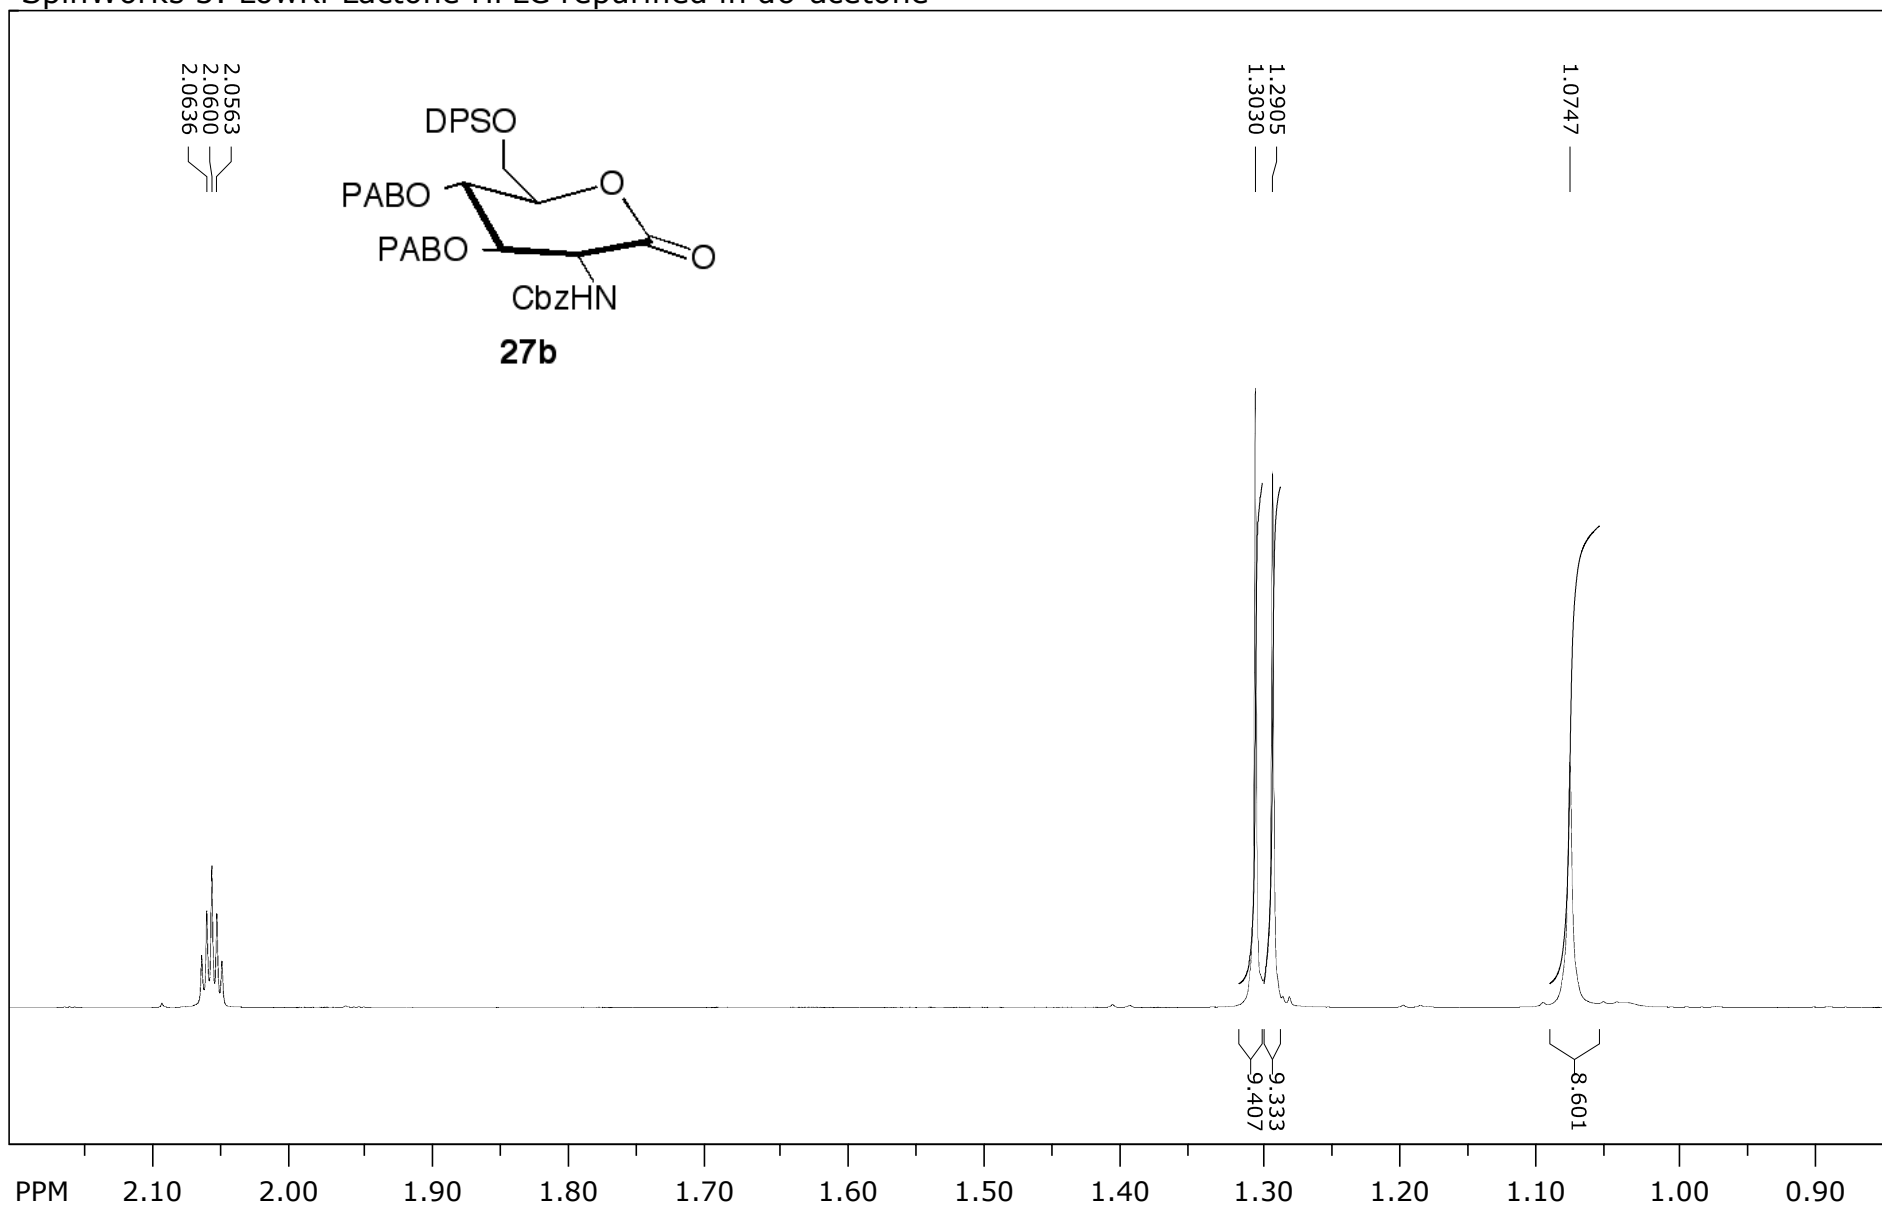

file: ...R Data\lowRfLactoned6acet\_1H\1\fid expt: <zgpr>  
transmitter freq.: 600.553538 MHz  
time domain size: 65536 points  
width: 8417.51 Hz = 14.0162 ppm = 0.128441 Hz/pt  
number of scans: 32

freq. of 0 ppm: 600.550010 MHz  
processed size: 262144 complex points  
LB: 0.000 GF: 0.0000  
Hz/cm: 32.799 ppm/cm: 0.05461

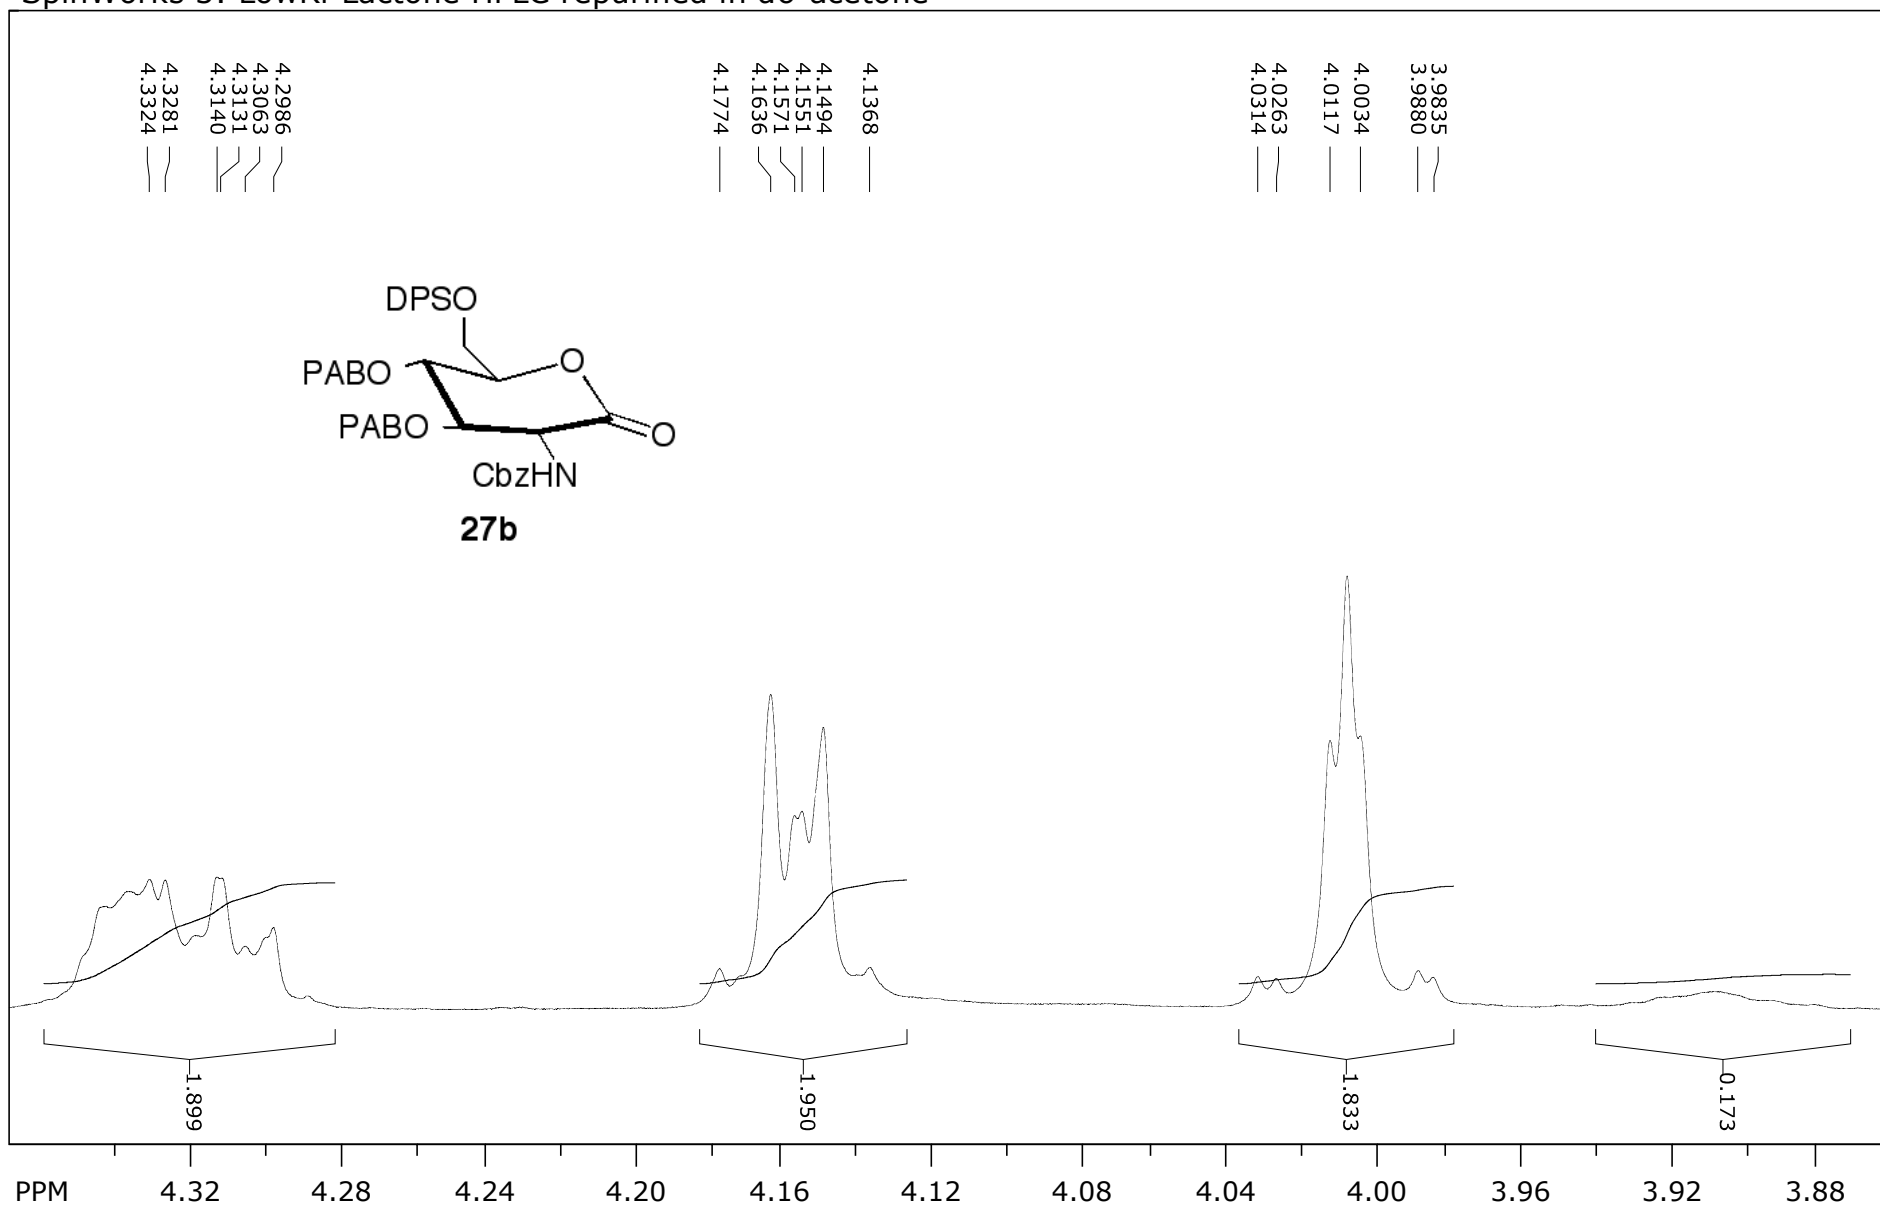

file: ...R Data\lowRfLactoned6acet\_1H\1\fid expt: <zgpr>  
 transmitter freq.: 600.553538 MHz  
 time domain size: 65536 points  
 width: 8417.51 Hz = 14.0162 ppm = 0.128441 Hz/pt  
 number of scans: 32

freq. of 0 ppm: 600.550010 MHz  
 processed size: 262144 complex points  
 LB: 0.000 GF: 0.0000  
 Hz/cm: 12.279 ppm/cm: 0.02045

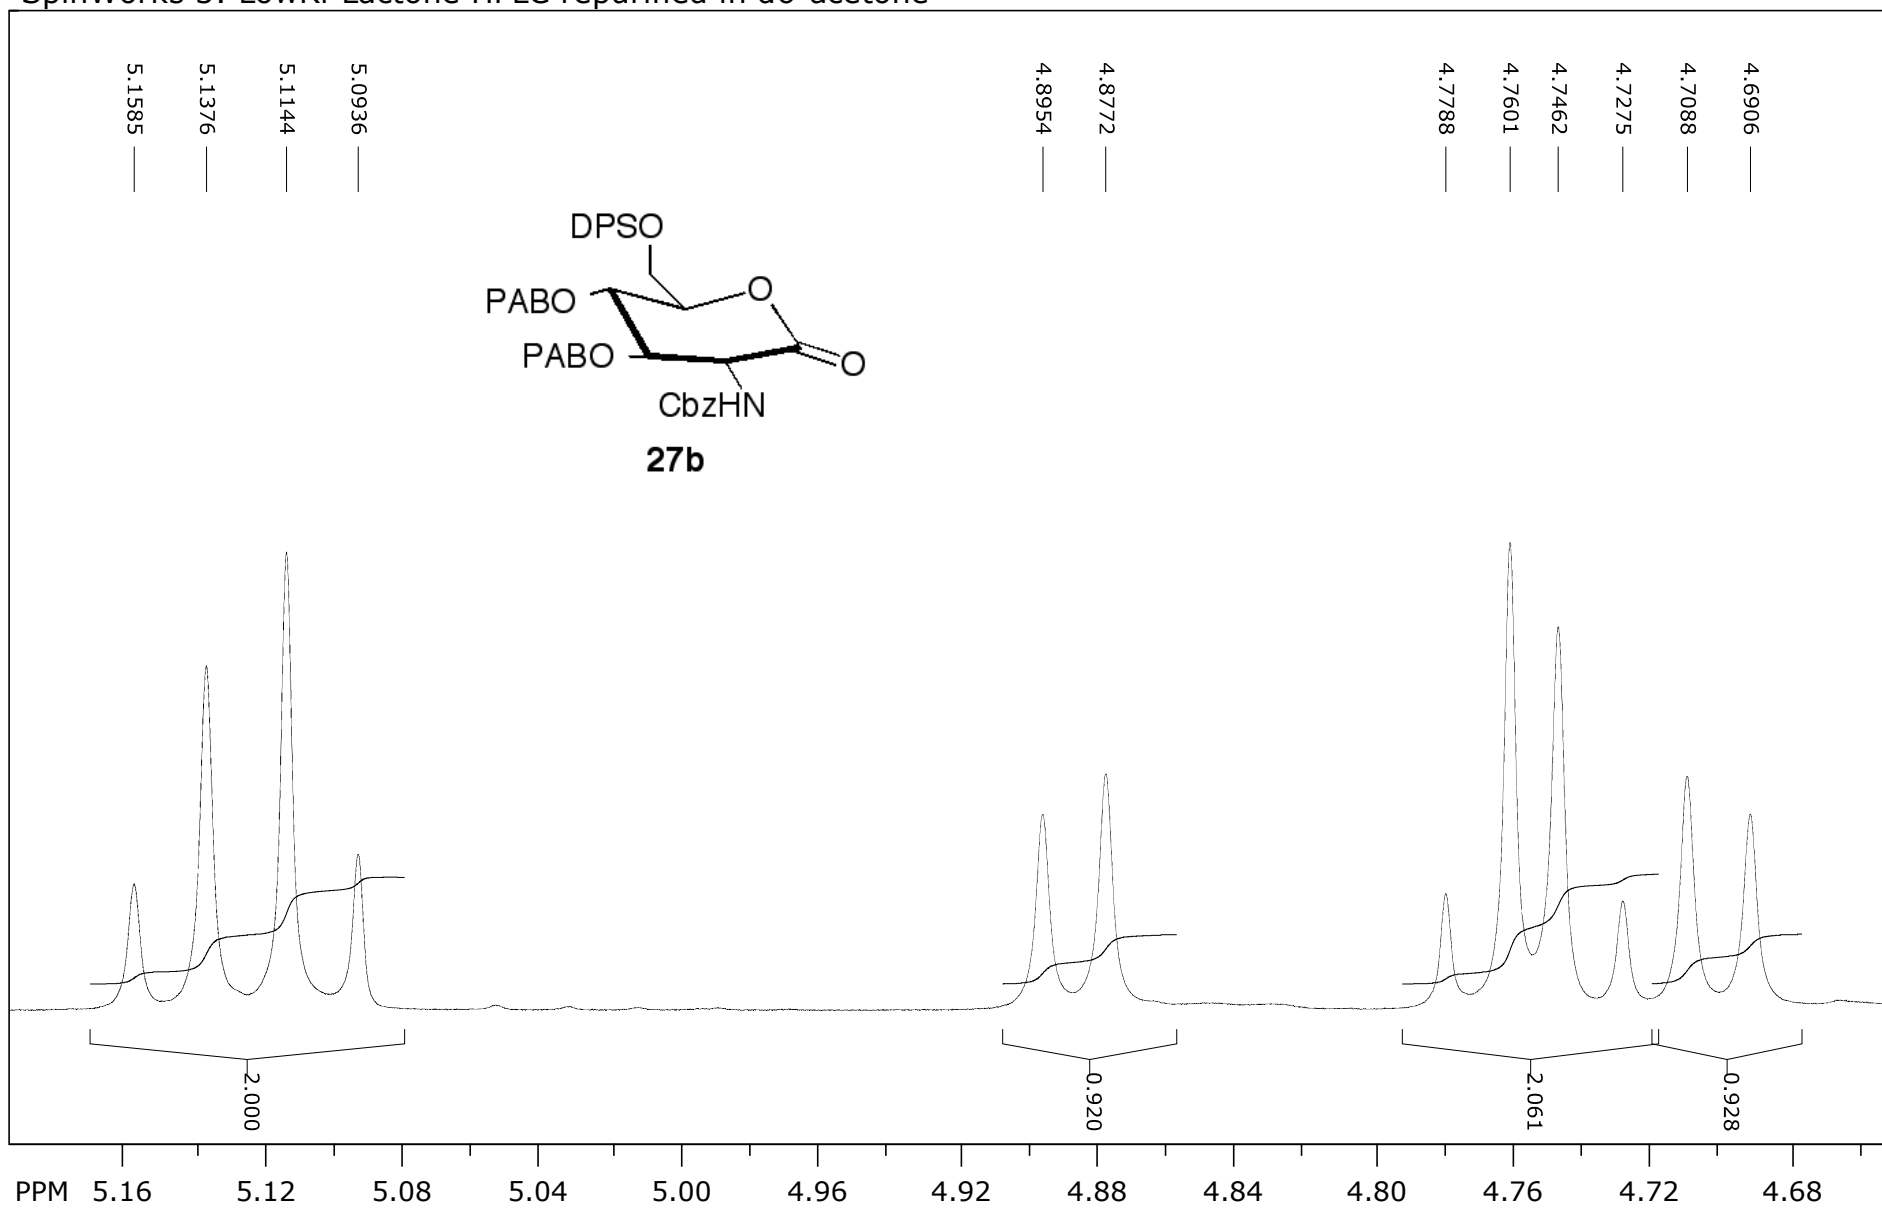

file: ...R Data\lowRfLactoned6acet\_1H\1\fid expt: <zgpr>  
transmitter freq.: 600.553538 MHz  
time domain size: 65536 points  
width: 8417.51 Hz = 14.0162 ppm = 0.128441 Hz/pt  
number of scans: 32

freq. of 0 ppm: 600.550010 MHz  
processed size: 262144 complex points  
LB: 0.000 GF: 0.0000  
Hz/cm: 13.090 ppm/cm: 0.02180

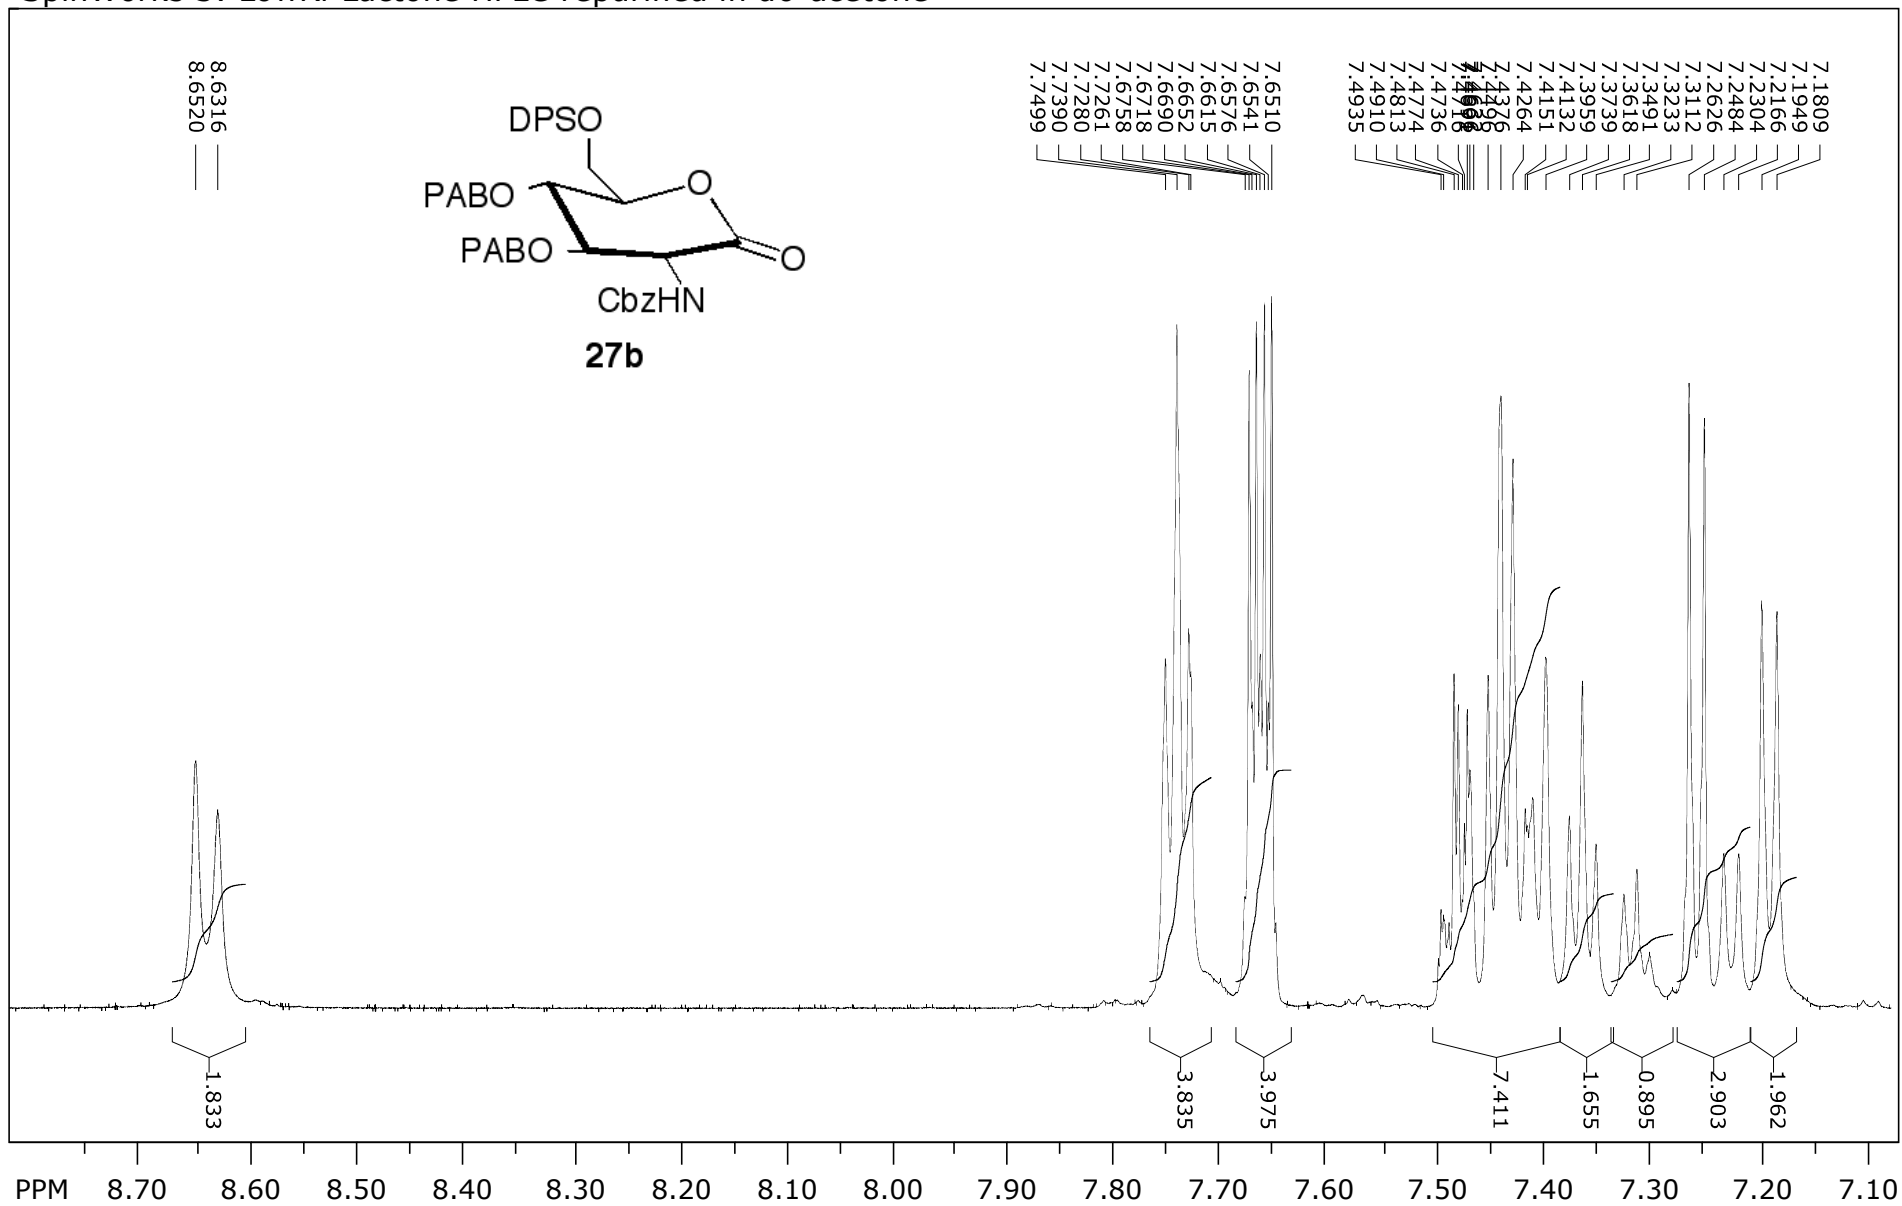

file: ...R Data\lowRfLactoned6acet\_1H\1\fid expt: <zgpr>  
 transmitter freq.: 600.553538 MHz  
 time domain size: 65536 points  
 width: 8417.51 Hz = 14.0162 ppm = 0.128441 Hz/pt  
 number of scans: 32

freq. of 0 ppm: 600.550010 MHz  
 processed size: 262144 complex points  
 LB: 0.000 GF: 0.0000  
 Hz/cm: 42.064 ppm/cm: 0.07004

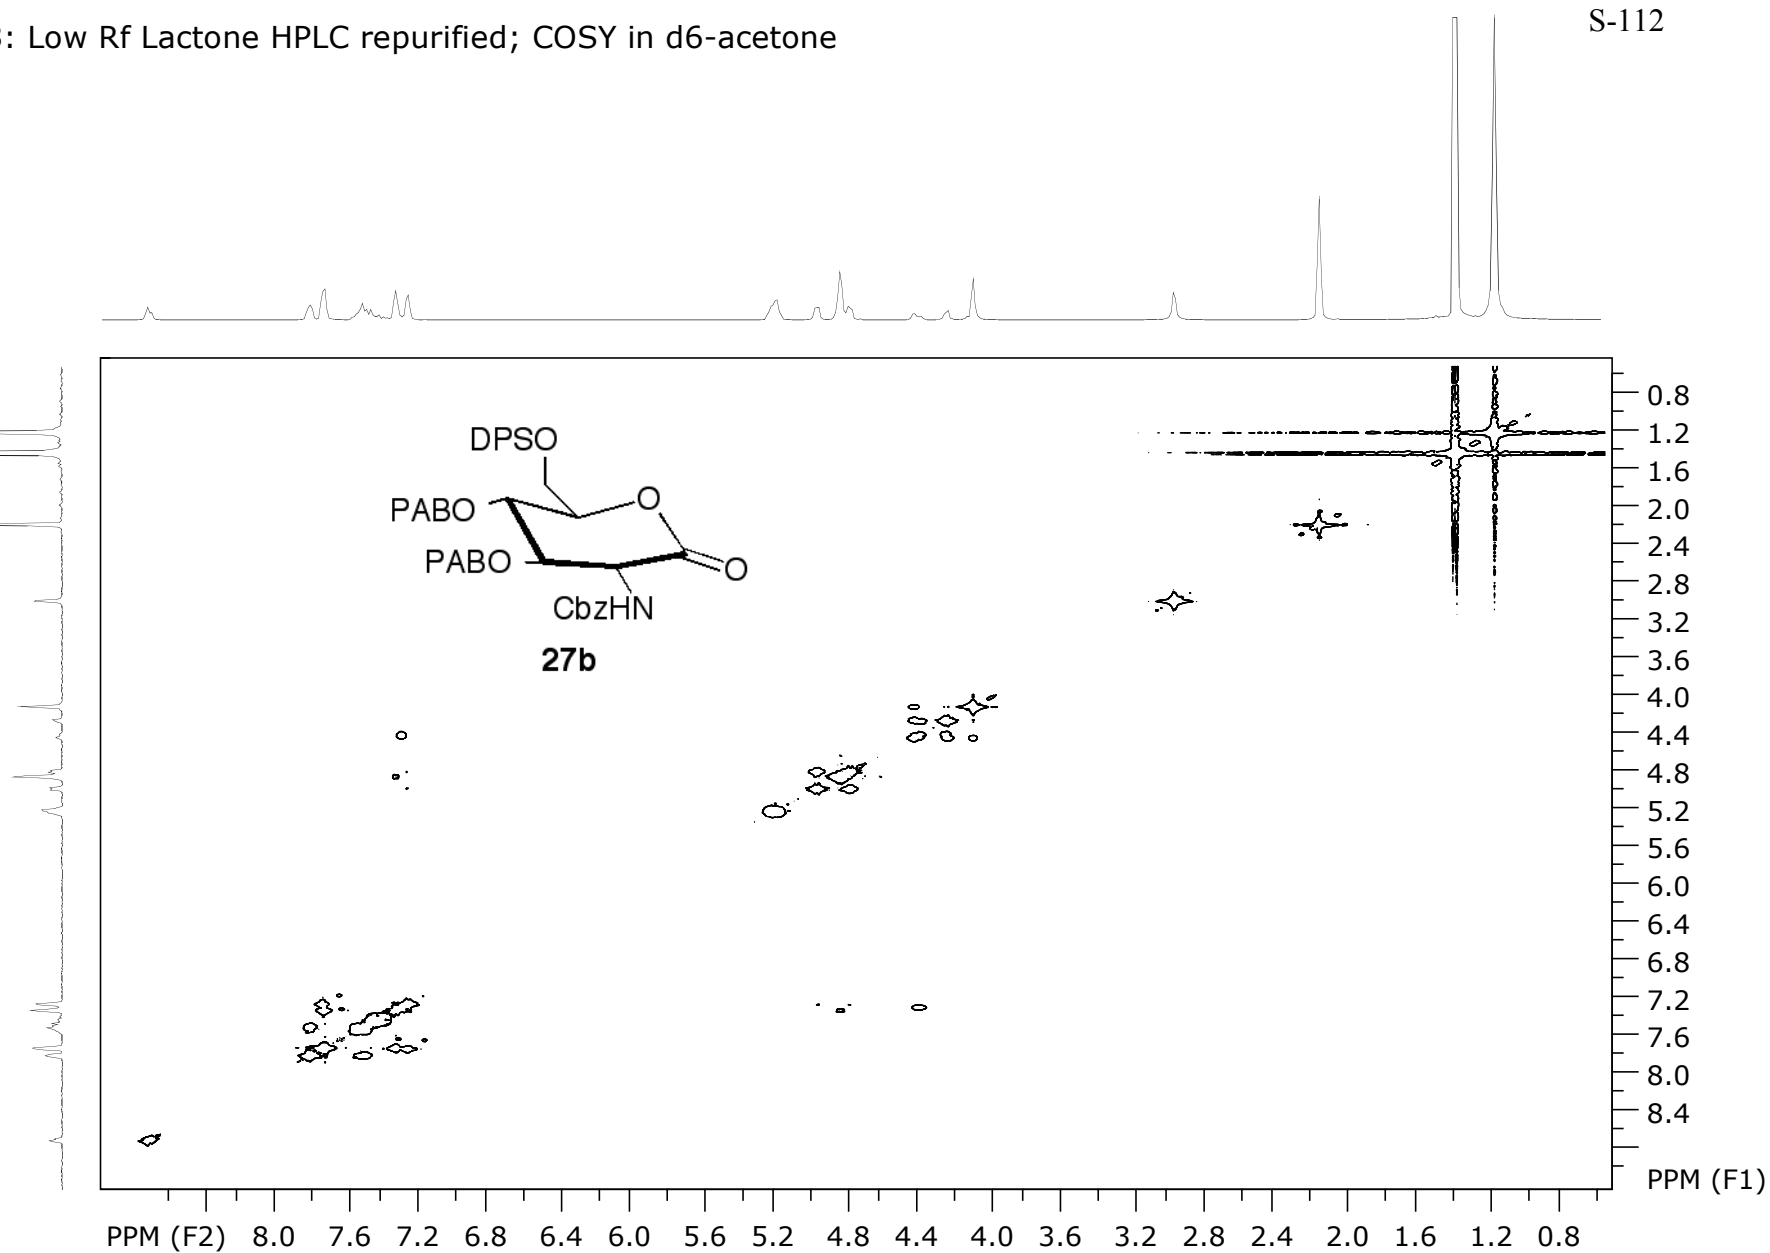

file: ...Data\lowRfLactone\_d6acetCOSY\1\ser  
expt: <cosygpqf>  
transmitter freq: 600.552832 MHz  
time domain size: 2048 by 1024 points  
width (F2): 7211.54 Hz = 12.0082 ppm = 3.5213 Hz/pt  
number of scans: 2

F2: freq. of 0 ppm: 600.5499623 MHz  
processed size: 1024 complex points  
window function: Sine  
shift: 0.0 degrees  
Hz/cm: 254.103 ppm/cm: 0.42311

F1: freq. of 0 ppm: 600.5499623 MHz  
processed size: 1024 complex points  
window function: Sine  
shift: 0.0 degrees  
Hz/cm: 480.897 ppm/cm: 0.80076

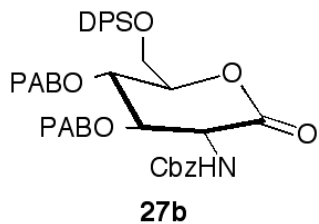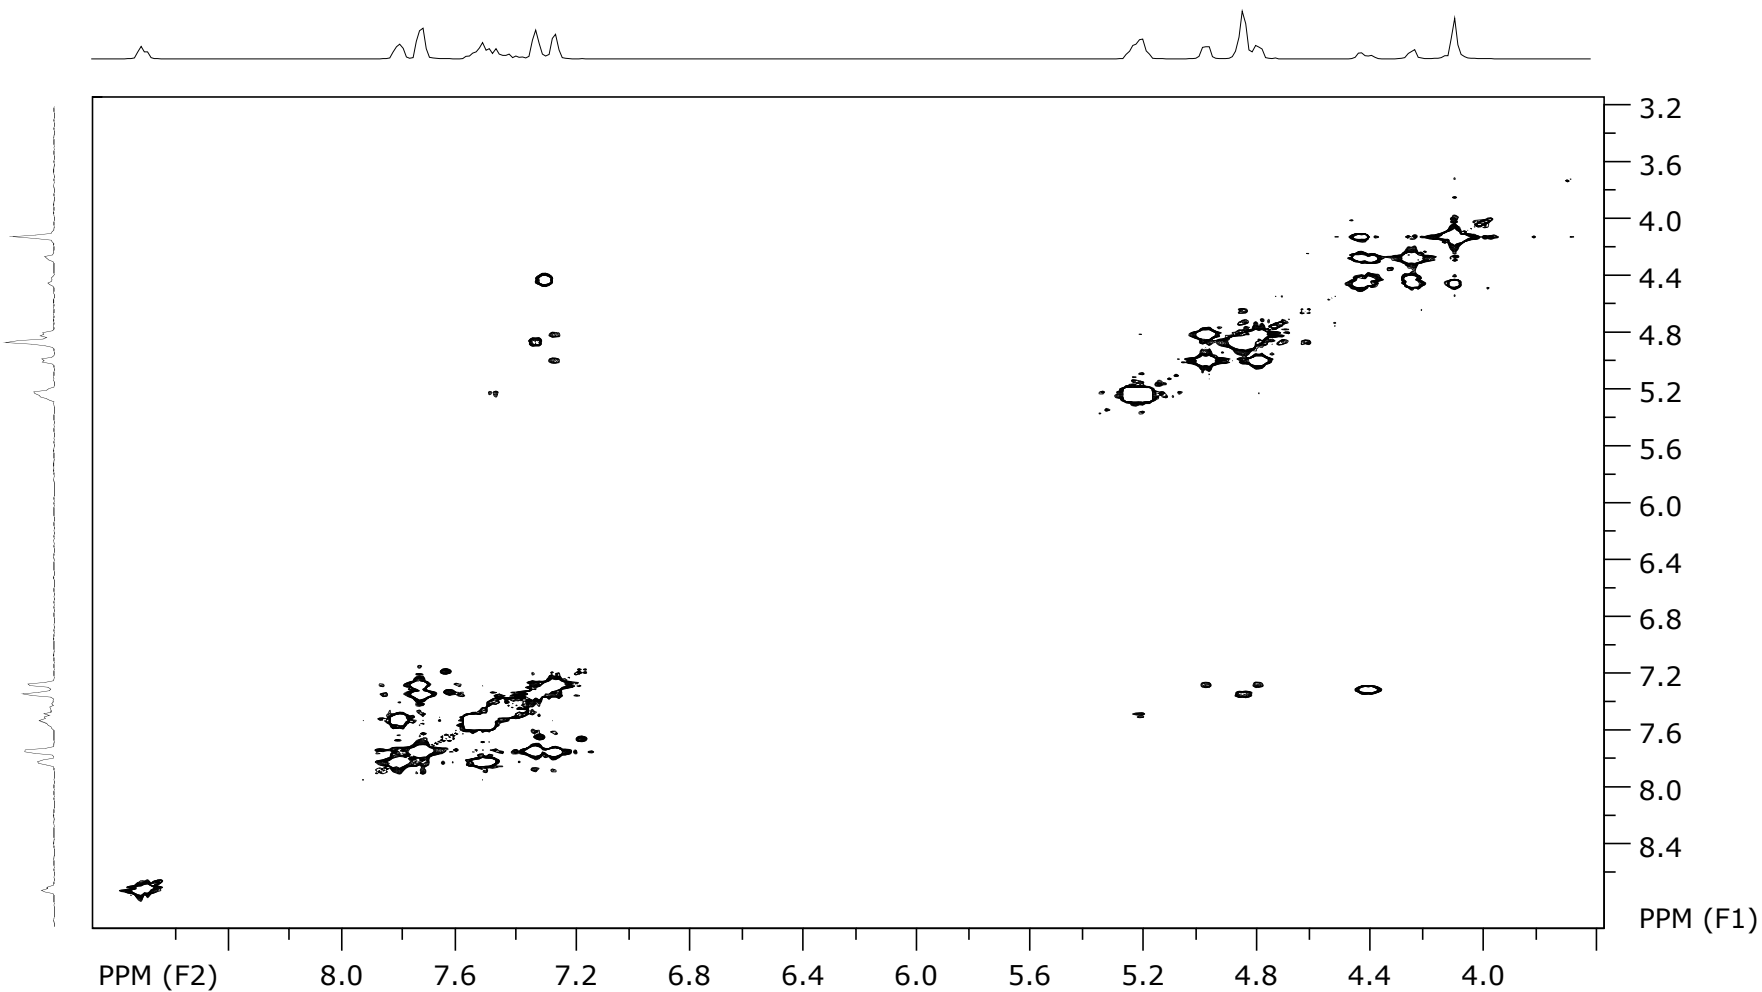

file: ...Data\lowRfLactone\_d6acetCOSY\1\ser  
 expt: <cosygpqf>  
 transmitter freq: 600.552832 MHz  
 time domain size: 2048 by 1024 points  
 width (F2): 7211.54 Hz = 12.0082 ppm = 3.5213 Hz/pt  
 number of scans: 2

F2: freq. of 0 ppm: 600.5499623 MHz  
 processed size: 1024 complex points  
 window function: Sine  
 shift: 0.0 degrees  
 Hz/cm: 159.678 ppm/cm: 0.26589

F1: freq. of 0 ppm: 600.5499623 MHz  
 processed size: 1024 complex points  
 window function: Sine  
 shift: 0.0 degrees  
 Hz/cm: 319.407 ppm/cm: 0.53185

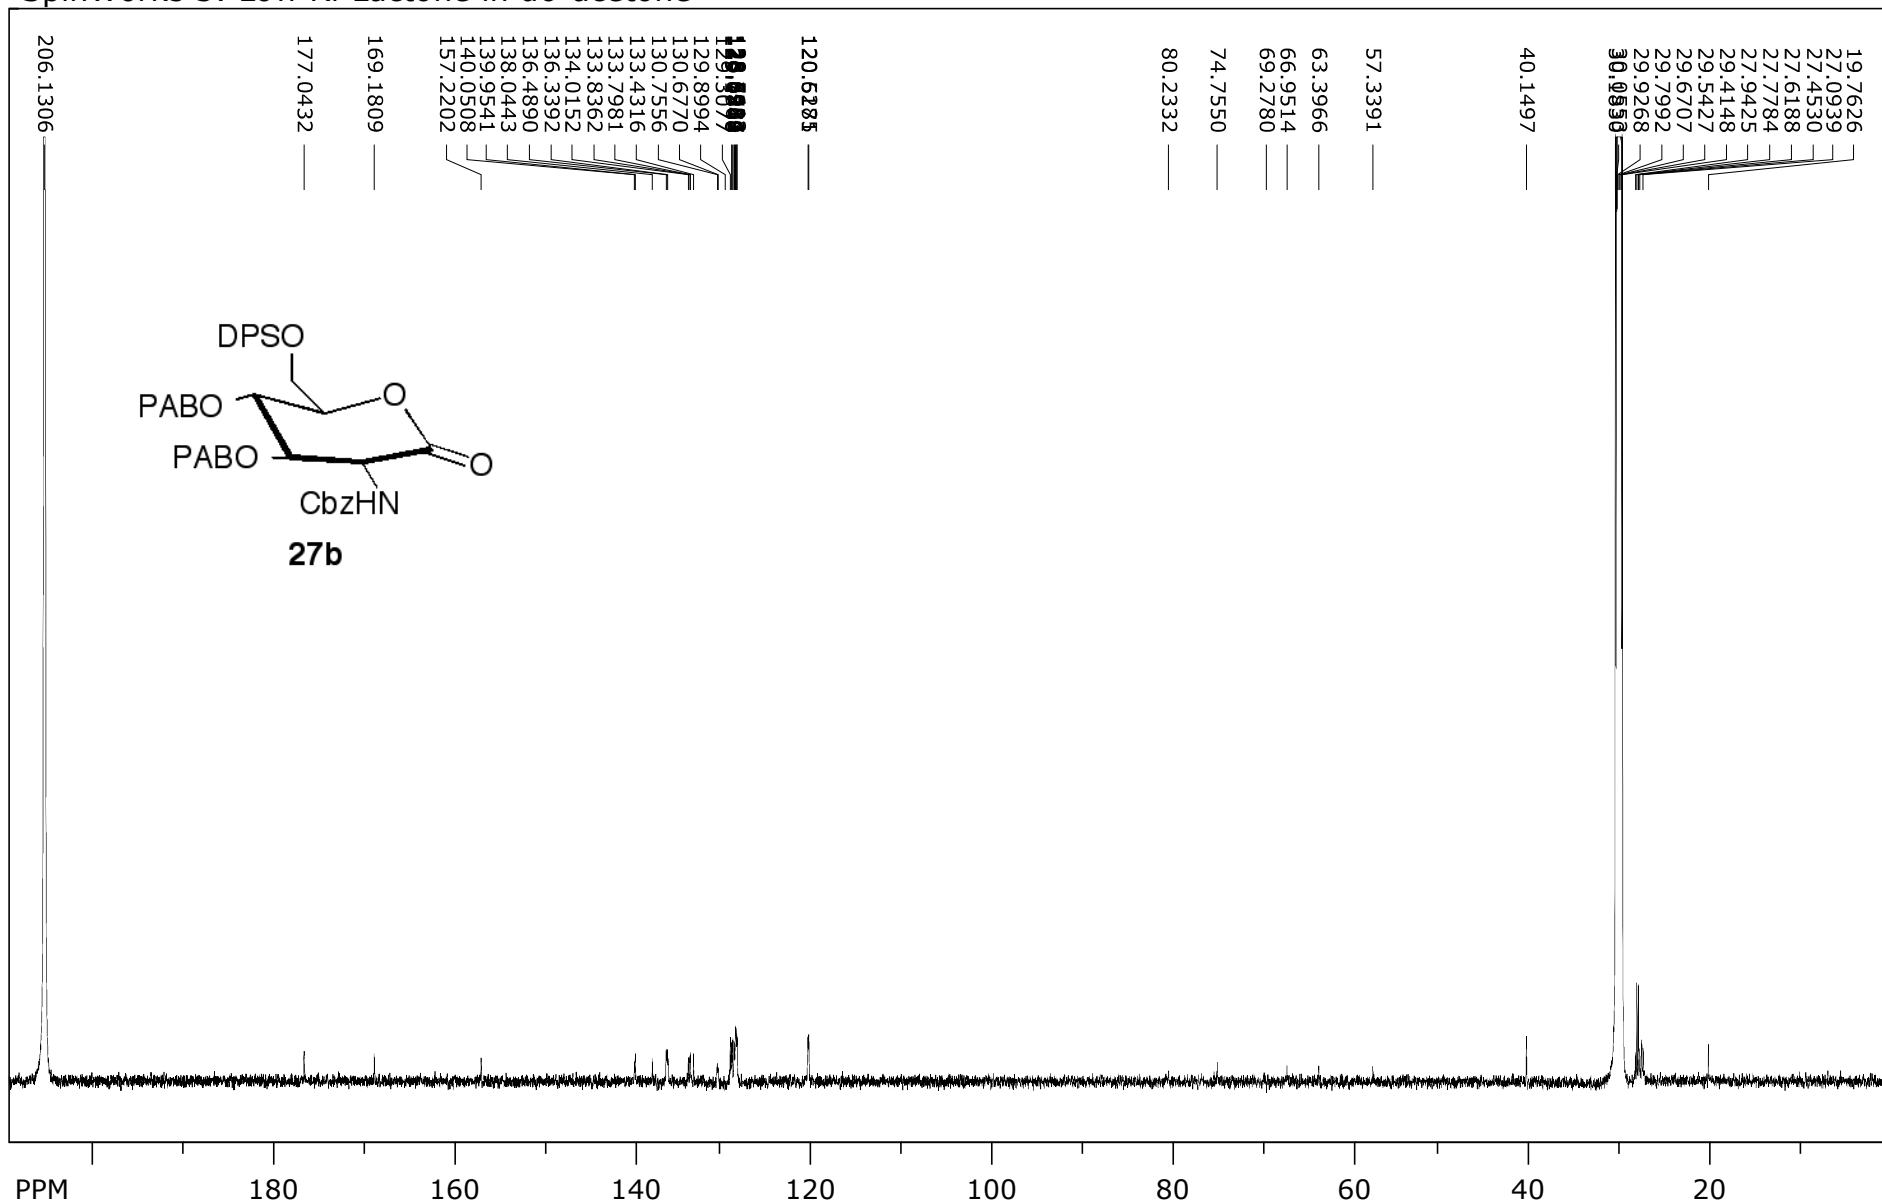

file: ... Data\loRflactone\_13C\_d6acet\1\fid expt: <zpgg30>  
 transmitter freq.: 151.023519 MHz  
 time domain size: 65536 points  
 width: 36057.69 Hz = 238.7555 ppm = 0.550197 Hz/pt  
 number of scans: 22528

freq. of 0 ppm: 151.008292 MHz  
 processed size: 32768 complex points  
 LB: 4.000 GF: 0.0000  
 Hz/cm: 1273.231 ppm/cm: 8.43068



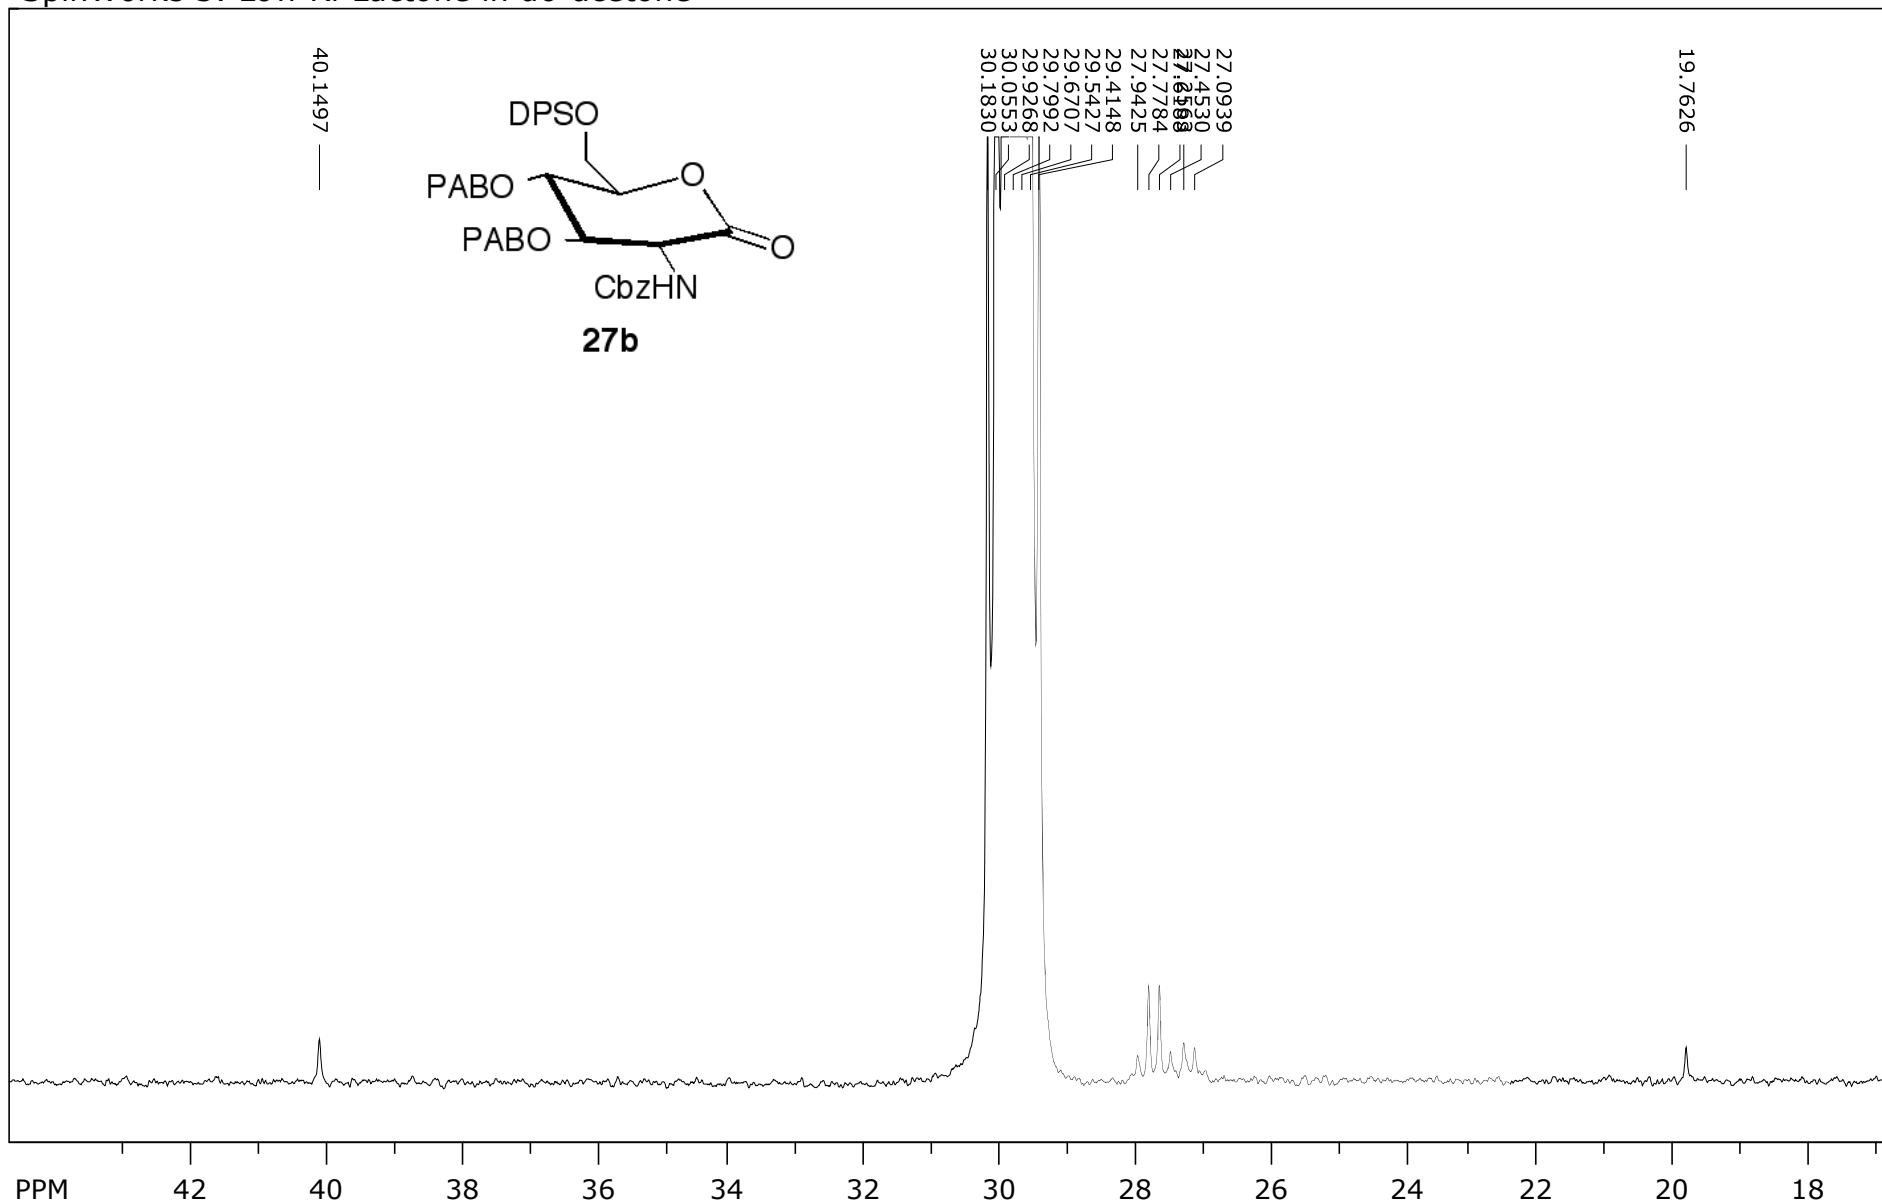

file: ... Data\loRflactone\_13C\_d6acet\1\fid expt: <zpgg30>  
transmitter freq.: 151.023519 MHz  
time domain size: 65536 points  
width: 36057.69 Hz = 238.7555 ppm = 0.550197 Hz/pt  
number of scans: 22528

freq. of 0 ppm: 151.008292 MHz  
processed size: 32768 complex points  
LB: 4.000 GF: 0.0000  
Hz/cm: 169.577 ppm/cm: 1.12285

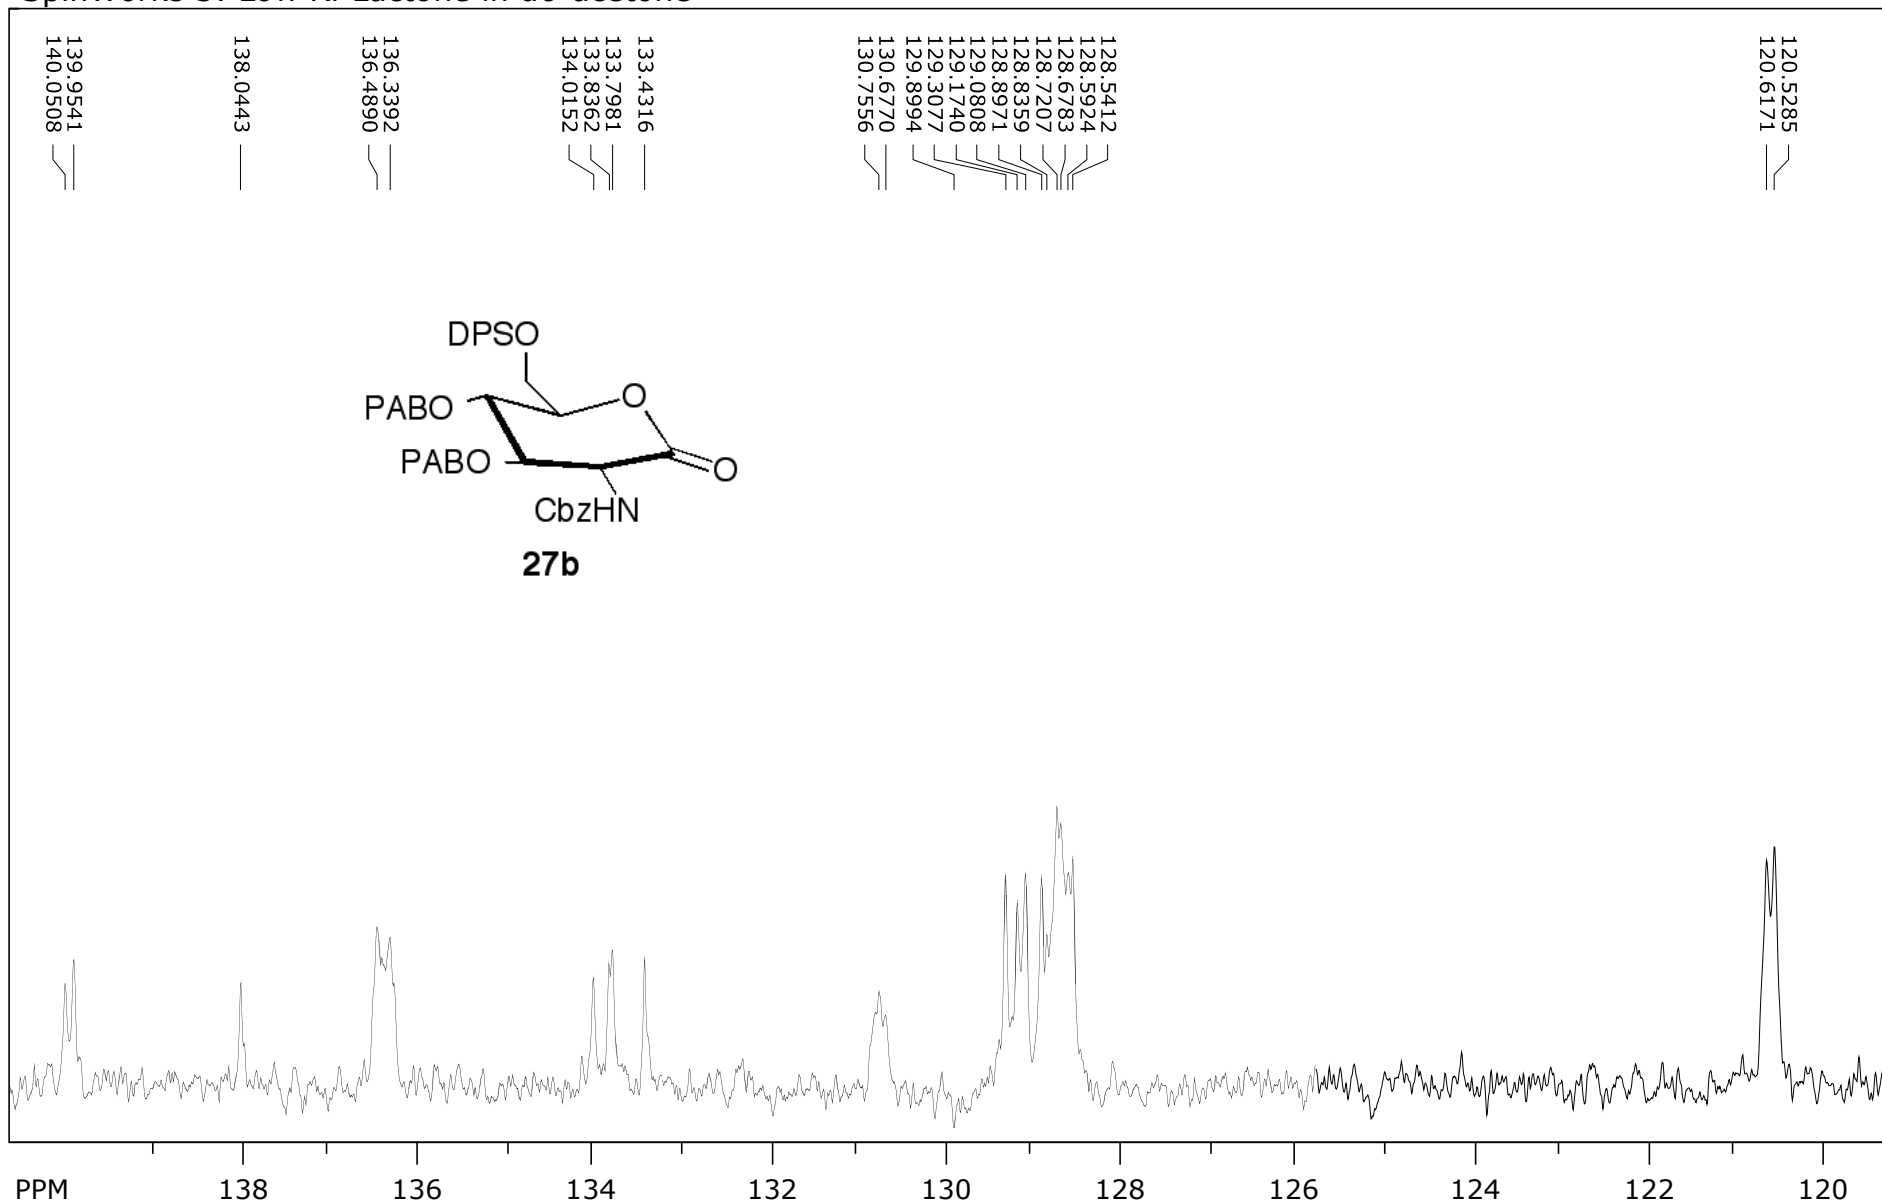

file: ... Data\loRflactone\_13C\_d6acet\1\fid exp: <zpgg30>  
transmitter freq.: 151.023519 MHz  
time domain size: 65536 points  
width: 36057.69 Hz = 238.7555 ppm = 0.550197 Hz/pt  
number of scans: 22528

freq. of 0 ppm: 151.008292 MHz  
processed size: 32768 complex points  
LB: 4.000 GF: 0.0000  
Hz/cm: 129.862 ppm/cm: 0.85988

|               |                      |             |                      |                 |              |                        |                      |
|---------------|----------------------|-------------|----------------------|-----------------|--------------|------------------------|----------------------|
| Sample Name   | Jeff-31              | Position    | Vial 32              | Instrument Name | Instrument 1 | User Name              | DYL                  |
| Inj Vol       | 2                    | InjPosition |                      | SampleType      | Unknown      | IRM Calibration Status | Some Ions Missed     |
| Data Filename | C18_Elution3_S31_Jef | ACQ Method  | C18 waters symmetry3 | Comment         |              | Acquired Time          | 9/16/2012 3:48:07 AM |

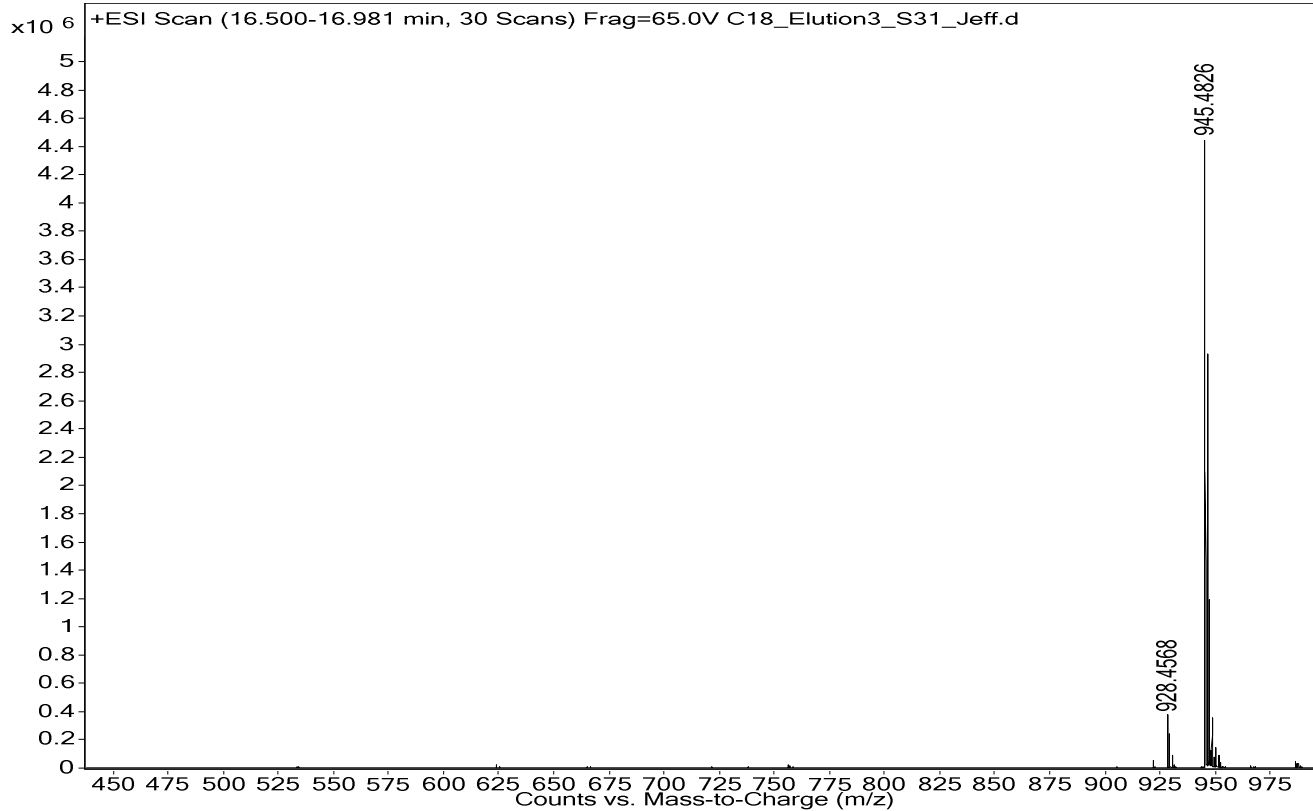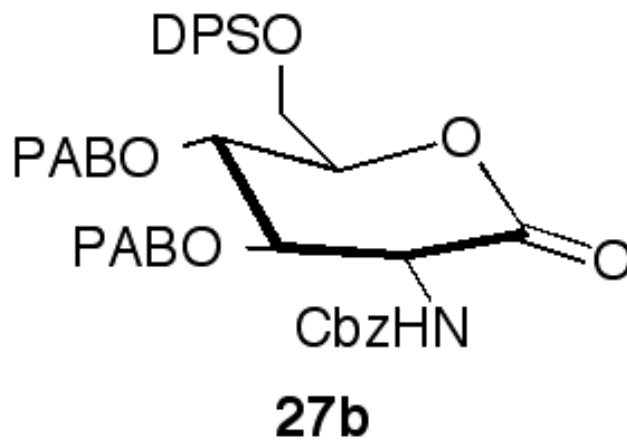

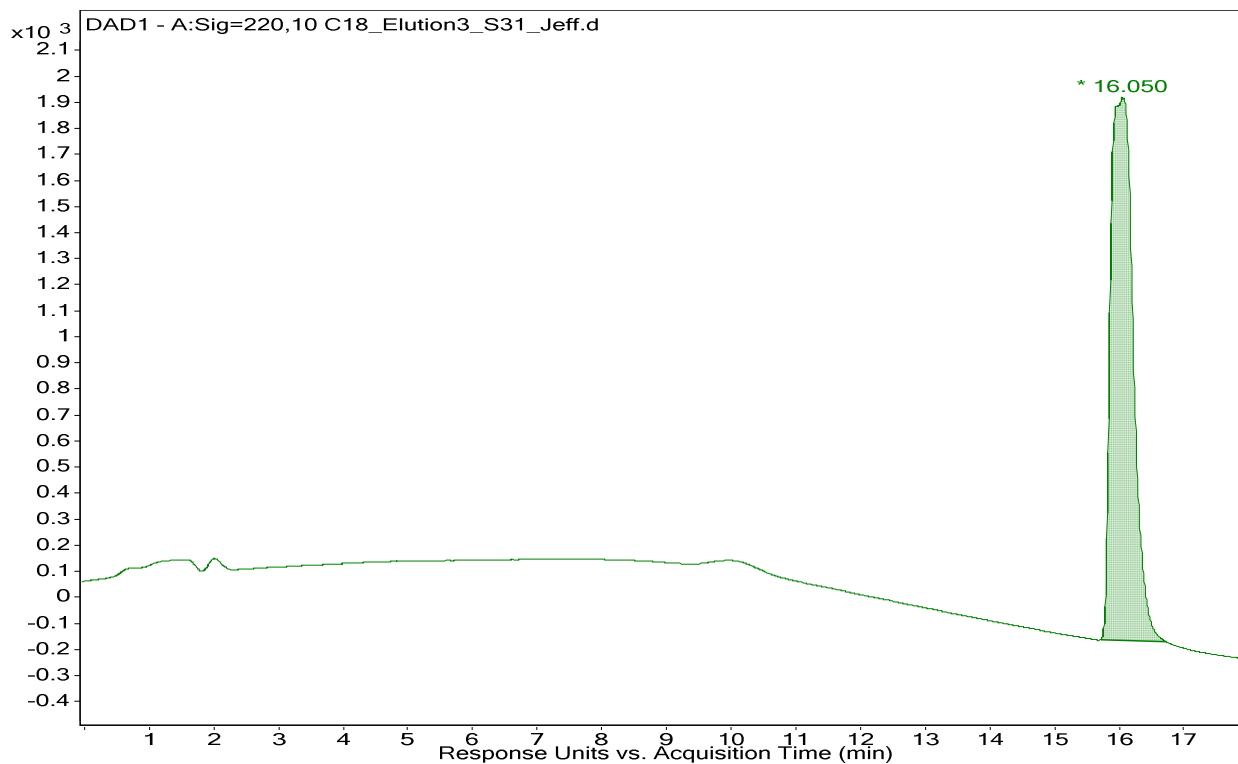

|               |                      |             |                      |                 |              |                        |                      |
|---------------|----------------------|-------------|----------------------|-----------------|--------------|------------------------|----------------------|
| Sample Name   | Jeff-31              | Position    | Vial 32              | Instrument Name | Instrument 1 | User Name              | DYL                  |
| Inj Vol       | 2                    | InjPosition |                      | SampleType      | Unknown      | IRM Calibration Status | Some Ions Missed     |
| Data Filename | C18_Elution3_S31_Jef | ACQ Method  | C18 waters symmetry3 | Comment         |              | Acquired Time          | 9/16/2012 3:48:07 AM |

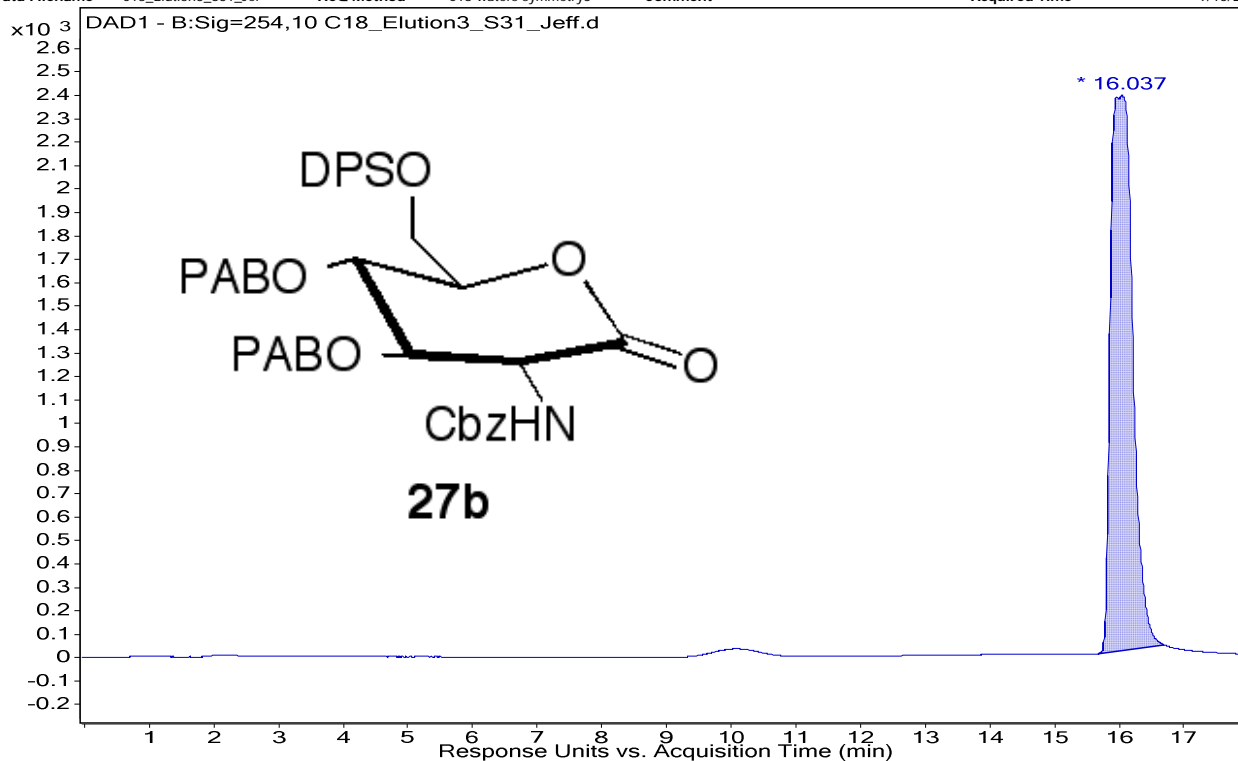

Analysis on a Waters SymmetryShield™ C18 (4.6 mm X 15 cm (i.d. x l.), 3.5 μm) at 0.5 mL/min. Solvent A: 50 mM NH<sub>4</sub>OAc (aq); B: CH<sub>3</sub>CN

| Time (min) | % B |
|------------|-----|
| 0          | 50  |
| 1          | 50  |
| 10         | 100 |
| 20         | 100 |

post CH3CN/H2O HPLC purification

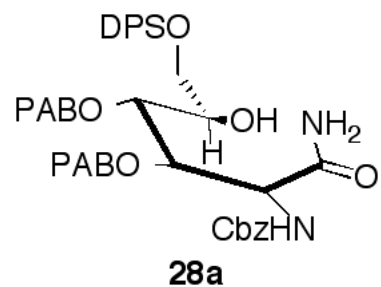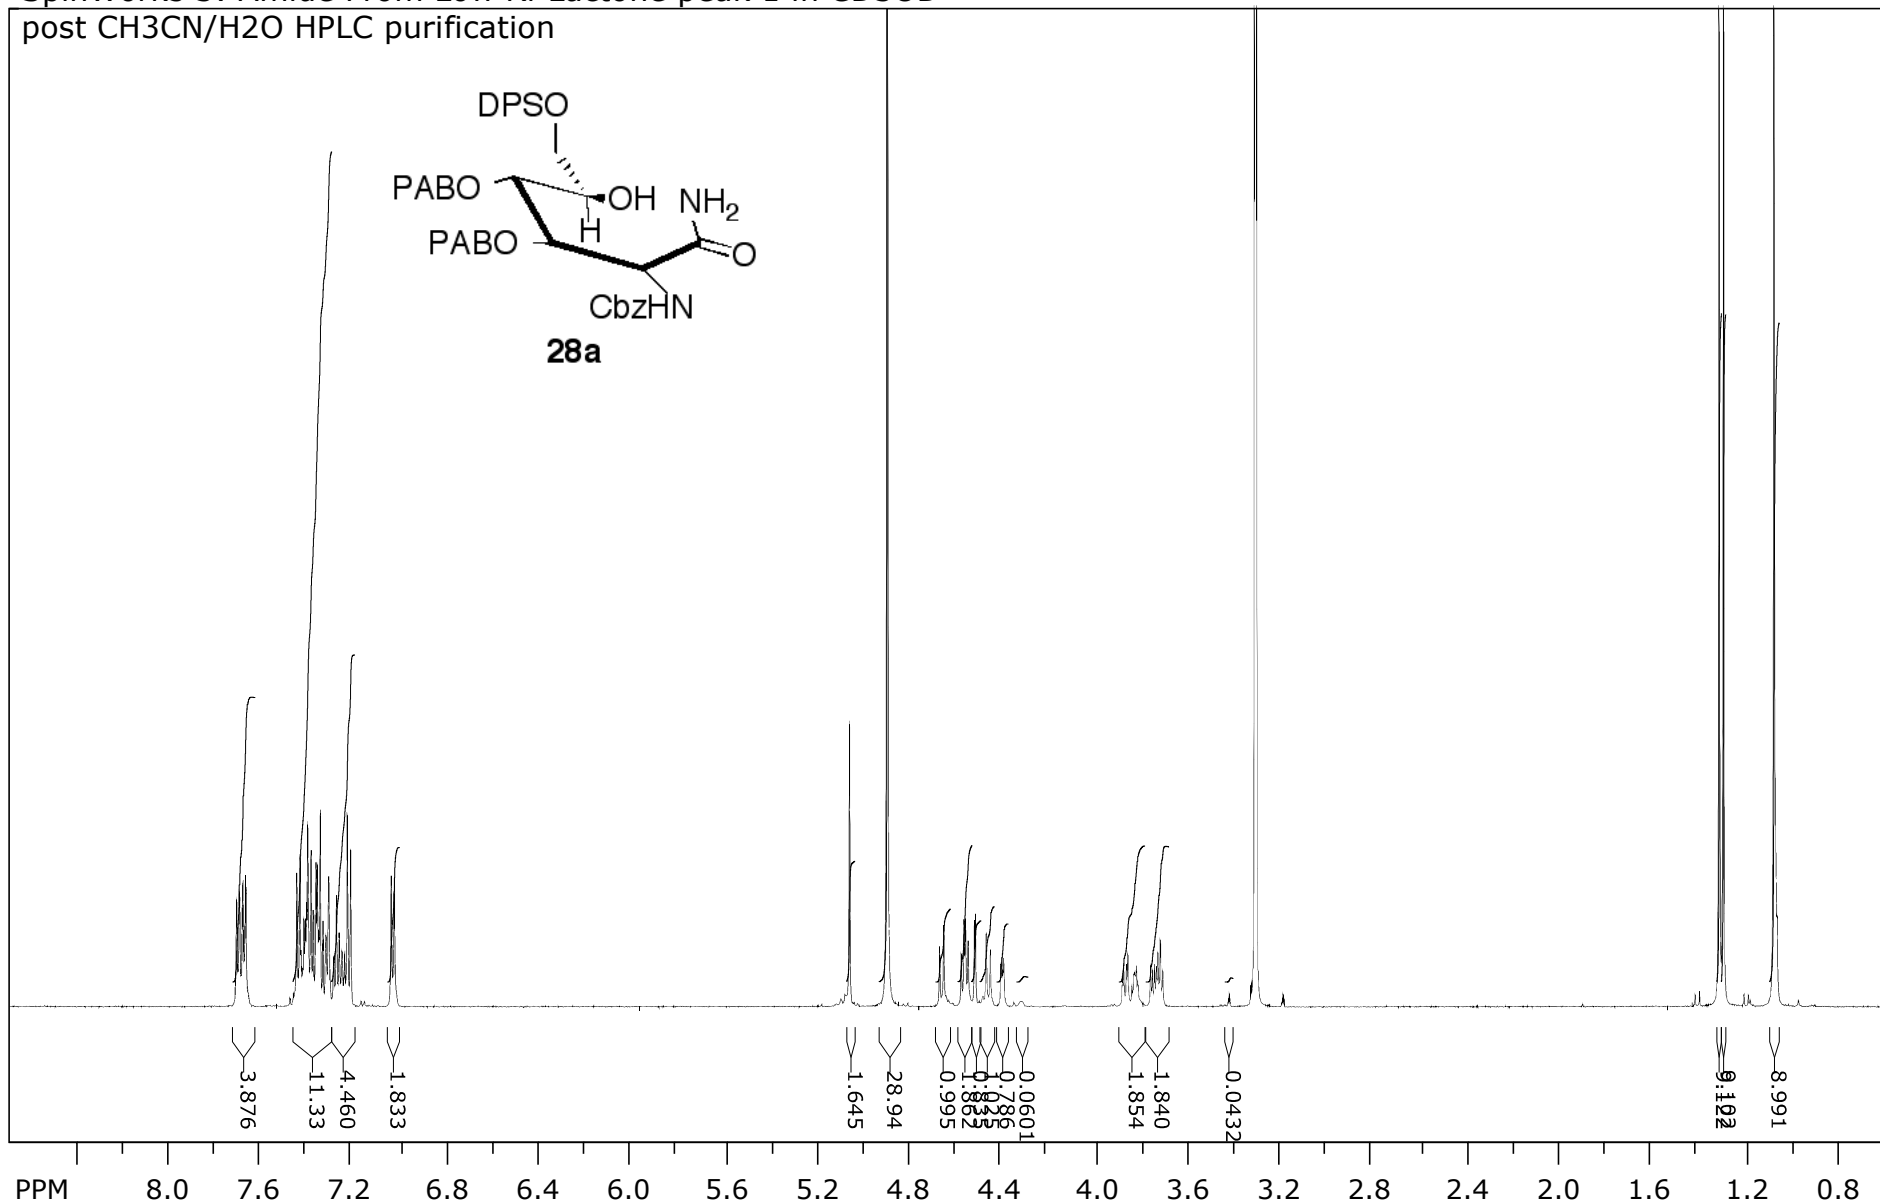

file: ...der\NMR Data\AmFrLoPk1\_CD3OD\1\fid expt: <zgpr>  
transmitter freq.: 600.553538 MHz  
time domain size: 65536 points  
width: 8417.51 Hz = 14.0162 ppm = 0.128441 Hz/pt  
number of scans: 32

freq. of 0 ppm: 600.550023 MHz  
processed size: 262144 complex points  
LB: 0.000 GF: 0.0000  
Hz/cm: 195.683 ppm/cm: 0.32584

post CH3CN/H2O HPLC purification

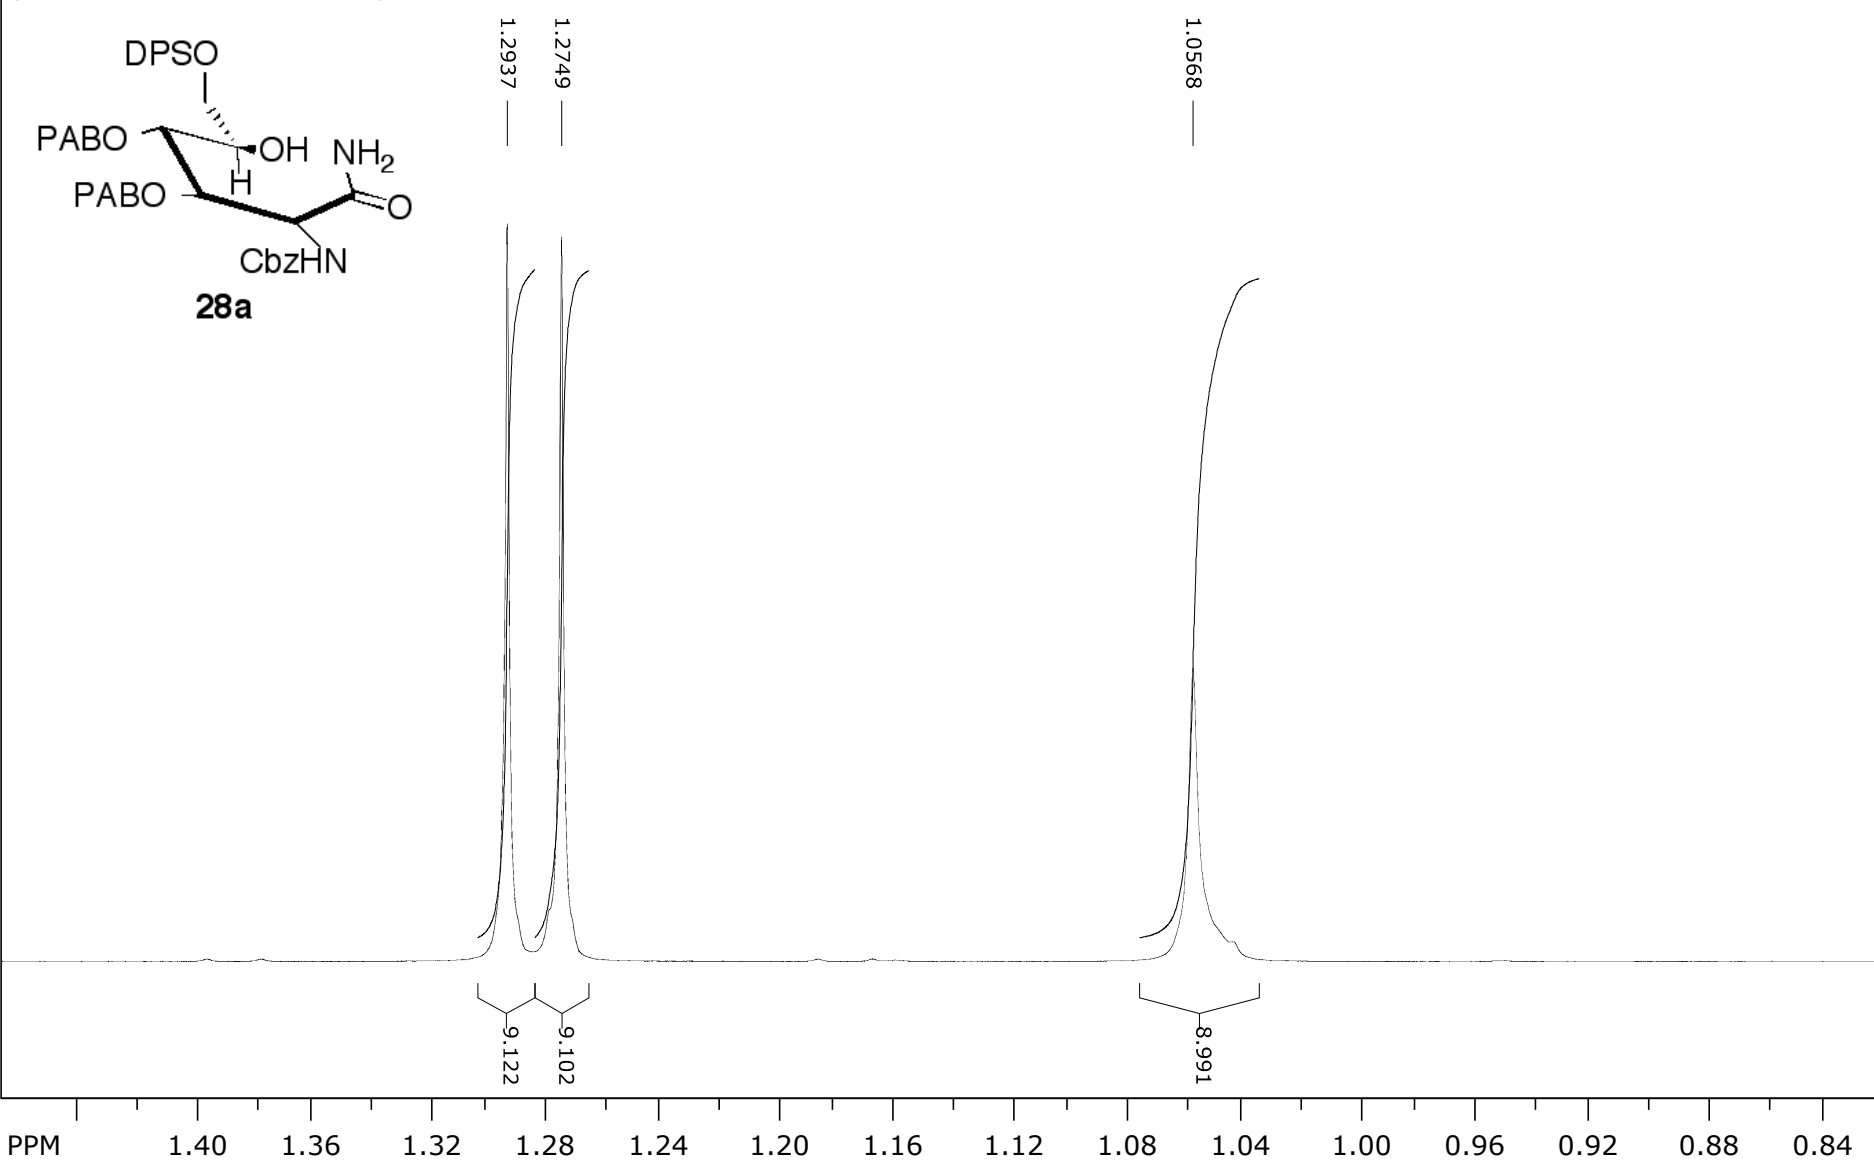

file: ...der\NMR Data\AmFrLoPk1\_CD3OD\1\fid expt: <zgpr>  
transmitter freq.: 600.553538 MHz  
time domain size: 65536 points  
width: 8417.51 Hz = 14.0162 ppm = 0.128441 Hz/pt  
number of scans: 32

freq. of 0 ppm: 600.550023 MHz  
processed size: 262144 complex points  
LB: 0.000 GF: 0.0000  
Hz/cm: 15.616 ppm/cm: 0.02600

post CH3CN/H2O HPLC purification

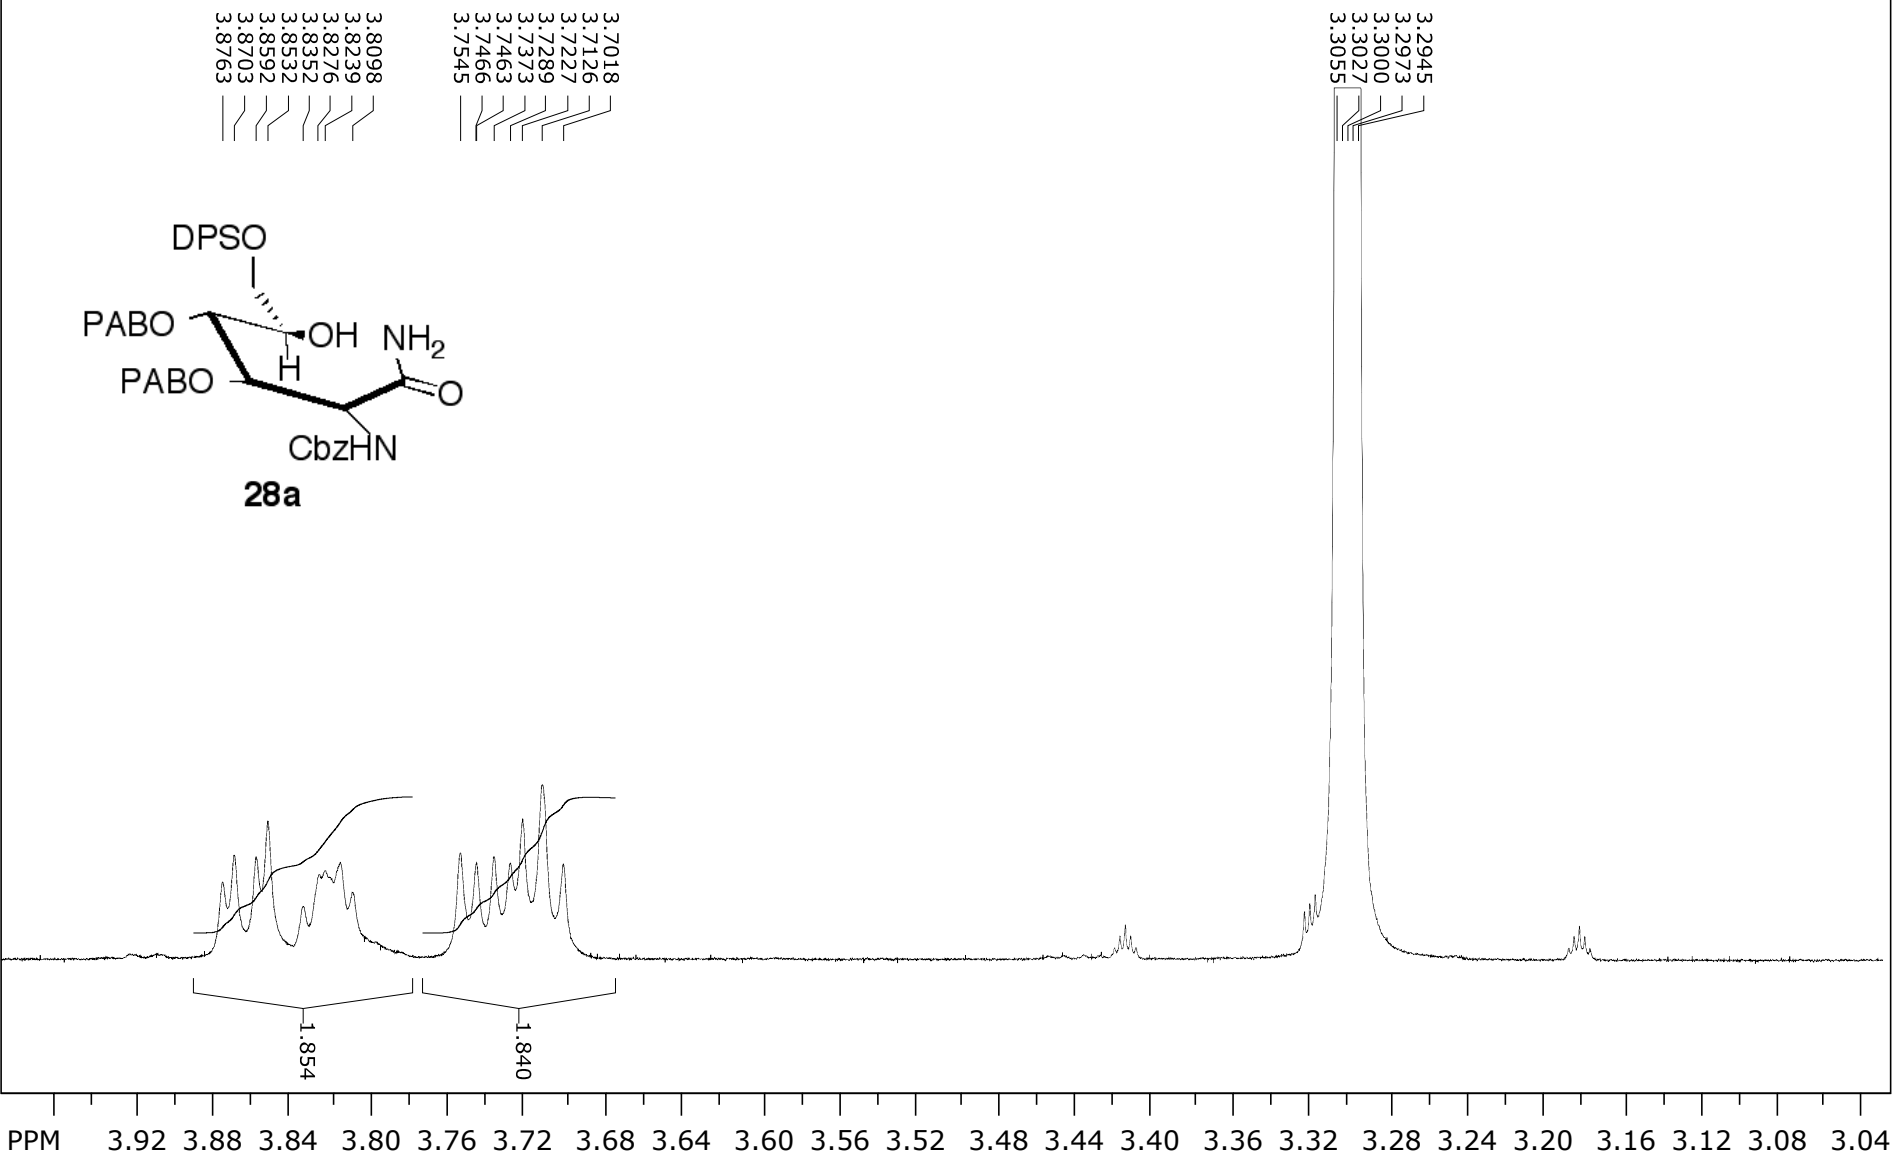

file: ...der\NMR Data\AmFrLoPk1\_CD3OD\1\fid expt: <zgpr>  
 transmitter freq.: 600.553538 MHz  
 time domain size: 65536 points  
 width: 8417.51 Hz = 14.0162 ppm = 0.128441 Hz/pt  
 number of scans: 32

freq. of 0 ppm: 600.550023 MHz  
 processed size: 262144 complex points  
 LB: 0.000 GF: 0.0000  
 Hz/cm: 23.163 ppm/cm: 0.03857

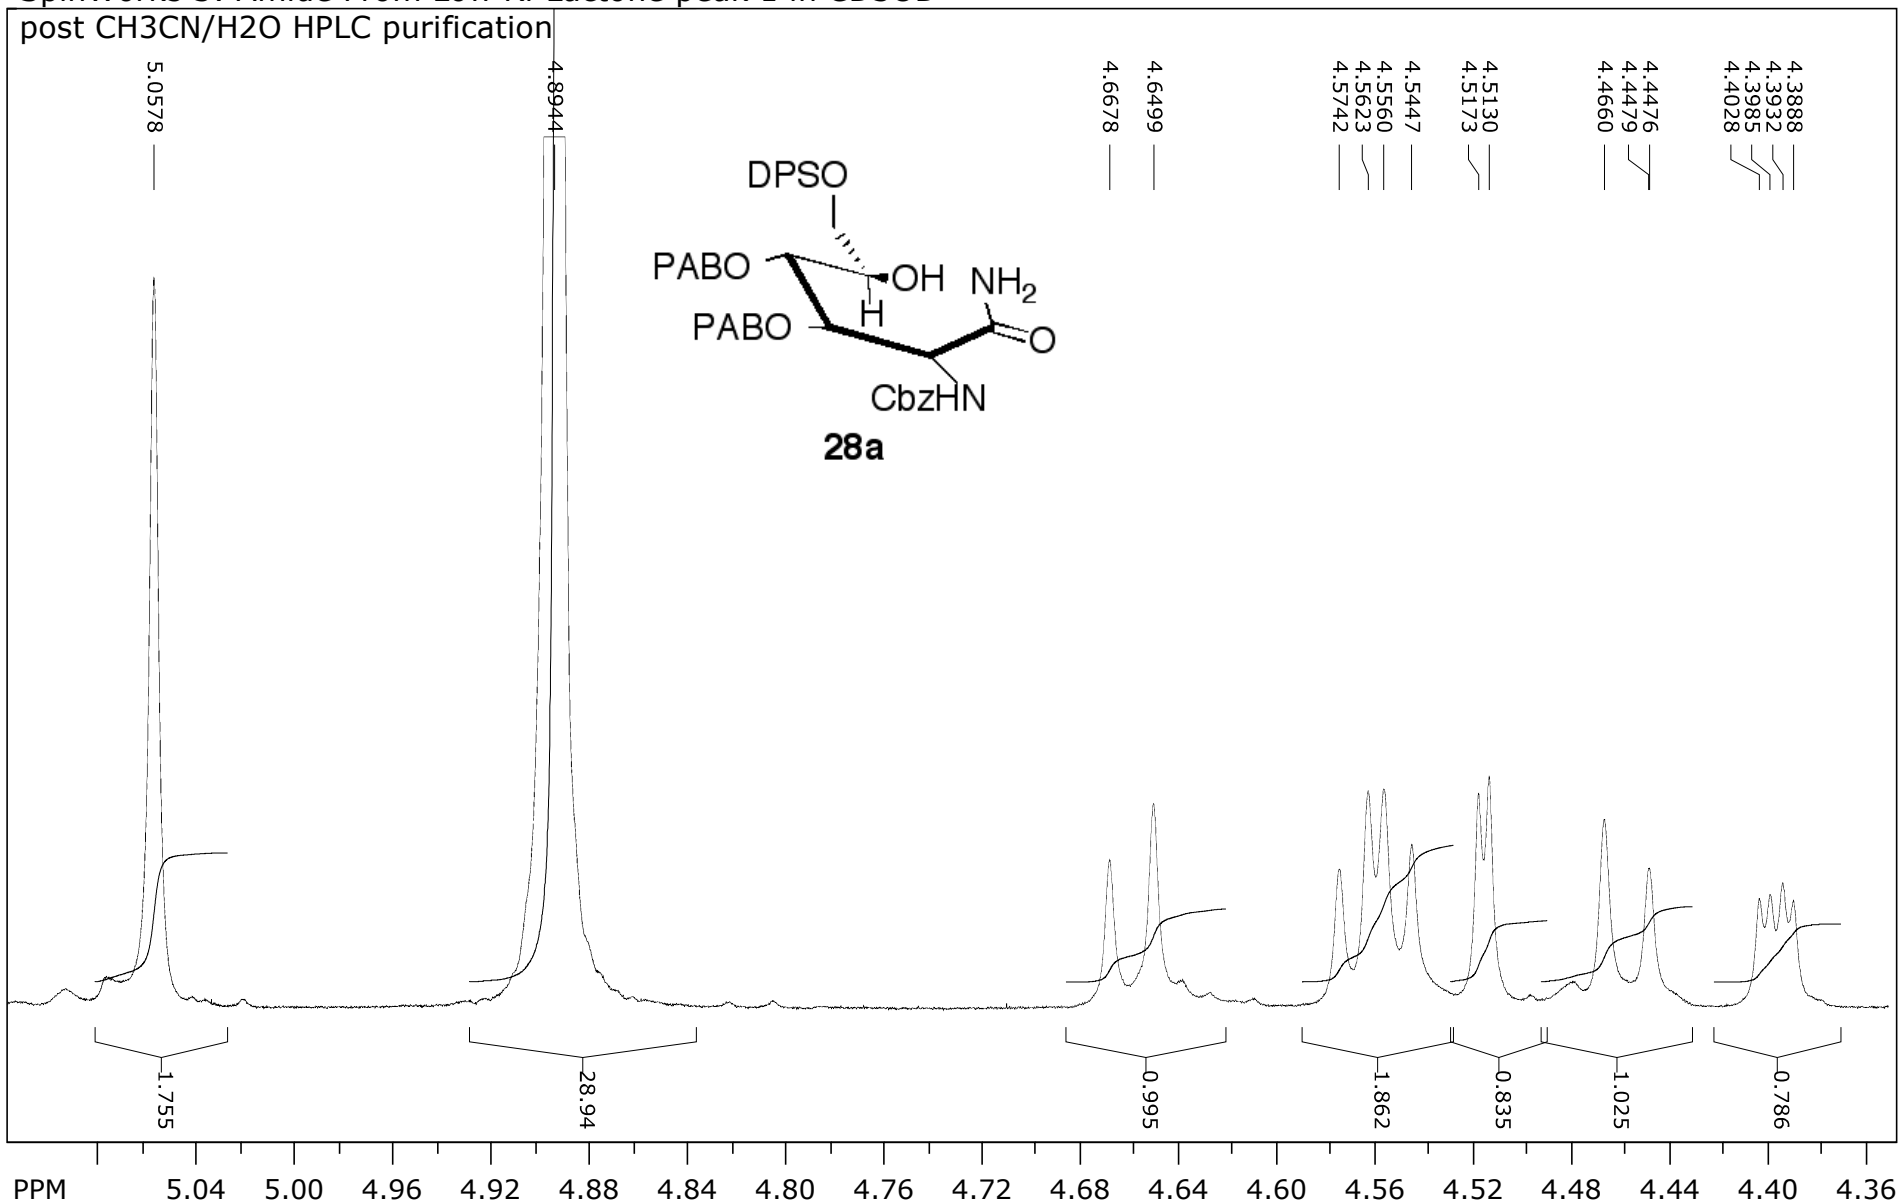

file: ...der\NMR Data\AmFrLoPk1\_CD3OD\1\fid expt: <zgpr>  
transmitter freq.: 600.553538 MHz  
time domain size: 65536 points  
width: 8417.51 Hz = 14.0162 ppm = 0.128441 Hz/pt  
number of scans: 32

freq. of 0 ppm: 600.550023 MHz  
processed size: 262144 complex points  
LB: 0.000 GF: 0.0000  
Hz/cm: 18.448 ppm/cm: 0.03072



post CH3CN/H2O HPLC purification

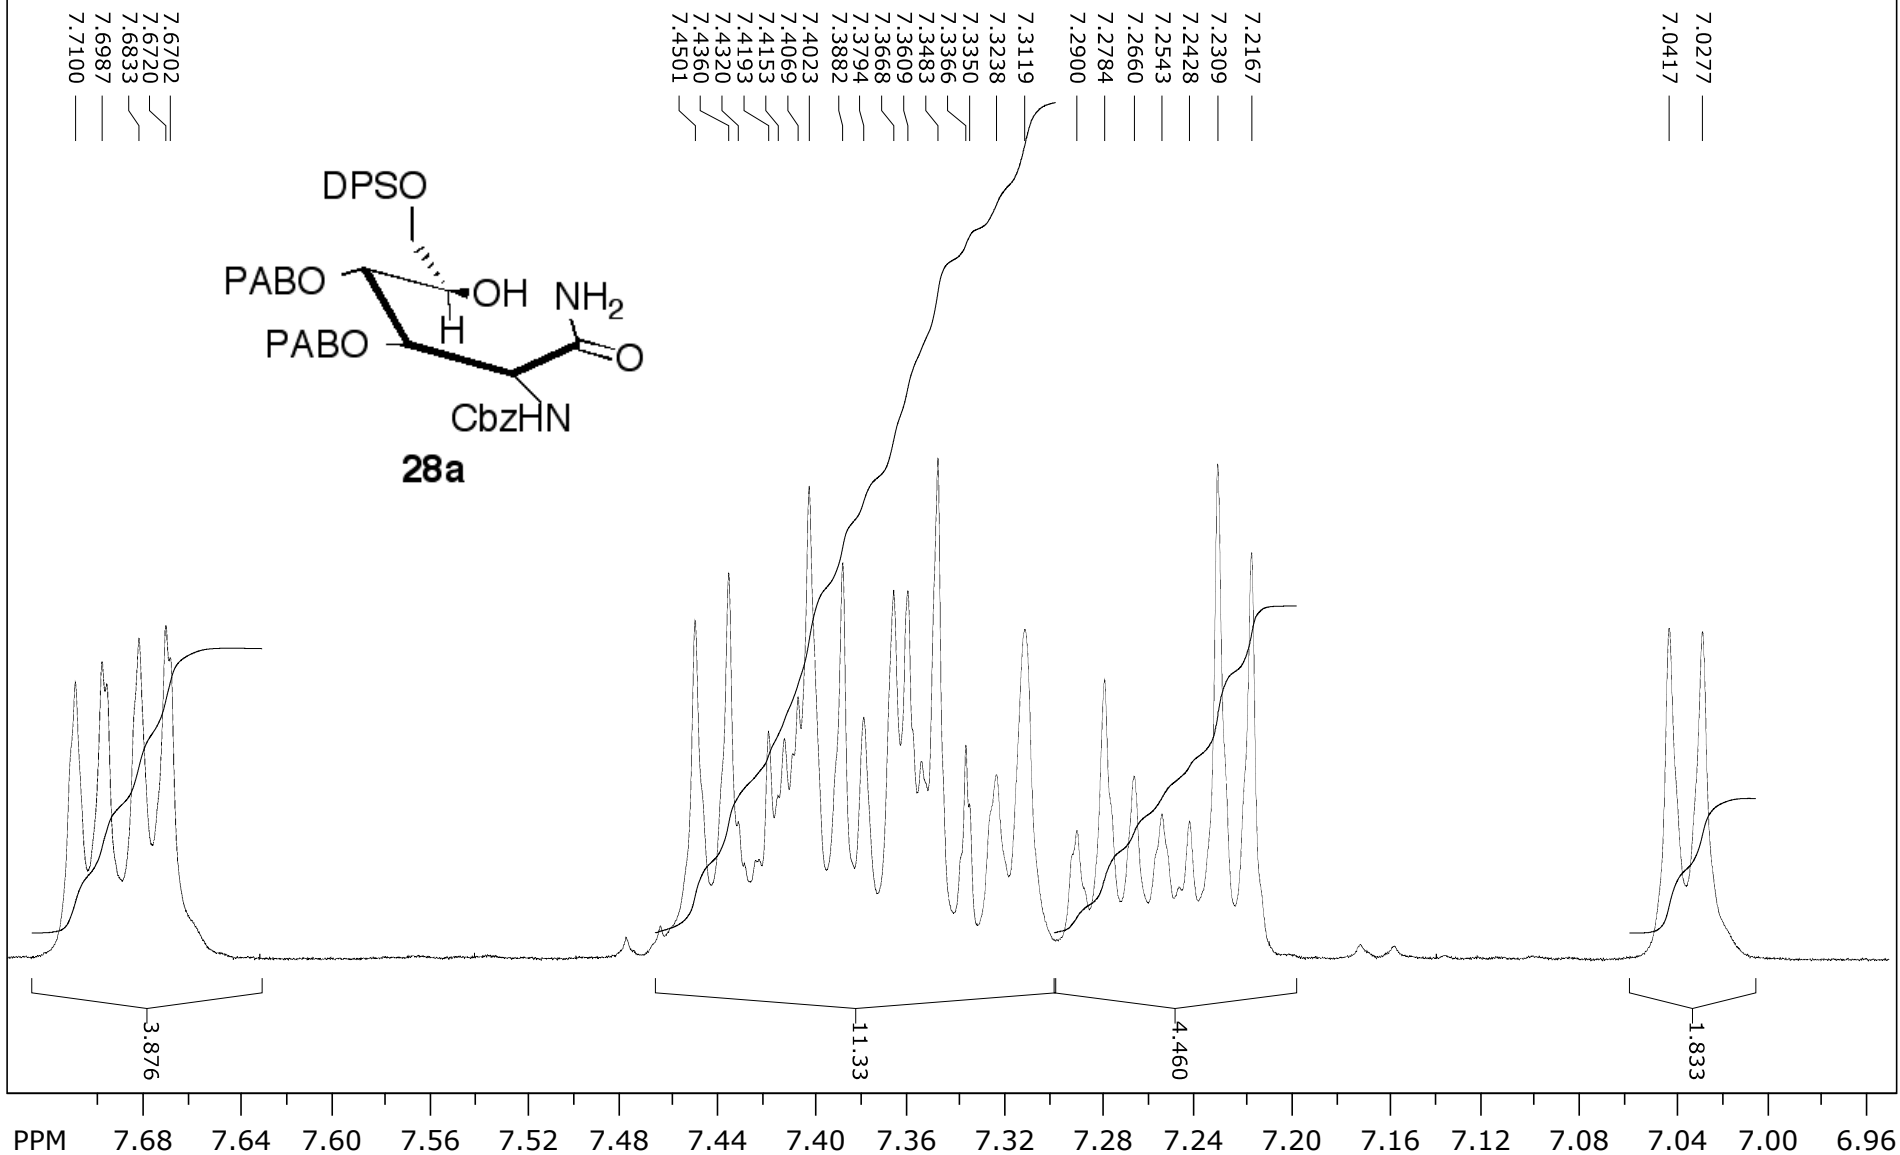

file: ...der\NMR Data\AmFrLoPk1\_CD3OD\1\fid expt: <zgpr>  
 transmitter freq.: 600.553538 MHz  
 time domain size: 65536 points  
 width: 8417.51 Hz = 14.0162 ppm = 0.128441 Hz/pt  
 number of scans: 32

freq. of 0 ppm: 600.550023 MHz  
 processed size: 262144 complex points  
 LB: 0.000 GF: 0.0000  
 Hz/cm: 18.958 ppm/cm: 0.03157

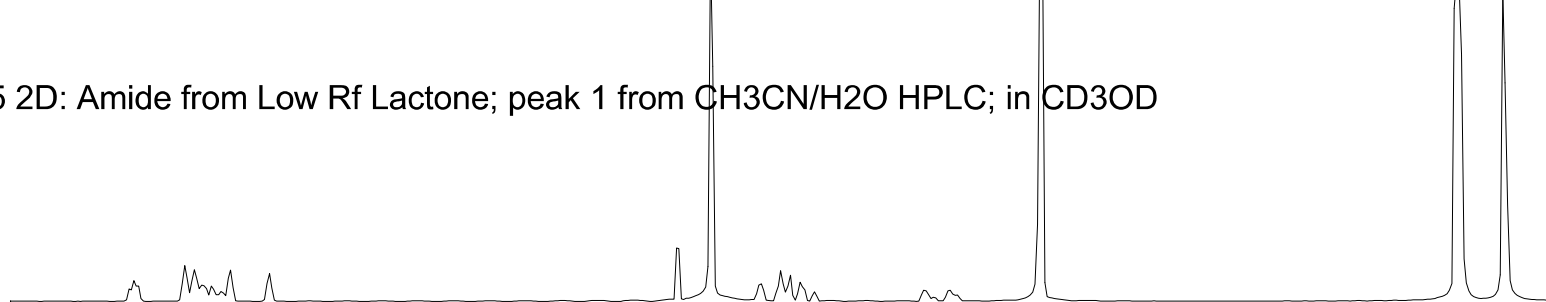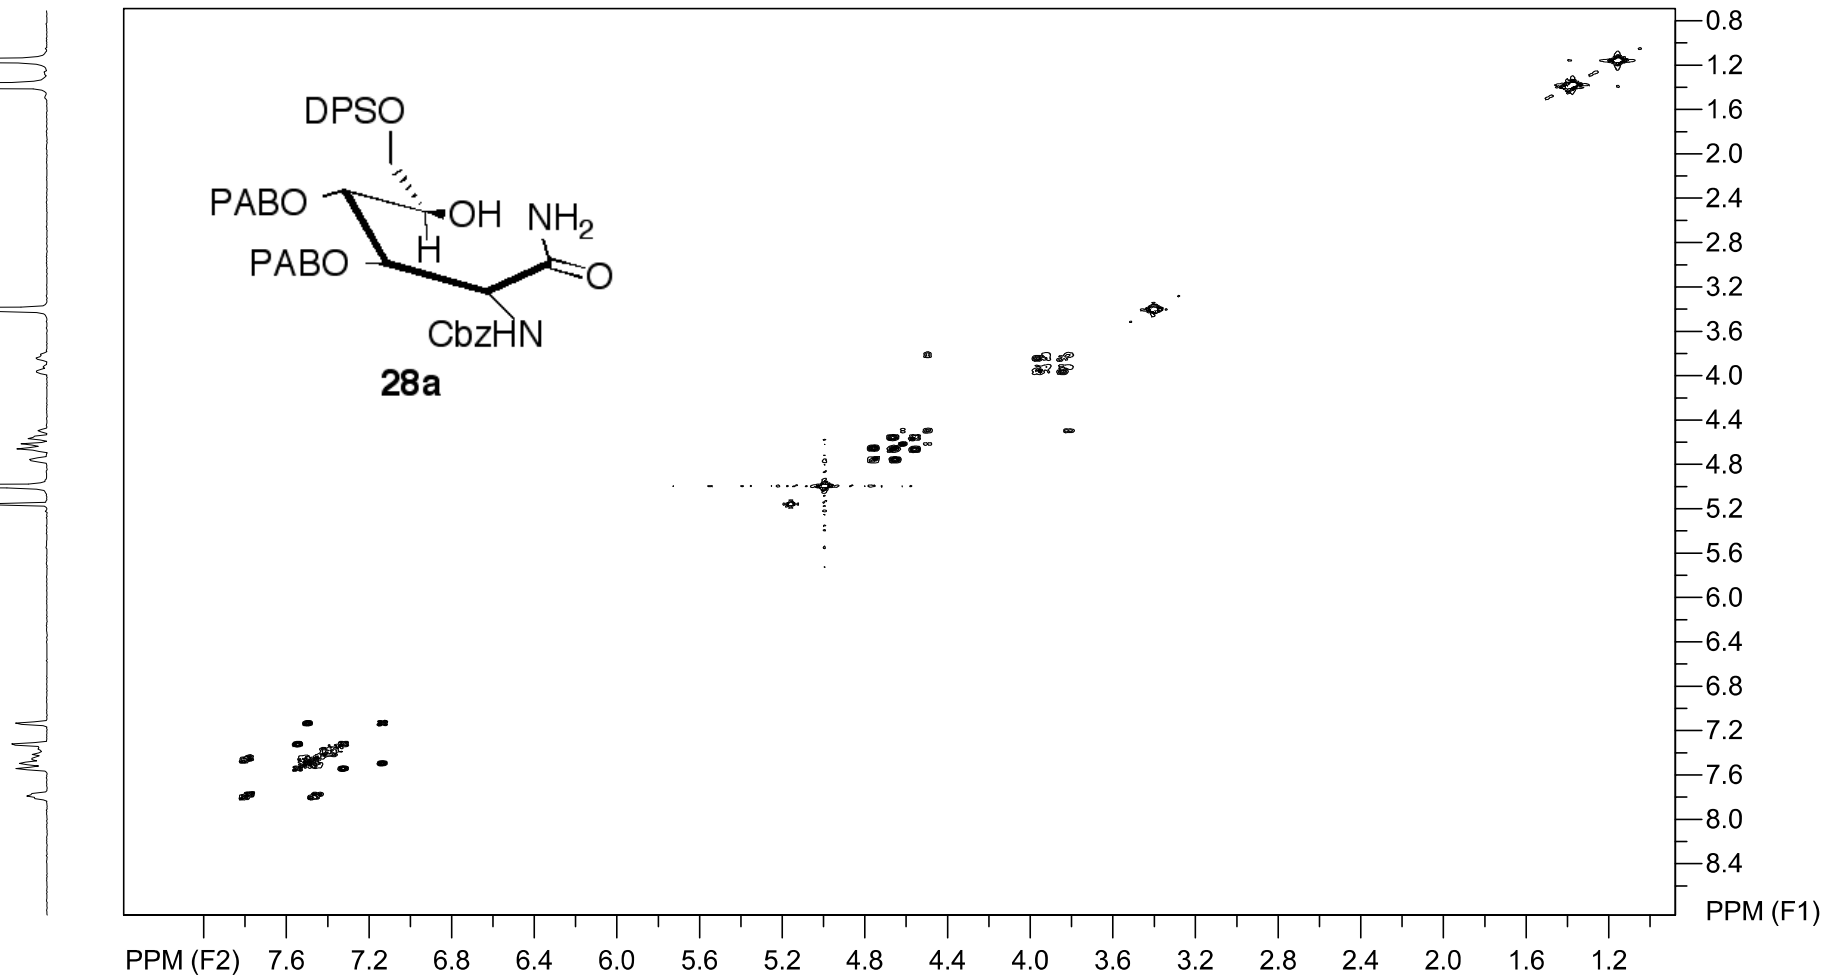

file: C:\Users\Jeff\Documents\NMR Folder\NMR Data\AmFrLoPk1COSY\1\ser exp: <cosygpqf>  
 transmitter freq.: 600.552832 MHz  
 time domain size: 2048 by 1024 points  
 width (F2): 7211.50 Hz = 12.008167 ppm = 3.521242 Hz/pt  
 number of scans: 2

F2: freq. of 0 ppm: 600.549962 MHz  
 processed size: 1024 complex points  
 window function: Sine  
 shift: 0.0 degrees  
 Hz/cm: 220.000 ppm/cm: 0.36633

F1: freq. of 0 ppm: 600.549962 MHz  
 processed size: 1024 complex points  
 window function: Sine  
 shift: 0.0 degrees  
 Hz/cm: 409.149 ppm/cm: 0.68129

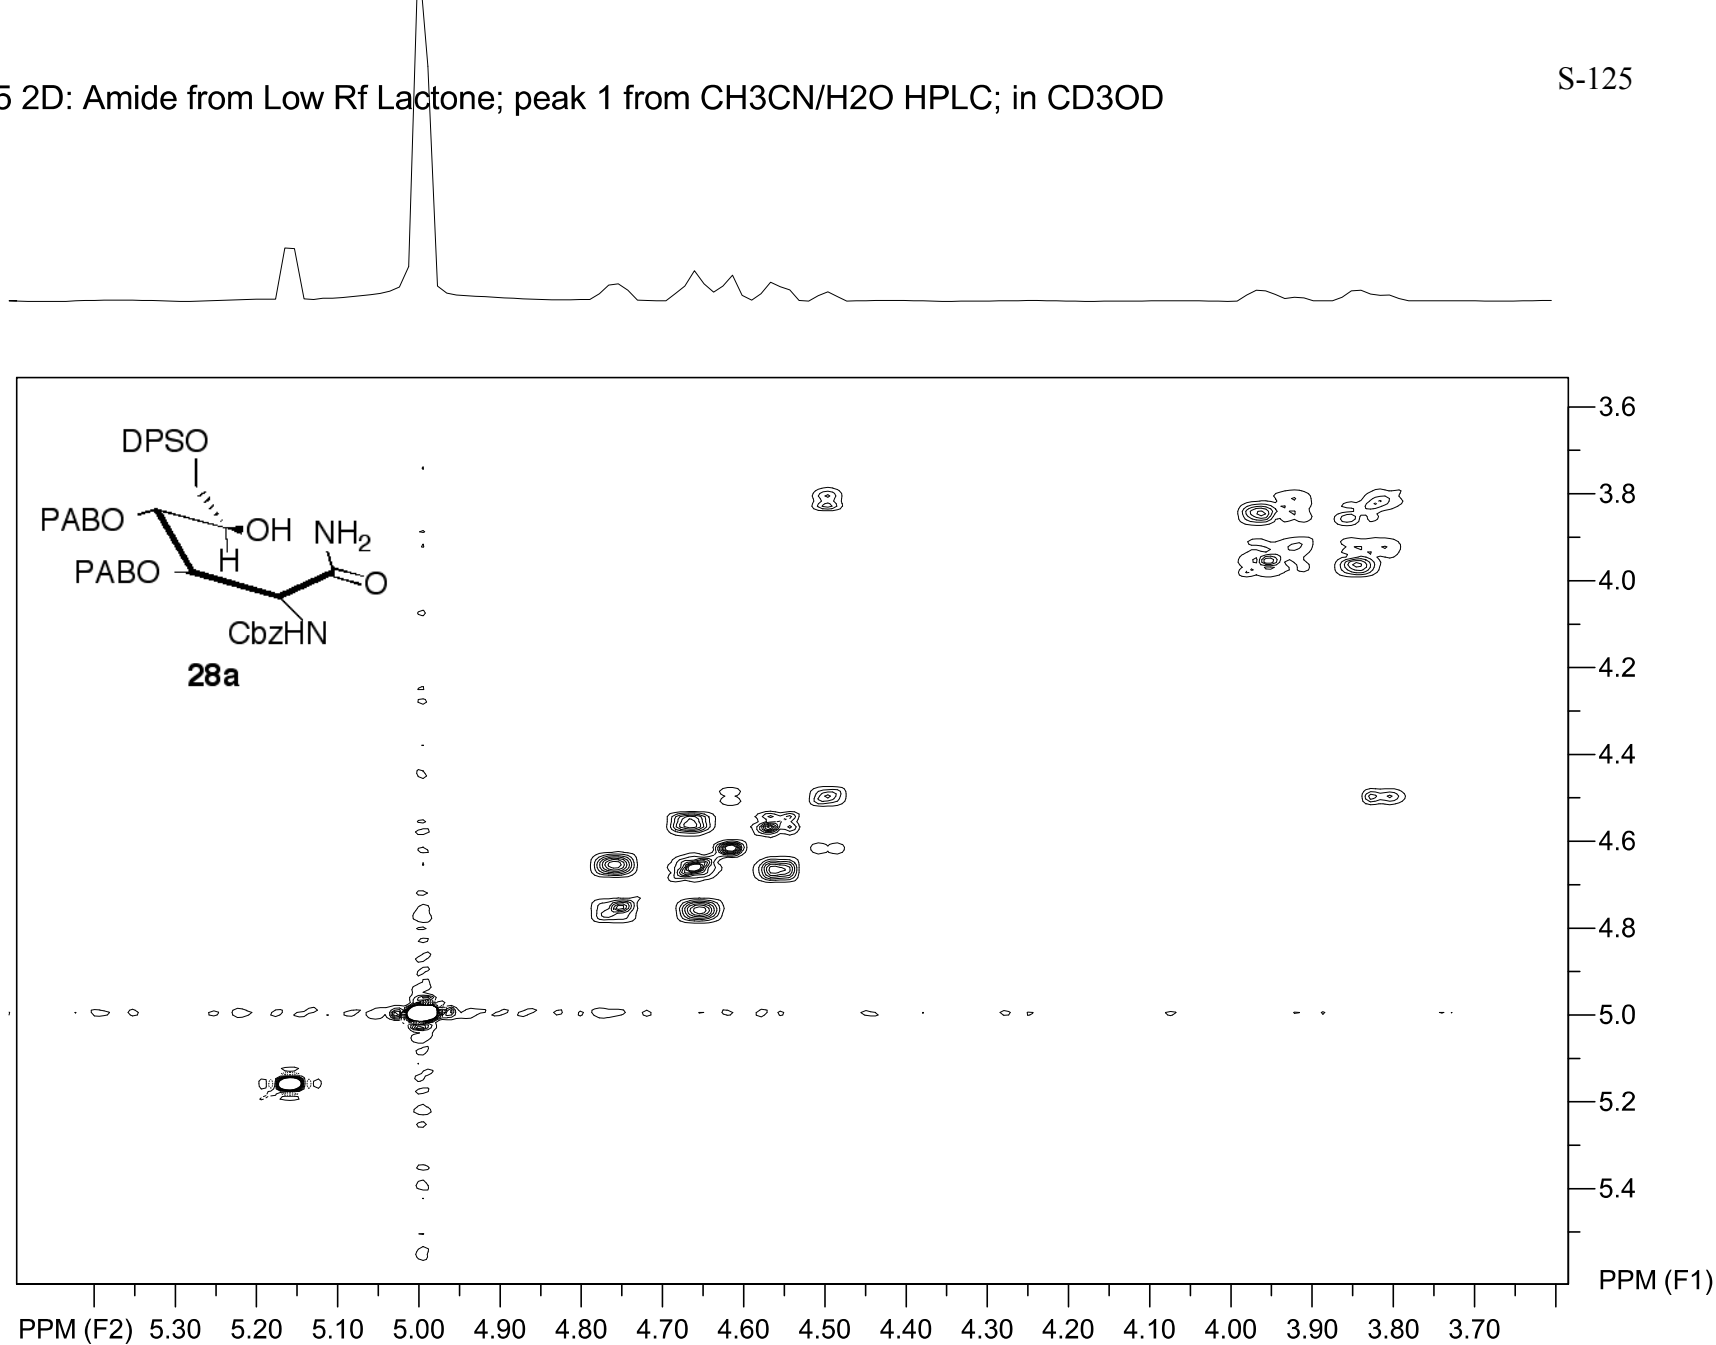

file: C:\Users\Jeff\Documents\NMR Folder\NMR Data\AmFrLoPk1COSY\1\ser exp: <cosygpqf>  
transmitter freq.: 600.552832 MHz  
time domain size: 2048 by 1024 points  
width (F2): 7211.50 Hz = 12.008167 ppm = 3.521242 Hz/pt  
number of scans: 2

F2: freq. of 0 ppm: 600.549962 MHz  
processed size: 1024 complex points  
window function: Sine  
shift: 0.0 degrees  
Hz/cm: 55.980 ppm/cm: 0.09321

F1: freq. of 0 ppm: 600.549962 MHz  
processed size: 1024 complex points  
window function: Sine  
shift: 0.0 degrees  
Hz/cm: 104.482 ppm/cm: 0.17398

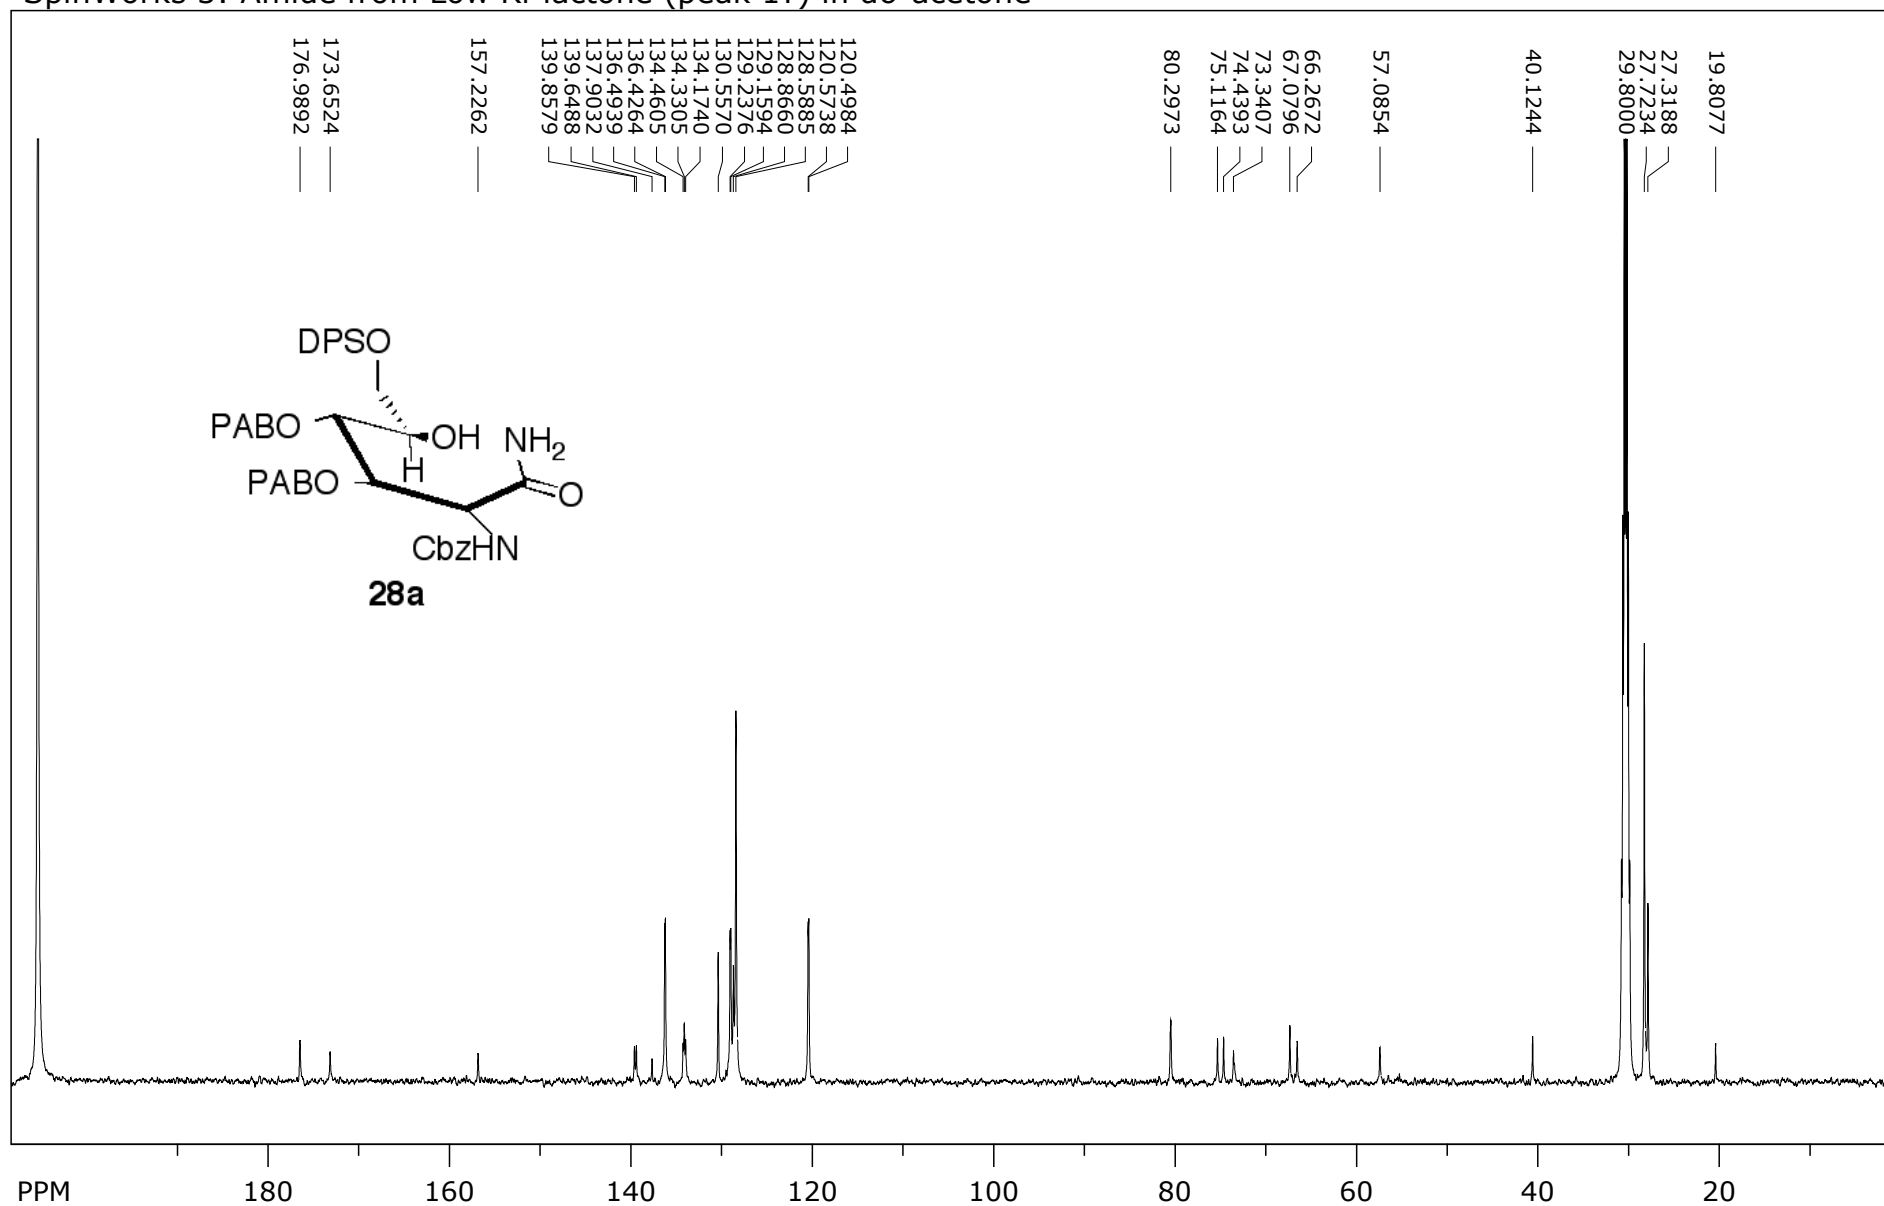

file: ...m lowRf lactone in d6acetone\2\fid expt: <zgpg>  
transmitter freq.: 125.699901 MHz  
time domain size: 65536 points  
width: 27777.78 Hz = 220.9849 ppm = 0.423855 Hz/pt  
number of scans: 2800

freq. of 0 ppm: 125.687276 MHz  
processed size: 32768 complex points  
LB: 10.000 GF: 0.0000  
Hz/cm: 1050.698 ppm/cm: 8.35878

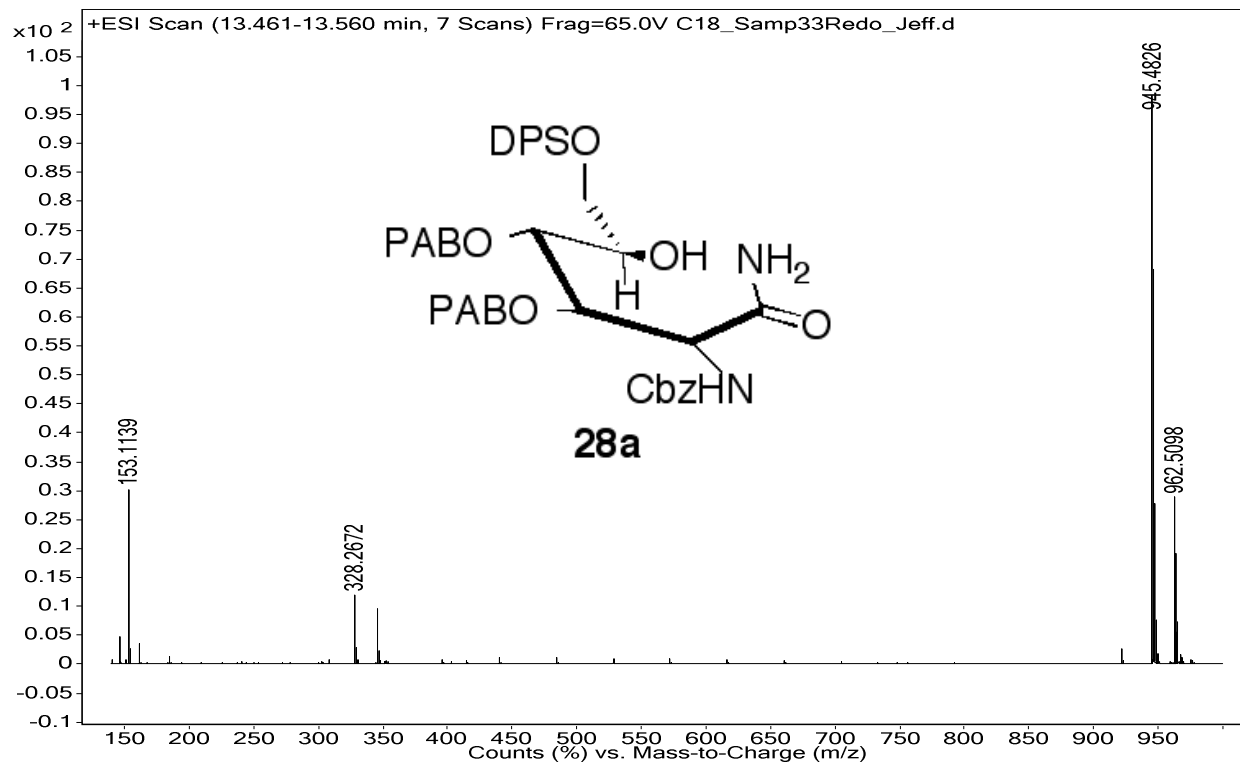

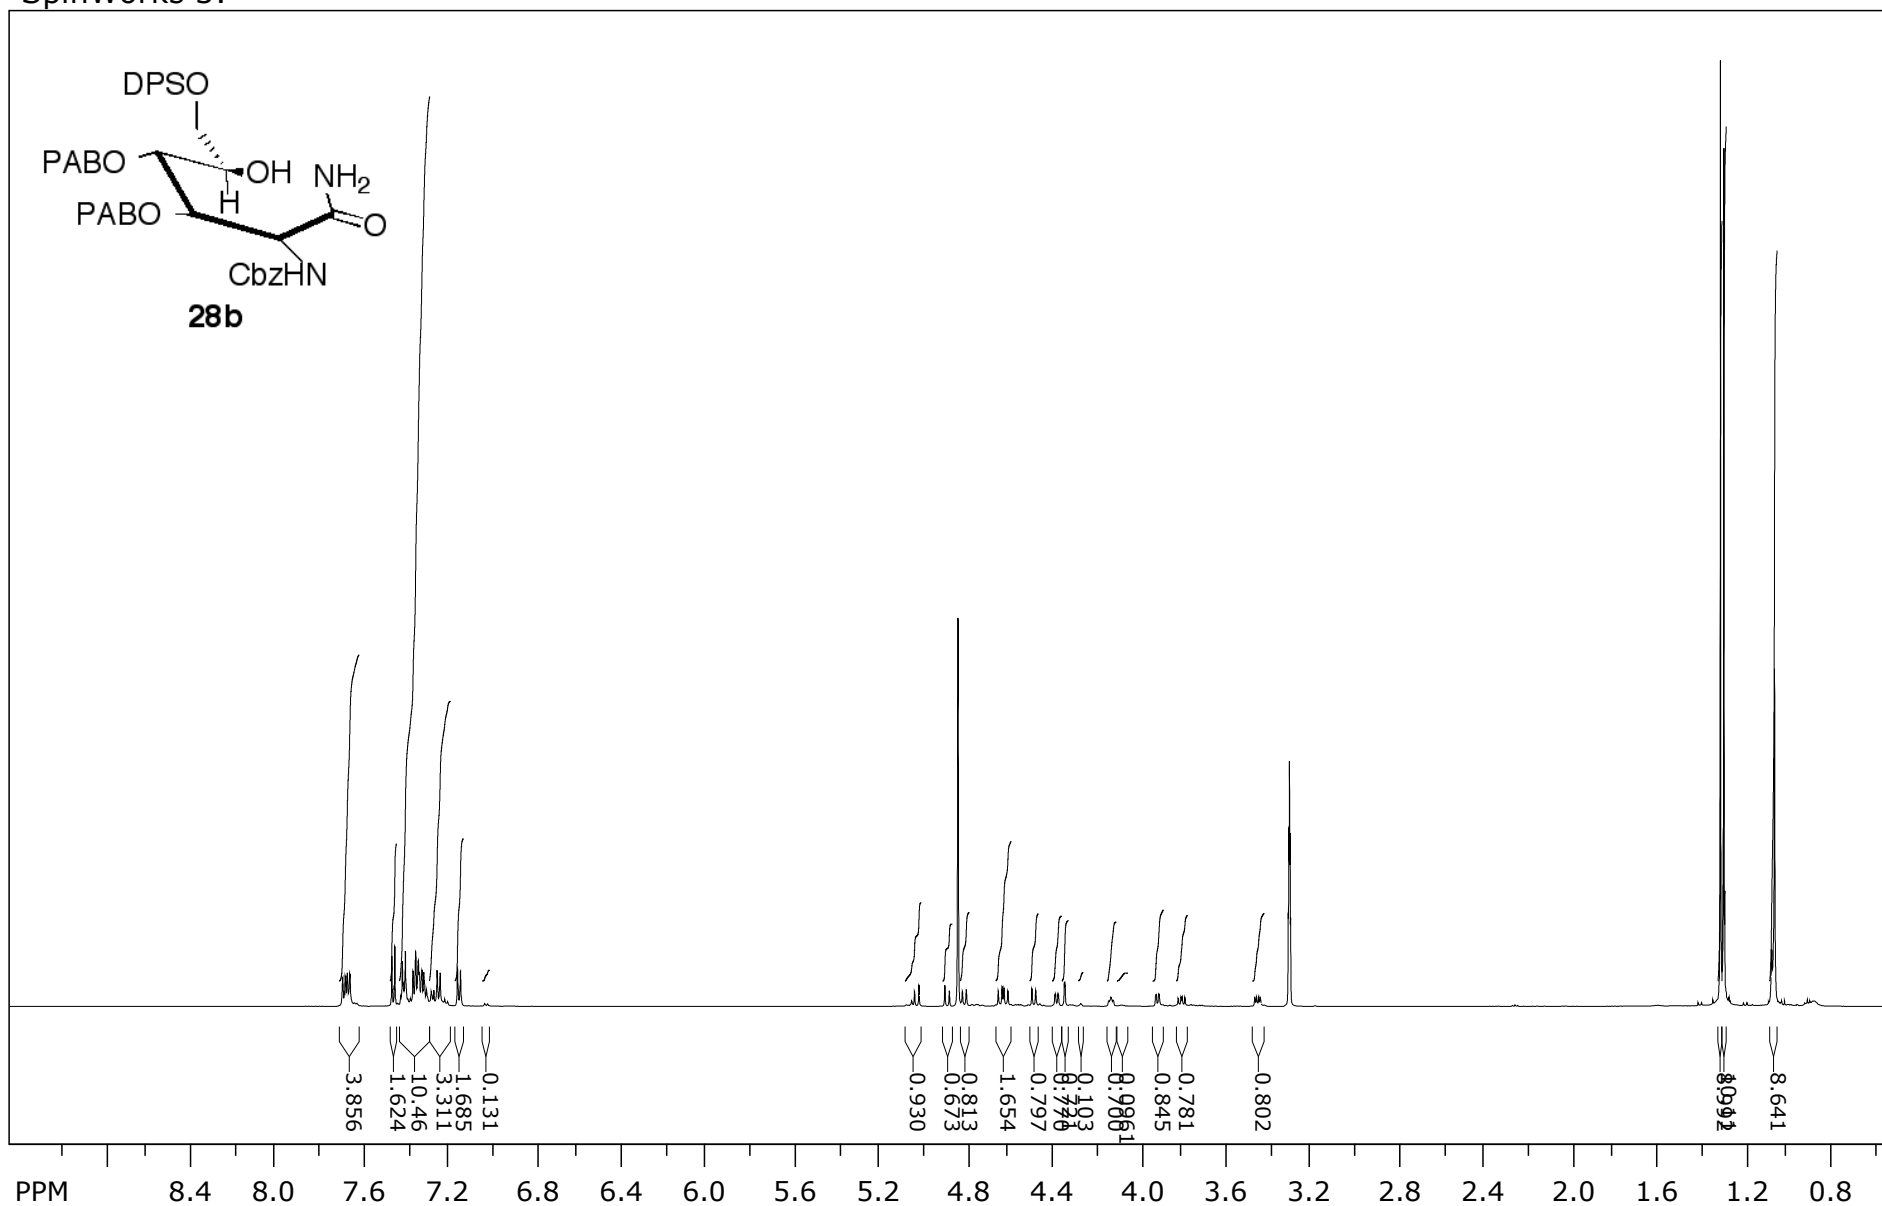

file: ...\\NMR Data\\mostPolAmide\_CD3OD\\1\\fid expt: <zgpr>  
transmitter freq.: 600.553538 MHz  
time domain size: 65536 points  
width: 8417.51 Hz = 14.0162 ppm = 0.128441 Hz/pt  
number of scans: 32

freq. of 0 ppm: 600.550023 MHz  
processed size: 262144 complex points  
LB: 0.000 GF: 0.0000  
Hz/cm: 210.335 ppm/cm: 0.35023

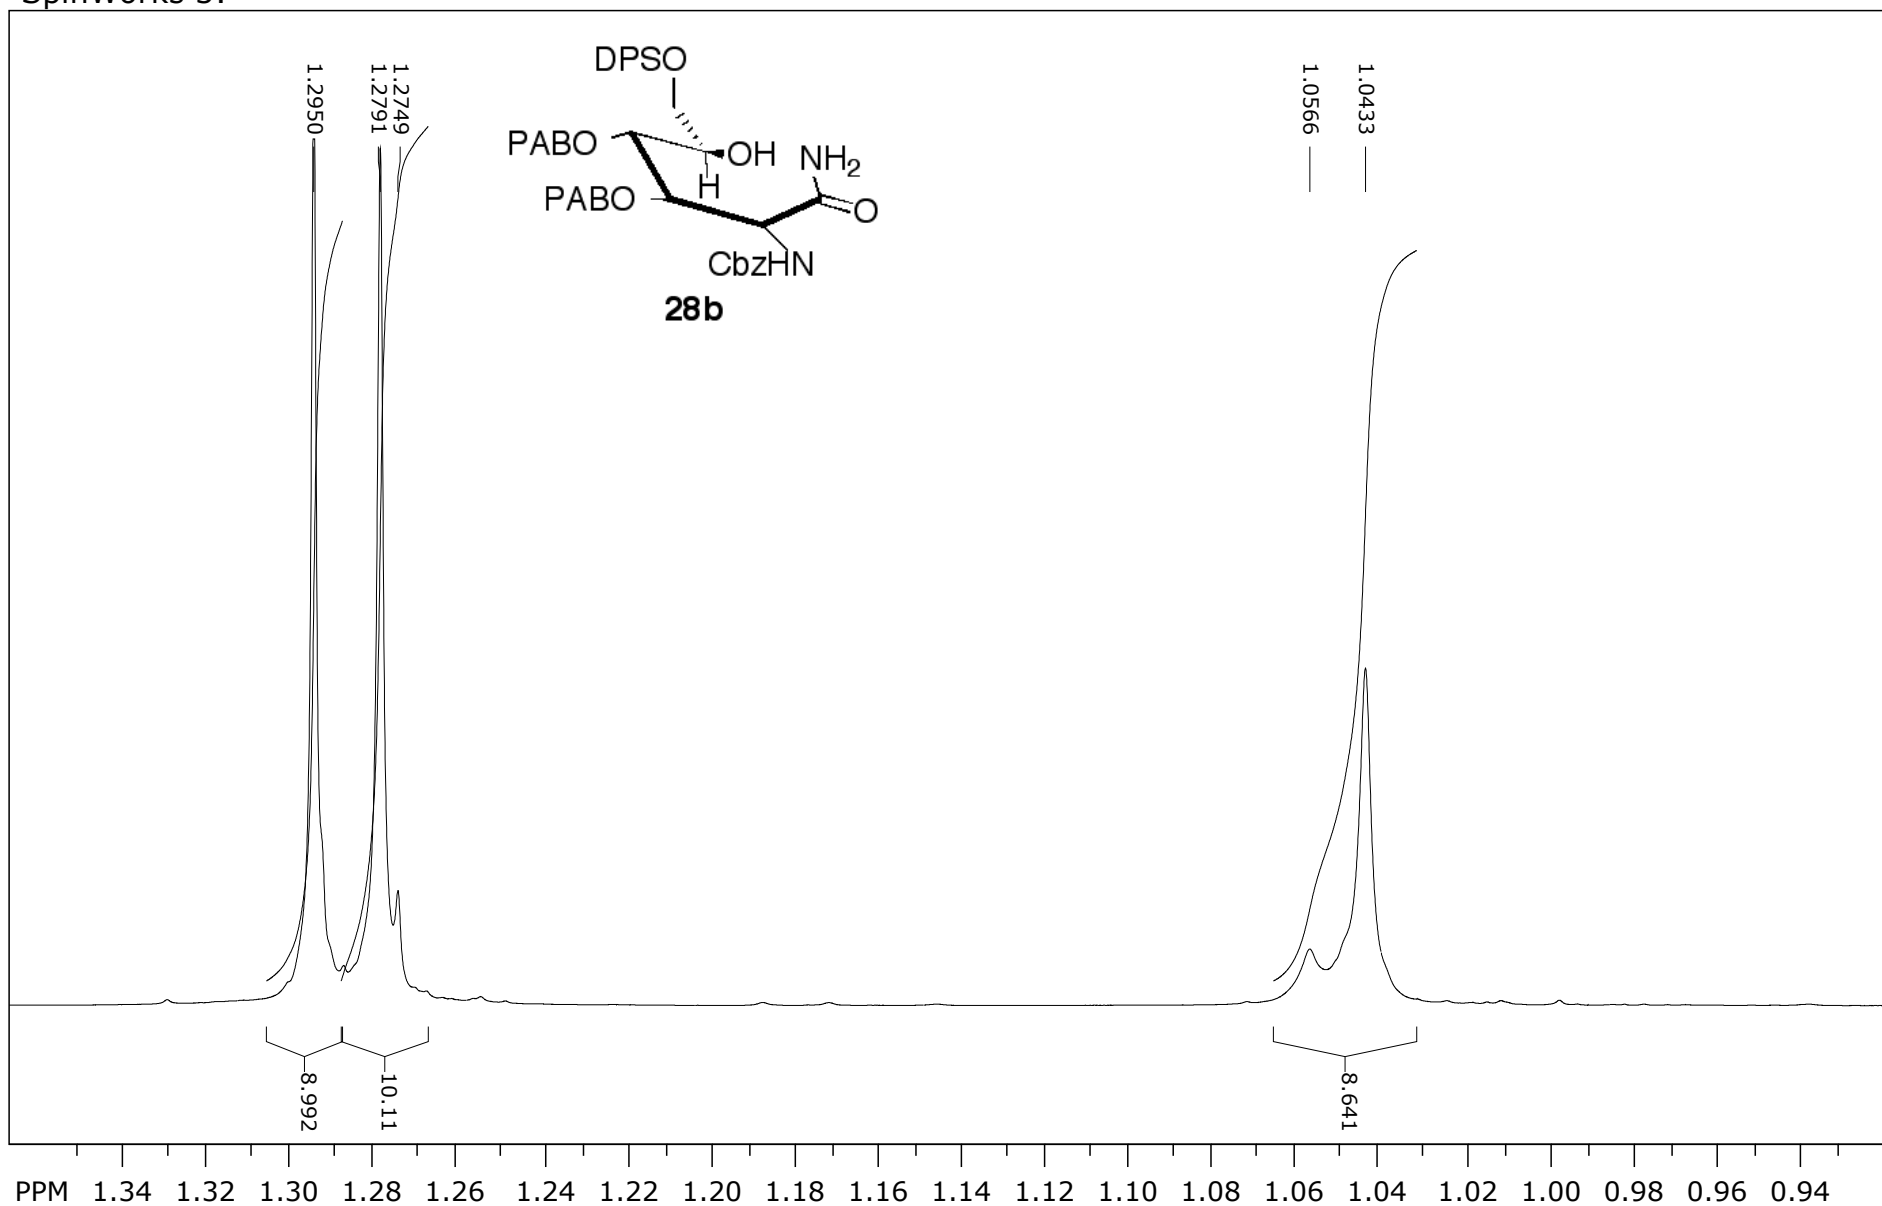

file: ...\\NMR Data\\mostPolAmide\_CD3OD\\1\\fid expt: <zgpr>  
transmitter freq.: 600.553538 MHz  
time domain size: 65536 points  
width: 8417.51 Hz = 14.0162 ppm = 0.128441 Hz/pt  
number of scans: 32

freq. of 0 ppm: 600.550023 MHz  
processed size: 262144 complex points  
LB: 0.000 GF: 0.0000  
Hz/cm: 10.825 ppm/cm: 0.01803

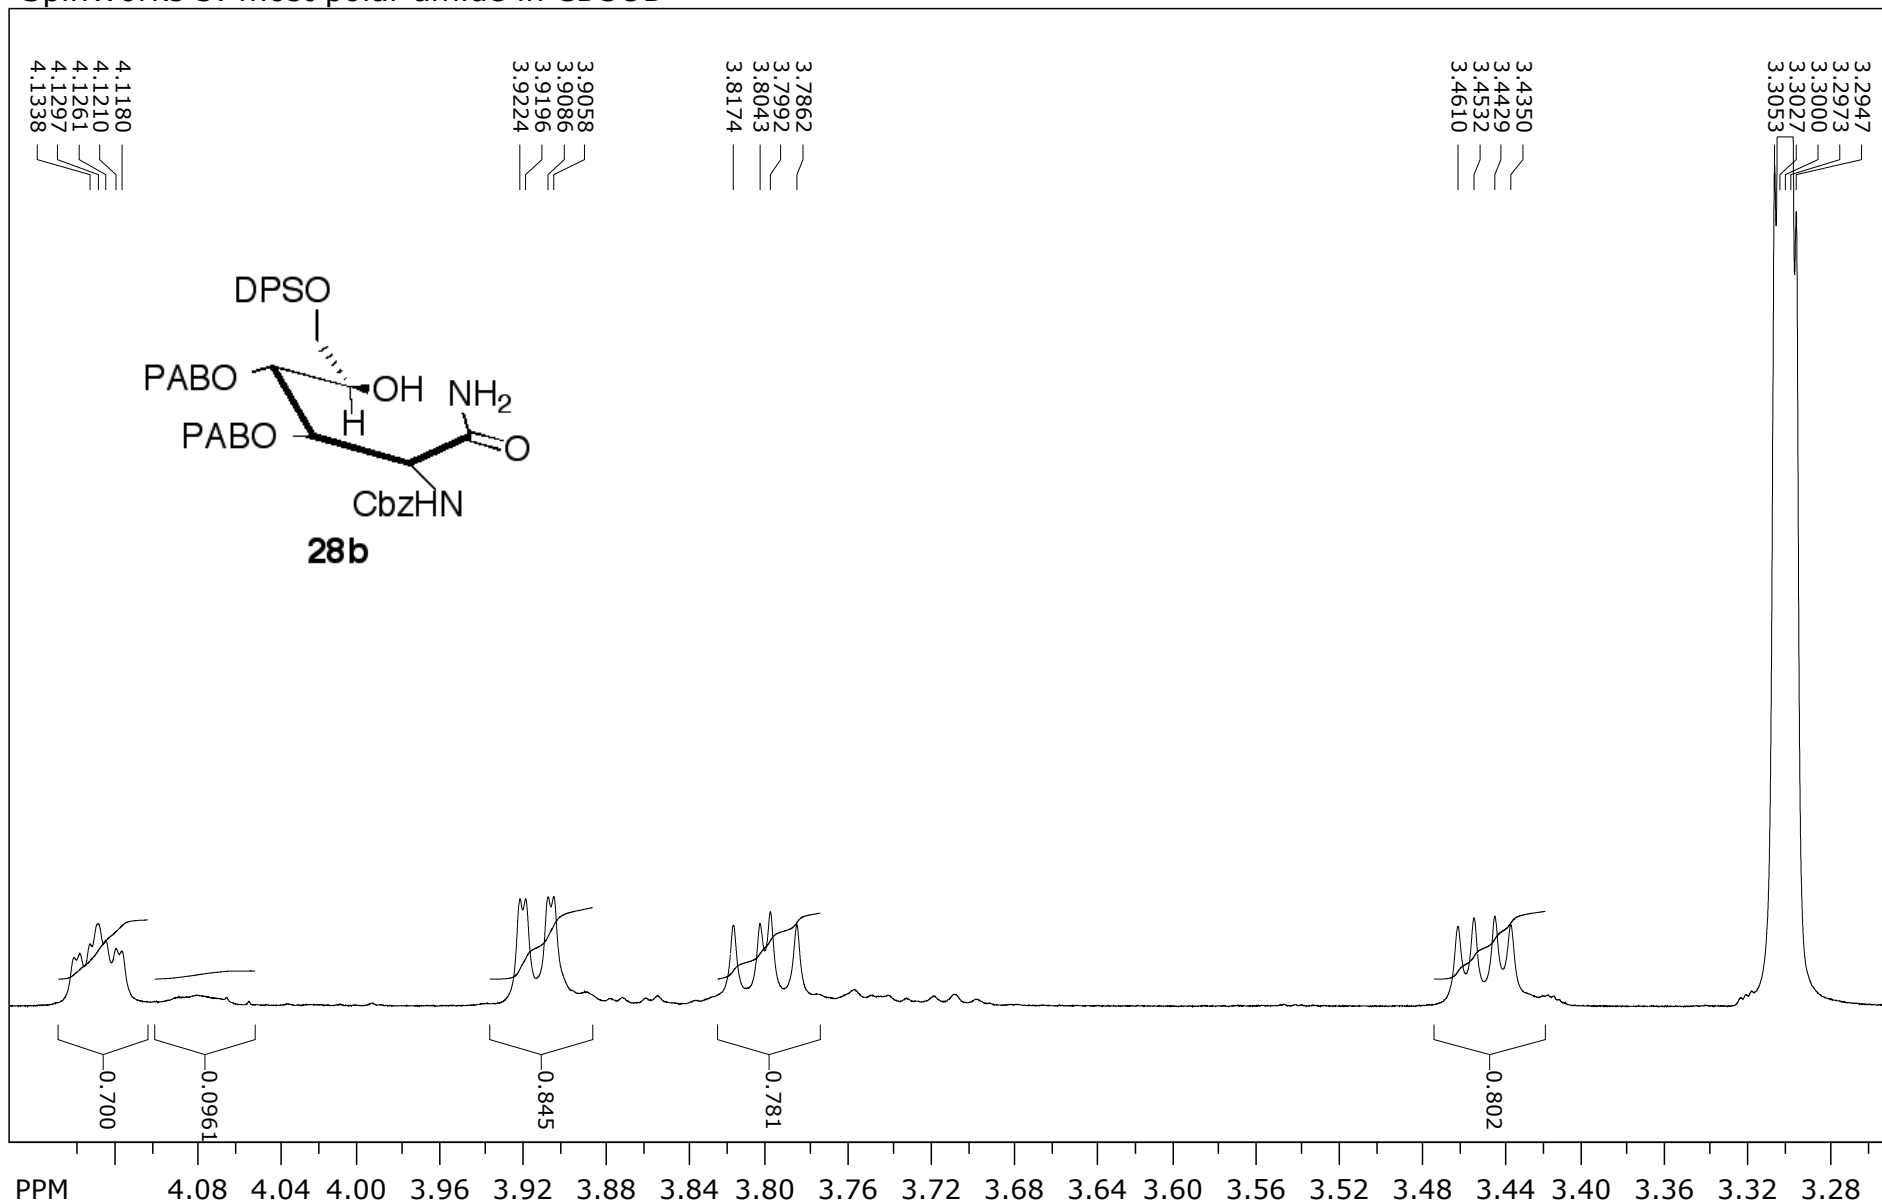

file: ...\\NMR Data\\mostPolAmide\_CD3OD\\1\\fid expt: <zgpr>  
transmitter freq.: 600.553538 MHz  
time domain size: 65536 points  
width: 8417.51 Hz = 14.0162 ppm = 0.128441 Hz/pt  
number of scans: 32

freq. of 0 ppm: 600.550023 MHz  
processed size: 262144 complex points  
LB: 0.000 GF: 0.0000  
Hz/cm: 22.236 ppm/cm: 0.03703



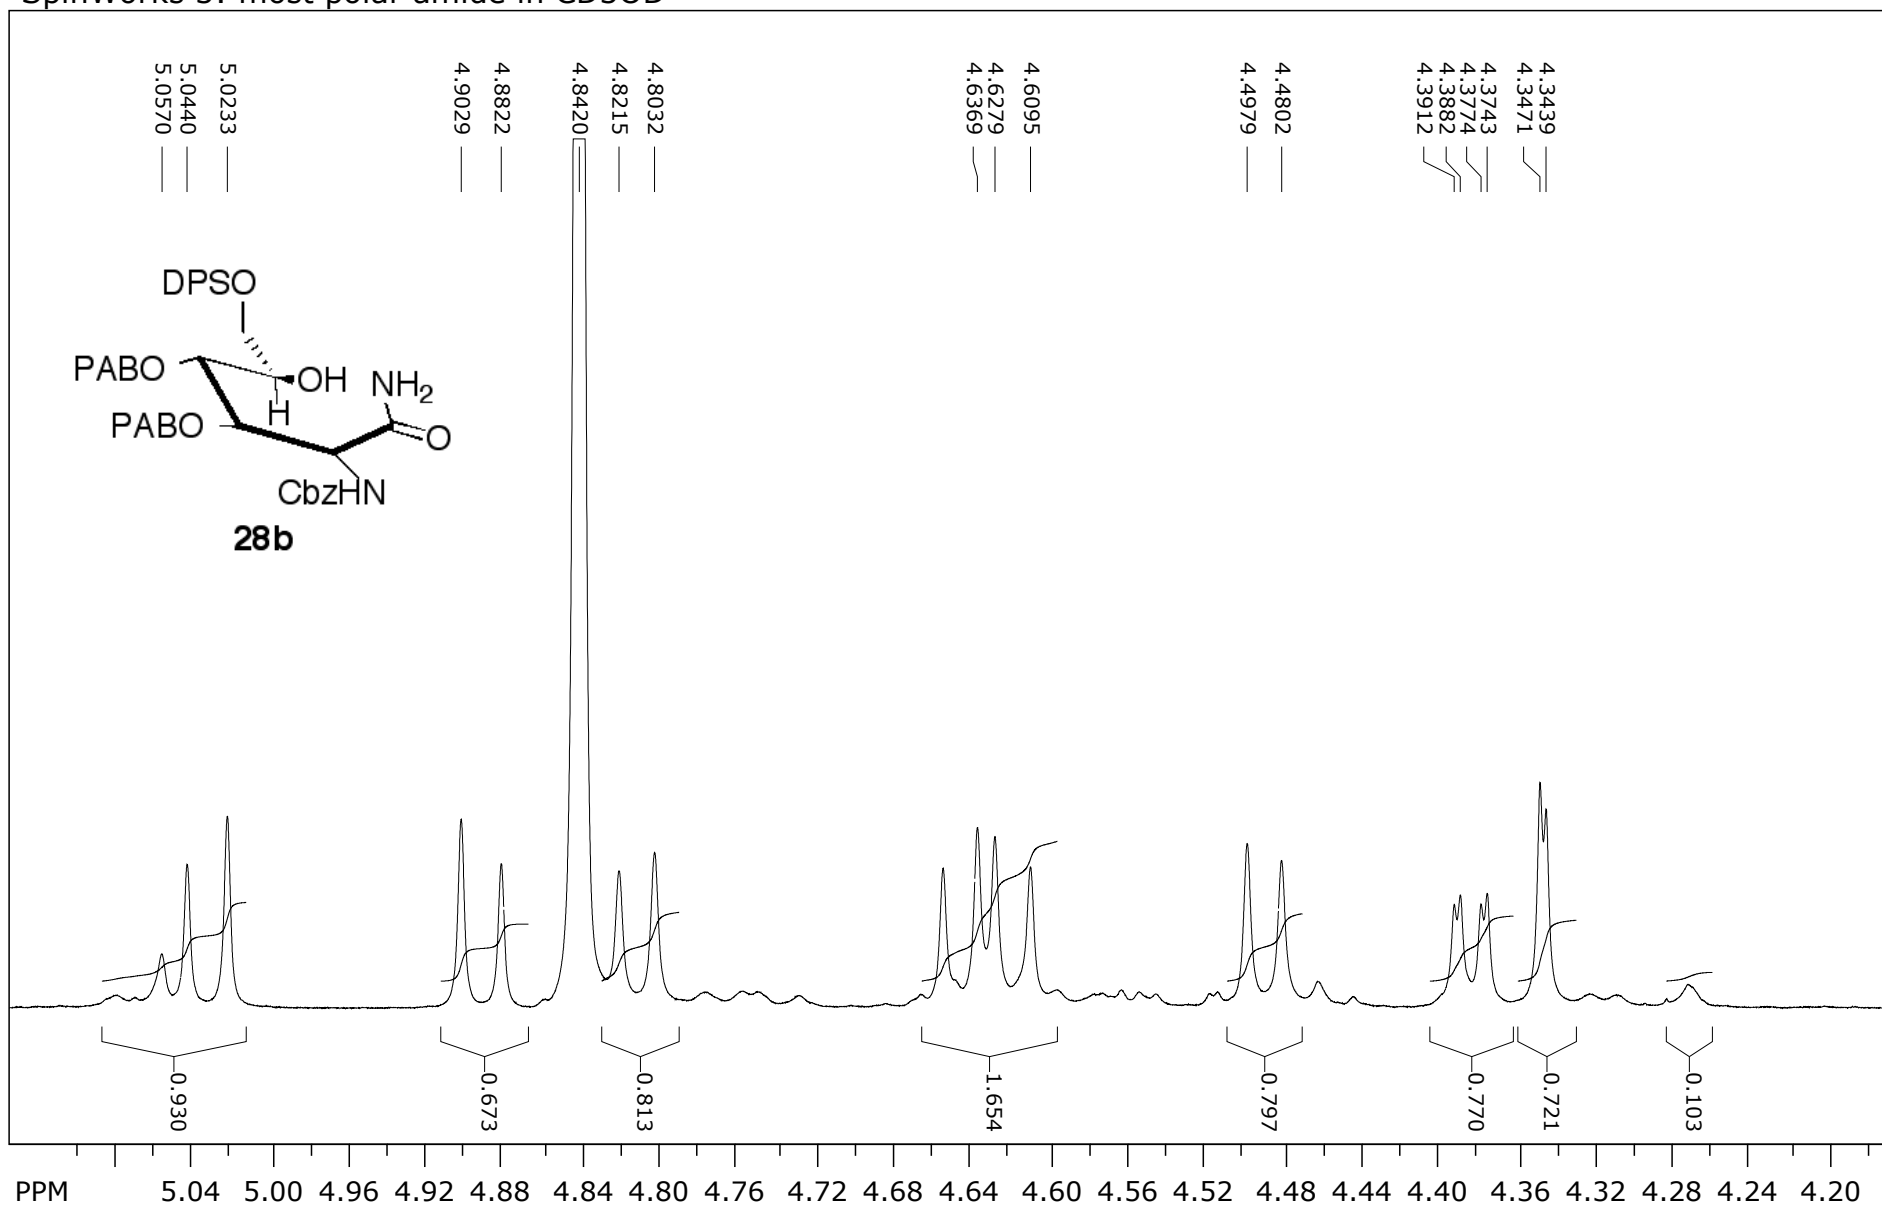

file: ...\\NMR Data\\mostPolAmide\_CD3OD\\1\\fid expt: <zgpr>  
transmitter freq.: 600.553538 MHz  
time domain size: 65536 points  
width: 8417.51 Hz = 14.0162 ppm = 0.128441 Hz/pt  
number of scans: 32

freq. of 0 ppm: 600.550023 MHz  
processed size: 262144 complex points  
LB: 0.000 GF: 0.0000  
Hz/cm: 23.291 ppm/cm: 0.03878

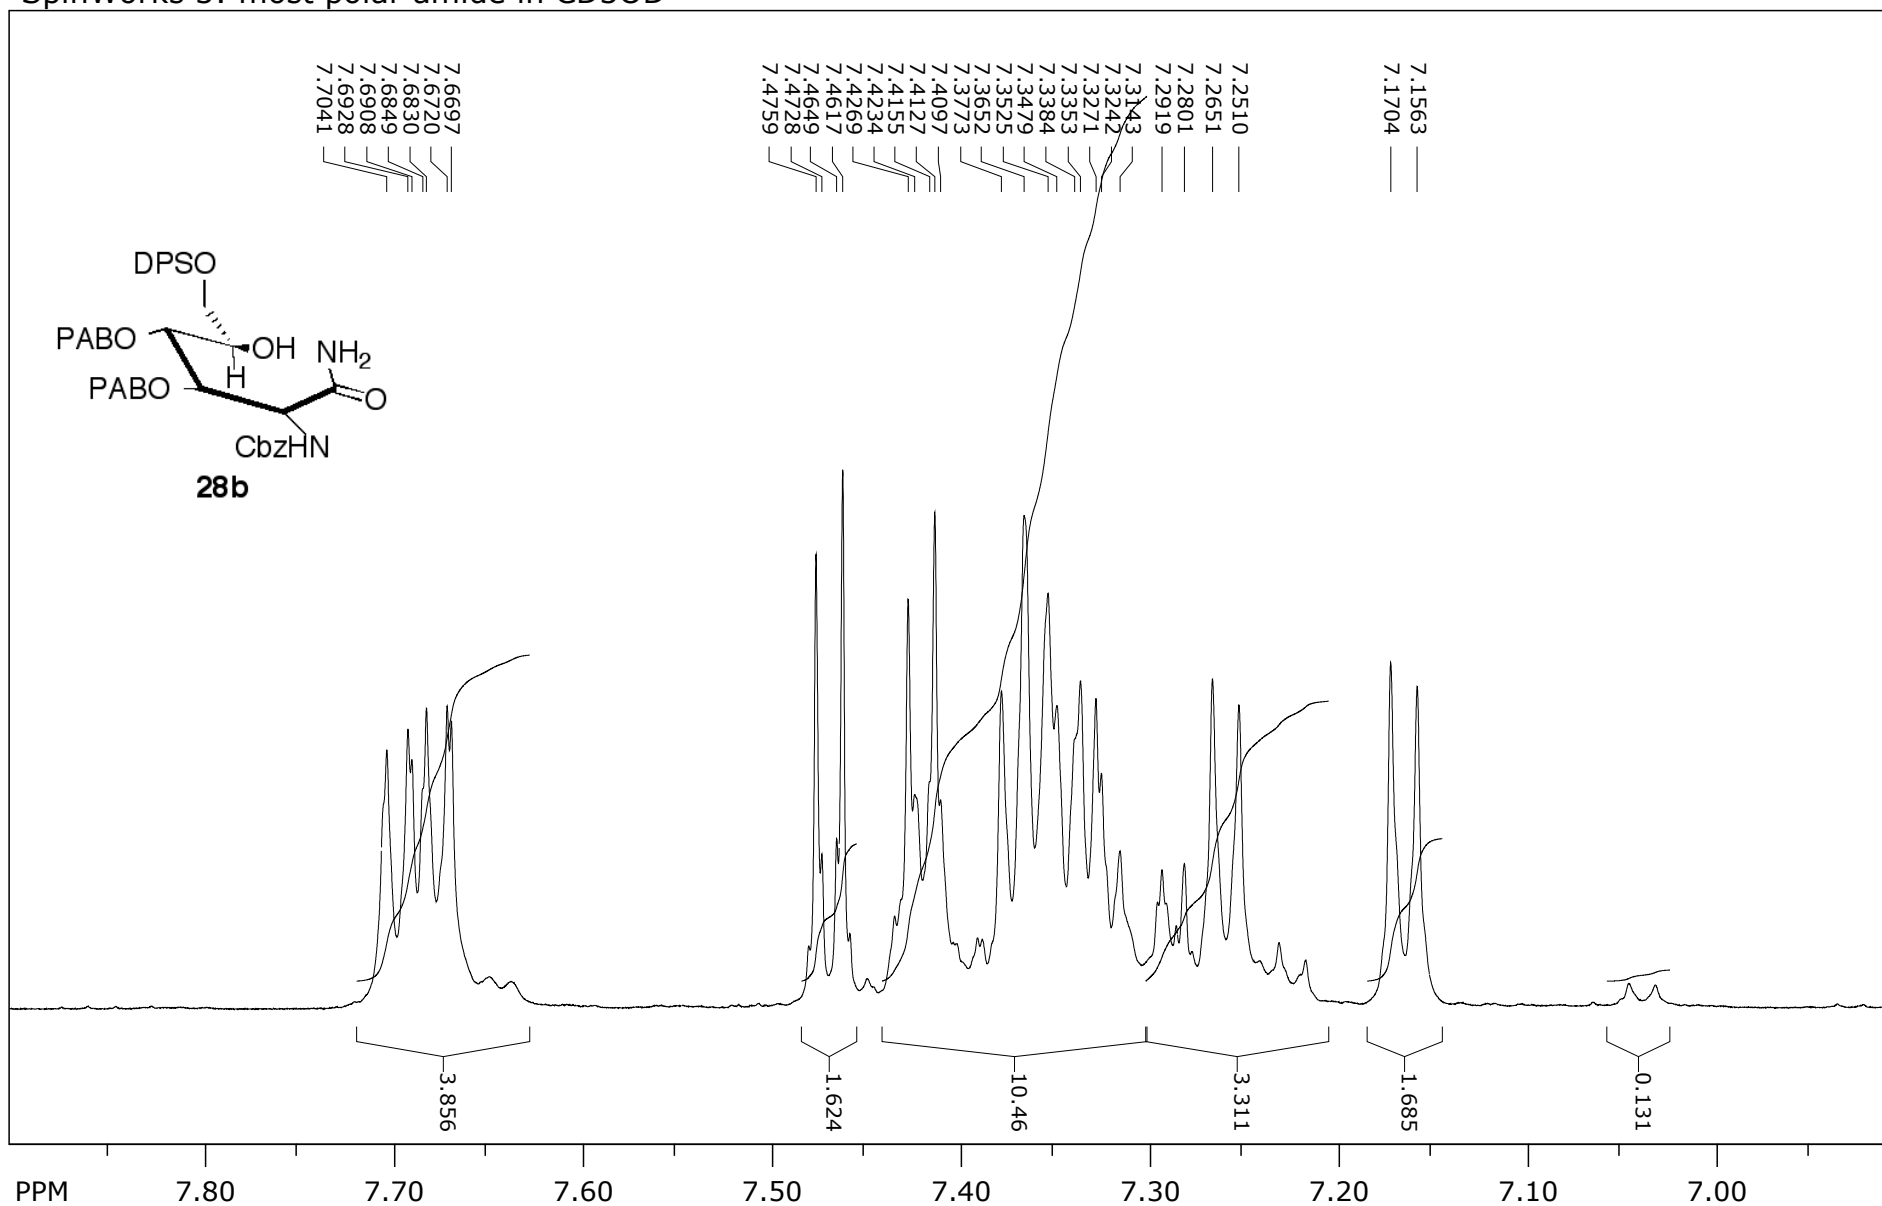

file: ...\\NMR Data\\mostPolAmide\_CD3OD\\1\\fid expt: <zgpr>  
 transmitter freq.: 600.553538 MHz  
 time domain size: 65536 points  
 width: 8417.51 Hz = 14.0162 ppm = 0.128441 Hz/pt  
 number of scans: 32

freq. of 0 ppm: 600.550023 MHz  
 processed size: 262144 complex points  
 LB: 0.000 GF: 0.0000  
 Hz/cm: 24.037 ppm/cm: 0.04002

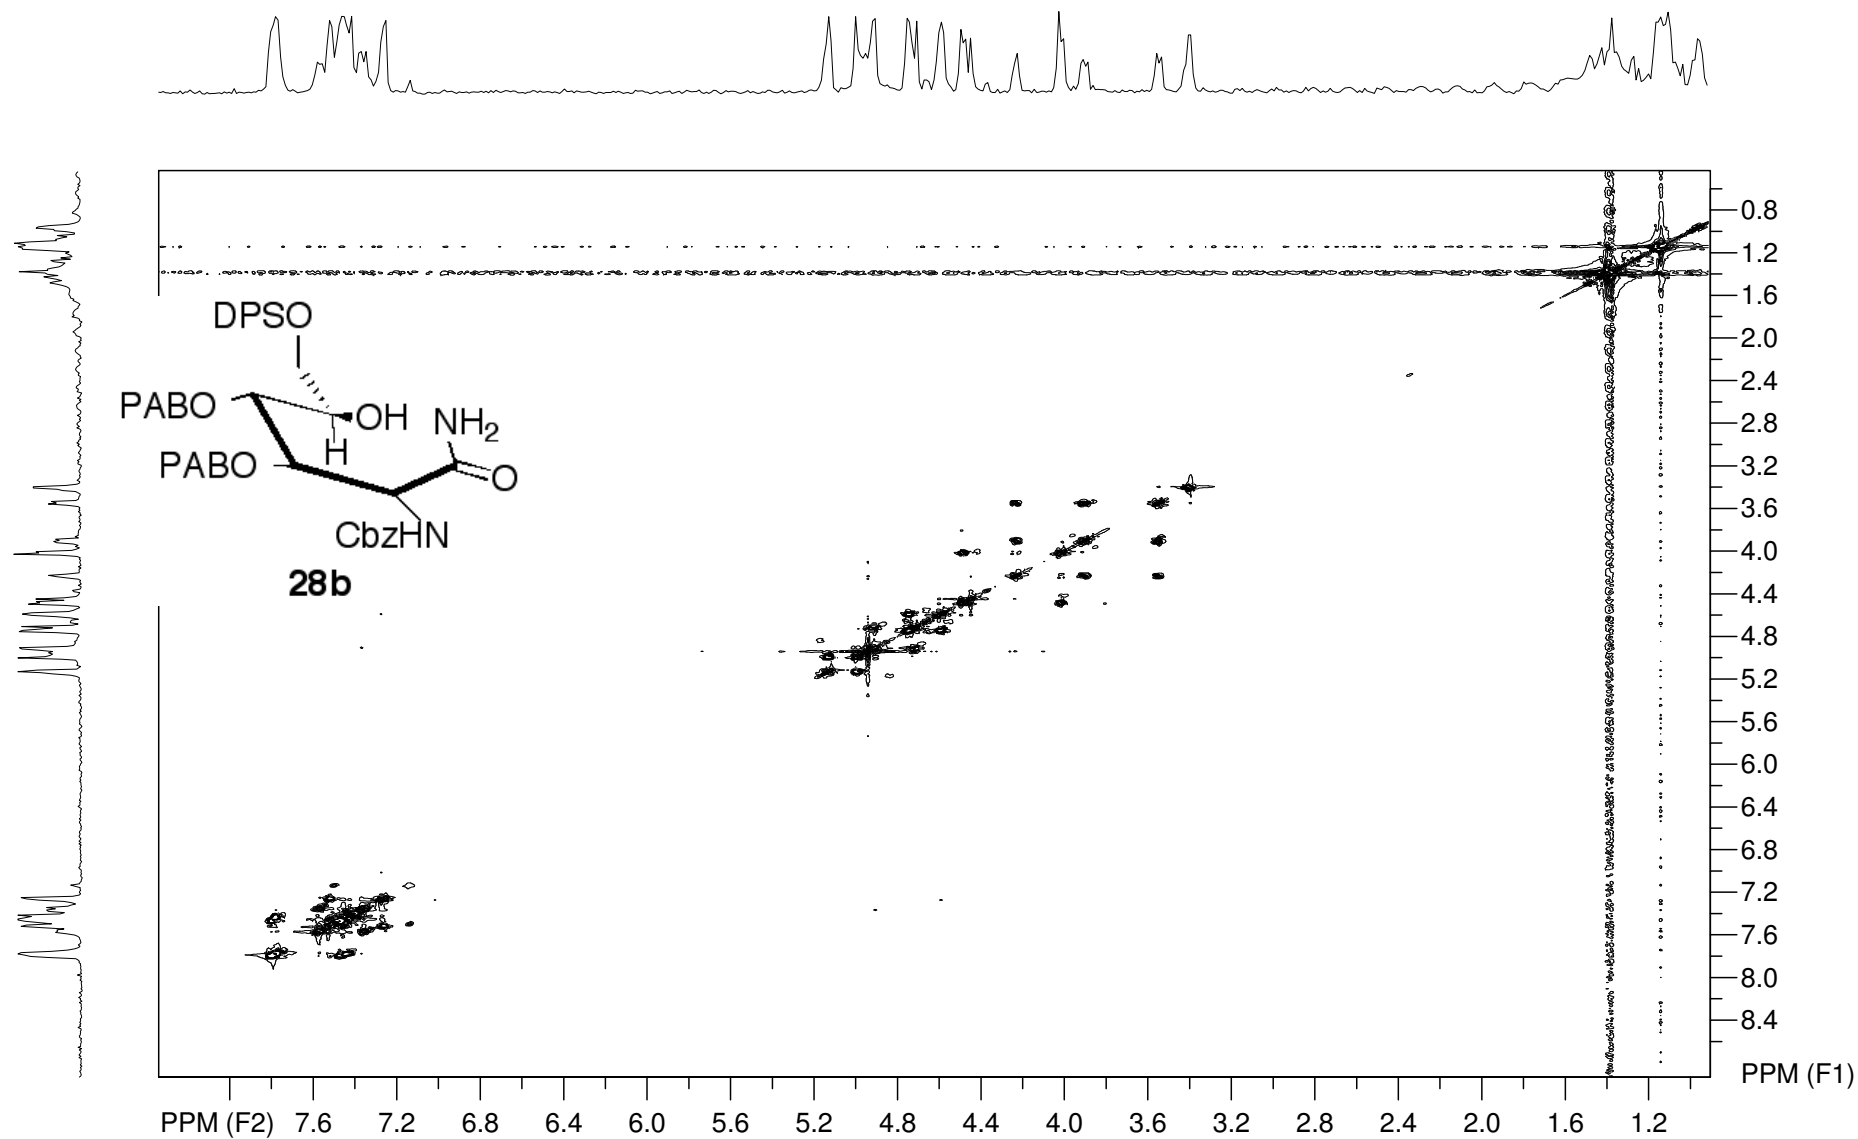

file: C:\Users\Jeff\Documents\NMR Folder\NMR Data\remaining to process\mostPolAmide\_COSY\1\sF2: freq. of 0 ppm: 600.549962 MHz  
transmitter freq.: 600.552832 MHz  
time domain size: 2048 by 2048 points  
width (F2): 7211.50 Hz = 12.008167 ppm = 3.521242 Hz/pt  
number of scans: 2

processed size: 1024 complex points  
window function: Sine  
shift: 0.0 degrees  
Hz/cm: 217.844 ppm/cm: 0.36274

F1: freq. of 0 ppm: 600.549962 MHz  
processed size: 1024 complex points  
window function: Sine  
shift: 0.0 degrees  
Hz/cm: 425.708 ppm/cm: 0.70886

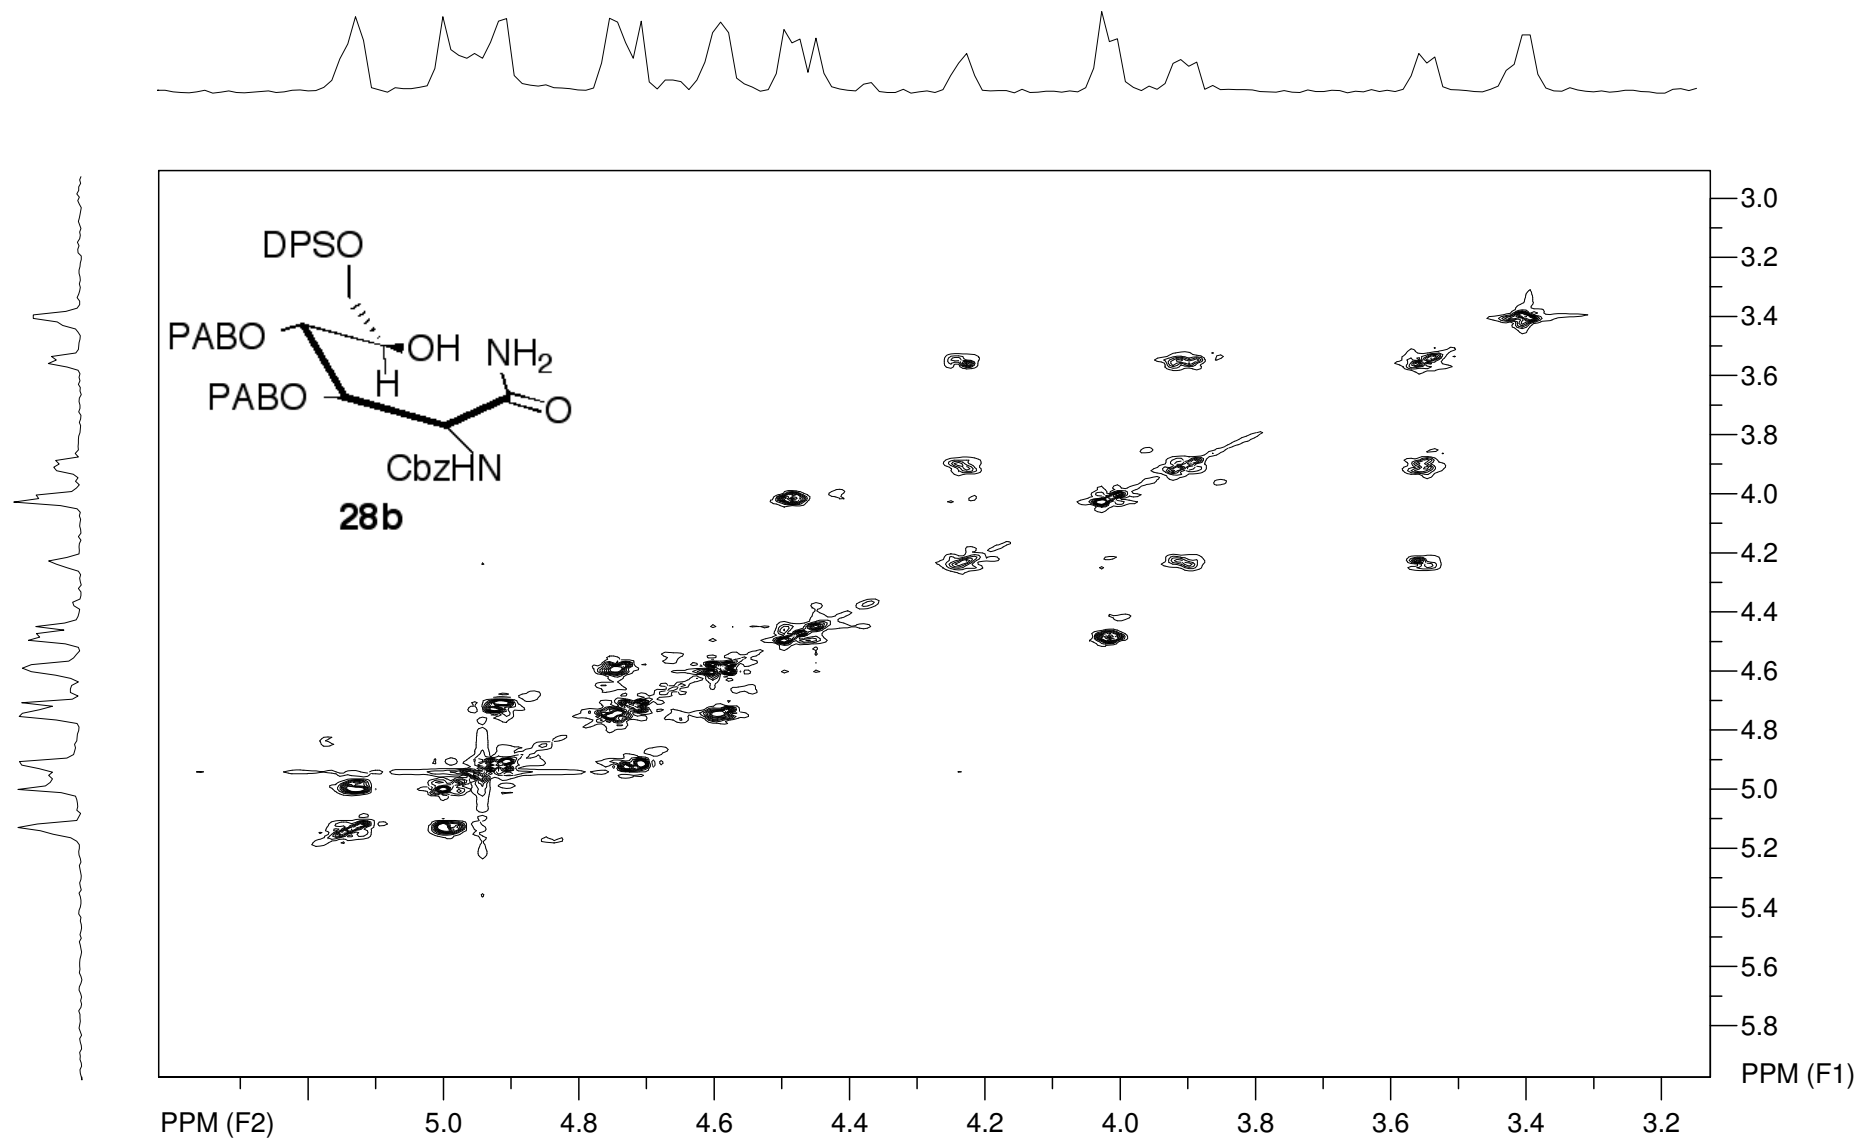

file: C:\Users\Jeff\Documents\NMR Folder\NMR Data\remaining to process\mostPolAmide\_COSY\1\F2: freq. of 0 ppm: 600.549962 MHz  
transmitter freq.: 600.552832 MHz  
time domain size: 2048 by 2048 points  
width (F2): 7211.50 Hz = 12.008167 ppm = 3.521242 Hz/pt  
number of scans: 2

processed size: 1024 complex points  
window function: Sine  
shift: 0.0 degrees  
Hz/cm: 67.177 ppm/cm: 0.11186

F1: freq. of 0 ppm: 600.549962 MHz  
processed size: 1024 complex points  
window function: Sine  
shift: 0.0 degrees  
Hz/cm: 153.578 ppm/cm: 0.25573

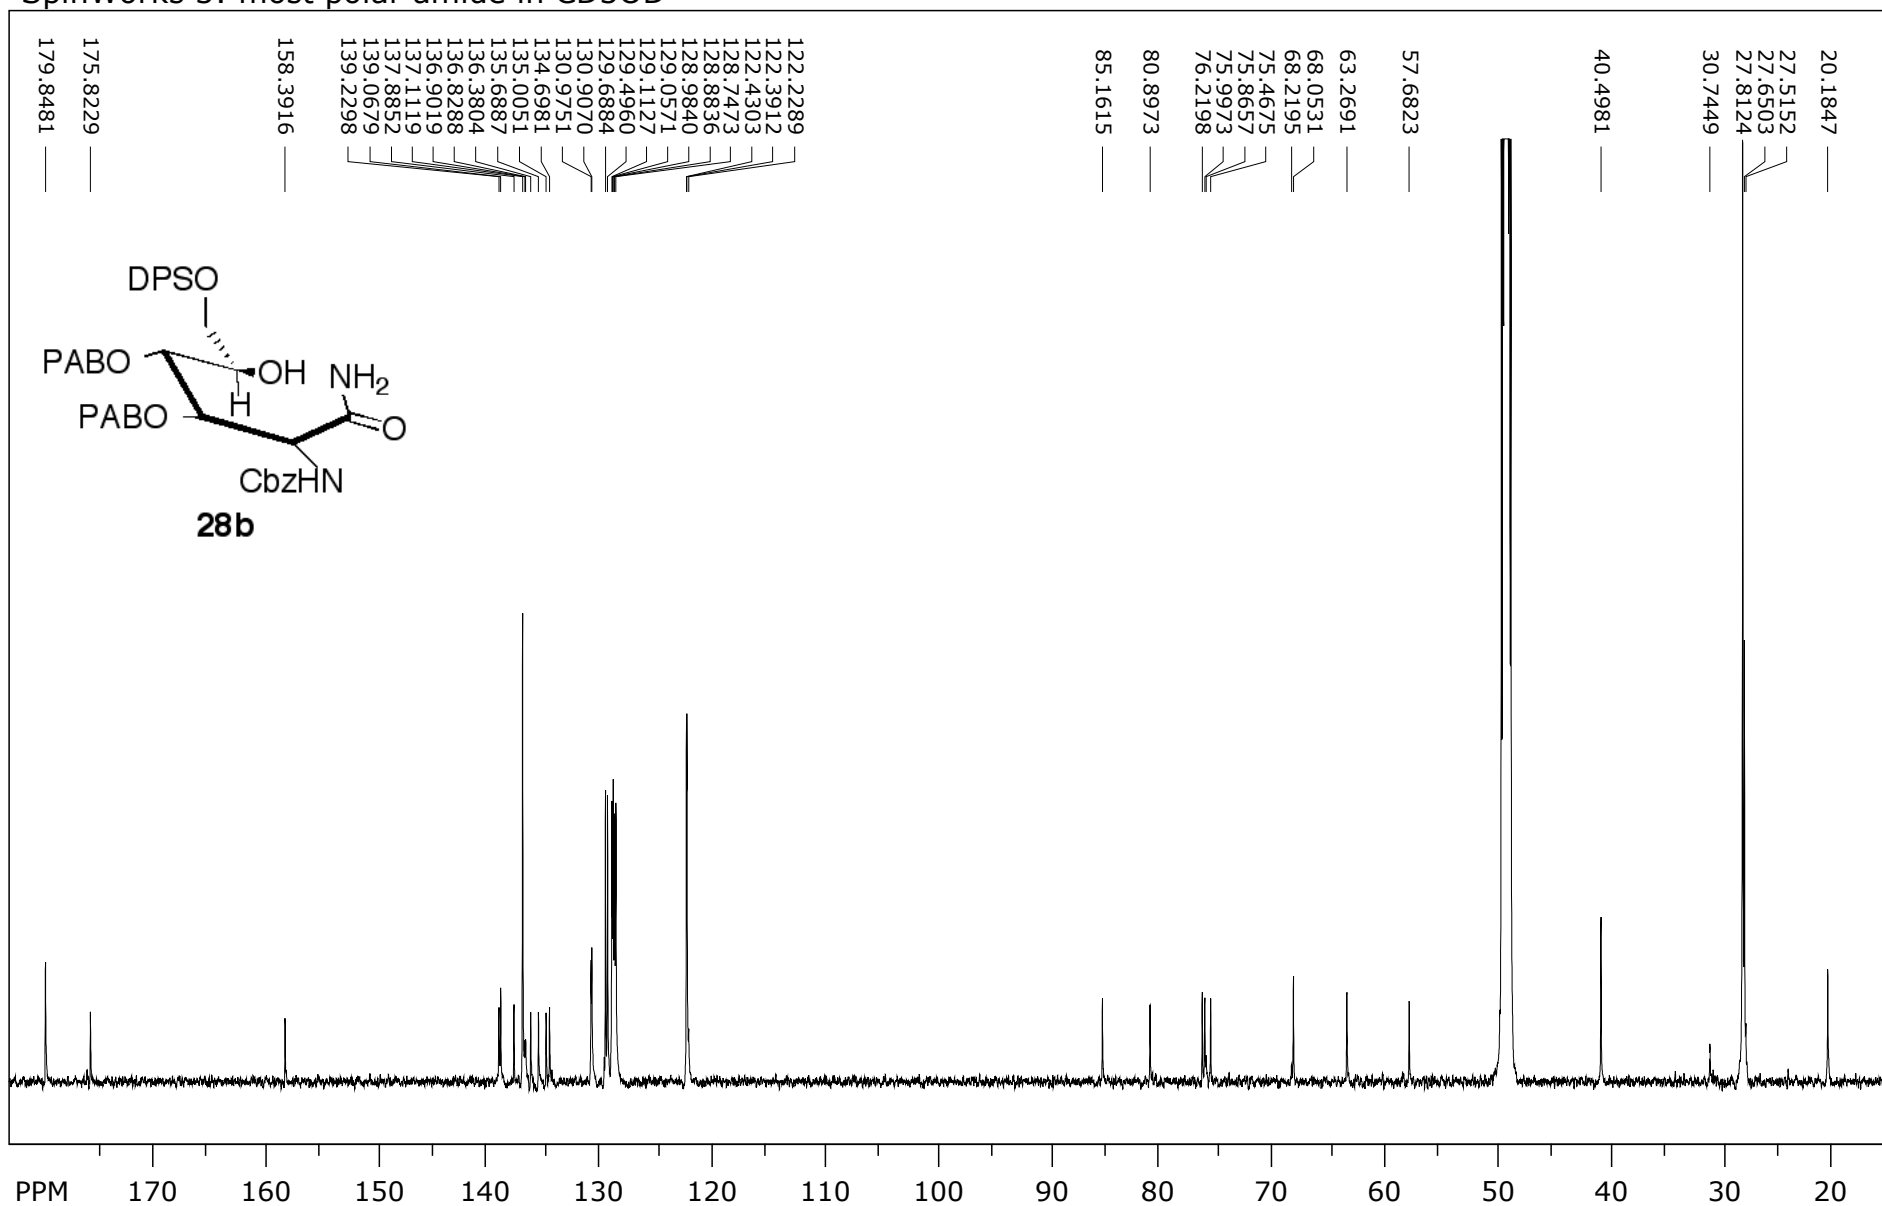

file: ...R Data\mostPolAmide\_13CCD3OD\1\fid expt: <zpgg30>  
 transmitter freq.: 151.023519 MHz  
 time domain size: 65536 points  
 width: 36057.69 Hz = 238.7555 ppm = 0.550197 Hz/pt  
 number of scans: 22528

freq. of 0 ppm: 151.008207 MHz  
 processed size: 32768 complex points  
 LB: 5.000 GF: 0.0000  
 Hz/cm: 1018.475 ppm/cm: 6.74382

|               |                      |             |                      |                 |              |                        |                      |
|---------------|----------------------|-------------|----------------------|-----------------|--------------|------------------------|----------------------|
| Sample Name   | Jeff-36              | Position    | Vial 22              | Instrument Name | Instrument 1 | User Name              | DYL                  |
| Inj Vol       | 2                    | InjPosition |                      | SampleType      | Unknown      | IRM Calibration Status | Some Ions Missed     |
| Data Filename | C18_Elution2_S36_Jef | ACQ Method  | C18 waters symmetry2 | Comment         |              | Acquired Time          | 9/15/2012 9:39:15 AM |

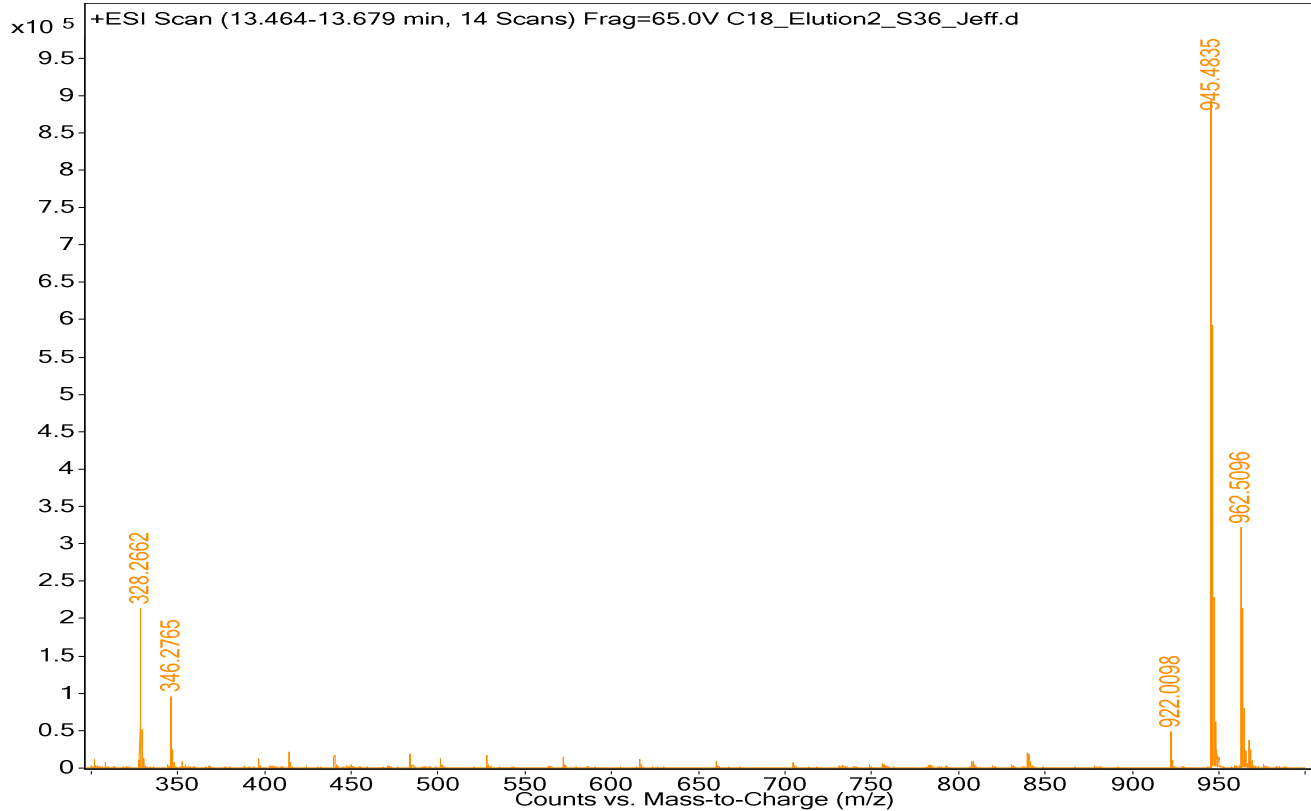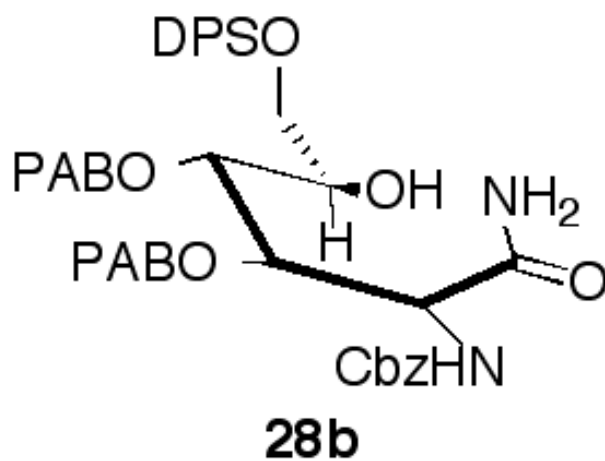

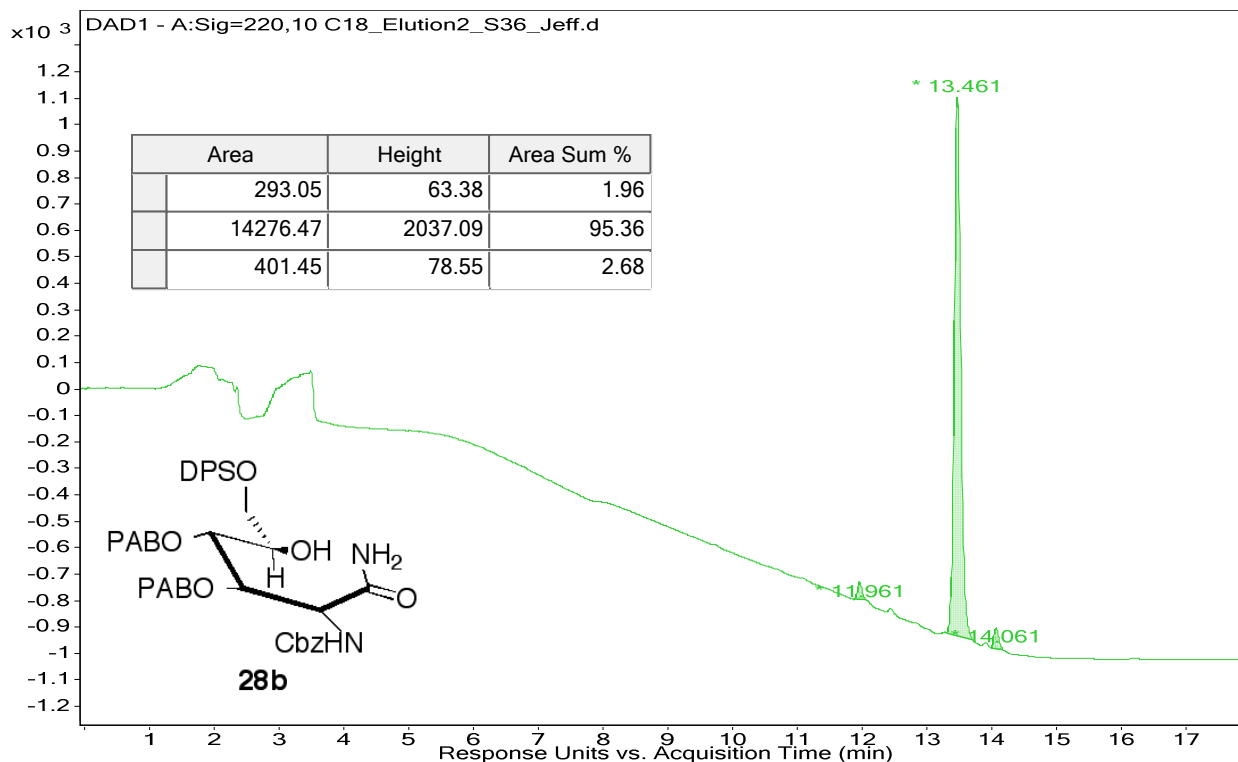

|               |                      |             |                      |                 |              |                        |                      |
|---------------|----------------------|-------------|----------------------|-----------------|--------------|------------------------|----------------------|
| Sample Name   | Jeff-36              | Position    | Vial 22              | Instrument Name | Instrument 1 | User Name              | DYL                  |
| Inj Vol       | 2                    | InjPosition |                      | SampleType      | Unknown      | IRM Calibration Status | Some Ions Missed     |
| Data Filename | C18_Elution2_S36_Jef | ACQ Method  | C18 waters symmetry2 | Comment         |              | Acquired Time          | 9/15/2012 9:39:15 AM |

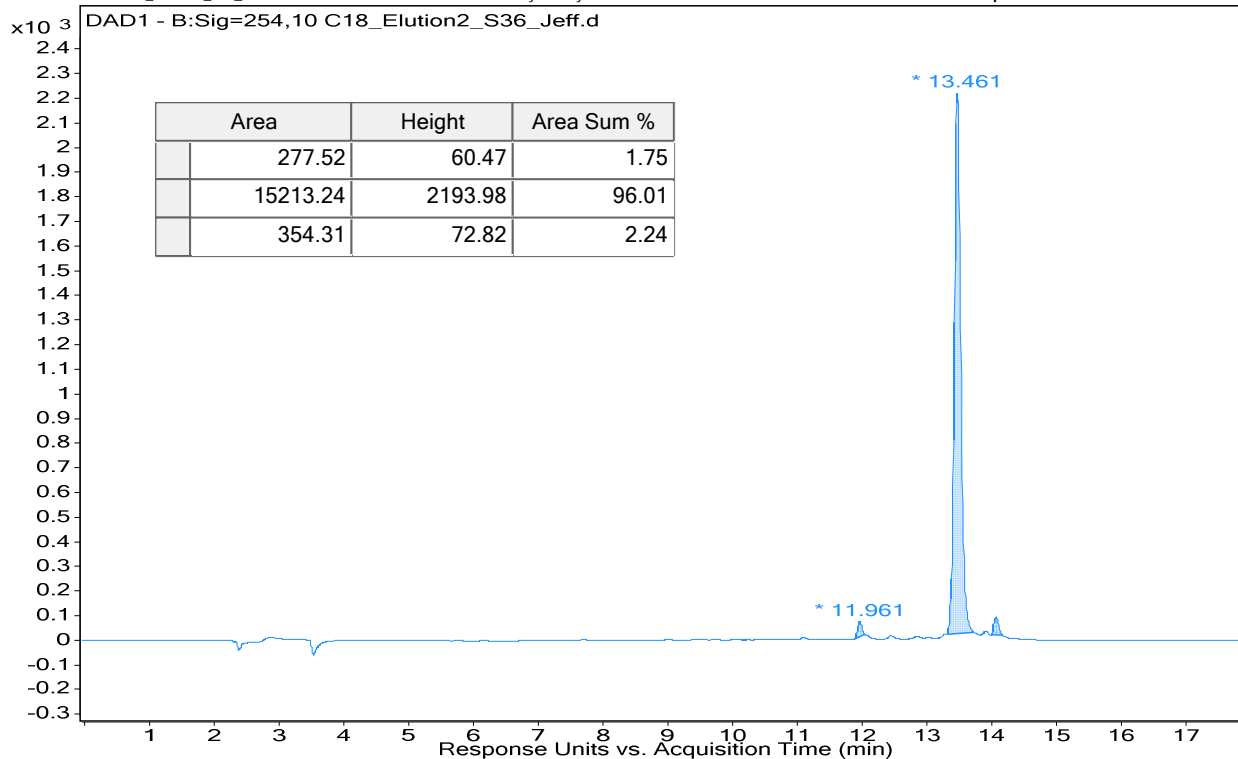

Analysis on a Waters SymmetryShield™ C18 (4.6 mm X 15 cm (i.d. x l.), 3.5 μm) at 0.5 mL/min. Solvent A: 50 mM NH<sub>4</sub>OAc (aq); B: CH<sub>3</sub>CN

| Time (min) | % B |
|------------|-----|
| 0          | 20  |
| 1          | 20  |
| 10         | 100 |
| 20         | 100 |

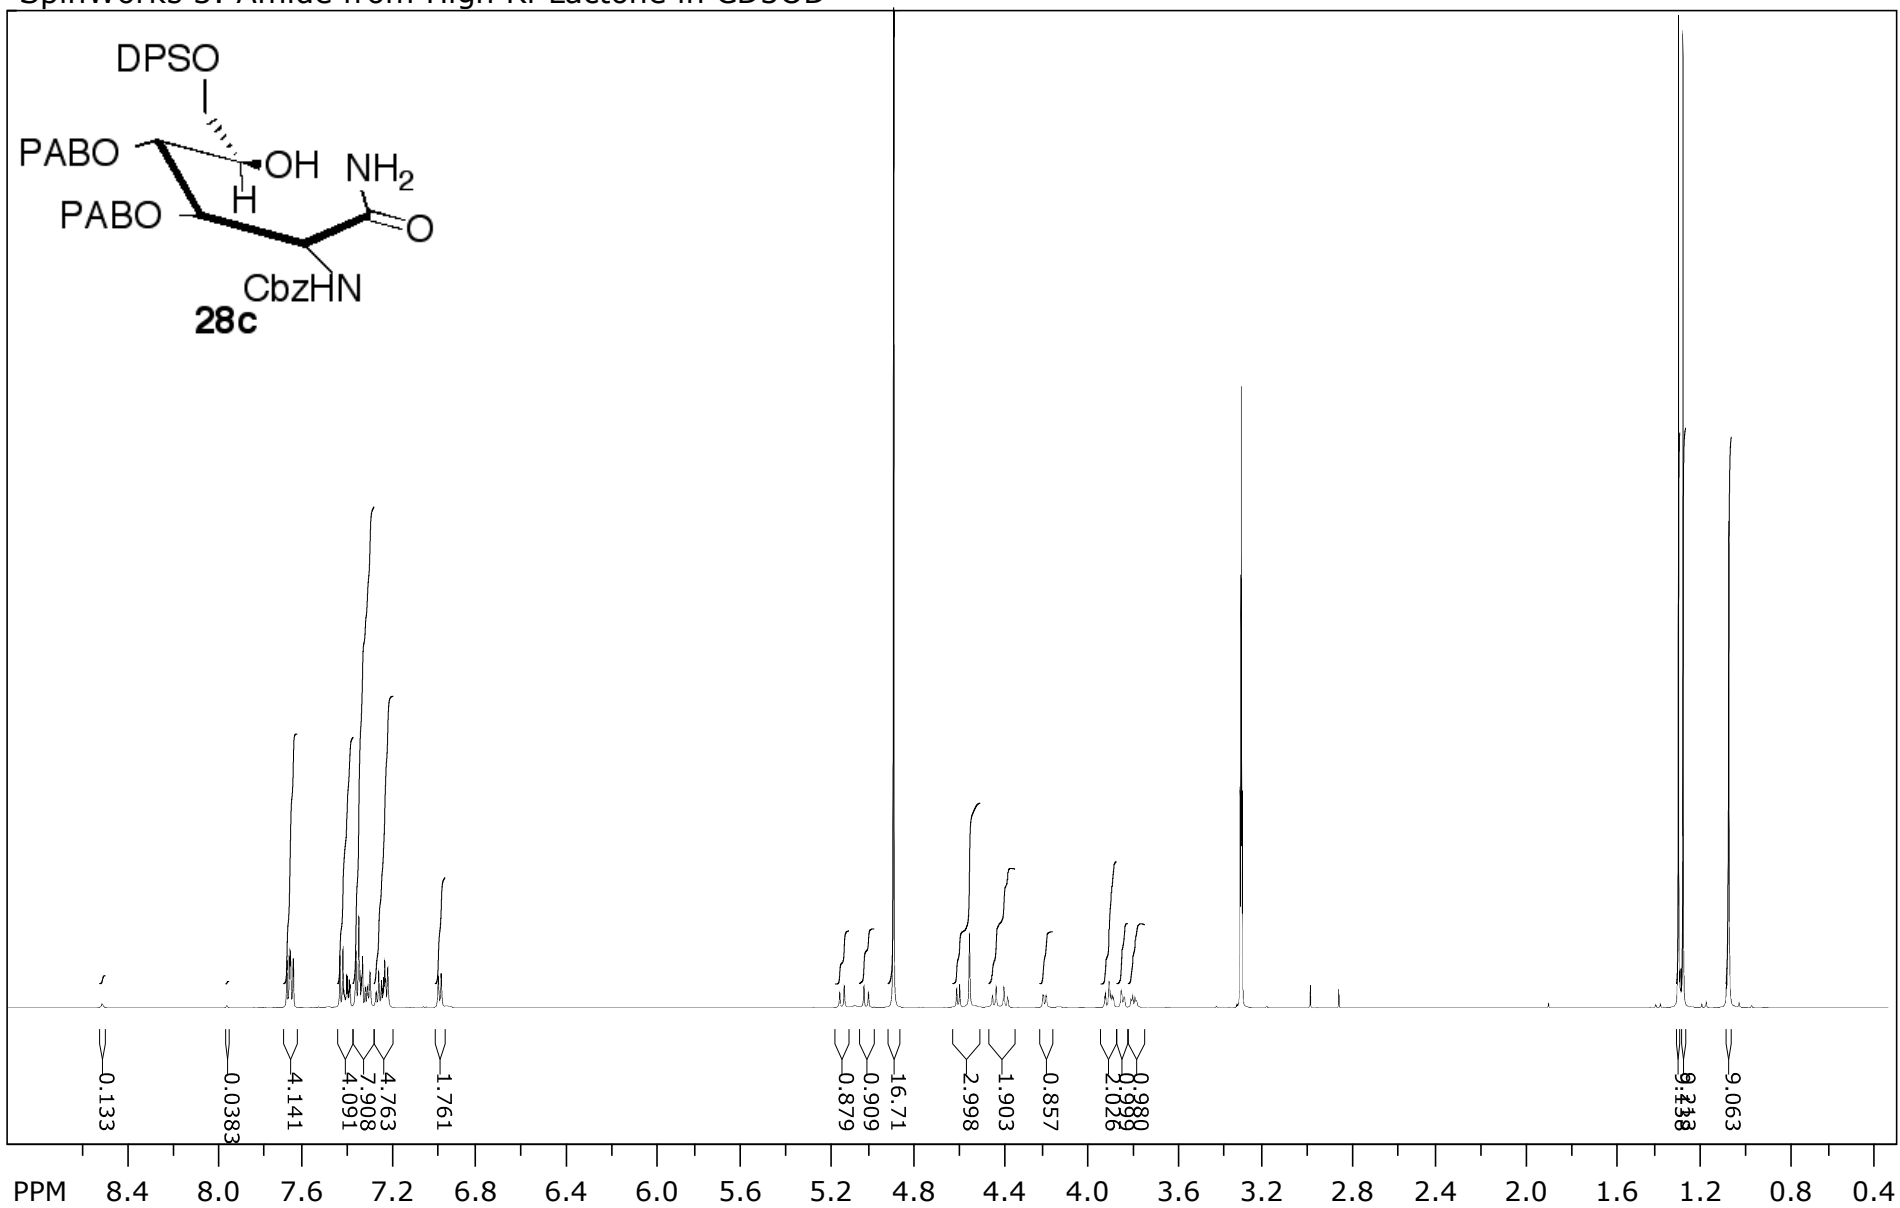

file: ...er\NMR Data\AmFrHi\_pk1\_CD3OD\1\fid expt: <zgpr>  
transmitter freq.: 600.553538 MHz  
time domain size: 65536 points  
width: 8417.51 Hz = 14.0162 ppm = 0.128441 Hz/pt  
number of scans: 32

freq. of 0 ppm: 600.550023 MHz  
processed size: 262144 complex points  
LB: 0.000 GF: 0.0000  
Hz/cm: 208.098 ppm/cm: 0.34651



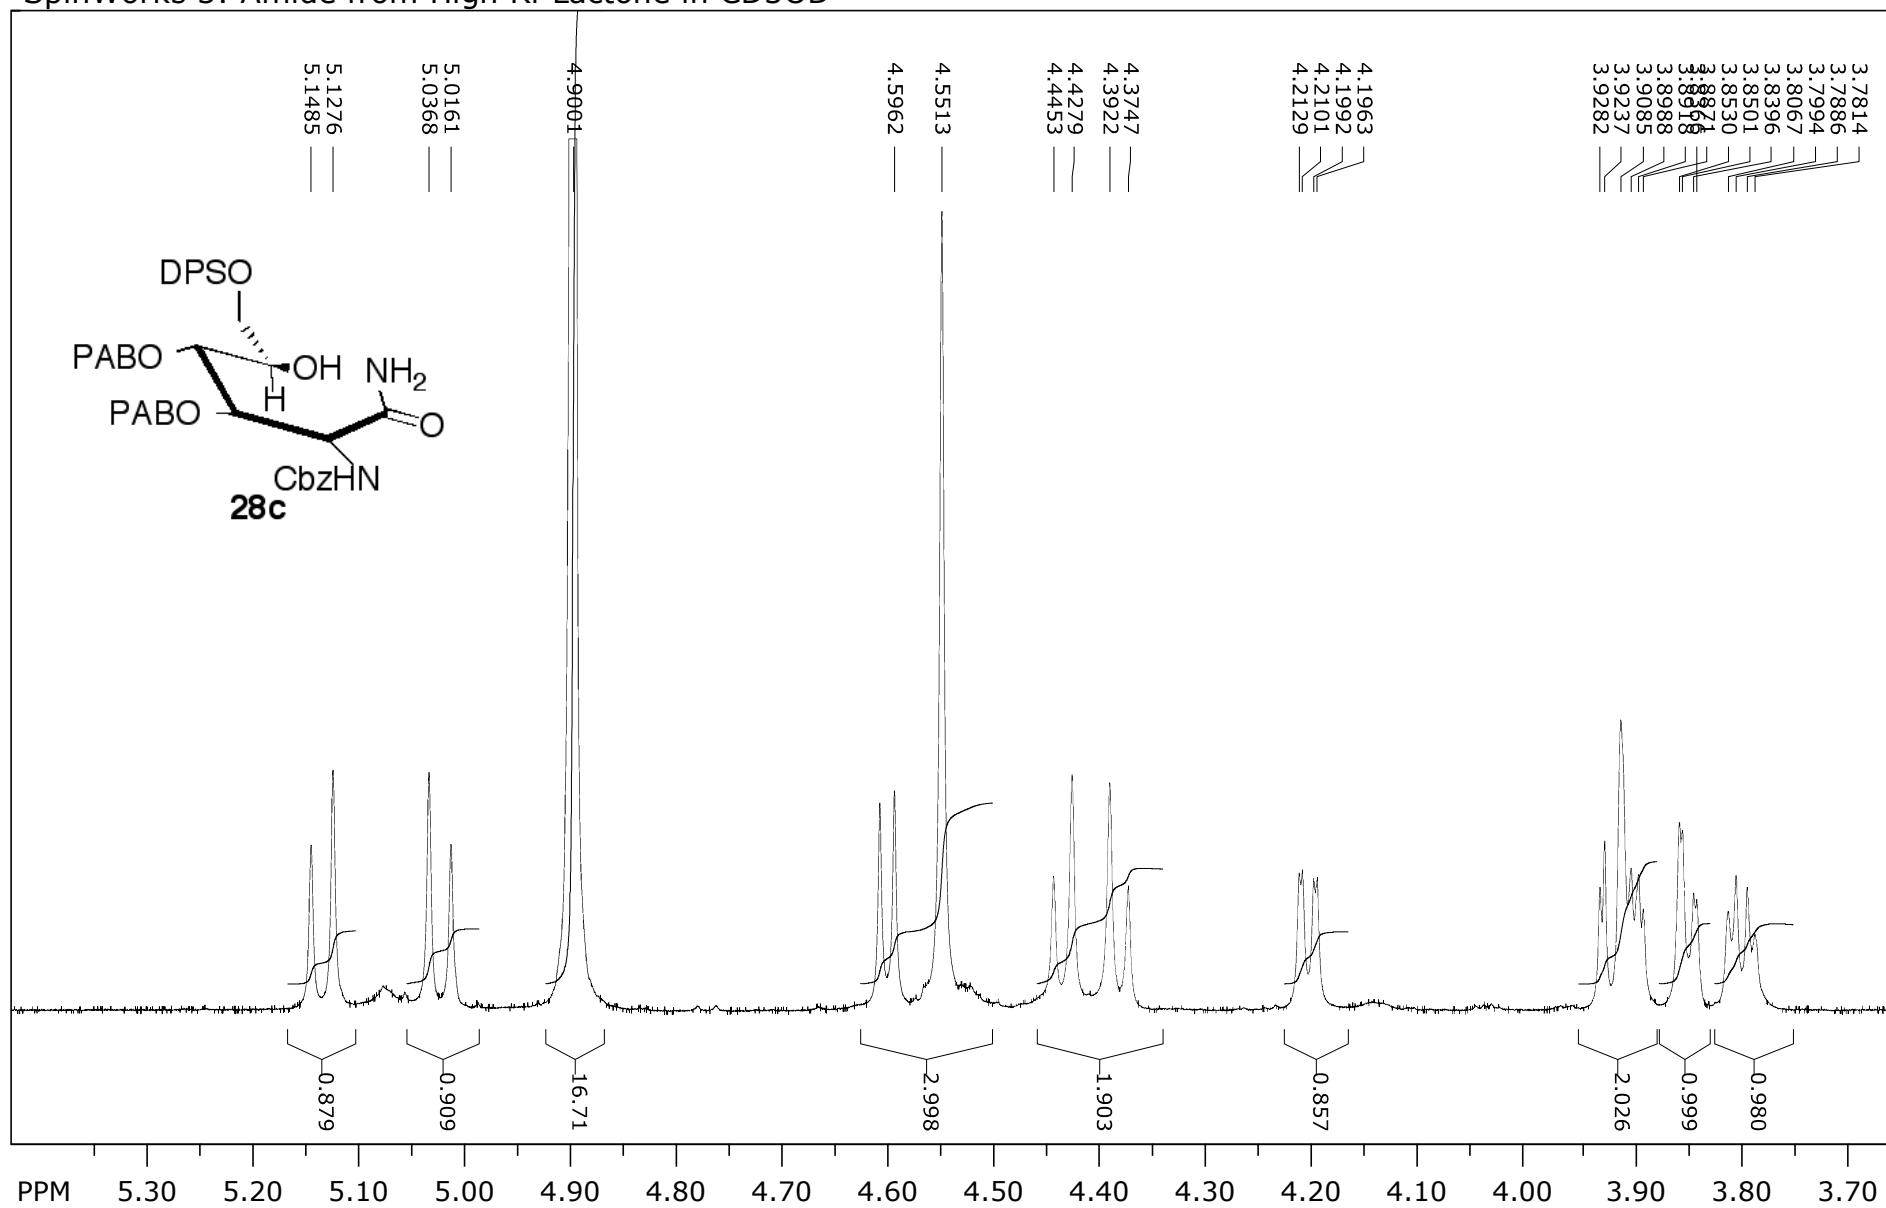

file: ...er\NMR Data\AmFrHi\_pk1\_CD3OD\1\fid expt: <zgpr>  
 transmitter freq.: 600.553538 MHz  
 time domain size: 65536 points  
 width: 8417.51 Hz = 14.0162 ppm = 0.128441 Hz/pt  
 number of scans: 32

freq. of 0 ppm: 600.550023 MHz  
 processed size: 262144 complex points  
 LB: 0.000 GF: 0.0000  
 Hz/cm: 42.806 ppm/cm: 0.07128

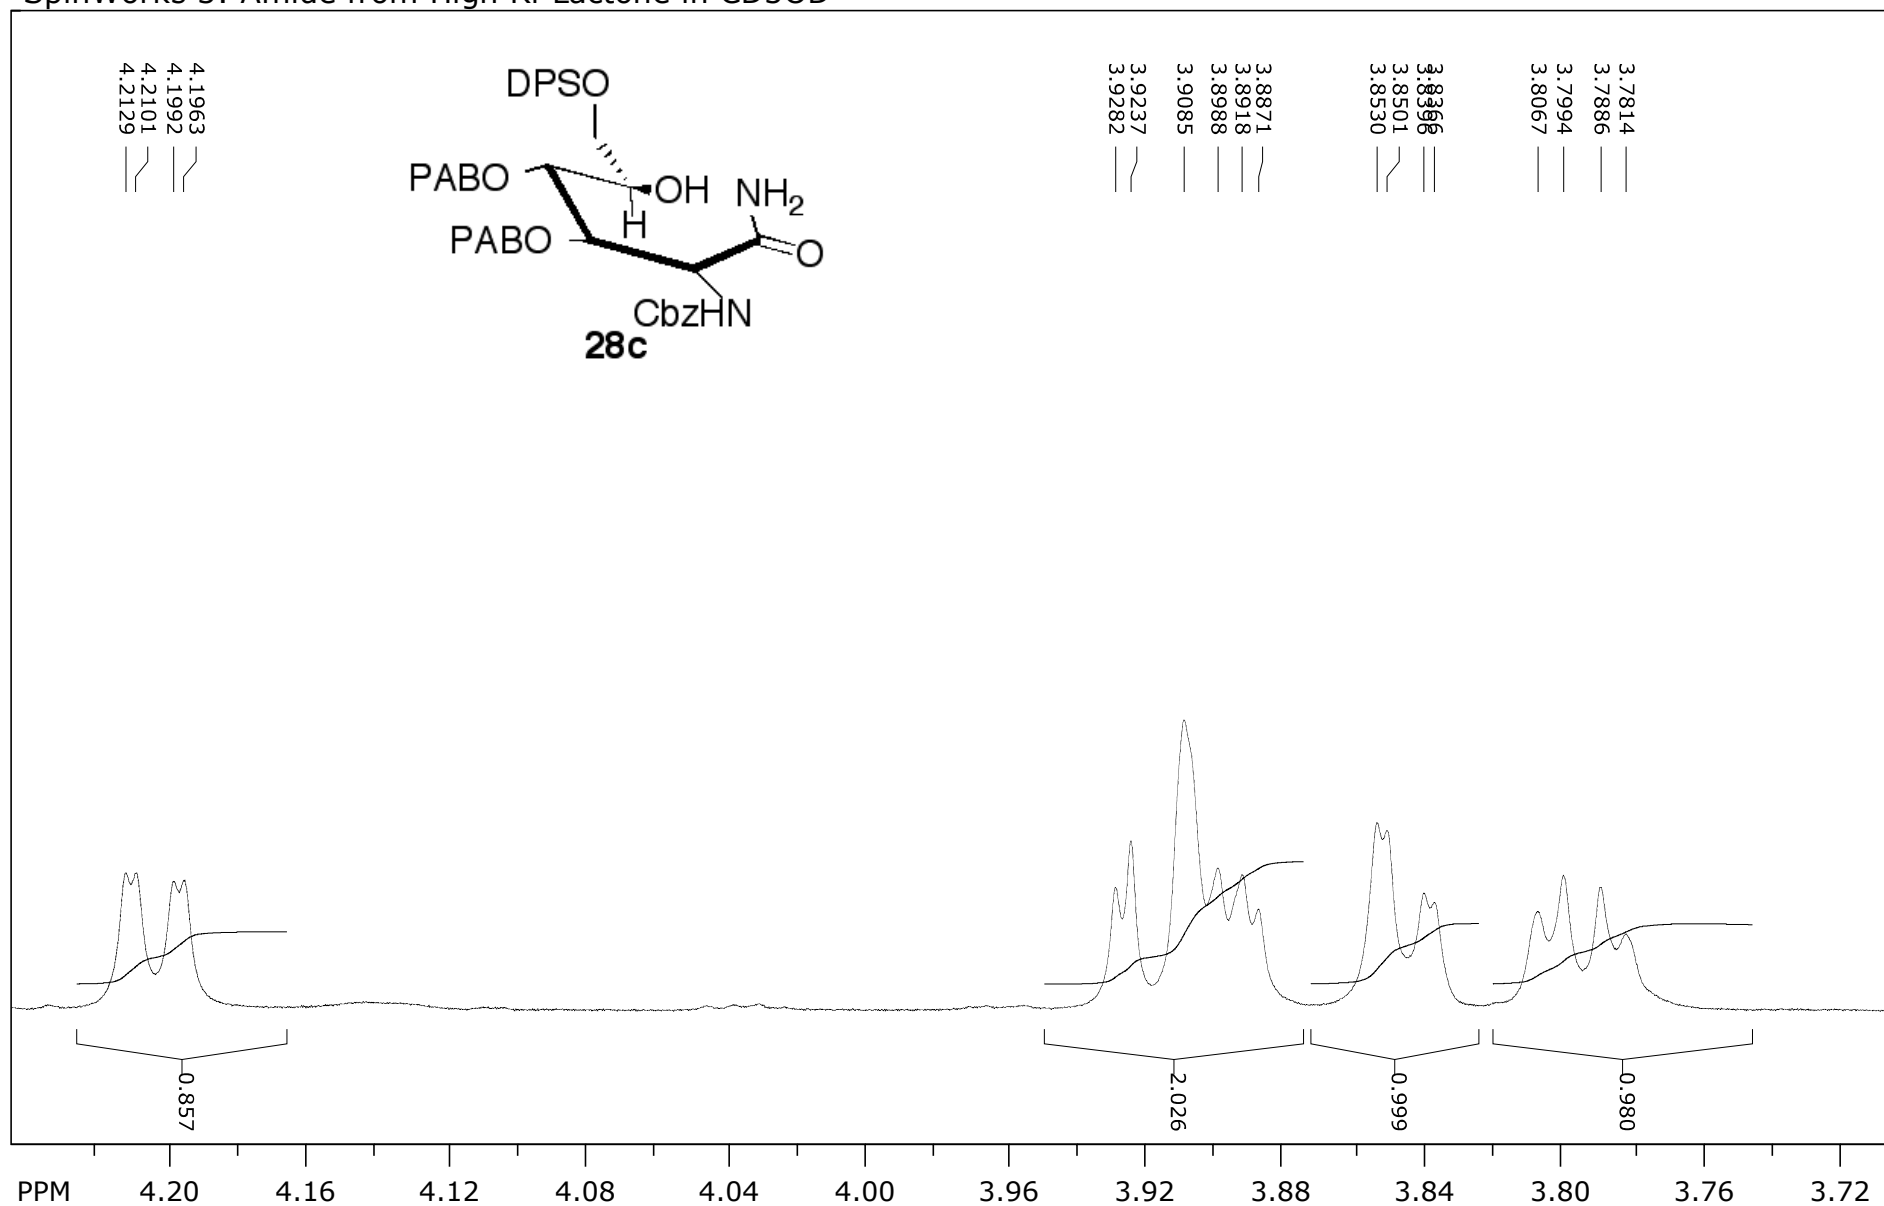

file: ...er\NMR Data\AmFrHi\_pk1\_CD3OD\1\fid expt: <zgpr>  
 transmitter freq.: 600.553538 MHz  
 time domain size: 65536 points  
 width: 8417.51 Hz = 14.0162 ppm = 0.128441 Hz/pt  
 number of scans: 32

freq. of 0 ppm: 600.550023 MHz  
 processed size: 262144 complex points  
 LB: 0.000 GF: 0.0000  
 Hz/cm: 13.004 ppm/cm: 0.02165

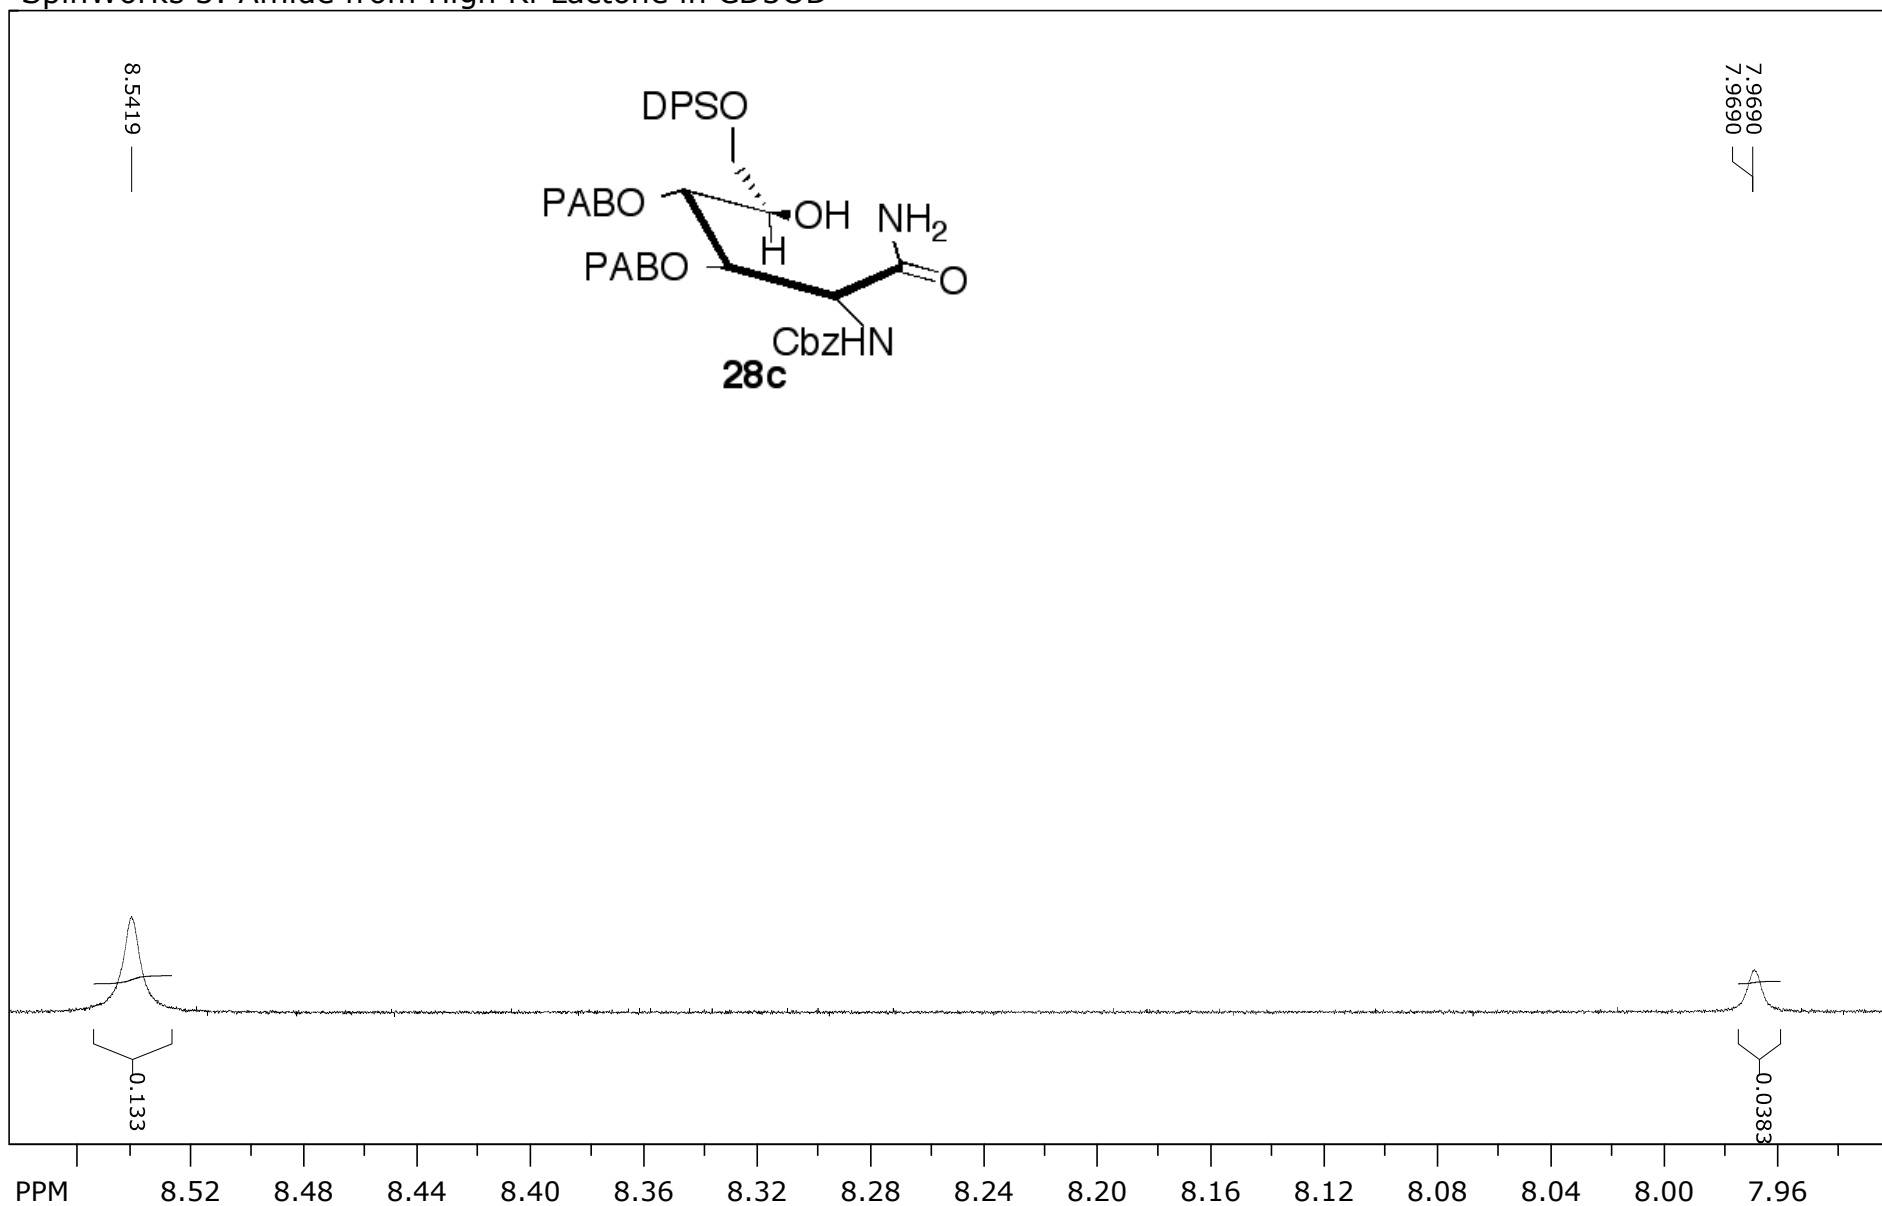

file: ...er\NMR Data\AmFrHi\_pk1\_CD3OD\1\fid expt: <zgpr>  
transmitter freq.: 600.553538 MHz  
time domain size: 65536 points  
width: 8417.51 Hz = 14.0162 ppm = 0.128441 Hz/pt  
number of scans: 32

freq. of 0 ppm: 600.550023 MHz  
processed size: 262144 complex points  
LB: 0.000 GF: 0.0000  
Hz/cm: 15.977 ppm/cm: 0.02660

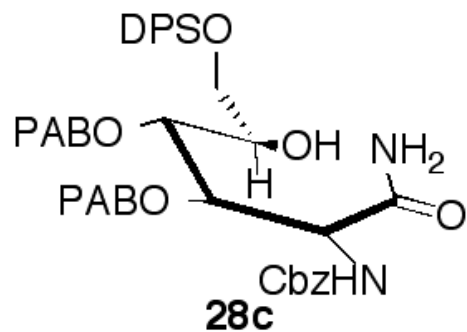

w Rf lactone in CD3OD

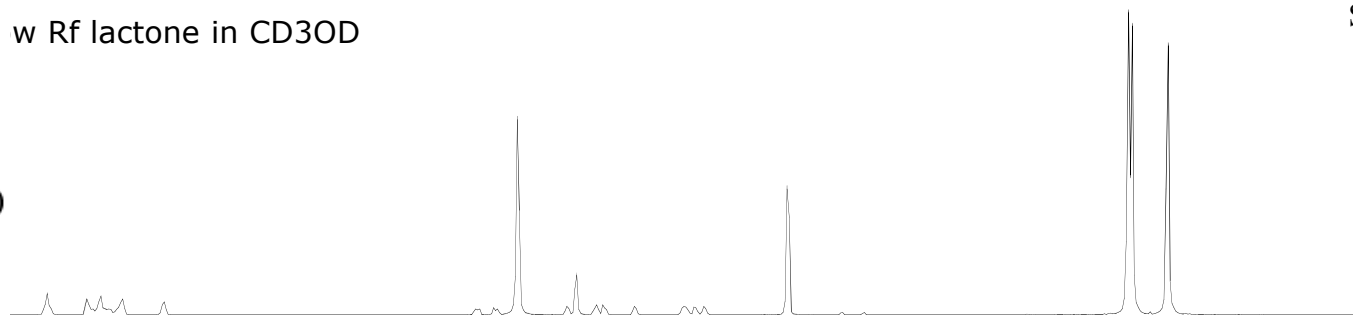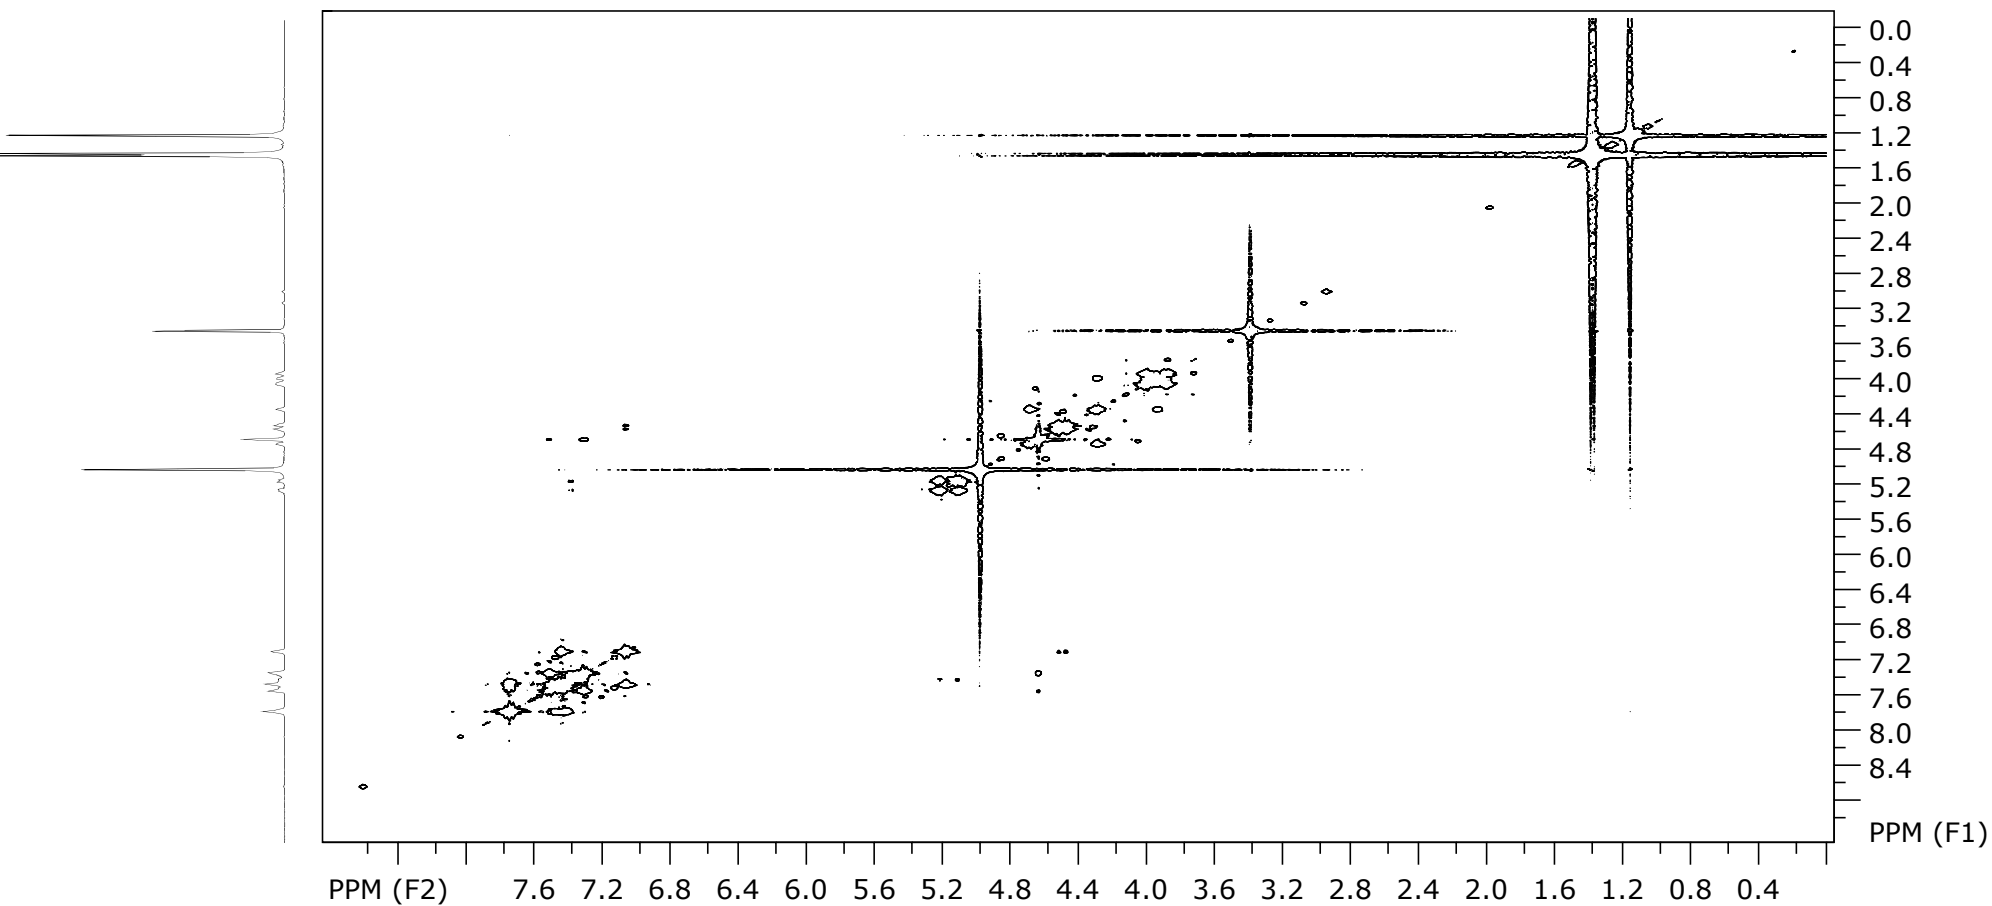

file: ...lder\NMR Data\AmFrHi\_pk1COSY\1\ser  
 expt: <cosygpqf>  
 transmitter freq: 600.552832 MHz  
 time domain size: 2048 by 1024 points  
 width (F2): 7211.54 Hz = 12.0082 ppm = 3.5213 Hz/pt  
 number of scans: 2

F2: freq. of 0 ppm: 600.5499623 MHz  
 processed size: 1024 complex points  
 window function: Sine  
 shift: 0.0 degrees  
 Hz/cm: 267.023 ppm/cm: 0.44463

F1: freq. of 0 ppm: 600.5499623 MHz  
 processed size: 1024 complex points  
 window function: Sine  
 shift: 0.0 degrees  
 Hz/cm: 516.915 ppm/cm: 0.86073

low Rf lactone in CD3OD

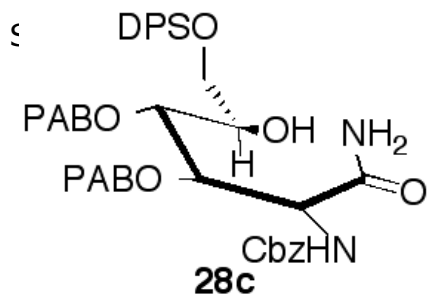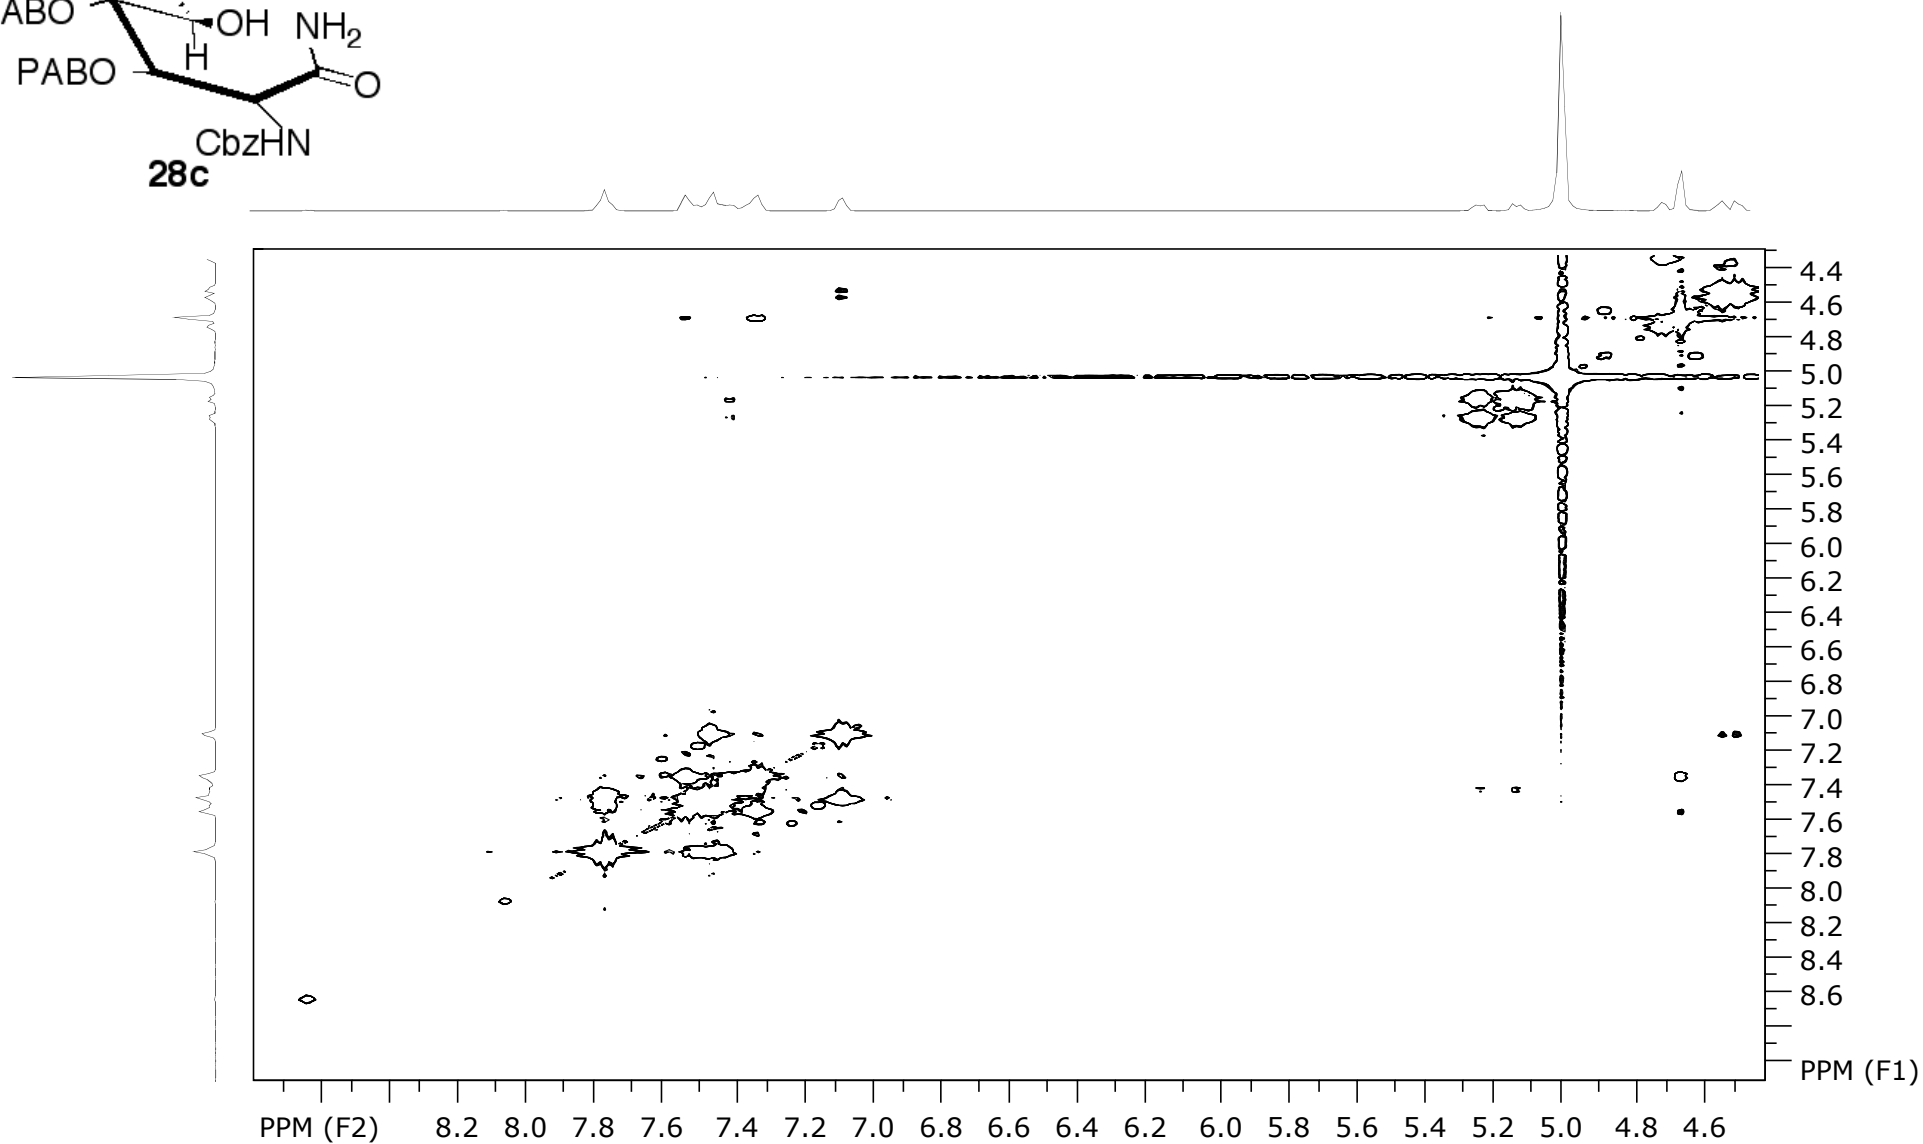

file: ...lder\NMR Data\AmFrHi\_pk1COSY\1\ser  
 expt: <cosygpqf>  
 transmitter freq: 600.552832 MHz  
 time domain size: 2048 by 1024 points  
 width (F2): 7211.54 Hz = 12.0082 ppm = 3.5213 Hz/pt  
 number of scans: 2

F2: freq. of 0 ppm: 600.5499623 MHz  
 processed size: 1024 complex points  
 window function: Sine  
 shift: 0.0 degrees  
 Hz/cm: 131.274 ppm/cm: 0.21859

F1: freq. of 0 ppm: 600.5499623 MHz  
 processed size: 1024 complex points  
 window function: Sine  
 shift: 0.0 degrees  
 Hz/cm: 263.394 ppm/cm: 0.43859

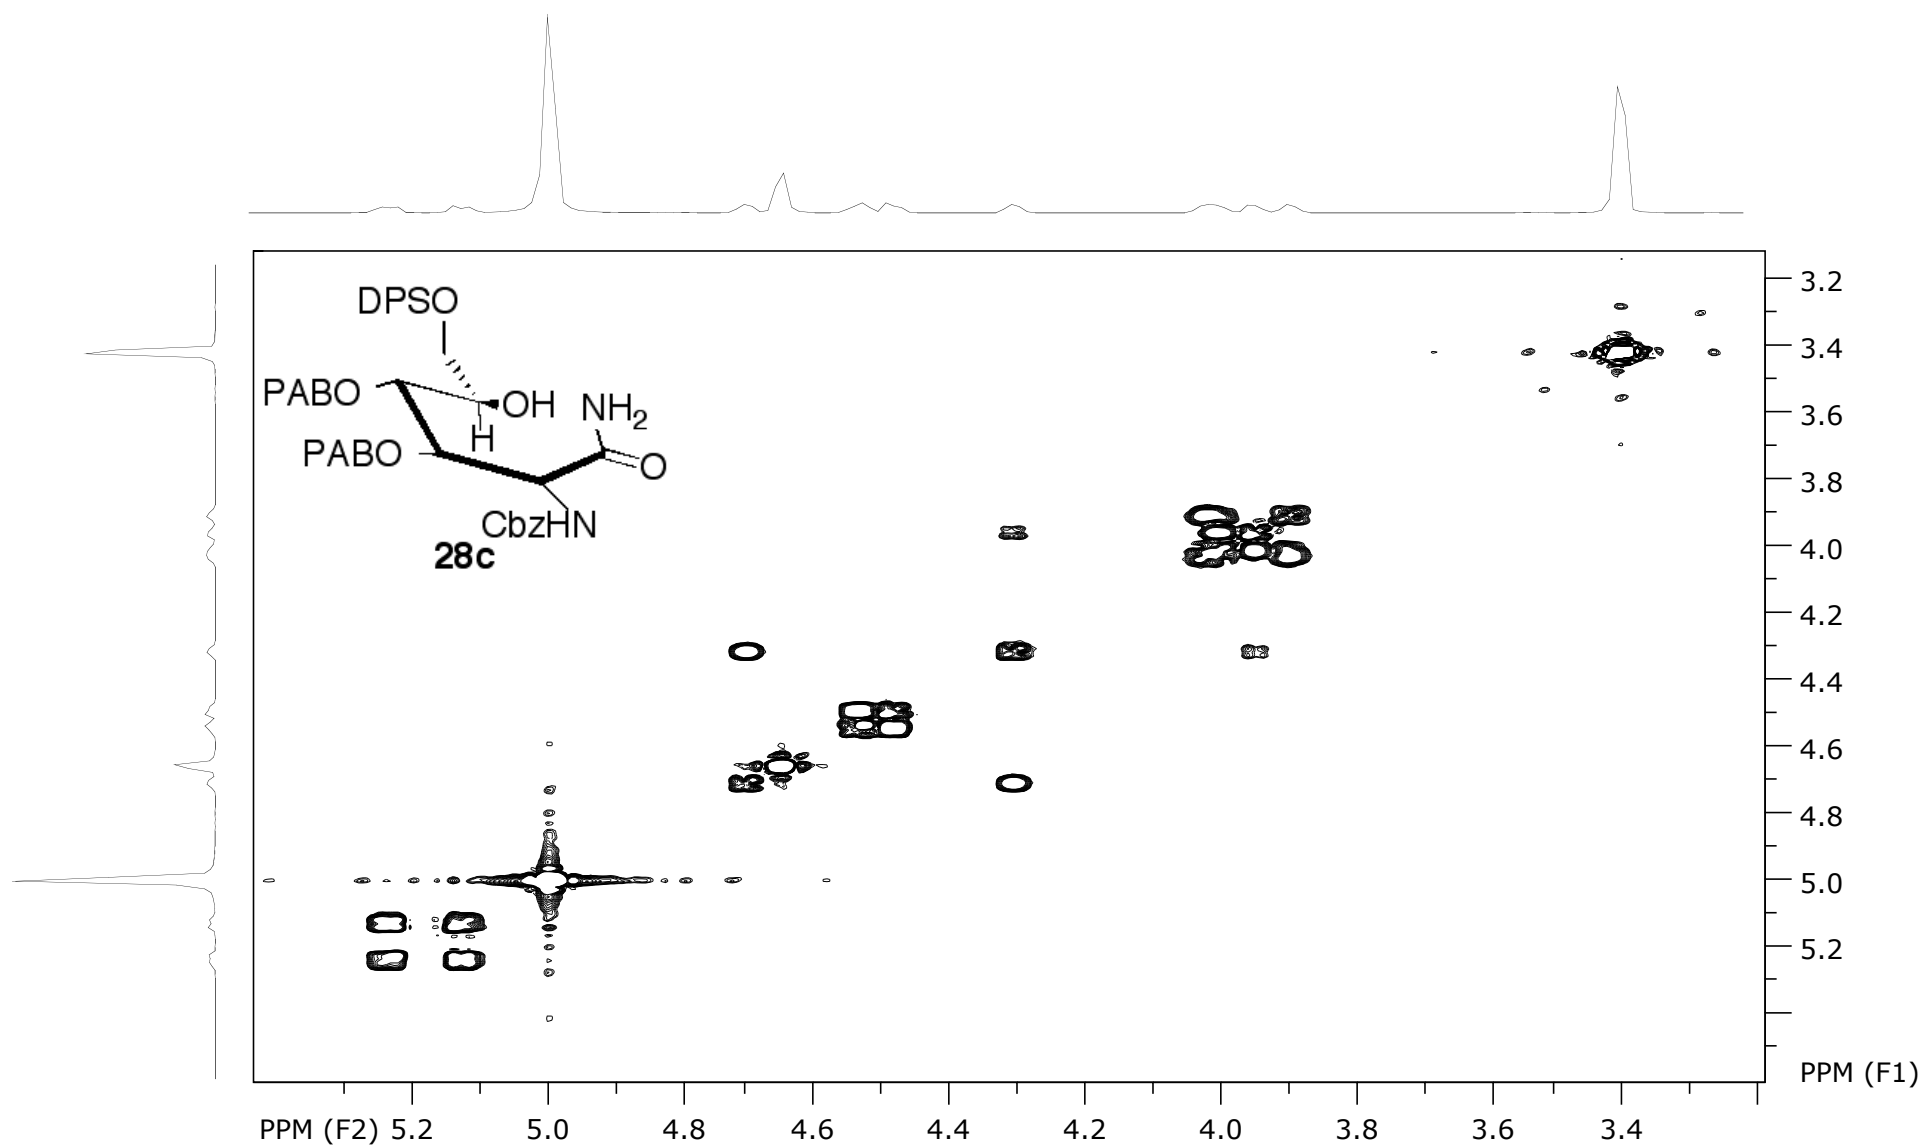

file: ...lder\NMR Data\AmFrHi\_pk1COSY\1\ser  
expt: <cosygpqf>  
transmitter freq: 600.552832 MHz  
time domain size: 2048 by 1024 points  
width (F2): 7211.54 Hz = 12.0082 ppm = 3.5213 Hz/pt  
number of scans: 2

F2: freq. of 0 ppm: 600.5499623 MHz  
processed size: 1024 complex points  
window function: Sine  
shift: 0.0 degrees  
Hz/cm: 67.332 ppm/cm: 0.11212

F1: freq. of 0 ppm: 600.5499623 MHz  
processed size: 1024 complex points  
window function: Sine  
shift: 0.0 degrees  
Hz/cm: 135.949 ppm/cm: 0.22637

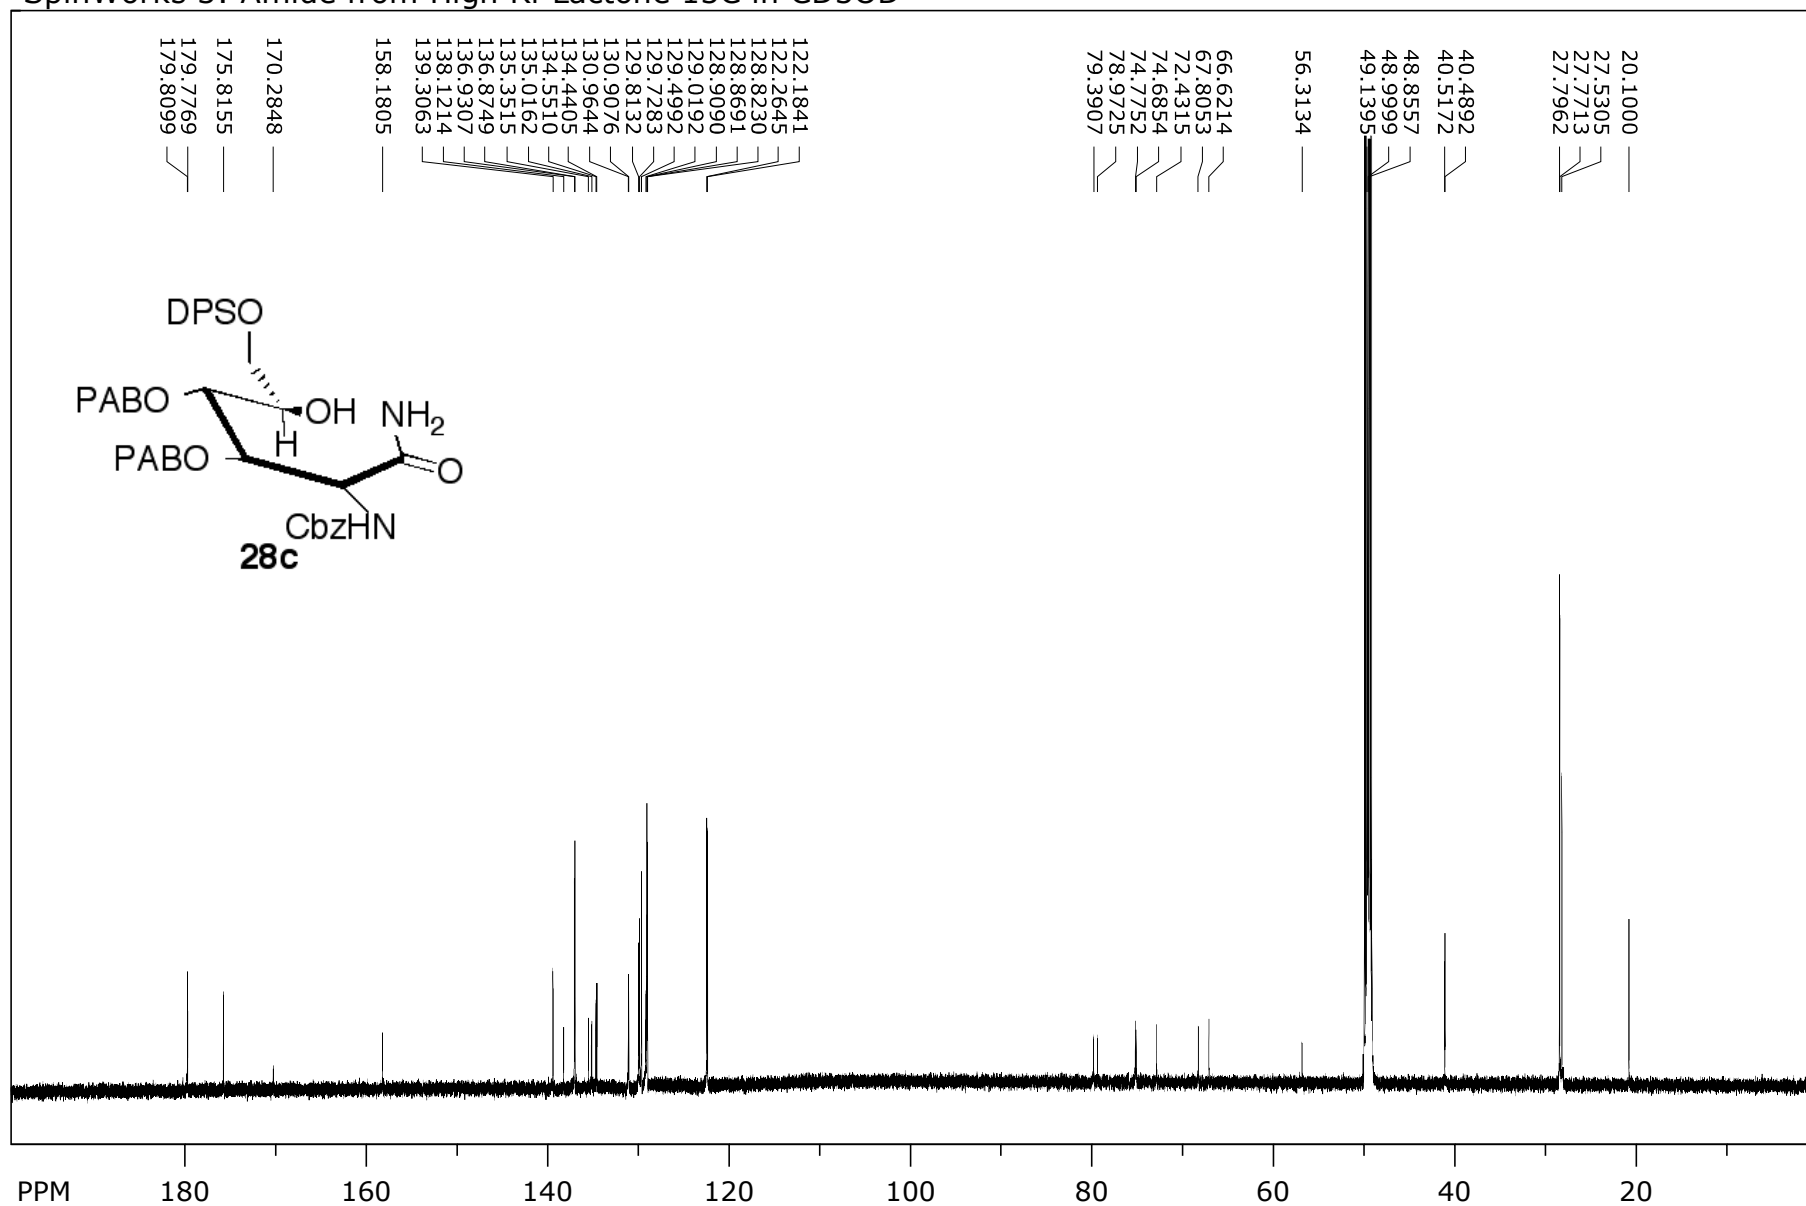

file: ...NMR Data\AmFrHi\_pk1\_13CCD3OD\2\fid exp: <zggp30>  
 transmitter freq.: 151.023518 MHz  
 time domain size: 65536 points  
 width: 36057.69 Hz = 238.7555 ppm = 0.550197 Hz/pt  
 number of scans: 15360

freq. of 0 ppm: 151.008207 MHz  
 processed size: 32768 complex points  
 LB: 1.000 GF: 0.0000  
 Hz/cm: 1259.307 ppm/cm: 8.33848

|               |                      |             |                      |                 |              |                        |                      |
|---------------|----------------------|-------------|----------------------|-----------------|--------------|------------------------|----------------------|
| Sample Name   | Jeff-32              | Position    | Vial 18              | Instrument Name | Instrument 1 | User Name              | DYL                  |
| Inj Vol       | 2                    | InjPosition |                      | SampleType      | Unknown      | IRM Calibration Status | Some Ions Missed     |
| Data Filename | C18_Elution2_S32_Jef | ACQ Method  | C18 waters symmetry2 | Comment         |              | Acquired Time          | 9/15/2012 7:25:59 AM |

9-146

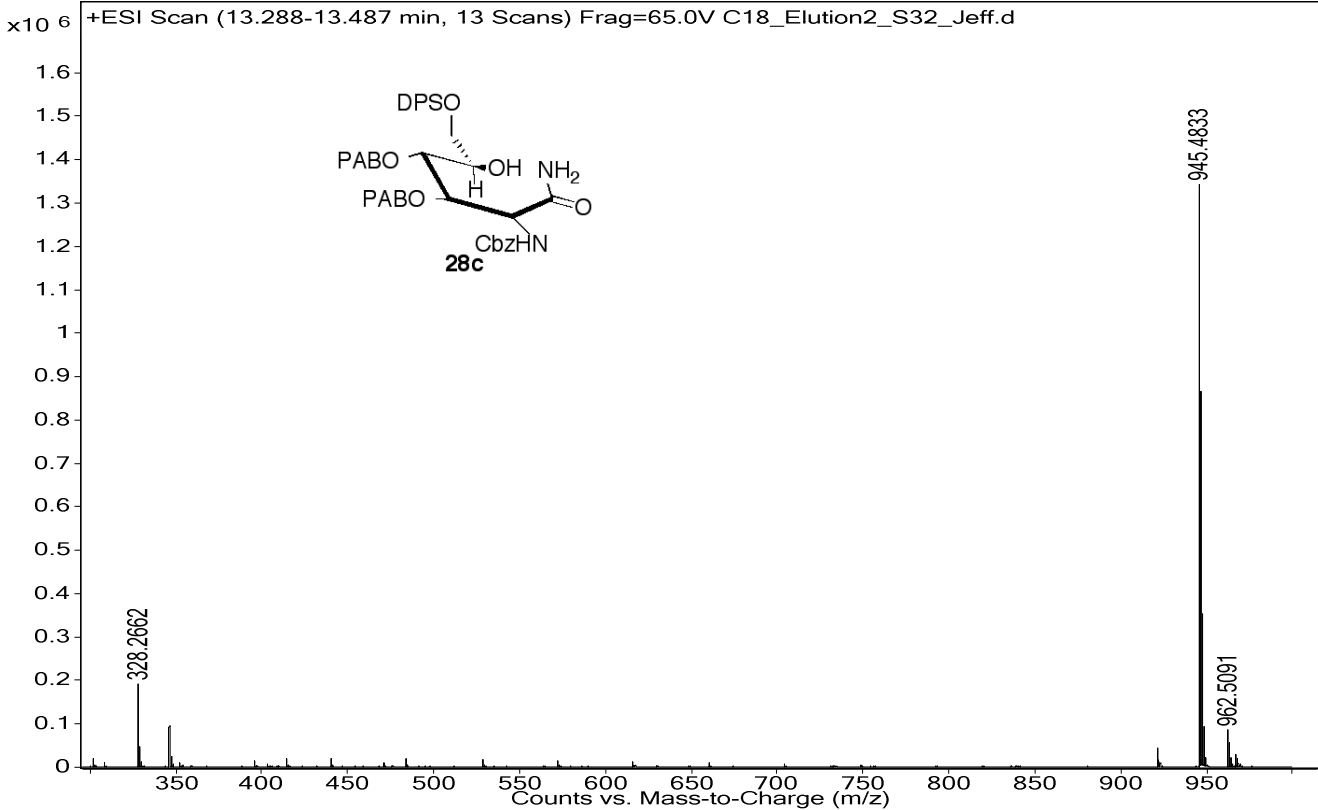



Peak 2 from CH3CN/H2O HPLC; in d6-acetone

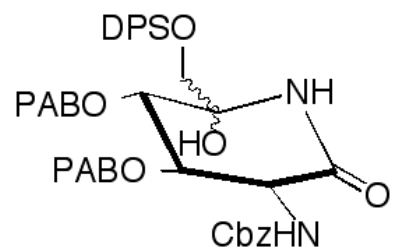**29a**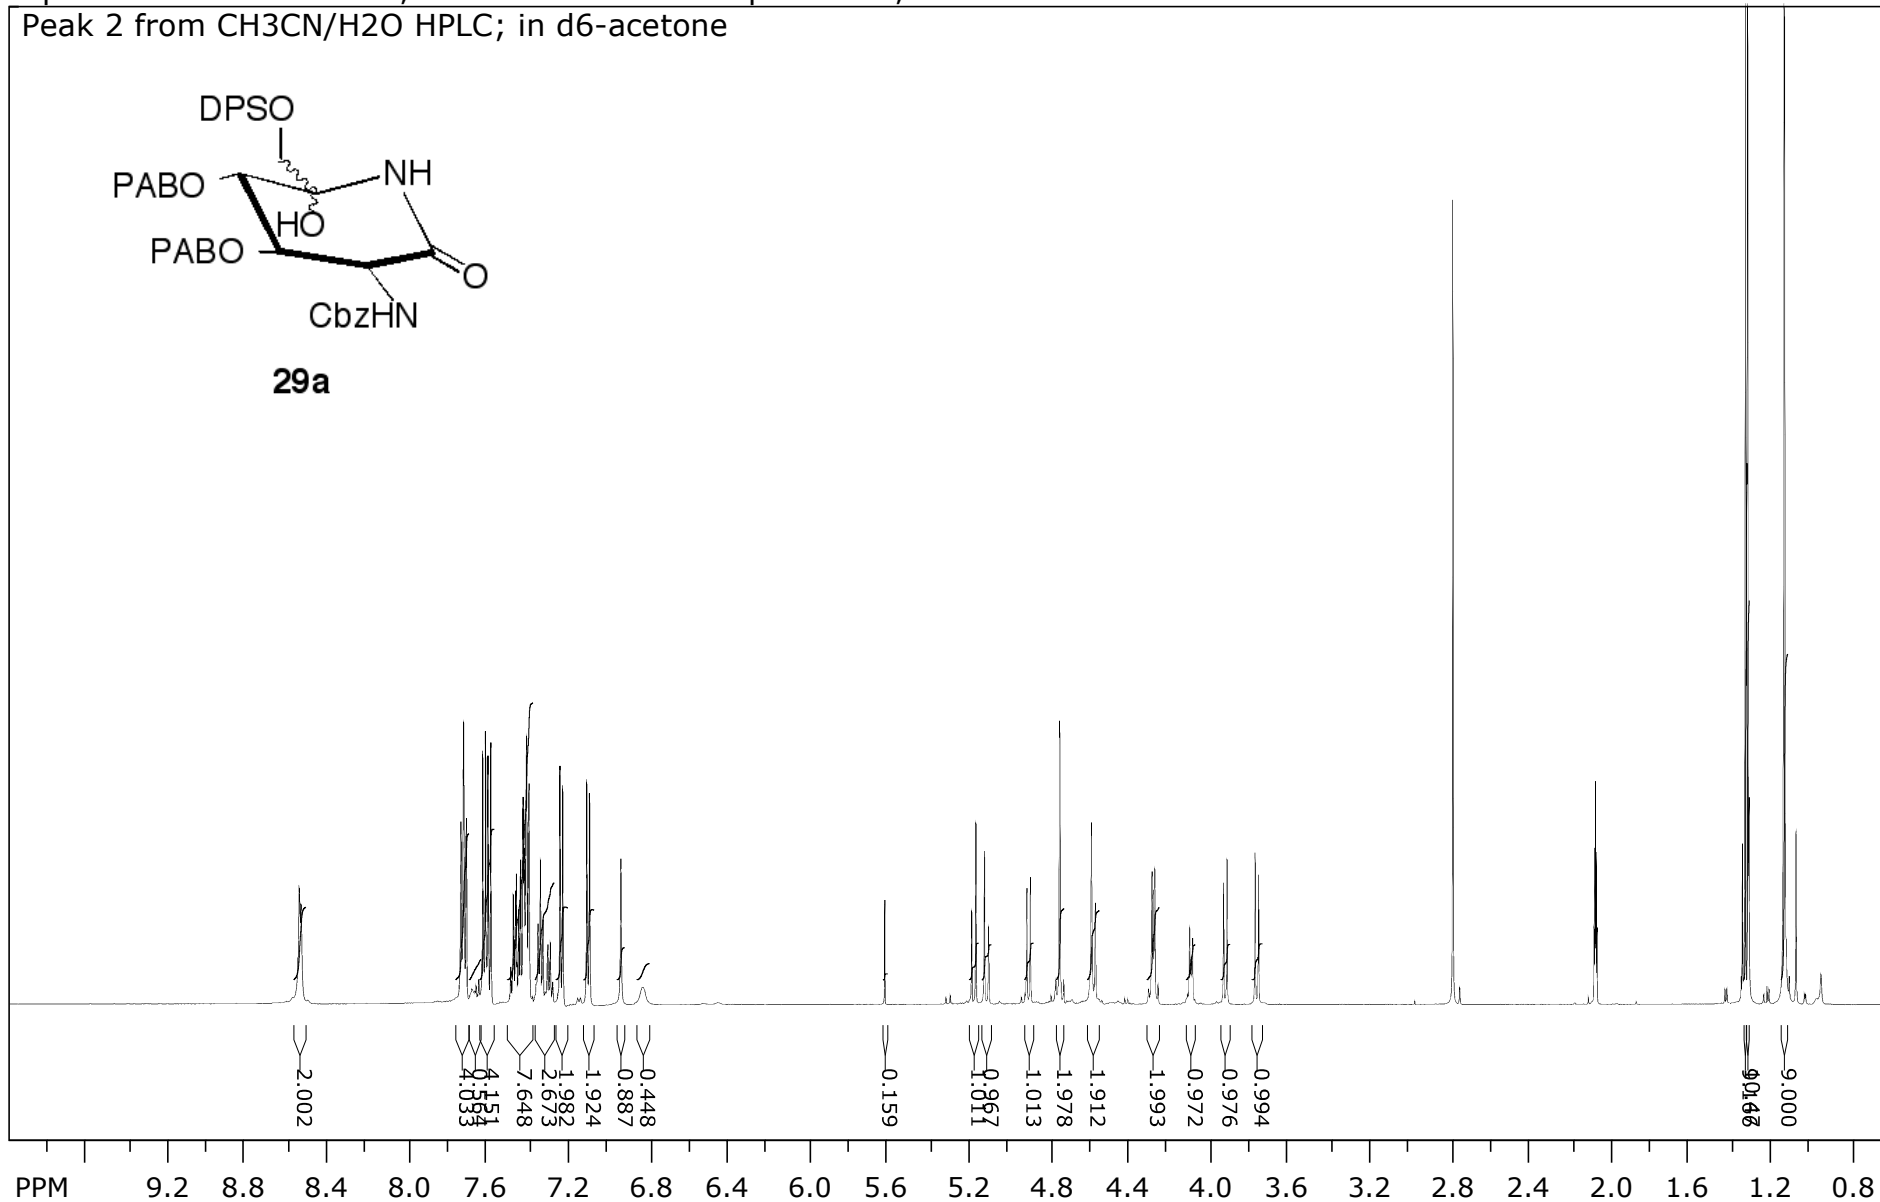

file: ...\\NMR Data\\OxAm055\_pk2\_d6Acet\\1\\fid expt: <zgpr>  
transmitter freq.: 600.553538 MHz  
time domain size: 65536 points  
width: 8417.51 Hz = 14.0162 ppm = 0.128441 Hz/pt  
number of scans: 32

freq. of 0 ppm: 600.550010 MHz  
processed size: 262144 complex points  
LB: 0.000 GF: 0.0000  
Hz/cm: 226.443 ppm/cm: 0.37706

Peak 2 from CH3CN/H2O HPLC; in d6-acetone

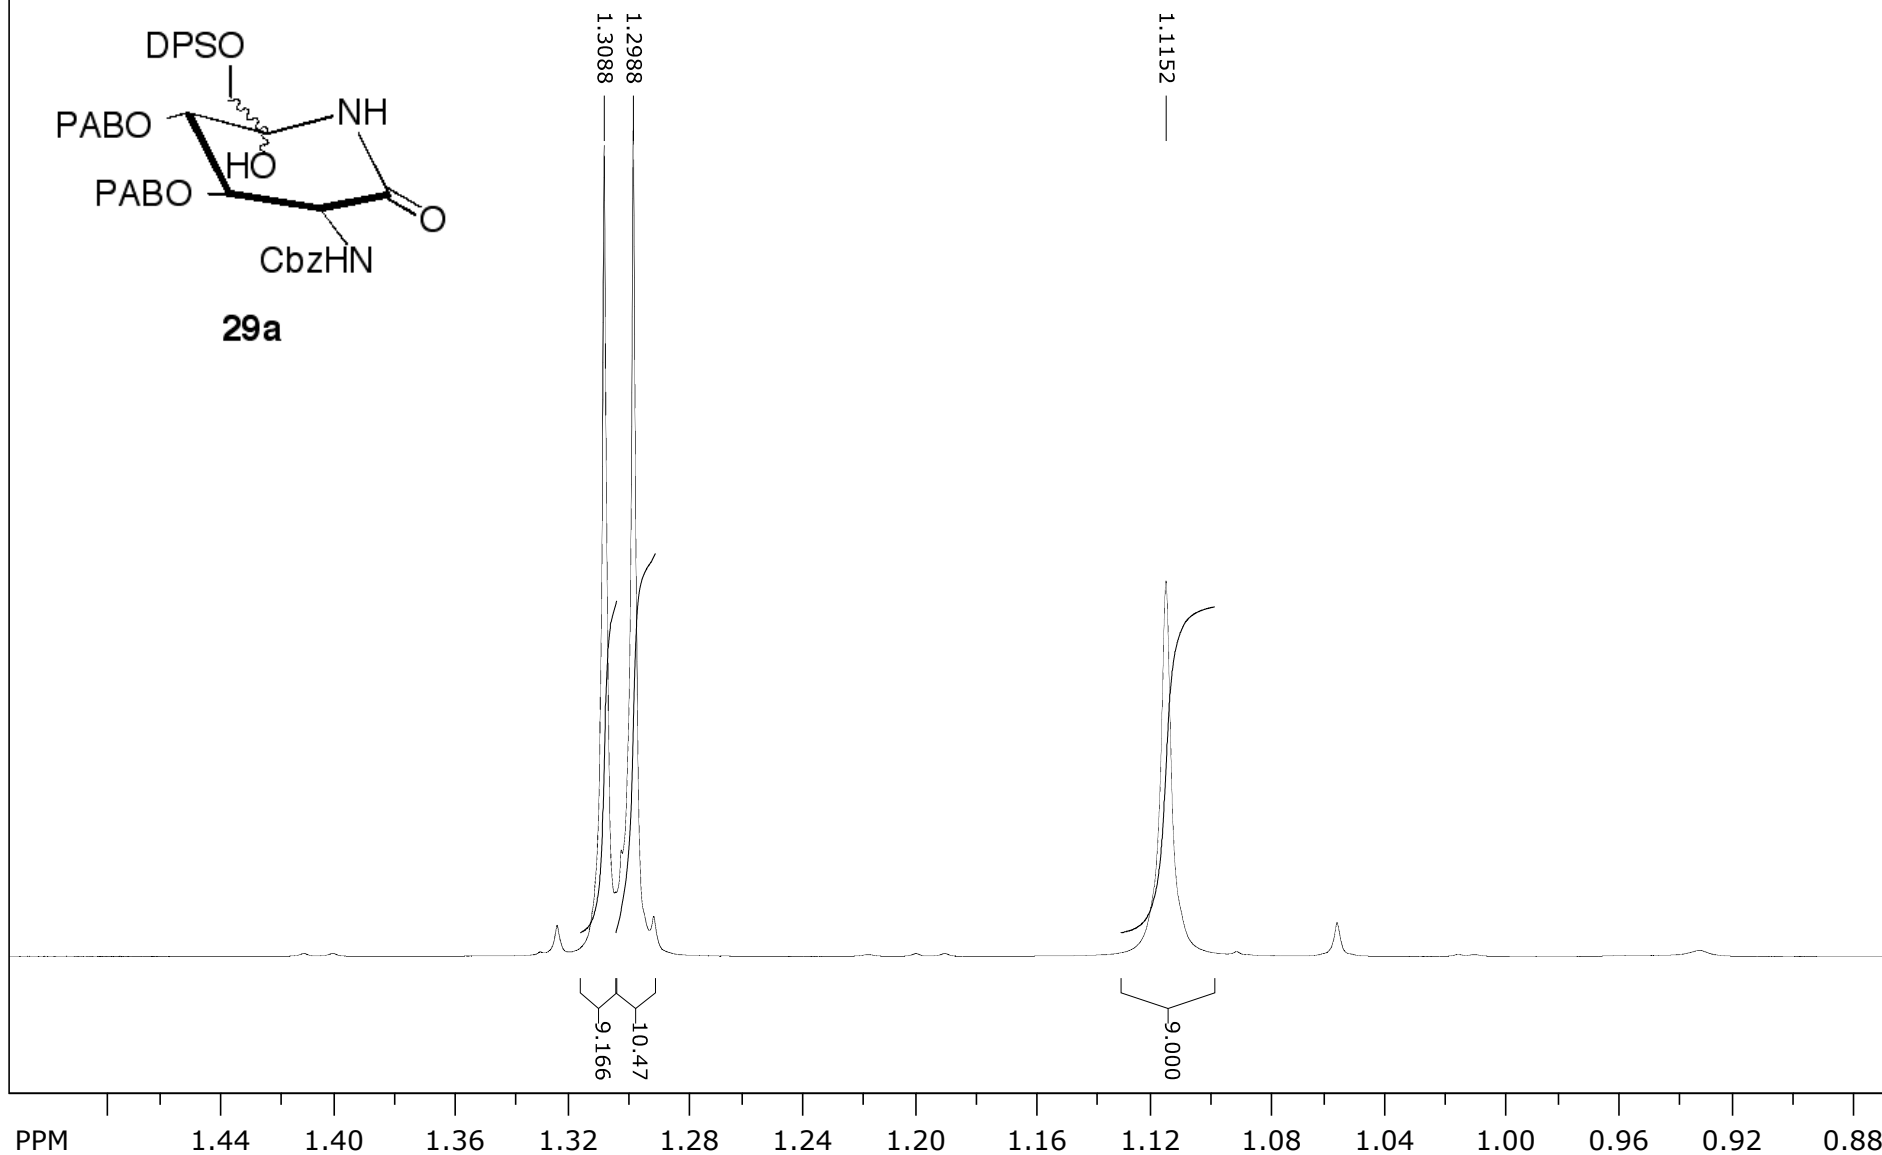

file: ...\\NMR Data\\OxAm055\_pk2\_d6Acet\\1\\fid expt: <zgpr>  
transmitter freq.: 600.553538 MHz  
time domain size: 65536 points  
width: 8417.51 Hz = 14.0162 ppm = 0.128441 Hz/pt  
number of scans: 32

freq. of 0 ppm: 600.550010 MHz  
processed size: 262144 complex points  
LB: 0.000 GF: 0.0000  
Hz/cm: 15.578 ppm/cm: 0.02594

Peak 2 from CH3CN/H2O HPLC; in d6-acetone

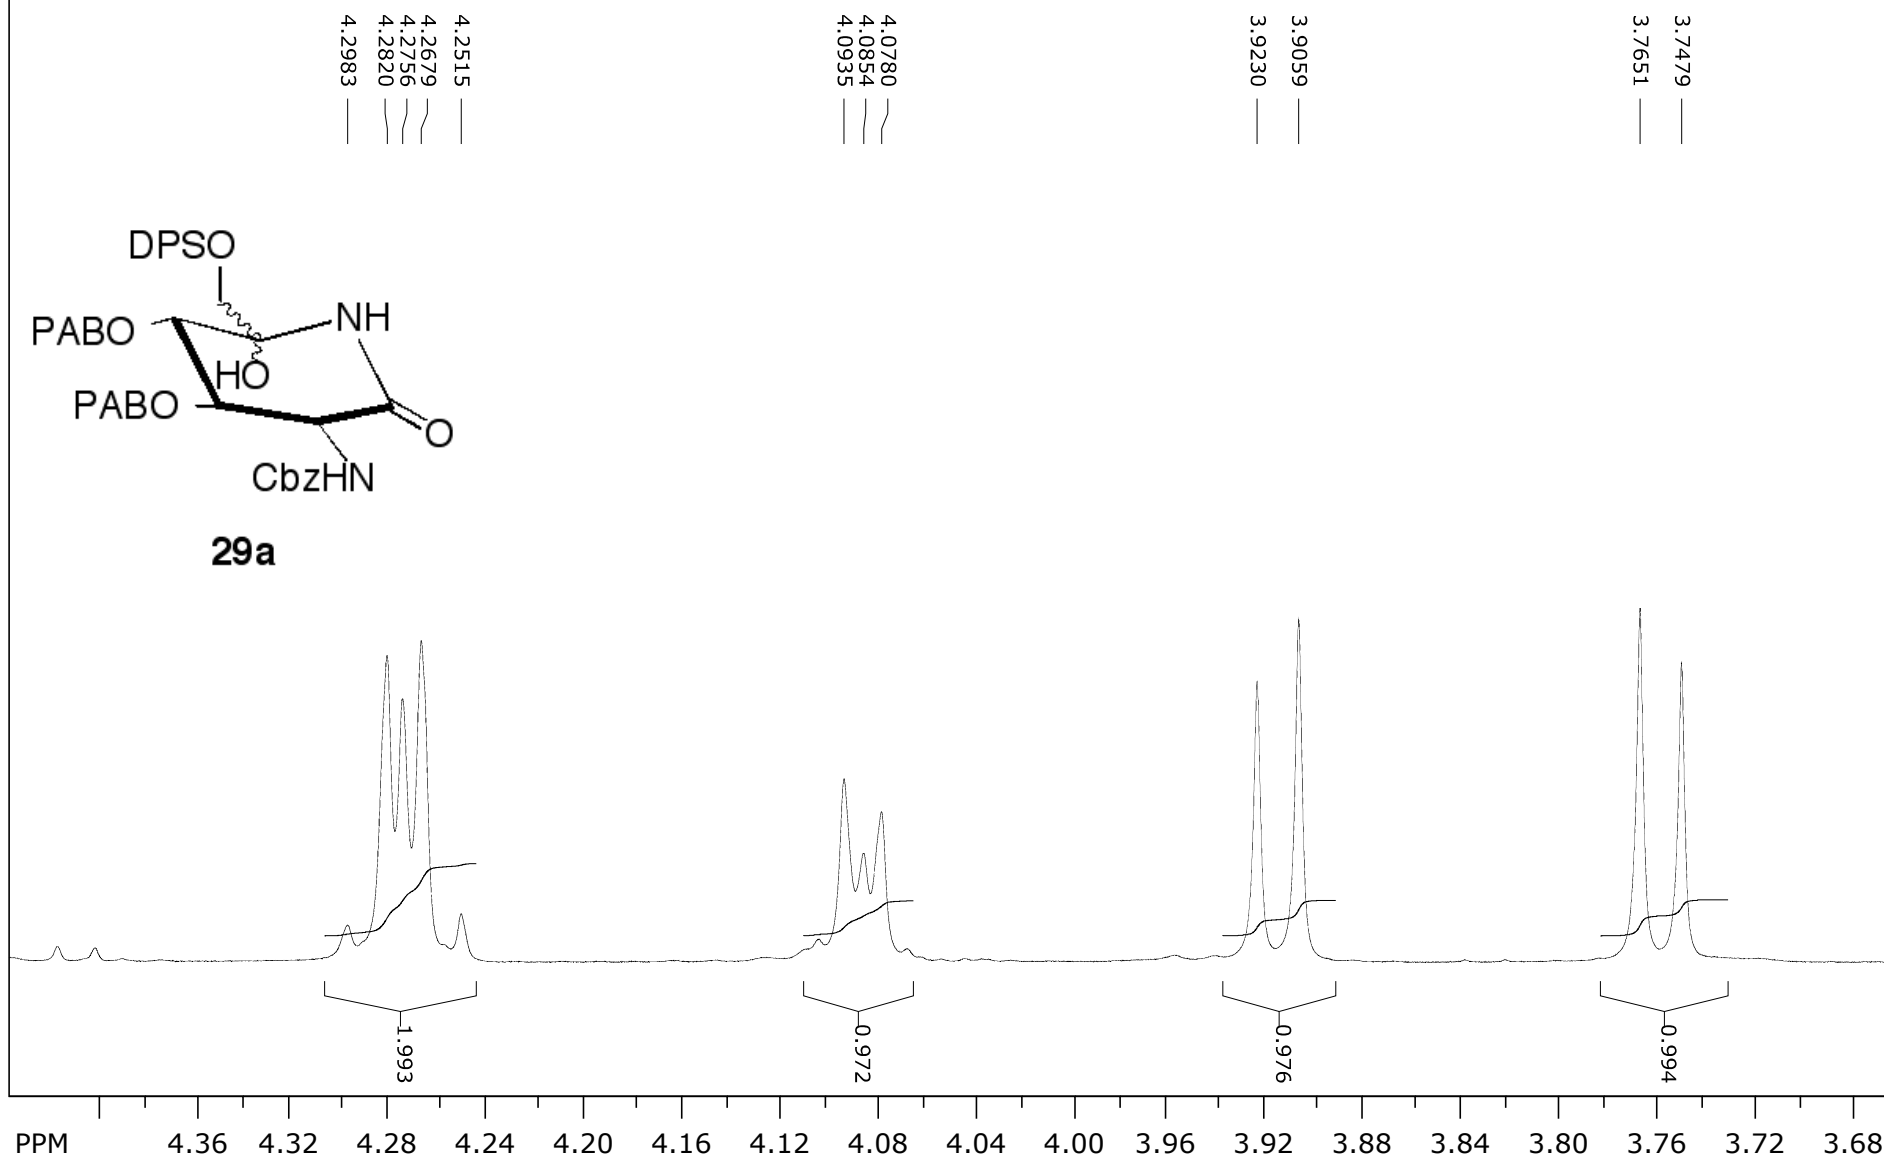

file: ...\\NMR Data\\OxAm055\_pk2\_d6Acet\\1\\fid expt: <zgpr>  
transmitter freq.: 600.553538 MHz  
time domain size: 65536 points  
width: 8417.51 Hz = 14.0162 ppm = 0.128441 Hz/pt  
number of scans: 32

freq. of 0 ppm: 600.550010 MHz  
processed size: 262144 complex points  
LB: 0.000 GF: 0.0000  
Hz/cm: 18.653 ppm/cm: 0.03106

Peak 2 from CH3CN/H2O HPLC; in d6-acetone

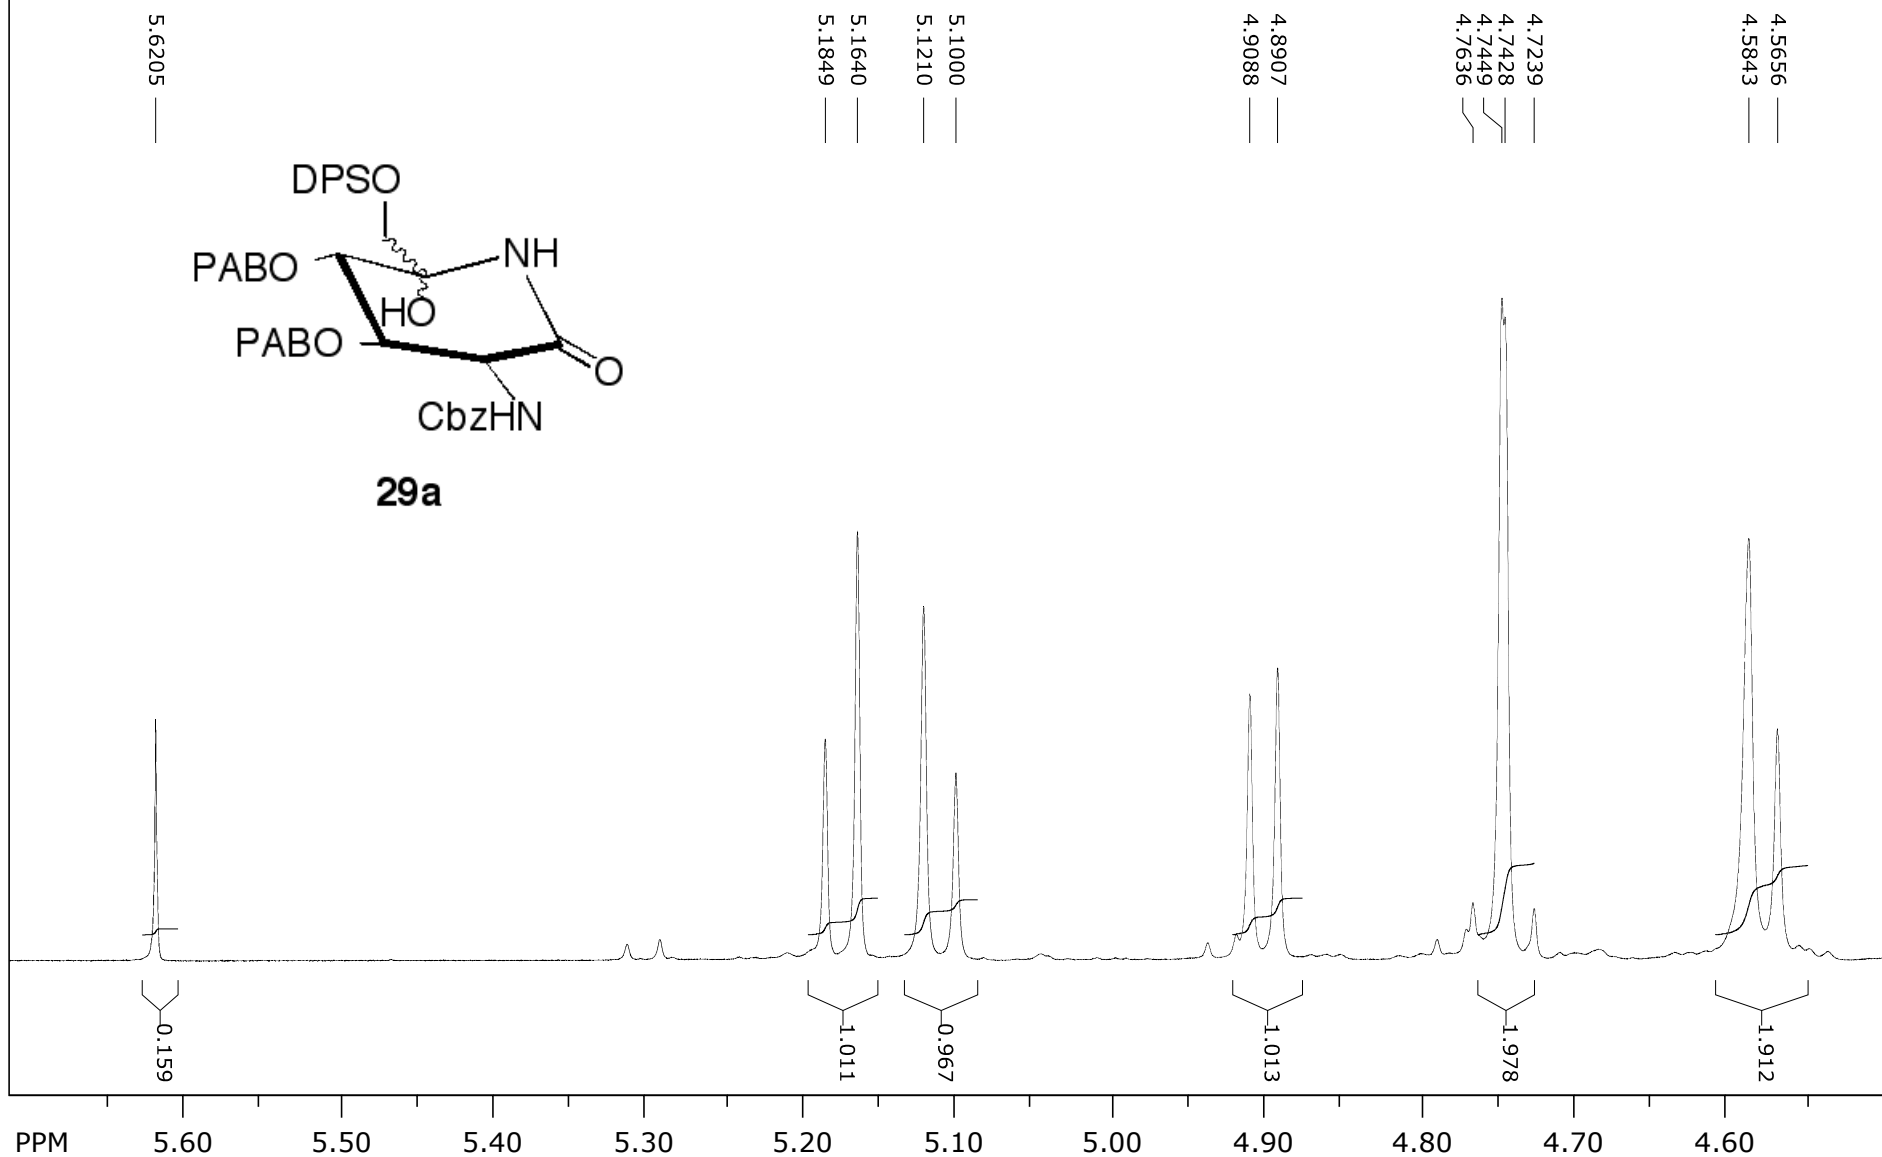

file: ...\\NMR Data\\OxAm055\_pk2\_d6Acet\\1\\fid expt: <zgpr>  
transmitter freq.: 600.553538 MHz  
time domain size: 65536 points  
width: 8417.51 Hz = 14.0162 ppm = 0.128441 Hz/pt  
number of scans: 32

freq. of 0 ppm: 600.550010 MHz  
processed size: 262144 complex points  
LB: 0.000 GF: 0.0000  
Hz/cm: 29.406 ppm/cm: 0.04897

Peak 2 from CH3CN/H2O HPLC; in d6-acetone

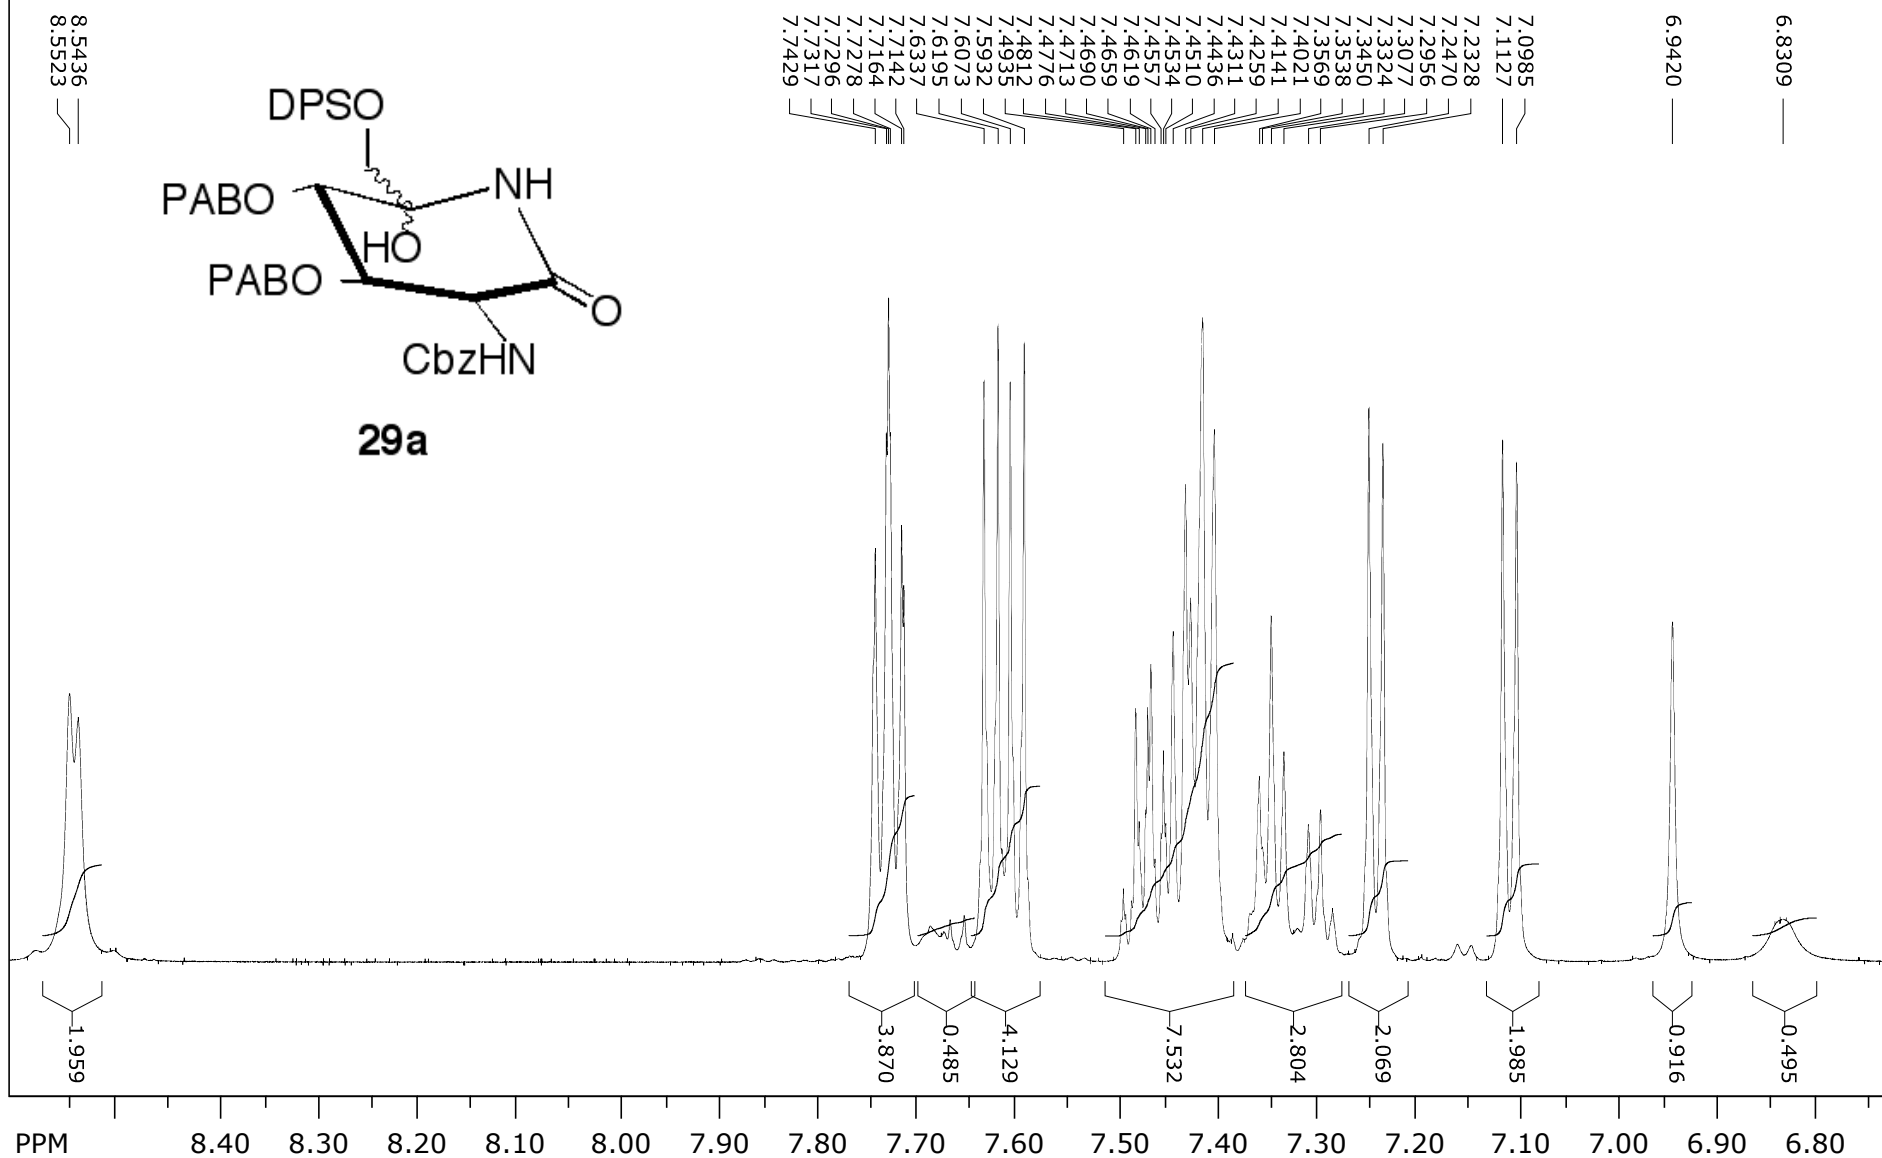

file: ...\\NMR Data\\OxAm055\_pk2\_d6Acet\\1\\fid expt: <zgpr>  
transmitter freq.: 600.553538 MHz  
time domain size: 65536 points  
width: 8417.51 Hz = 14.0162 ppm = 0.128441 Hz/pt  
number of scans: 32

freq. of 0 ppm: 600.550010 MHz  
processed size: 262144 complex points  
LB: 0.000 GF: 0.0000  
Hz/cm: 45.419 ppm/cm: 0.07563

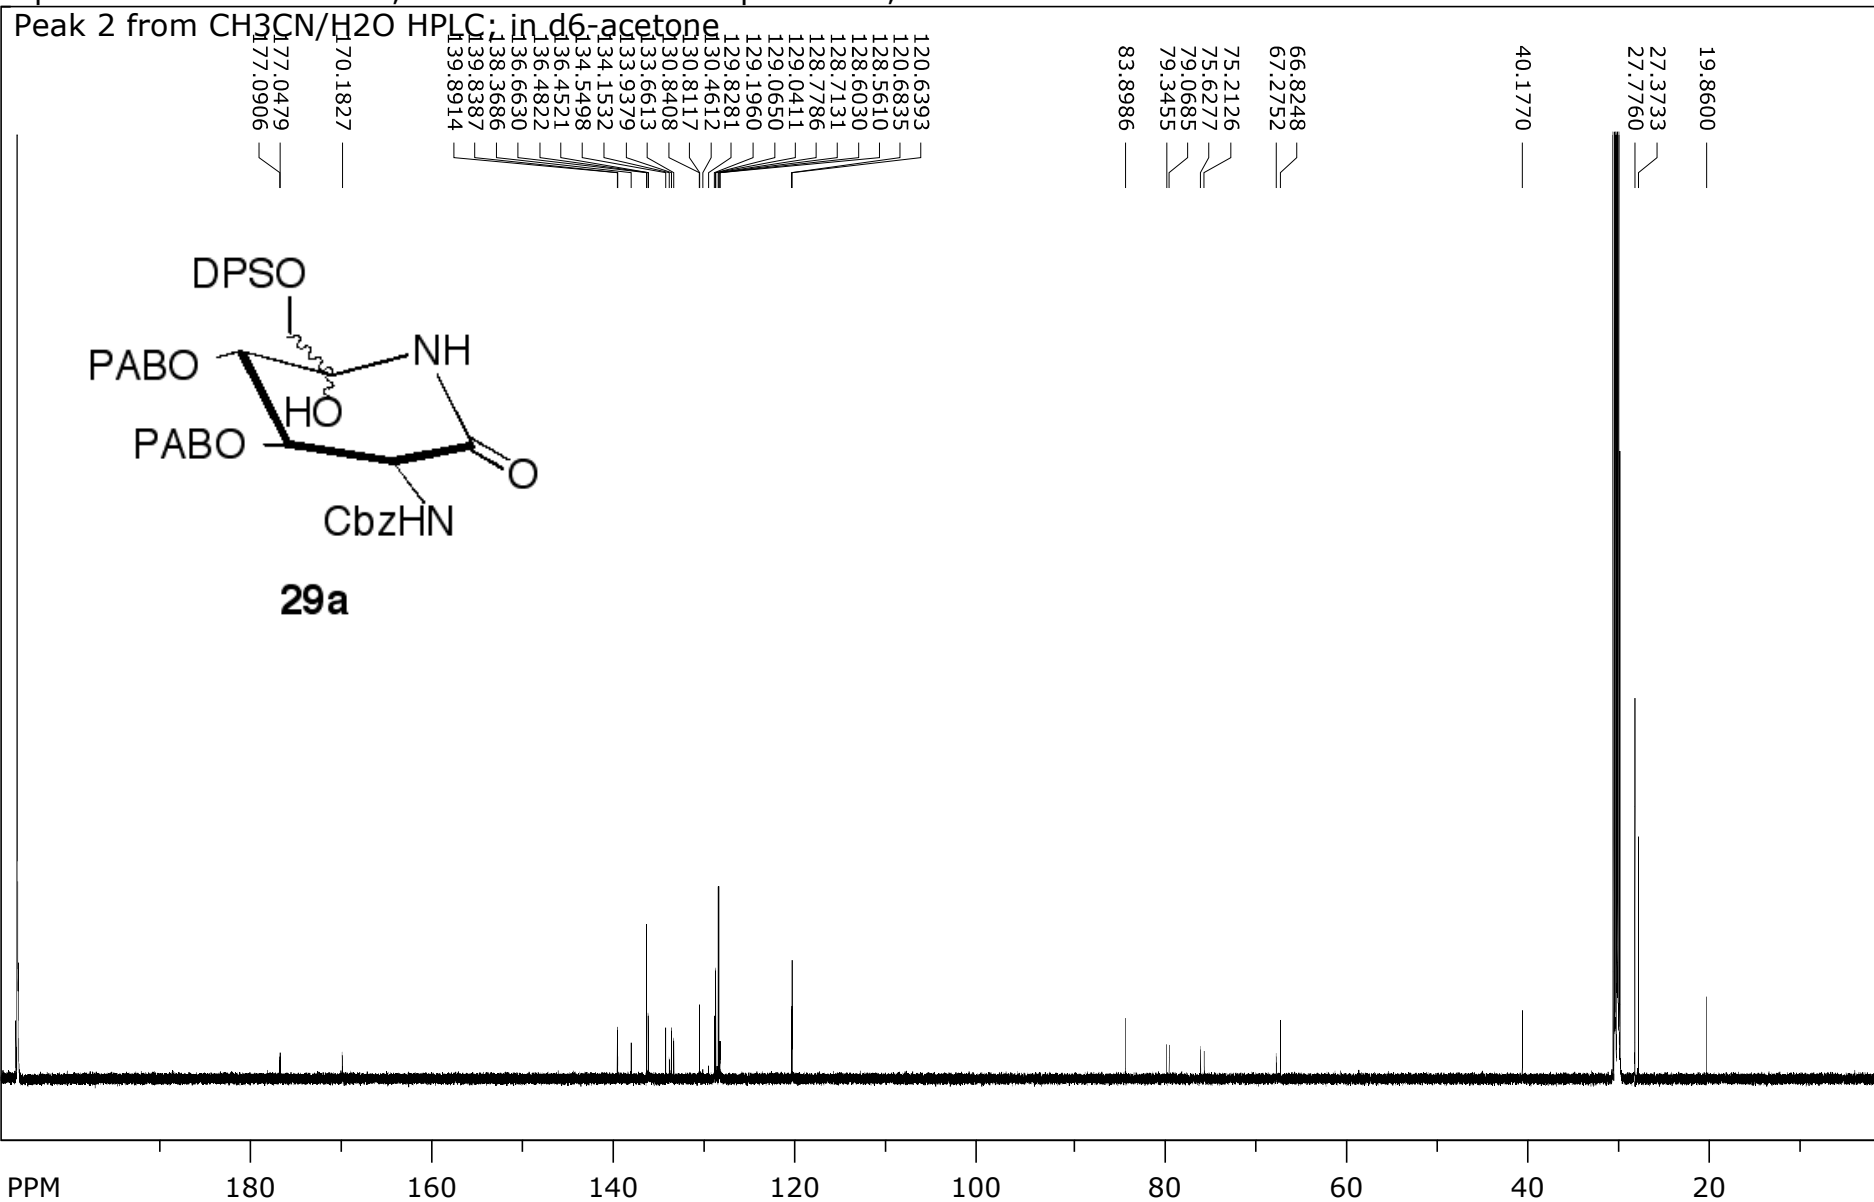

file: ...R Data\OxAm055\_pk2\_13Cd6Acet\1\fid expt: <zgpg30>  
transmitter freq.: 151.023519 MHz  
time domain size: 65536 points  
width: 36057.69 Hz = 238.7555 ppm = 0.550197 Hz/pt  
number of scans: 28672

freq. of 0 ppm: 151.008282 MHz  
processed size: 32768 complex points  
LB: 0.000 GF: 0.0000  
Hz/cm: 1252.593 ppm/cm: 8.29403

2: 6-tBDPS-3,4-PAB2-5-oxo lactam precursor; Rf 0.55 ; Peak 2 ACN/H2O HPLC d6 aceton

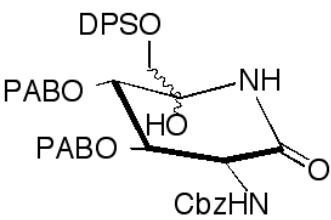

29a

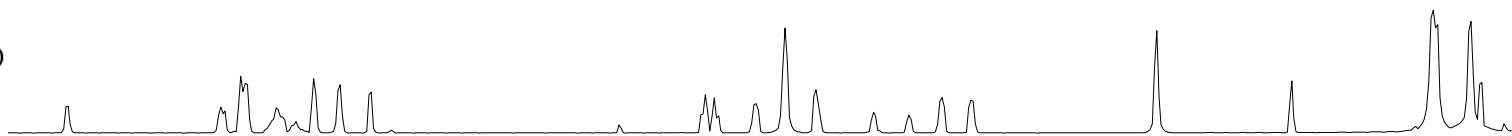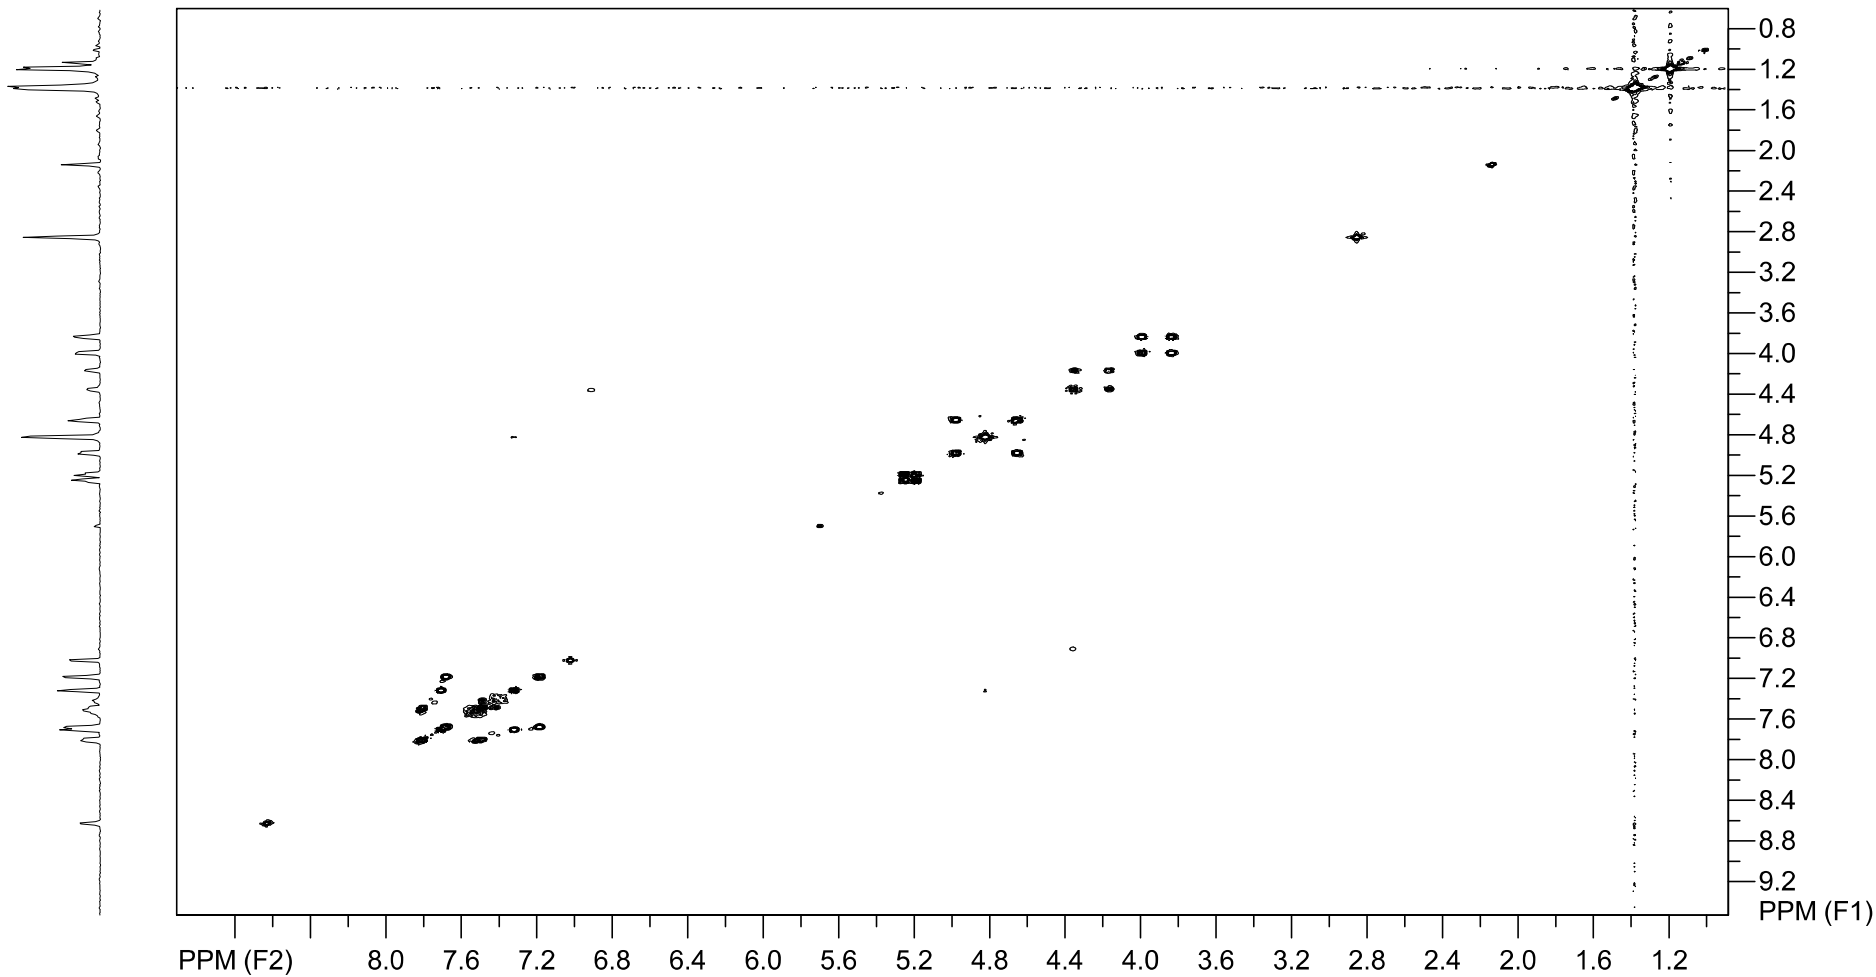

file: C:\Users\Jeff\Documents\NMR Folder\NMR Data\OxAm055pk2\_COSY\1\ser exp: <cosygpqf>  
 transmitter freq.: 600.552832 MHz  
 time domain size: 2048 by 1024 points  
 width (F2): 7211.50 Hz = 12.008167 ppm = 3.521242 Hz/pt  
 number of scans: 2

F2: freq. of 0 ppm: 600.549962 MHz  
 processed size: 1024 complex points  
 window function: Sine  
 shift: 0.0 degrees  
 Hz/cm: 240.911 ppm/cm: 0.40115

F1: freq. of 0 ppm: 600.549962 MHz  
 processed size: 1024 complex points  
 window function: Sine  
 shift: 0.0 degrees  
 Hz/cm: 446.903 ppm/cm: 0.74415

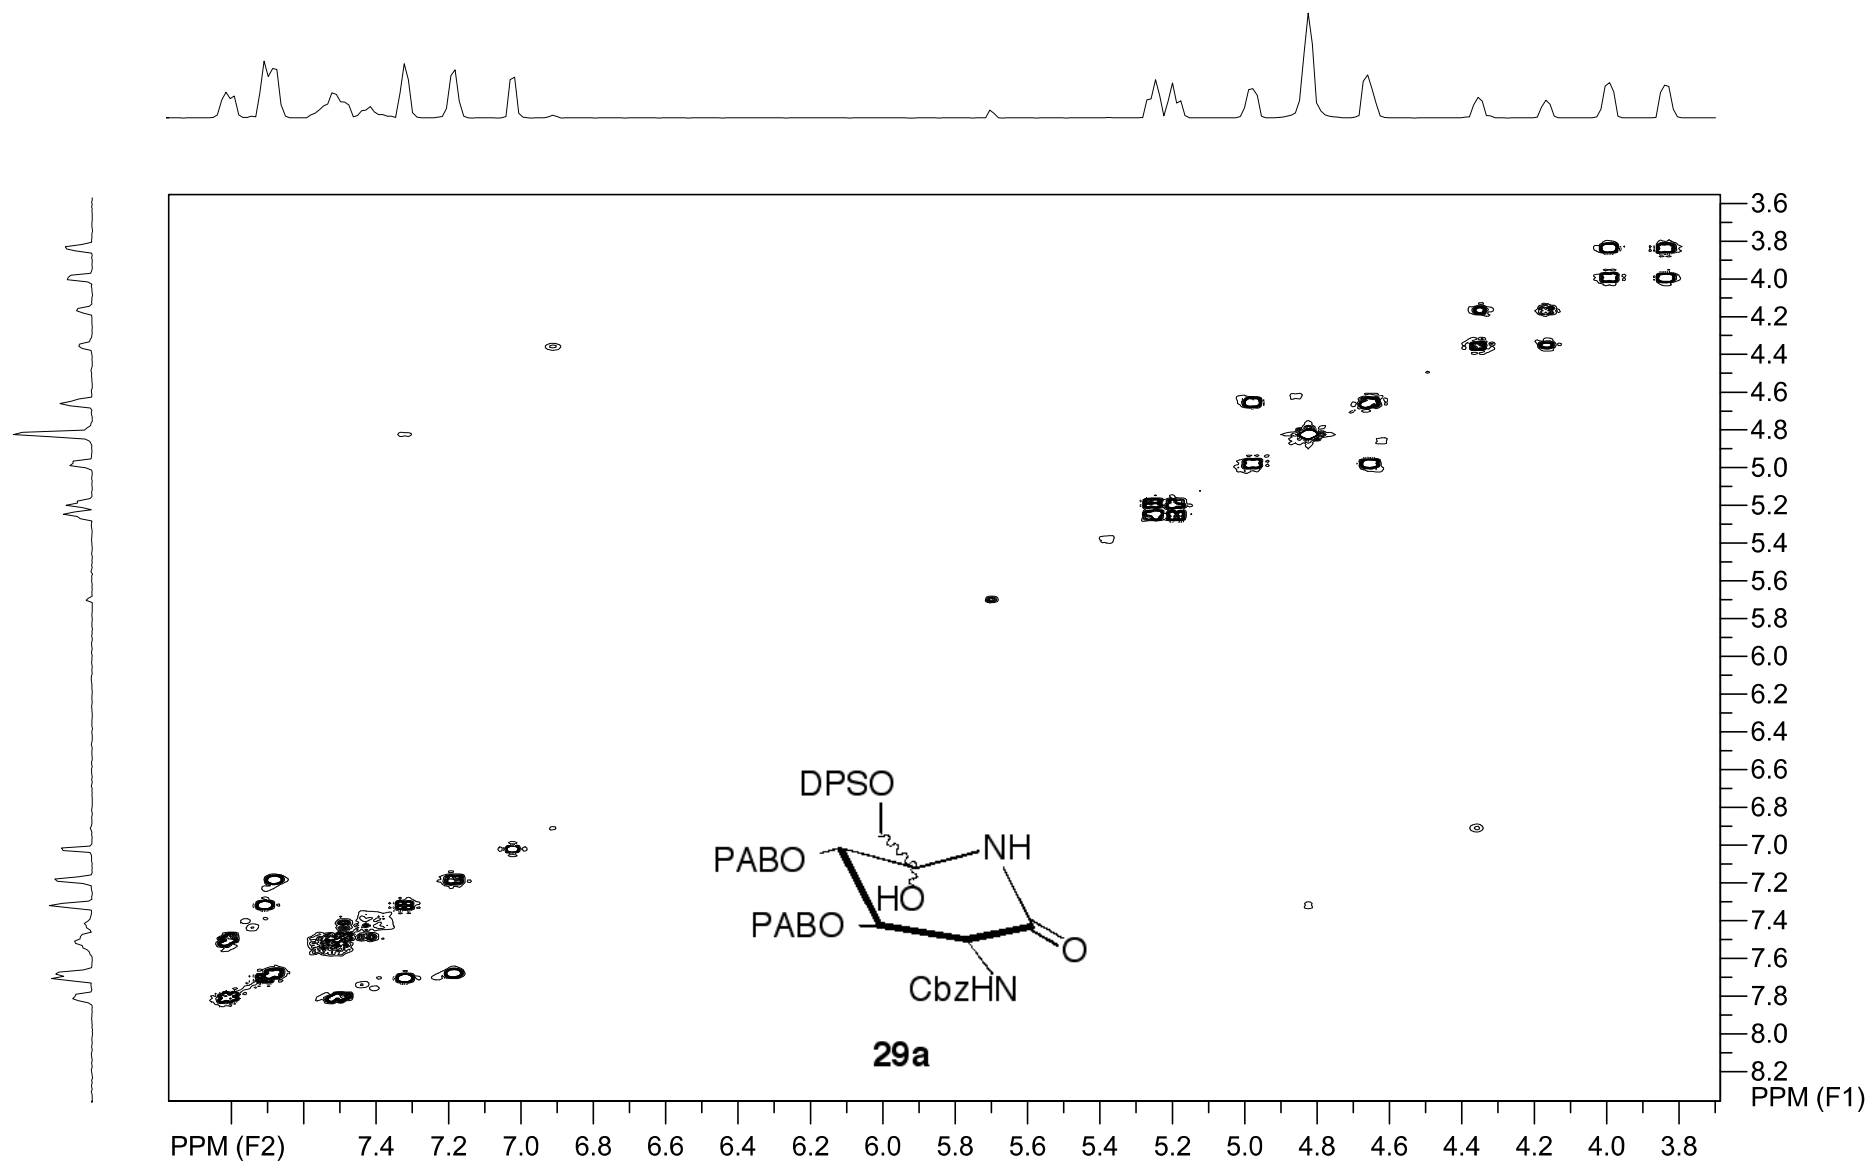

file: C:\Users\Jeff\Documents\NMR Folder\NMR Data\OxAm055pk2\_COSY\1\ser exp: <cosygpqf>  
transmitter freq.: 600.552832 MHz  
time domain size: 2048 by 1024 points  
width (F2): 7211.50 Hz = 12.008167 ppm = 3.521242 Hz/pt  
number of scans: 2

F2: freq. of 0 ppm: 600.549962 MHz  
processed size: 1024 complex points  
window function: Sine  
shift: 0.0 degrees  
Hz/cm: 125.602 ppm/cm: 0.20914

F1: freq. of 0 ppm: 600.549962 MHz  
processed size: 1024 complex points  
window function: Sine  
shift: 0.0 degrees  
Hz/cm: 240.439 ppm/cm: 0.40036



|               |                      |             |                      |                 |              |                        |                      |
|---------------|----------------------|-------------|----------------------|-----------------|--------------|------------------------|----------------------|
| Sample Name   | Sample37 redo        | Position    | Vial 13              | Instrument Name | Instrument 1 | User Name              | DYL                  |
| Inj Vol       | 3                    | InjPosition |                      | SampleType      | Unknown      | IRM Calibration Status | Some Ions Missed     |
| Data Filename | C18_Samp37Redo_Jeff. | ACQ Method  | C18 waters symmetry2 | Comment         |              | Acquired Time          | 9/20/2012 8:13:26 AM |

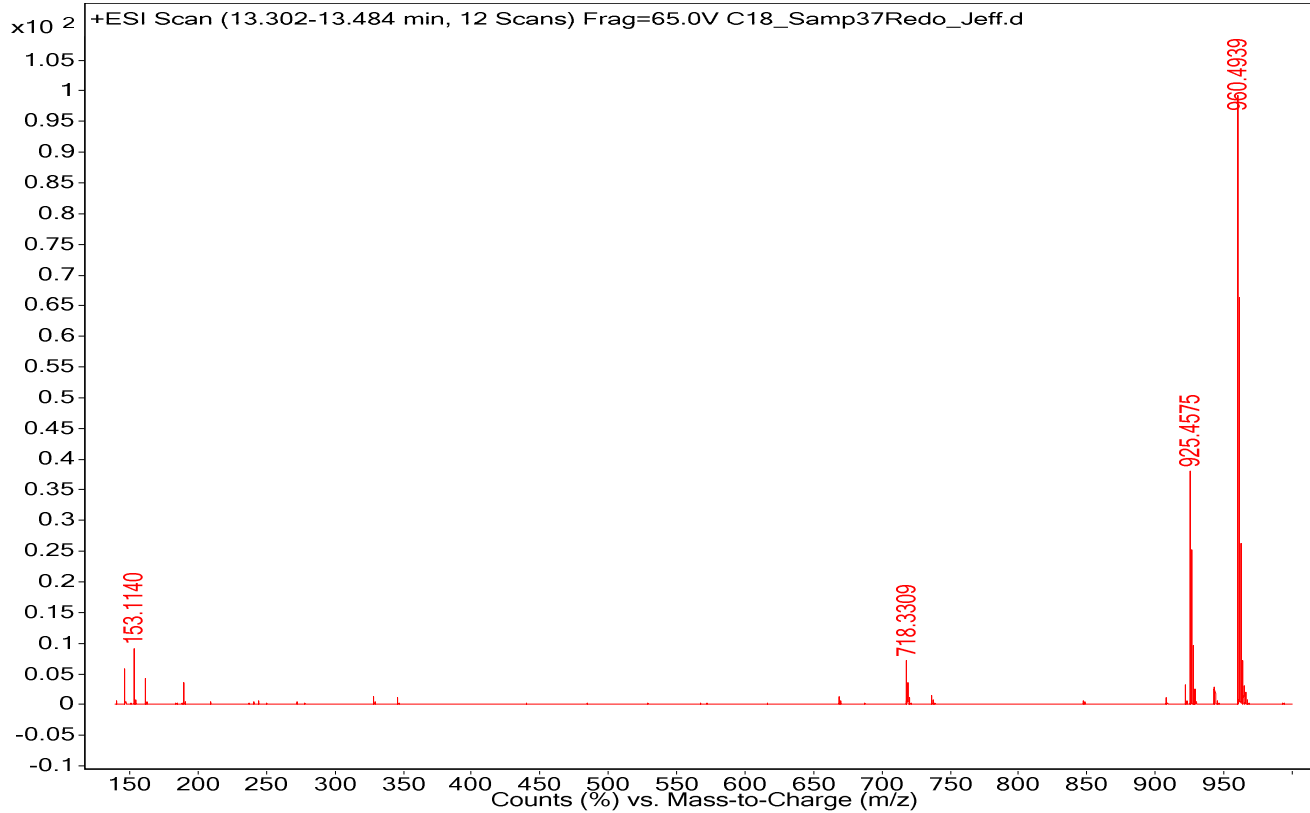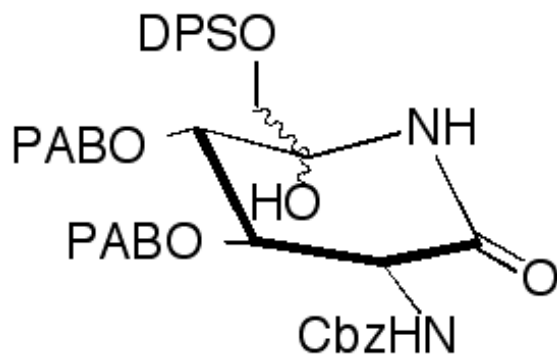**29a**



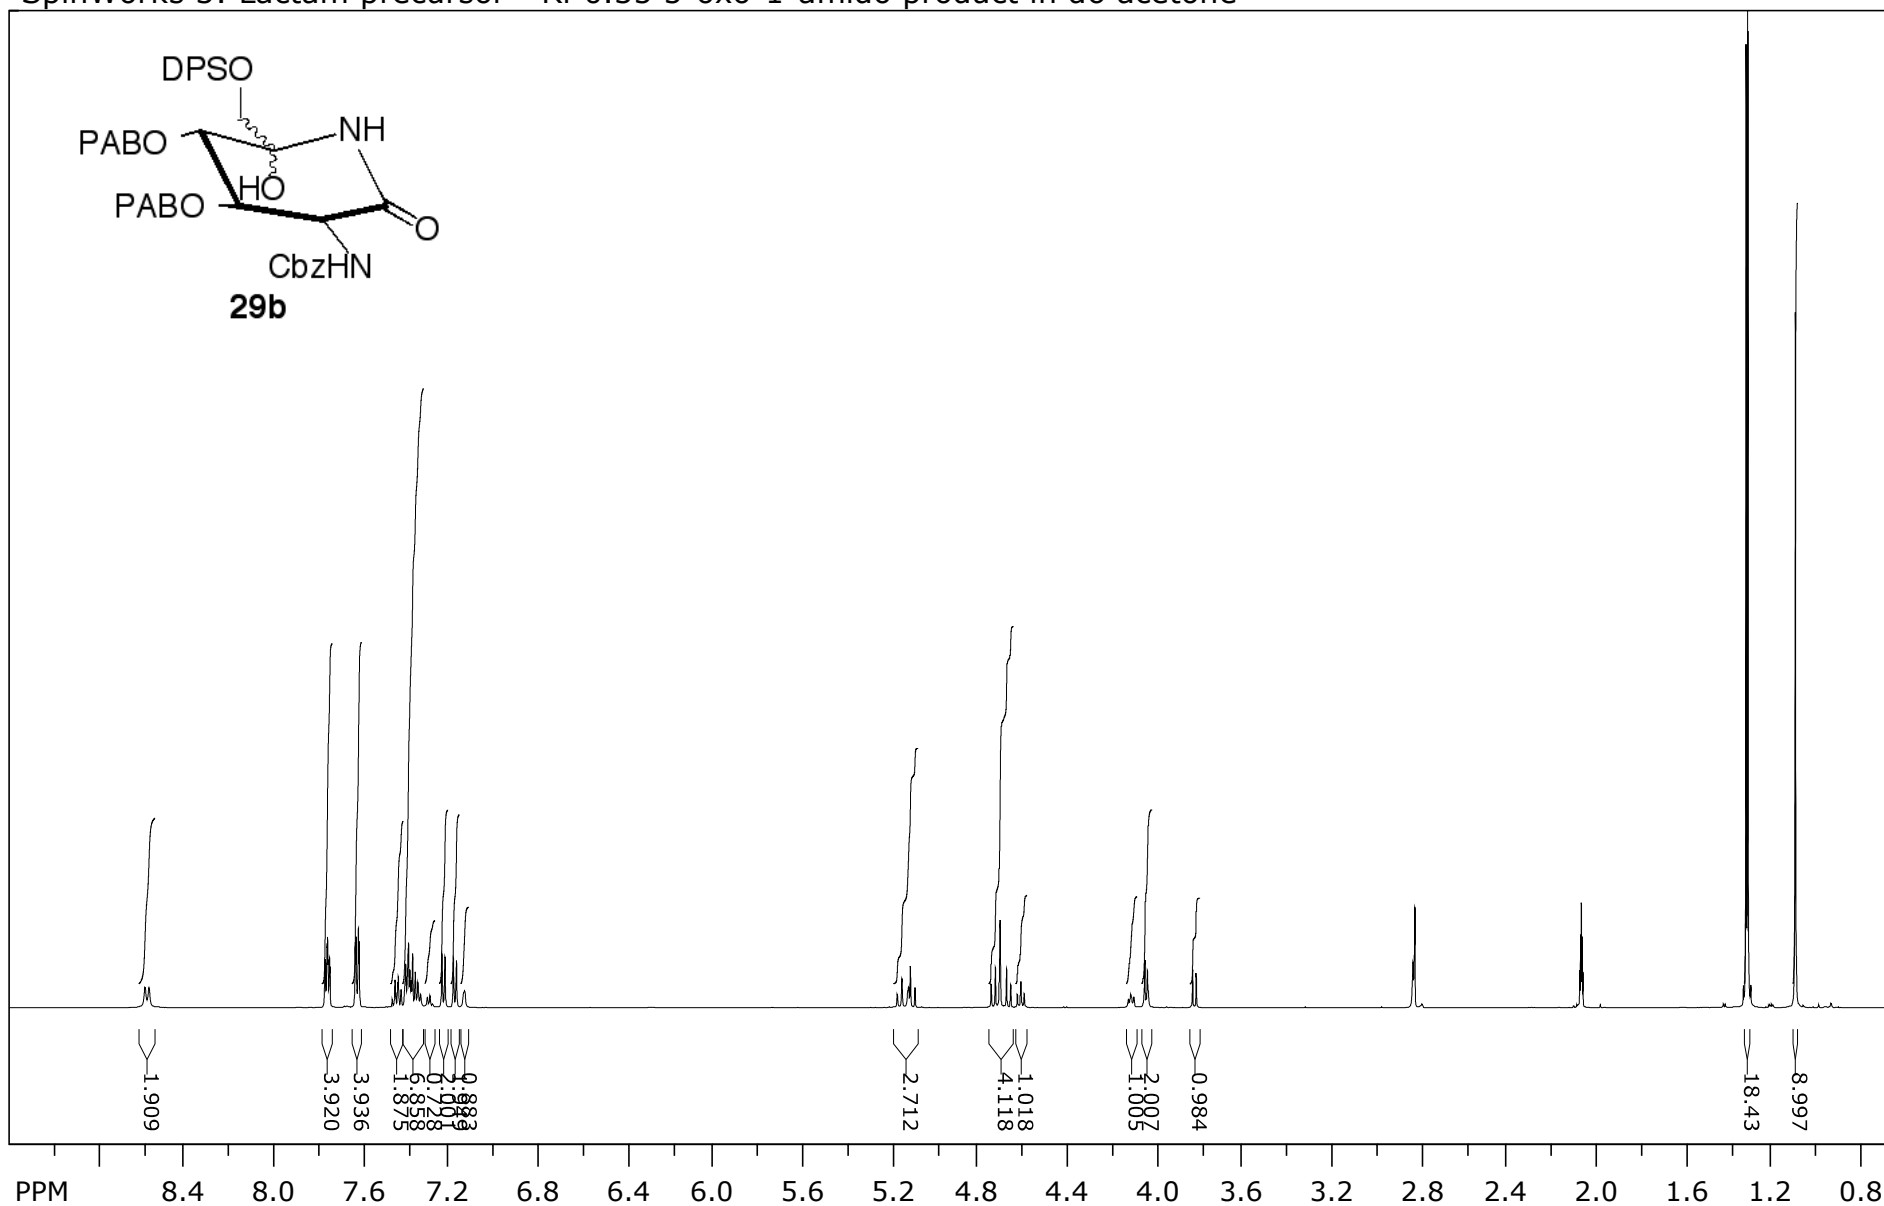

file: ...Data\OxoAmide0\_35d6Acetone1H\1\fid expt: <zgpr>  
transmitter freq.: 600.553538 MHz  
time domain size: 65536 points  
width: 8417.51 Hz = 14.0162 ppm = 0.128441 Hz/pt  
number of scans: 32

freq. of 0 ppm: 600.550010 MHz  
processed size: 262144 complex points  
LB: 0.000 GF: 0.0000  
Hz/cm: 205.875 ppm/cm: 0.34281

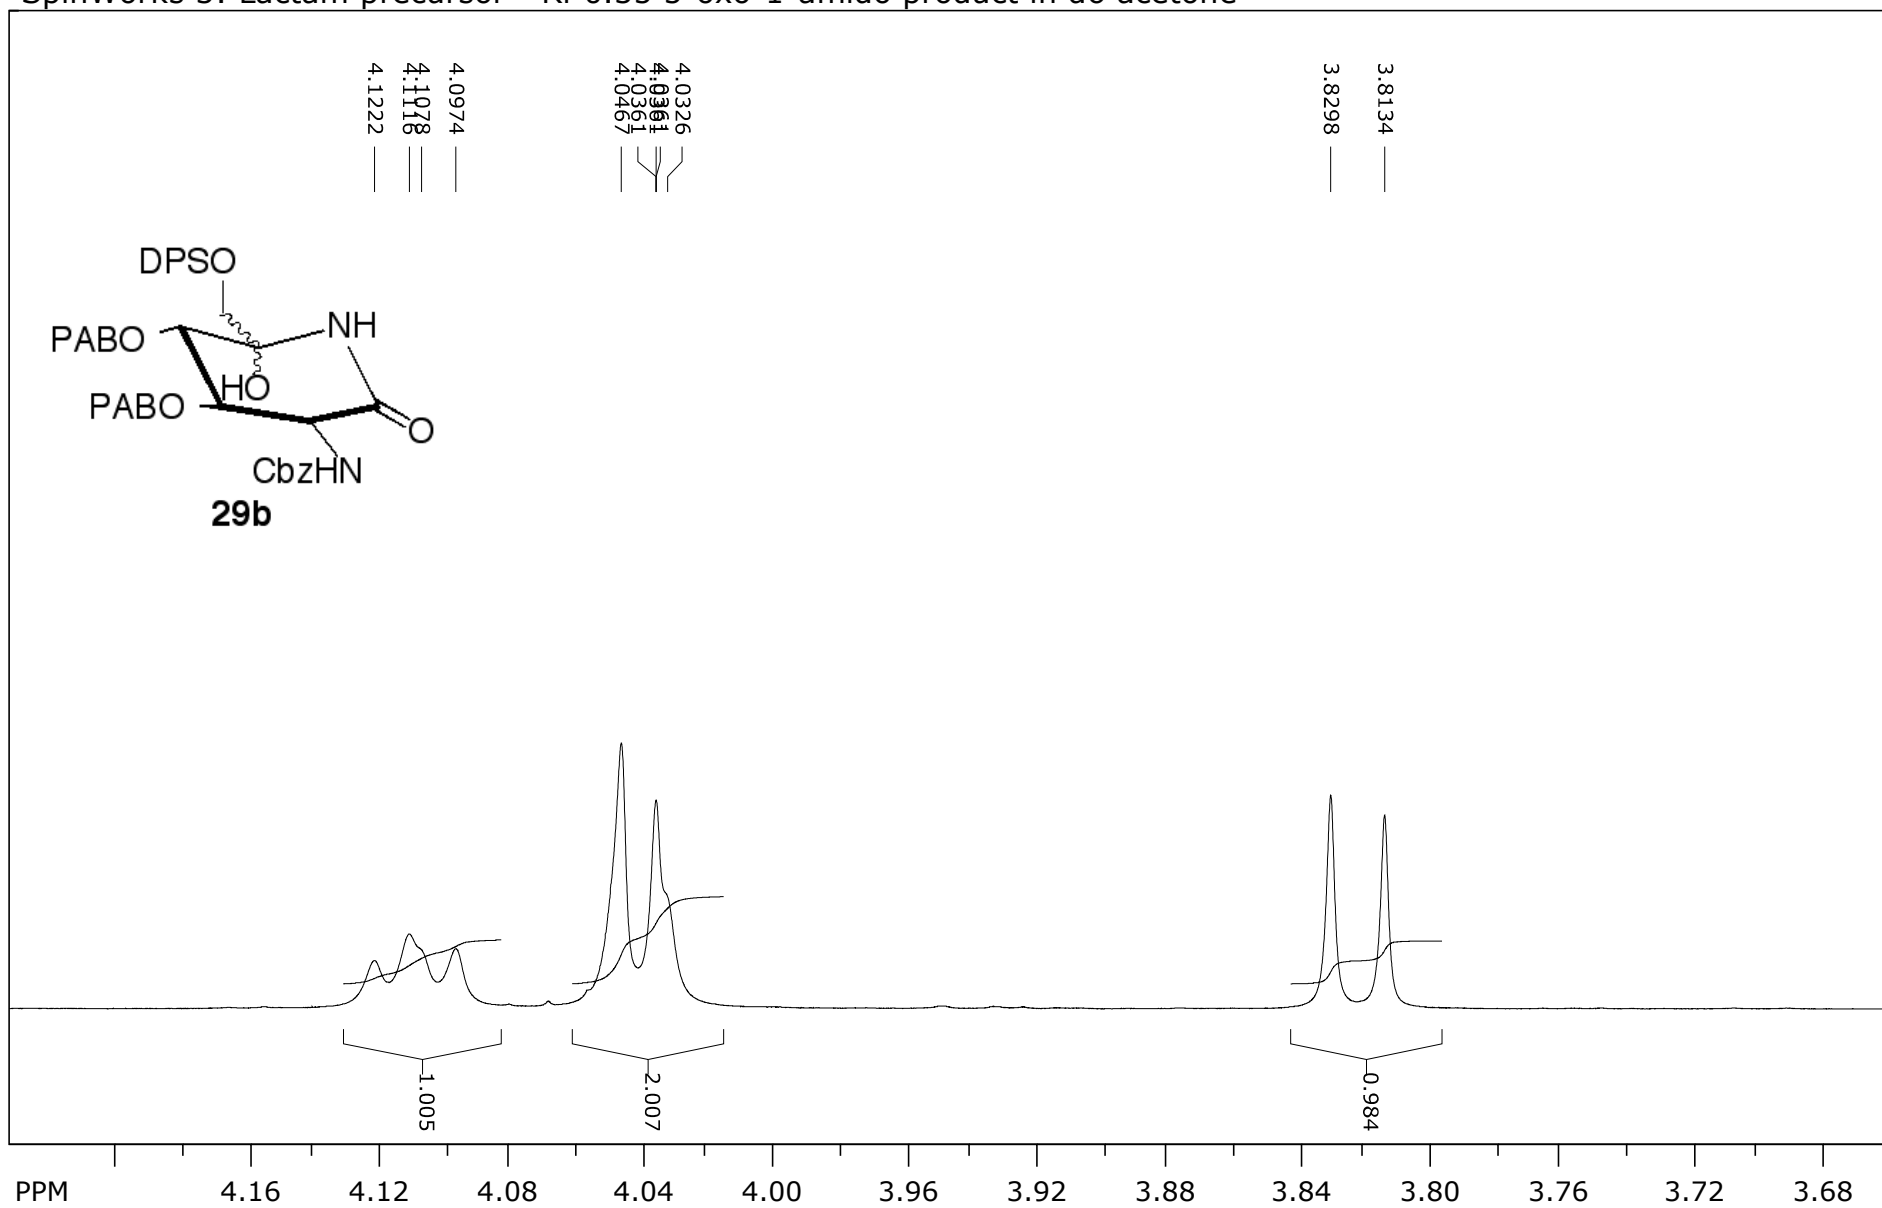

file: ...Data\OxoAmide0\_35d6Acetone1H\1\fid expt: <zgpr>  
transmitter freq.: 600.553538 MHz  
time domain size: 65536 points  
width: 8417.51 Hz = 14.0162 ppm = 0.128441 Hz/pt  
number of scans: 32

freq. of 0 ppm: 600.550010 MHz  
processed size: 262144 complex points  
LB: 0.000 GF: 0.0000  
Hz/cm: 13.823 ppm/cm: 0.02302

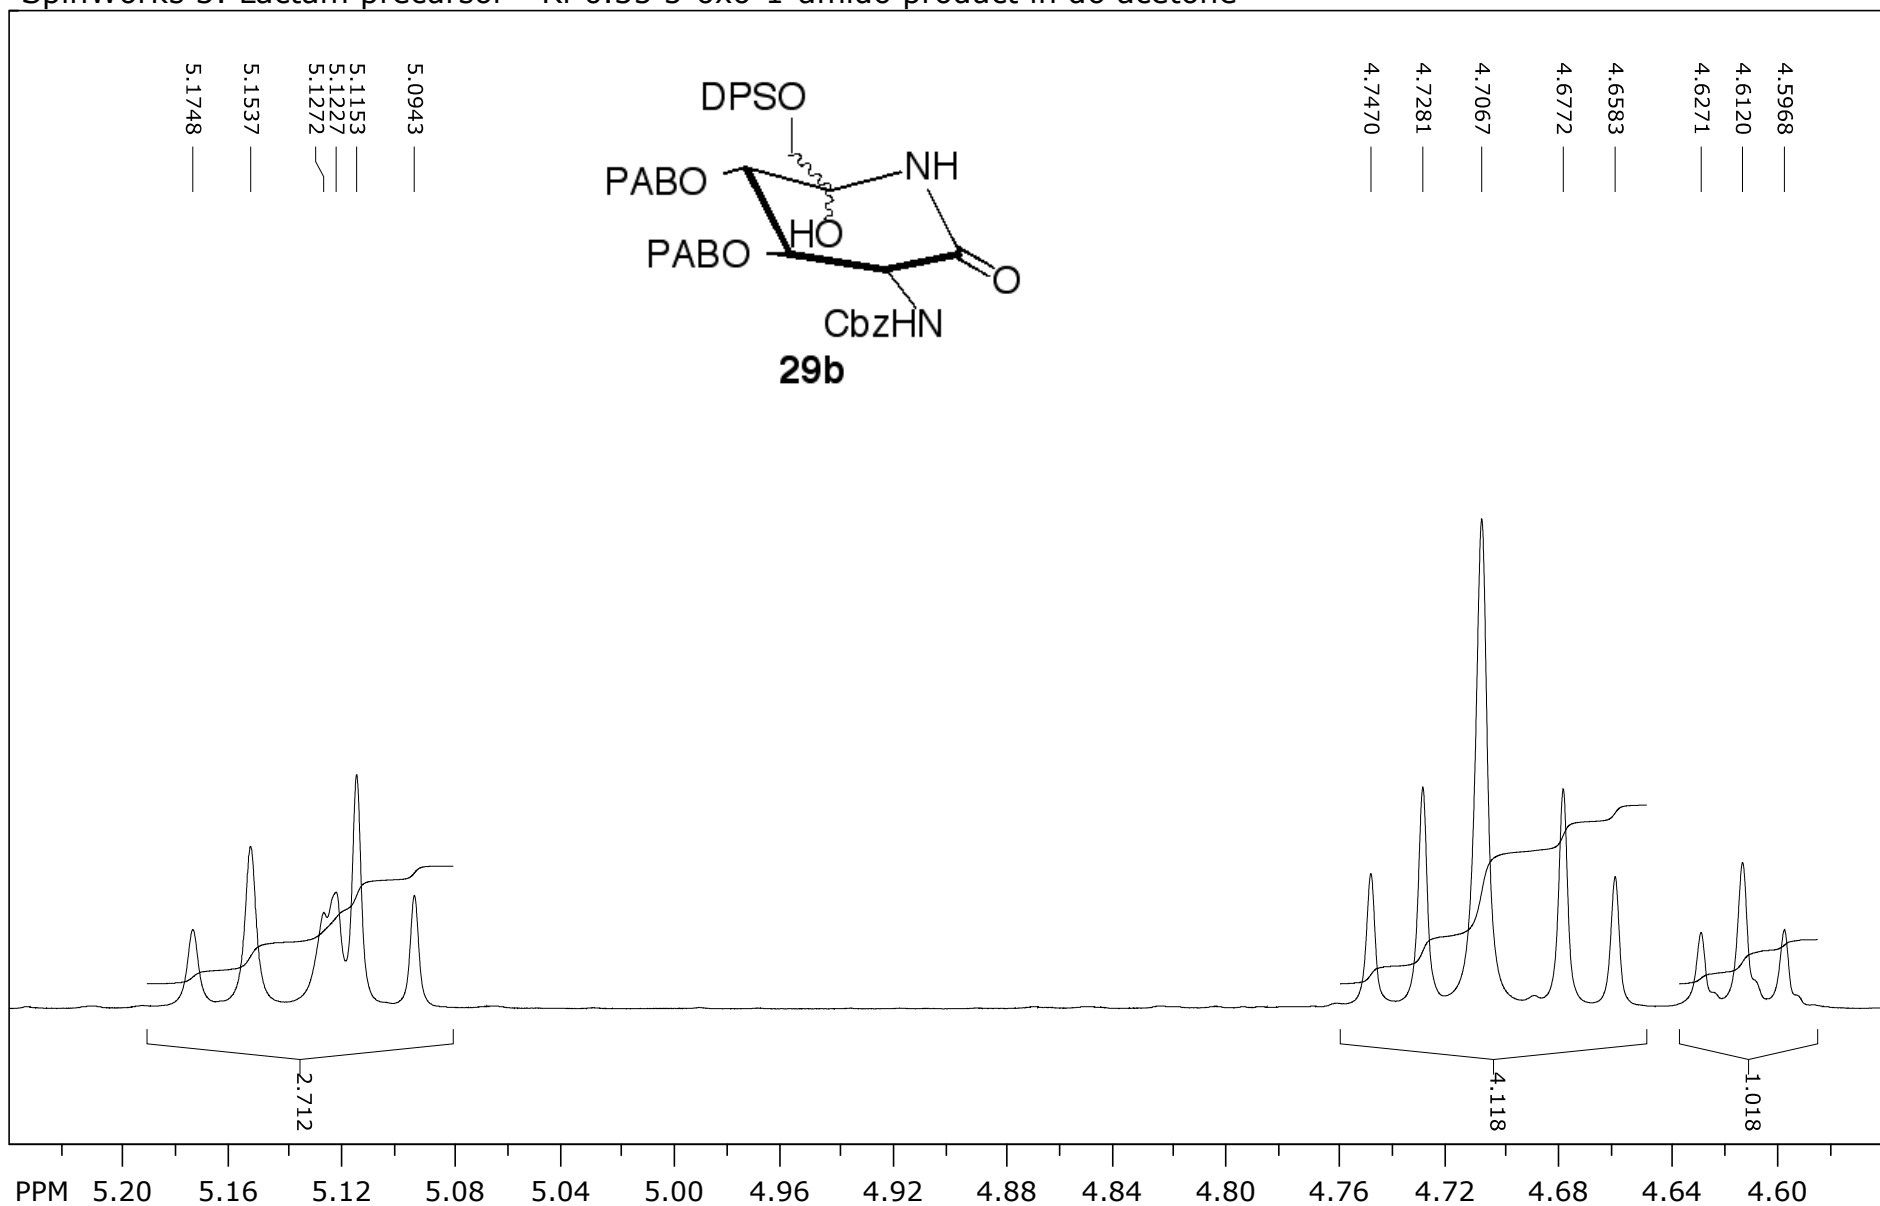

file: ...Data\OxoAmide0\_35d6Acetone1H\1\fid expt: <zgpr>  
transmitter freq.: 600.553538 MHz  
time domain size: 65536 points  
width: 8417.51 Hz = 14.0162 ppm = 0.128441 Hz/pt  
number of scans: 32

freq. of 0 ppm: 600.550010 MHz  
processed size: 262144 complex points  
LB: 0.000 GF: 0.0000  
Hz/cm: 16.417 ppm/cm: 0.02734

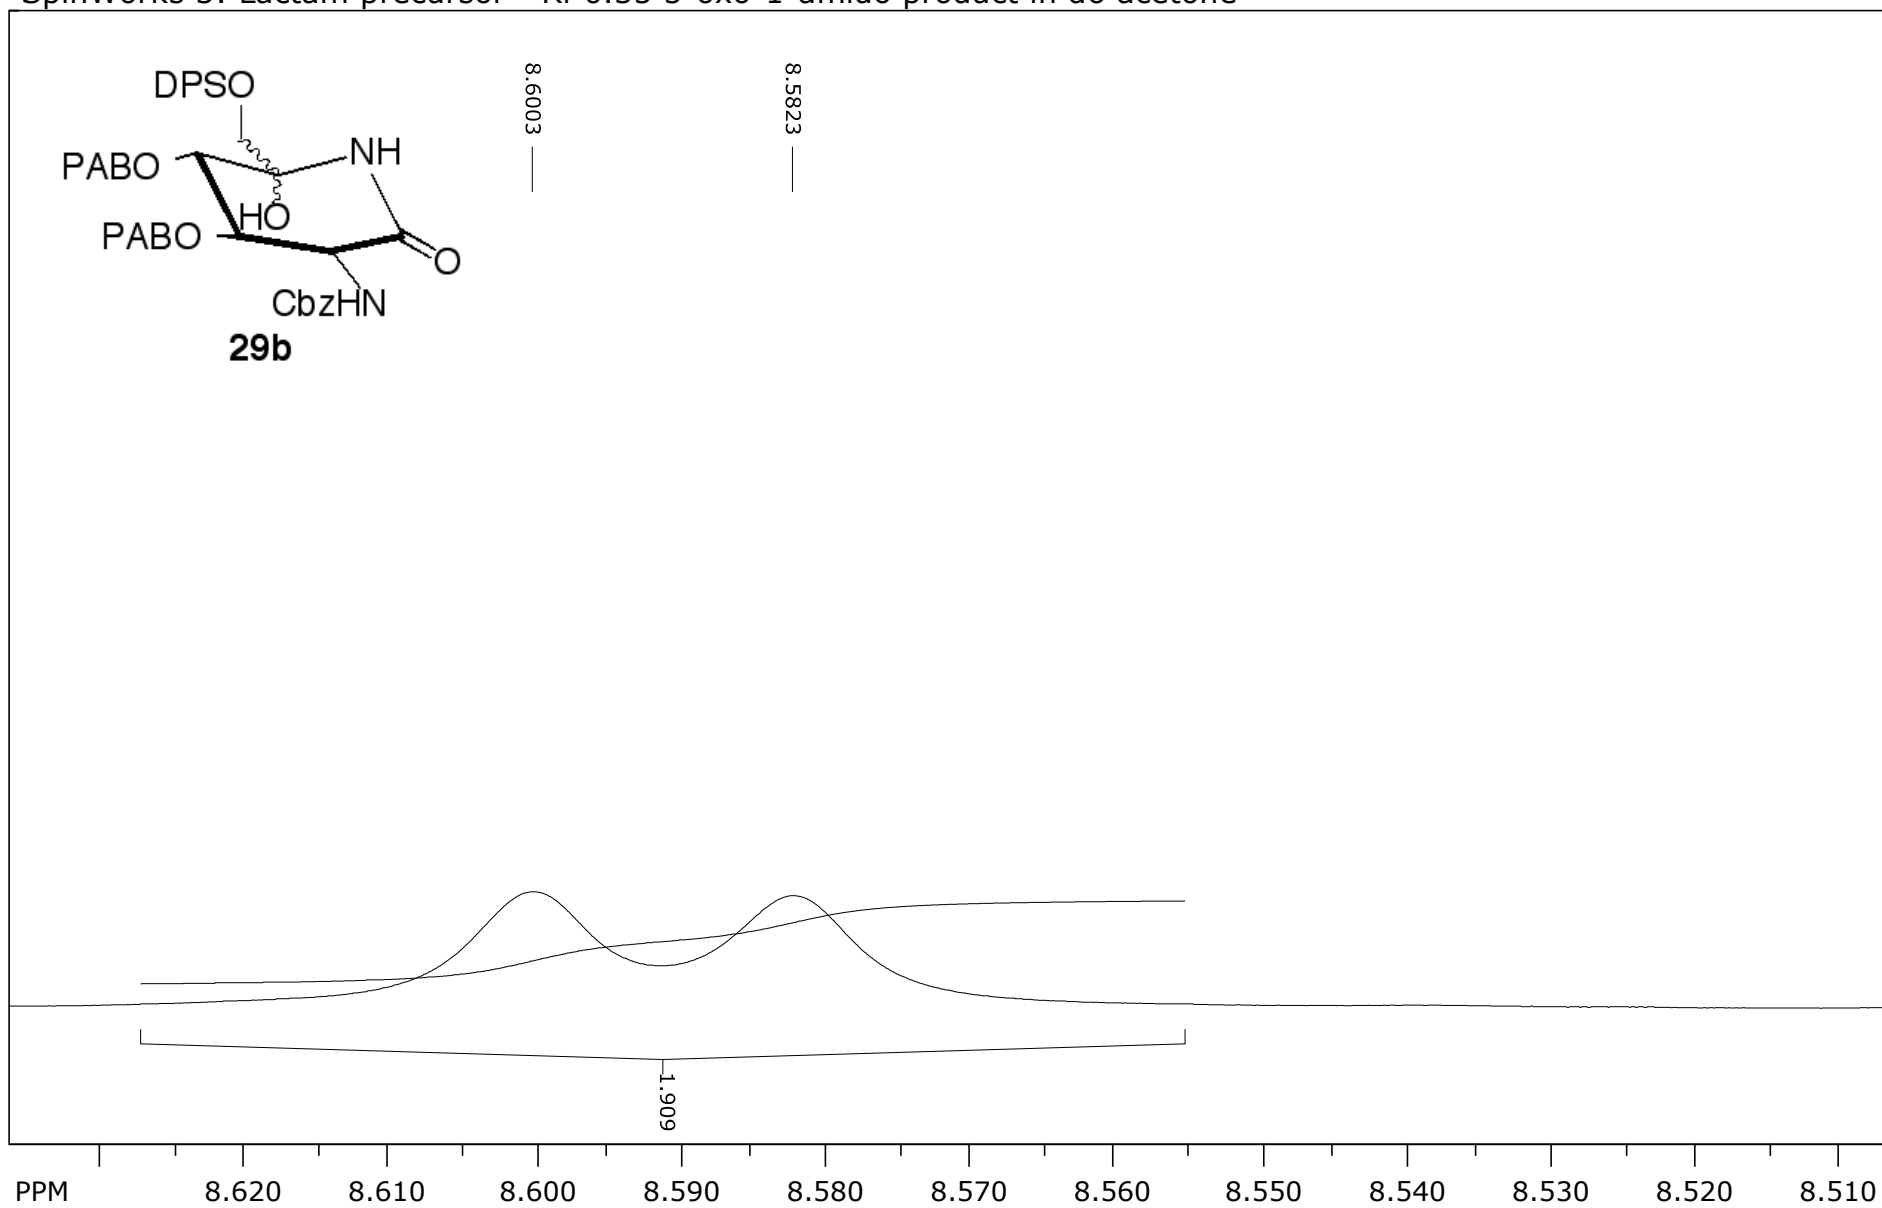

file: ...Data\OxoAmide0\_35d6Acetone1H\1\fid expt: <zgpr>  
transmitter freq.: 600.553538 MHz  
time domain size: 65536 points  
width: 8417.51 Hz = 14.0162 ppm = 0.128441 Hz/pt  
number of scans: 32

freq. of 0 ppm: 600.550010 MHz  
processed size: 262144 complex points  
LB: 0.000 GF: 0.0000  
Hz/cm: 3.126 ppm/cm: 0.00521

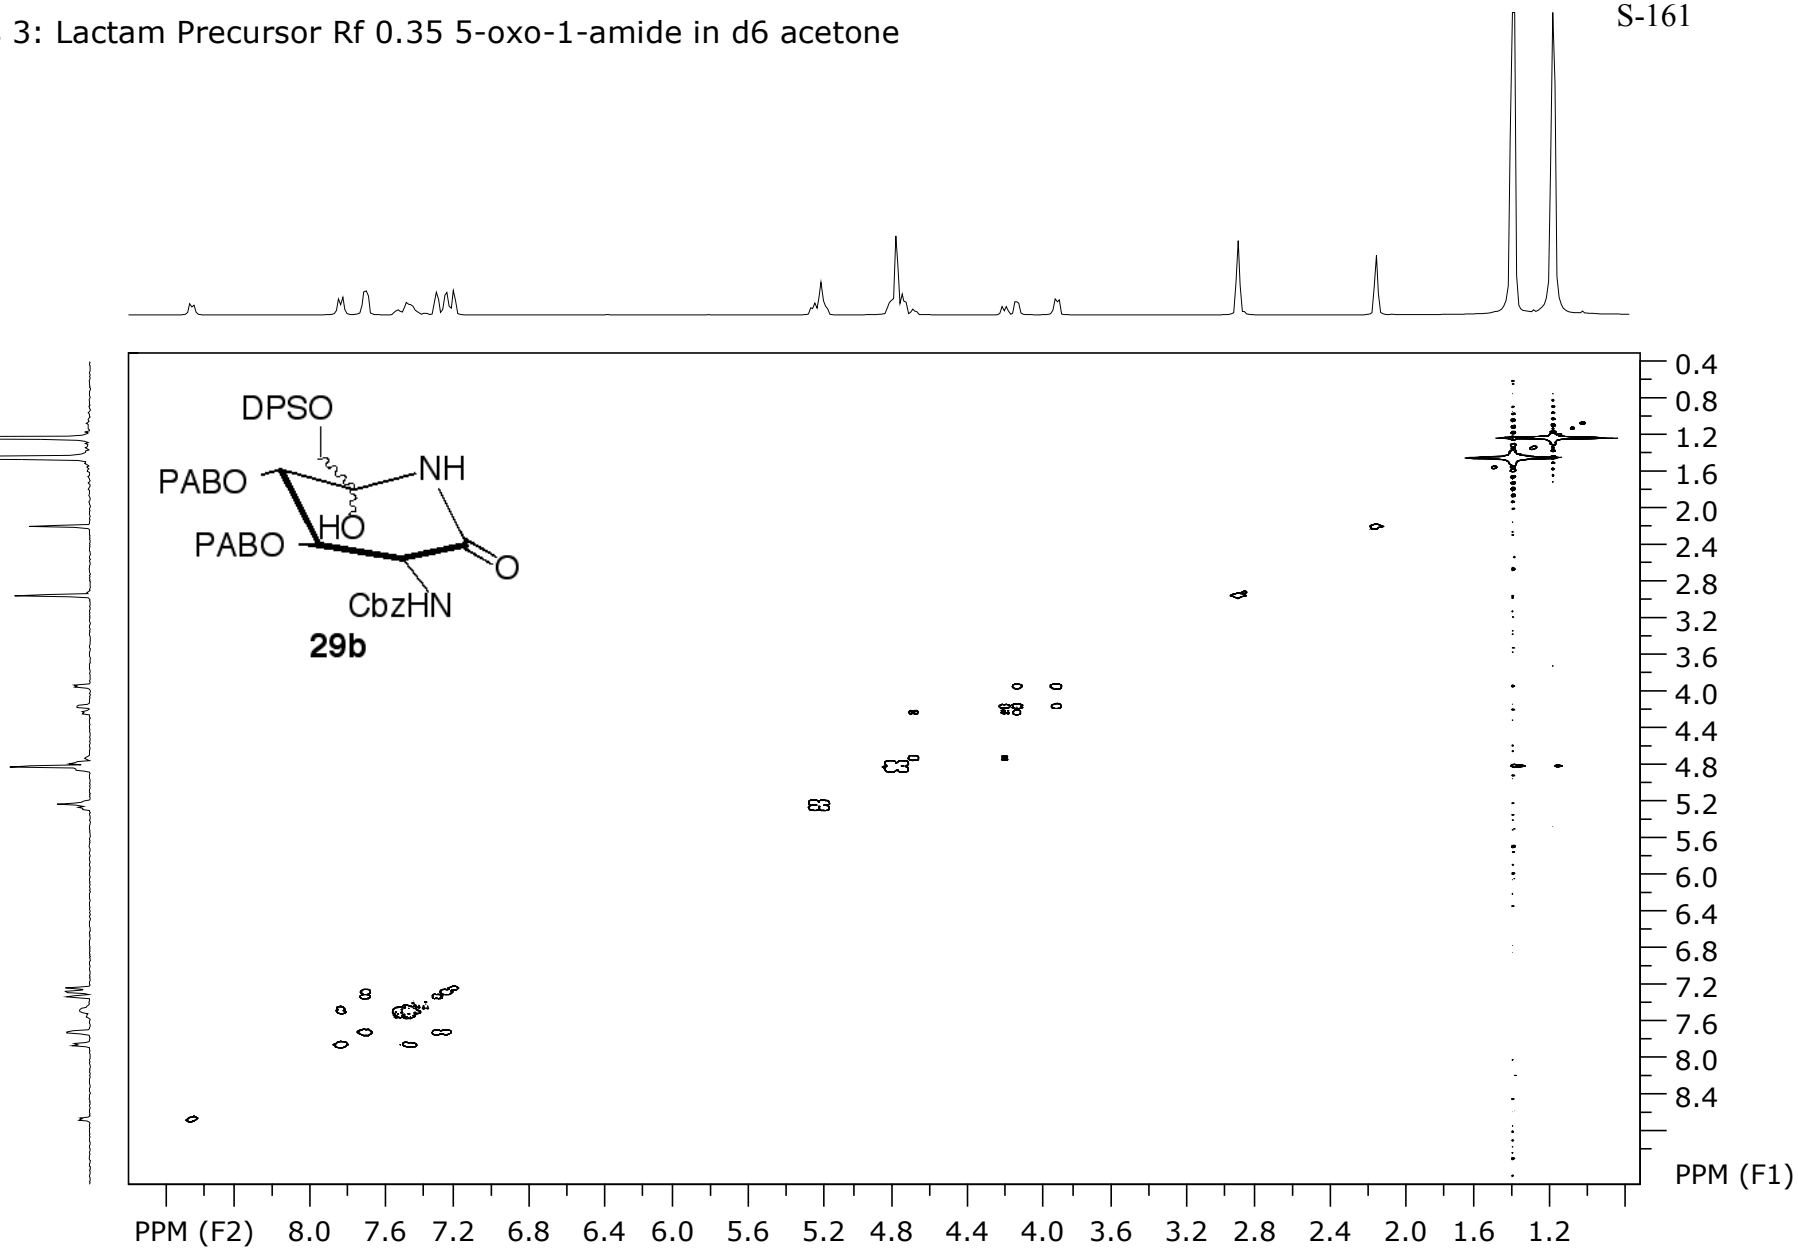

file: ...ta\OxoAmide0\_35d6AcetoneCOSY\1\ser  
 expt: <cosygpqf>  
 transmitter freq: 600.552832 MHz  
 time domain size: 2048 by 1024 points  
 width (F2): 7211.54 Hz = 12.0082 ppm = 3.5213 Hz/pt  
 number of scans: 1

F2: freq. of 0 ppm: 600.5499623 MHz  
 processed size: 1024 complex points  
 window function: Sine  
 shift: 0.0 degrees  
 Hz/cm: 249.078 ppm/cm: 0.41475

F1: freq. of 0 ppm: 600.5499623 MHz  
 processed size: 1024 complex points  
 window function: Sine  
 shift: 0.0 degrees  
 Hz/cm: 495.499 ppm/cm: 0.82507

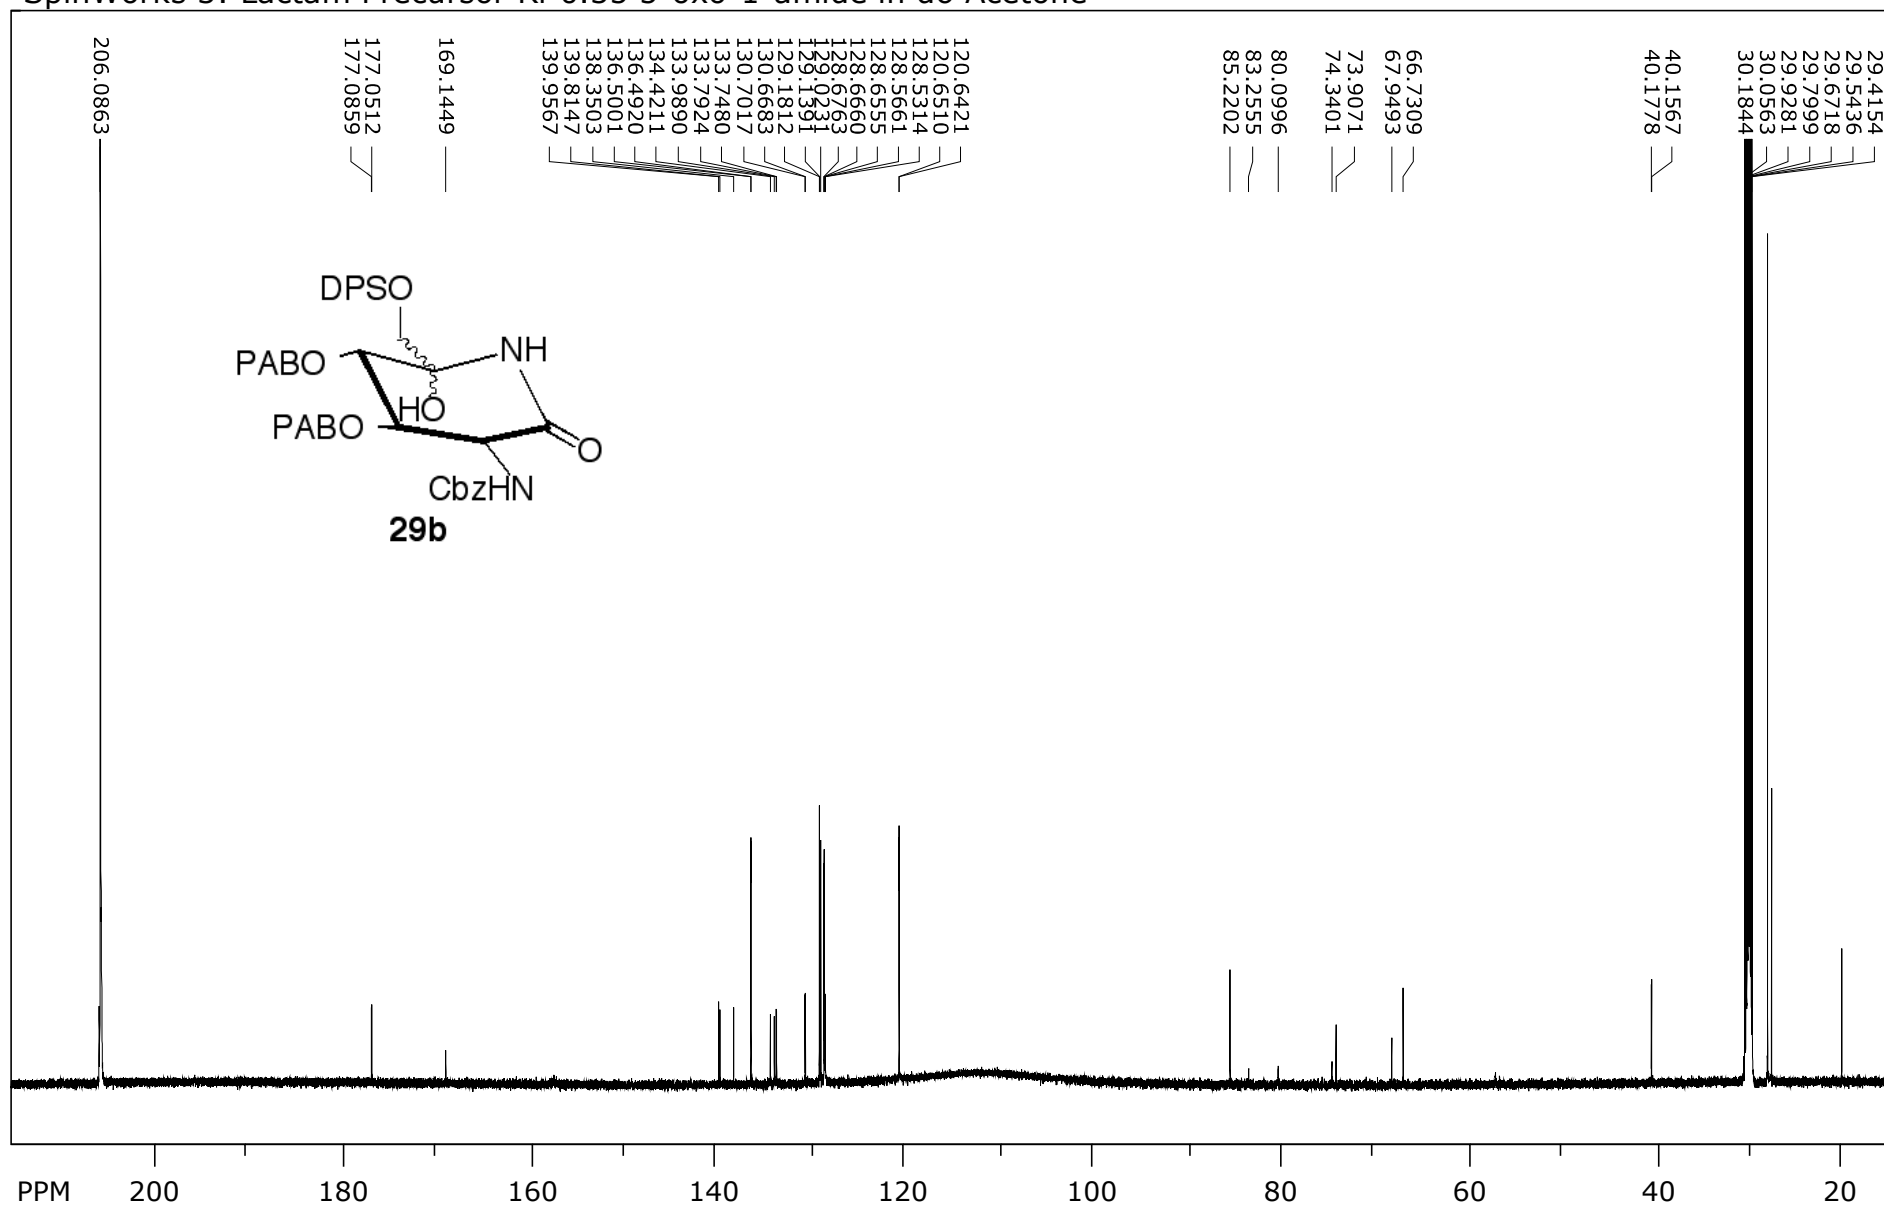

file: ...ata\OxoAmide0\_35d6Acetone13C\1\fid expt: <zpgg30>  
 transmitter freq.: 151.023518 MHz  
 time domain size: 65536 points  
 width: 36057.69 Hz = 238.7555 ppm = 0.550197 Hz/pt  
 number of scans: 12288

freq. of 0 ppm: 151.008288 MHz  
 processed size: 131072 complex points  
 LB: 0.300 GF: 0.0000  
 Hz/cm: 1216.079 ppm/cm: 8.05225



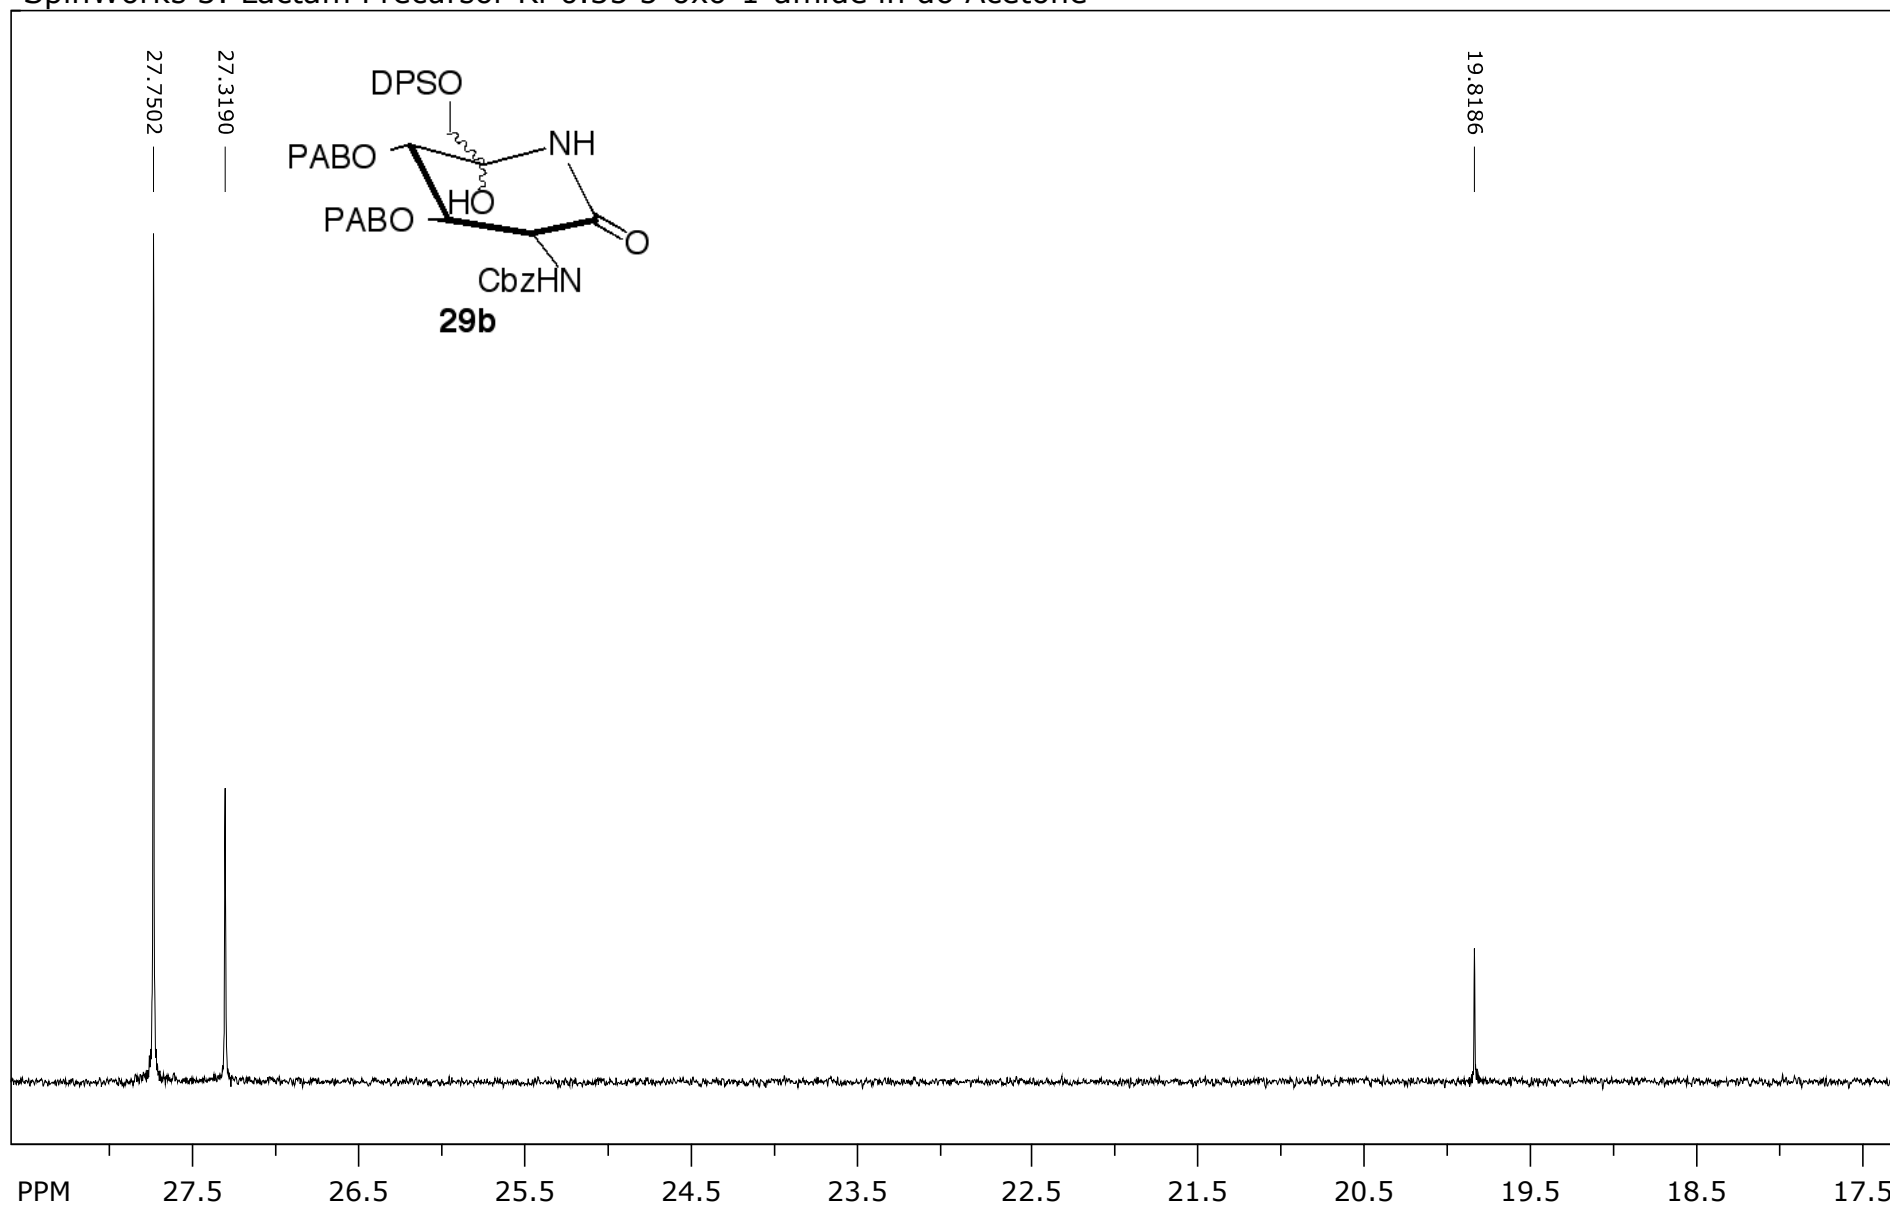

file: ...ata\OxoAmide0\_35d6Acetone13C\1\fid expt: <zpgg30>  
transmitter freq.: 151.023518 MHz  
time domain size: 65536 points  
width: 36057.69 Hz = 238.7555 ppm = 0.550197 Hz/pt  
number of scans: 12288

freq. of 0 ppm: 151.008288 MHz  
processed size: 131072 complex points  
LB: 0.300 GF: 0.0000  
Hz/cm: 68.266 ppm/cm: 0.45202

|               |                      |             |                      |                 |              |                        |                       |
|---------------|----------------------|-------------|----------------------|-----------------|--------------|------------------------|-----------------------|
| Sample Name   | Jeff-38              | Position    | Vial 24              | Instrument Name | Instrument 1 | User Name              | DYL                   |
| Inj Vol       | 2                    | InjPosition |                      | SampleType      | Unknown      | IRM Calibration Status | Some Ions Missed      |
| Data Filename | C18_Elution2_S38_Jef | ACQ Method  | C18 waters symmetry2 | Comment         |              | Acquired Time          | 9/15/2012 10:32:37 AM |

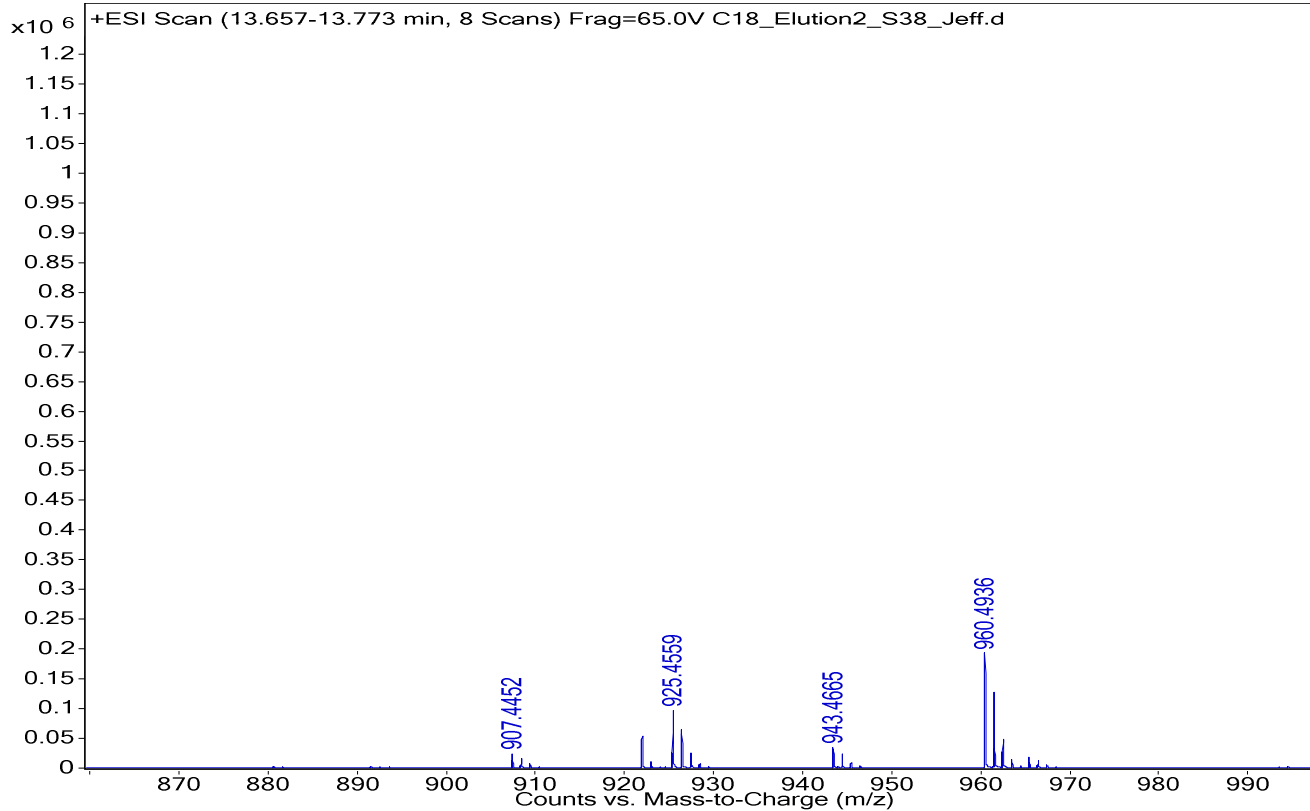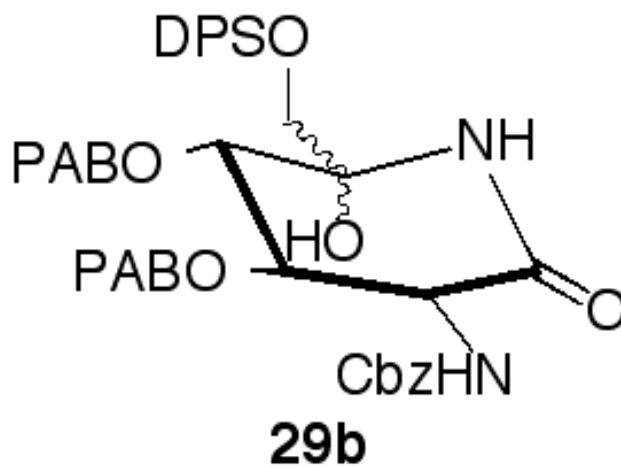

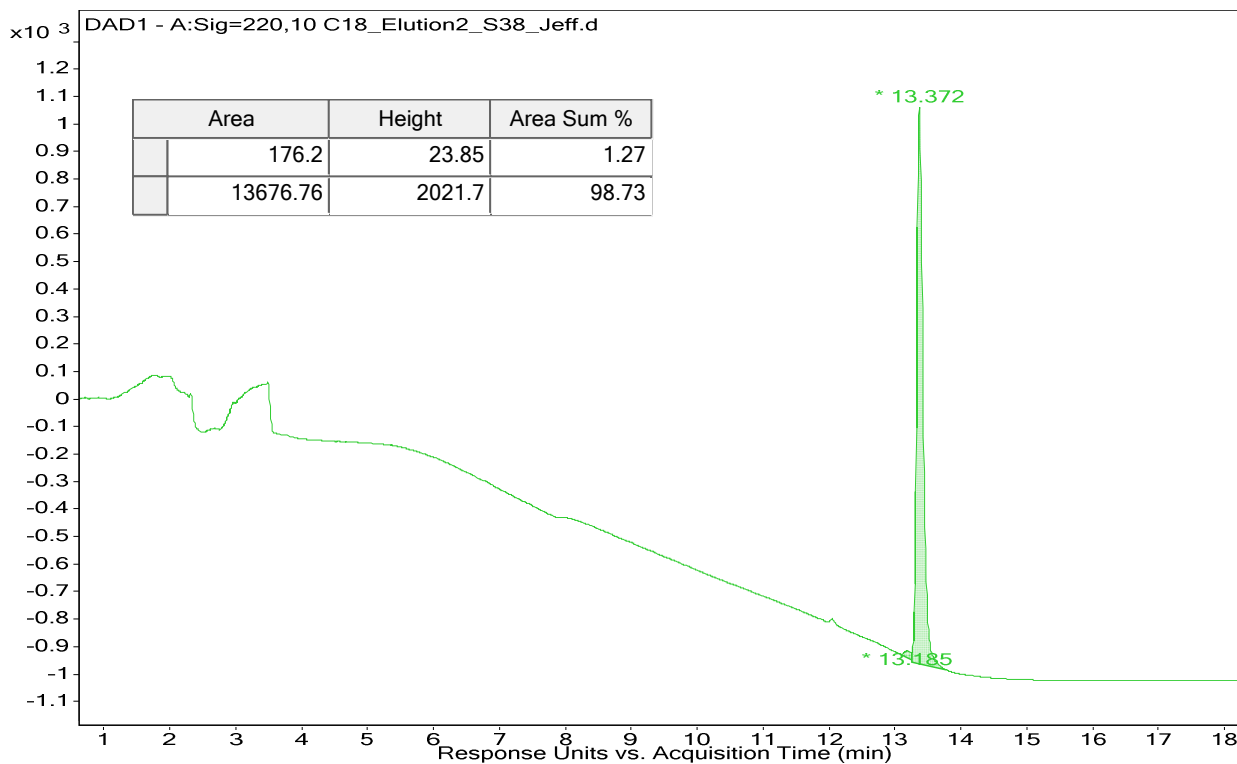

|               |                      |             |                      |                 |              |                        |                       |
|---------------|----------------------|-------------|----------------------|-----------------|--------------|------------------------|-----------------------|
| Sample Name   | Jeff-38              | Position    | Vial 24              | Instrument Name | Instrument 1 | User Name              | DYL                   |
| Inj Vol       | 2                    | InjPosition |                      | SampleType      | Unknown      | IRM Calibration Status | Some Ions Missed      |
| Data Filename | C18_Elution2_S38_Jef | ACQ Method  | C18 waters symmetry2 | Comment         |              | Acquired Time          | 9/15/2012 10:32:37 AM |

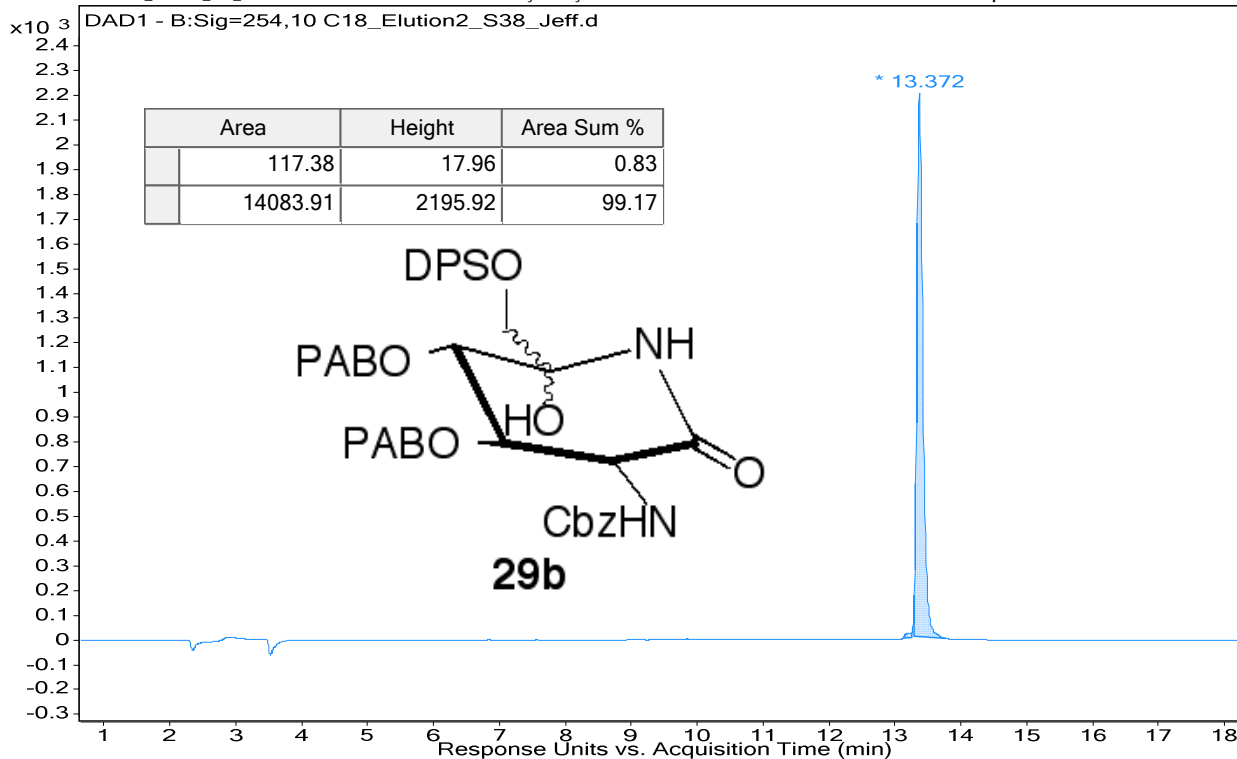

Analysis on a Waters SymmetryShield™ C18 (4.6 mm X 15 cm (i.d. x l.), 3.5 μm) at 0.5 mL/min. Solvent A: 50 mM NH<sub>4</sub>OAc (aq); B: CH<sub>3</sub>CN

| Time (min) | % B |
|------------|-----|
| 0          | 20  |
| 1          | 20  |
| 10         | 100 |
| 20         | 100 |

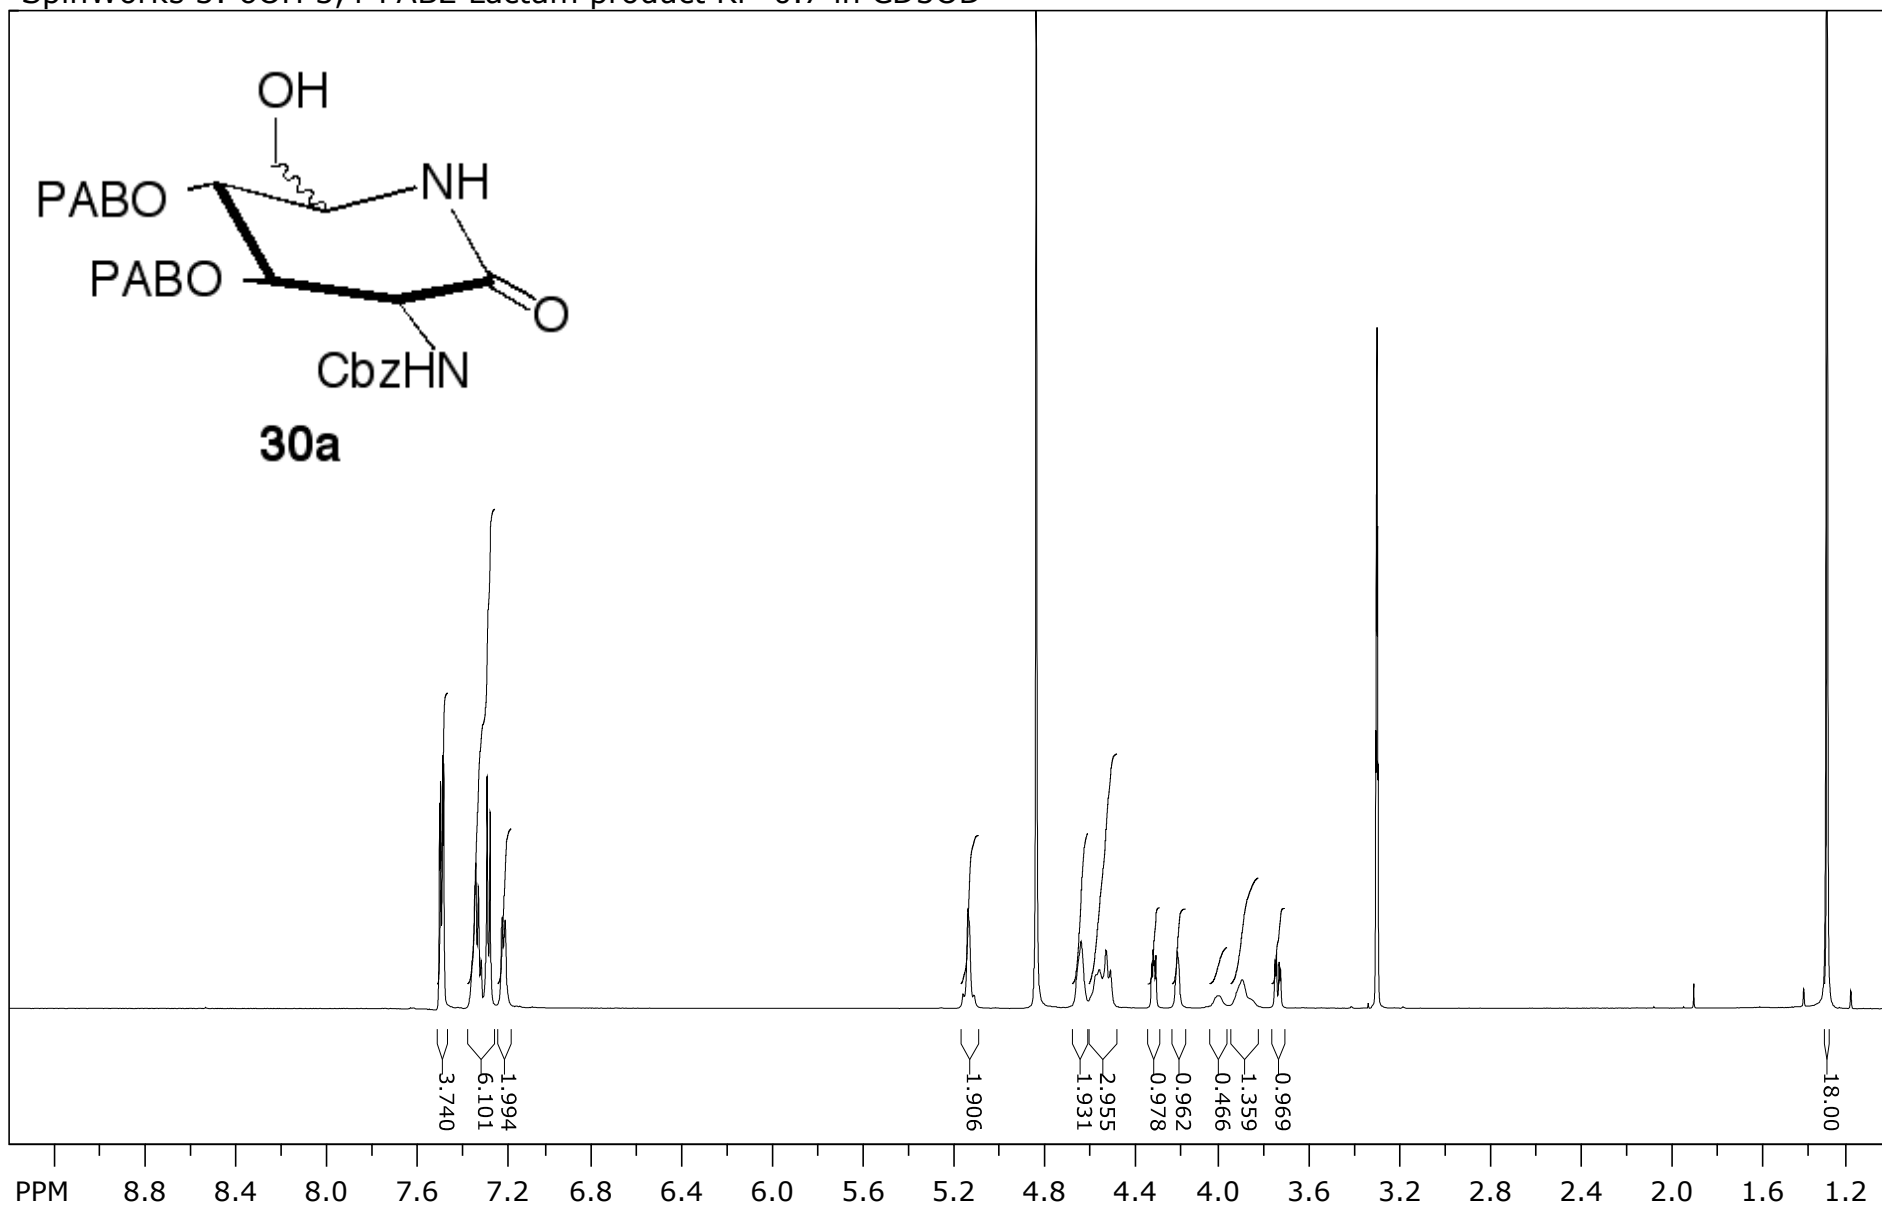

file: ...NMR Data\6OHLactam0\_7CD3OD1H\1\fid exp: <zgpr>  
transmitter freq.: 600.553538 MHz  
time domain size: 65536 points  
width: 8417.51 Hz = 14.0162 ppm = 0.128441 Hz/pt  
number of scans: 32

freq. of 0 ppm: 600.550023 MHz  
processed size: 262144 complex points  
LB: 0.000 GF: 0.0000  
Hz/cm: 202.539 ppm/cm: 0.33725

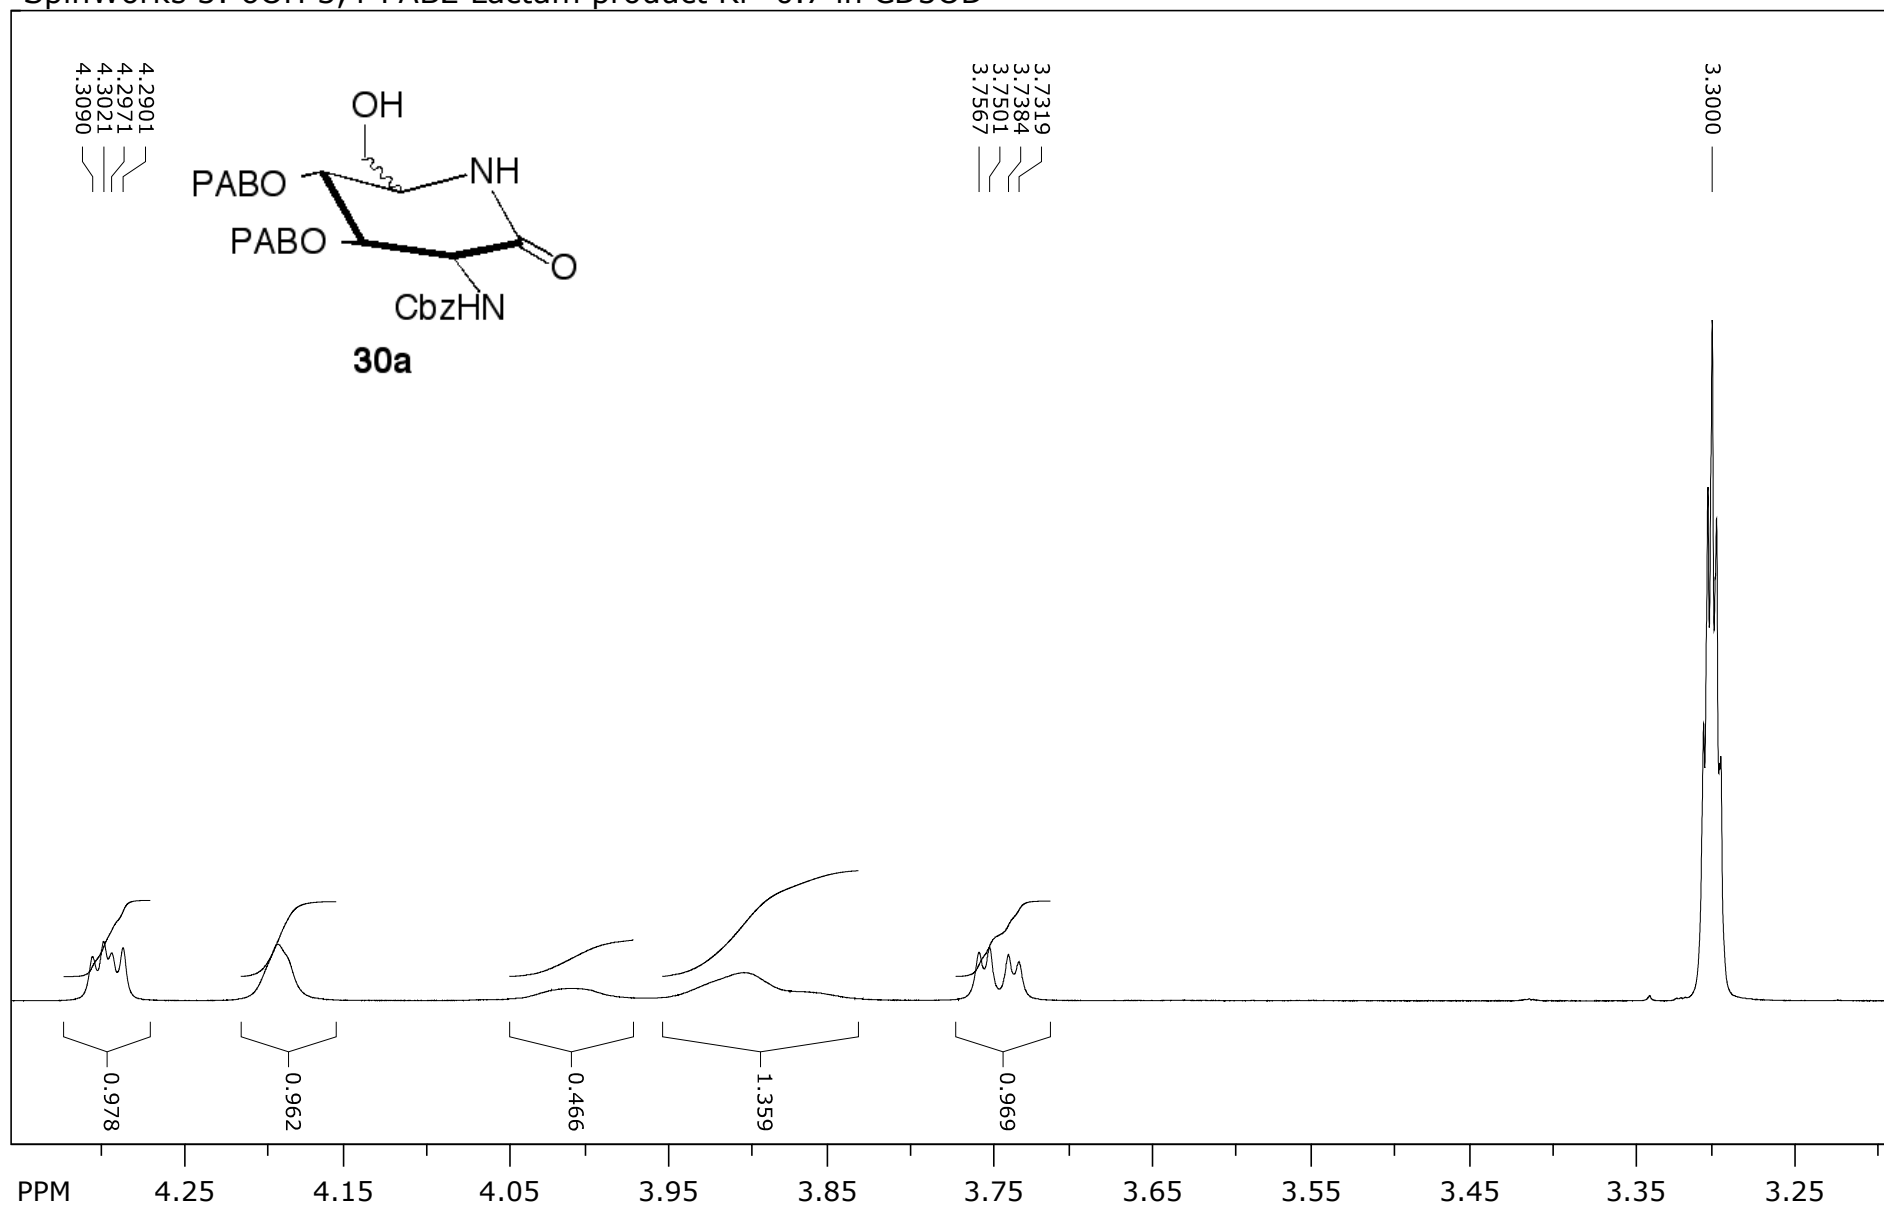

file: ...NMR Data\6OHLactam0\_7CD3OD1H\1\fid expt: <zgpr>  
transmitter freq.: 600.553538 MHz  
time domain size: 65536 points  
width: 8417.51 Hz = 14.0162 ppm = 0.128441 Hz/pt  
number of scans: 32

freq. of 0 ppm: 600.550023 MHz  
processed size: 262144 complex points  
LB: 0.000 GF: 0.0000  
Hz/cm: 28.166 ppm/cm: 0.04690

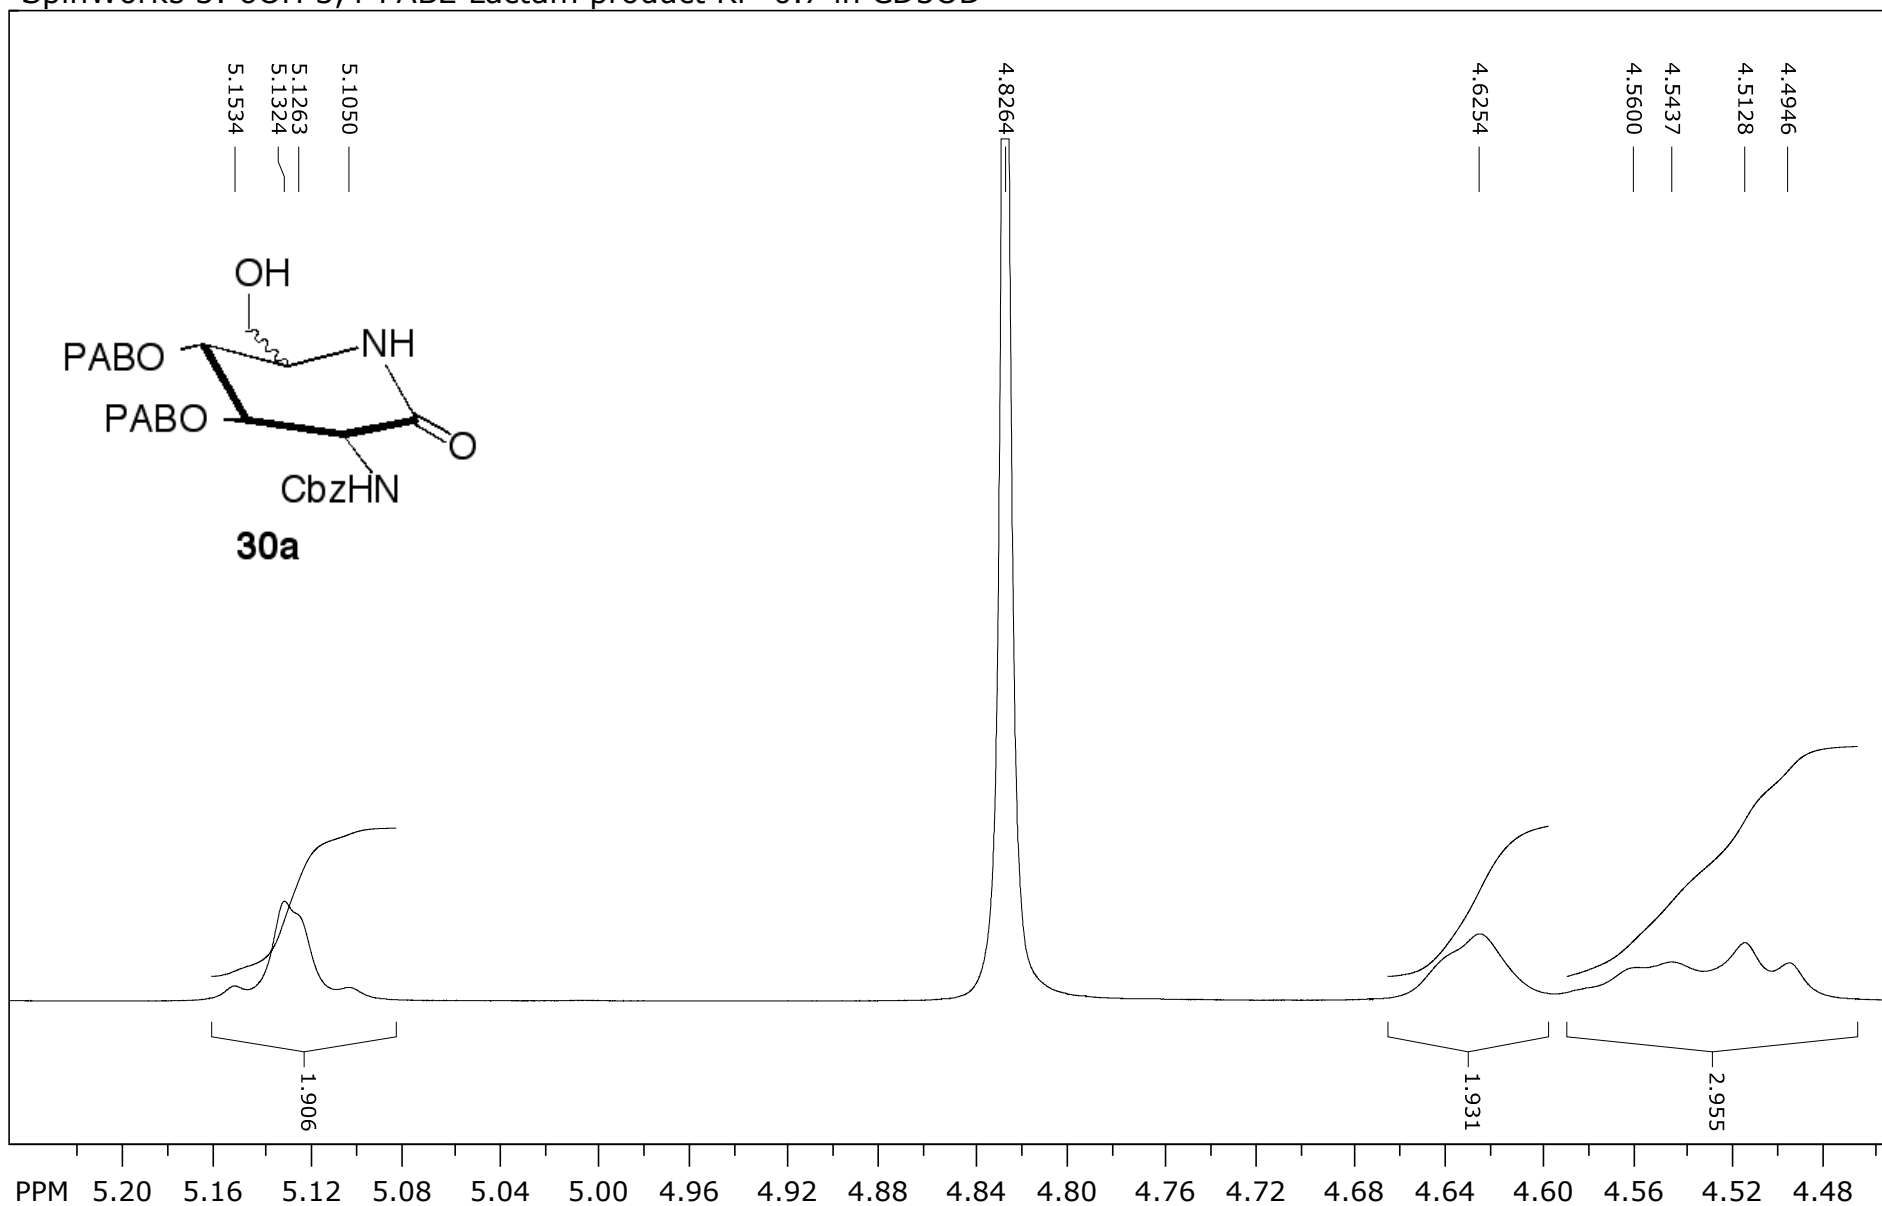

file: ...NMR Data\6OHLactam0\_7CD3OD1H\1\fid expt: <zgpr>  
transmitter freq.: 600.553538 MHz  
time domain size: 65536 points  
width: 8417.51 Hz = 14.0162 ppm = 0.128441 Hz/pt  
number of scans: 32

freq. of 0 ppm: 600.550023 MHz  
processed size: 262144 complex points  
LB: 0.000 GF: 0.0000  
Hz/cm: 19.183 ppm/cm: 0.03194

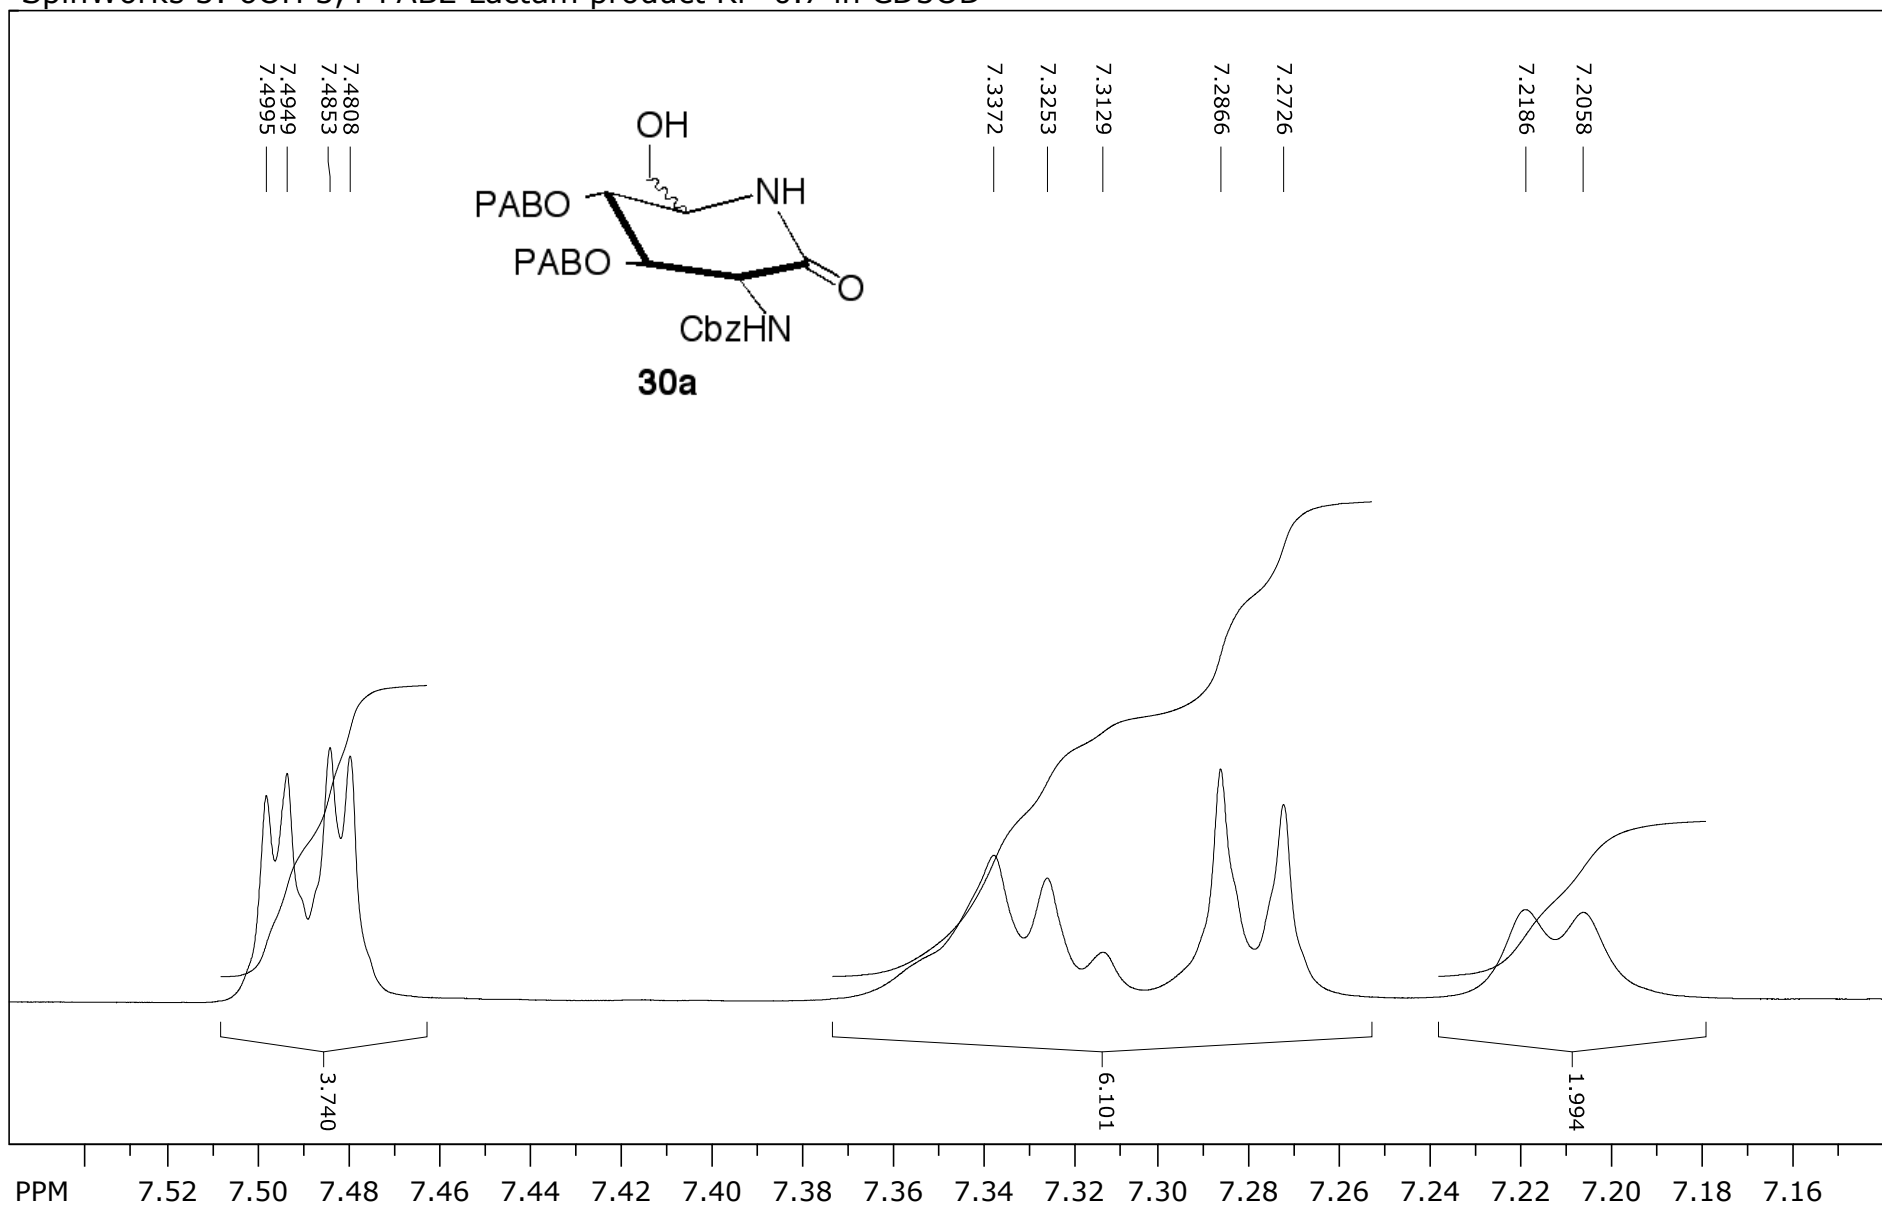

file: ...NMR Data\6OHLactam0\_7CD3OD1H\1\fid expt: <zgpr>  
transmitter freq.: 600.553538 MHz  
time domain size: 65536 points  
width: 8417.51 Hz = 14.0162 ppm = 0.128441 Hz/pt  
number of scans: 32

freq. of 0 ppm: 600.550023 MHz  
processed size: 262144 complex points  
LB: 0.000 GF: 0.0000  
Hz/cm: 10.084 ppm/cm: 0.01679

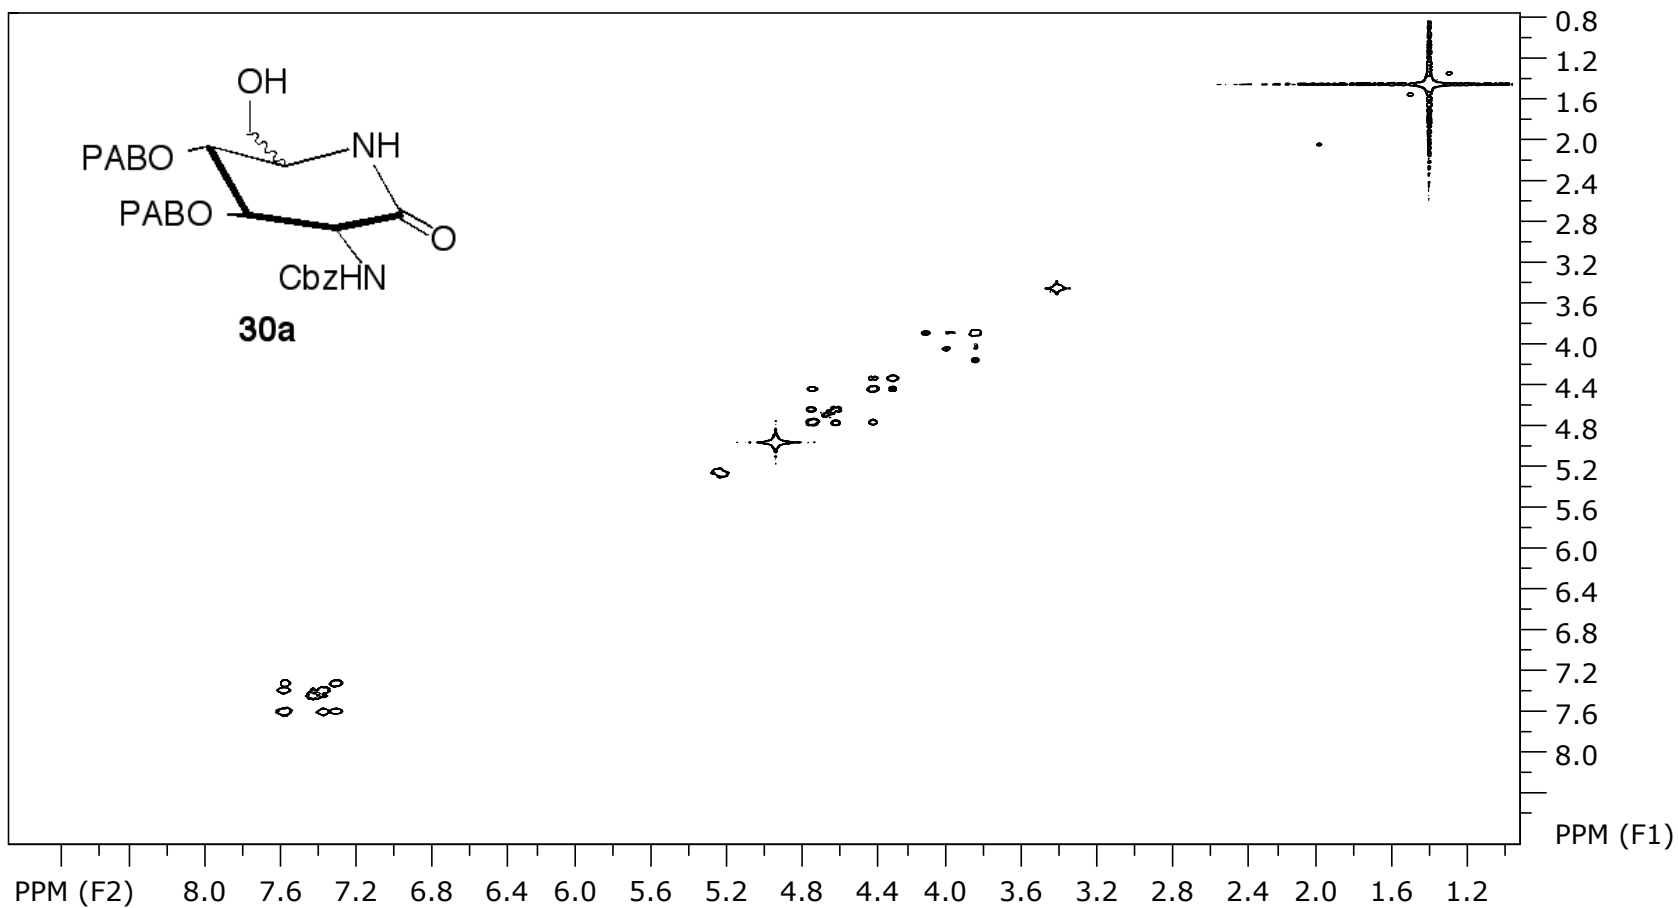

file: ...R Data\6OHLactam0\_7CD3ODCOSY\1\ser  
 expt: <cosygpqf>  
 transmitter freq: 600.552832 MHz  
 time domain size: 2048 by 1024 points  
 width (F2): 7211.54 Hz = 12.0082 ppm = 3.5213 Hz/pt  
 number of scans: 1

F2: freq. of 0 ppm: 600.5499623 MHz  
 processed size: 1024 complex points  
 window function: Sine  
 shift: 0.0 degrees  
 Hz/cm: 245.010 ppm/cm: 0.40797

F1: freq. of 0 ppm: 600.5499623 MHz  
 processed size: 1024 complex points  
 window function: Sine  
 shift: 0.0 degrees  
 Hz/cm: 444.878 ppm/cm: 0.74078



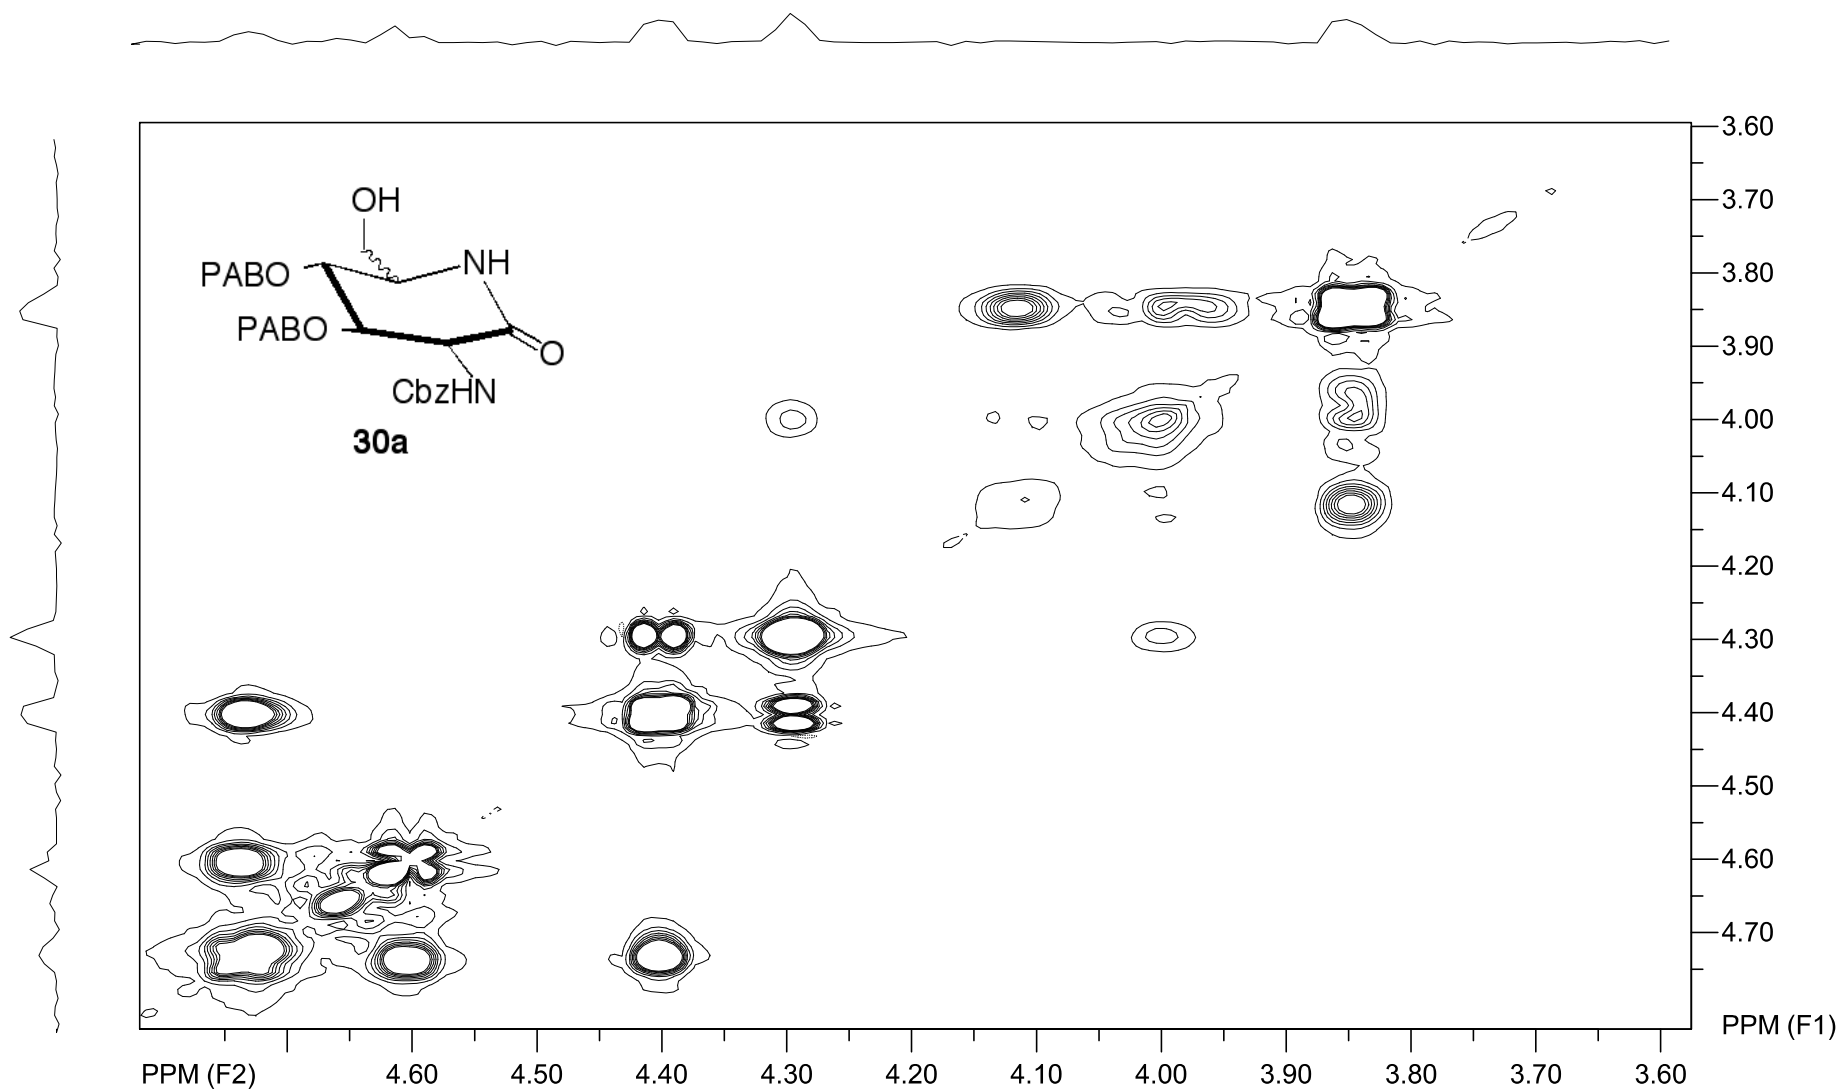

file: C:\Users\Jeff\Documents\NMR Folder\NMR Data\6OHLactam0\_7CD3ODCOSY\1\ser  
transmitter freq.: 600.552832 MHz  
time domain size: 2048 by 1024 points  
width (F2): 7211.50 Hz = 12.008167 ppm = 3.521242 Hz/pt  
number of scans: 1

expt: <cosF2>:freq. of 0 ppm: 600.549962 MHz  
processed size: 1024 complex points  
window function: Sine  
shift: 0.0 degrees  
Hz/cm: 36.405 ppm/cm: 0.06062

F1: freq. of 0 ppm: 600.549962 MHz  
processed size: 1024 complex points  
window function: Sine  
shift: 0.0 degrees  
Hz/cm: 61.916 ppm/cm: 0.10310

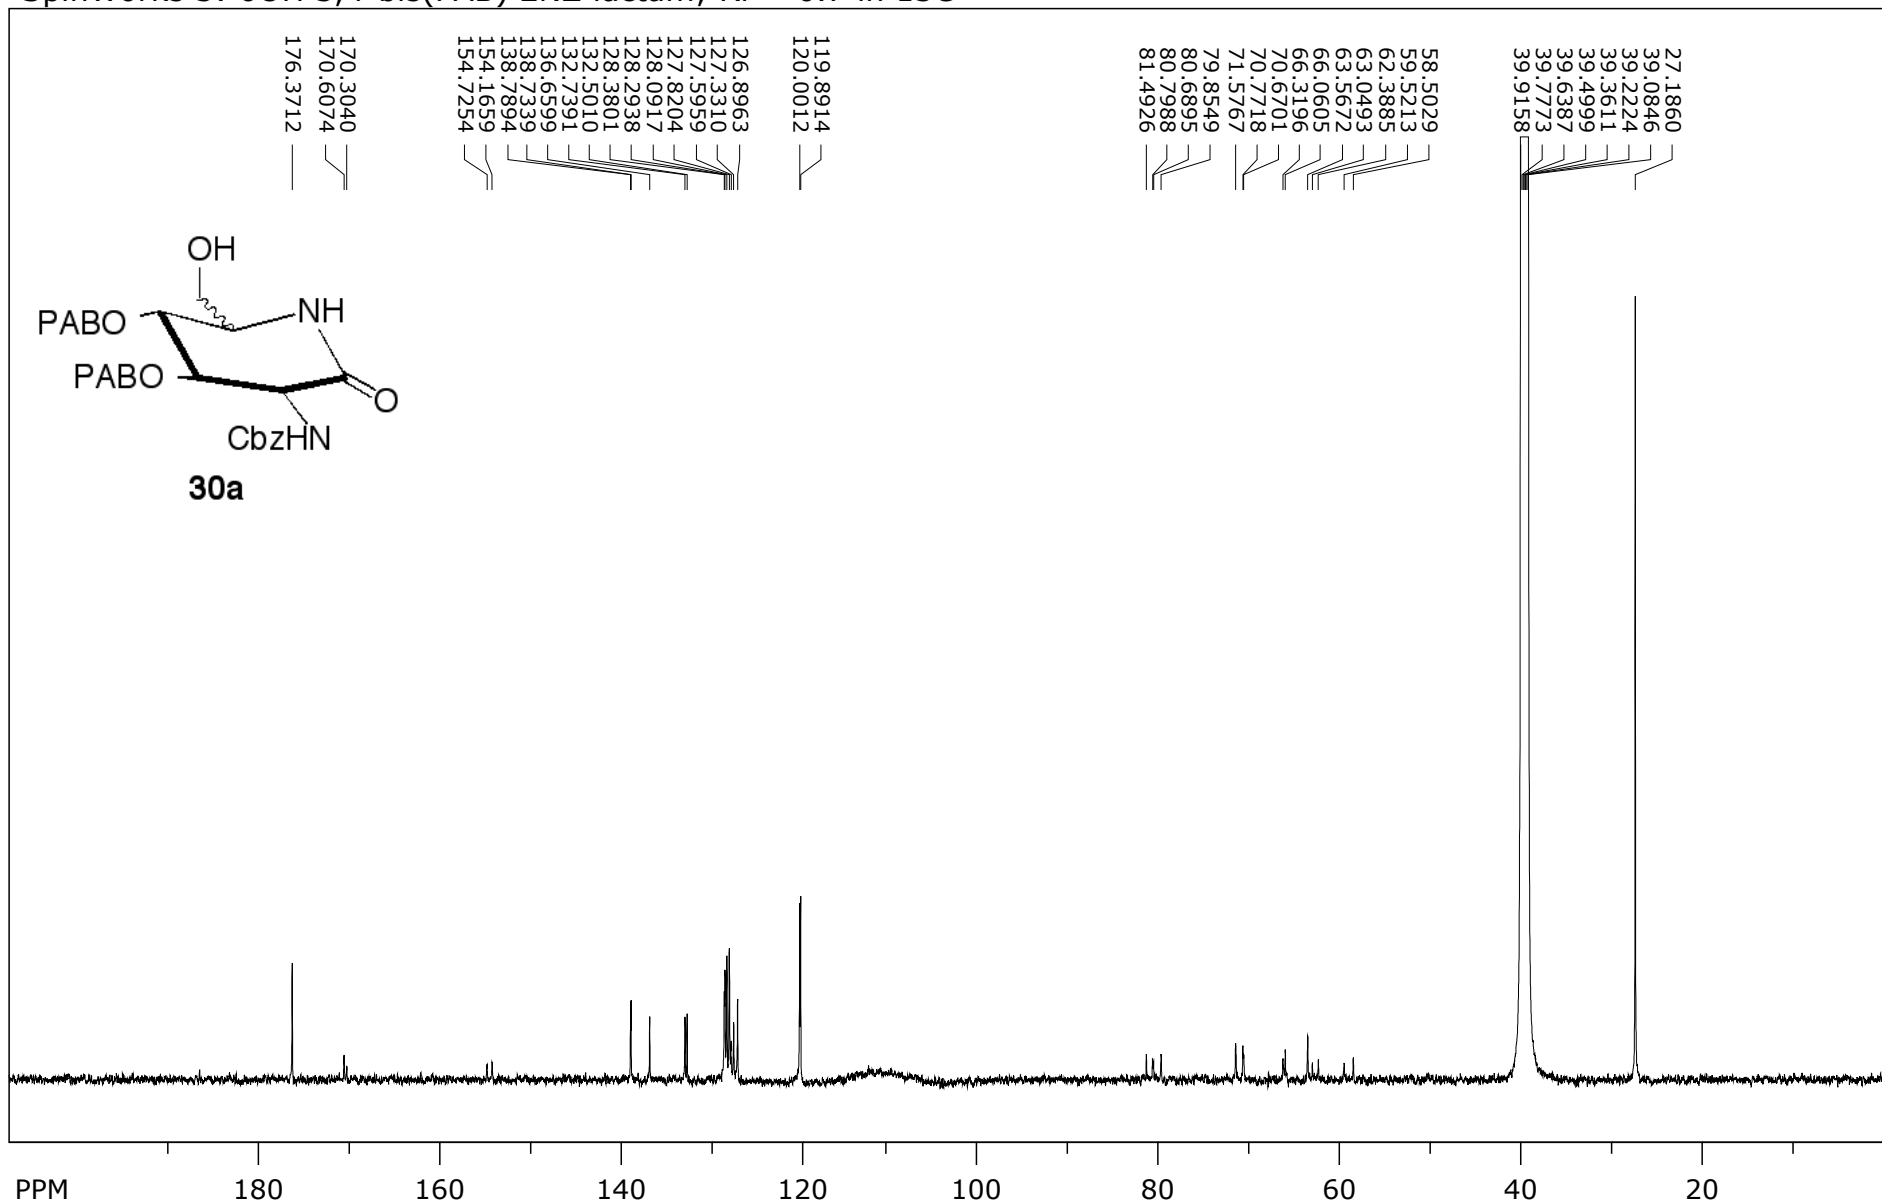

file: ...7\_6OH34PAB2Lactam\_13C\_pl112k\1\fid expt: <zgpg30>  
transmitter freq.: 151.023519 MHz  
time domain size: 65536 points  
width: 36057.69 Hz = 238.7555 ppm = 0.550197 Hz/pt  
number of scans: 112640

freq. of 0 ppm: 151.008493 MHz  
processed size: 32768 complex points  
LB: 5.000 GF: 0.0000  
Hz/cm: 1262.824 ppm/cm: 8.36177

|               |                      |             |                      |                 |              |                        |                       |
|---------------|----------------------|-------------|----------------------|-----------------|--------------|------------------------|-----------------------|
| Sample Name   | Jeff-40              | Position    | Vial 26              | Instrument Name | Instrument 1 | User Name              | DYL                   |
| Inj Vol       | 2                    | InjPosition |                      | SampleType      | Unknown      | IRM Calibration Status | Some Ions Missed      |
| Data Filename | C18_Elution2_S40_Jef | ACQ Method  | C18 waters symmetry2 | Comment         |              | Acquired Time          | 9/15/2012 11:26:01 AM |

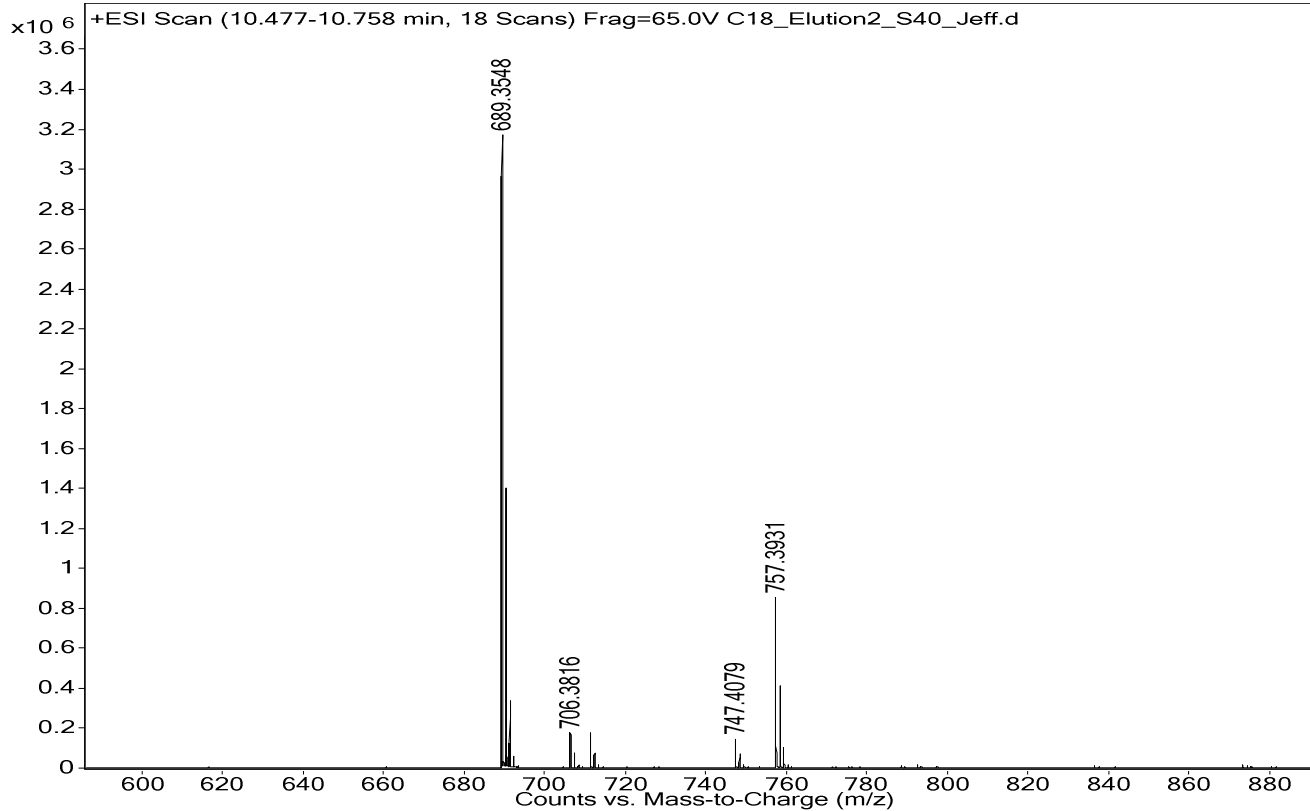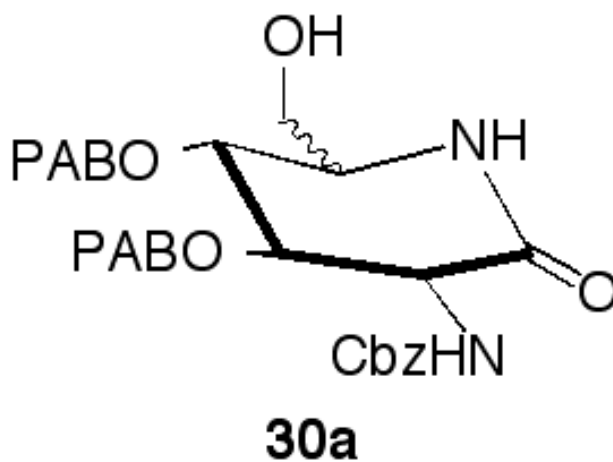

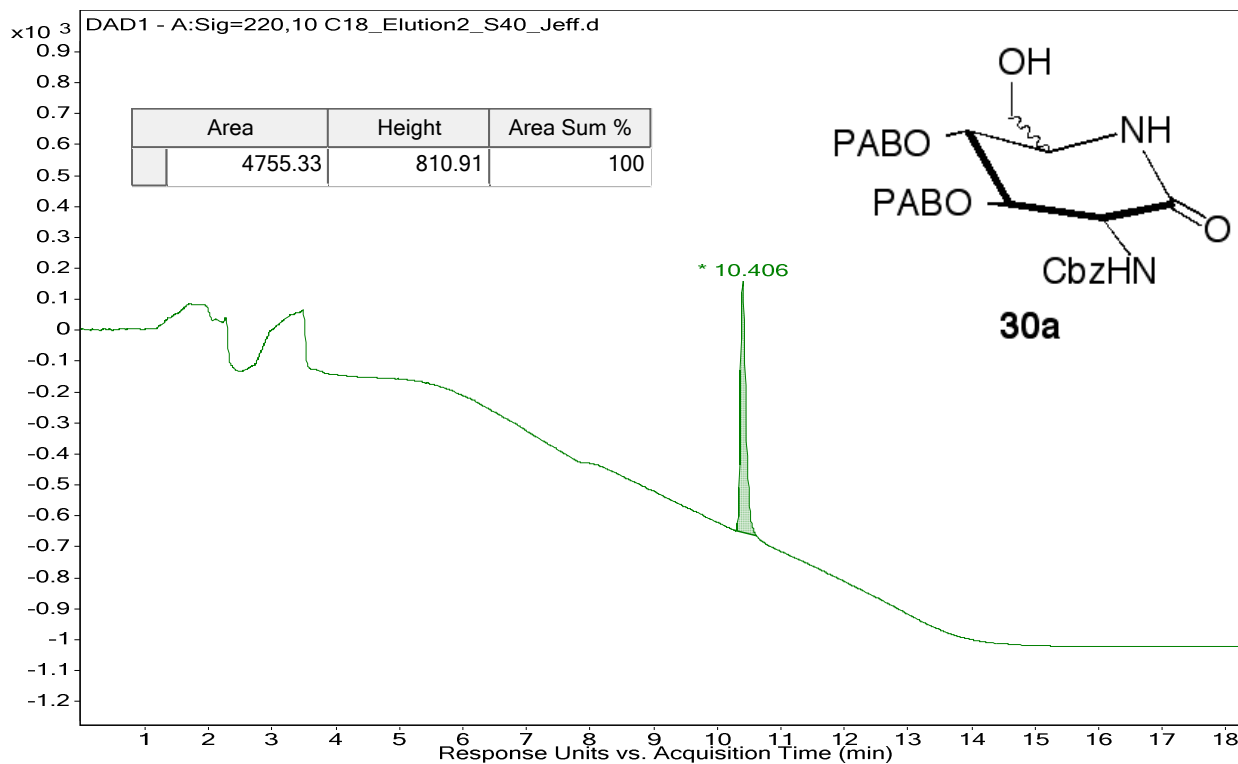

|               |                      |             |                      |                 |              |                        |                       |
|---------------|----------------------|-------------|----------------------|-----------------|--------------|------------------------|-----------------------|
| Sample Name   | Jeff-40              | Position    | Vial 26              | Instrument Name | Instrument 1 | User Name              | DYL                   |
| Inj Vol       | 2                    | InjPosition |                      | SampleType      | Unknown      | IRM Calibration Status | Some Ions Missed      |
| Data Filename | C18_Elution2_S40_Jef | ACQ Method  | C18 waters symmetry2 | Comment         |              | Acquired Time          | 9/15/2012 11:26:01 AM |

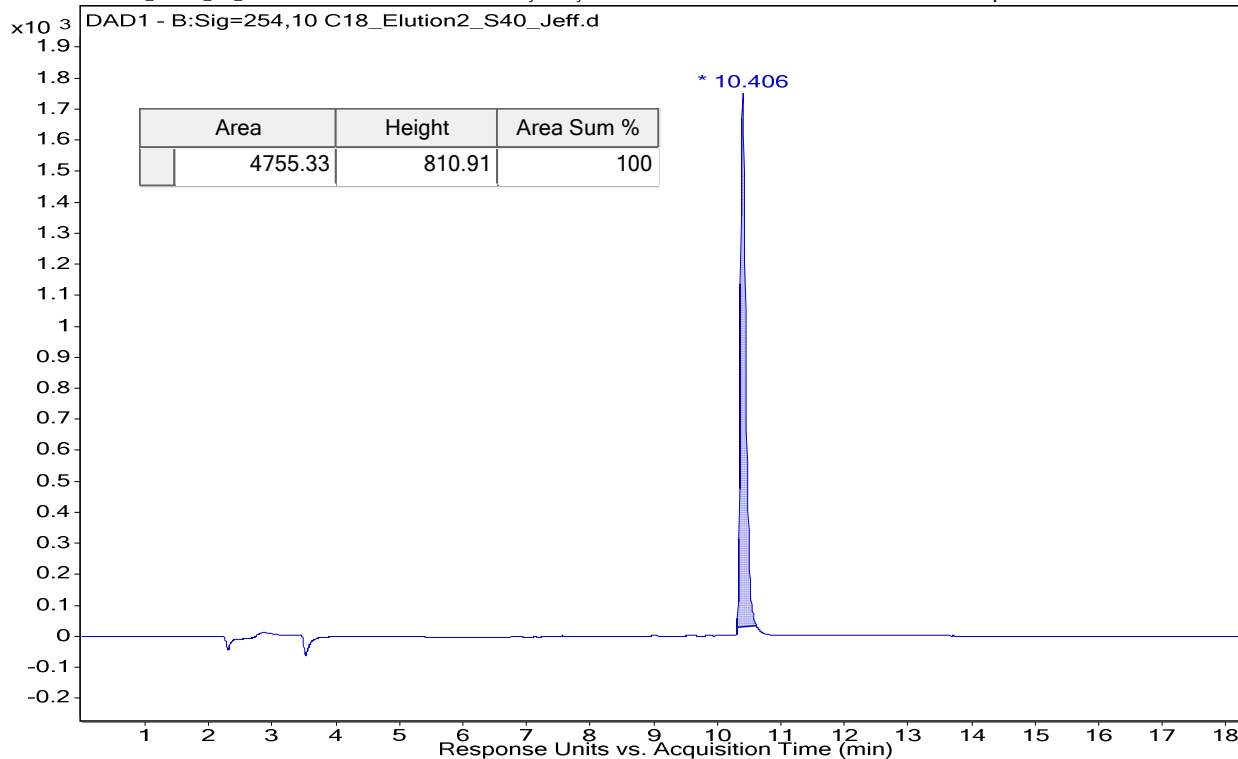

Analysis on a Waters SymmetryShield™ C18 (4.6 mm X 15 cm (i.d. x l.), 3.5 μm) at 0.5 mL/min. Solvent A: 50 mM NH<sub>4</sub>OAc (aq); B: CH<sub>3</sub>CN

| Time [min] | % B |
|------------|-----|
| 0          | 20  |
| 1          | 20  |
| 10         | 100 |
| 20         | 100 |

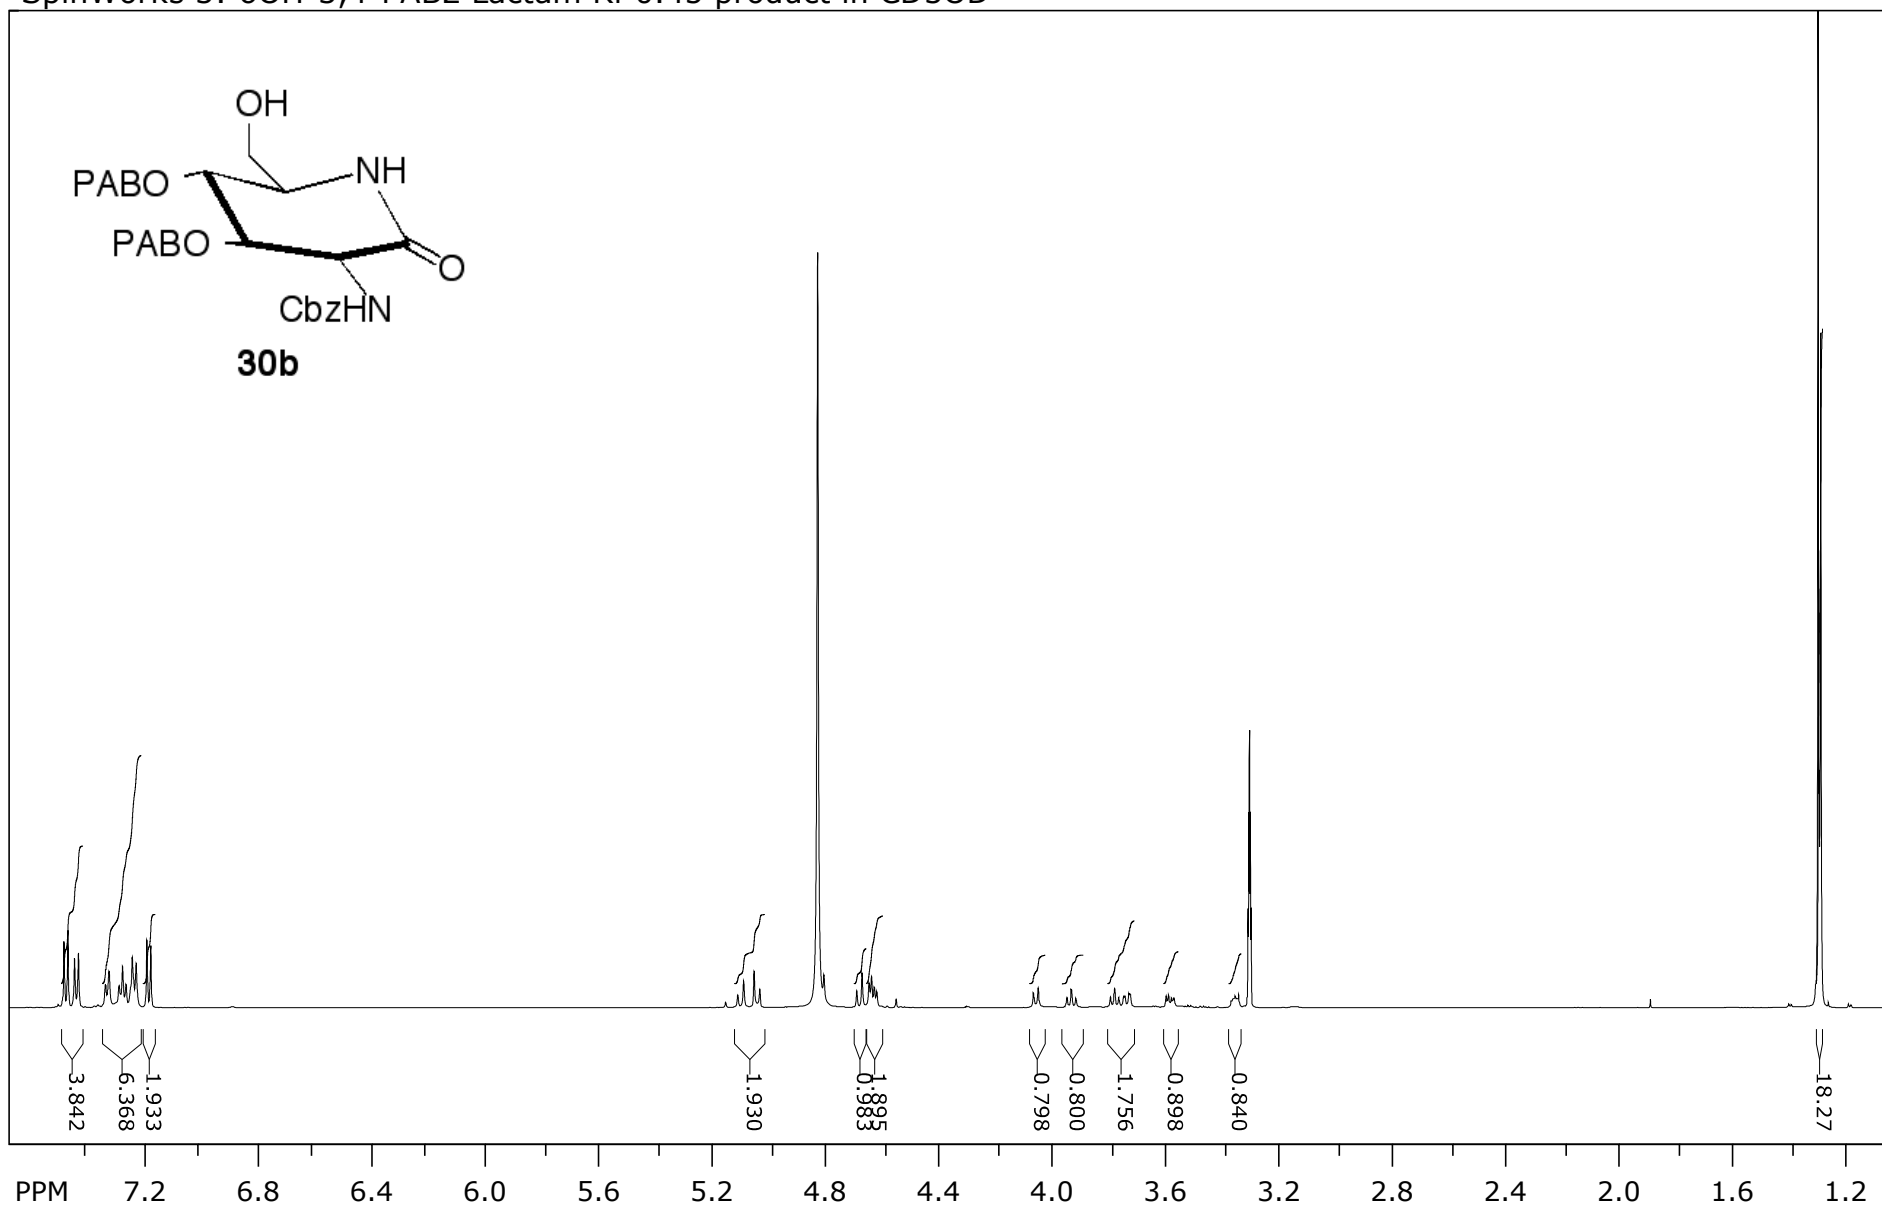

file: ...MR Data\6OHLactam0\_45CD3OD1H\1\fid expt: <zgpr>  
transmitter freq.: 600.553538 MHz  
time domain size: 65536 points  
width: 8417.51 Hz = 14.0162 ppm = 0.128441 Hz/pt  
number of scans: 32

freq. of 0 ppm: 600.550023 MHz  
processed size: 262144 complex points  
LB: 0.000 GF: 0.0000  
Hz/cm: 160.104 ppm/cm: 0.26659

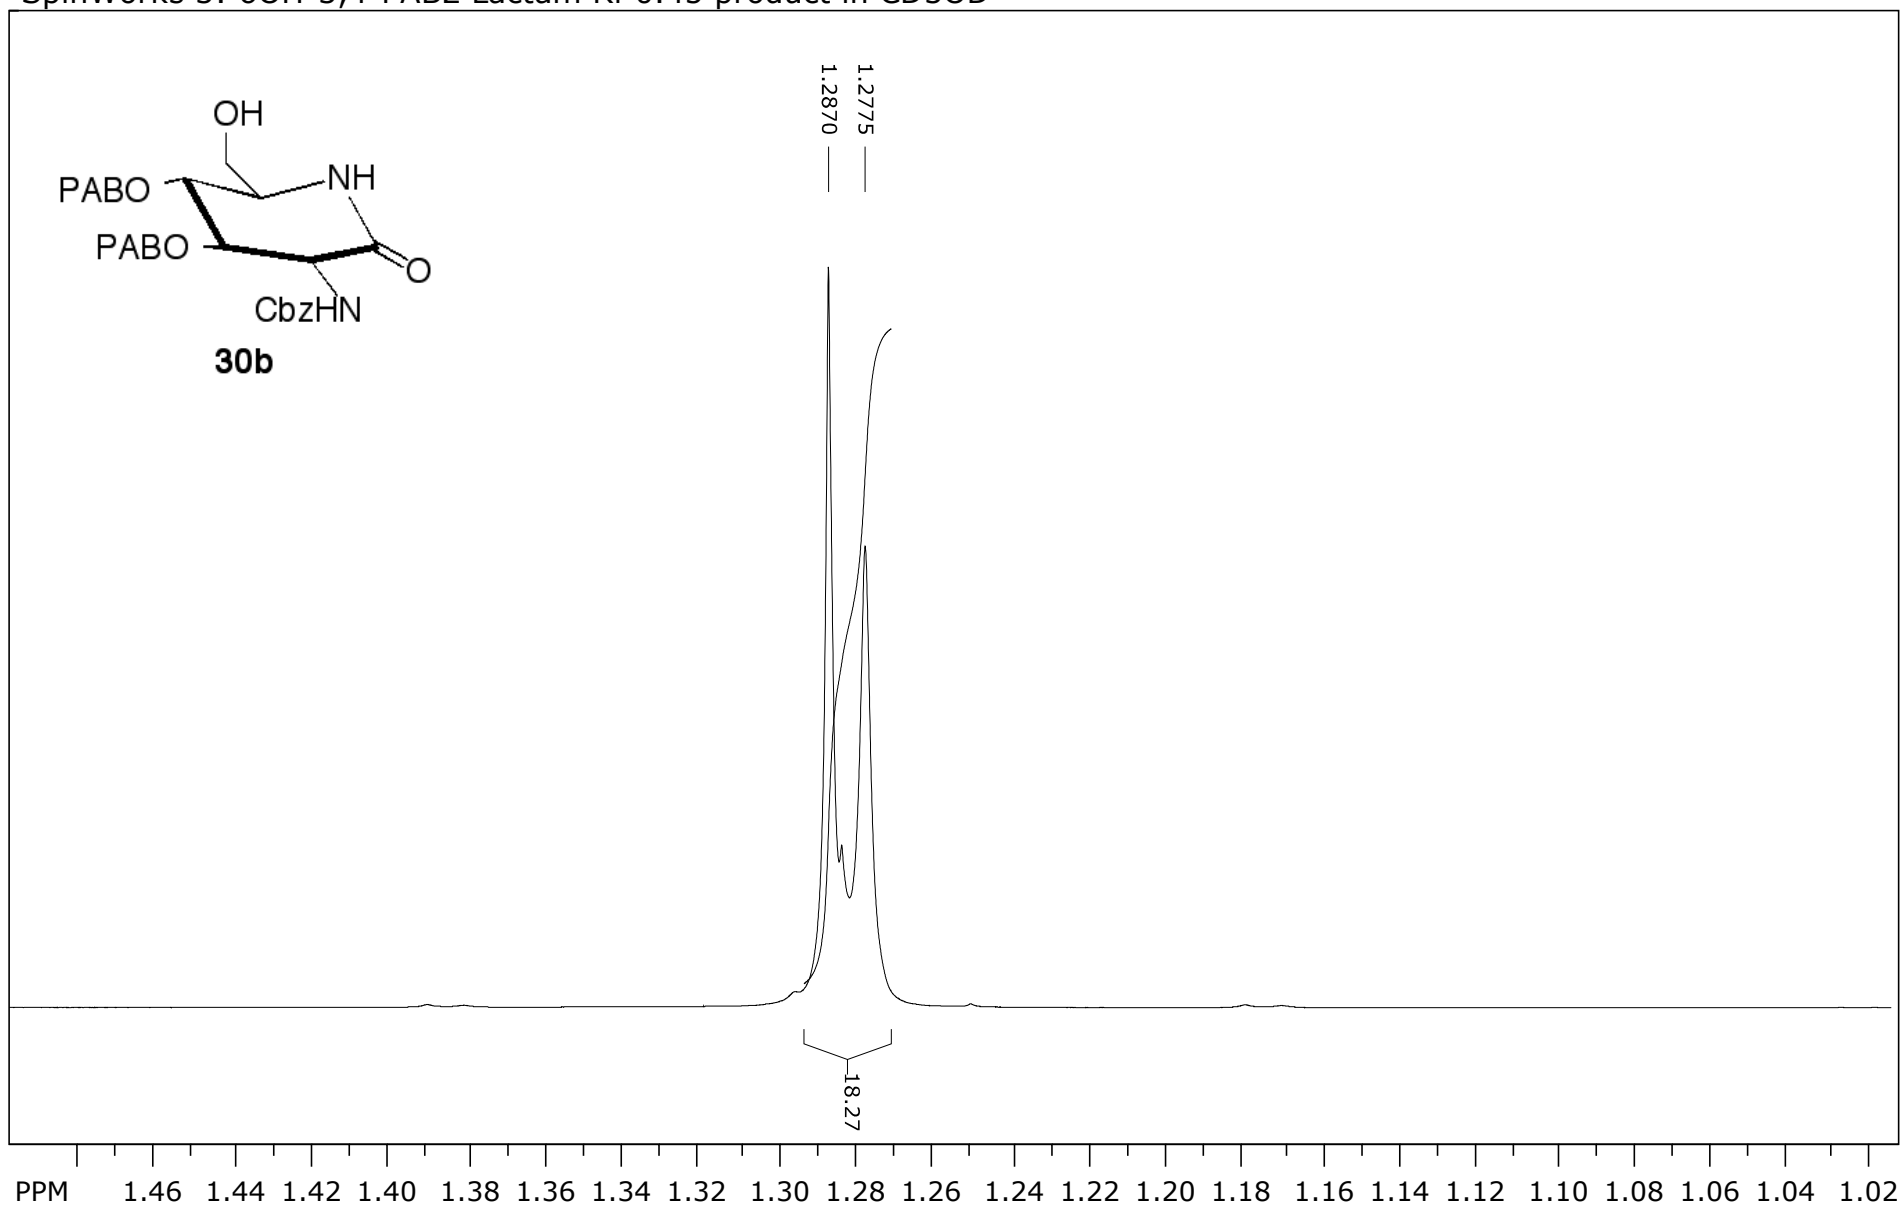

file: ...MR Data\6OHLactam0\_45CD3OD1H\1\fid expt: <zgpr>  
transmitter freq.: 600.553538 MHz  
time domain size: 65536 points  
width: 8417.51 Hz = 14.0162 ppm = 0.128441 Hz/pt  
number of scans: 32

freq. of 0 ppm: 600.550023 MHz  
processed size: 262144 complex points  
LB: 0.000 GF: 0.0000  
Hz/cm: 11.674 ppm/cm: 0.01944

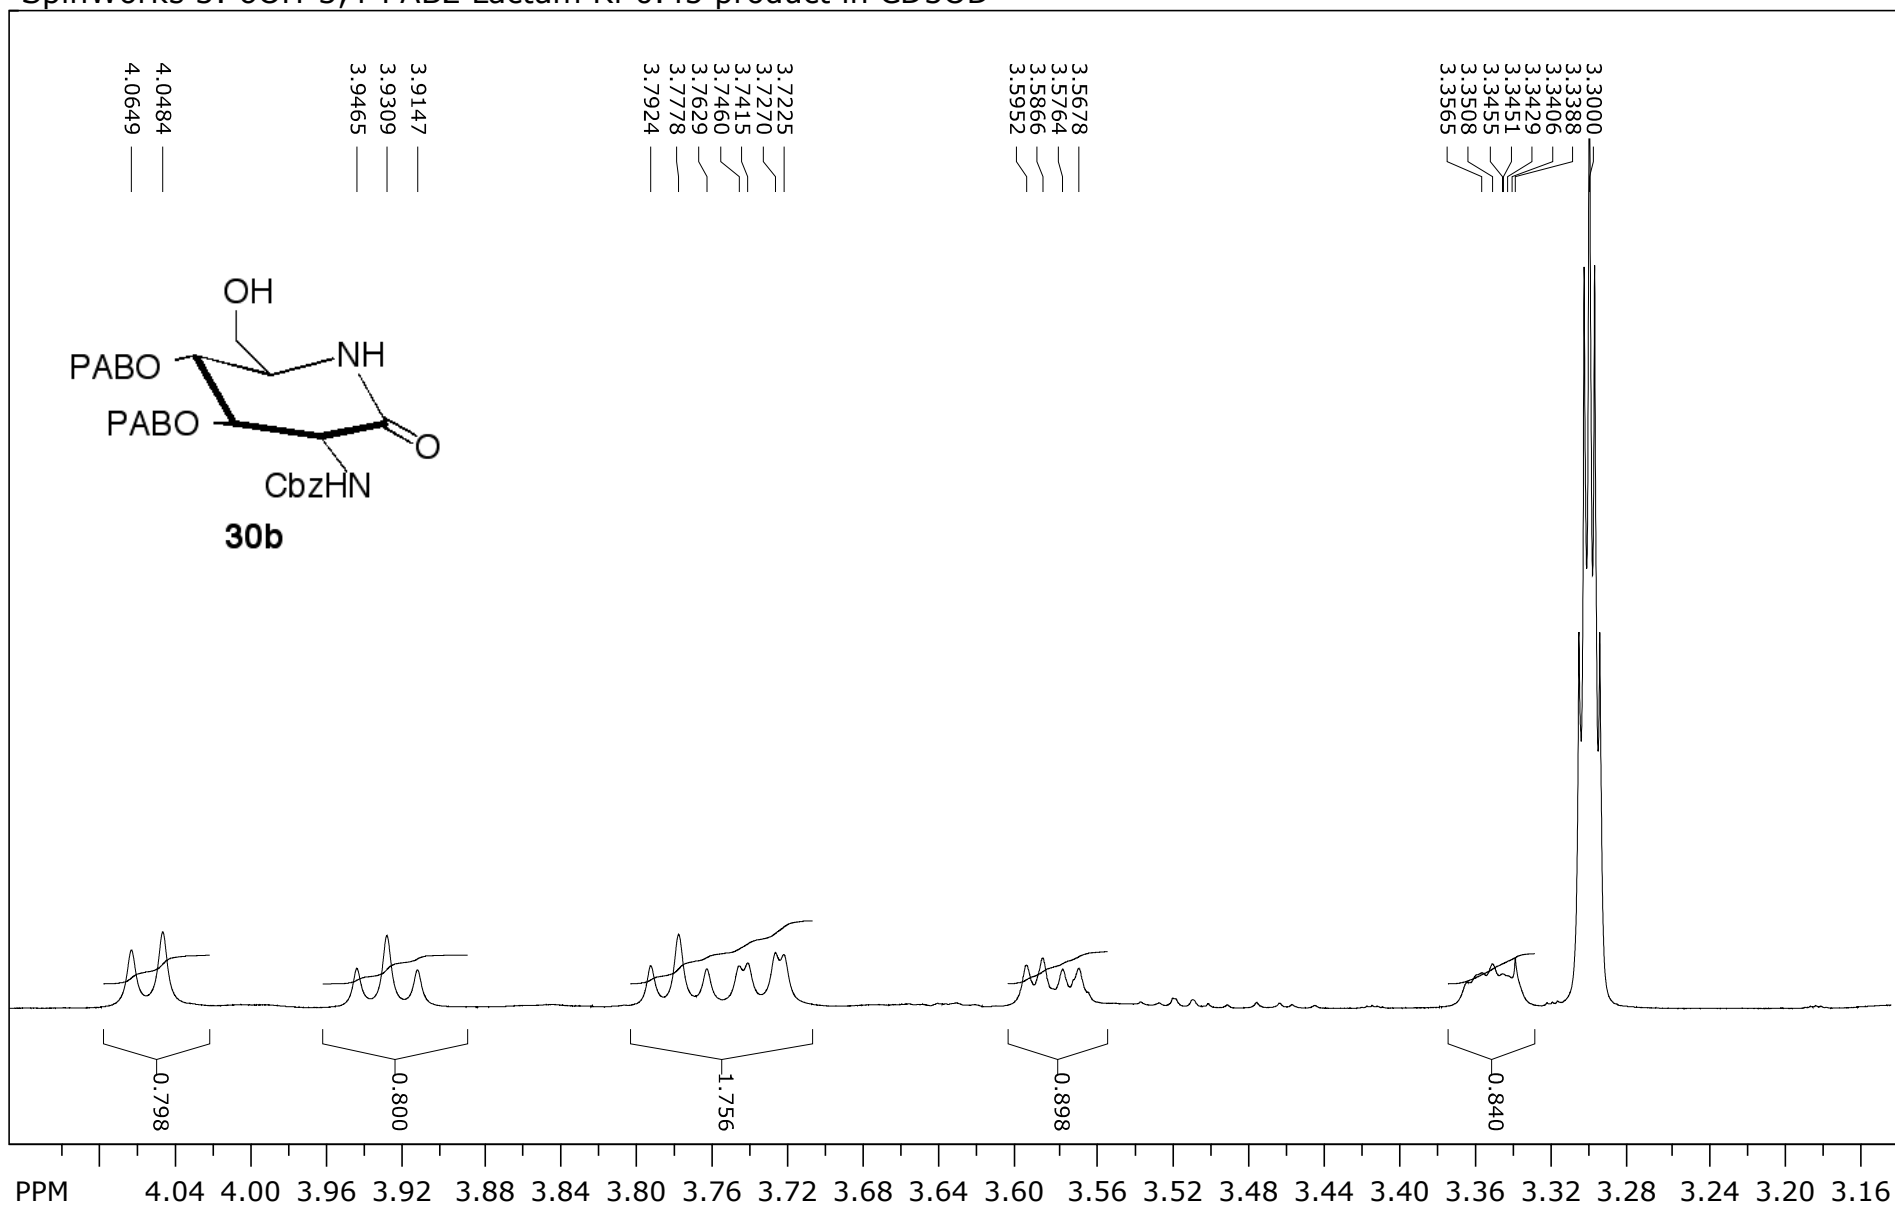

file: ...MR Data\6OHLactam0\_45CD3OD1H\1\fid expt: <zgpr>  
transmitter freq.: 600.553538 MHz  
time domain size: 65536 points  
width: 8417.51 Hz = 14.0162 ppm = 0.128441 Hz/pt  
number of scans: 32

freq. of 0 ppm: 600.550023 MHz  
processed size: 262144 complex points  
LB: 0.000 GF: 0.0000  
Hz/cm: 23.719 ppm/cm: 0.03950

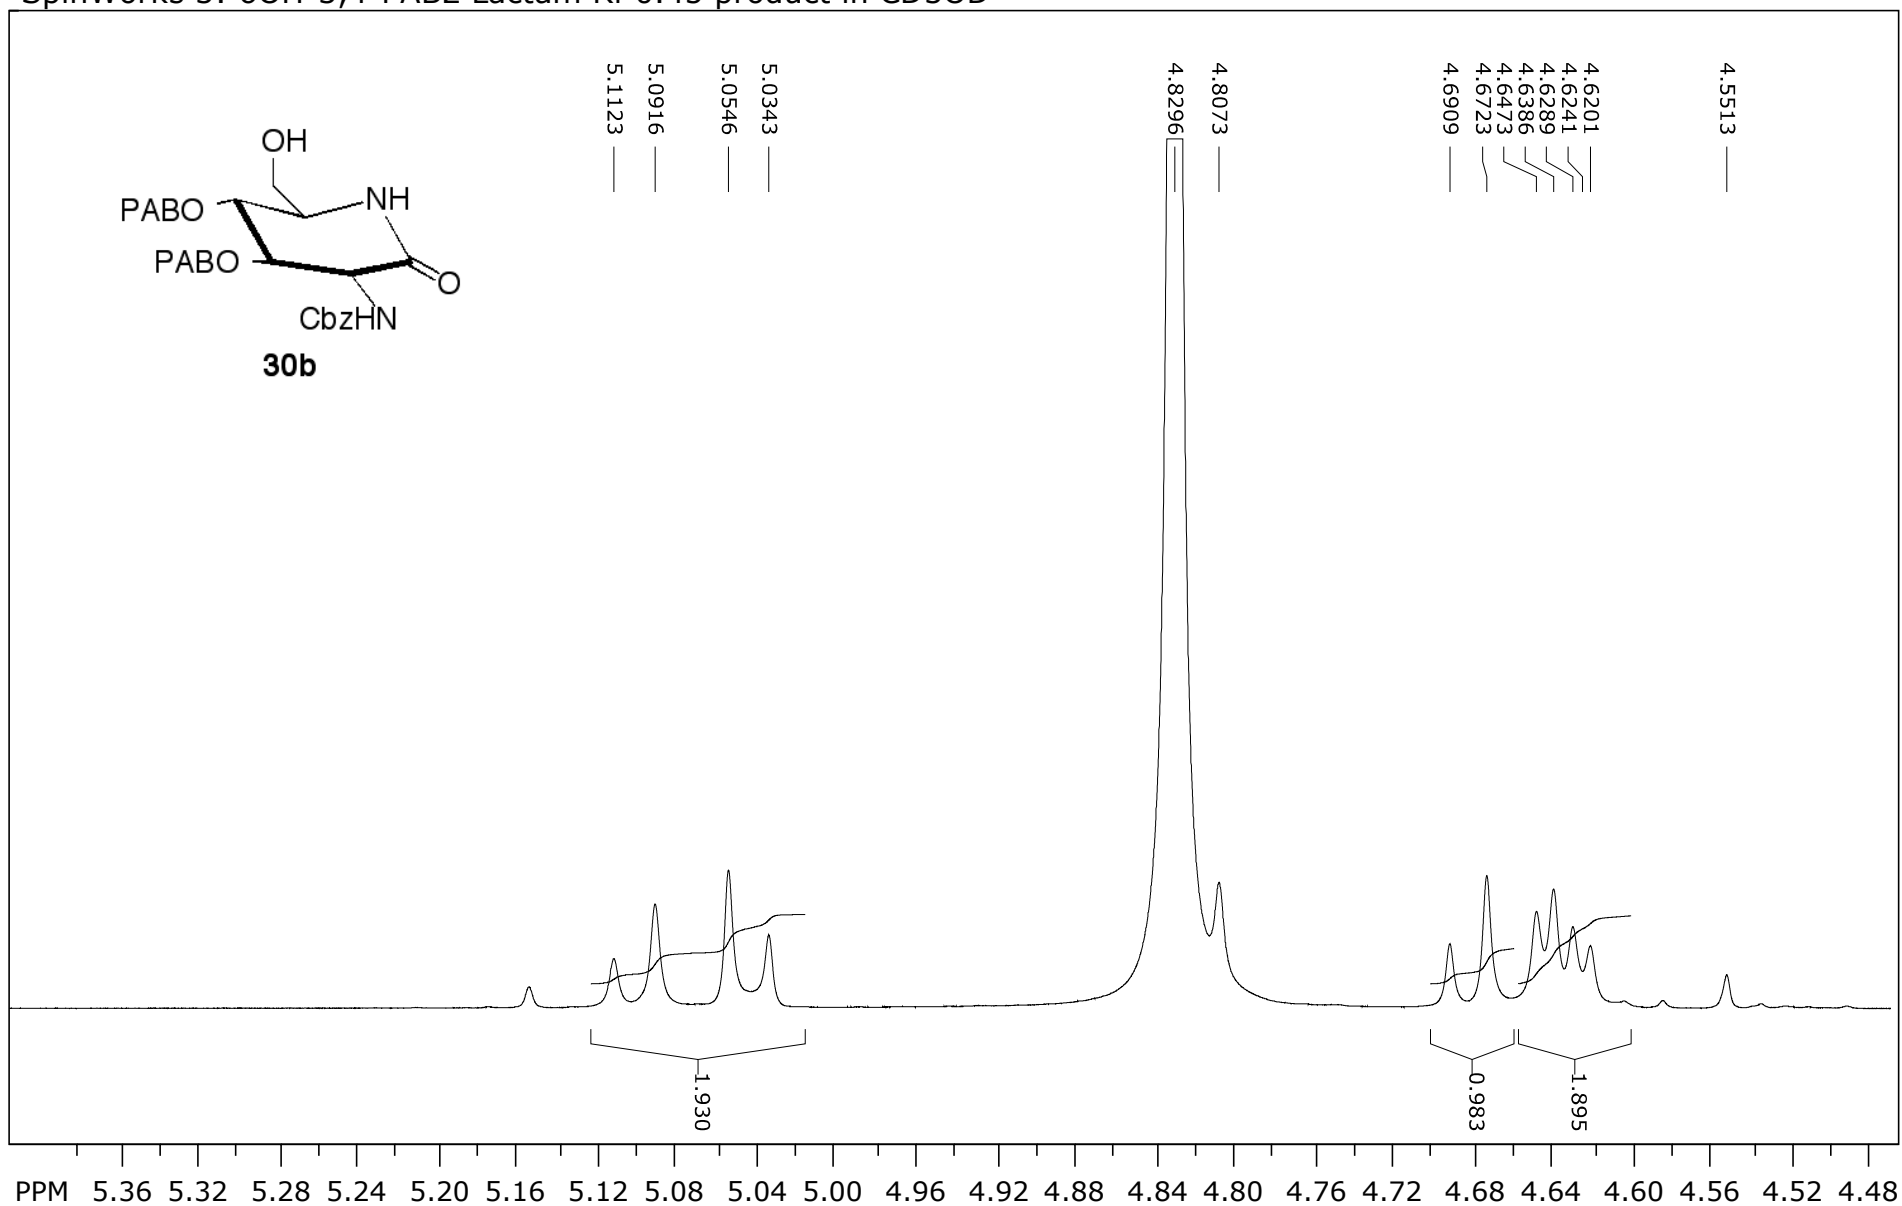

file: ...MR Data\6OHLactam0\_45CD3OD1H\1\fid expt: <zgpr>  
transmitter freq.: 600.553538 MHz  
time domain size: 65536 points  
width: 8417.51 Hz = 14.0162 ppm = 0.128441 Hz/pt  
number of scans: 32

freq. of 0 ppm: 600.550023 MHz  
processed size: 262144 complex points  
LB: 0.000 GF: 0.0000  
Hz/cm: 22.793 ppm/cm: 0.03795



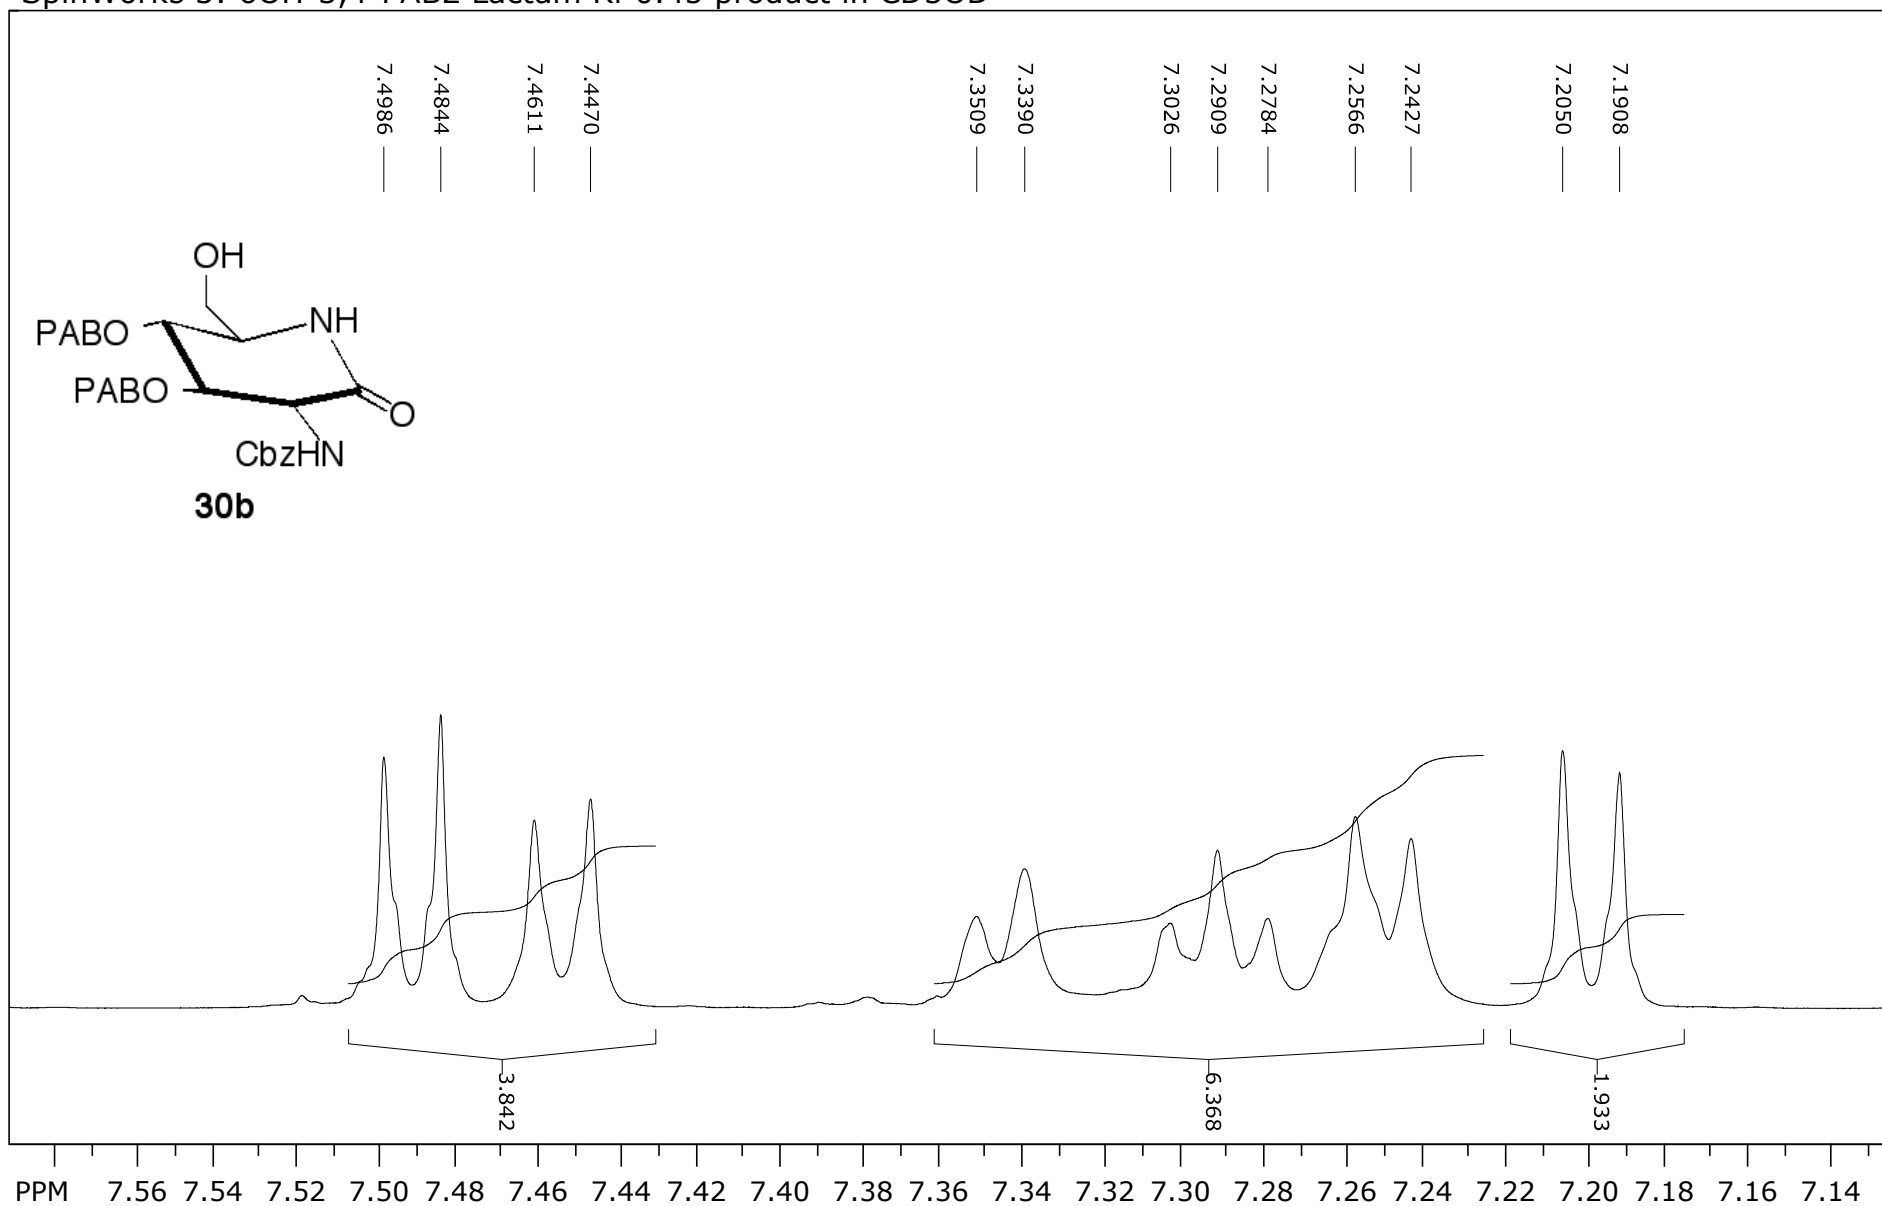

file: ...MR Data\6OHLactam0\_45CD3OD1H\1\fid expt: <zgpr>  
transmitter freq.: 600.553538 MHz  
time domain size: 65536 points  
width: 8417.51 Hz = 14.0162 ppm = 0.128441 Hz/pt  
number of scans: 32

freq. of 0 ppm: 600.550023 MHz  
processed size: 262144 complex points  
LB: 0.000 GF: 0.0000  
Hz/cm: 11.260 ppm/cm: 0.01875

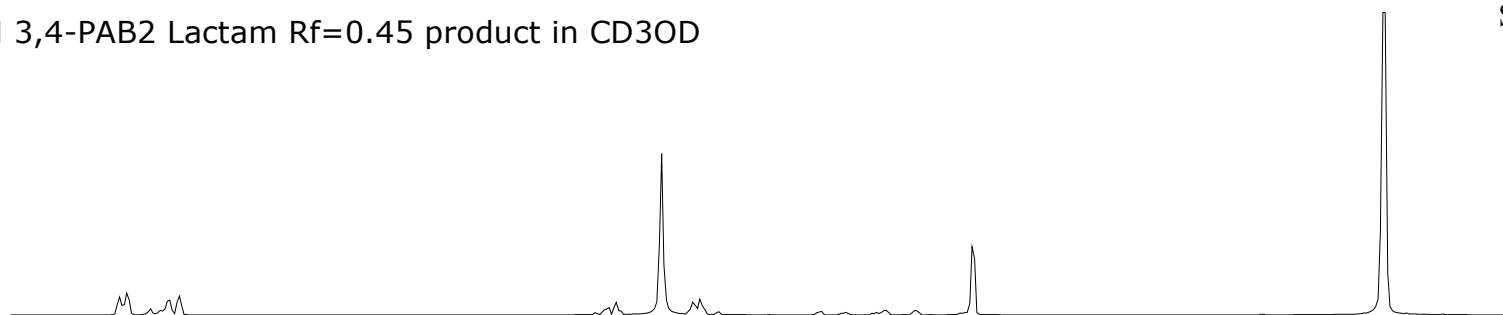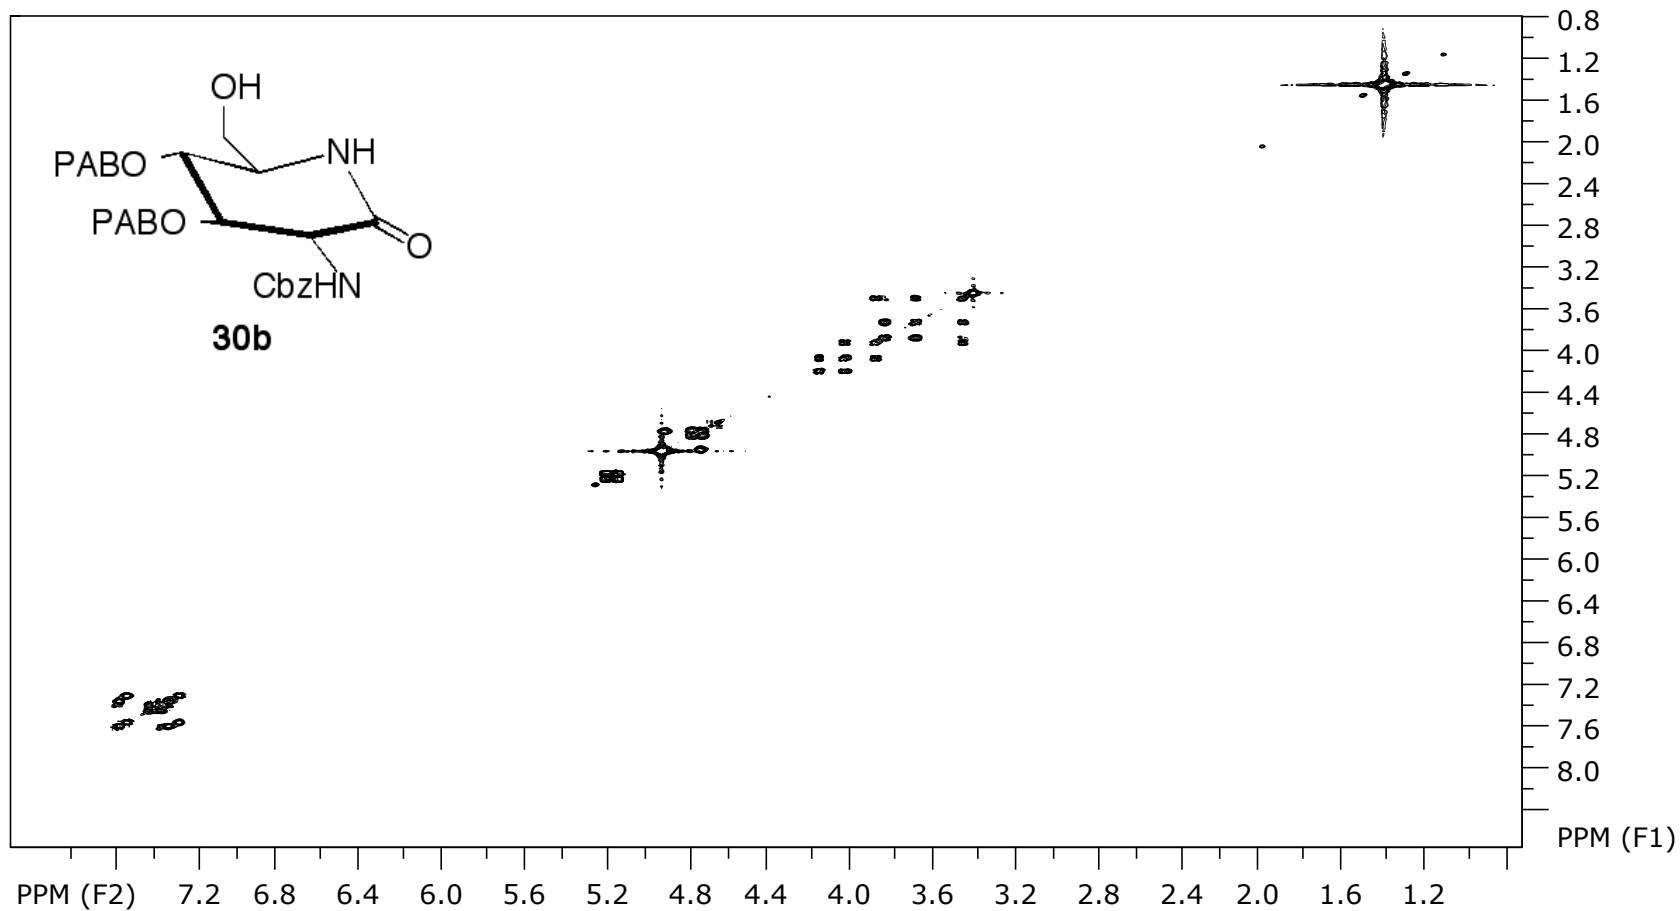

file: ... Data\6OHLactam0\_45CD3ODCOSY\1\ser  
 expt: <cosygpqf>  
 transmitter freq: 600.552832 MHz  
 time domain size: 2048 by 1024 points  
 width (F2): 7211.54 Hz = 12.0082 ppm = 3.5213 Hz/pt  
 number of scans: 1

F2: freq. of 0 ppm: 600.5499623 MHz  
 processed size: 1024 complex points  
 window function: Sine  
 shift: 0.0 degrees  
 Hz/cm: 221.801 ppm/cm: 0.36933

F1: freq. of 0 ppm: 600.5499623 MHz  
 processed size: 1024 complex points  
 window function: Sine  
 shift: 0.0 degrees  
 Hz/cm: 435.143 ppm/cm: 0.72457

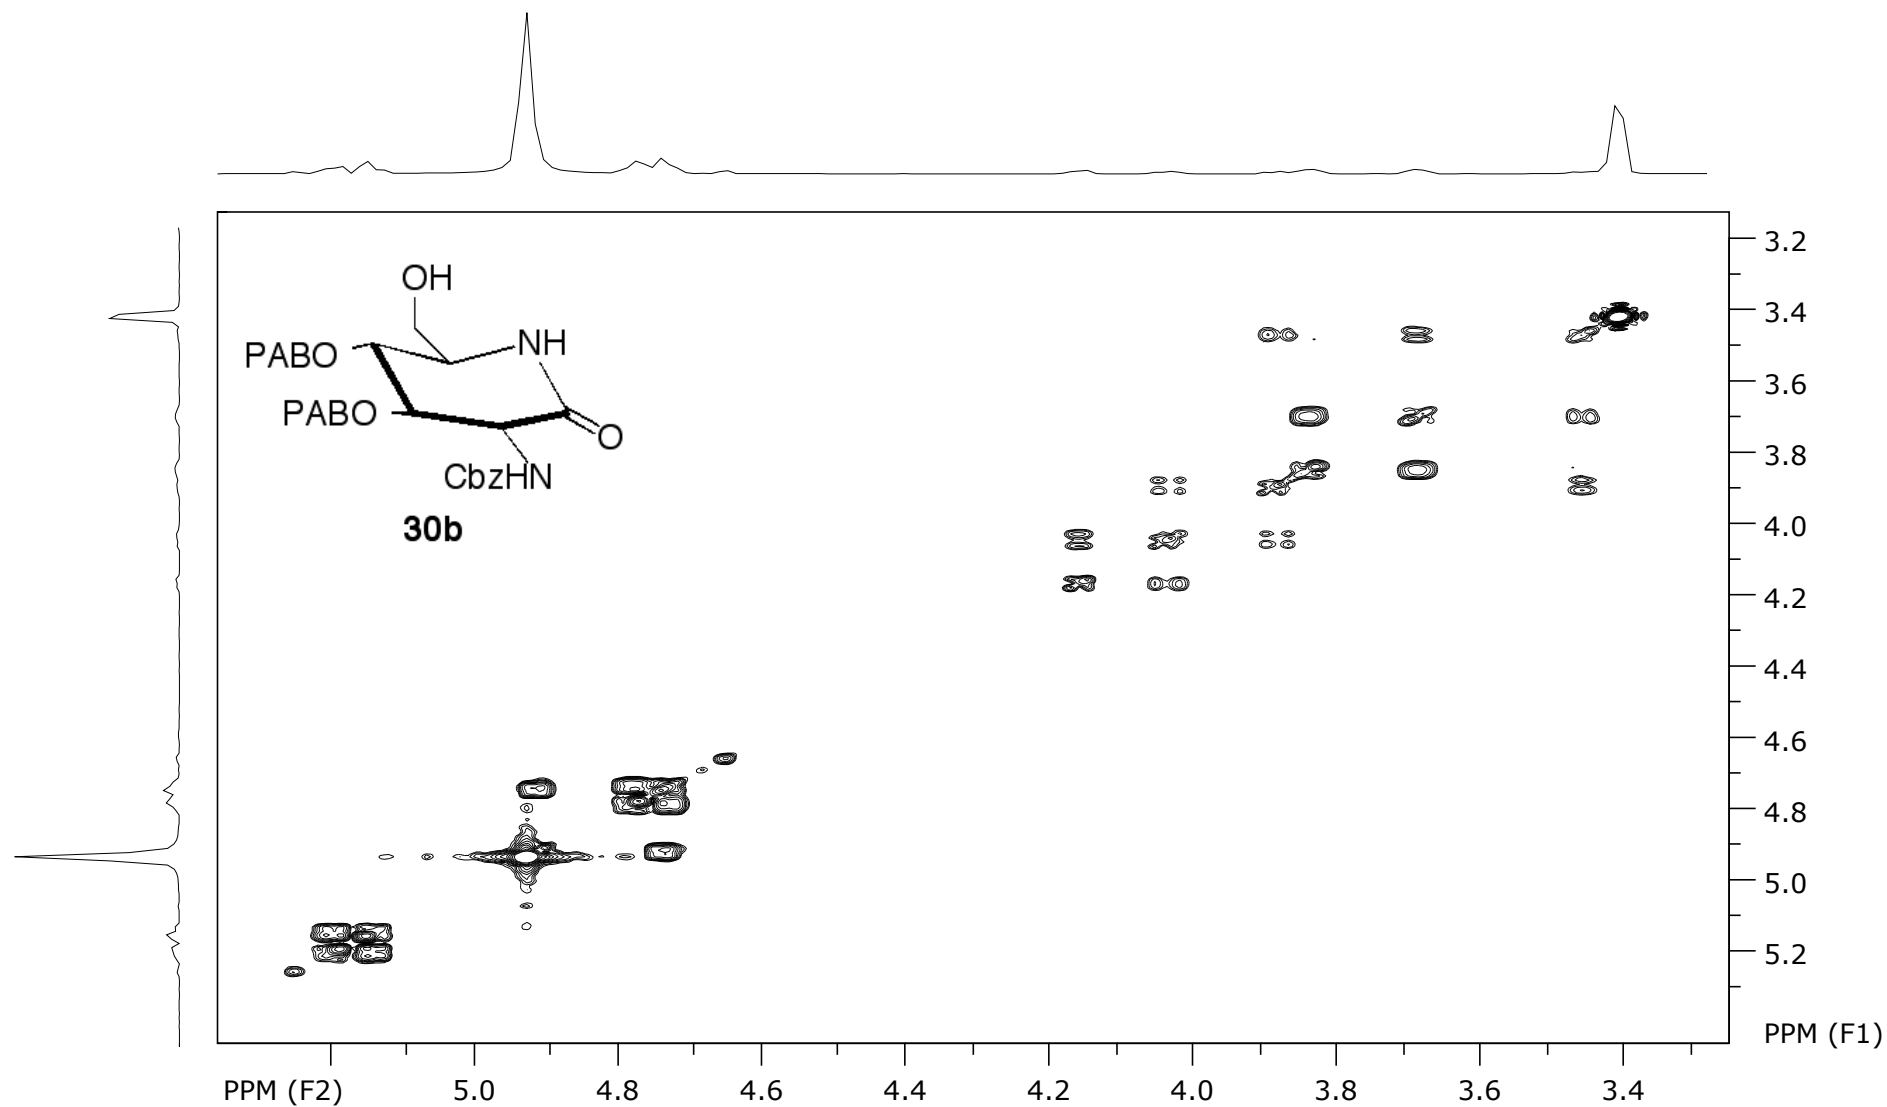

file: ... Data\6OHLactam0\_45CD3ODCOSY\1\ser  
 expt: <cosygpqf>  
 transmitter freq: 600.552832 MHz  
 time domain size: 2048 by 1024 points  
 width (F2): 7211.54 Hz = 12.0082 ppm = 3.5213 Hz/pt  
 number of scans: 1

F2: freq. of 0 ppm: 600.5499623 MHz  
 processed size: 1024 complex points  
 window function: Sine  
 shift: 0.0 degrees  
 Hz/cm: 63.288 ppm/cm: 0.10538

F1: freq. of 0 ppm: 600.5499623 MHz  
 processed size: 1024 complex points  
 window function: Sine  
 shift: 0.0 degrees  
 Hz/cm: 127.375 ppm/cm: 0.21210

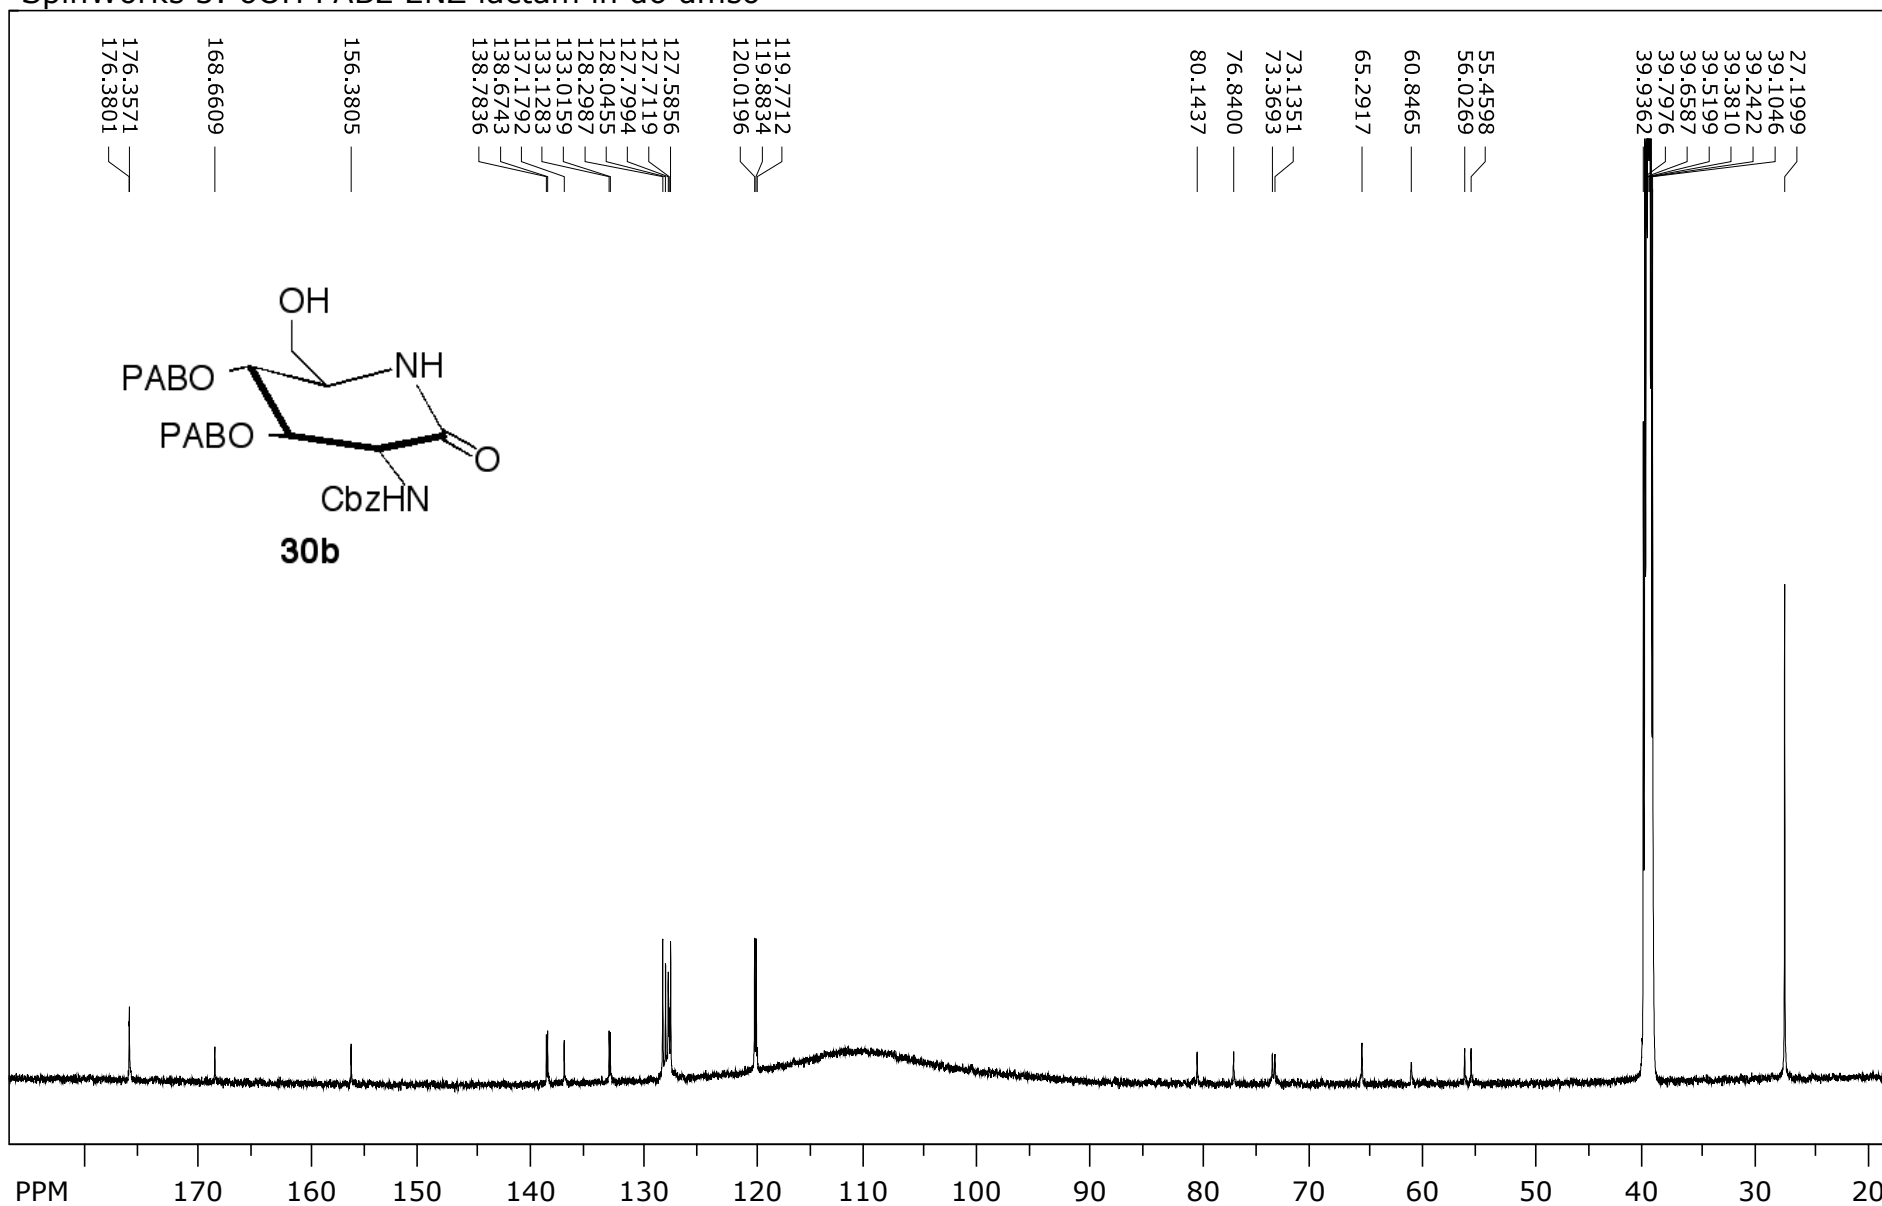

file: ...m spectra\6OHPiv2lactNZ\_dmsol1\fid expt: <zgpg30>  
transmitter freq.: 151.023519 MHz  
time domain size: 65536 points  
width: 36057.69 Hz = 238.7555 ppm = 0.550197 Hz/pt  
number of scans: 22528

freq. of 0 ppm: 151.008491 MHz  
processed size: 32768 complex points  
LB: 2.000 GF: 0.0000  
Hz/cm: 1024.434 ppm/cm: 6.78328

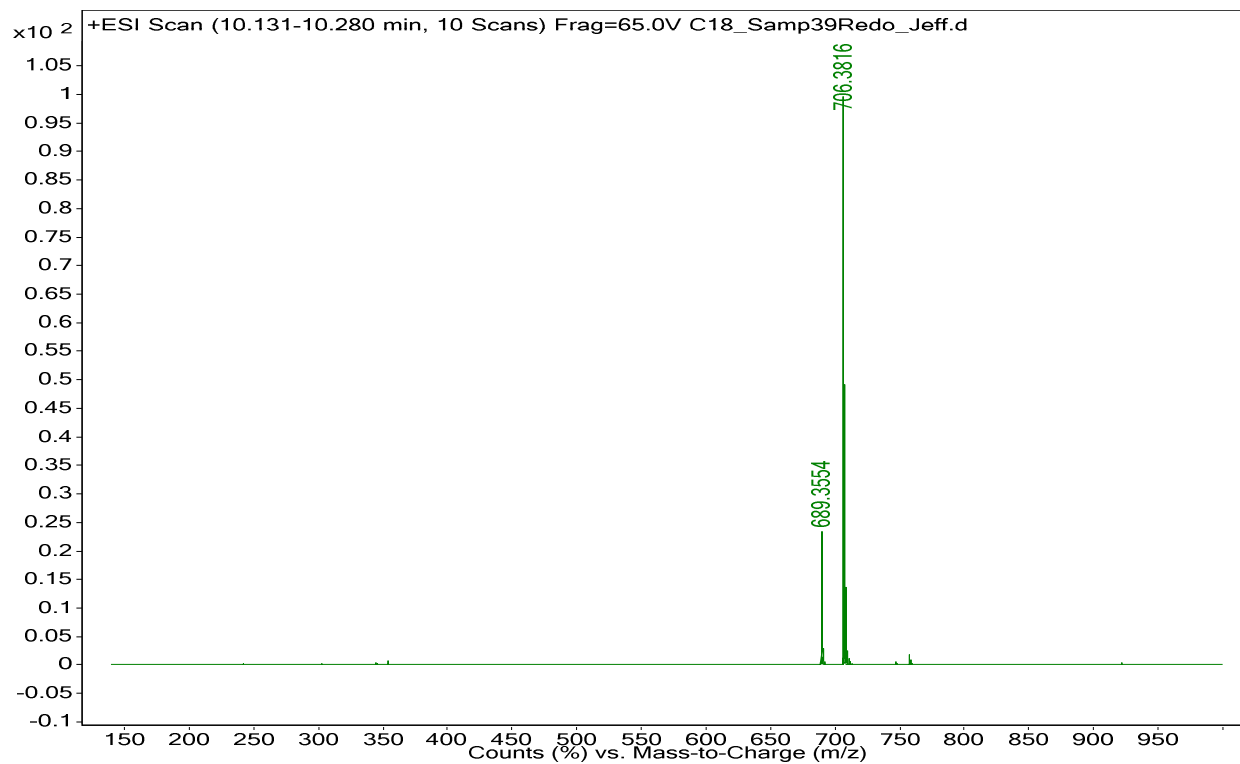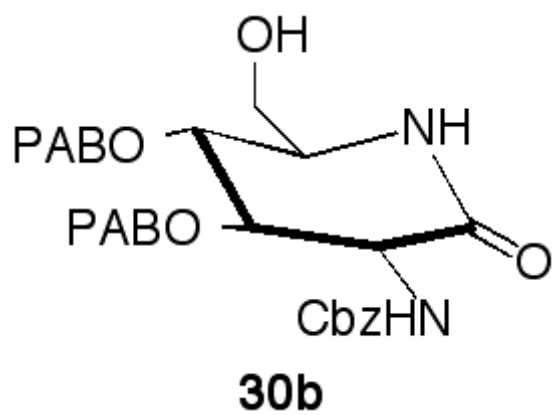

with residual Ammonium Formate

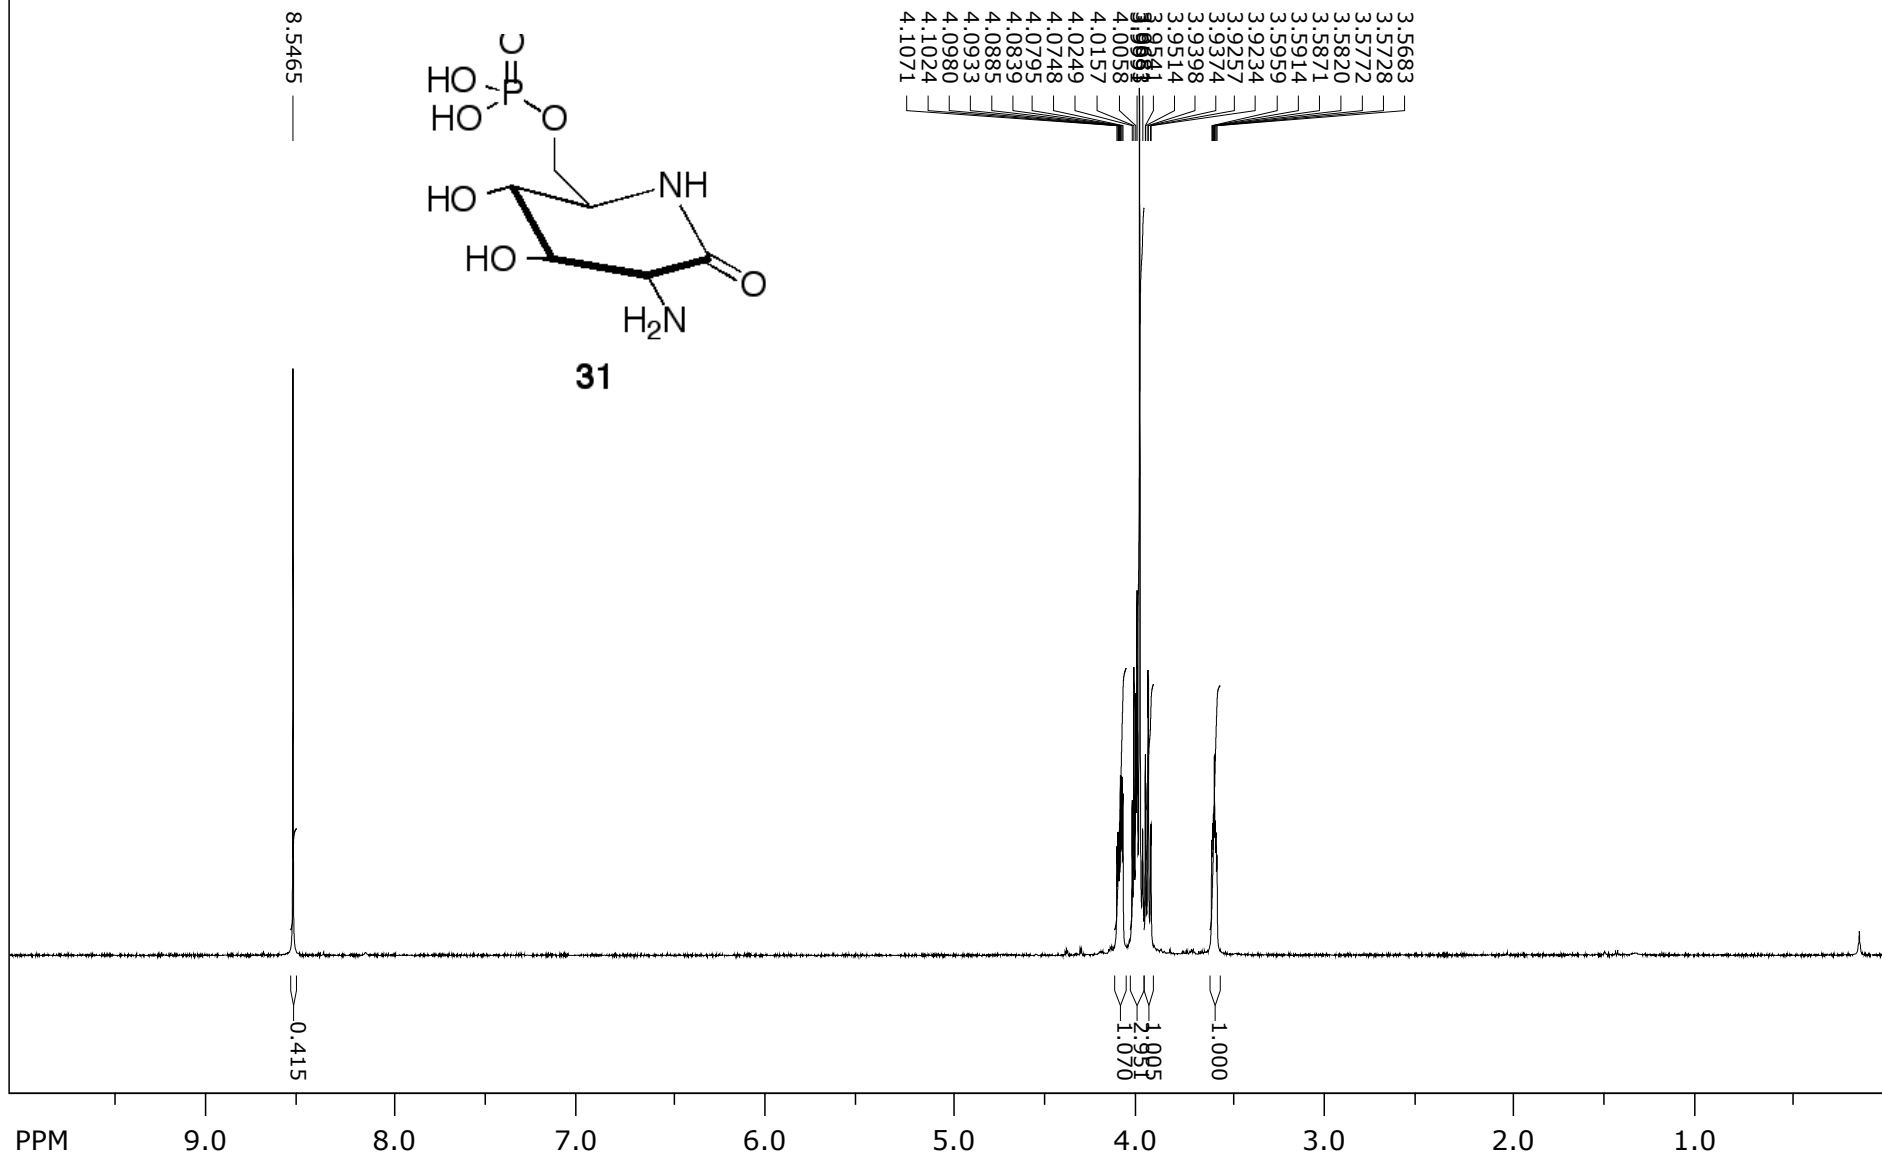

file: ...MR Data\Lactam6PinD2OwAmForm\2\fid expt: <zgpr>  
 transmitter freq.: 600.552832 MHz  
 time domain size: 65536 points  
 width: 9615.38 Hz = 16.0109 ppm = 0.146719 Hz/pt  
 number of scans: 32

freq. of 0 ppm: 600.549962 MHz  
 processed size: 262144 complex points  
 LB: 0.000 GF: 0.0000  
 Hz/cm: 243.604 ppm/cm: 0.40563

with residual Ammonium Formate

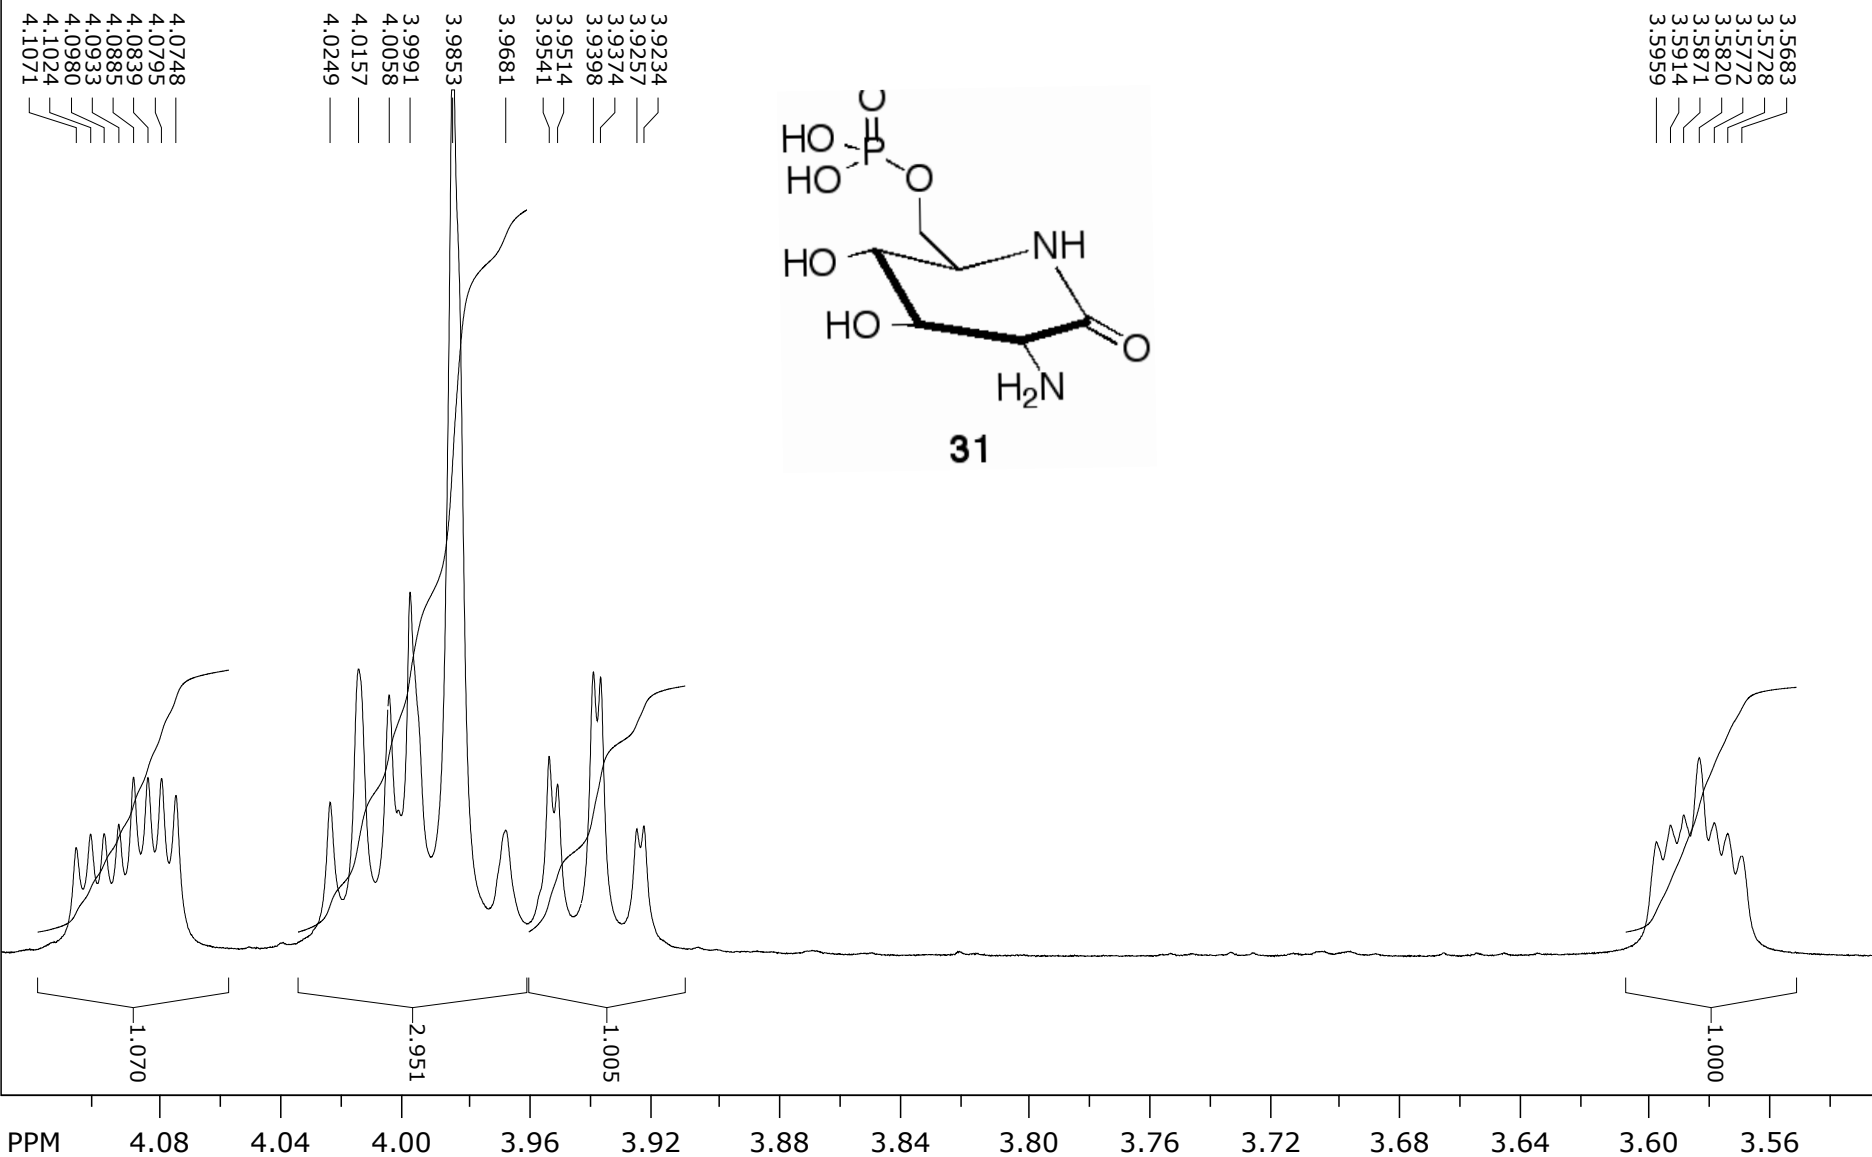

file: ...MR Data\Lactam6PinD2OwAmForm\2\fid exp: <zgpr>  
 transmitter freq.: 600.552832 MHz  
 time domain size: 65536 points  
 width: 9615.38 Hz = 16.0109 ppm = 0.146719 Hz/pt  
 number of scans: 32

freq. of 0 ppm: 600.549962 MHz  
 processed size: 262144 complex points  
 LB: 0.000 GF: 0.0000  
 Hz/cm: 14.624 ppm/cm: 0.02435

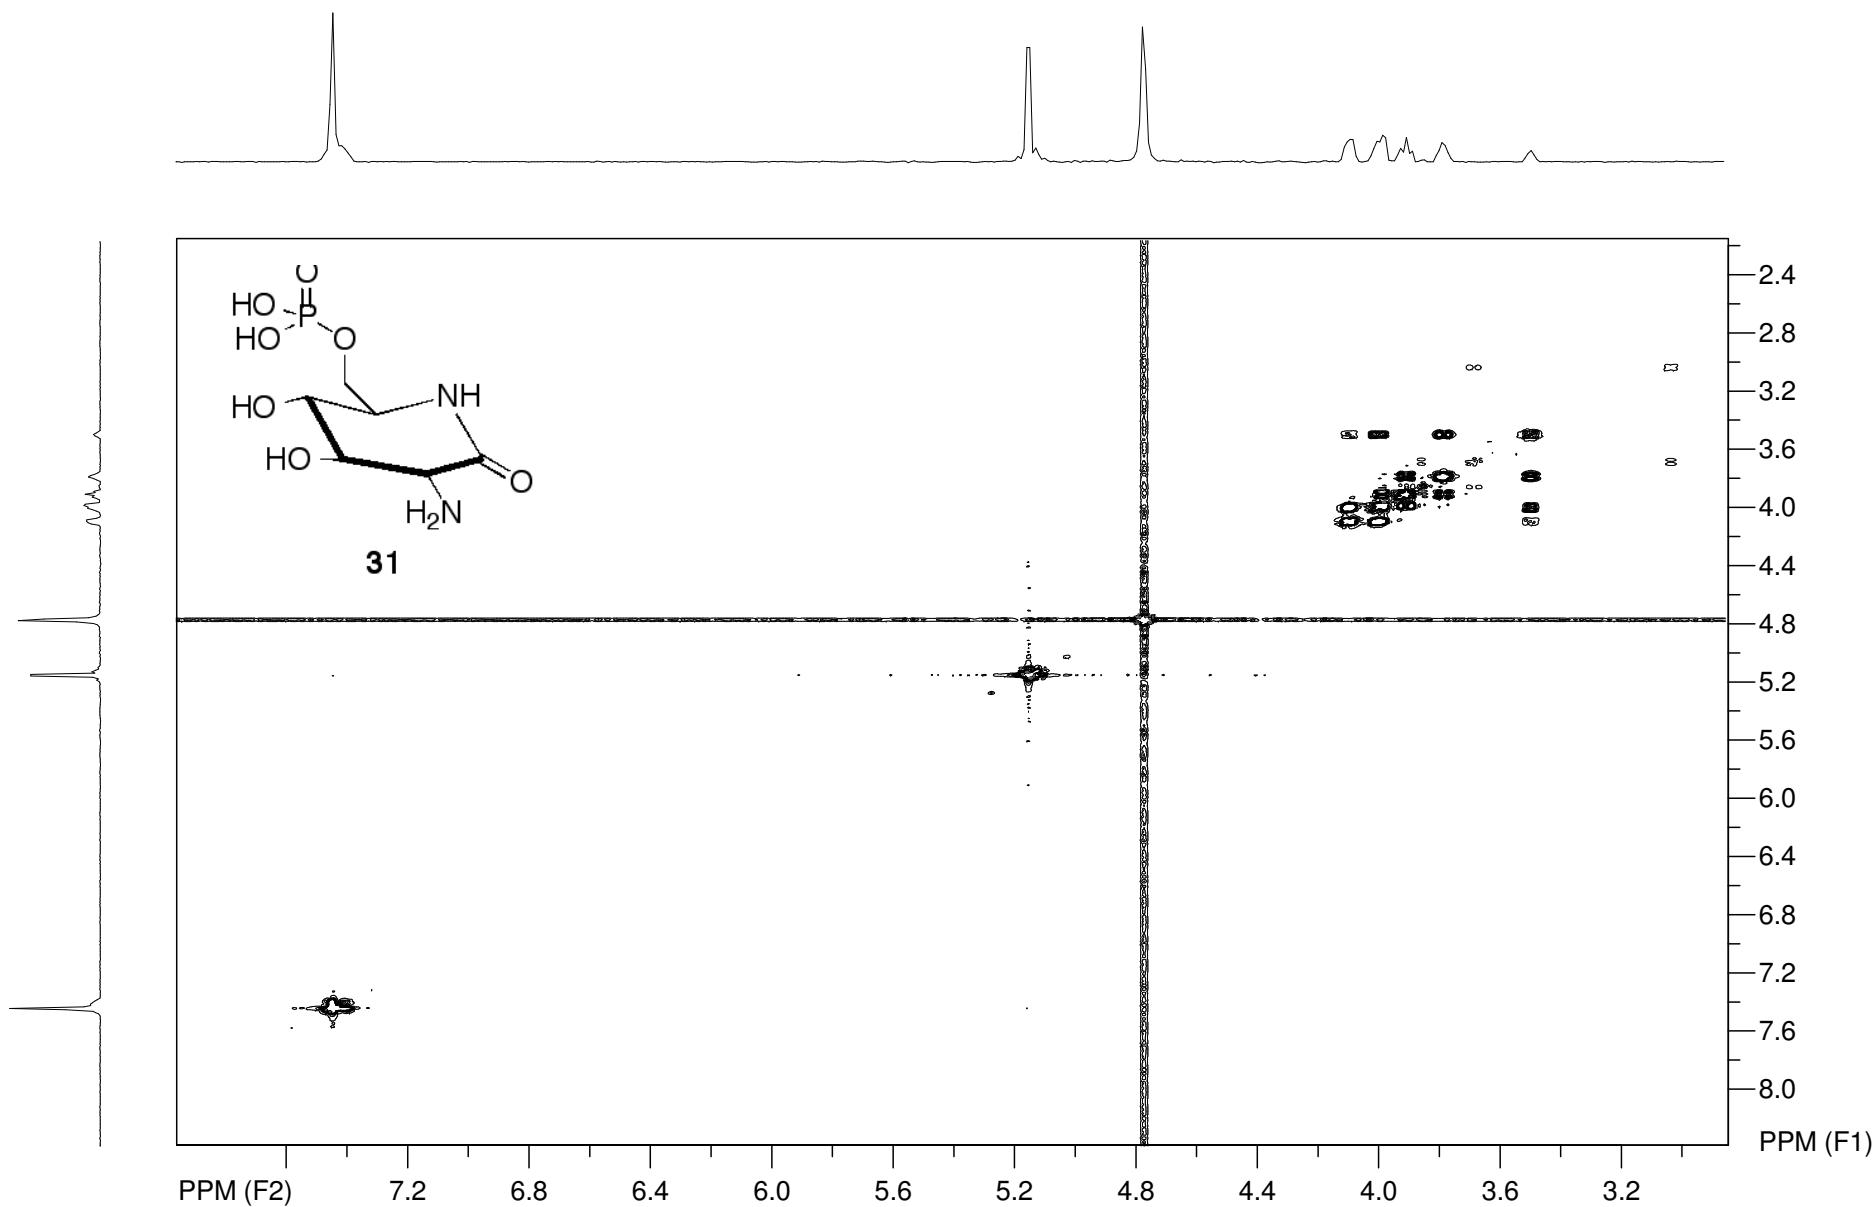

file: C:\Users\Jeff\Documents\NMR Folder\NMR Data\L6PNZ\_D2O\_COSY\1\ser exp: <cosygpqf>  
 transmitter freq.: 600.552832 MHz  
 time domain size: 2048 by 1024 points  
 width (F2): 6009.59 Hz = 10.006806 ppm = 2.934368 Hz/pt  
 number of scans: 2

F2: freq. of 0 ppm: 600.549962 MHz  
 processed size: 1024 complex points  
 window function: Sine  
 shift: 0.0 degrees  
 Hz/cm: 149.805 ppm/cm: 0.24944

F1: freq. of 0 ppm: 600.549962 MHz  
 processed size: 1024 complex points  
 window function: Sine  
 shift: 0.0 degrees  
 Hz/cm: 311.996 ppm/cm: 0.51951



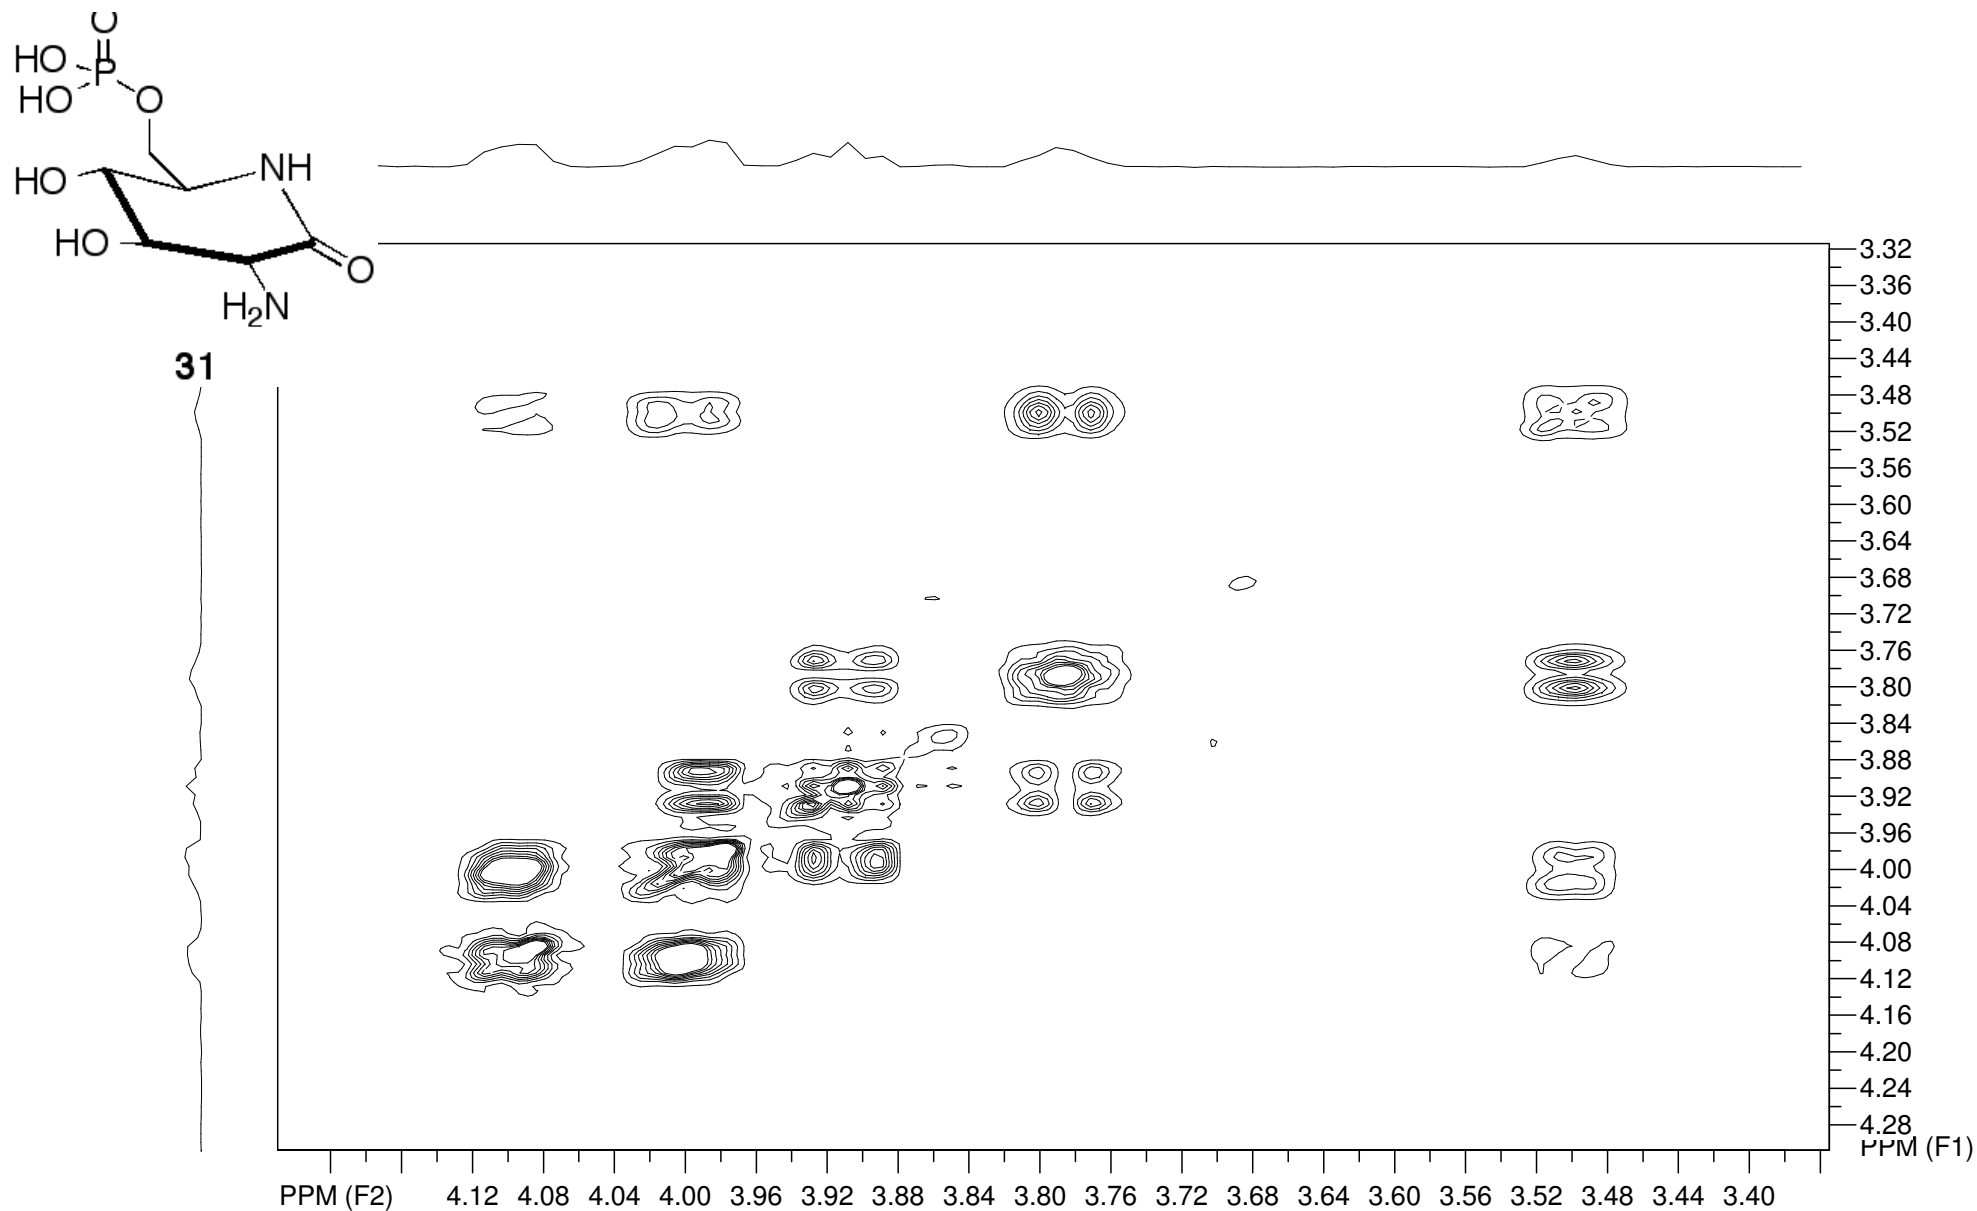

file: C:\Users\Jeff\Documents\NMR Folder\NMR Data\L6PNZ\_D2O\_COSY\1\ser exp: <cosygpqf>  
 transmitter freq.: 600.552832 MHz  
 time domain size: 2048 by 1024 points  
 width (F2): 6009.59 Hz = 10.006806 ppm = 2.934368 Hz/pt  
 number of scans: 2

F2: freq. of 0 ppm: 600.549962 MHz  
 processed size: 1024 complex points  
 window function: Sine  
 shift: 0.0 degrees  
 Hz/cm: 25.633 ppm/cm: 0.04268

F1: freq. of 0 ppm: 600.549962 MHz  
 processed size: 1024 complex points  
 window function: Sine  
 shift: 0.0 degrees  
 Hz/cm: 49.748 ppm/cm: 0.08284

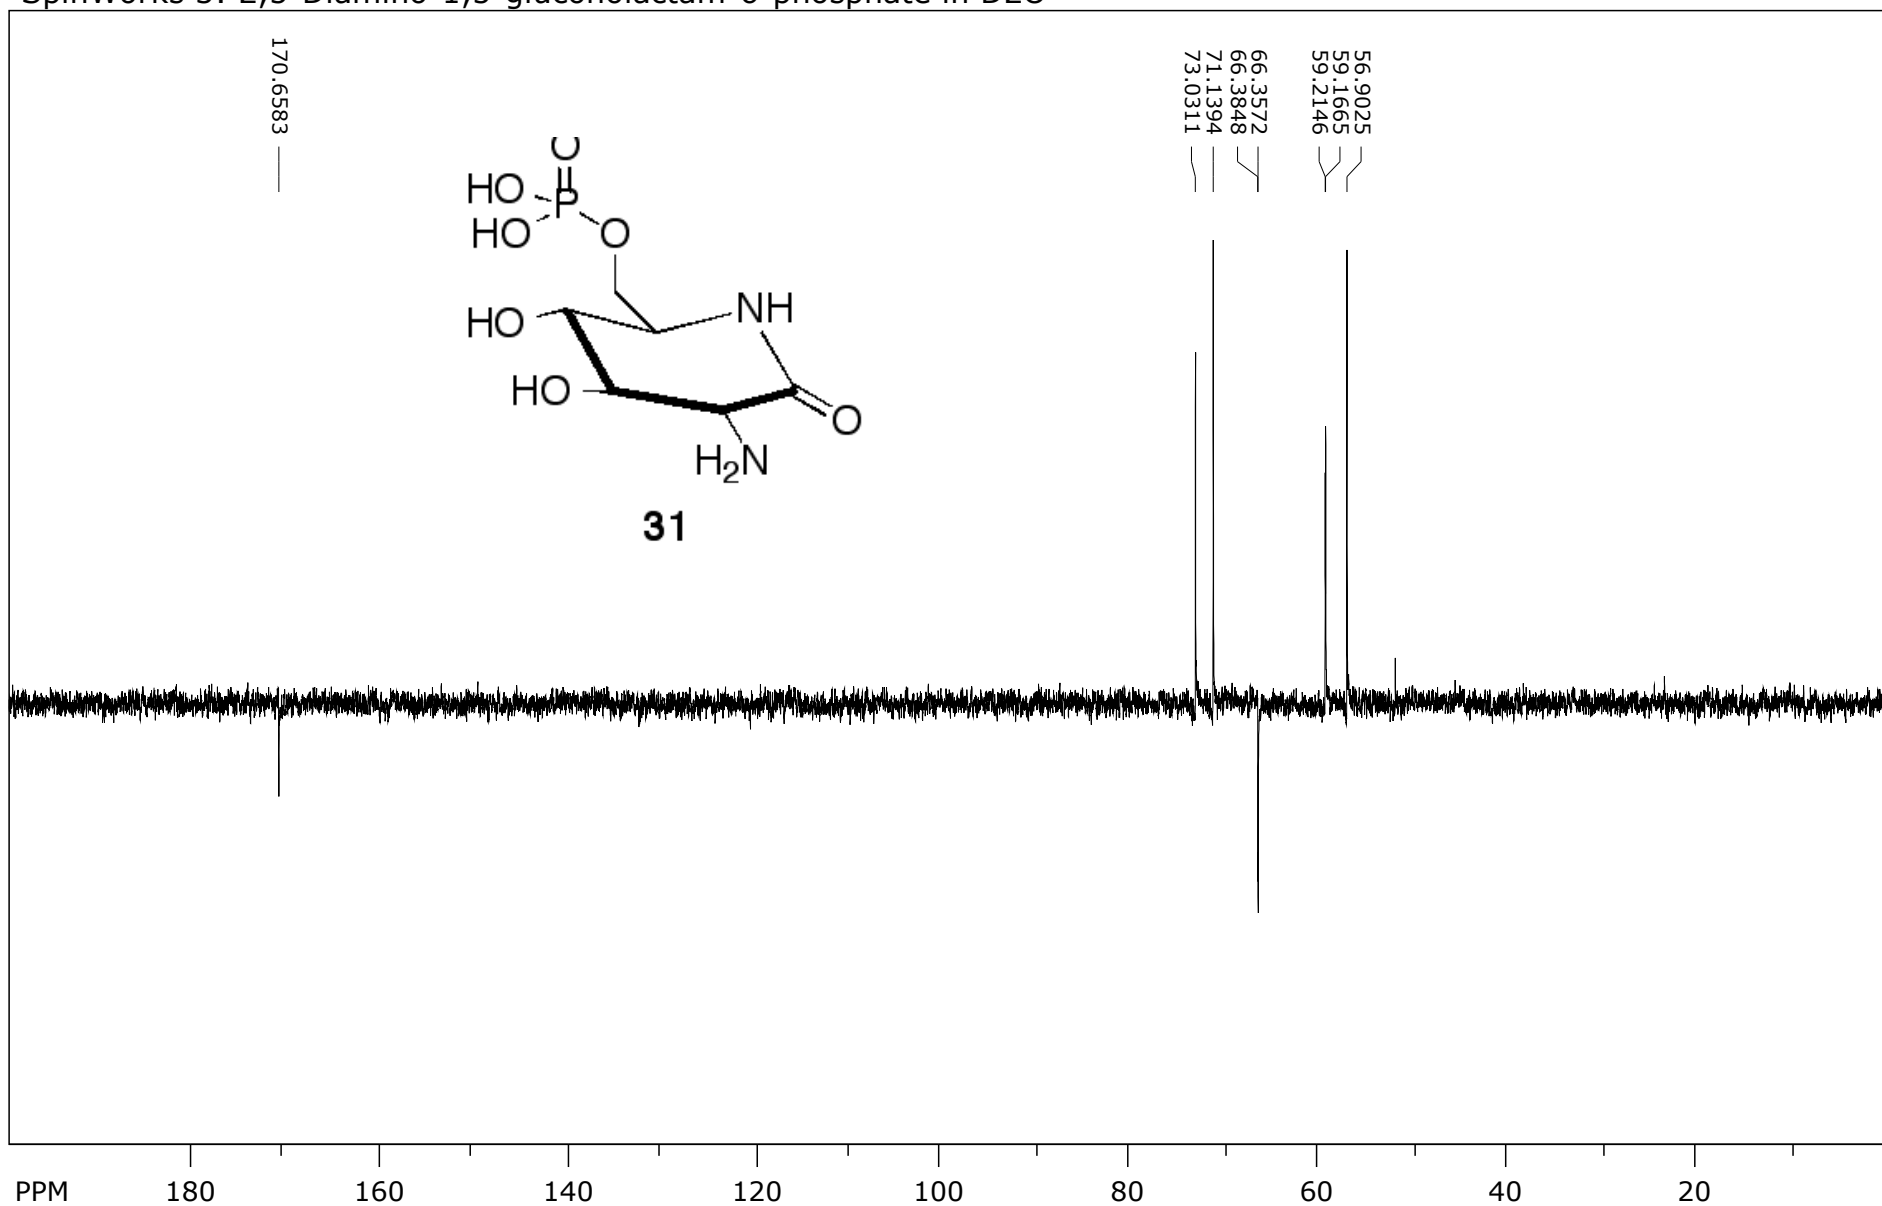

file: ...NMR Data\L6P\_DEPTQ\L6P\_DEPTQ\1\fid expt: <deptqgpp>  
transmitter freq.: 151.023522 MHz  
time domain size: 65536 points  
width: 36057.69 Hz = 238.7555 ppm = 0.550197 Hz/pt  
number of scans: 25600

freq. of 0 ppm: 151.008006 MHz  
processed size: 32768 complex points  
LB: 3.000 GF: 0.0000  
Hz/cm: 1210.786 ppm/cm: 8.01720

|               |                      |             |                      |                 |              |                        |                      |
|---------------|----------------------|-------------|----------------------|-----------------|--------------|------------------------|----------------------|
| Sample Name   | Jeff 42              | Position    | Vial 42              | Instrument Name | Instrument 1 | User Name              | DYL                  |
| Inj Vol       | 1                    | InjPosition |                      | SampleType      | Unknown      | IRM Calibration Status | Success              |
| Data Filename | Direct_Vial 42_Jeff. | ACQ Method  | Direct_small mol_Jef | Comment         |              | Acquired Time          | 8/17/2012 1:51:49 PM |

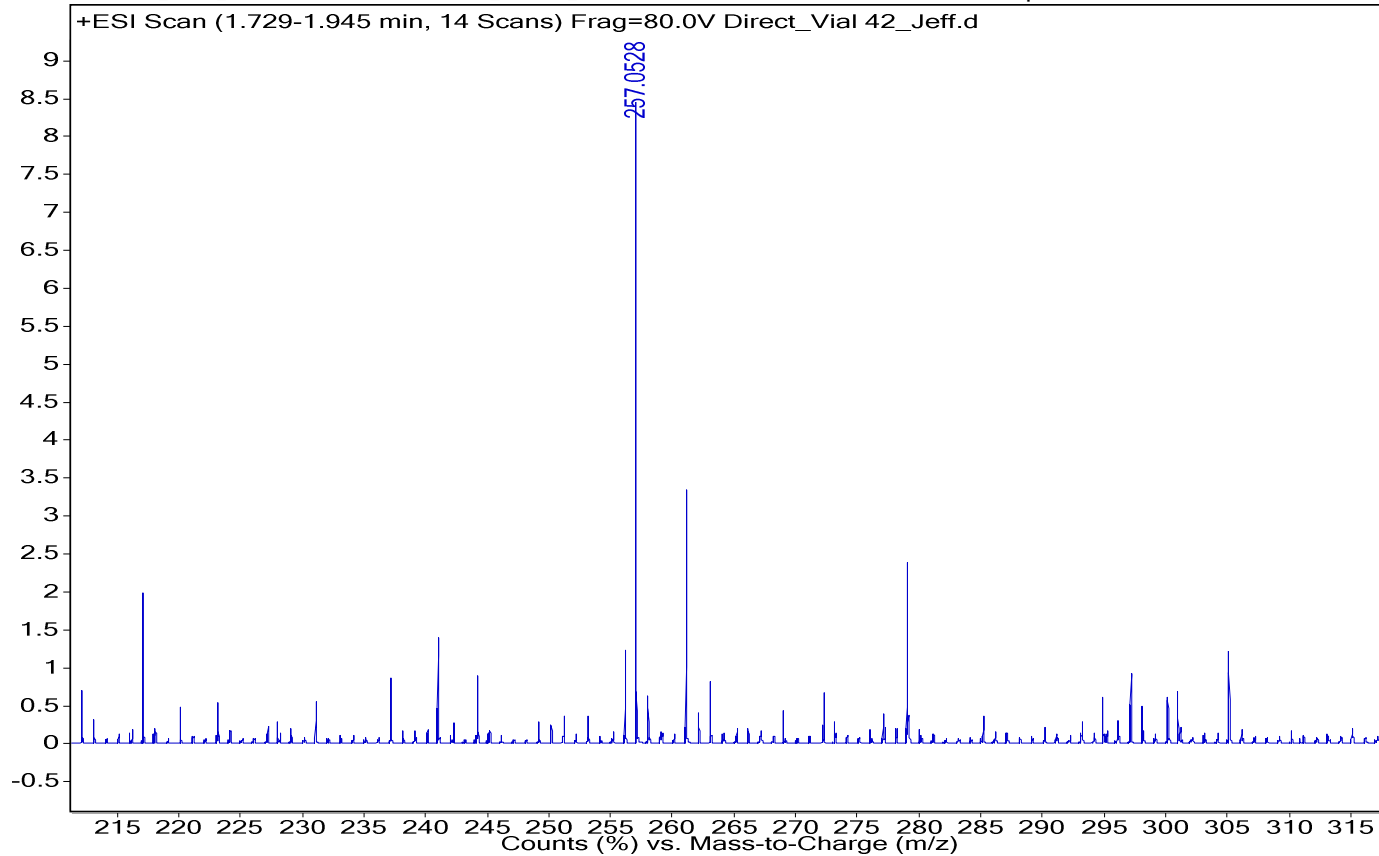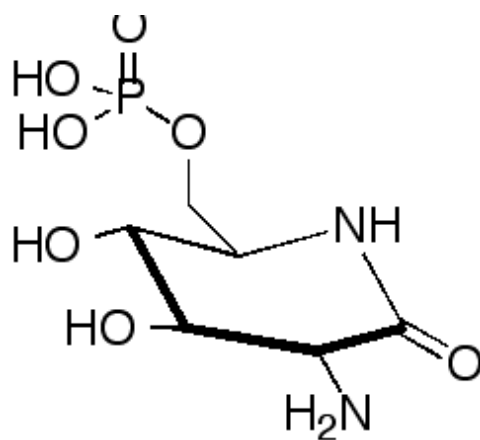**31**

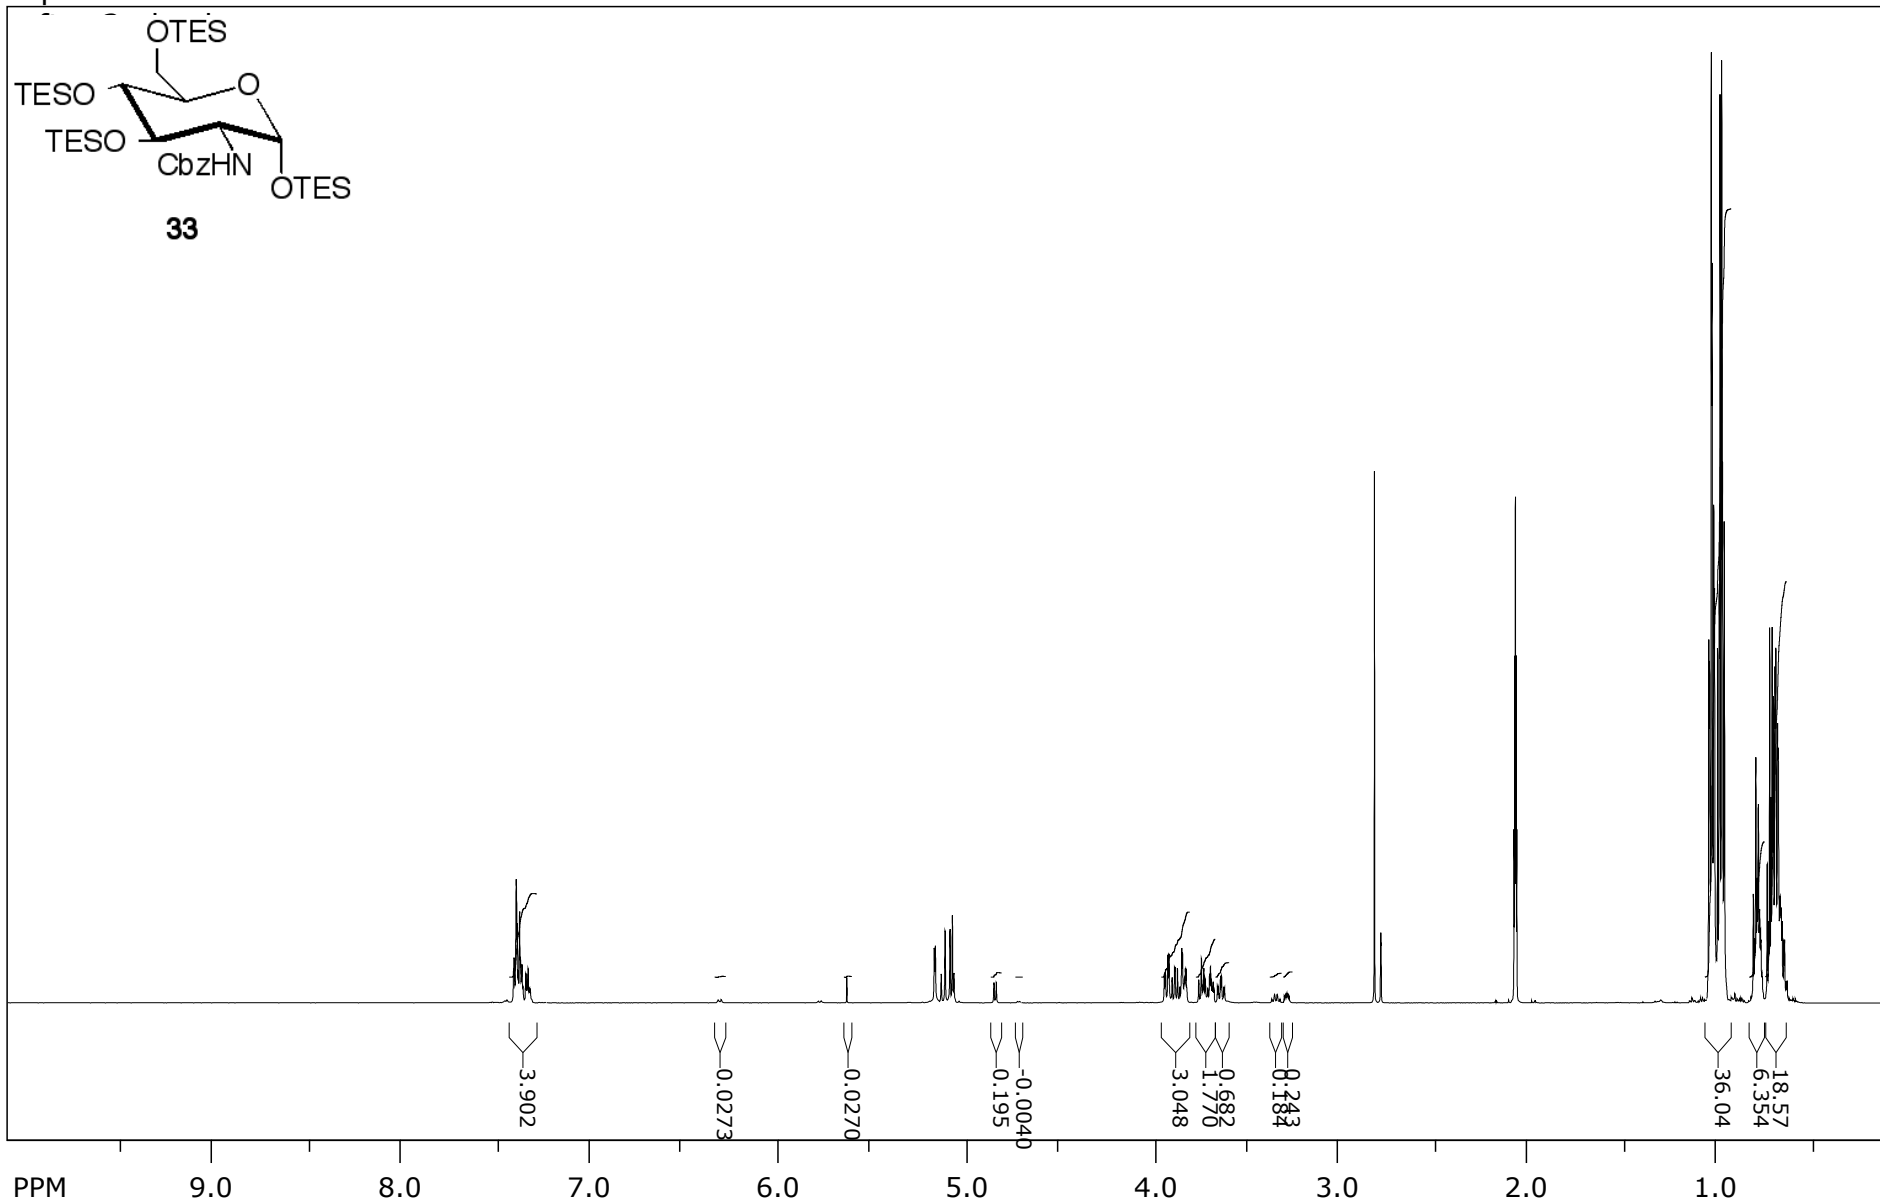

file: ... process\TES4GlcNZ\_d6acetone\1\fid expt: <zgpr>  
transmitter freq.: 600.553538 MHz  
time domain size: 65536 points  
width: 8417.51 Hz = 14.0162 ppm = 0.128441 Hz/pt  
number of scans: 32

freq. of 0 ppm: 600.550010 MHz  
processed size: 262144 complex points  
LB: 0.000 GF: 0.0000  
Hz/cm: 241.440 ppm/cm: 0.40203

after 2nd column

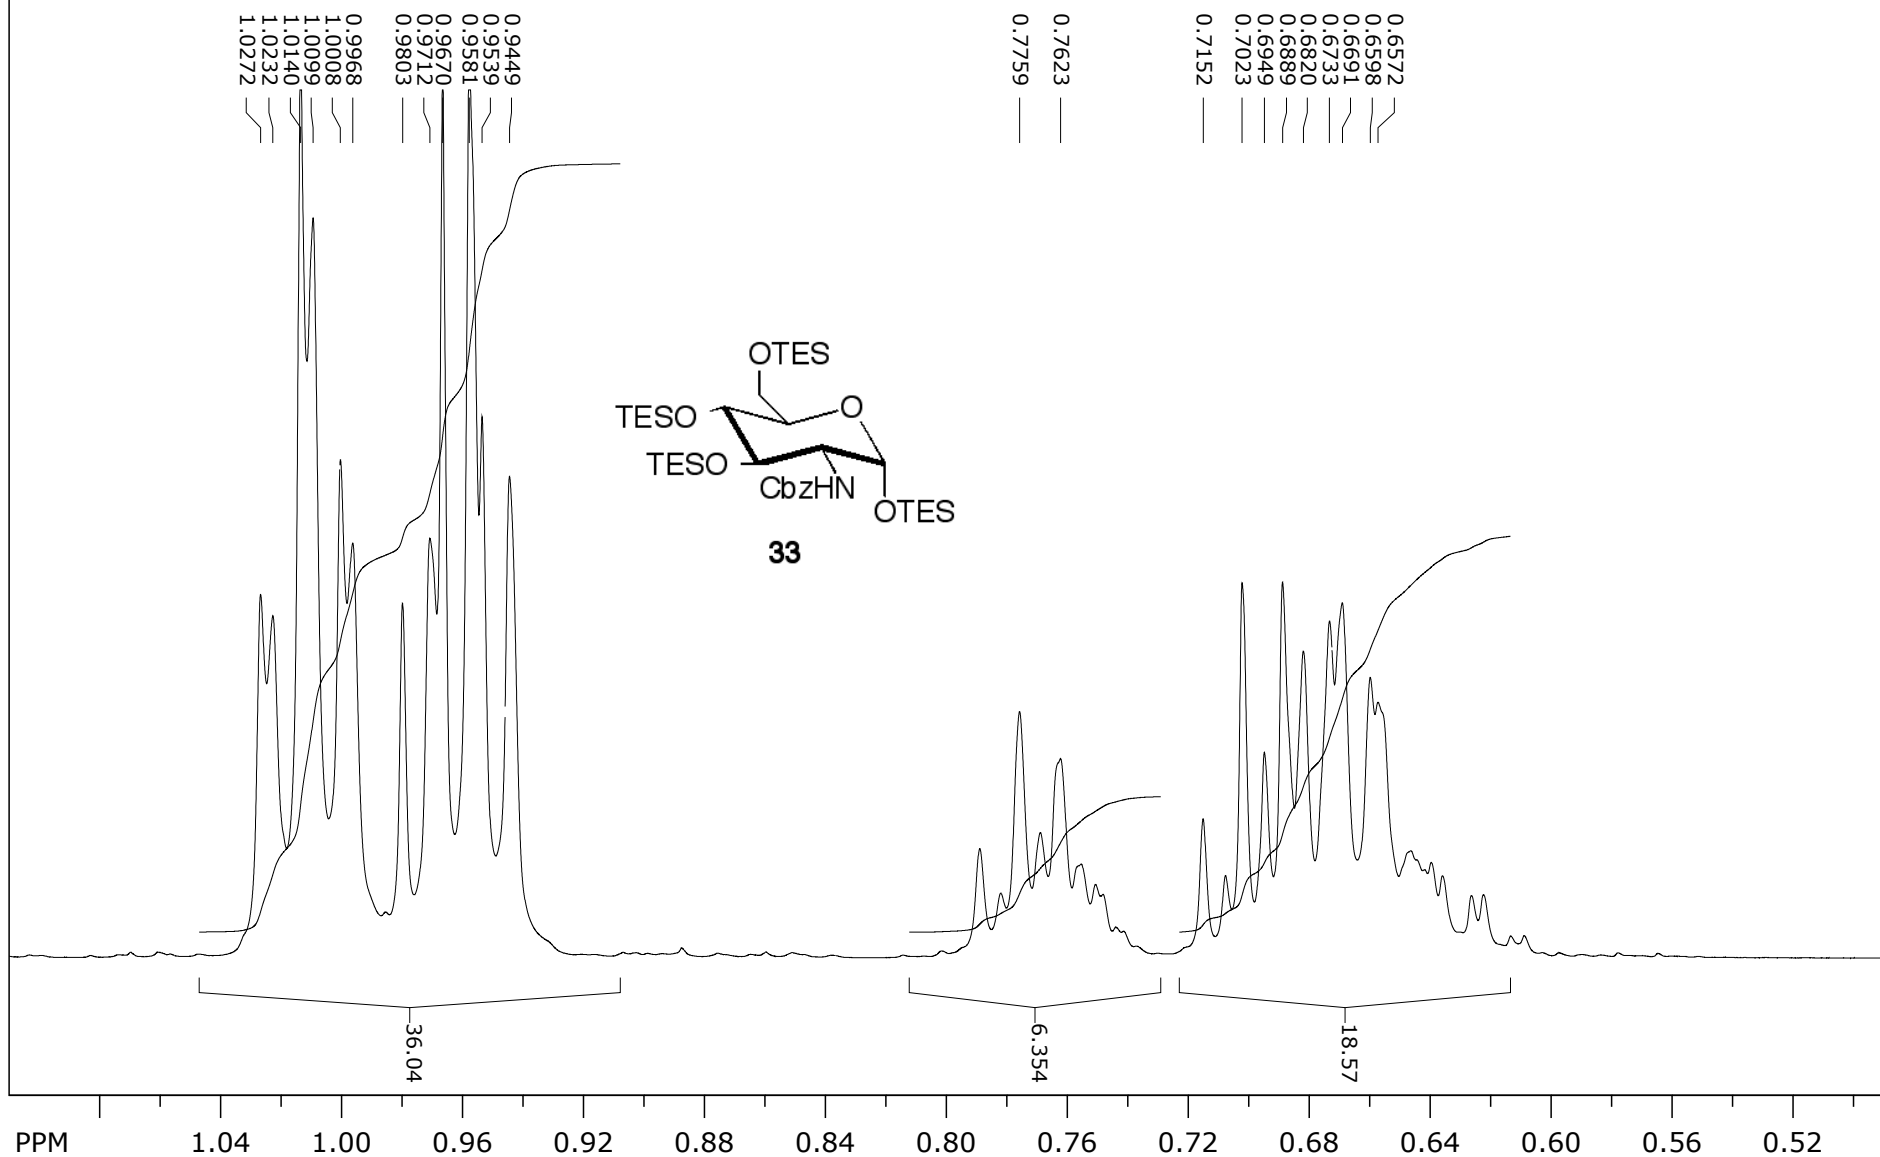

file: ... process\TES4GlcNZ\_d6acetone\1\fid expt: <zgpr>  
 transmitter freq.: 600.553538 MHz  
 time domain size: 65536 points  
 width: 8417.51 Hz = 14.0162 ppm = 0.128441 Hz/pt  
 number of scans: 32

freq. of 0 ppm: 600.550010 MHz  
 processed size: 262144 complex points  
 LB: 0.000 GF: 0.0000  
 Hz/cm: 14.971 ppm/cm: 0.02493

after 2nd column

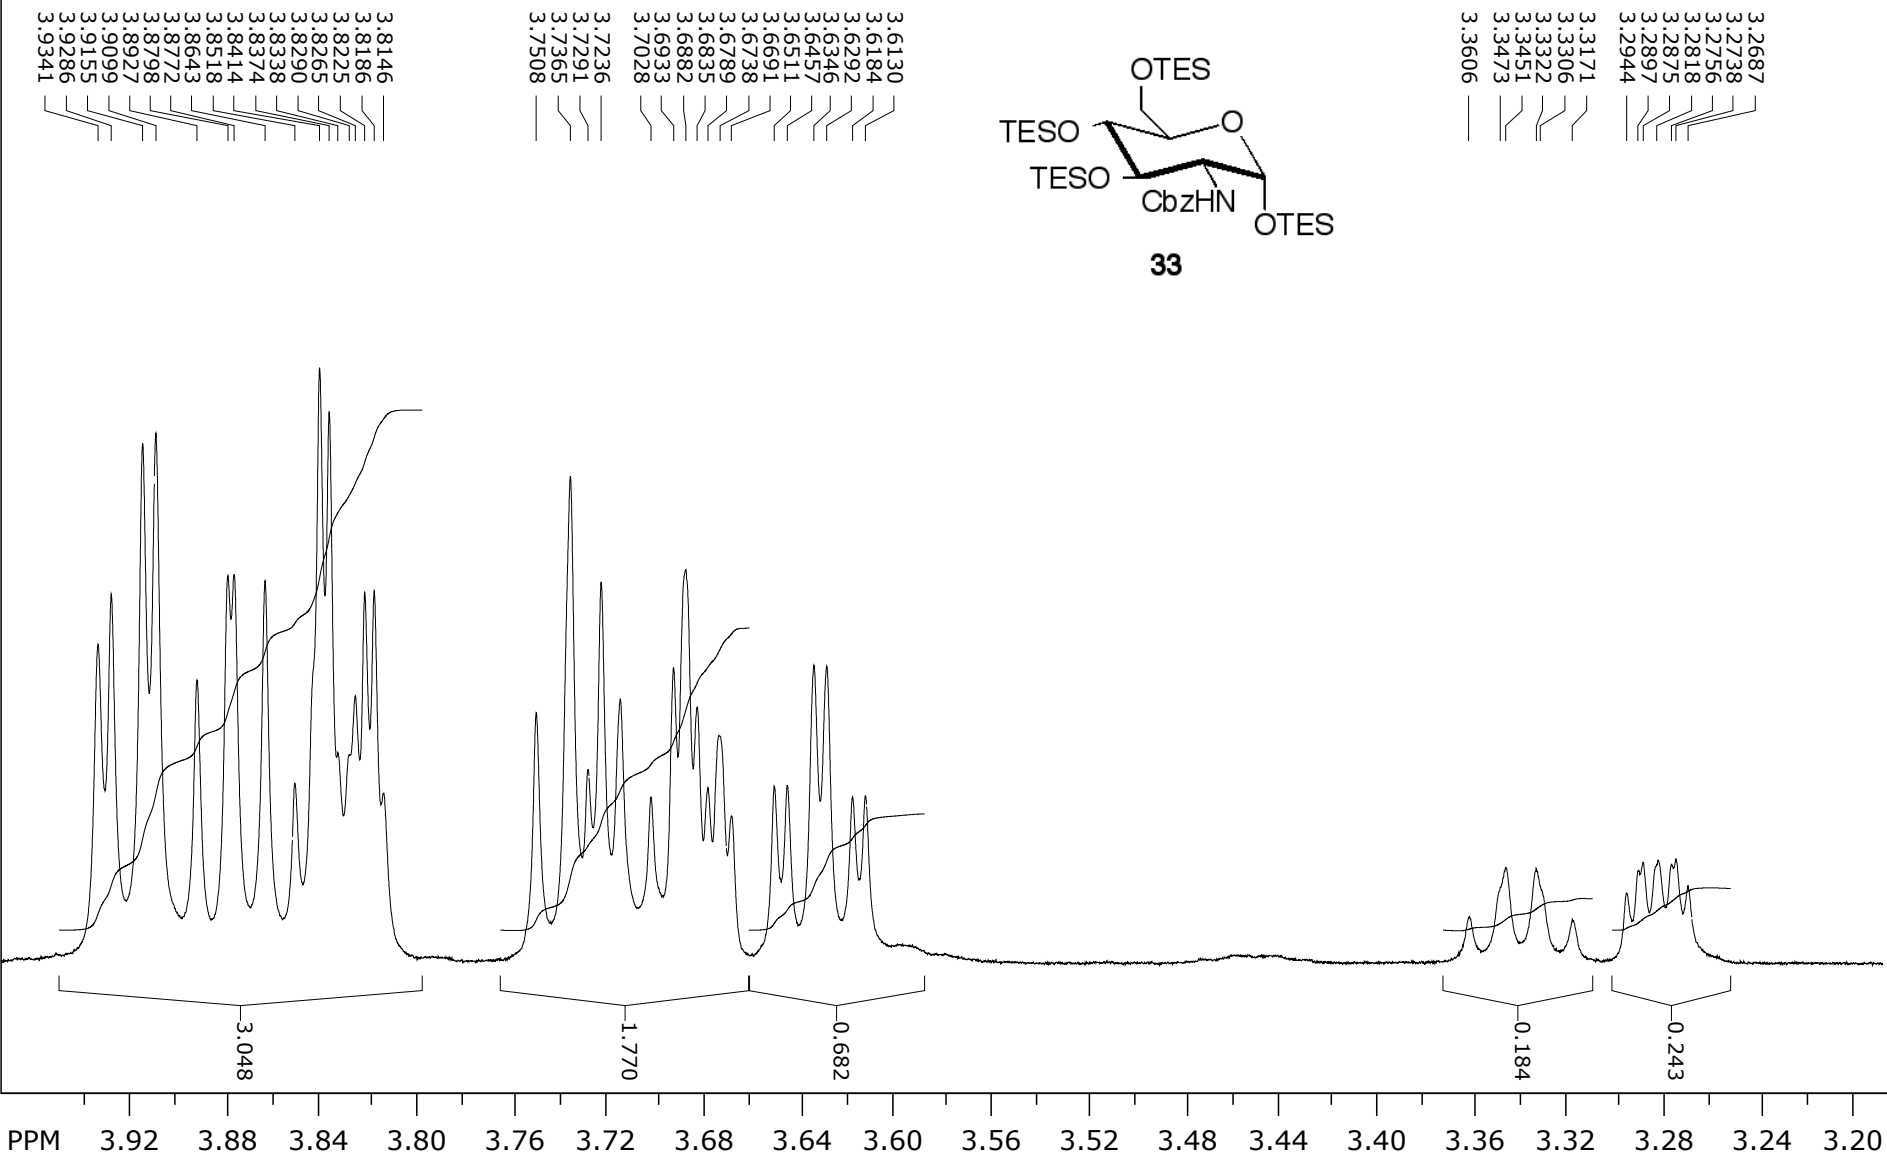

file: ... process\TES4GlcNZ\_d6acetone\1\fid expt: <zgpr>  
 transmitter freq.: 600.553538 MHz  
 time domain size: 65536 points  
 width: 8417.51 Hz = 14.0162 ppm = 0.128441 Hz/pt  
 number of scans: 32

freq. of 0 ppm: 600.550010 MHz  
 processed size: 262144 complex points  
 LB: 0.000 GF: 0.0000  
 Hz/cm: 18.922 ppm/cm: 0.03151

after 2nd column

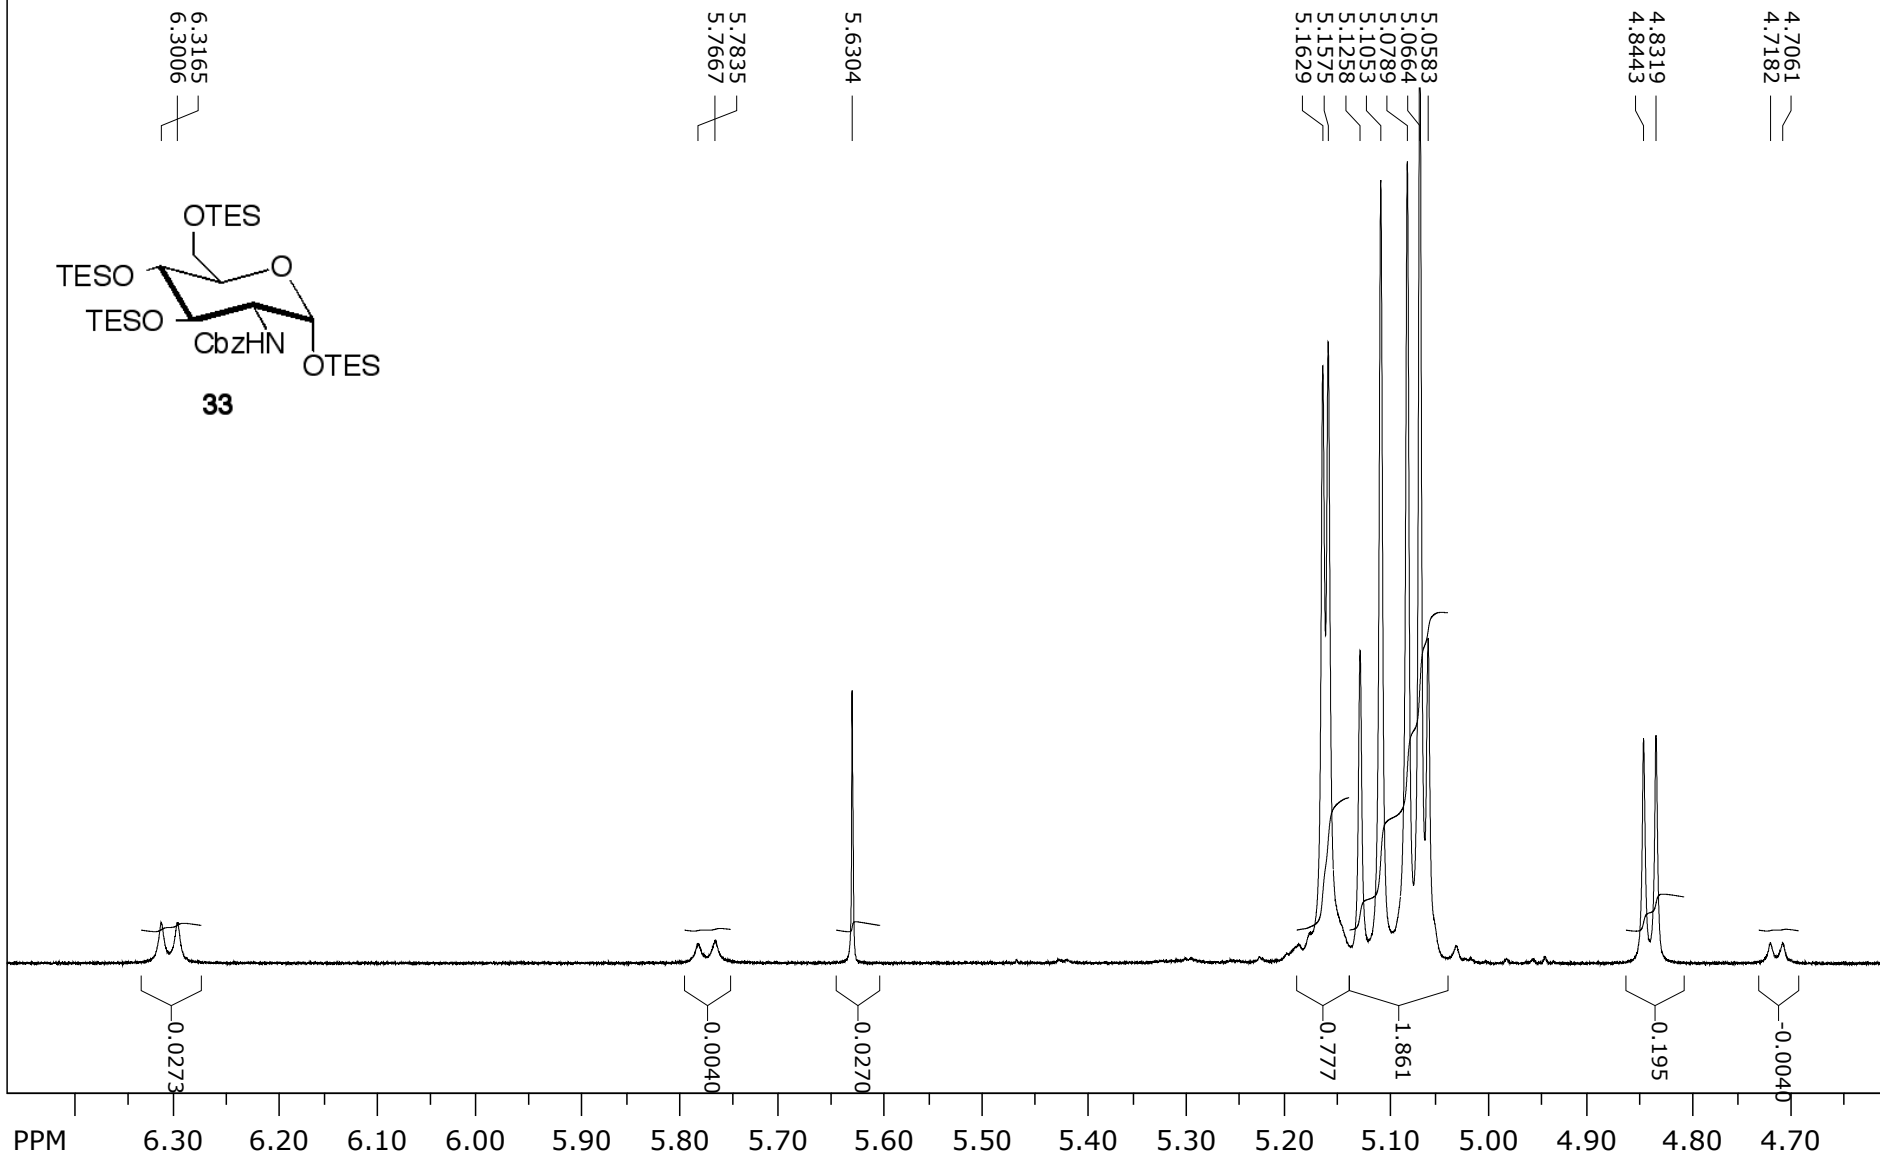

file: ... process\TES4GlcNZ\_d6acetone\1\fid expt: <zgpr>  
transmitter freq.: 600.553538 MHz  
time domain size: 65536 points  
width: 8417.51 Hz = 14.0162 ppm = 0.128441 Hz/pt  
number of scans: 32

freq. of 0 ppm: 600.550010 MHz  
processed size: 262144 complex points  
LB: 0.000 GF: 0.0000  
Hz/cm: 44.906 ppm/cm: 0.07477

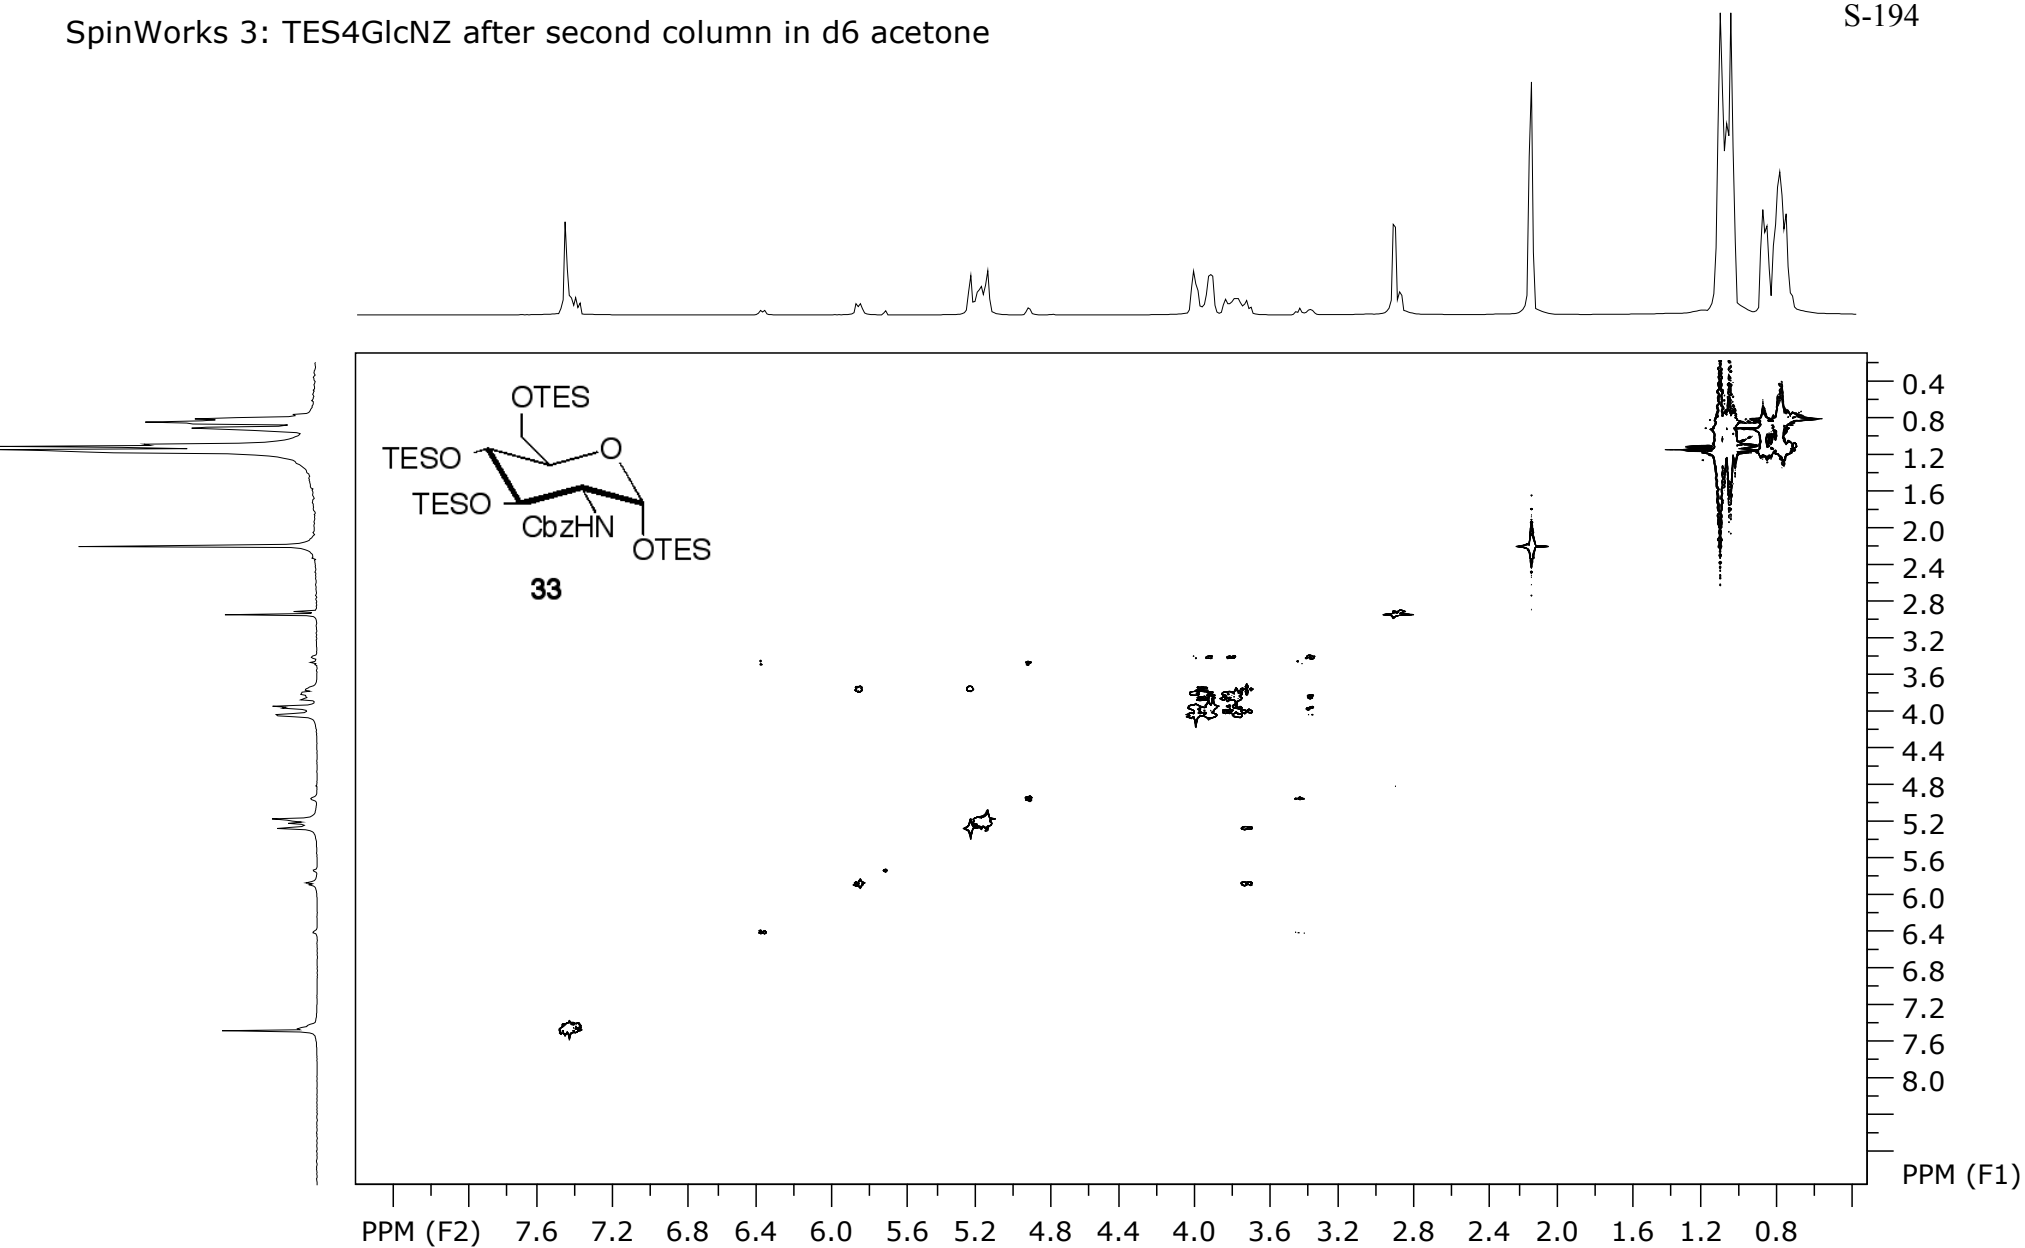

file: ...ocess\TES4GlcNZd6acetoneCOSY\1\ser  
expt: <cosygpqf>  
transmitter freq: 600.552832 MHz  
time domain size: 2048 by 2048 points  
width (F2): 7211.54 Hz = 12.0082 ppm = 3.5213 Hz/pt  
number of scans: 2

F2: freq. of 0 ppm: 600.5499623 MHz  
processed size: 1024 complex points  
window function: Sine  
shift: 0.0 degrees  
Hz/cm: 249.443 ppm/cm: 0.41536

F1: freq. of 0 ppm: 600.5499623 MHz  
processed size: 1024 complex points  
window function: Sine  
shift: 0.0 degrees  
Hz/cm: 495.237 ppm/cm: 0.82463



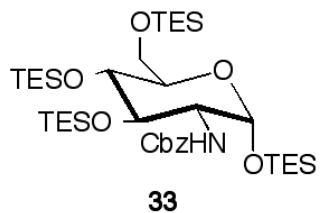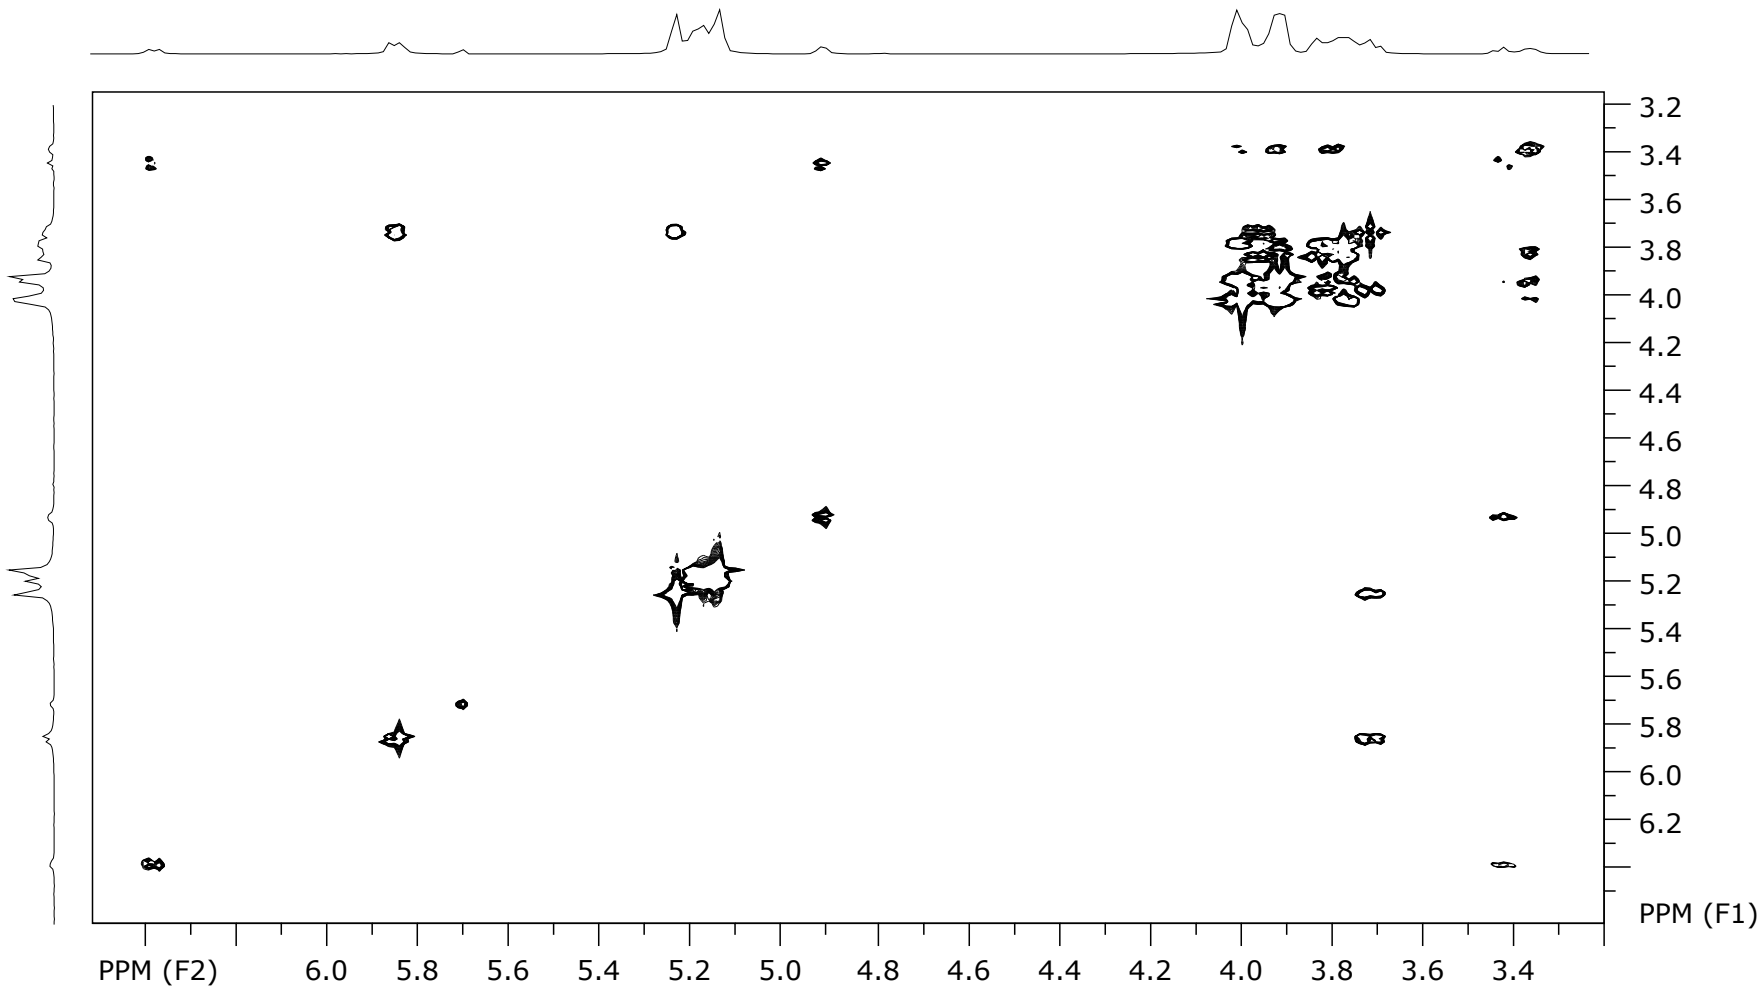

file: ...ocess\TES4GlcNZd6acetoneCOSY\1\ser  
 expt: <cosygpqf>  
 transmitter freq: 600.552832 MHz  
 time domain size: 2048 by 2048 points  
 width (F2): 7211.54 Hz = 12.0082 ppm = 3.5213 Hz/pt  
 number of scans: 2

F2: freq. of 0 ppm: 600.5499623 MHz  
 processed size: 1024 complex points  
 window function: Sine  
 shift: 0.0 degrees  
 Hz/cm: 99.306 ppm/cm: 0.16536

F1: freq. of 0 ppm: 600.5499623 MHz  
 processed size: 1024 complex points  
 window function: Sine  
 shift: 0.0 degrees  
 Hz/cm: 190.359 ppm/cm: 0.31697

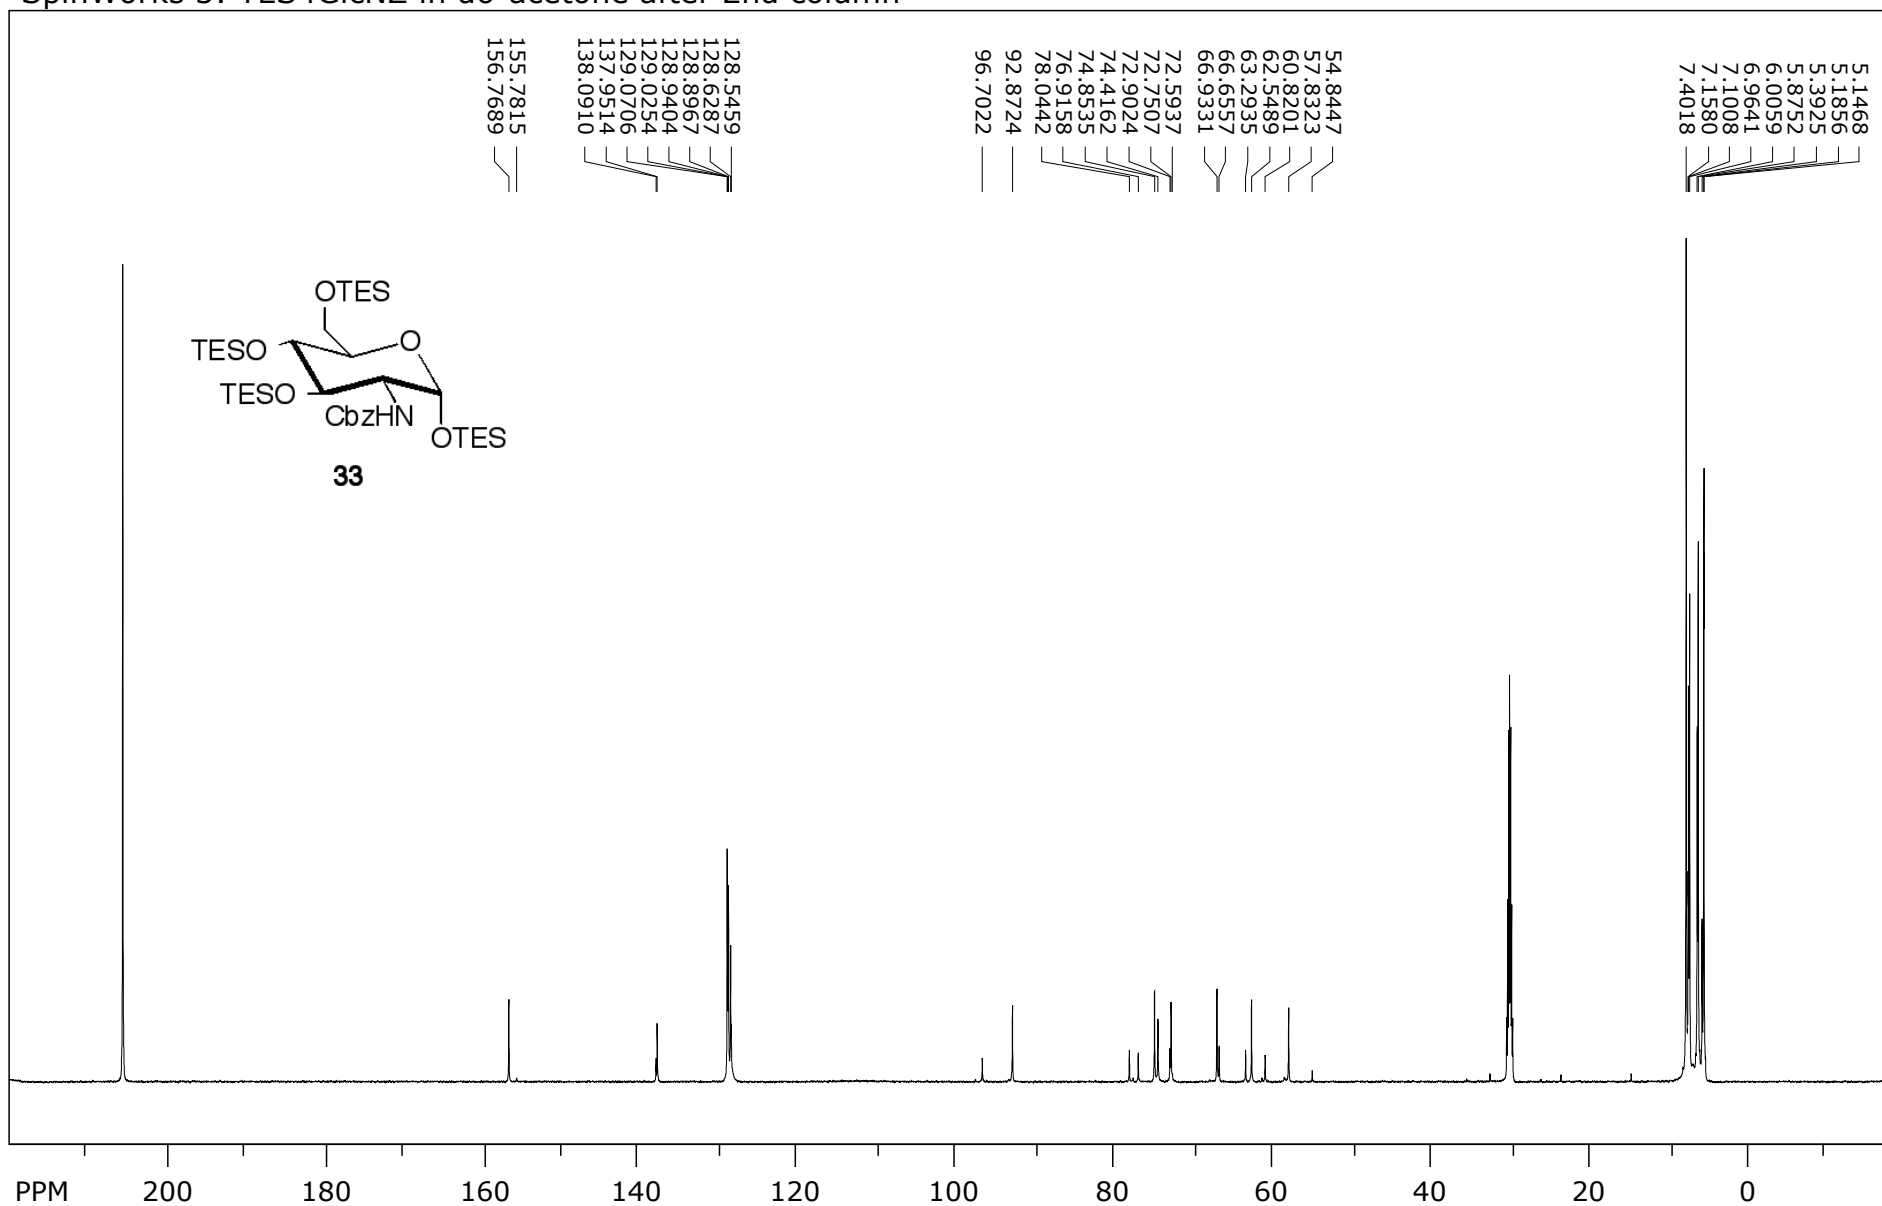

file: ...process\TES4GlcNZ\_d6Acet\_C13\1\fid expt: <zgpg30>  
transmitter freq.: 151.023519 MHz  
time domain size: 65536 points  
width: 36057.69 Hz = 238.7555 ppm = 0.550197 Hz/pt  
number of scans: 4000

freq. of 0 ppm: 151.008298 MHz  
processed size: 32768 complex points  
LB: 5.000 GF: 0.0000  
Hz/cm: 1442.308 ppm/cm: 9.55022

|               |                     |             |                      |                 |              |                        |                      |
|---------------|---------------------|-------------|----------------------|-----------------|--------------|------------------------|----------------------|
| Sample Name   | Jeff 21             | Position    | Vial 73              | Instrument Name | Instrument 1 | User Name              | DYL                  |
| Inj Vol       | 1                   | InjPosition |                      | SampleType      | Unknown      | IRM Calibration Status | Success              |
| Data Filename | Direct_no MeOH_Vial | ACQ Method  | Direct_small mol_Jef | Comment         |              | Acquired Time          | 8/21/2012 1:39:28 PM |

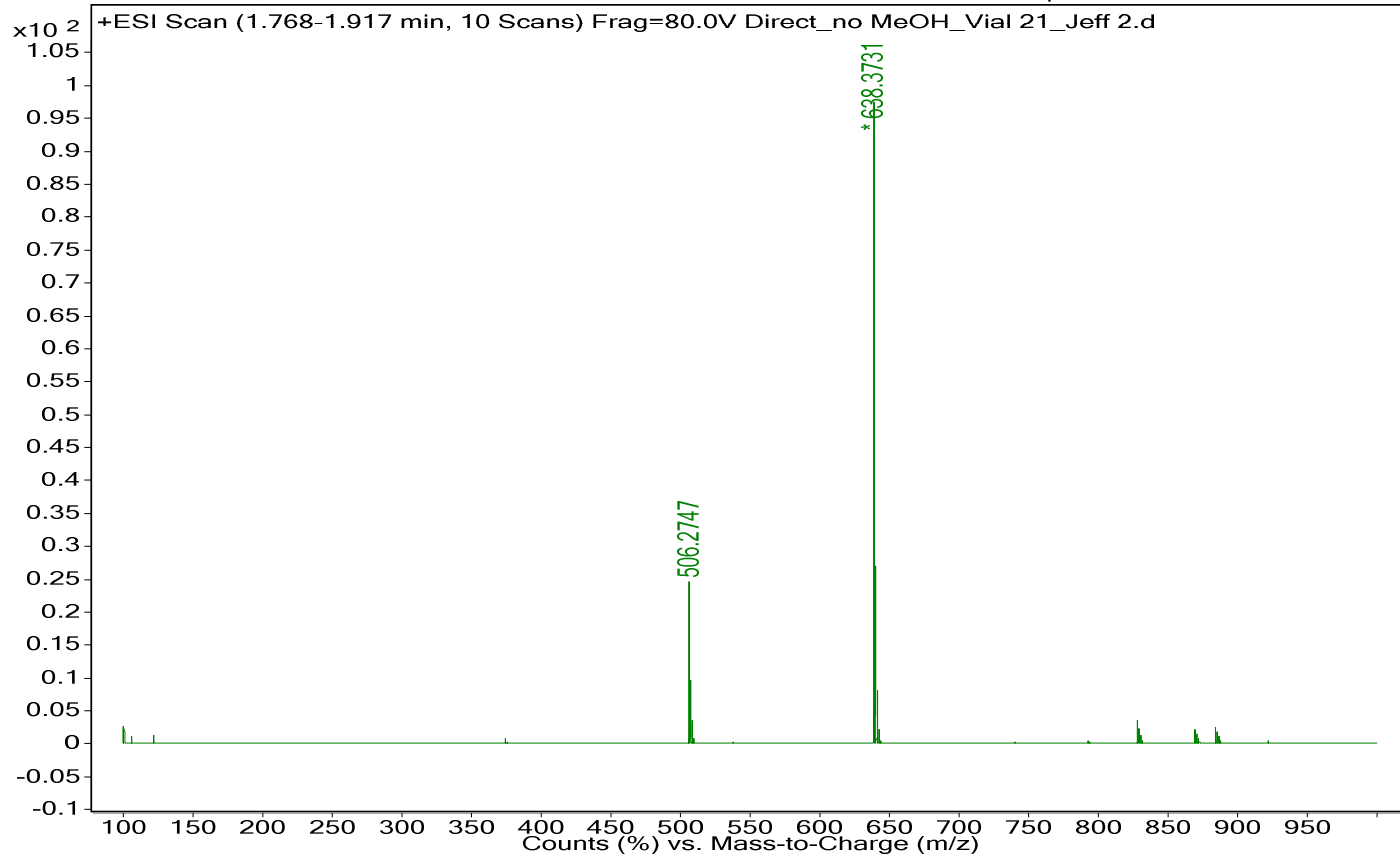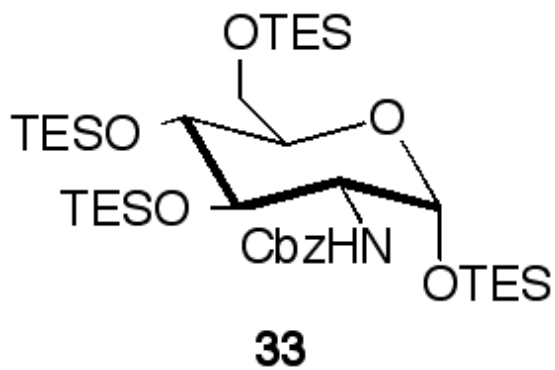

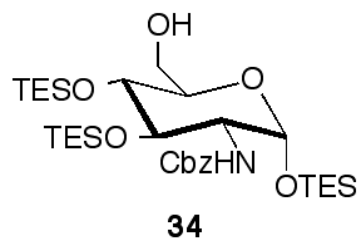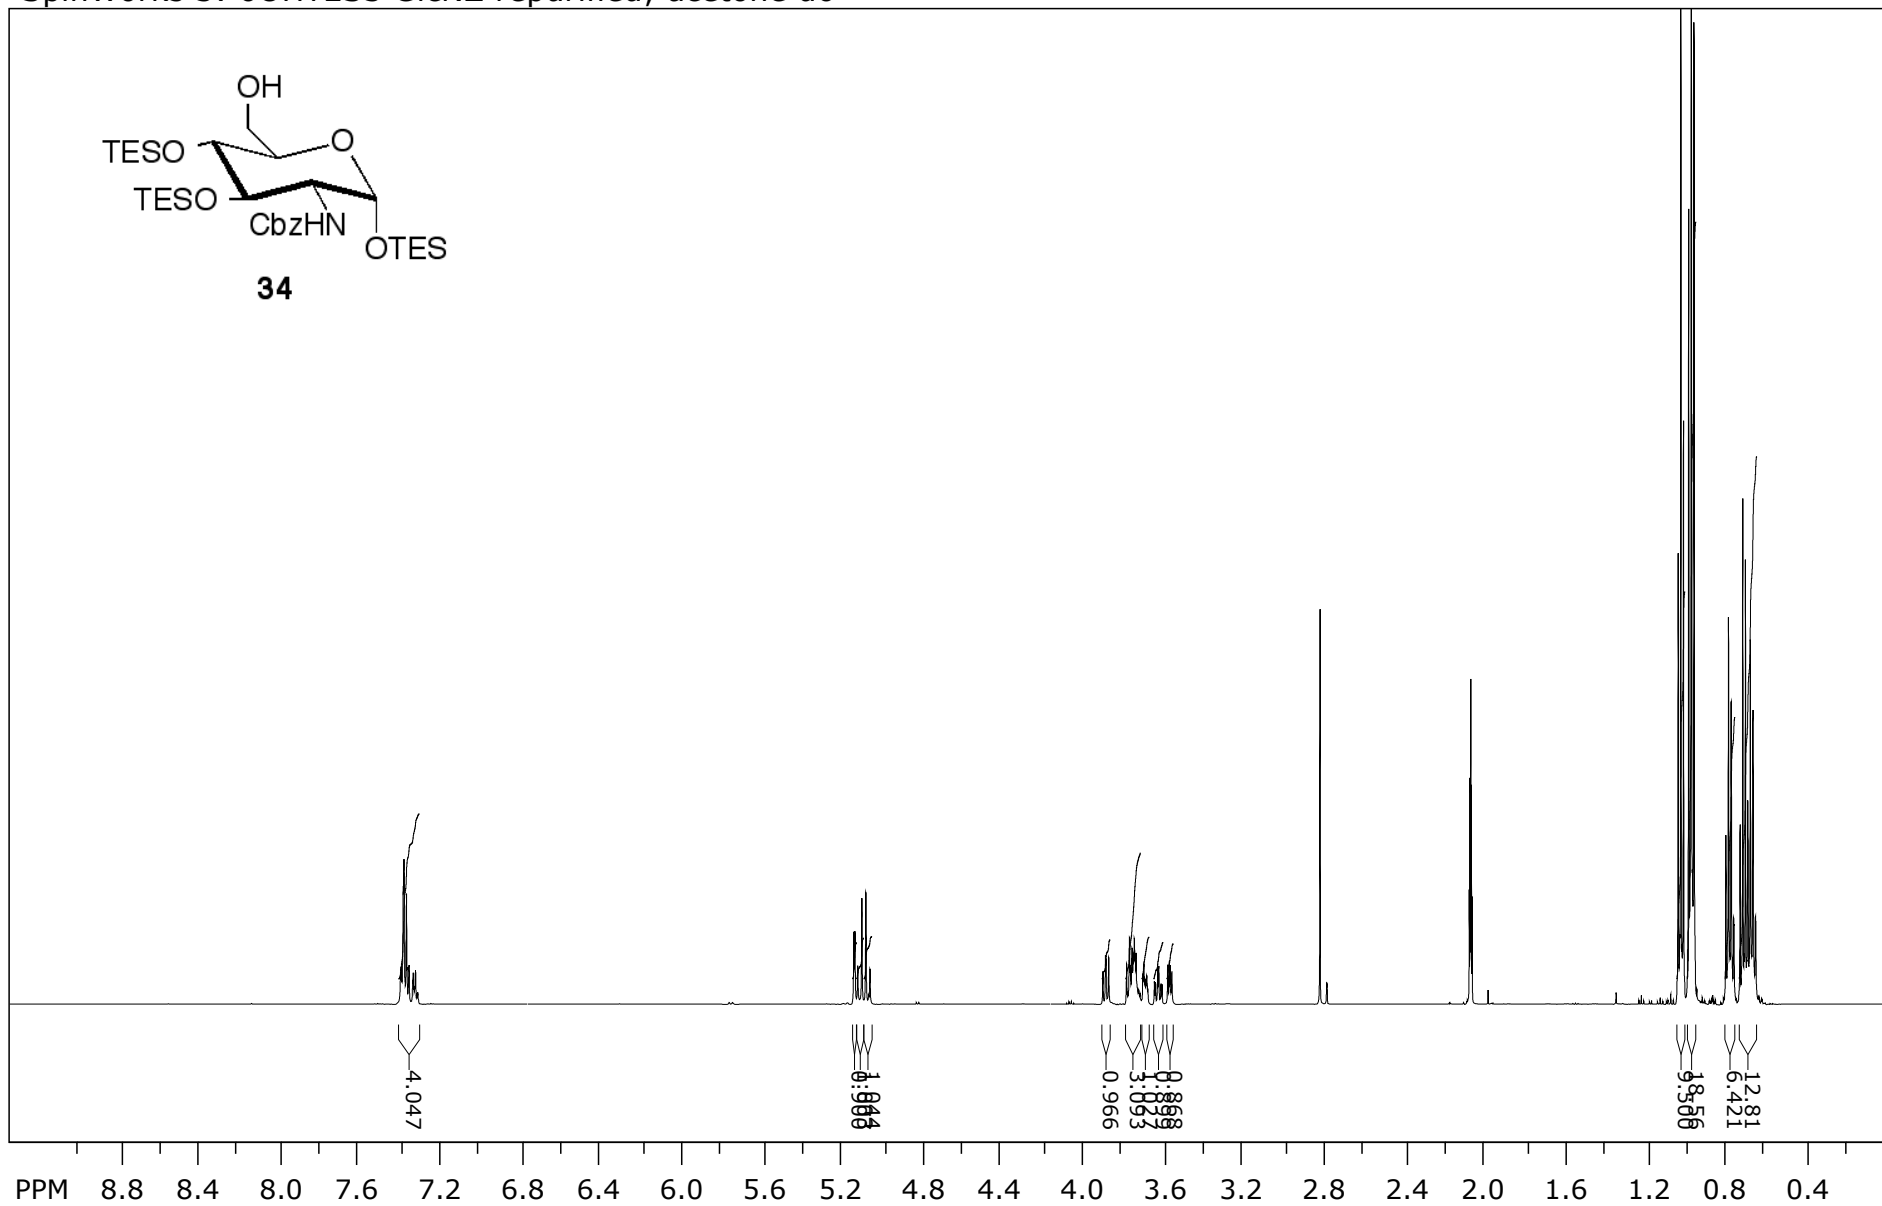

file: ... process\6OHTES3NZrepur\_acet\1\fid exp: <zgpr>  
transmitter freq.: 600.553538 MHz  
time domain size: 65536 points  
width: 7211.54 Hz = 12.0082 ppm = 0.110039 Hz/pt  
number of scans: 32

freq. of 0 ppm: 600.550010 MHz  
processed size: 262144 complex points  
LB: 0.000 GF: 0.0000  
Hz/cm: 226.004 ppm/cm: 0.37633

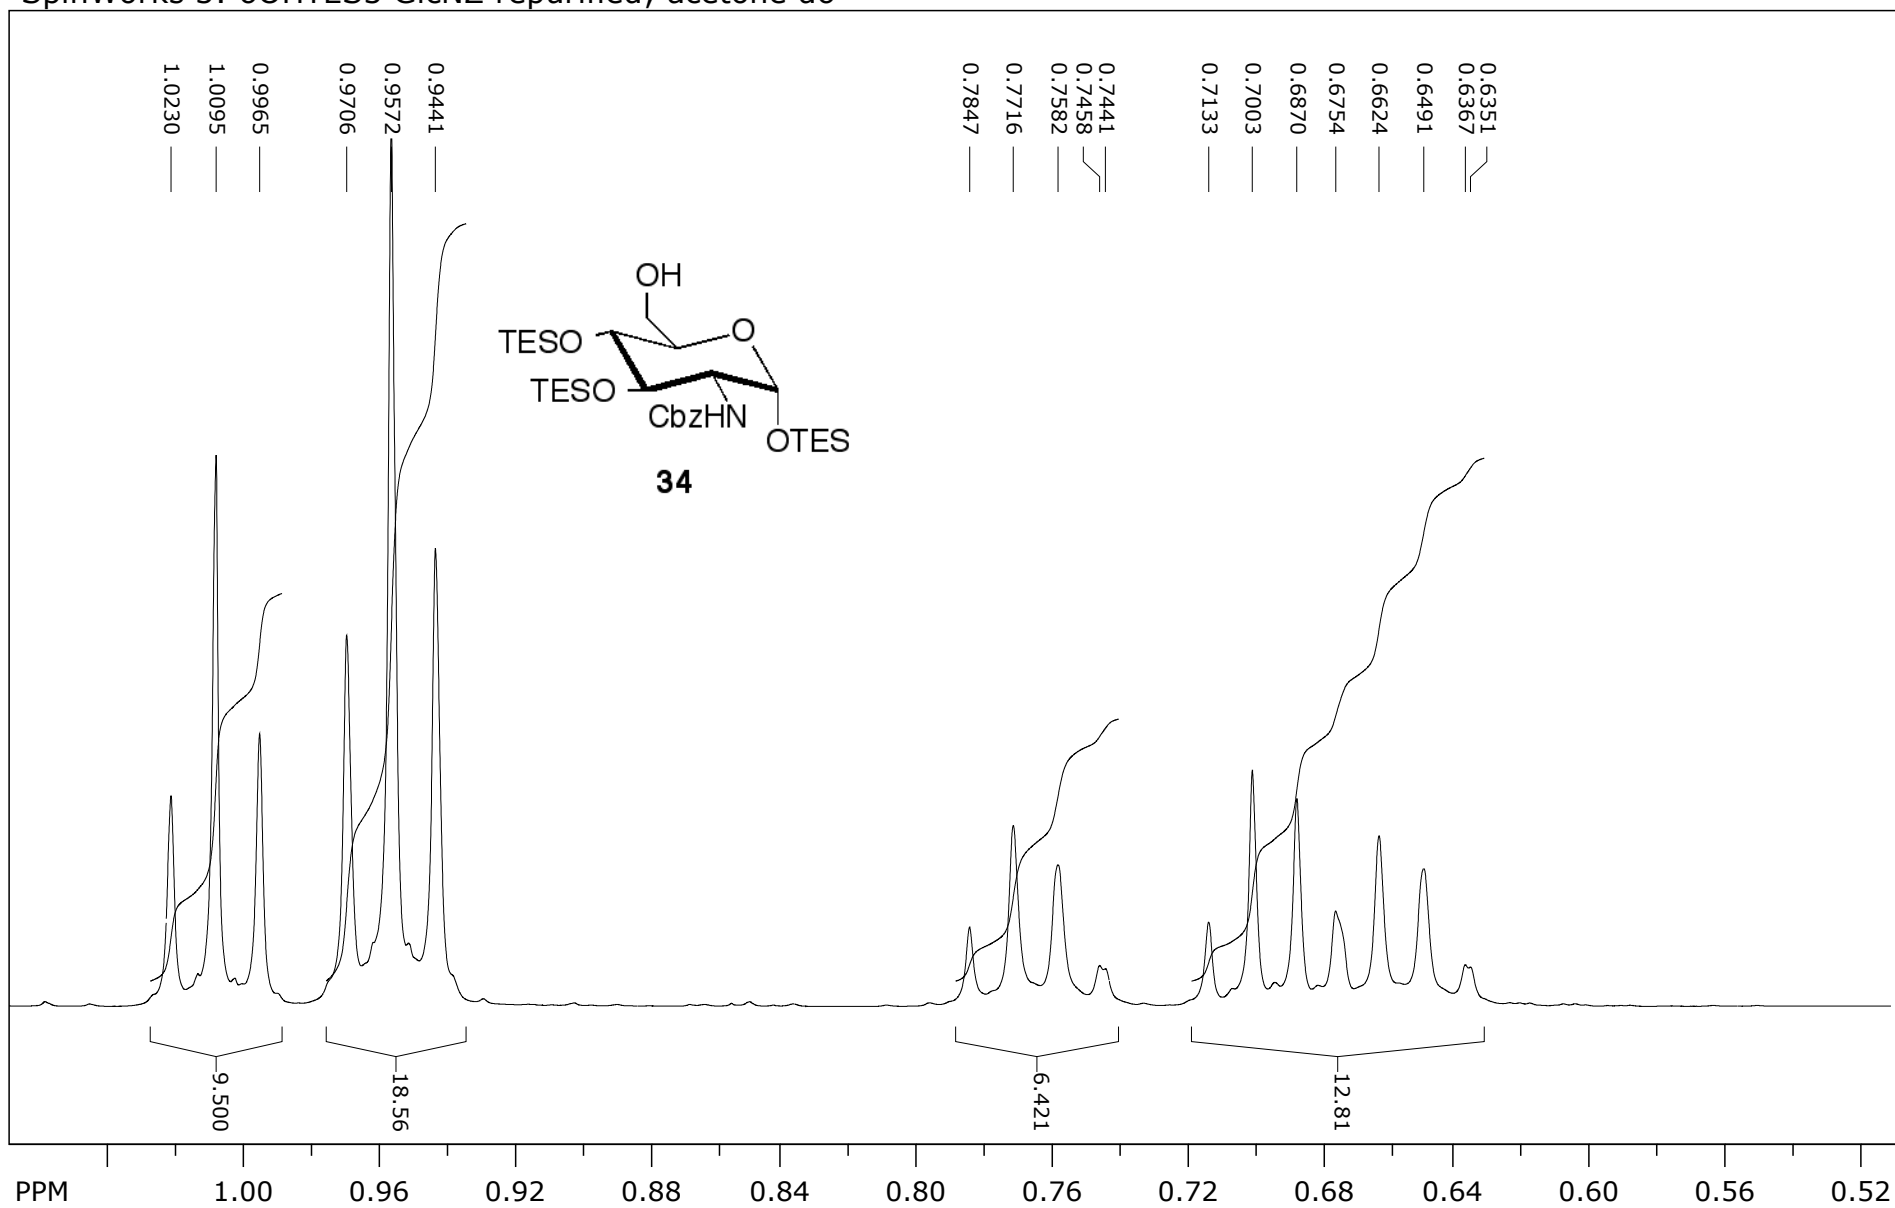

file: ... process\6OHTES3NZrepur\_acet\1\fid exp: <zgpr>  
transmitter freq.: 600.553538 MHz  
time domain size: 65536 points  
width: 7211.54 Hz = 12.0082 ppm = 0.110039 Hz/pt  
number of scans: 32

freq. of 0 ppm: 600.550010 MHz  
processed size: 262144 complex points  
LB: 0.000 GF: 0.0000  
Hz/cm: 13.495 ppm/cm: 0.02247

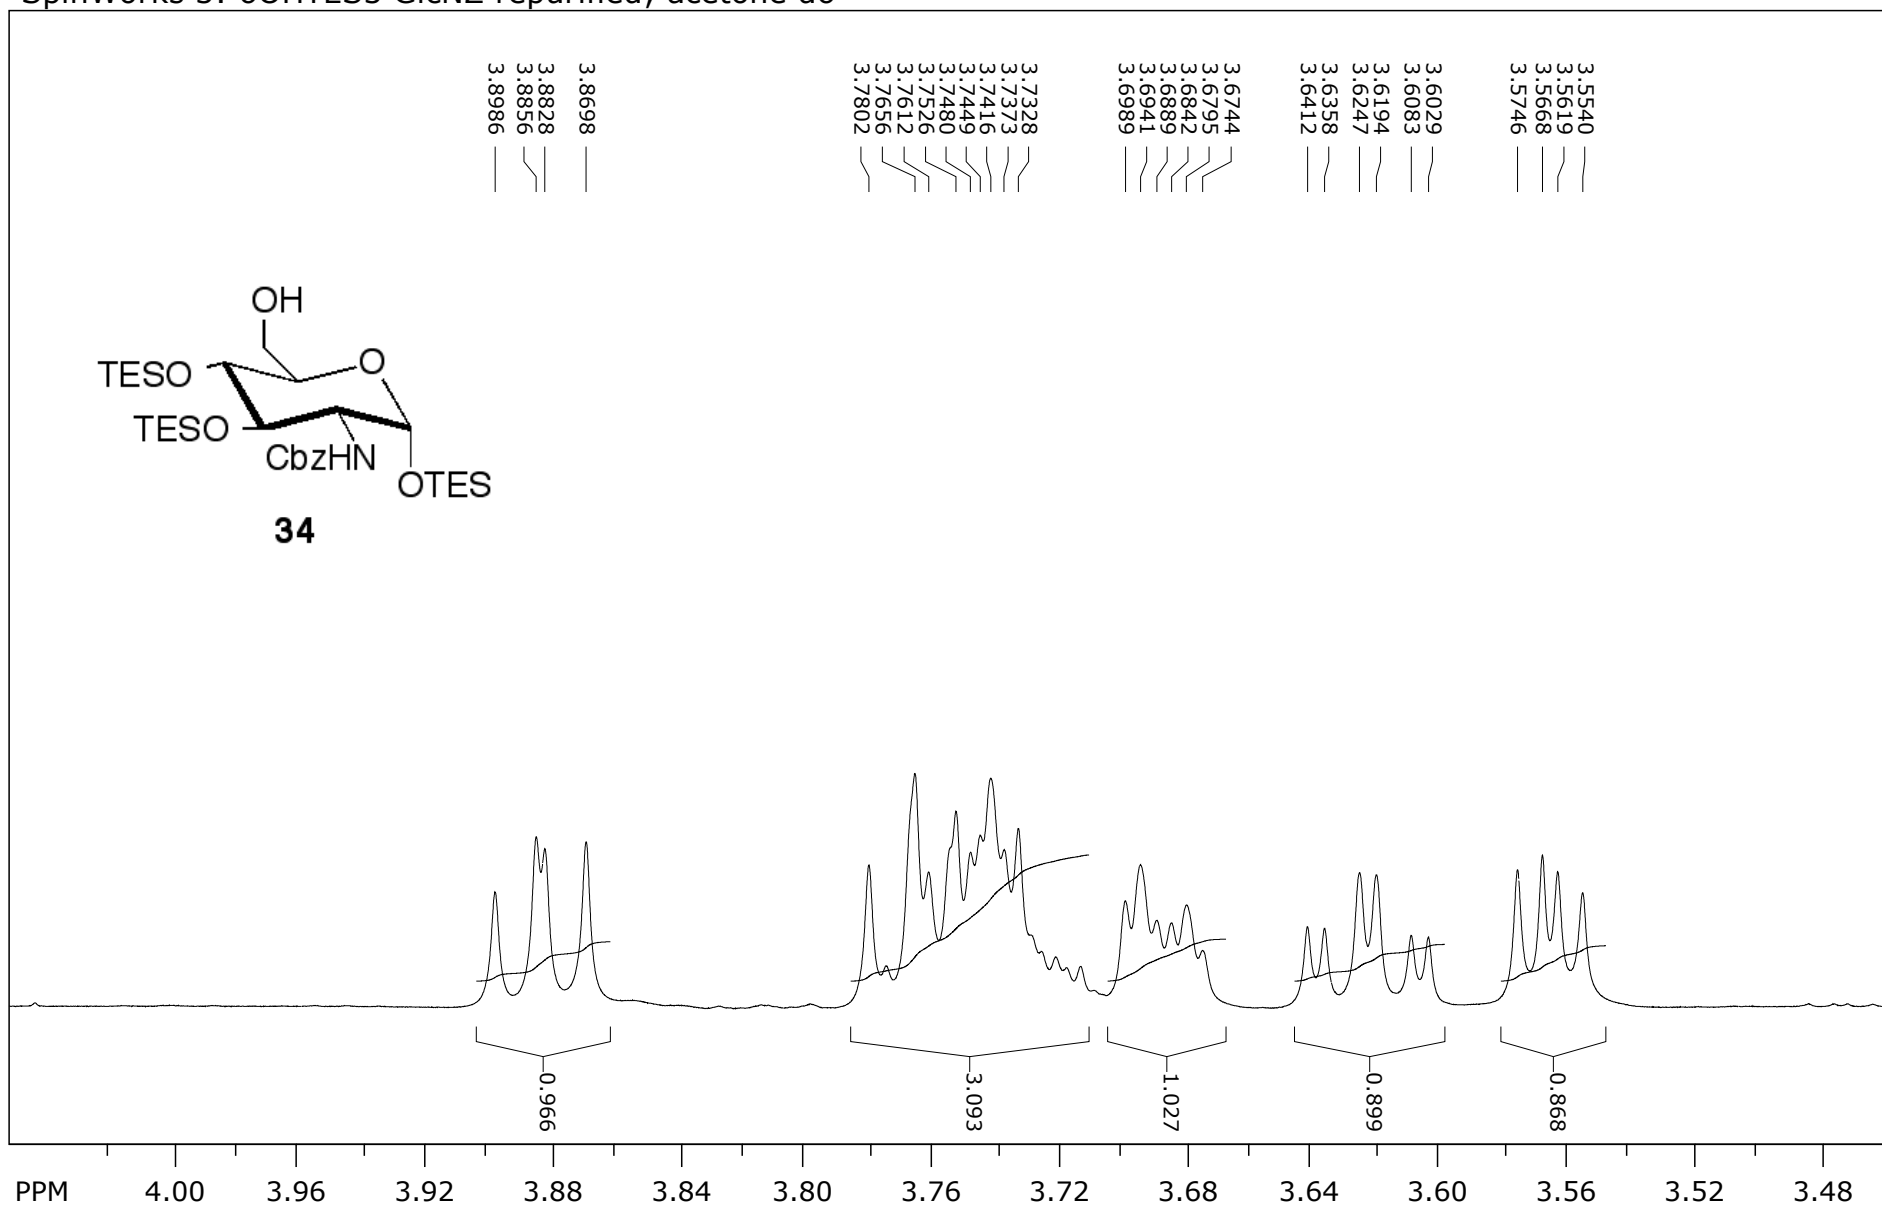

file: ... process\6OHTES3NZrepur\_acet\1\fid exp: <zgpr>  
transmitter freq.: 600.553538 MHz  
time domain size: 65536 points  
width: 7211.54 Hz = 12.0082 ppm = 0.110039 Hz/pt  
number of scans: 32

freq. of 0 ppm: 600.550010 MHz  
processed size: 262144 complex points  
LB: 0.000 GF: 0.0000  
Hz/cm: 14.326 ppm/cm: 0.02386

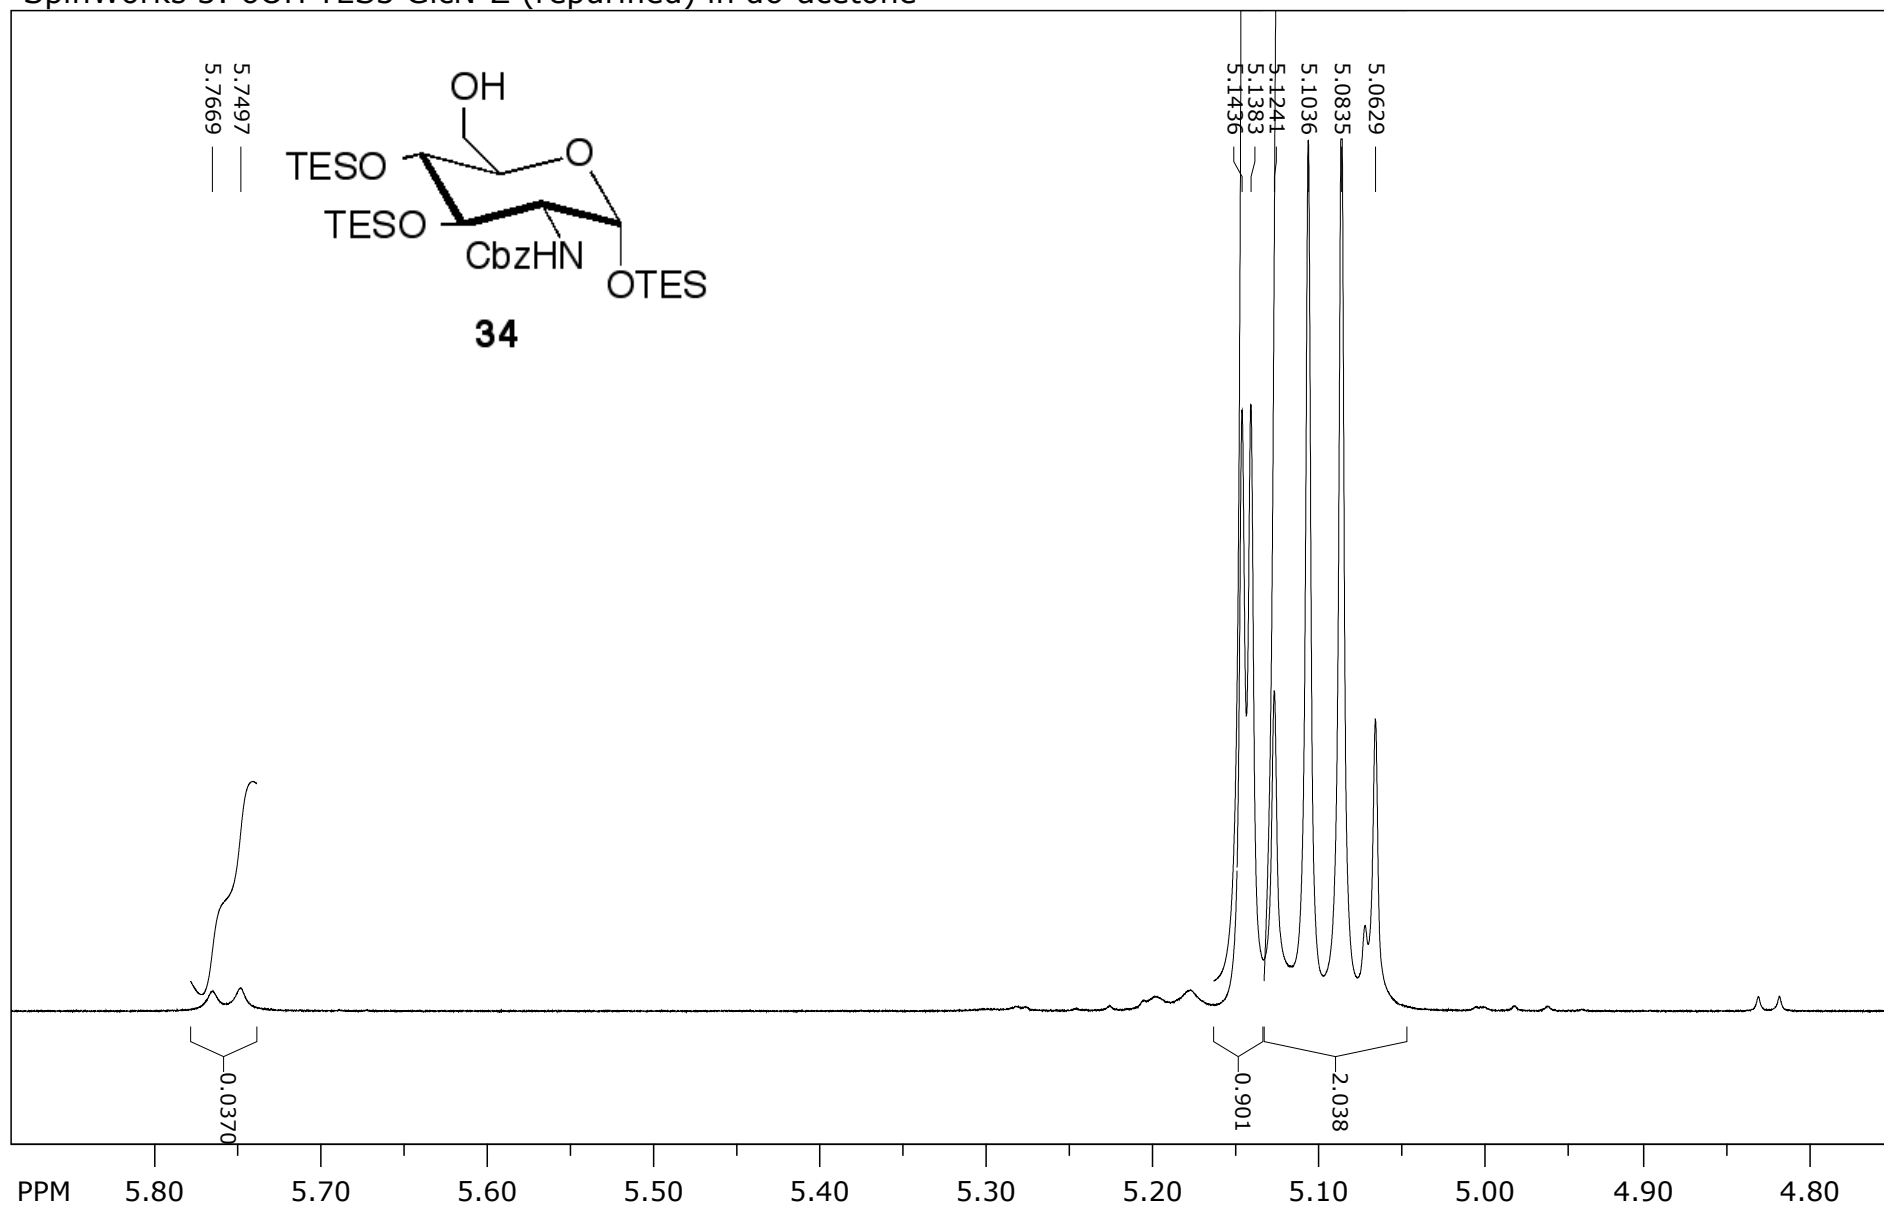

file: ...NMR Data\6OHTES3NZrepur\_acet\1\fid expt: <zgpr>  
transmitter freq.: 600.553538 MHz  
time domain size: 65536 points  
width: 7211.54 Hz = 12.0082 ppm = 0.110039 Hz/pt  
number of scans: 32

freq. of 0 ppm: 600.550010 MHz  
processed size: 262144 complex points  
LB: 0.000 GF: 0.0000  
Hz/cm: 27.365 ppm/cm: 0.04557

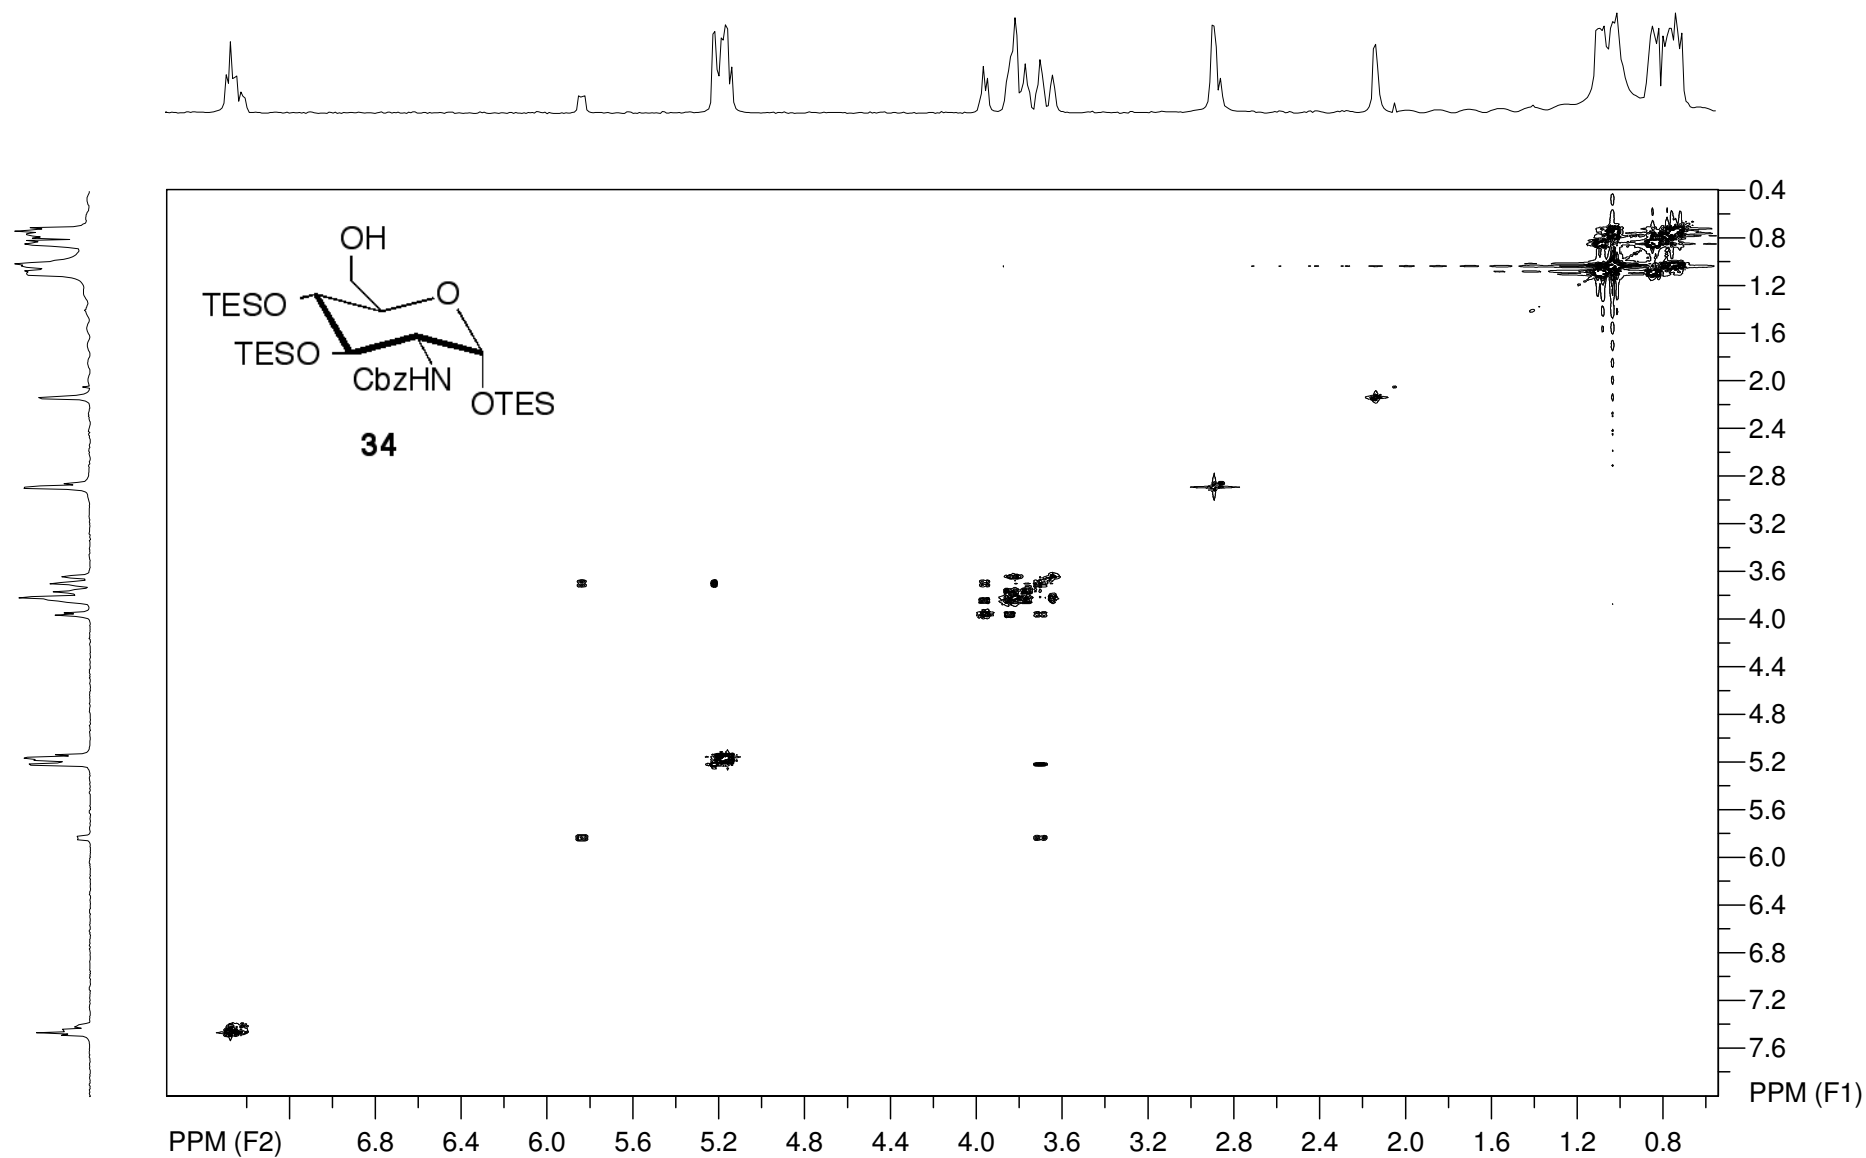

file: C:\Users\Jeff\Documents\NMR Folder\NMR Data\remaining to process\6OHTES3NZrepur\_COSYF2.:  
 transmitter freq.: 600.552832 MHz  
 time domain size: 2048 by 2048 points  
 width (F2): 6009.59 Hz = 10.006806 ppm = 2.934368 Hz/pt  
 number of scans: 2

processed size: 1024 complex points  
 window function: Sine  
 shift: 0.0 degrees  
 Hz/cm: 211.793 ppm/cm: 0.35266

F1: freq. of 0 ppm: 600.549962 MHz  
 processed size: 1024 complex points  
 window function: Sine  
 shift: 0.0 degrees  
 Hz/cm: 380.889 ppm/cm: 0.63423



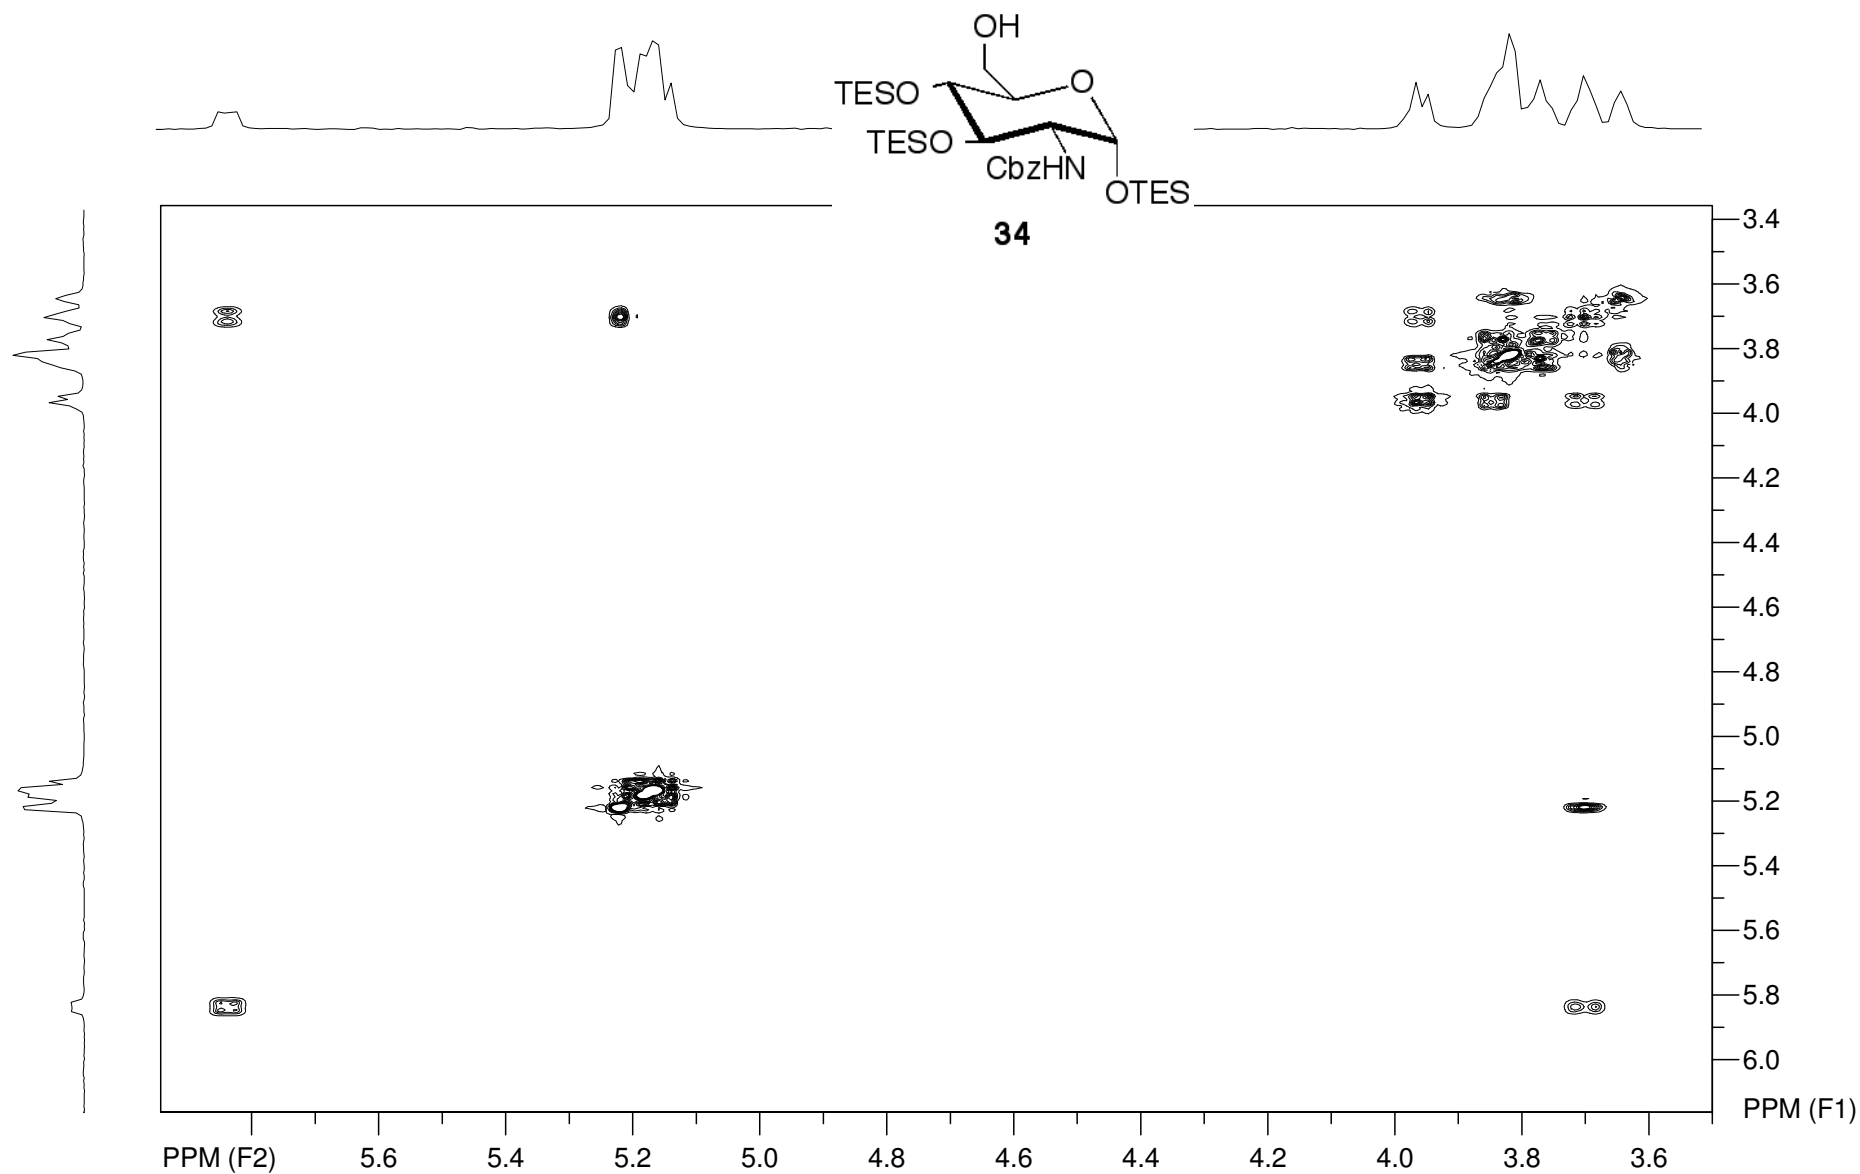

file: C:\Users\Jeff\Documents\NMR Folder\NMR Data\remaining to process\6OHTES3NZrepur\_COSYF2.:  
 transmitter freq.: 600.552832 MHz  
 time domain size: 2048 by 2048 points  
 width (F2): 6009.59 Hz = 10.006806 ppm = 2.934368 Hz/pt  
 number of scans: 2

freq. of 0 ppm: 600.549962 MHz  
 processed size: 1024 complex points  
 window function: Sine  
 shift: 0.0 degrees  
 Hz/cm: 71.575 ppm/cm: 0.11918

F1: freq. of 0 ppm: 600.549962 MHz  
 processed size: 1024 complex points  
 window function: Sine  
 shift: 0.0 degrees  
 Hz/cm: 140.423 ppm/cm: 0.23382

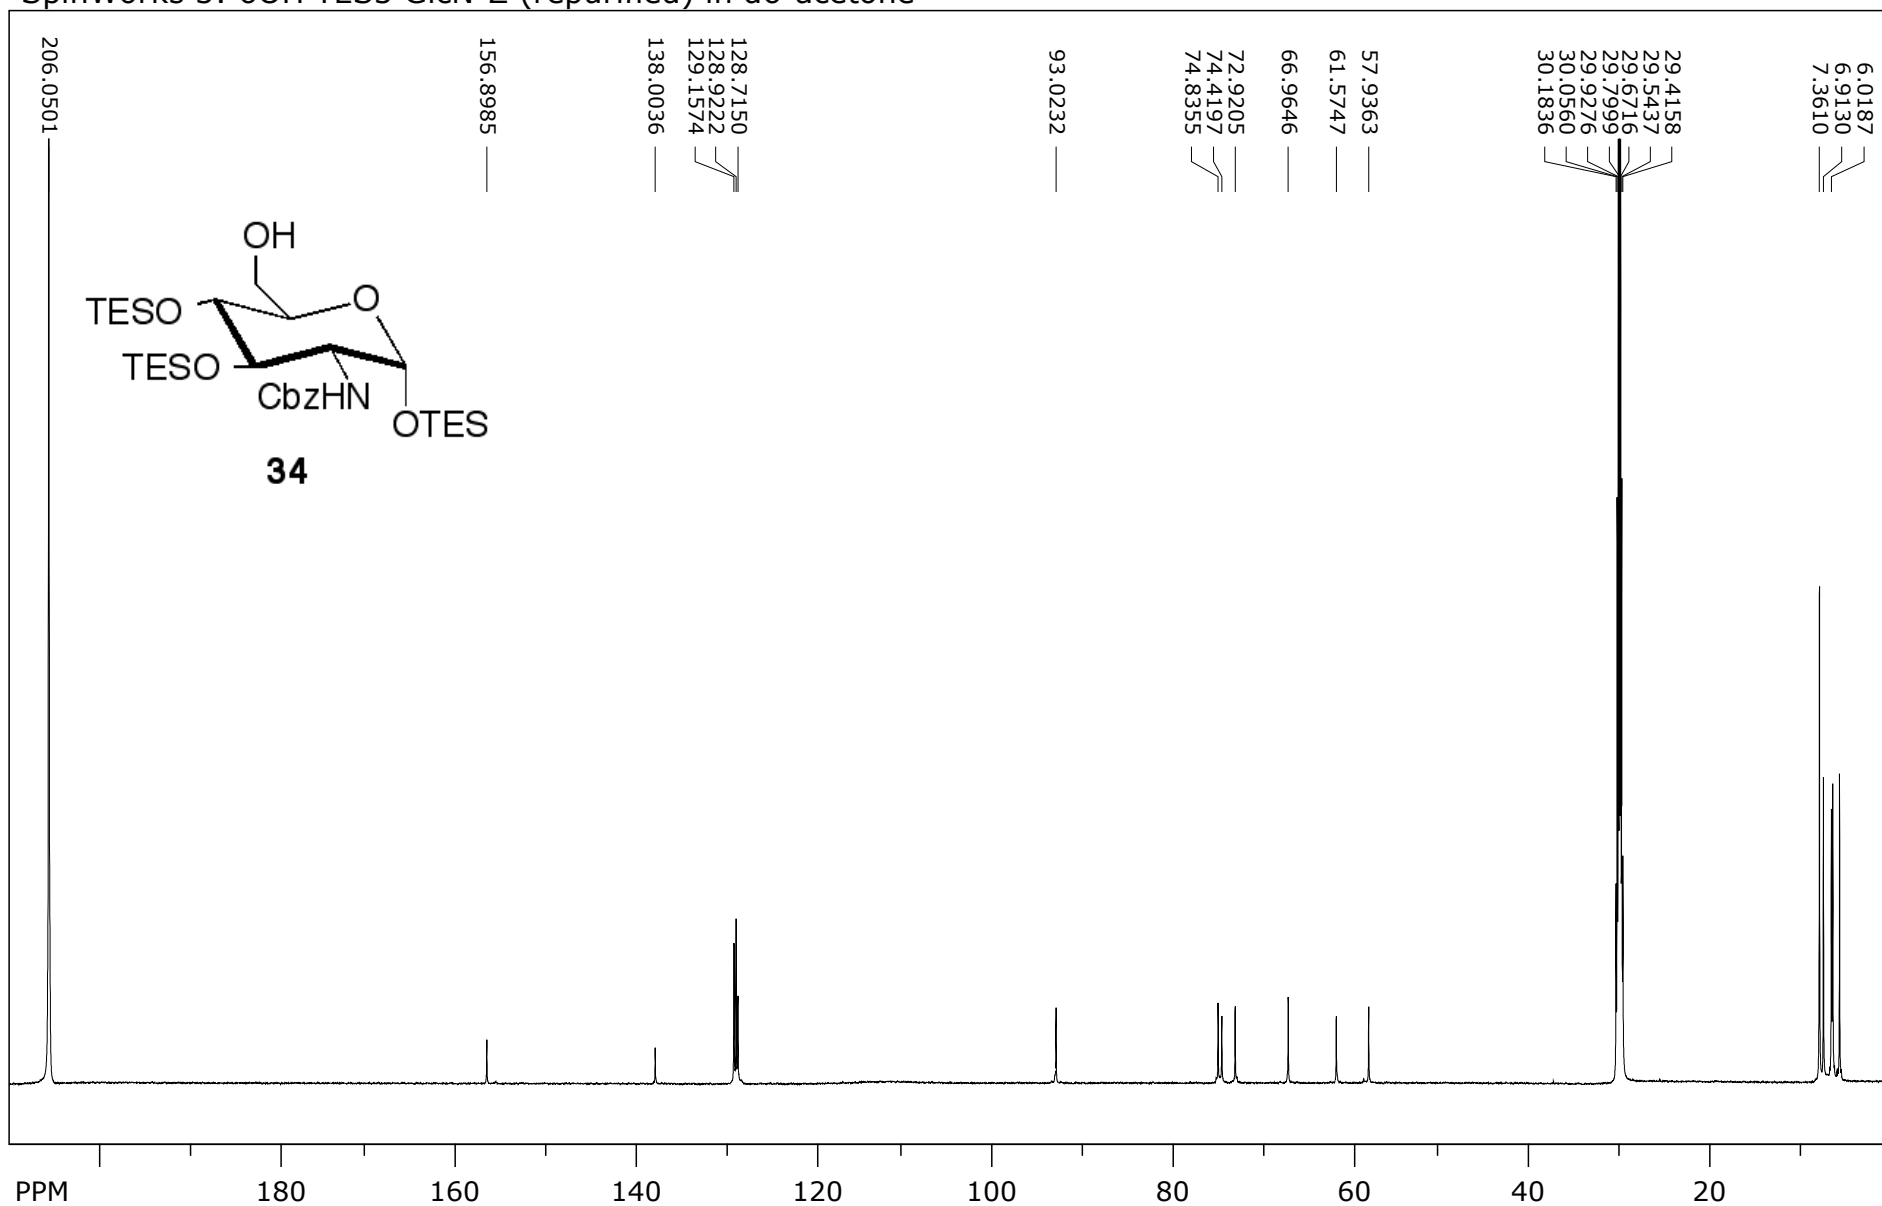

file: ... Data\6OHTES3NZrepur\_acet13C\1\fid expt: <zpgg30>  
transmitter freq.: 151.023519 MHz  
time domain size: 65536 points  
width: 36057.69 Hz = 238.7555 ppm = 0.550197 Hz/pt  
number of scans: 22528

freq. of 0 ppm: 151.008289 MHz  
processed size: 32768 complex points  
LB: 5.000 GF: 0.0000  
Hz/cm: 1275.702 ppm/cm: 8.44704

|               |                     |             |                      |                 |              |                        |                      |
|---------------|---------------------|-------------|----------------------|-----------------|--------------|------------------------|----------------------|
| Sample Name   | Jeff 22             | Position    | Vial 74              | Instrument Name | Instrument 1 | User Name              | DYL                  |
| Inj Vol       | 1                   | InjPosition |                      | SampleType      | Unknown      | IRM Calibration Status | Success              |
| Data Filename | Direct_no MeOH_Vial | ACQ Method  | Direct_small mol_Jef | Comment         |              | Acquired Time          | 8/21/2012 1:48:46 PM |

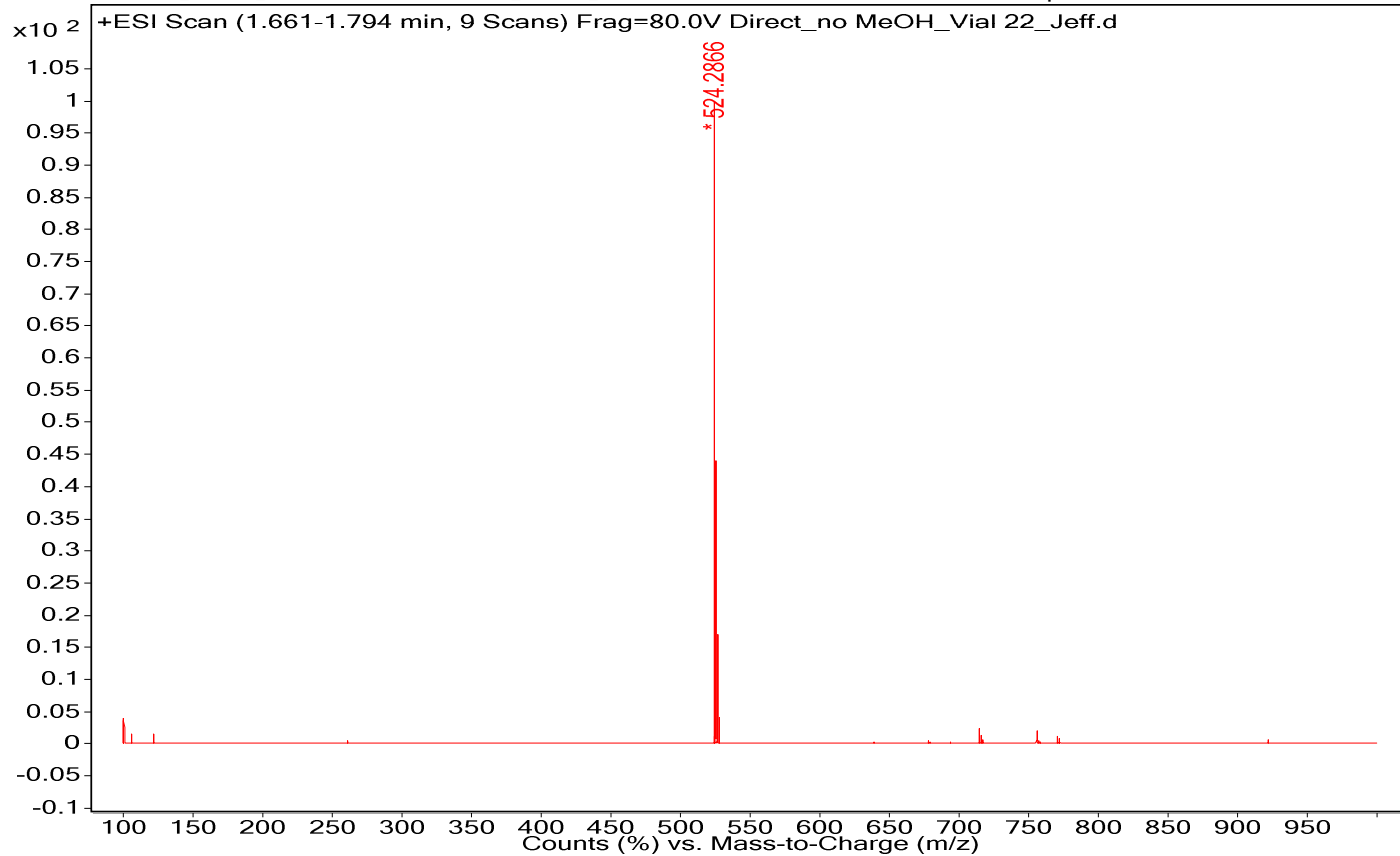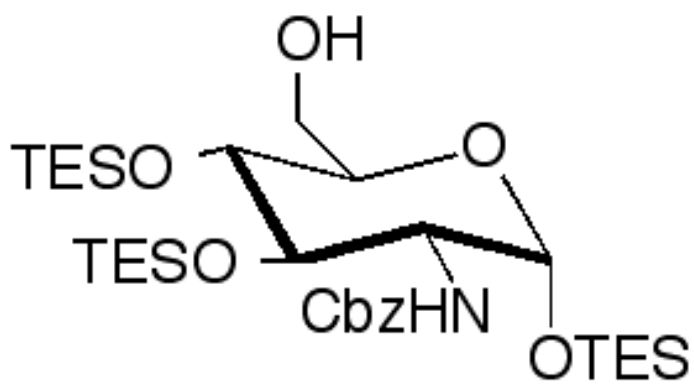**34**

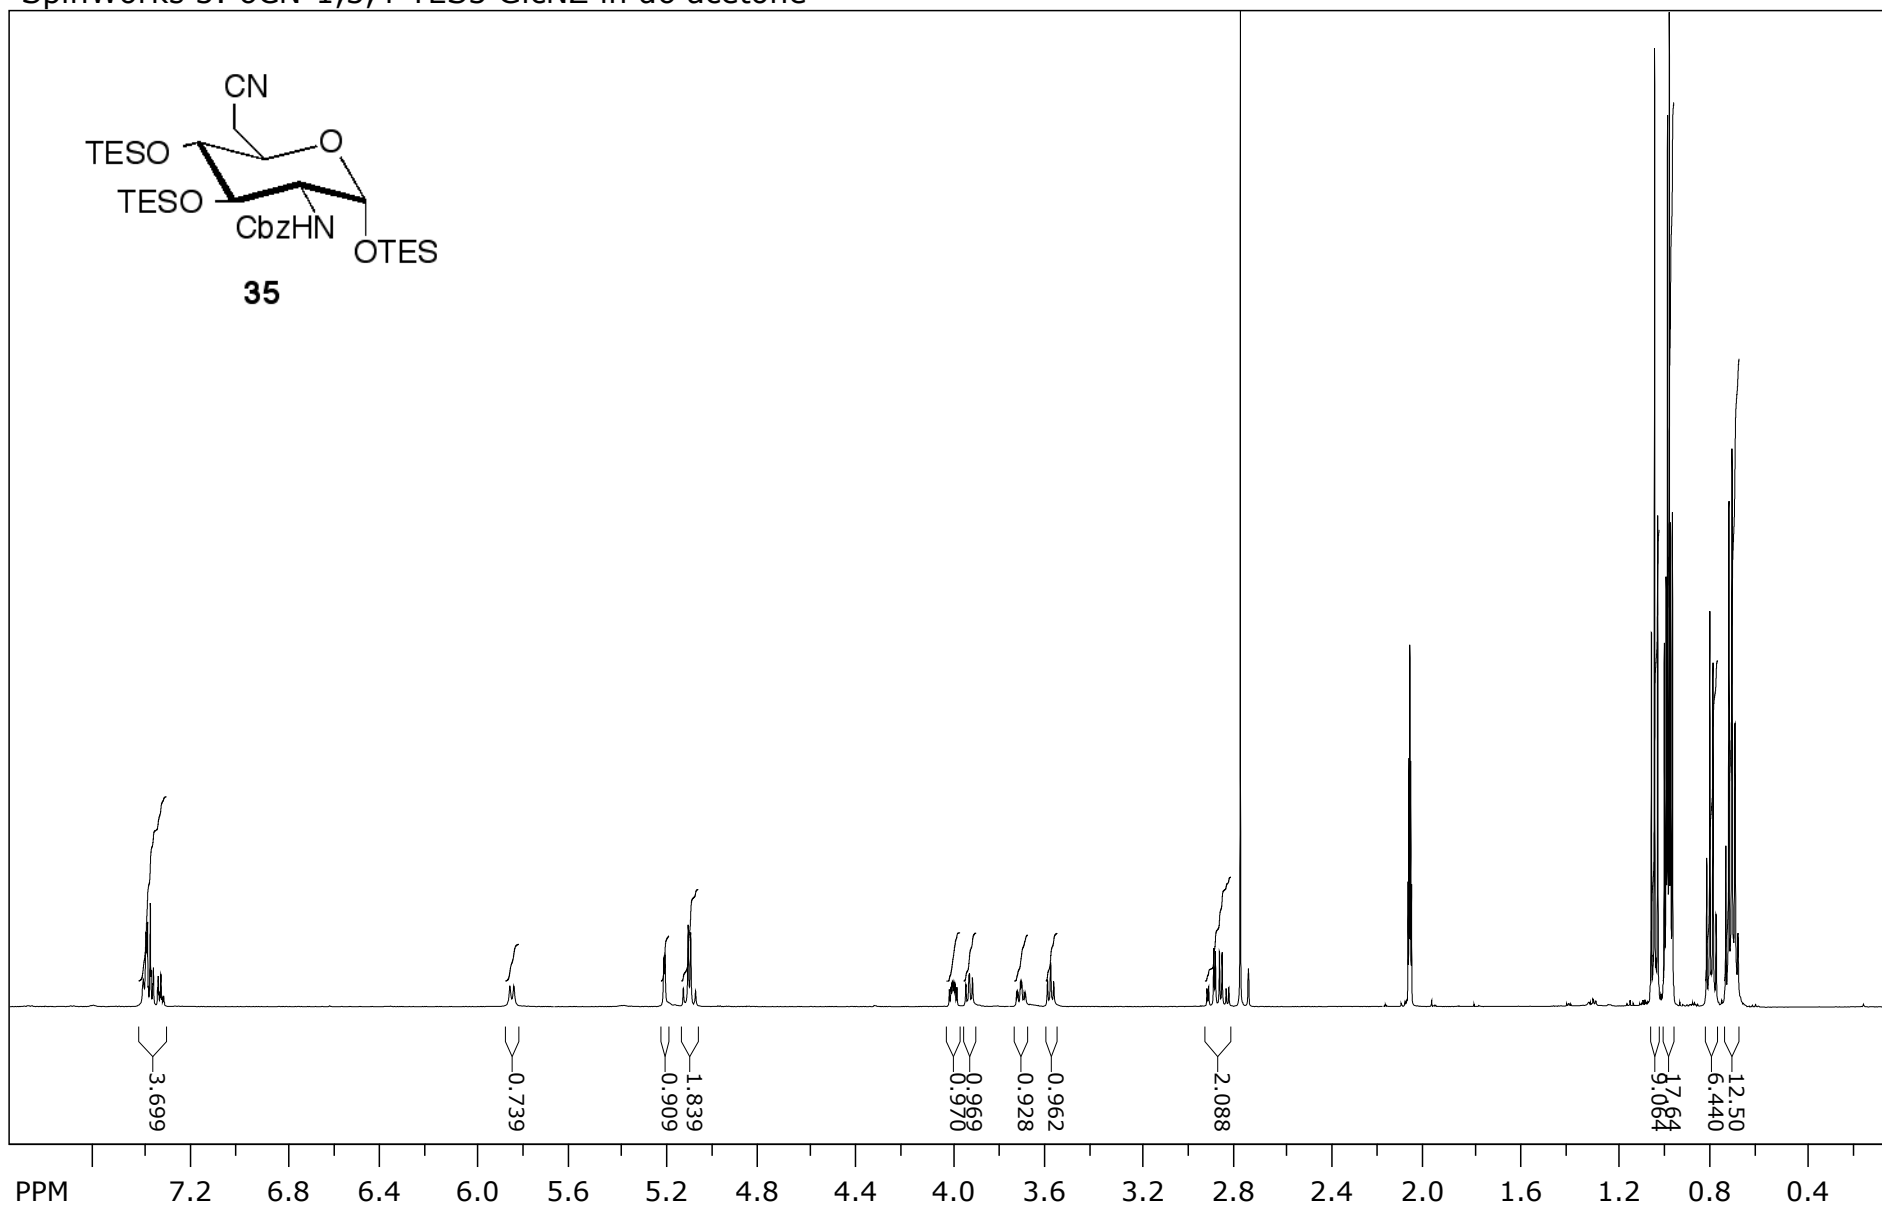

file: ...CNTES3GlcNZ\_acet\_p1optimized\2\fid expt: <zgpr>  
transmitter freq.: 600.552832 MHz  
time domain size: 65536 points  
width: 9615.38 Hz = 16.0109 ppm = 0.146719 Hz/pt  
number of scans: 16

freq. of 0 ppm: 600.550010 MHz  
processed size: 262144 complex points  
LB: 0.000 GF: 0.0000  
Hz/cm: 191.020 ppm/cm: 0.31807

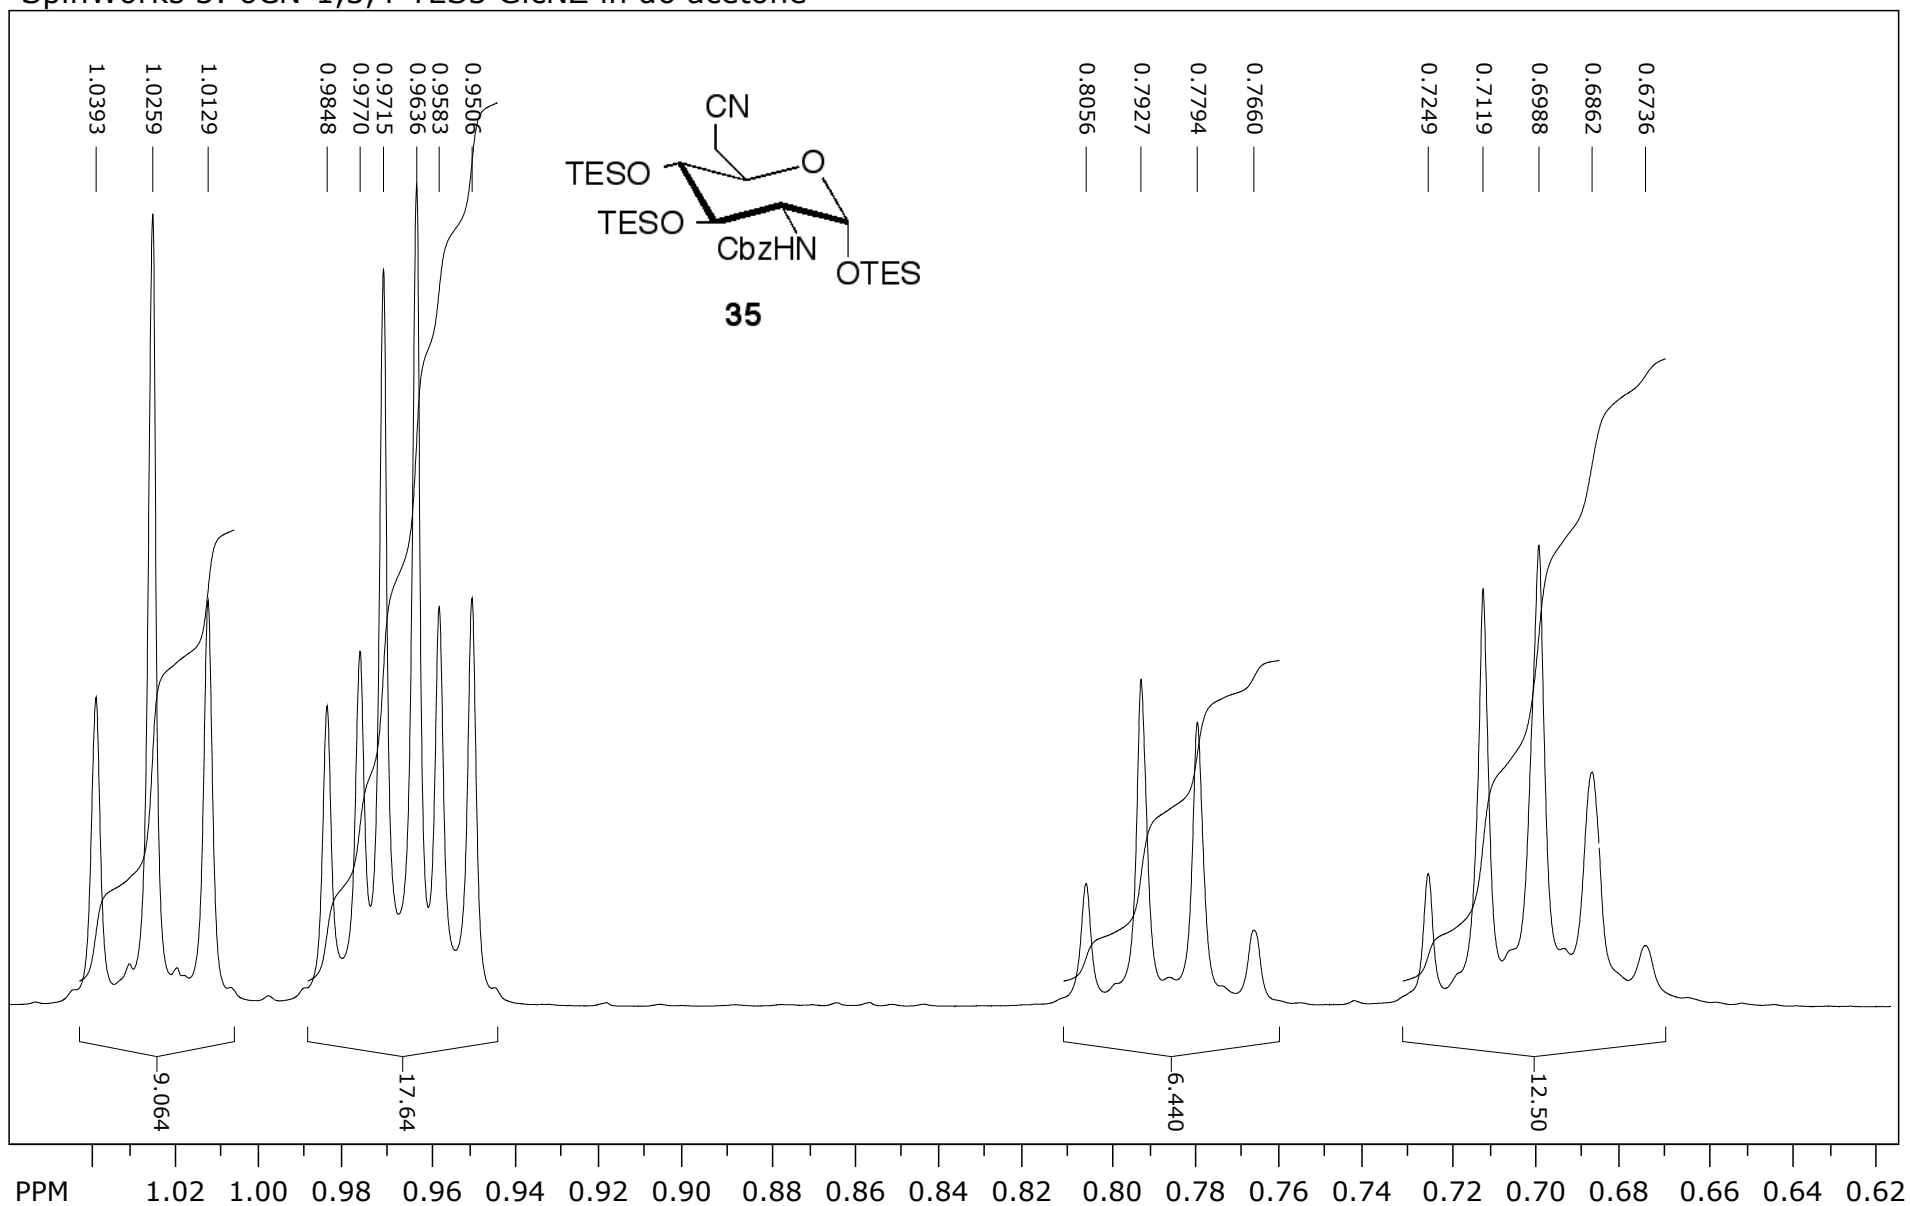

file: ...CNTES3GlcNZ\_acet\_p1optimized\2\fid expt: <zgpr>  
 transmitter freq.: 600.552832 MHz  
 time domain size: 65536 points  
 width: 9615.38 Hz = 16.0109 ppm = 0.146719 Hz/pt  
 number of scans: 16

freq. of 0 ppm: 600.550010 MHz  
 processed size: 262144 complex points  
 LB: 0.000 GF: 0.0000  
 Hz/cm: 10.671 ppm/cm: 0.01777

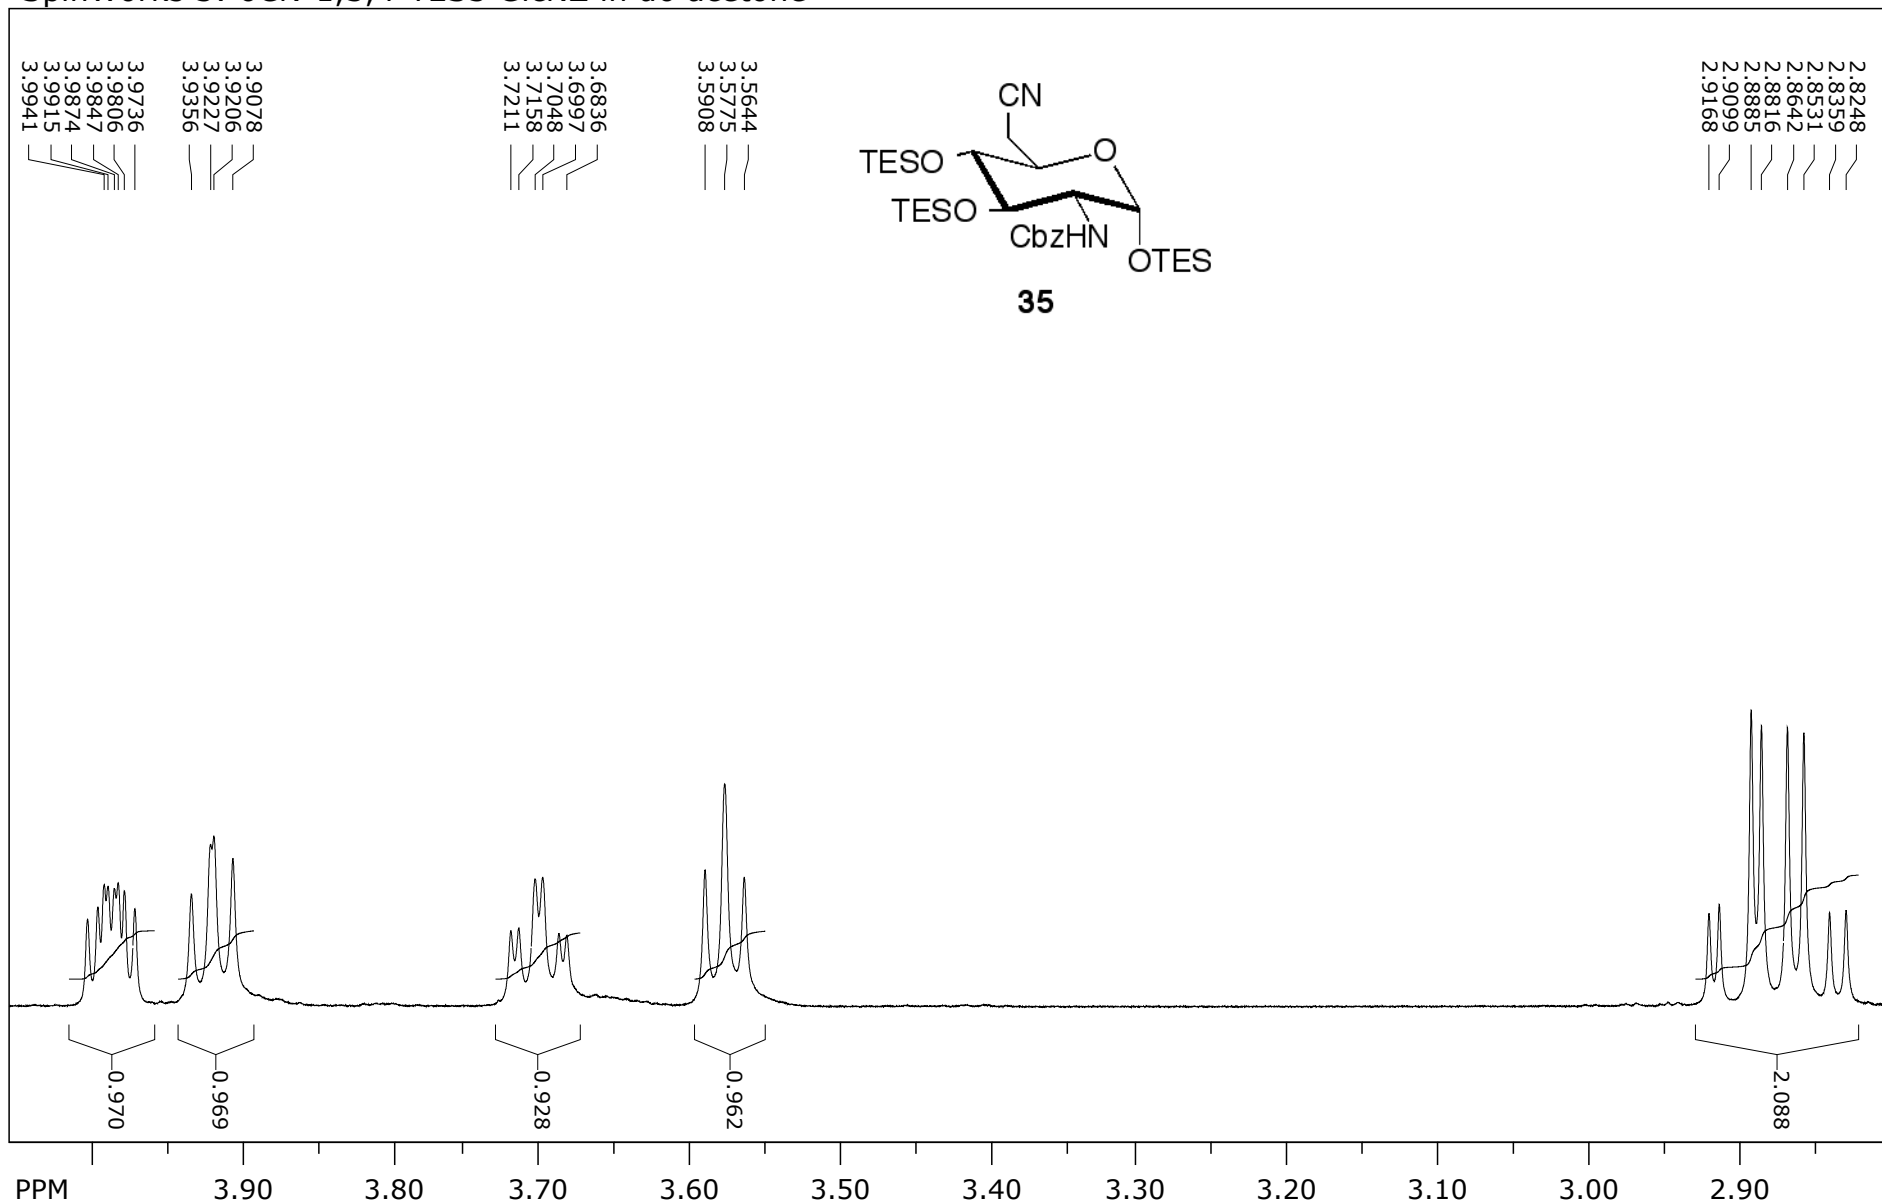

file: ...CNTES3GlcNZ\_acet\_p1optimized\2\fid expt: <zgpr>  
 transmitter freq.: 600.552832 MHz  
 time domain size: 65536 points  
 width: 9615.38 Hz = 16.0109 ppm = 0.146719 Hz/pt  
 number of scans: 16

freq. of 0 ppm: 600.550010 MHz  
 processed size: 262144 complex points  
 LB: 0.000 GF: 0.0000  
 Hz/cm: 30.352 ppm/cm: 0.05054

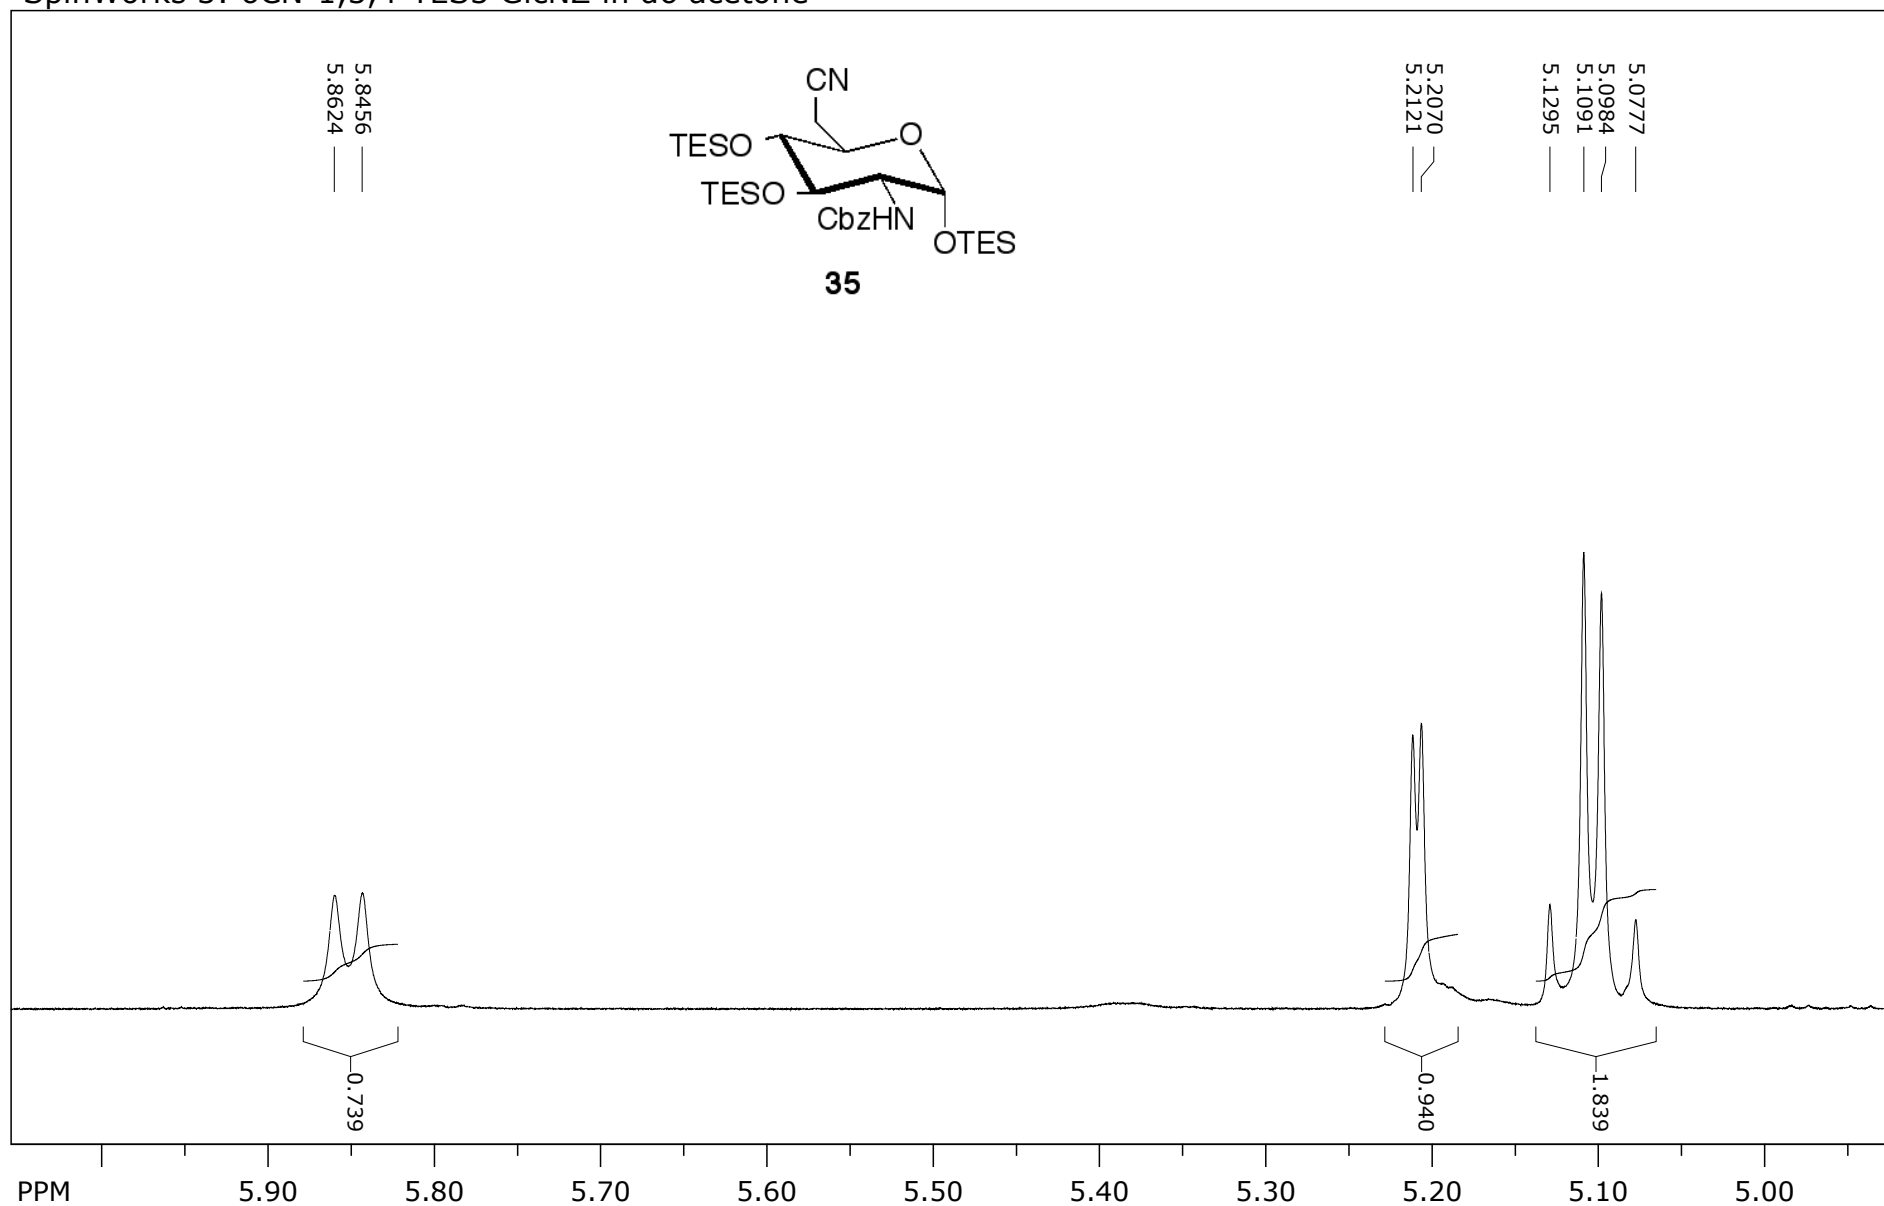

file: ...CNTES3GlcNZ\_acet\_p1optimized\2\fid expt: <zgpr>  
transmitter freq.: 600.552832 MHz  
time domain size: 65536 points  
width: 9615.38 Hz = 16.0109 ppm = 0.146719 Hz/pt  
number of scans: 16

freq. of 0 ppm: 600.550010 MHz  
processed size: 262144 complex points  
LB: 0.000 GF: 0.0000  
Hz/cm: 27.258 ppm/cm: 0.04539

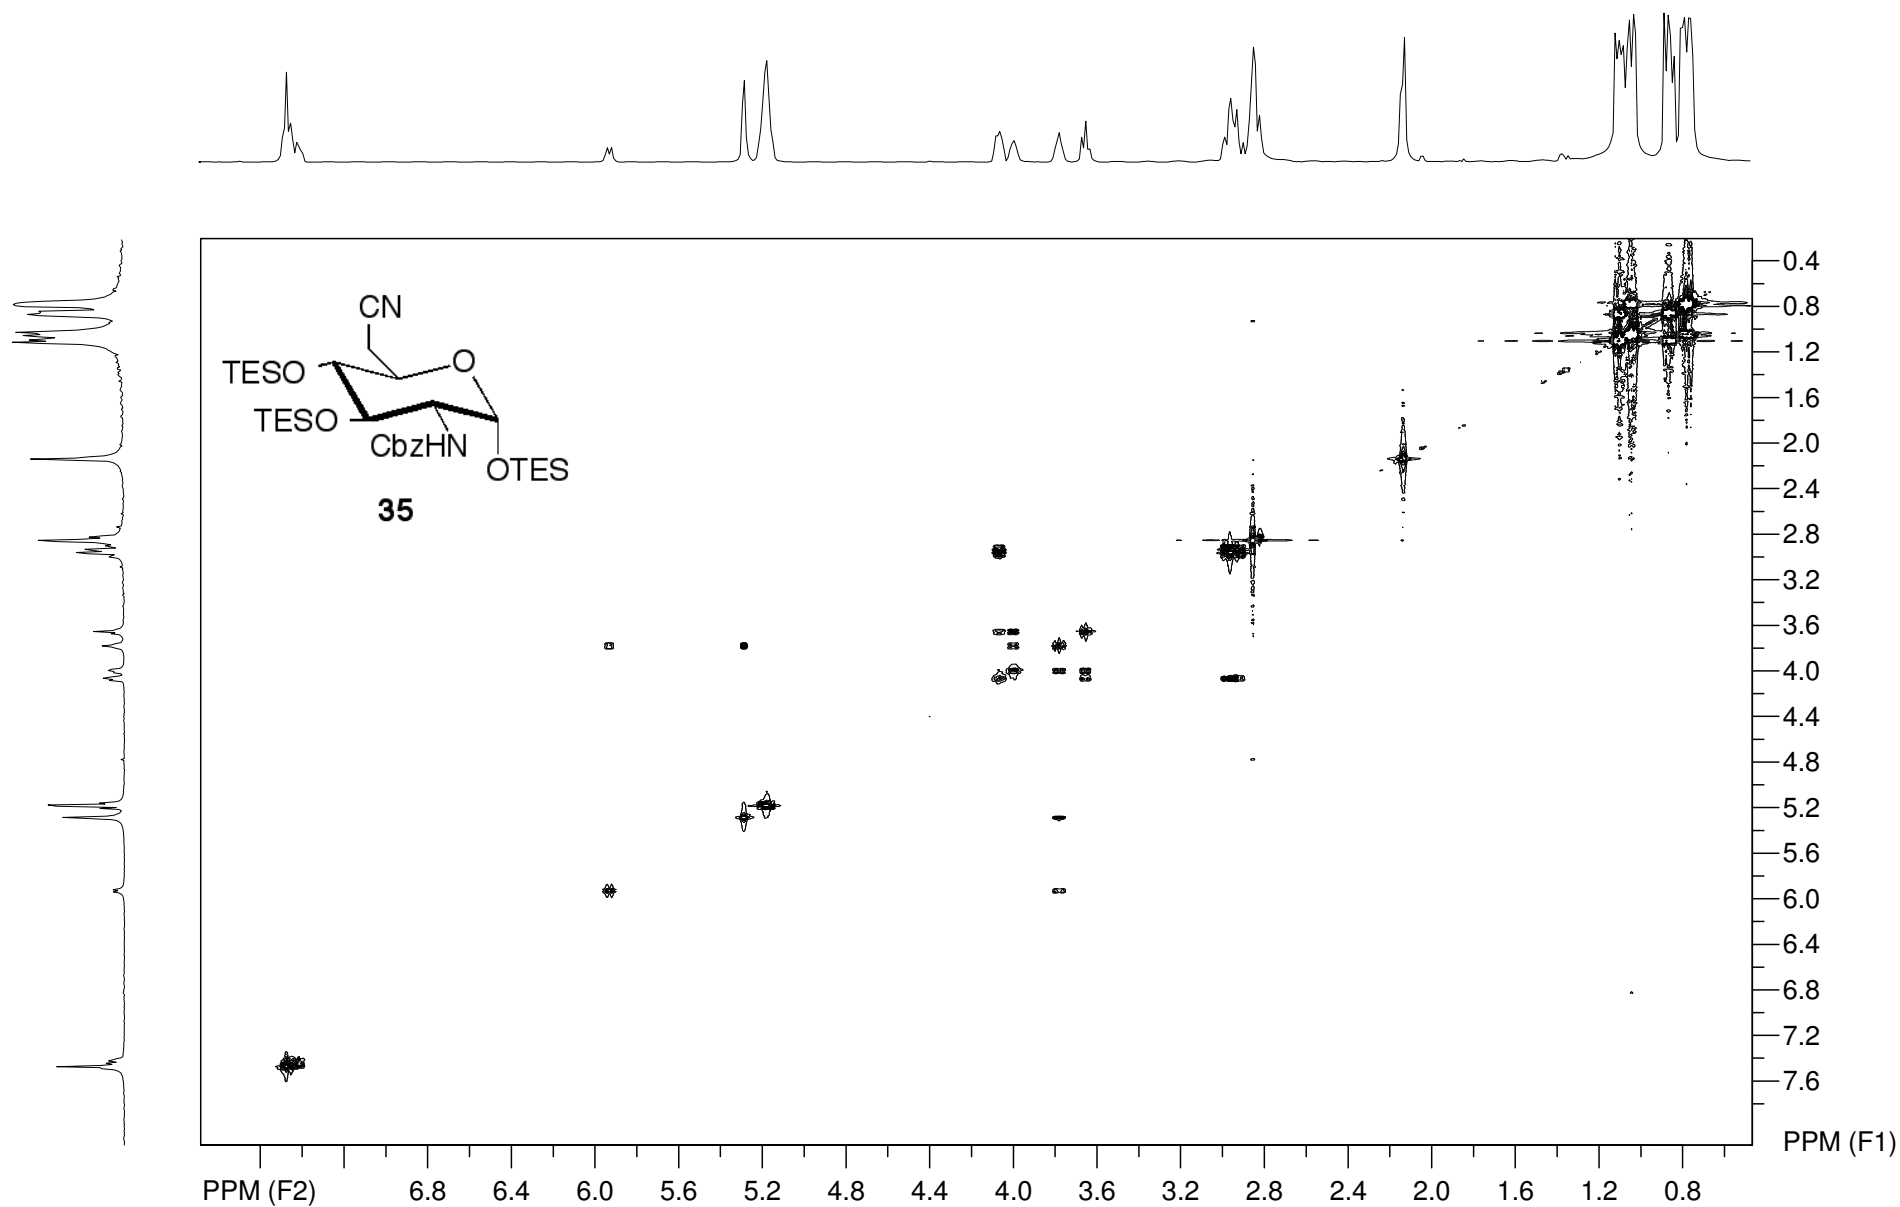

file: C:\Users\Jeff\Documents\NMR Folder\NMR Data\remaining to process\6CNTES3GlcNZ\_COSY\_f2:\freq. of 0 ppm: 600.549962 MHz  
 transmitter freq.: 600.552832 MHz  
 time domain size: 2048 by 2048 points  
 width (F2): 6009.59 Hz = 10.006806 ppm = 2.934368 Hz/pt  
 number of scans: 2

processed size: 1024 complex points  
 window function: Sine  
 shift: 0.0 degrees  
 Hz/cm: 217.327 ppm/cm: 0.36188

F1: freq. of 0 ppm: 600.549962 MHz  
 processed size: 1024 complex points  
 window function: Sine  
 shift: 0.0 degrees  
 Hz/cm: 398.310 ppm/cm: 0.66324



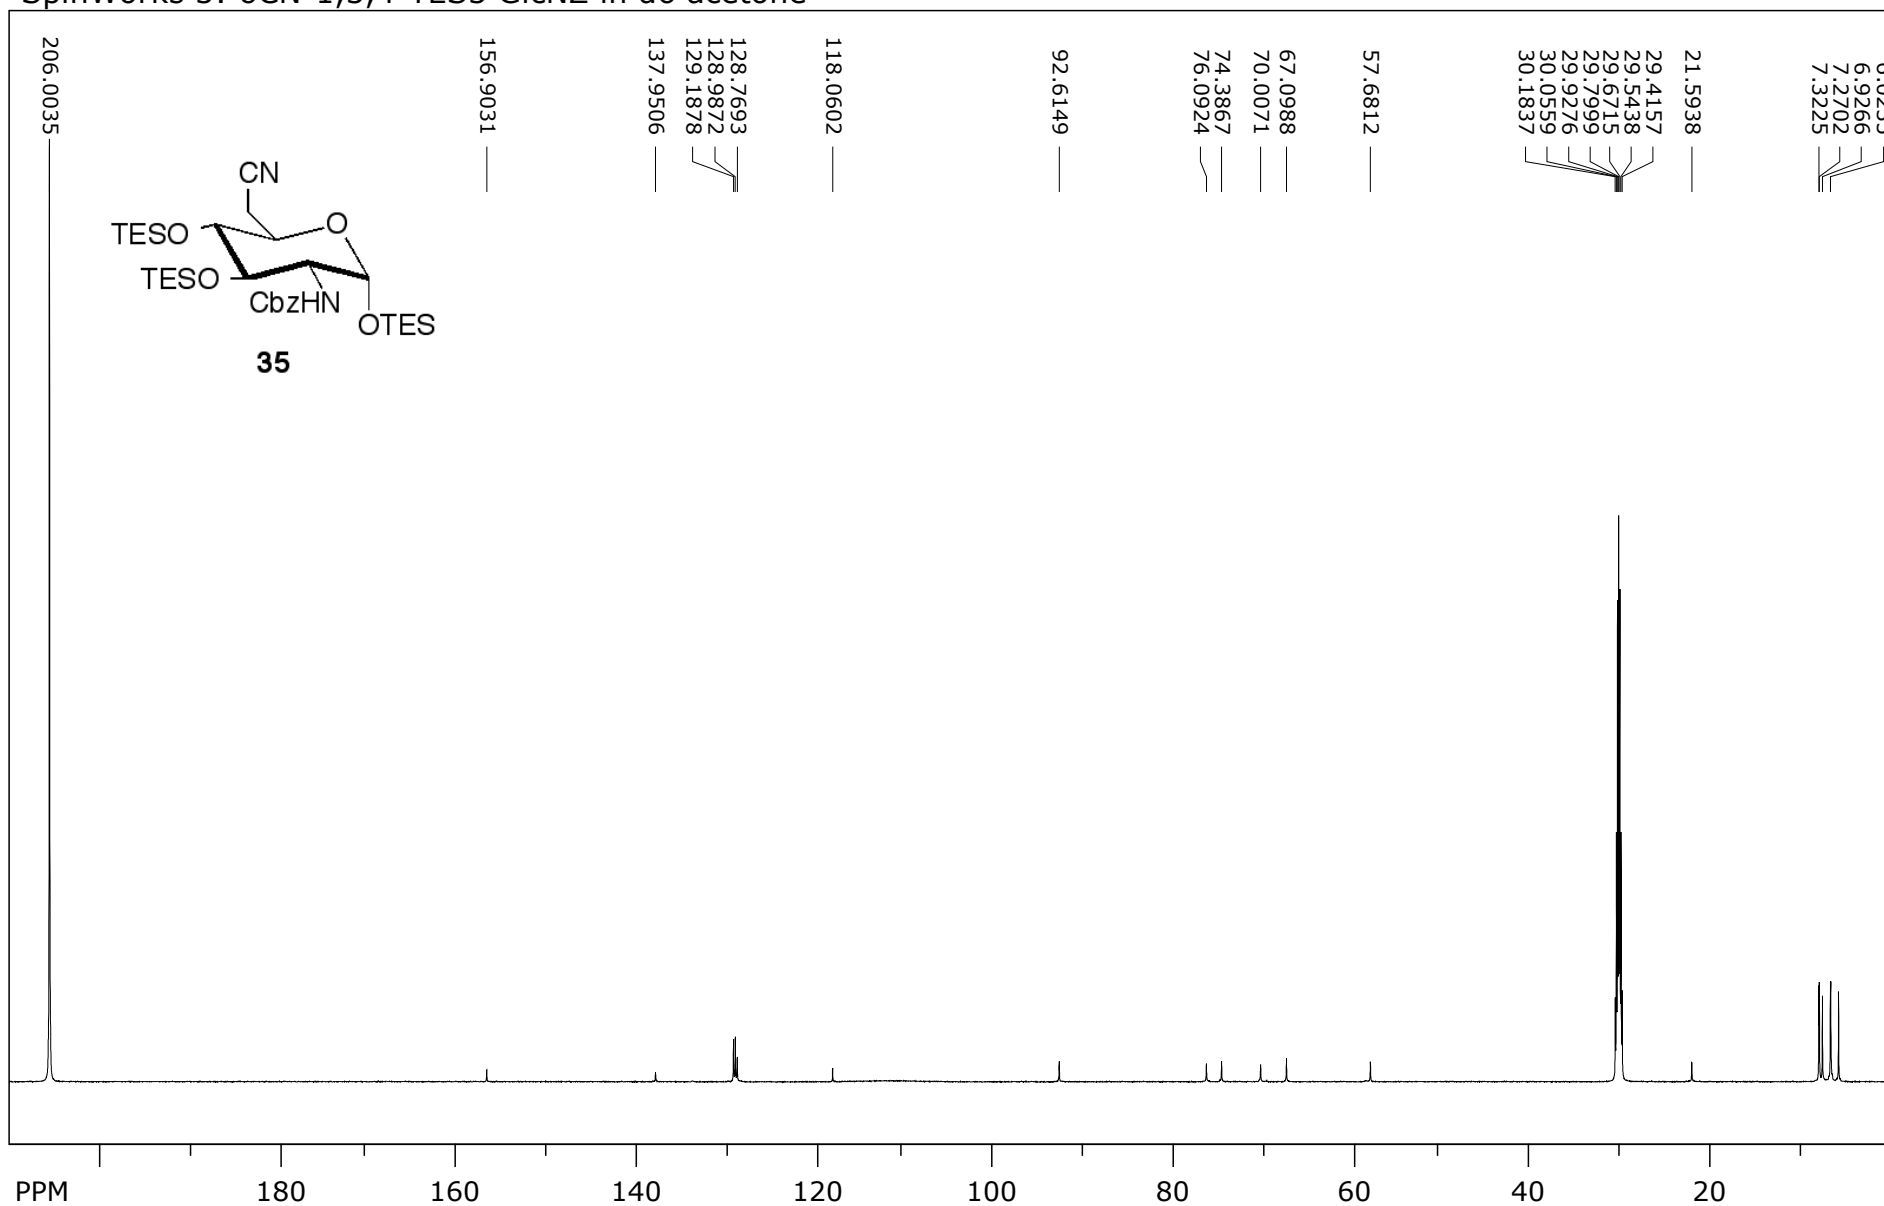

file: ...ess\6CNTES3GlcNZ\_13C\_acetone\1\fid expt: <zpgg30>  
transmitter freq.: 151.023519 MHz  
time domain size: 65536 points  
width: 36057.69 Hz = 238.7555 ppm = 0.550197 Hz/pt  
number of scans: 25600

freq. of 0 ppm: 151.008284 MHz  
processed size: 32768 complex points  
LB: 5.000 GF: 0.0000  
Hz/cm: 1276.507 ppm/cm: 8.45237

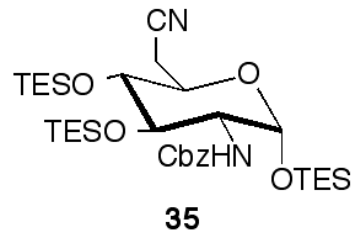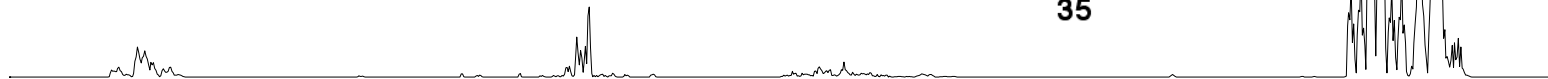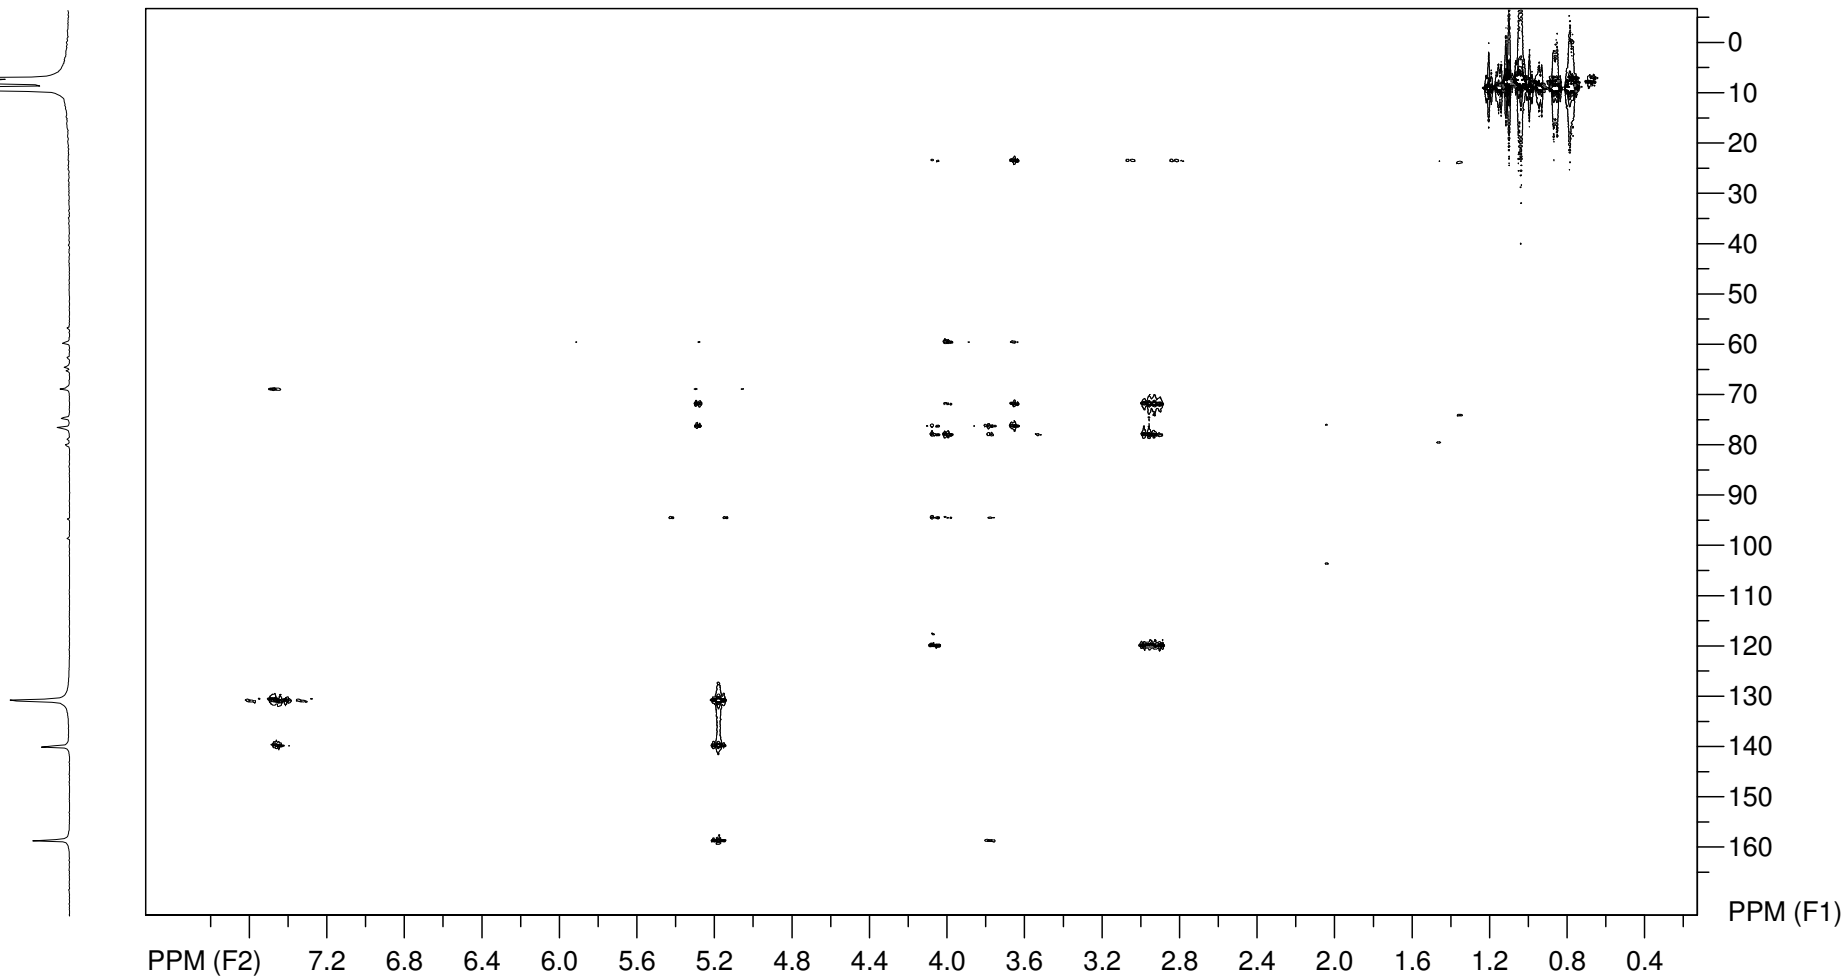

file: C:\Users\Jeff\Documents\NMR Folder\NMR Data\remaining to process\6CNTES3GlcNZ\_HMBC\_F2:tfreq. of 0 ppm: 600.549962 MHz  
 transmitter freq.: 600.553783 MHz  
 time domain size: 4096 by 4096 points  
 width (F2): 7812.45 Hz = 13.008827 ppm = 1.907336 Hz/pt  
 number of scans: 2

processed size: 2048 complex points  
 window function: Sine  
 shift: 0.0 degrees  
 Hz/cm: 234.558 ppm/cm: 0.39057

F1: freq. of 0 ppm: 151.008006 MHz  
 processed size: 1024 complex points  
 window function: Sine  
 shift: 0.0 degrees  
 Hz/cm: 2268.833 ppm/cm: 15.02304

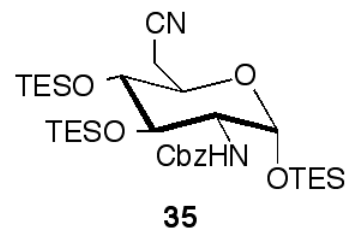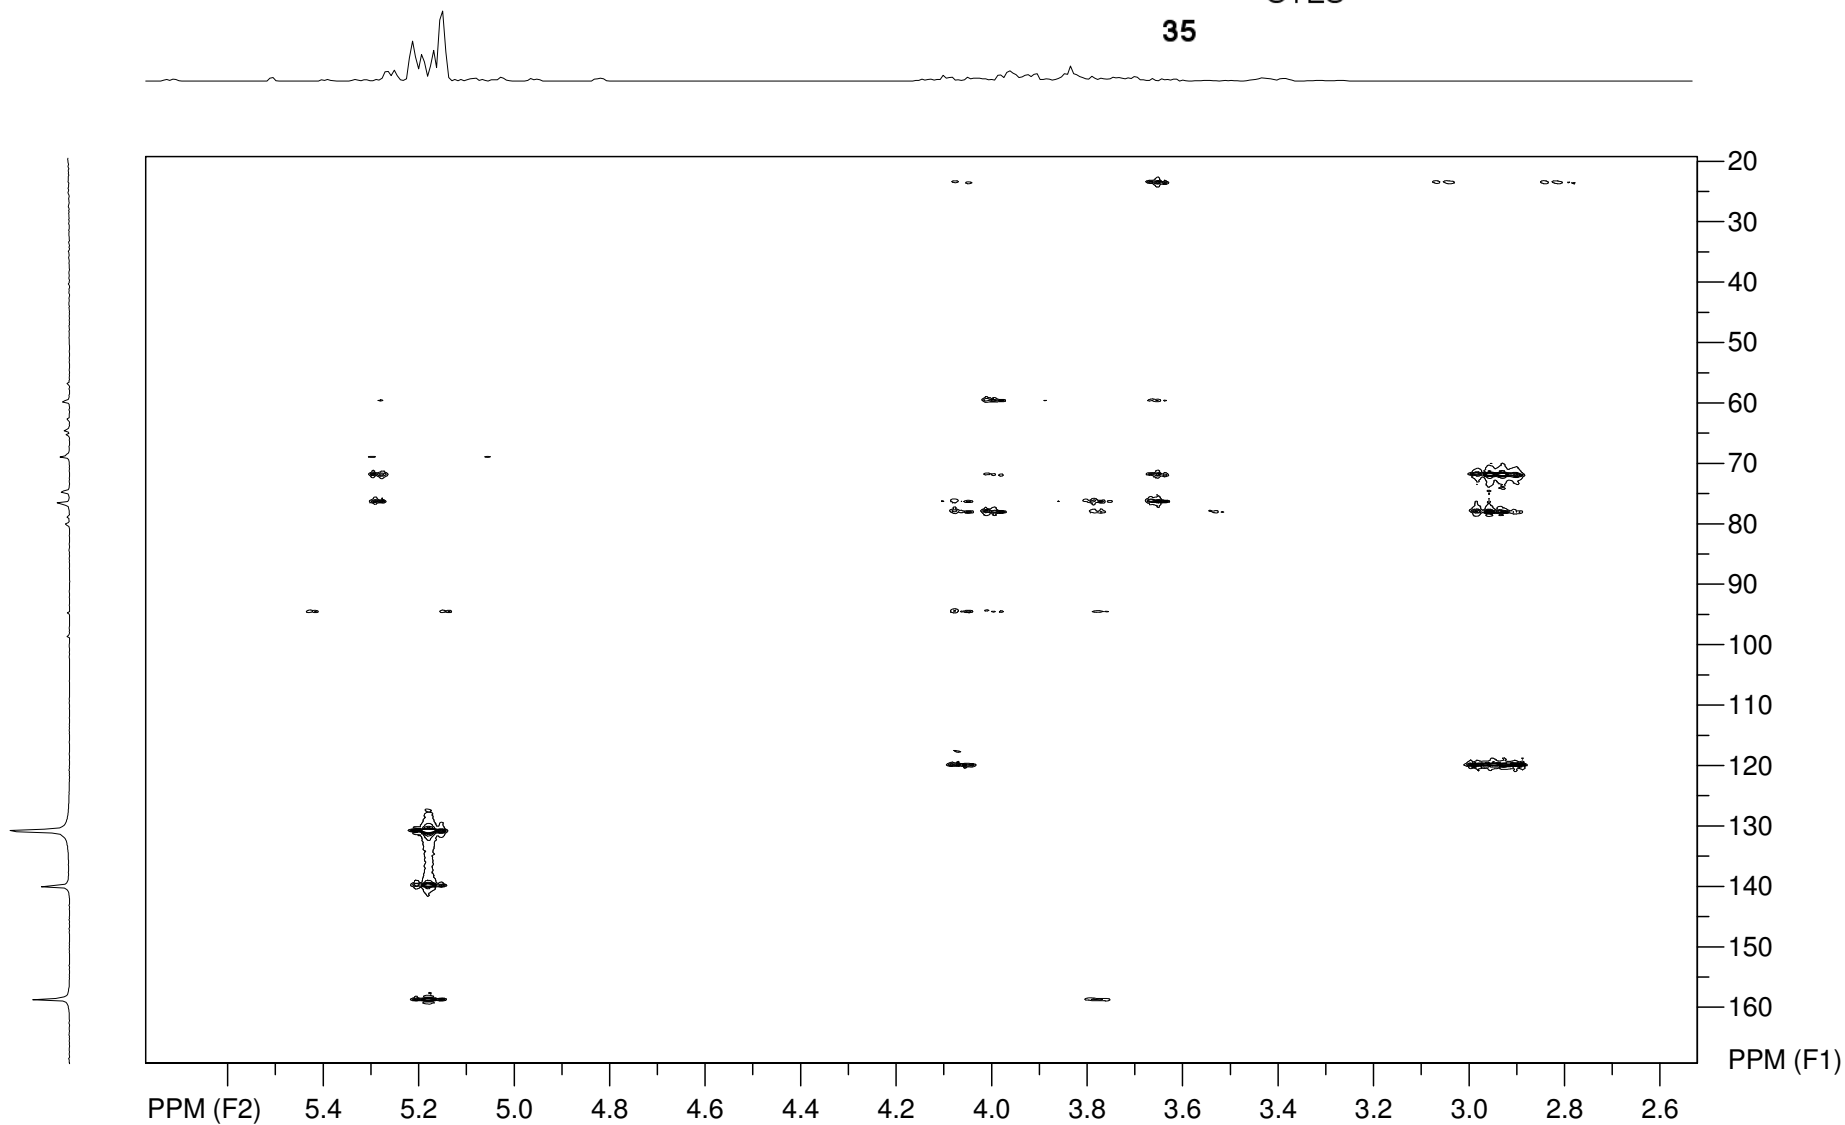

file: C:\Users\Jeff\Documents\NMR Folder\NMR Data\remaining to process\6CNTES3GlcNZ\_HMBC\_F2:tfreq. of 0 ppm: 600.549962 MHz  
transmitter freq.: 600.553783 MHz  
time domain size: 4096 by 4096 points  
width (F2): 7812.45 Hz = 13.008827 ppm = 1.907336 Hz/pt  
number of scans: 2

processed size: 2048 complex points  
window function: Sine  
shift: 0.0 degrees  
Hz/cm: 95.211 ppm/cm: 0.15854

F1: freq. of 0 ppm: 151.008006 MHz  
processed size: 1024 complex points  
window function: Sine  
shift: 0.0 degrees  
Hz/cm: 1888.301 ppm/cm: 12.50336

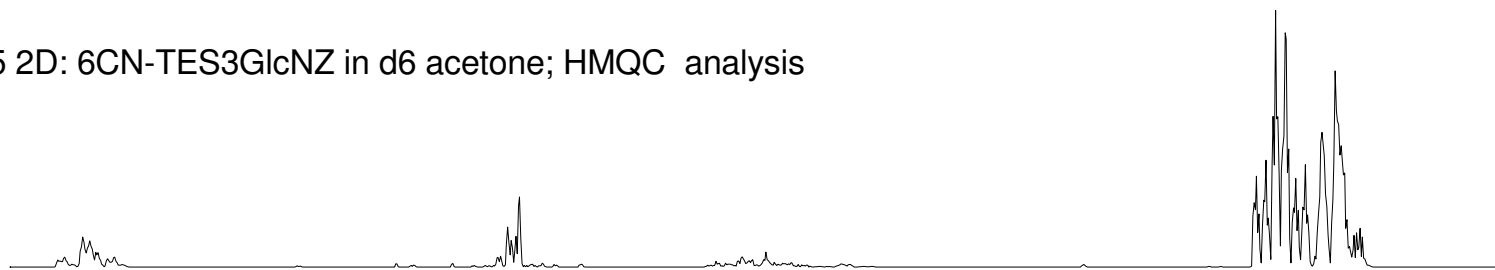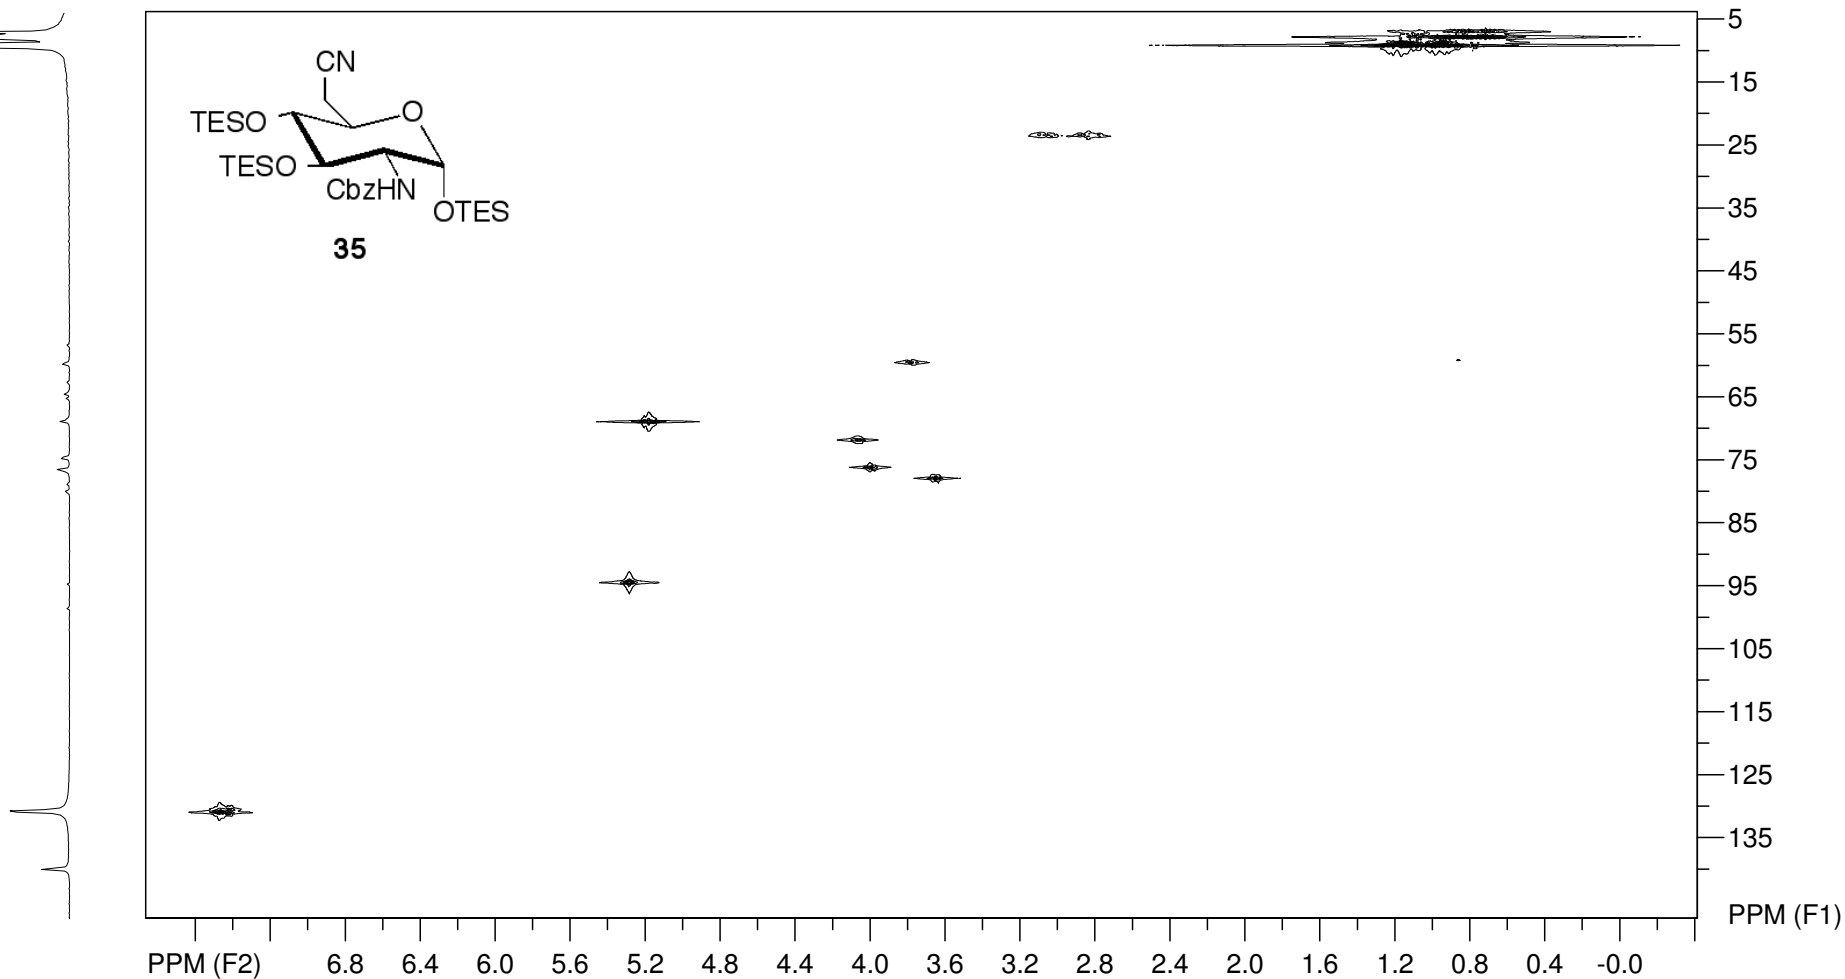

file: C:\Users\Jeff\Documents\NMR Folder\NMR Data\remaining to process\6CNTES3GlcNZ\_HMQCaF2;.freq. of 0 ppm: 600.549962 MHz  
transmitter freq.: 600.552721 MHz  
time domain size: 4096 by 4096 points  
width (F2): 6067.93 Hz = 10.103961 ppm = 1.481429 Hz/pt  
number of scans: 2

processed size: 1024 complex points  
window function: Sine Squared  
shift: 90.0 degrees  
Hz/cm: 242.536 ppm/cm: 0.40385

F1: freq. of 0 ppm: 151.008006 MHz  
processed size: 1024 complex points  
window function: Sine Squared  
shift: 90.0 degrees  
Hz/cm: 1812.123 ppm/cm: 11.99895

|               |                      |             |                      |                 |              |                        |                       |
|---------------|----------------------|-------------|----------------------|-----------------|--------------|------------------------|-----------------------|
| Sample Name   | Jeff 24              | Position    | Vial 24              | Instrument Name | Instrument 1 | User Name              | DYL                   |
| Inj Vol       | 1                    | InjPosition |                      | SampleType      | Unknown      | IRM Calibration Status | Success               |
| Data Filename | Direct_Vial 24_Jeff. | ACQ Method  | Direct_small mol_Jef | Comment         |              | Acquired Time          | 8/17/2012 12:27:48 PM |

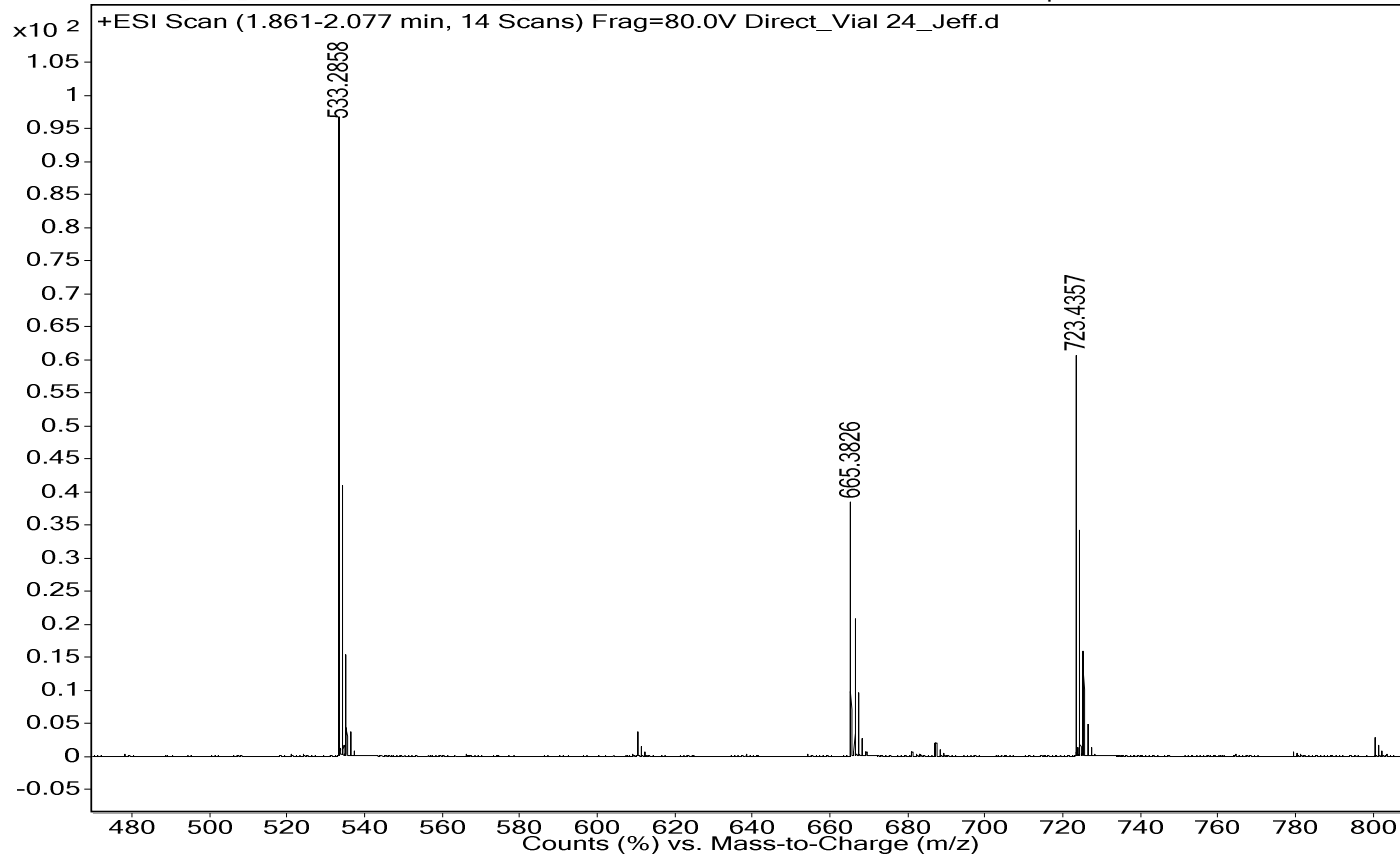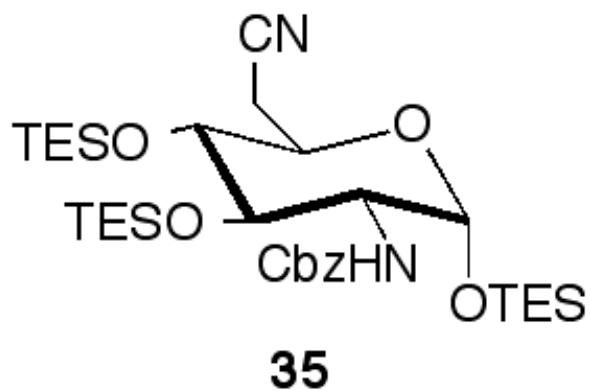

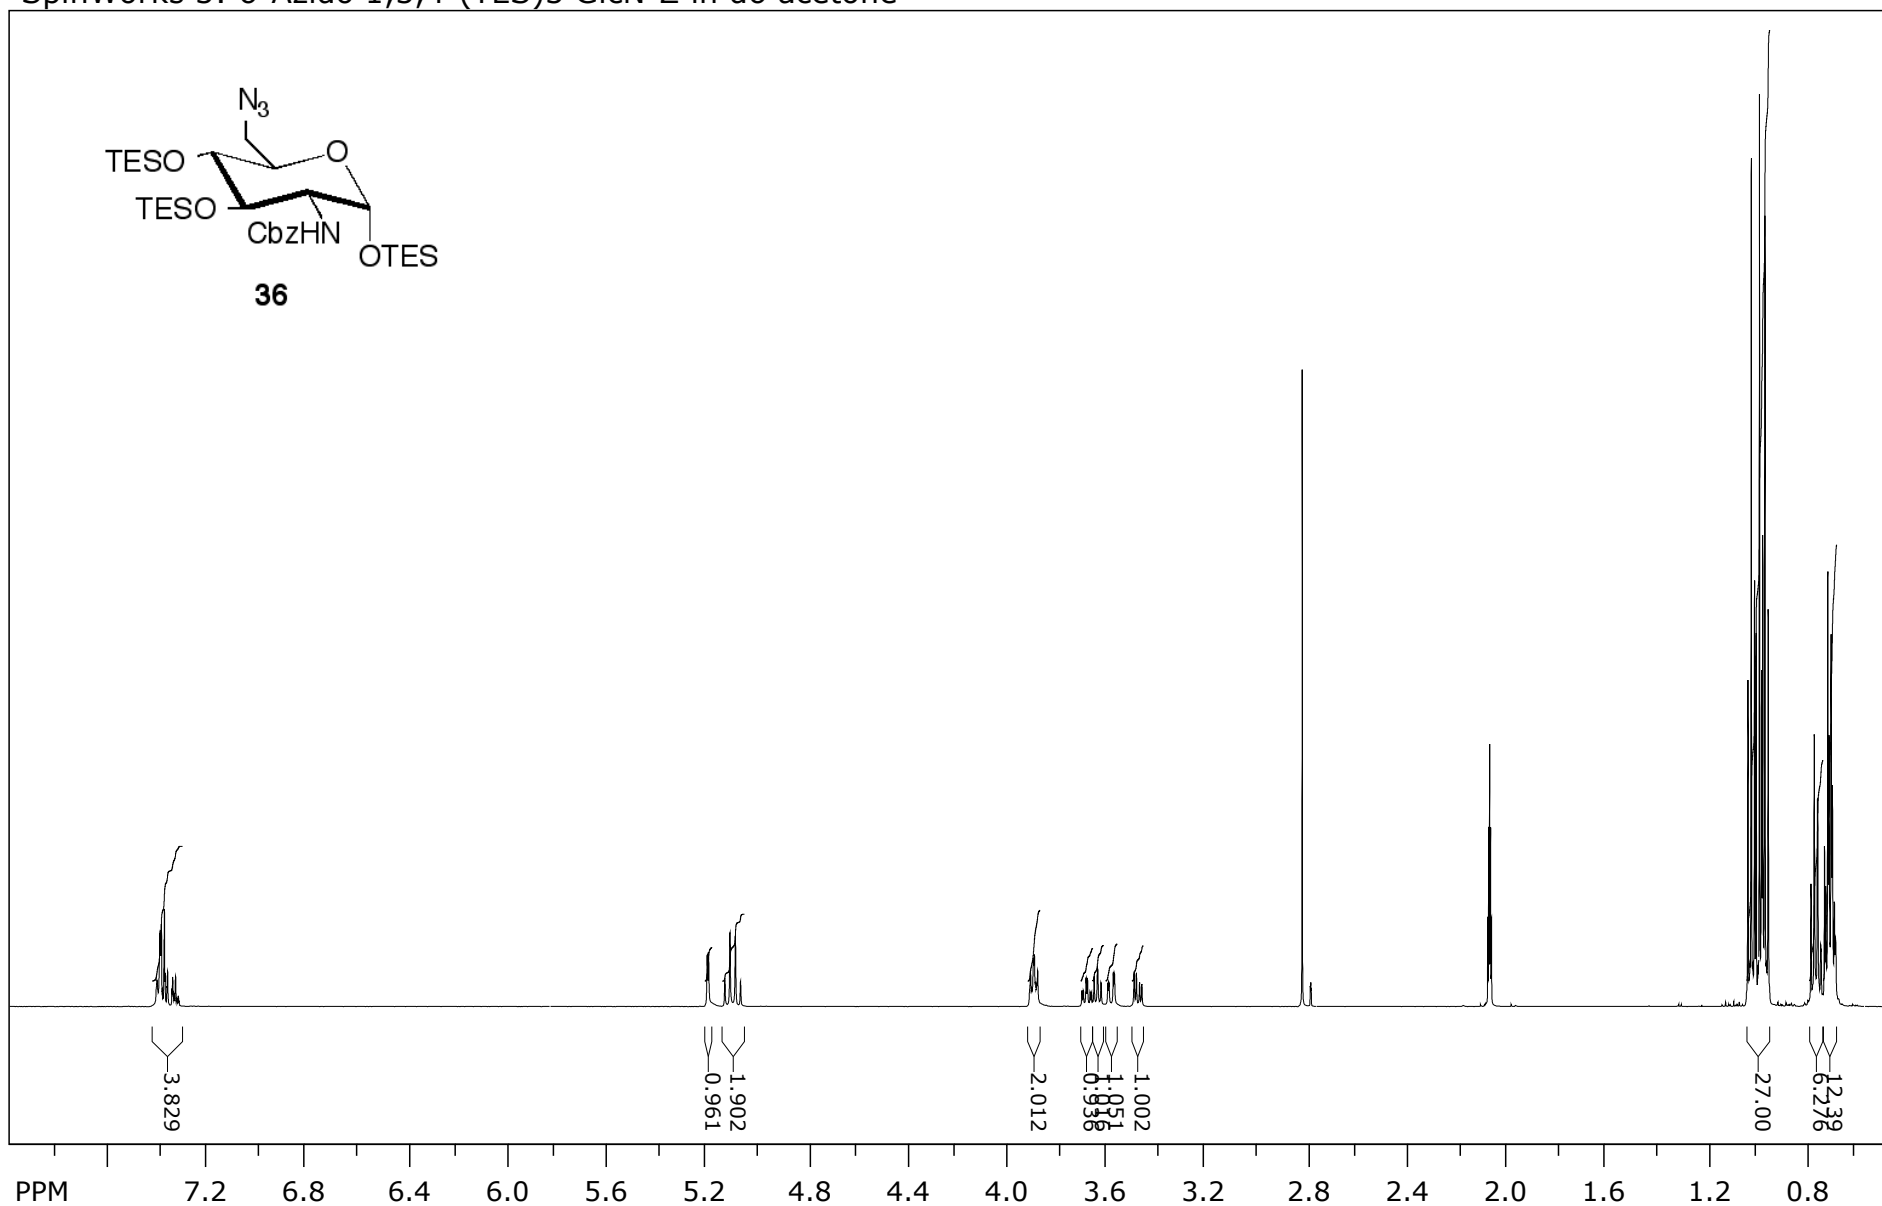

file: ...ng to process\6N3TES3NZ\_acet\1\fid expt: <zgpr>  
transmitter freq.: 600.553538 MHz  
time domain size: 65536 points  
width: 7211.54 Hz = 12.0082 ppm = 0.110039 Hz/pt  
number of scans: 32

freq. of 0 ppm: 600.550010 MHz  
processed size: 262144 complex points  
LB: 0.000 GF: 0.0000  
Hz/cm: 181.576 ppm/cm: 0.30235

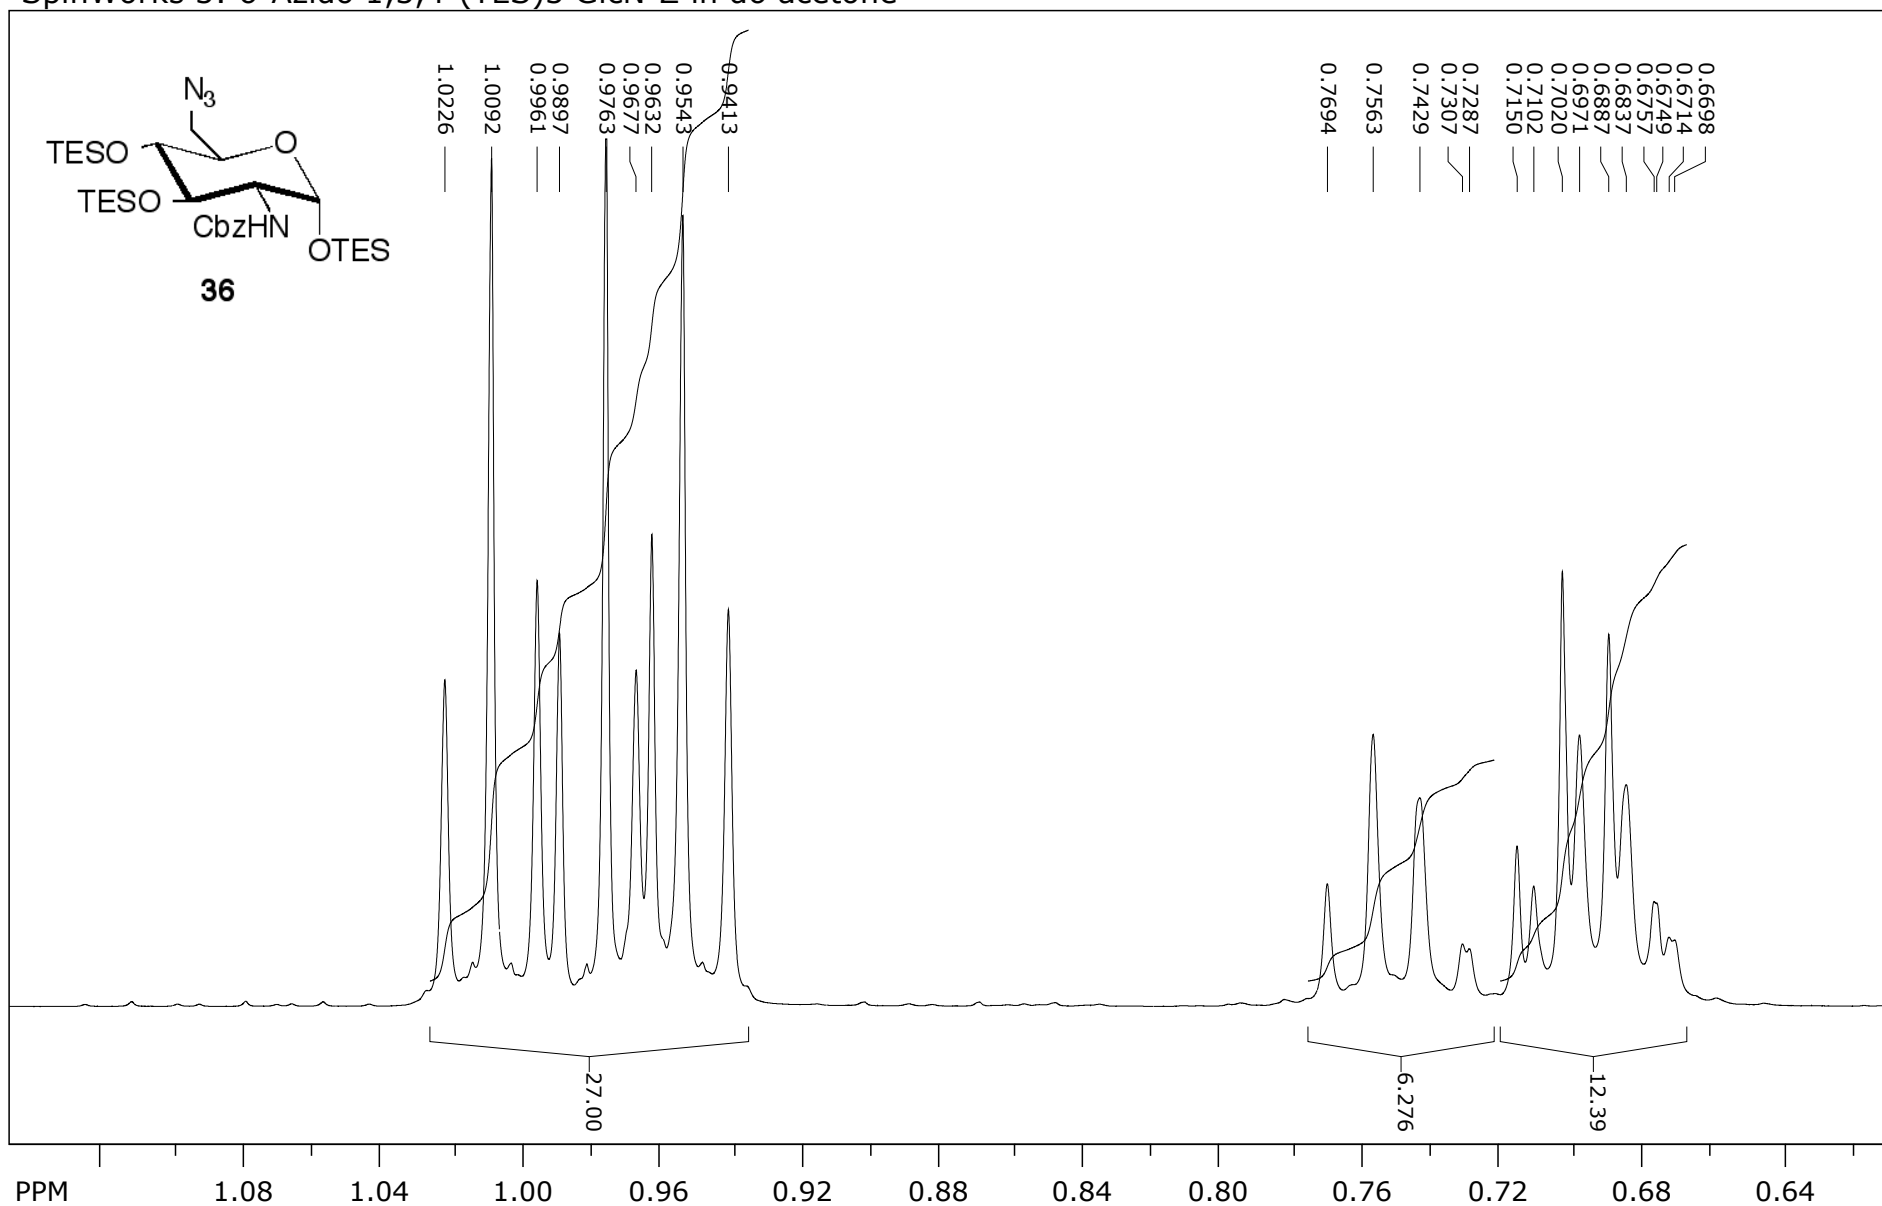

file: ...ng to process\6N3TES3NZ\_acet\1\fid expt: <zgpr>  
transmitter freq.: 600.553538 MHz  
time domain size: 65536 points  
width: 7211.54 Hz = 12.0082 ppm = 0.110039 Hz/pt  
number of scans: 32

freq. of 0 ppm: 600.550010 MHz  
processed size: 262144 complex points  
LB: 0.000 GF: 0.0000  
Hz/cm: 12.970 ppm/cm: 0.02160

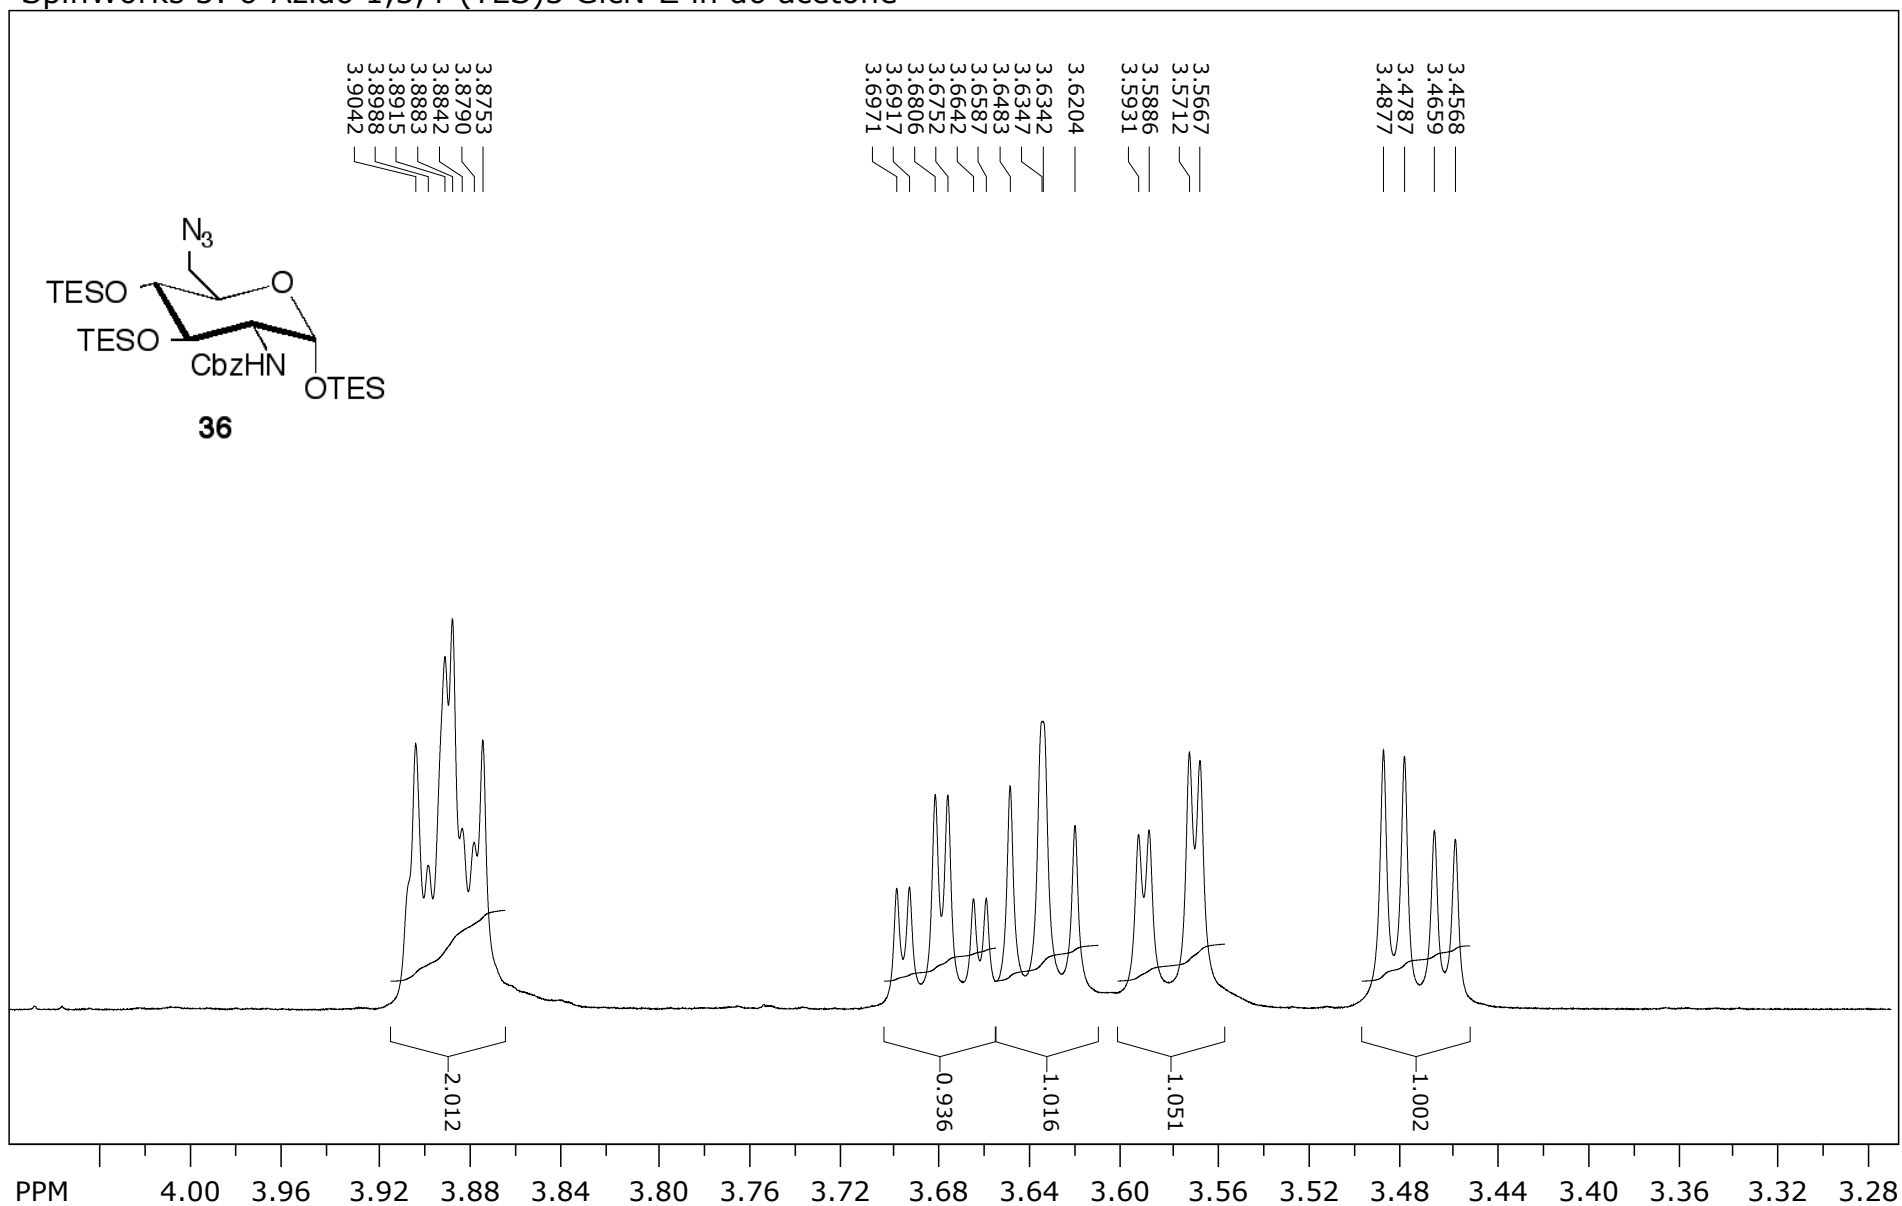

file: ...ng to process\6N3TES3NZ\_acet\1\fid expt: <zgpr>  
 transmitter freq.: 600.553538 MHz  
 time domain size: 65536 points  
 width: 7211.54 Hz = 12.0082 ppm = 0.110039 Hz/pt  
 number of scans: 32

freq. of 0 ppm: 600.550010 MHz  
 processed size: 262144 complex points  
 LB: 0.000 GF: 0.0000  
 Hz/cm: 19.455 ppm/cm: 0.03239



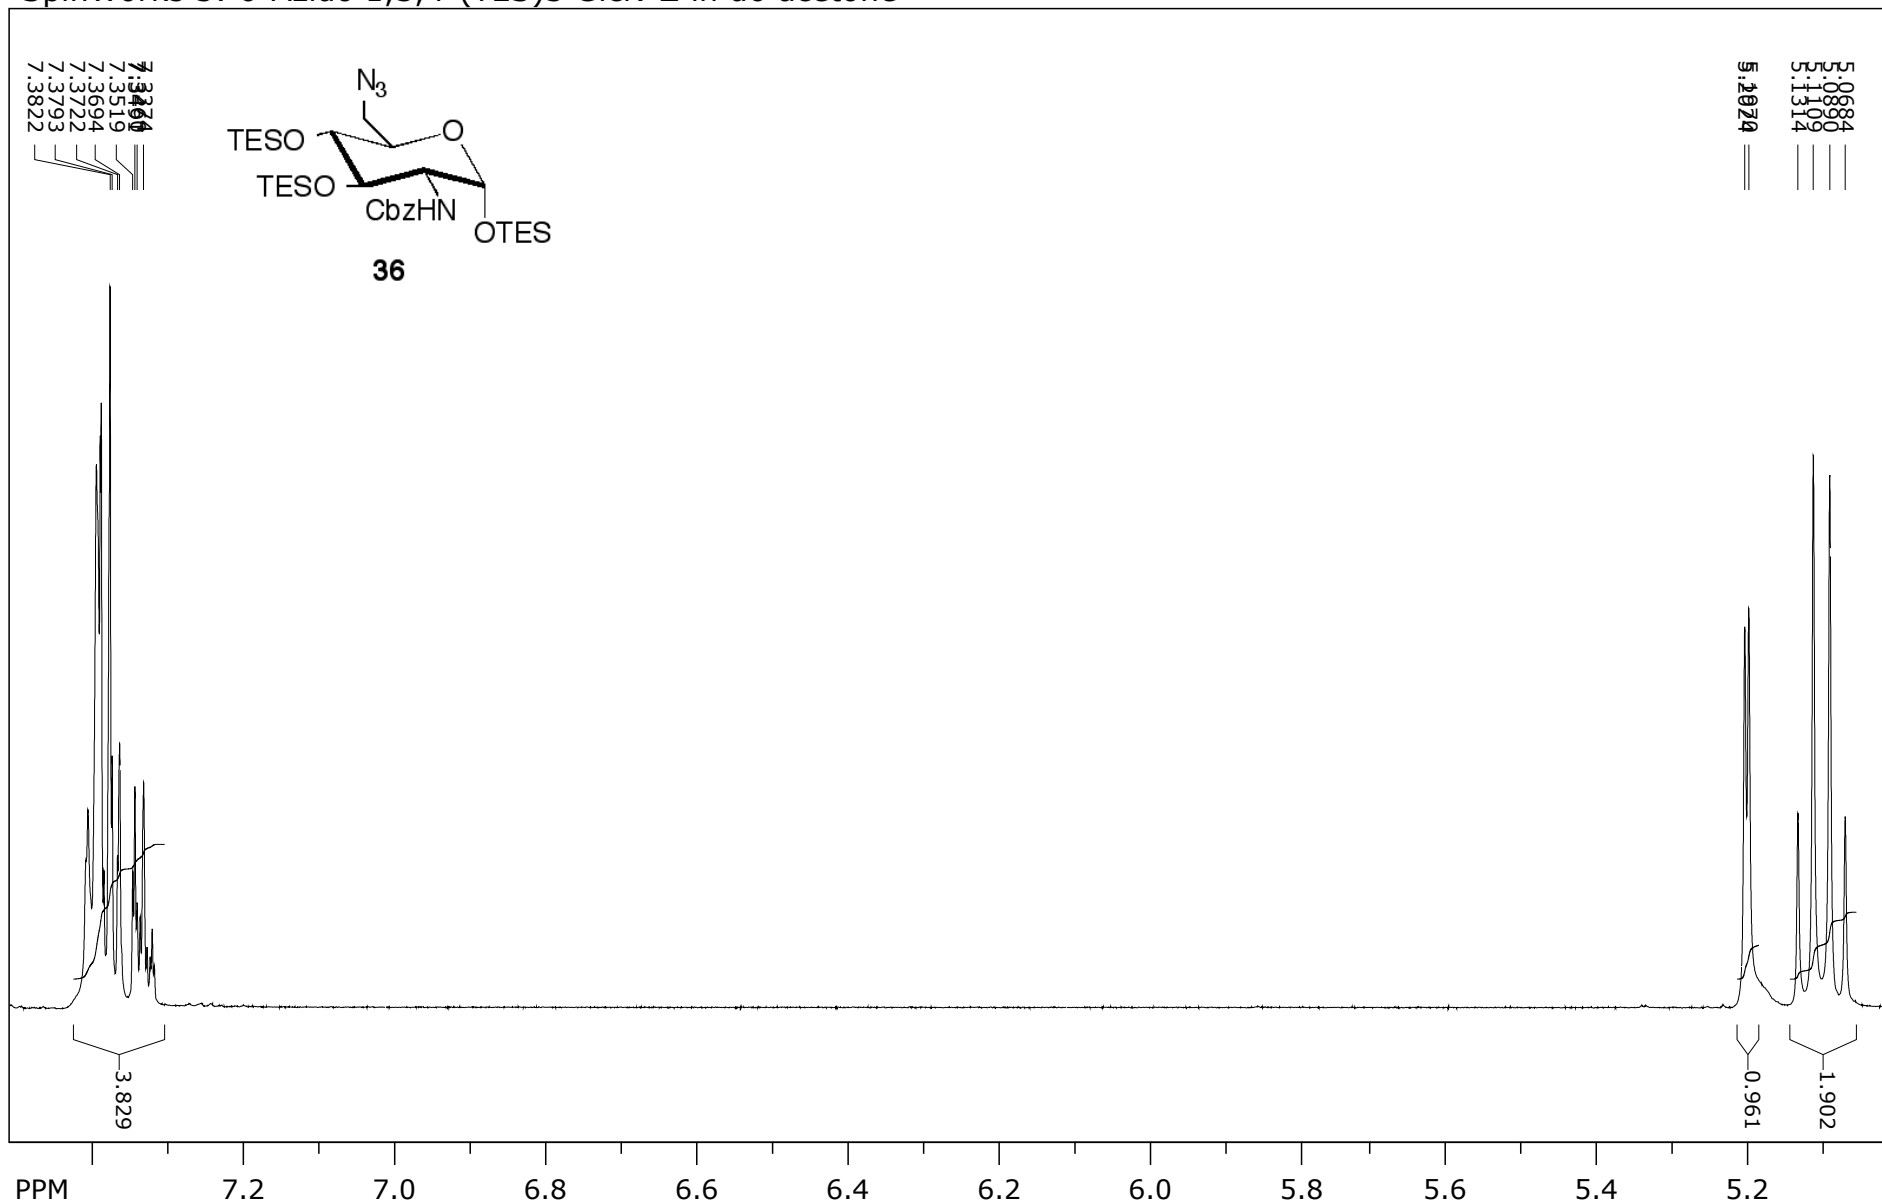

file: ...ng to process\6N3TES3NZ\_acet\1\fid expt: <zgpr>  
transmitter freq.: 600.553538 MHz  
time domain size: 65536 points  
width: 7211.54 Hz = 12.0082 ppm = 0.110039 Hz/pt  
number of scans: 32

freq. of 0 ppm: 600.550010 MHz  
processed size: 262144 complex points  
LB: 0.000 GF: 0.0000  
Hz/cm: 60.289 ppm/cm: 0.10039

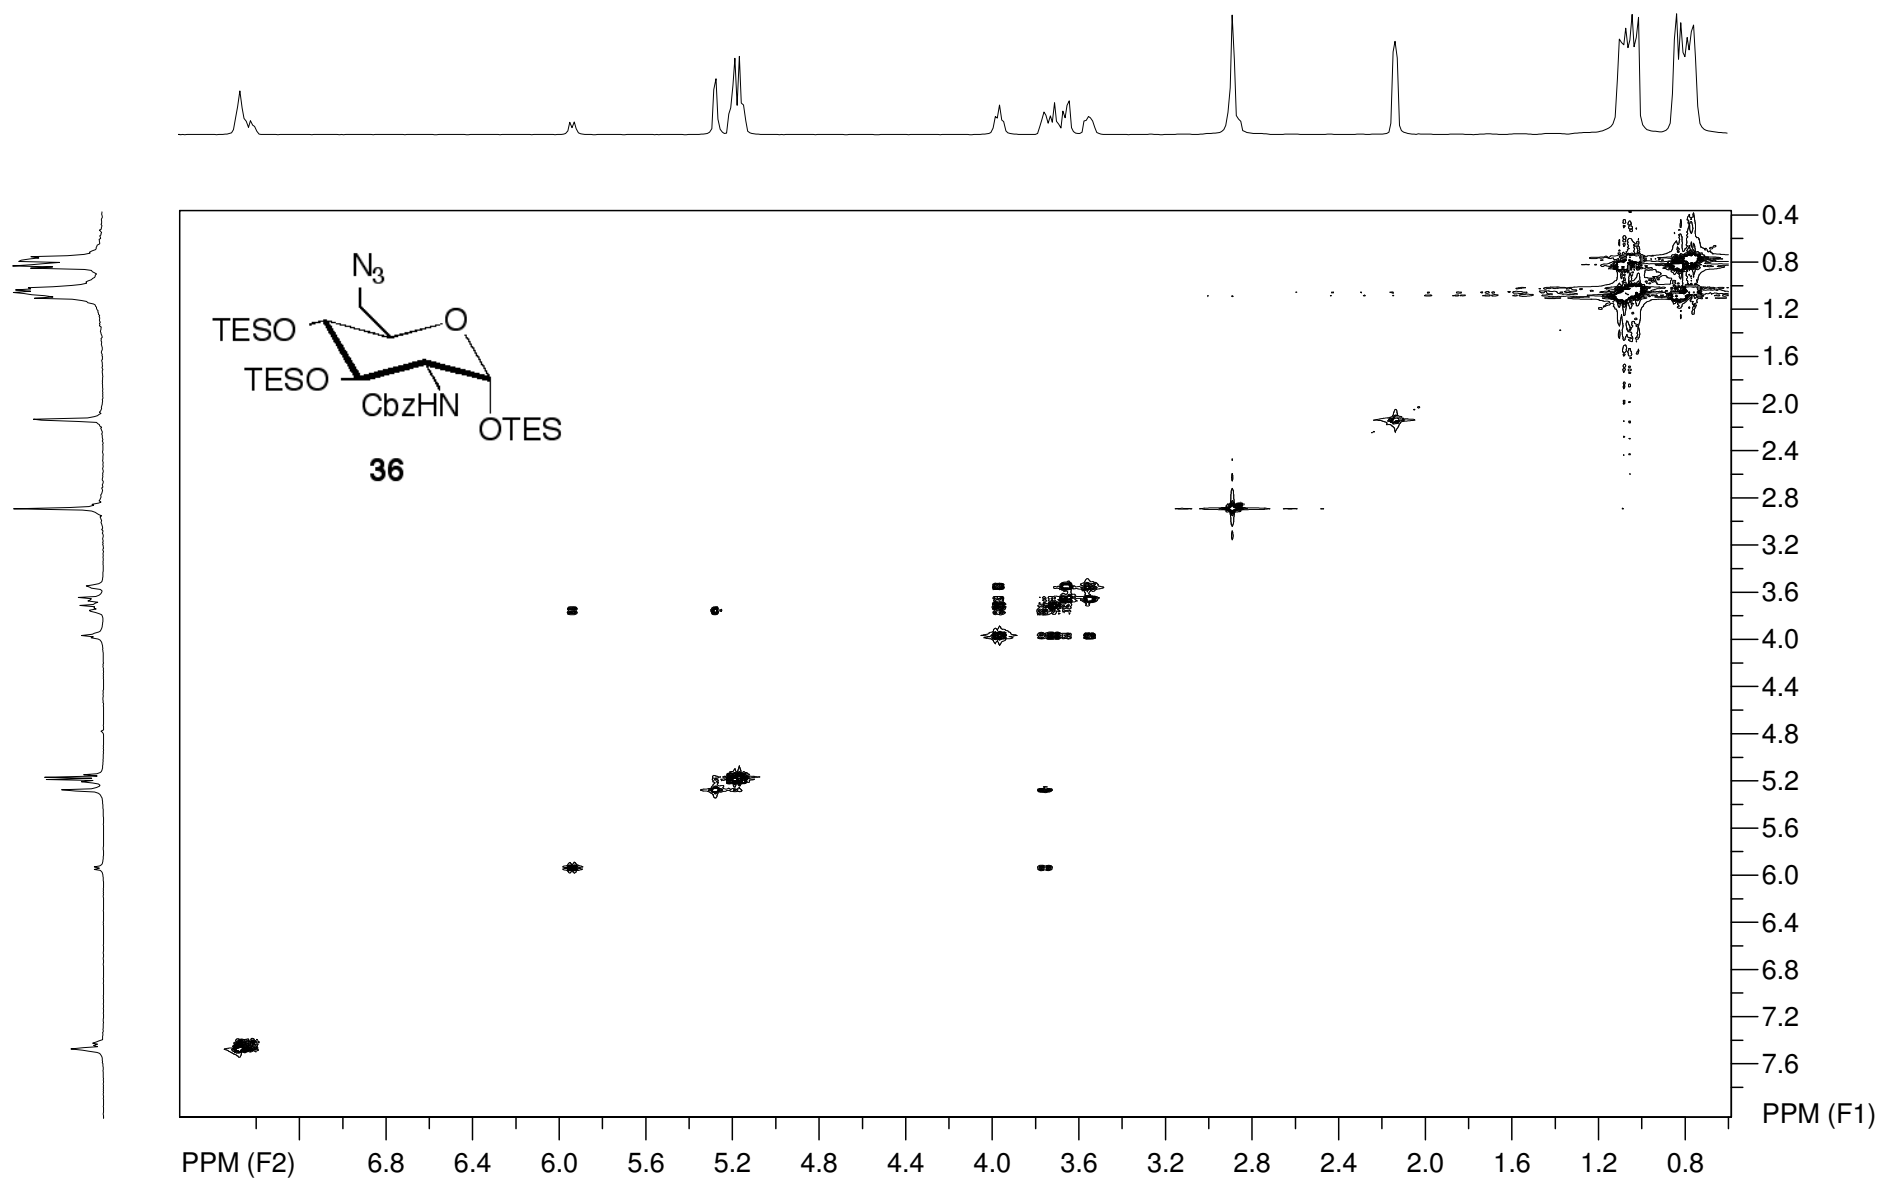

file: C:\Users\Jeff\Documents\NMR Folder\NMR Data\remaining to process\6N3TES3NZ\_COSY\1\serF2.xfreq. of 0 ppm: 600.549962 MHz  
transmitter freq.: 600.552832 MHz  
time domain size: 2048 by 2048 points  
width (F2): 6009.59 Hz = 10.006806 ppm = 2.934368 Hz/pt  
number of scans: 1

processed size: 1024 complex points  
window function: Sine  
shift: 0.0 degrees  
Hz/cm: 209.948 ppm/cm: 0.34959

F1: freq. of 0 ppm: 600.549962 MHz  
processed size: 1024 complex points  
window function: Sine  
shift: 0.0 degrees  
Hz/cm: 384.848 ppm/cm: 0.64082

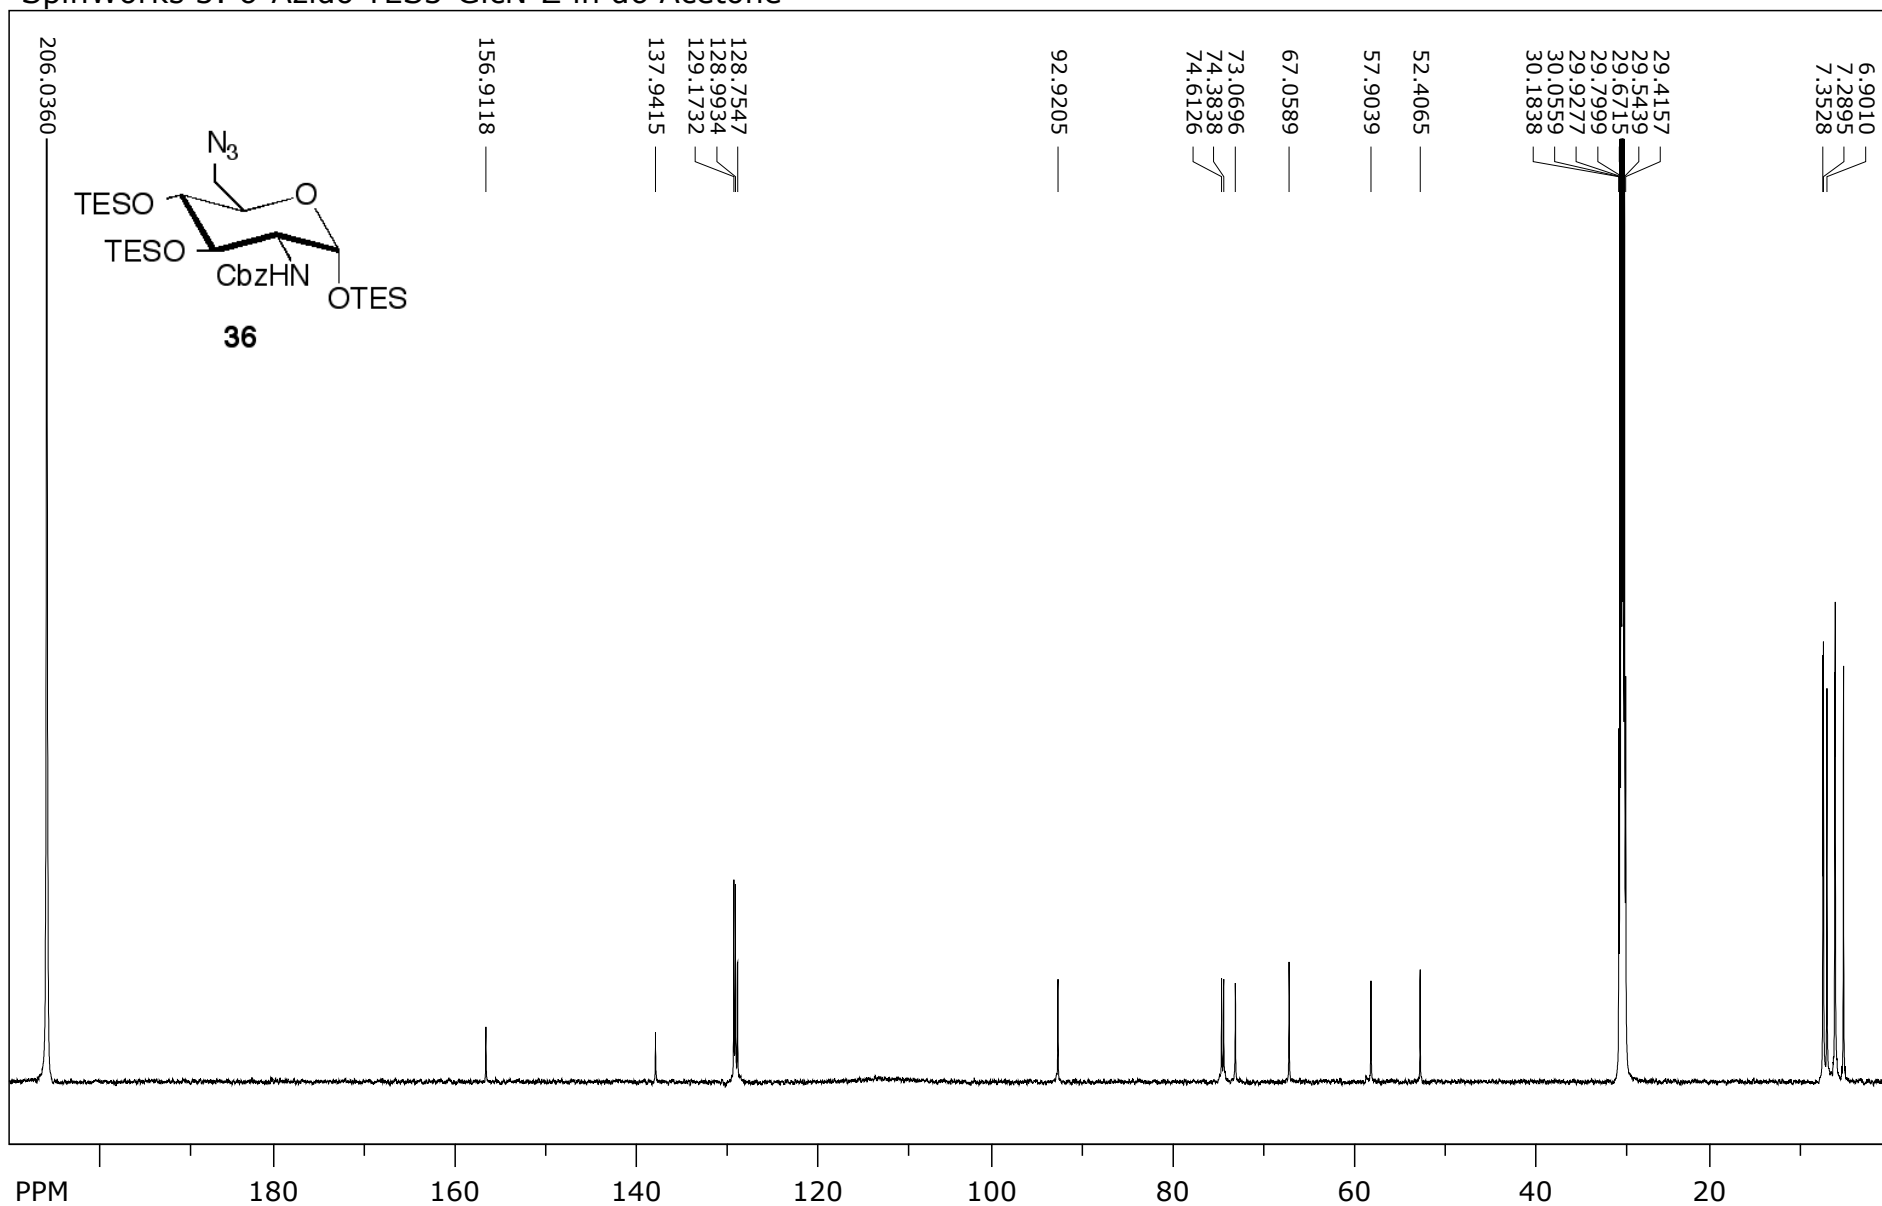

file: ...ing to process\6N3TES3NZ\_13C\1\fid exp: <zpgg30>  
transmitter freq.: 151.023519 MHz  
time domain size: 65536 points  
width: 36057.69 Hz = 238.7555 ppm = 0.550197 Hz/pt  
number of scans: 6144

freq. of 0 ppm: 151.008288 MHz  
processed size: 32768 complex points  
LB: 5.000 GF: 0.0000  
Hz/cm: 1271.678 ppm/cm: 8.42039

|               |                     |             |                      |                 |              |                        |                      |
|---------------|---------------------|-------------|----------------------|-----------------|--------------|------------------------|----------------------|
| Sample Name   | Jeff 23             | Position    | Vial 75              | Instrument Name | Instrument 1 | User Name              | DYL                  |
| Inj Vol       | 1                   | InjPosition |                      | SampleType      | Unknown      | IRM Calibration Status | Success              |
| Data Filename | Direct_no MeOH_Vial | ACQ Method  | Direct_small mol_Jef | Comment         |              | Acquired Time          | 8/21/2012 1:53:31 PM |

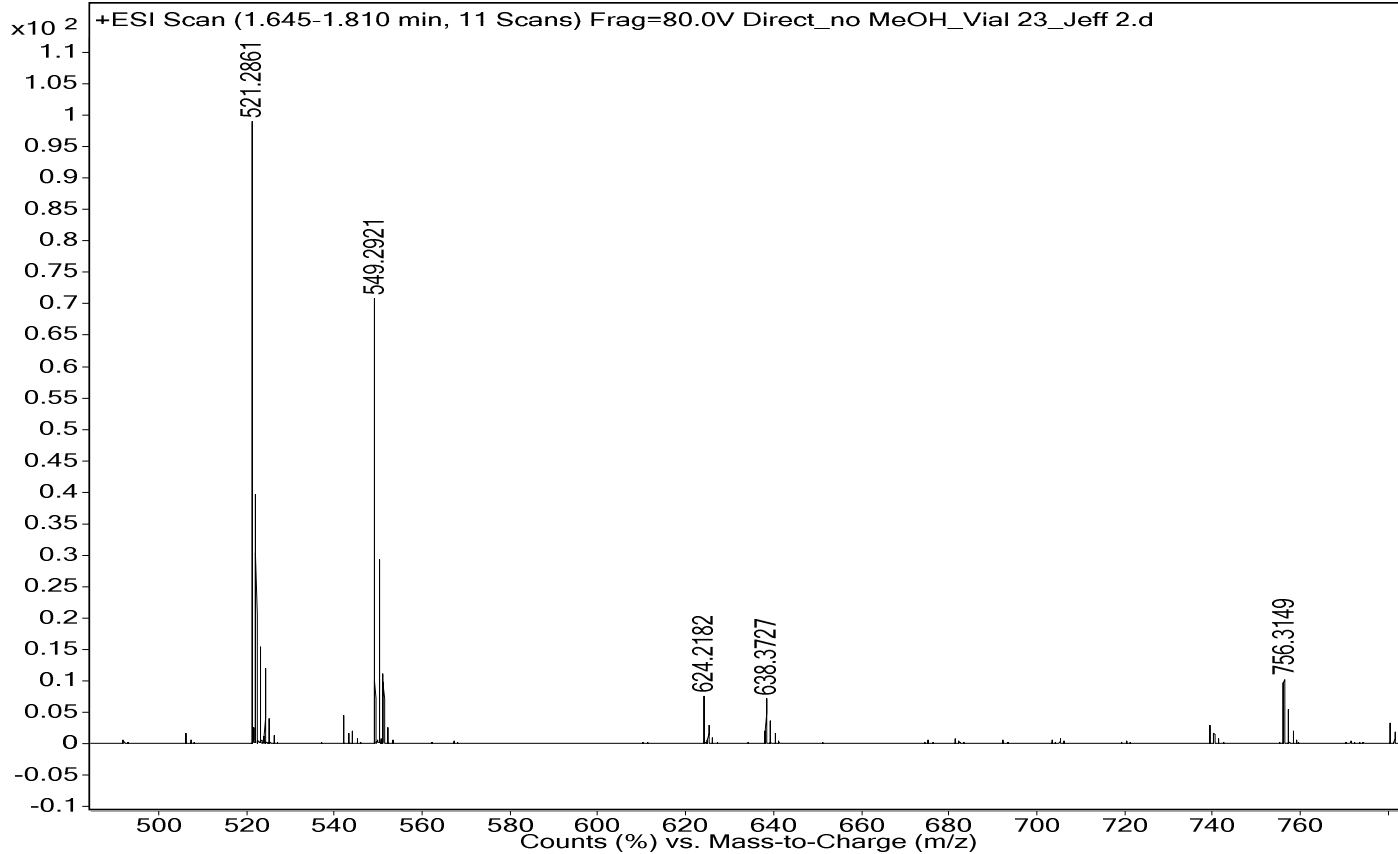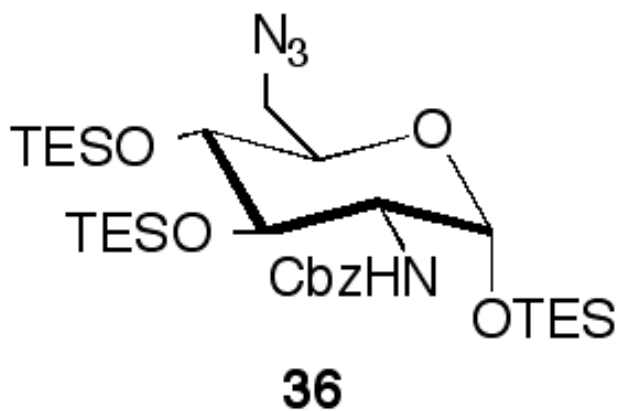

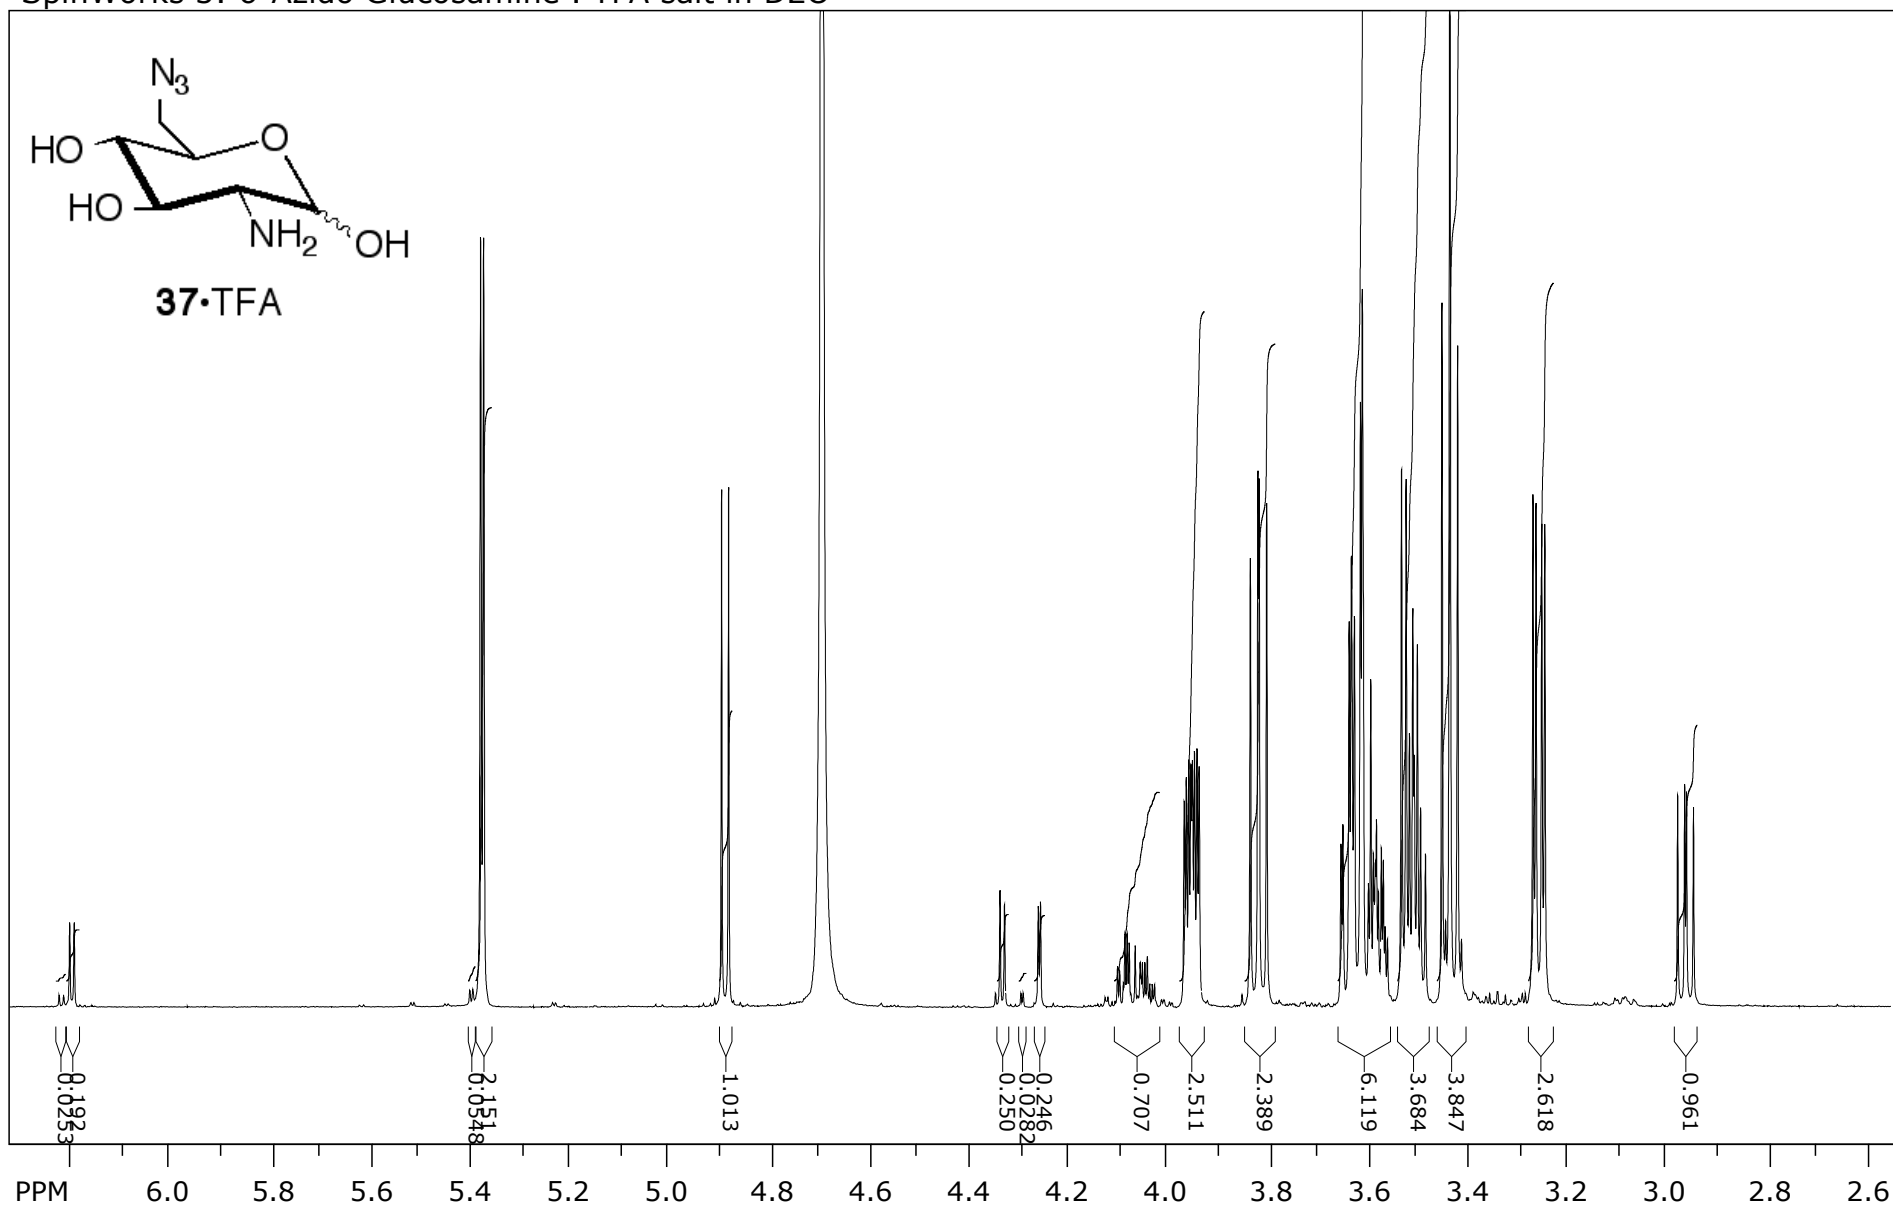

file: ...r\NMR Data\6N3GlcNH2\_TFA\_D2O\1\fid expt: <zgpr>  
transmitter freq.: 600.553538 MHz  
time domain size: 65536 points  
width: 7211.54 Hz = 12.0082 ppm = 0.110039 Hz/pt  
number of scans: 32

freq. of 0 ppm: 600.550010 MHz  
processed size: 262144 complex points  
LB: 0.000 GF: 0.0000  
Hz/cm: 90.949 ppm/cm: 0.15144

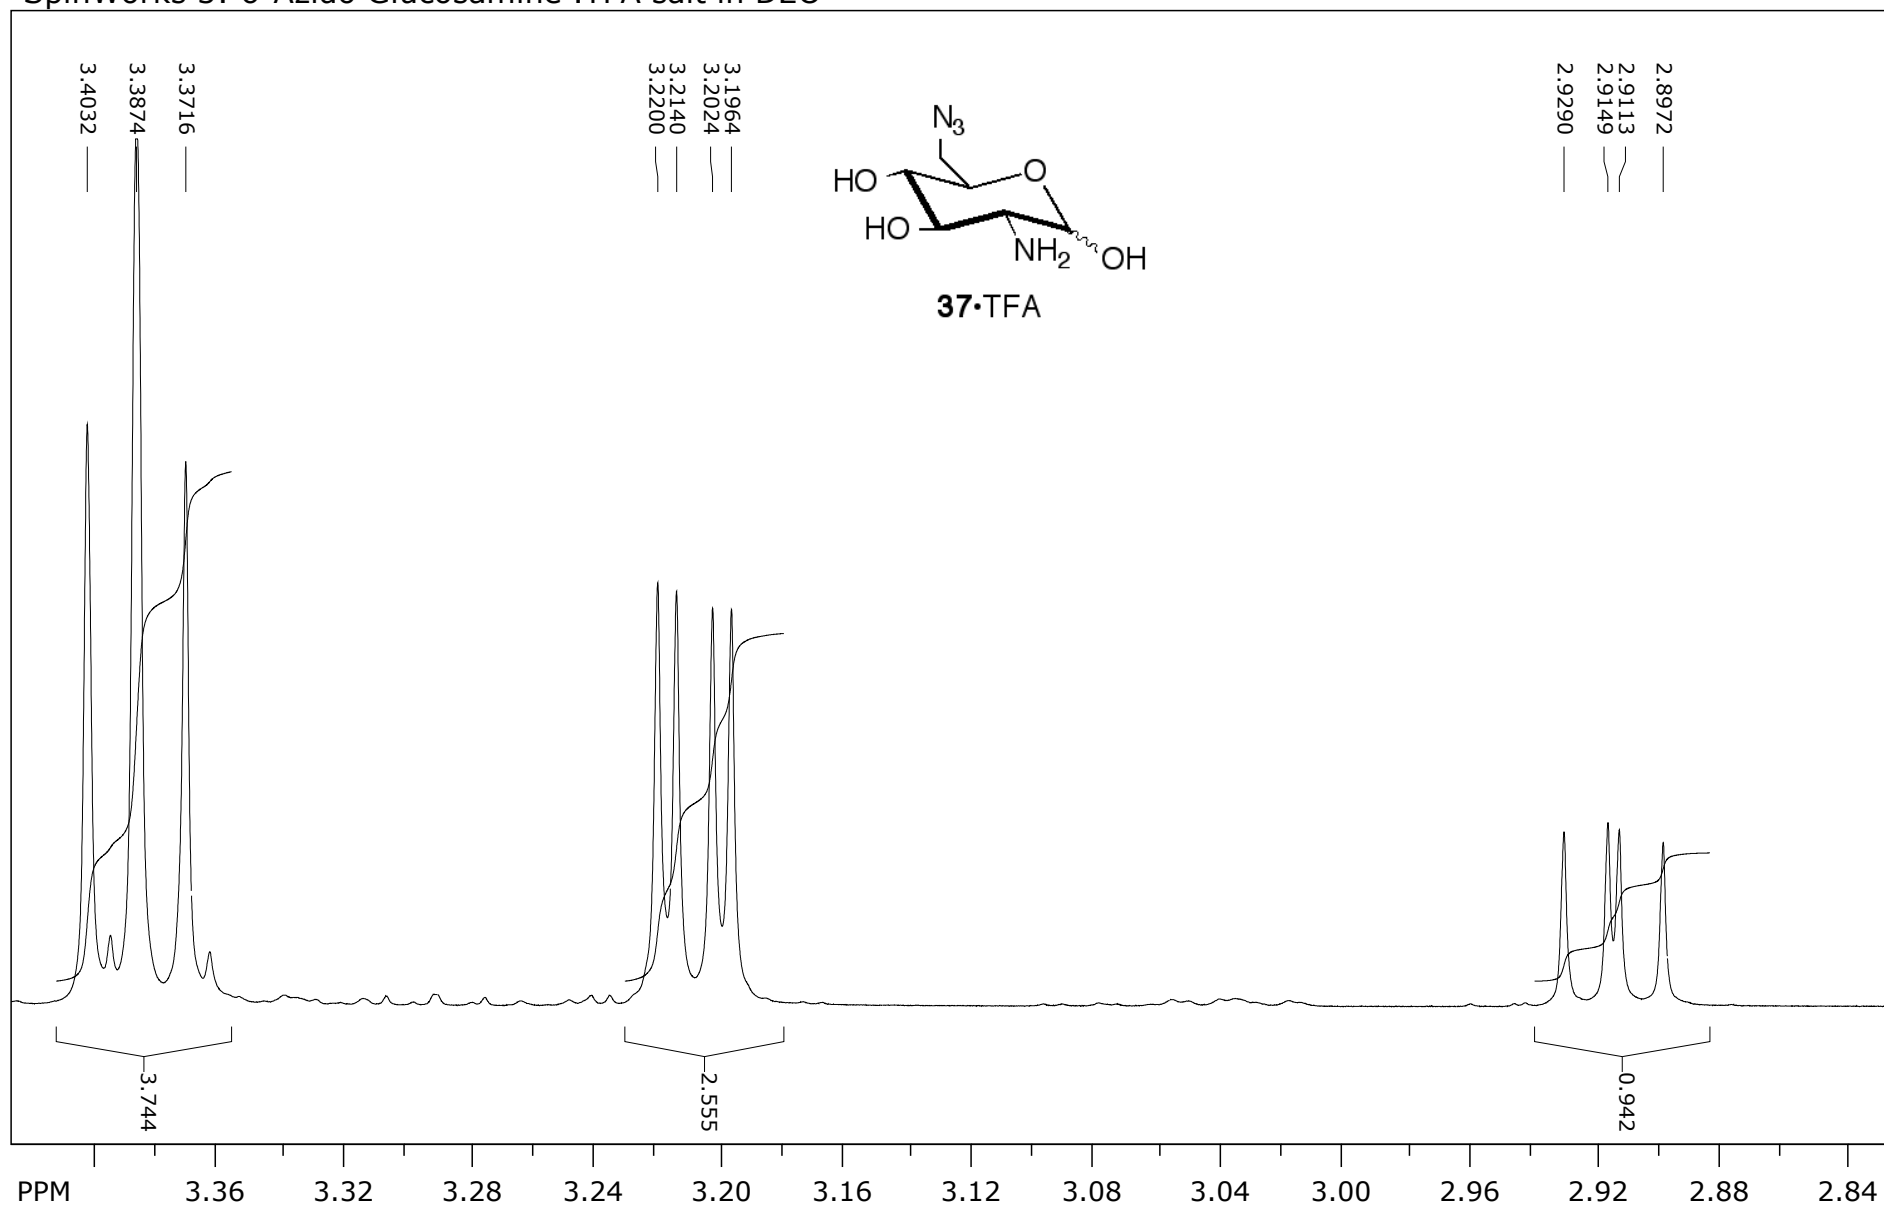

file: ...to process\6N3GlcNH2\_TFA\_D2O\1\fid expt: <zgpr>  
transmitter freq.: 600.553538 MHz  
time domain size: 65536 points  
width: 7211.54 Hz = 12.0082 ppm = 0.110039 Hz/pt  
number of scans: 32

freq. of 0 ppm: 600.550037 MHz  
processed size: 262144 complex points  
LB: 0.000 GF: 0.0000  
Hz/cm: 14.518 ppm/cm: 0.02417

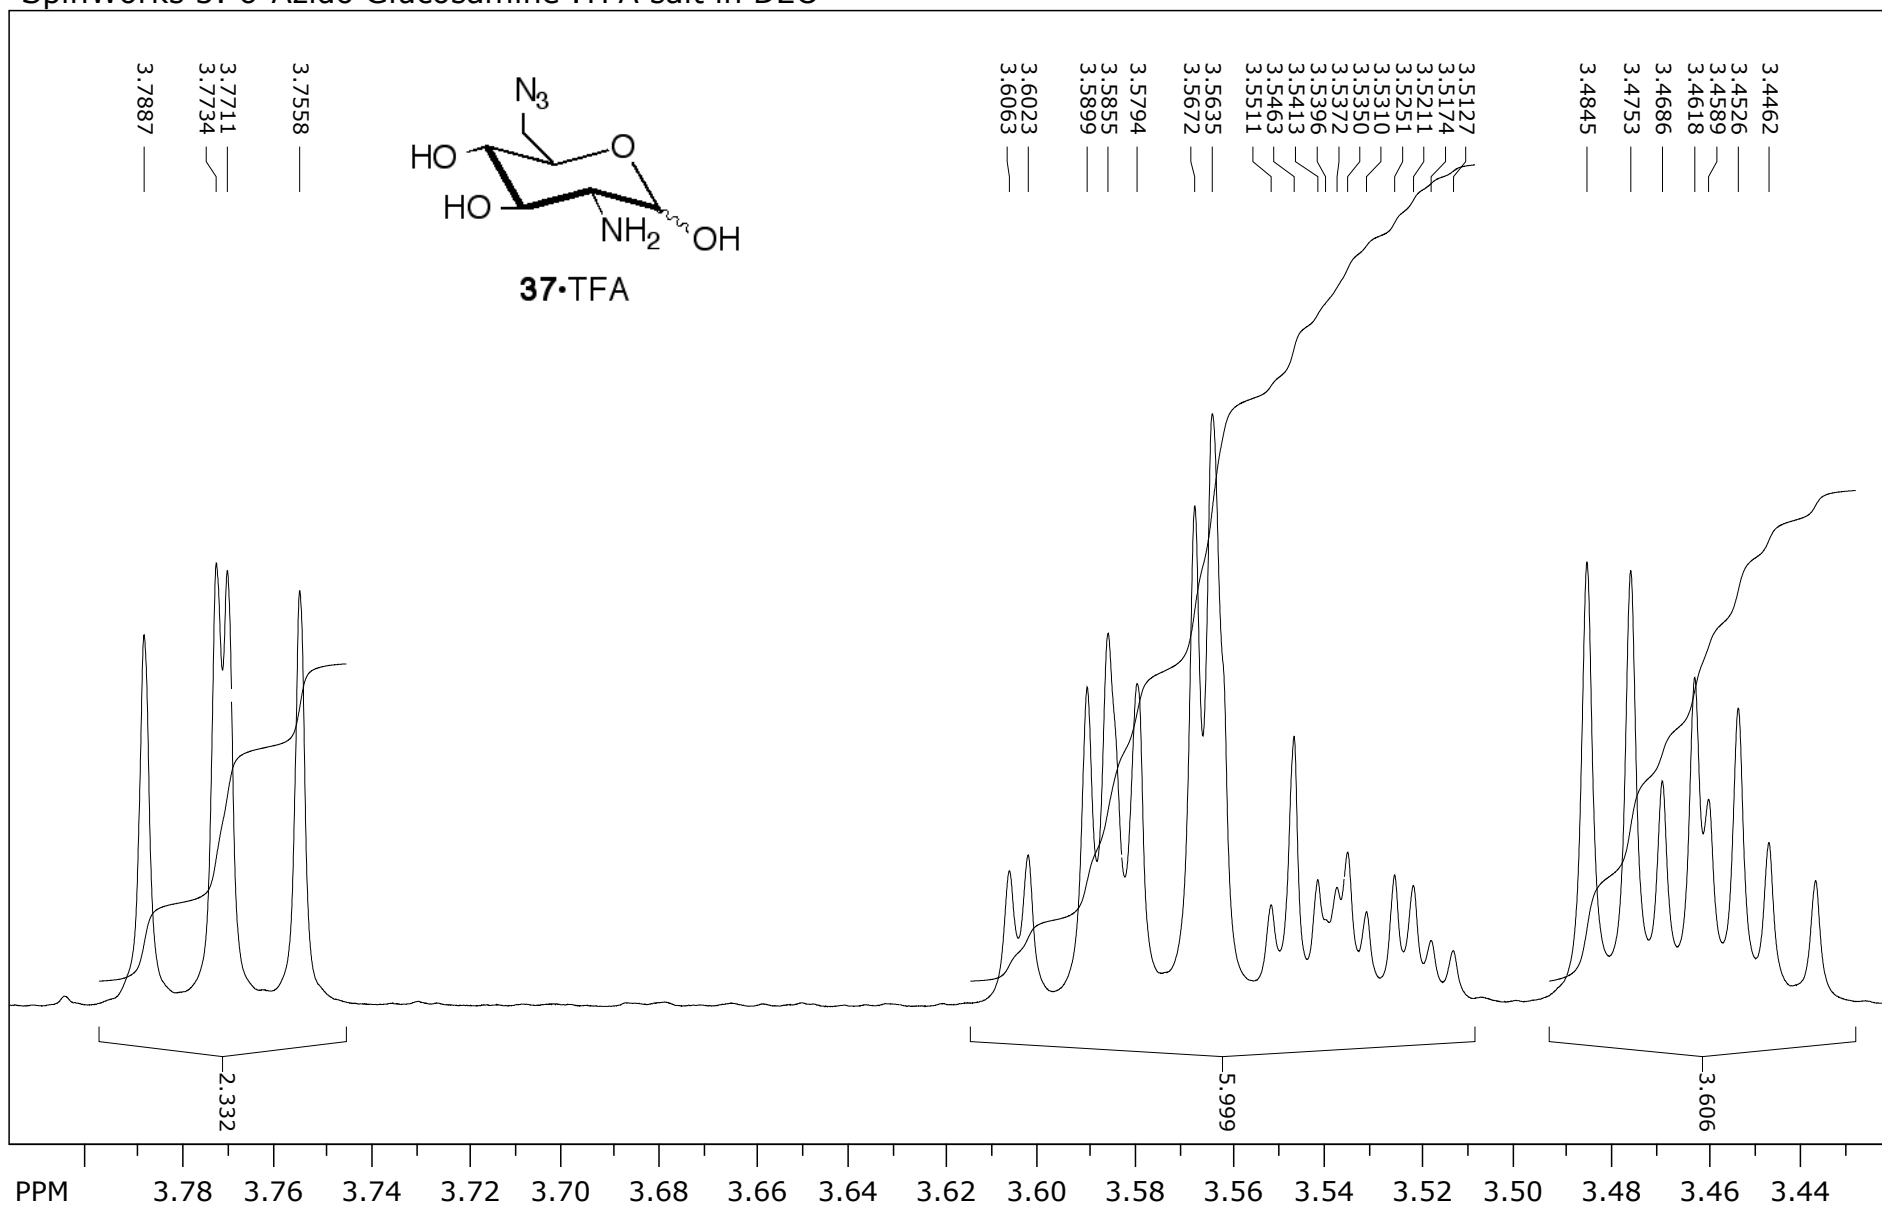

file: ...to process\6N3GlcNH2\_TFA\_D2O\1\fid expt: <zgpr>  
 transmitter freq.: 600.553538 MHz  
 time domain size: 65536 points  
 width: 7211.54 Hz = 12.0082 ppm = 0.110039 Hz/pt  
 number of scans: 32

freq. of 0 ppm: 600.550037 MHz  
 processed size: 262144 complex points  
 LB: 0.000 GF: 0.0000  
 Hz/cm: 9.530 ppm/cm: 0.01587

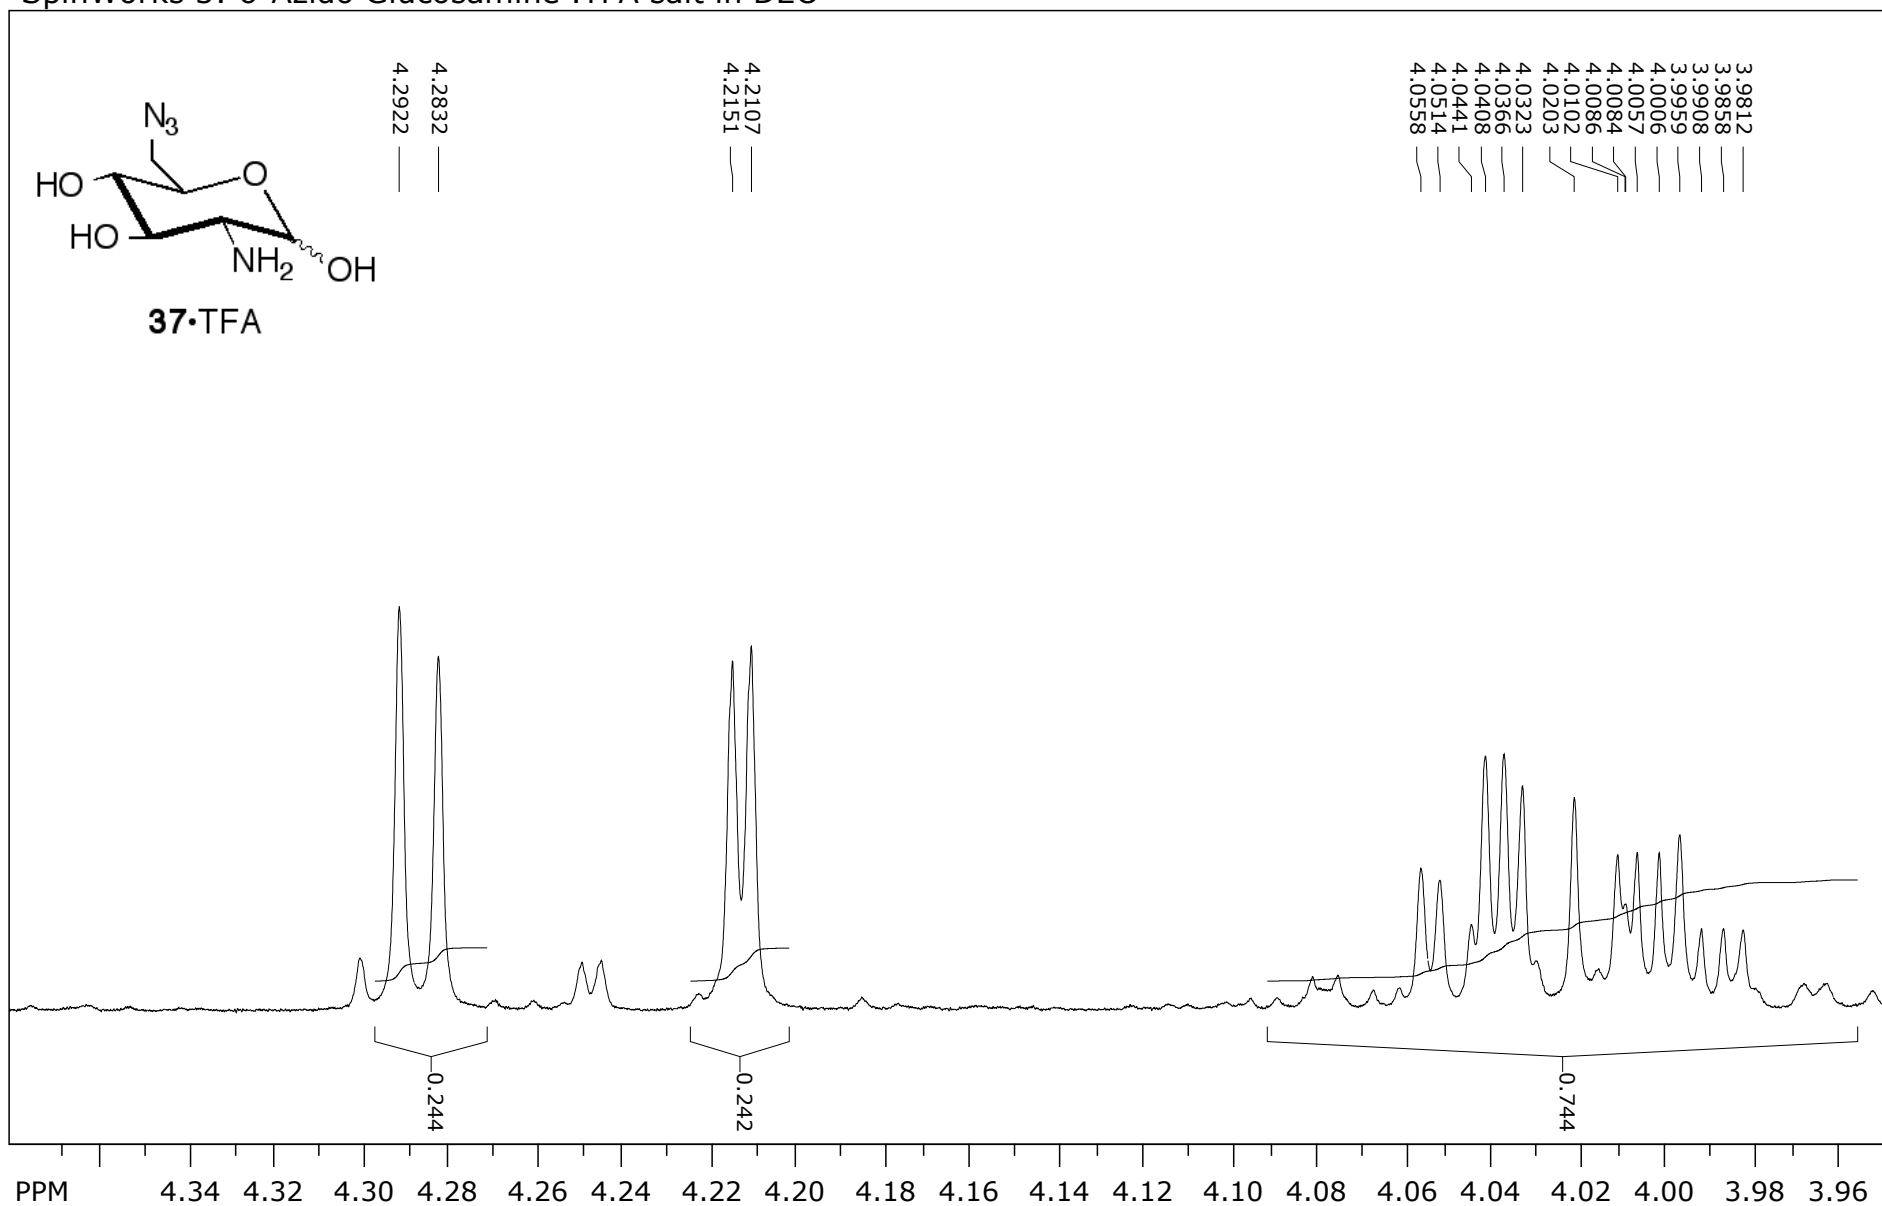

file: ...to process\6N3GlcNH2\_TFA\_D2O\1\fid expt: <zgpr>  
transmitter freq.: 600.553538 MHz  
time domain size: 65536 points  
width: 7211.54 Hz = 12.0082 ppm = 0.110039 Hz/pt  
number of scans: 32

freq. of 0 ppm: 600.550037 MHz  
processed size: 262144 complex points  
LB: 0.000 GF: 0.0000  
Hz/cm: 10.463 ppm/cm: 0.01742



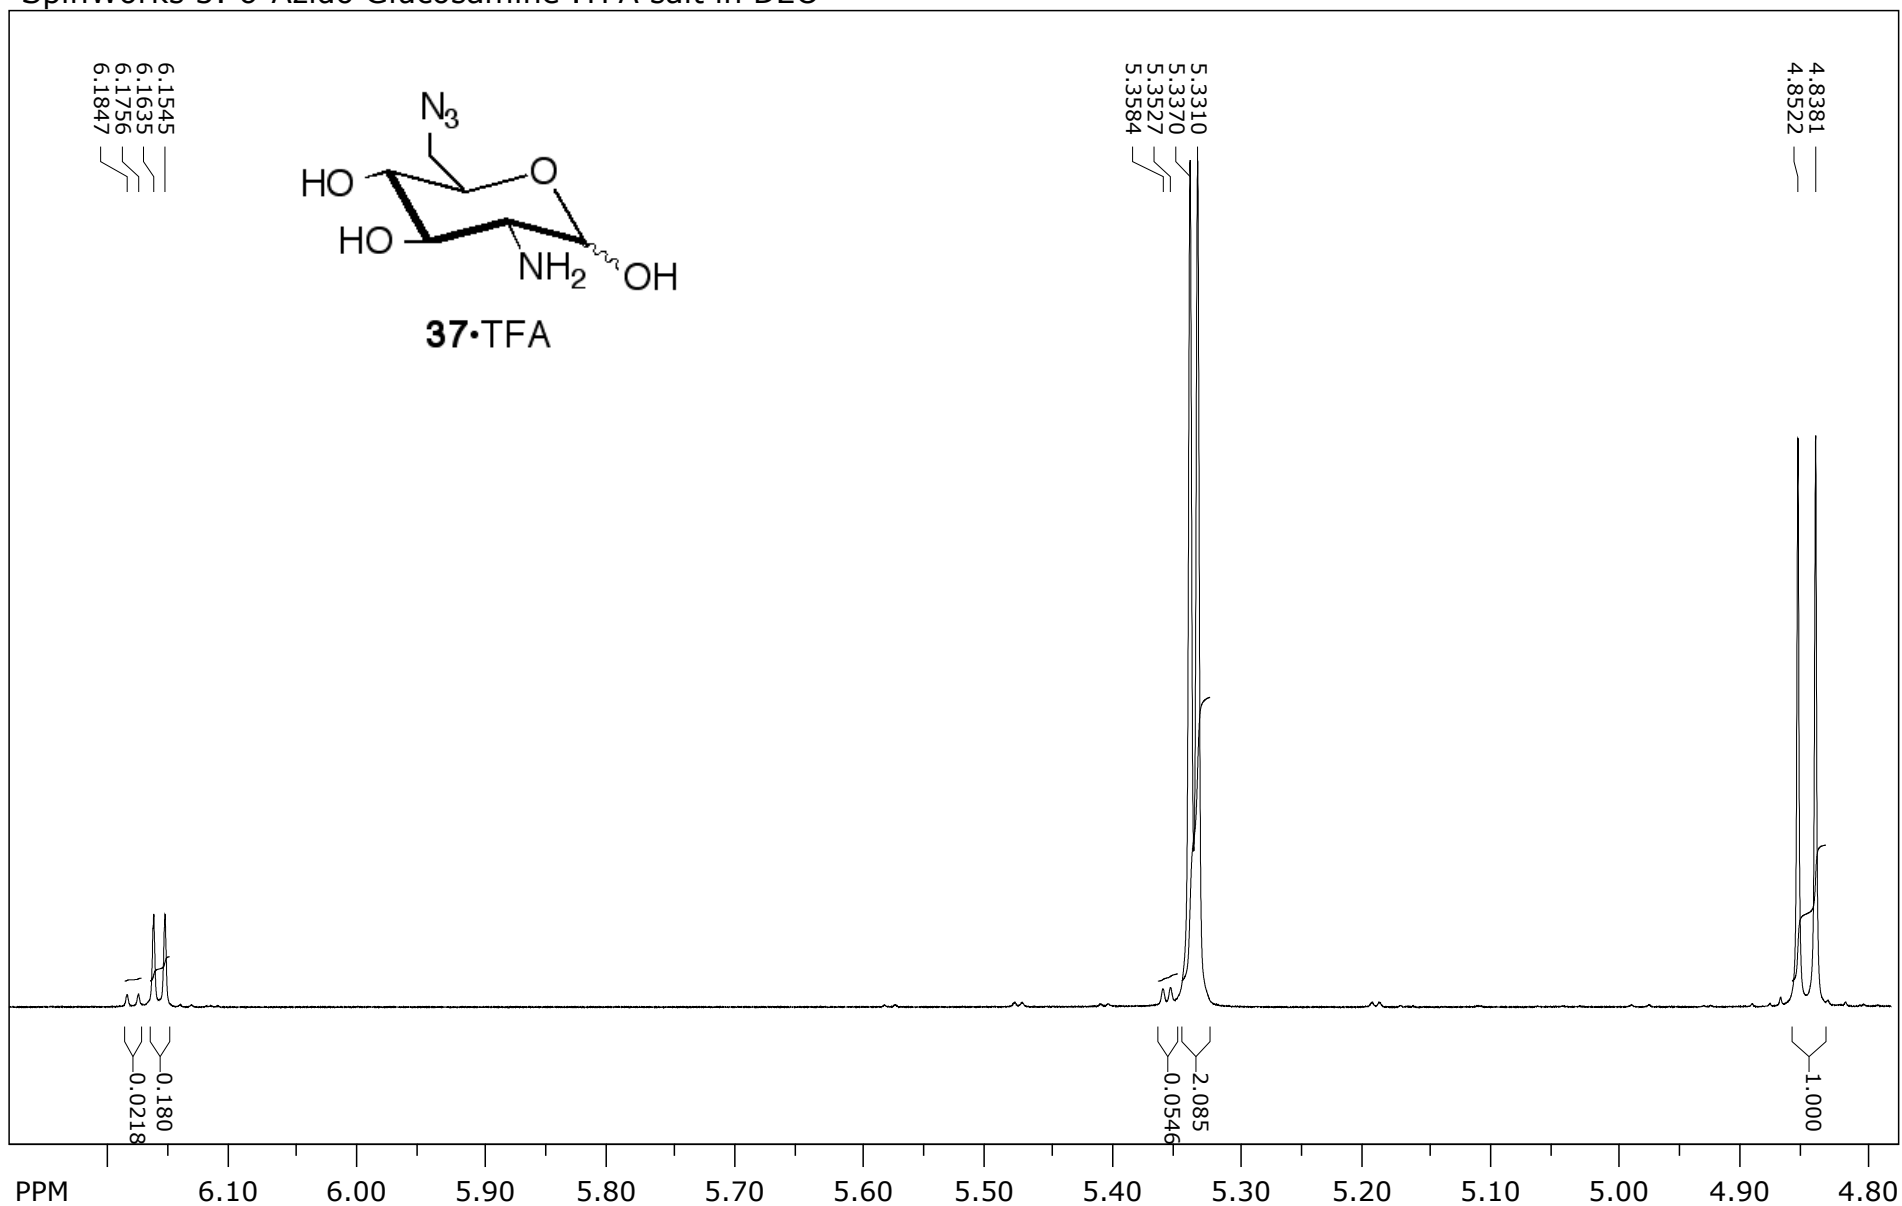

file: ...to process\6N3GlcNH2\_TFA\_D2O\1\fid expt: <zgpr>  
transmitter freq.: 600.553538 MHz  
time domain size: 65536 points  
width: 7211.54 Hz = 12.0082 ppm = 0.110039 Hz/pt  
number of scans: 32

freq. of 0 ppm: 600.550037 MHz  
processed size: 262144 complex points  
LB: 0.000 GF: 0.0000  
Hz/cm: 36.058 ppm/cm: 0.06004

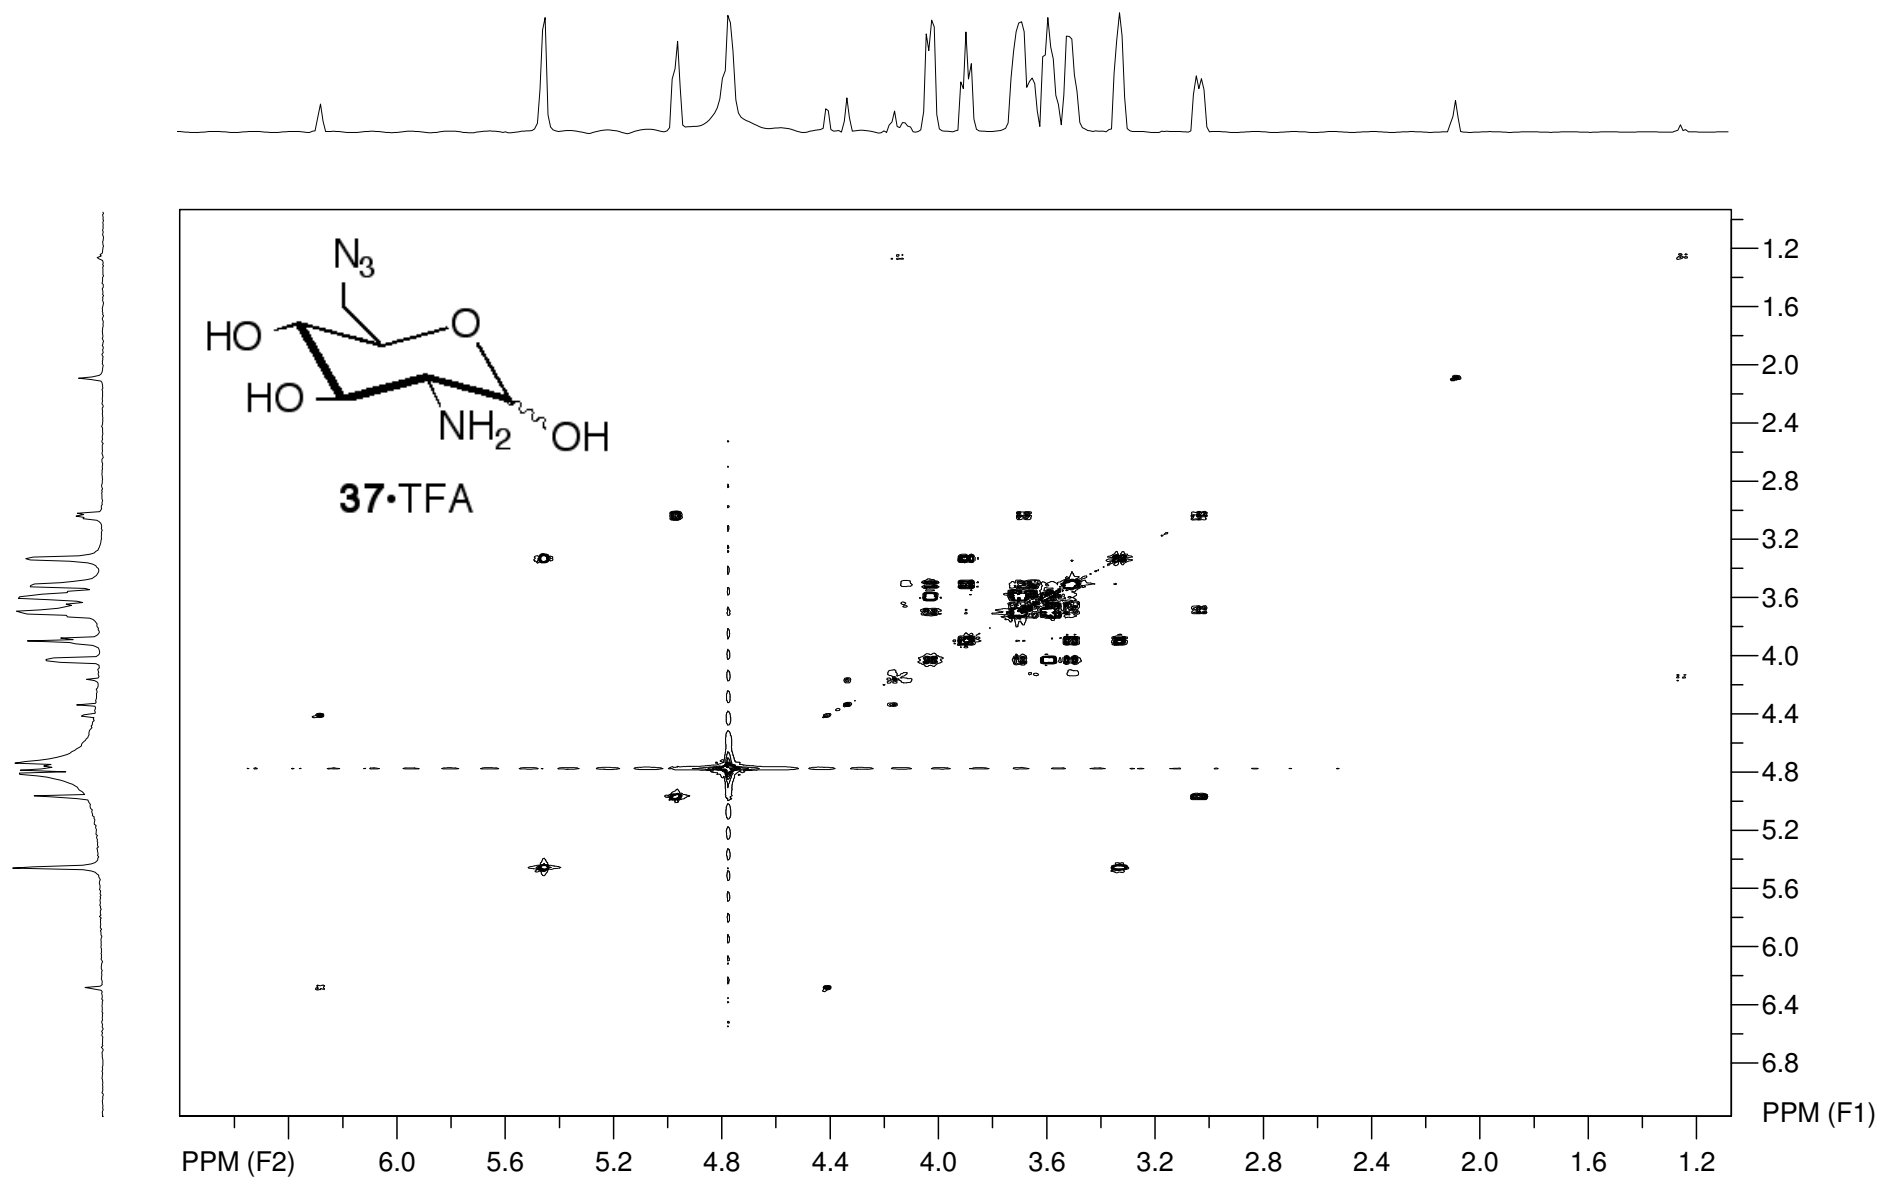

file: C:\Users\Jeff\Documents\NMR Folder\NMR Data\remaining to process\6N3GlcNH2\_TFA\_D2O\F2:\freq. of 0 ppm: 600.549962 MHz  
 transmitter freq.: 600.552832 MHz  
 time domain size: 2048 by 2048 points  
 width (F2): 6009.59 Hz = 10.006806 ppm = 2.934368 Hz/pt  
 number of scans: 2

processed size: 1024 complex points  
 window function: Sine  
 shift: 0.0 degrees  
 Hz/cm: 167.884 ppm/cm: 0.27955

F1: freq. of 0 ppm: 600.549962 MHz  
 processed size: 1024 complex points  
 window function: Sine  
 shift: 0.0 degrees  
 Hz/cm: 311.996 ppm/cm: 0.51951

; 2D: 6N3 GlcNH2.TFA salt in D2O

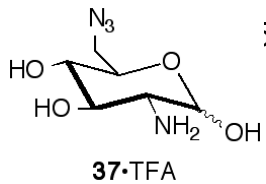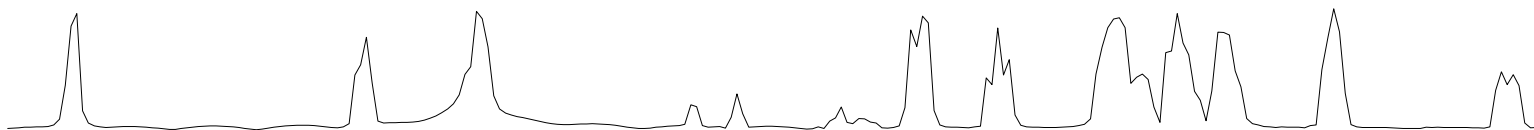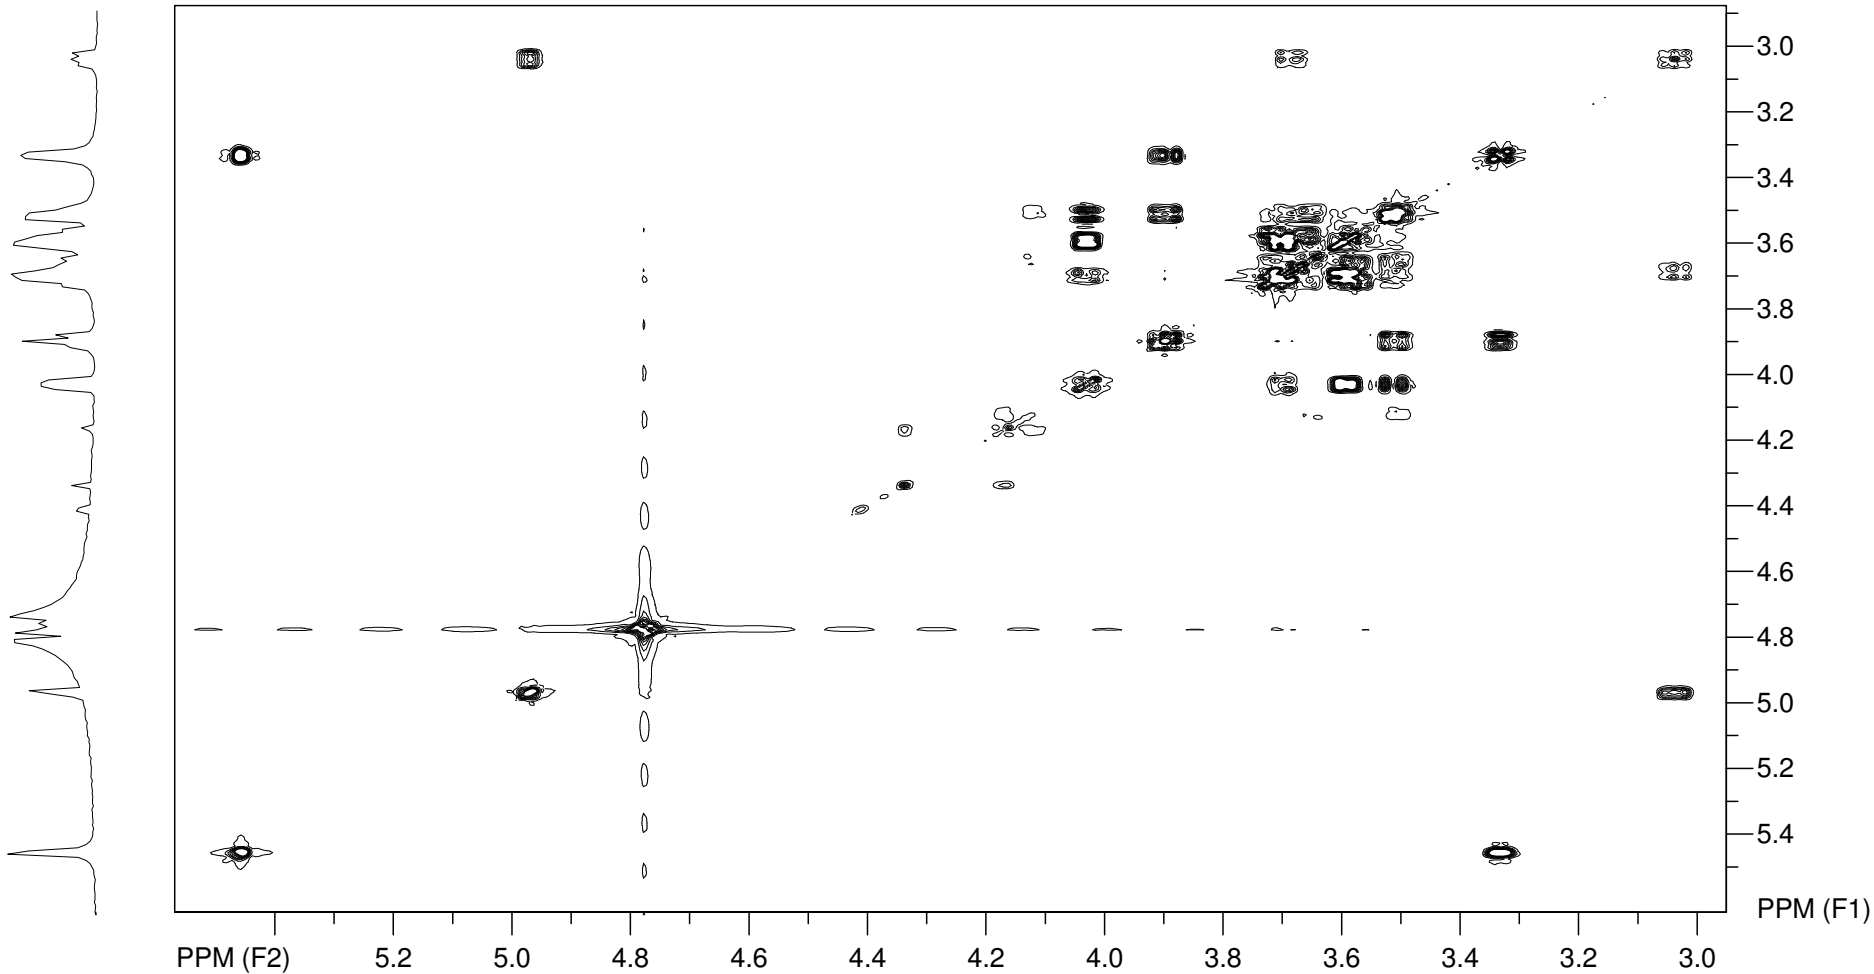

file: C:\Users\Jeff\Documents\NMR Folder\NMR Data\remaining to process\6N3GlcNH2\_TFA\_D2O\F2:\freq. of 0 ppm: 600.549962 MHz  
 transmitter freq.: 600.552832 MHz  
 time domain size: 2048 by 2048 points  
 width (F2): 6009.59 Hz = 10.006806 ppm = 2.934368 Hz/pt  
 number of scans: 2

processed size: 1024 complex points  
 window function: Sine  
 shift: 0.0 degrees  
 Hz/cm: 76.705 ppm/cm: 0.12772

F1: freq. of 0 ppm: 600.549962 MHz  
 processed size: 1024 complex points  
 window function: Sine  
 shift: 0.0 degrees  
 Hz/cm: 138.226 ppm/cm: 0.23016



|               |                      |             |                      |                 |              |                        |                       |
|---------------|----------------------|-------------|----------------------|-----------------|--------------|------------------------|-----------------------|
| Sample Name   | Jeff 25              | Position    | Vial 25              | Instrument Name | Instrument 1 | User Name              | DYL                   |
| Inj Vol       | 1                    | InjPosition |                      | SampleType      | Unknown      | IRM Calibration Status | Success               |
| Data Filename | Direct_Vial 25_Jeff. | ACQ Method  | Direct_small mol_Jef | Comment         |              | Acquired Time          | 8/17/2012 12:32:26 PM |

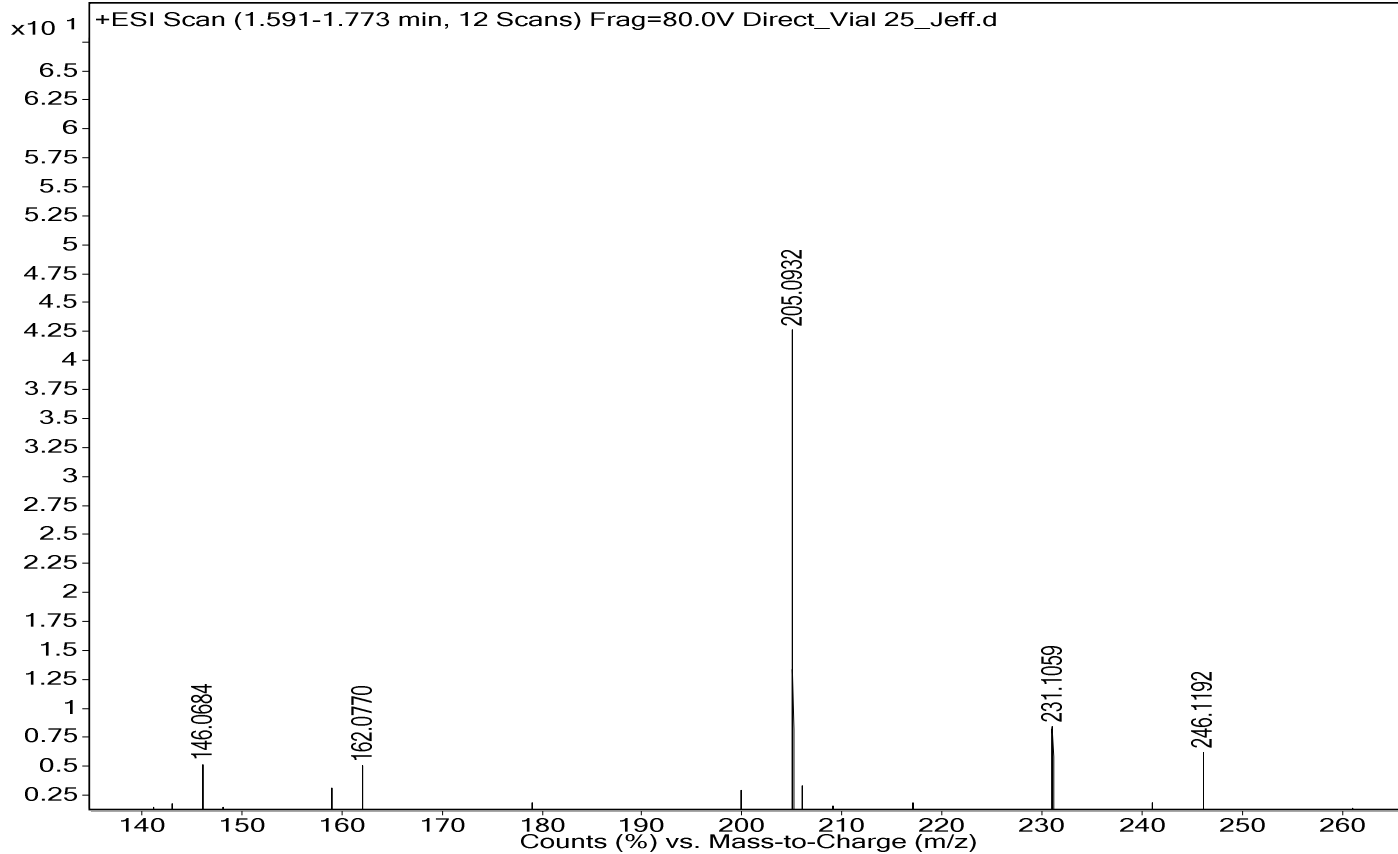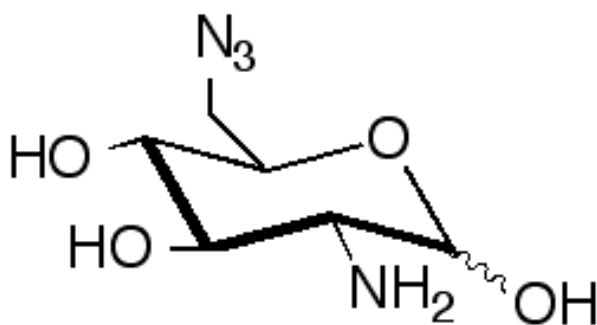

**37-TFA**

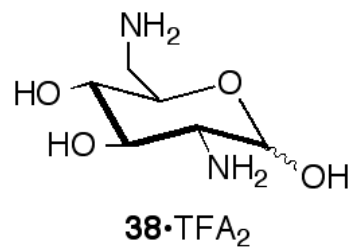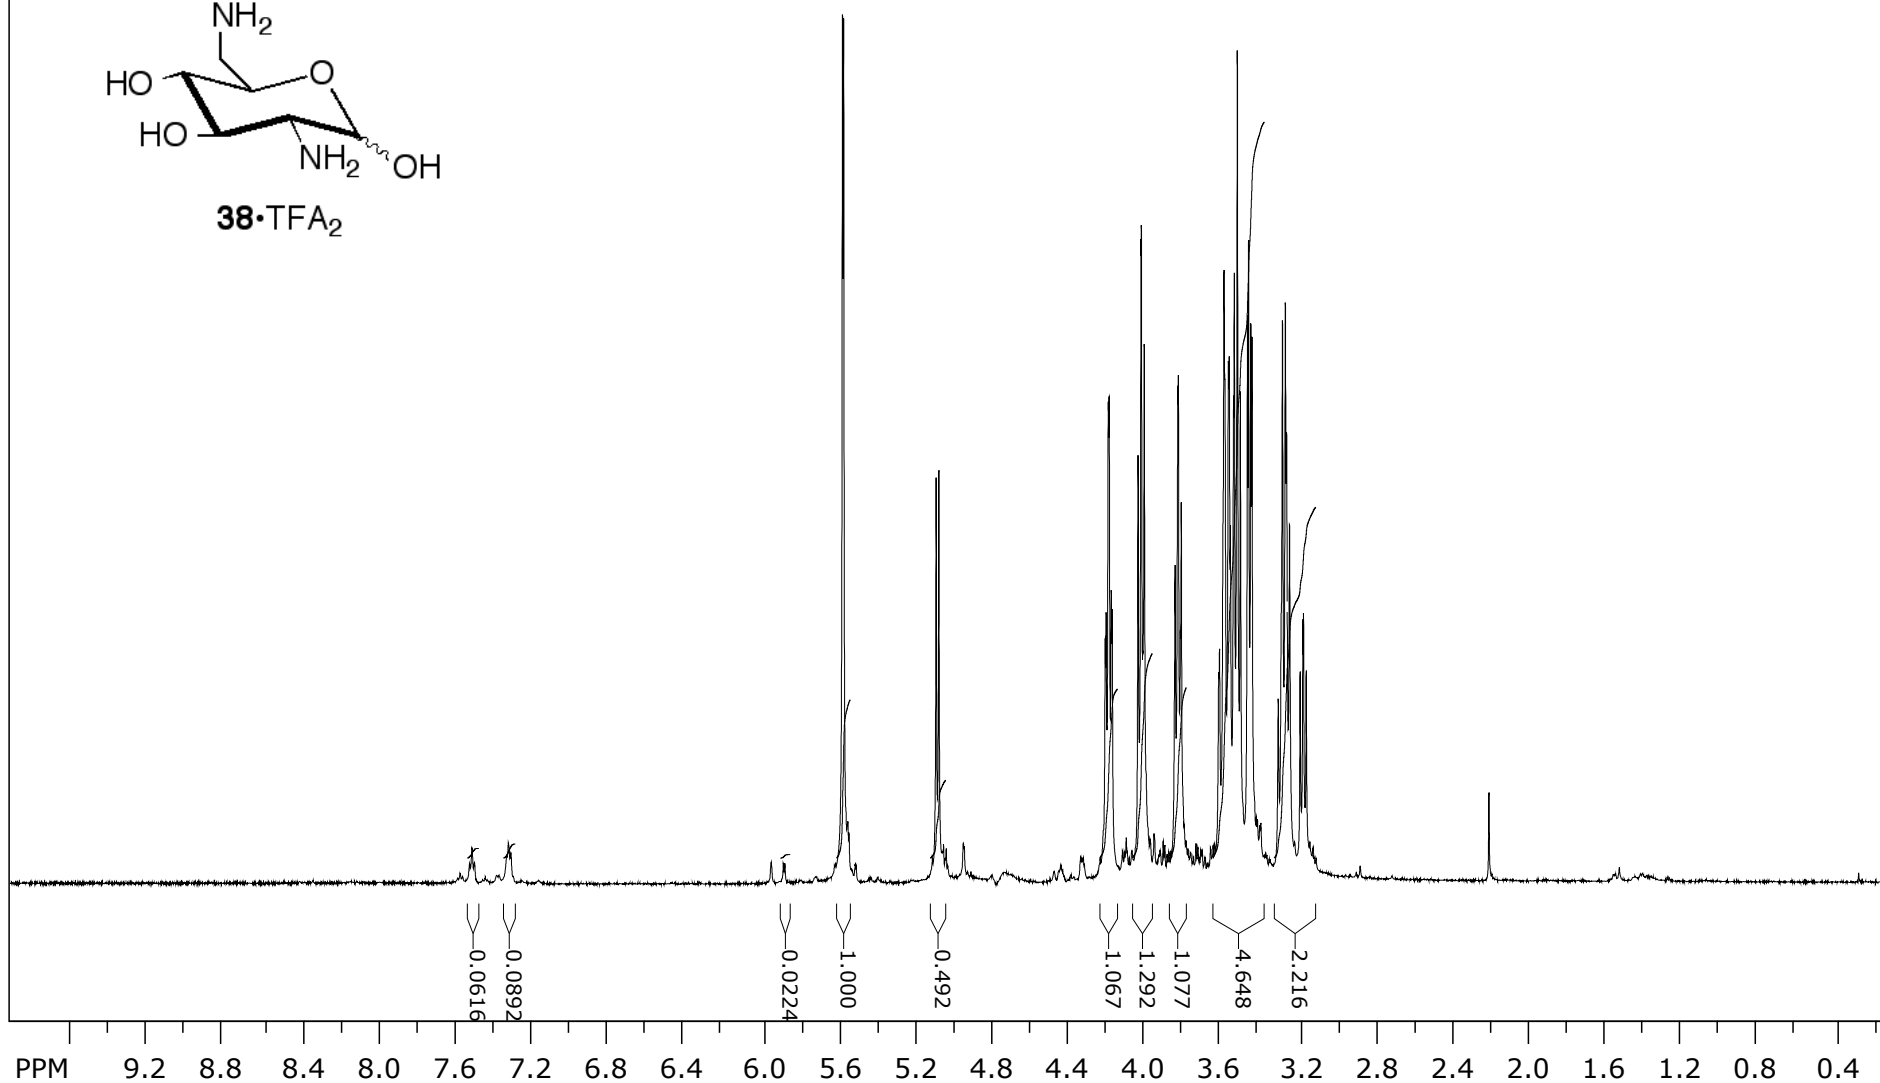

file: ...R Data\26DiAmGlu\_TFAsalt\_D2O\2\fid expt: <zgpr>  
transmitter freq.: 600.552832 MHz  
time domain size: 65536 points  
width: 9615.38 Hz = 16.0109 ppm = 0.146719 Hz/pt  
number of scans: 32

freq. of 0 ppm: 600.549962 MHz  
processed size: 262144 complex points  
LB: 0.000 GF: 0.0000  
Hz/cm: 236.736 ppm/cm: 0.39420

with ammonium trifluoroacetate

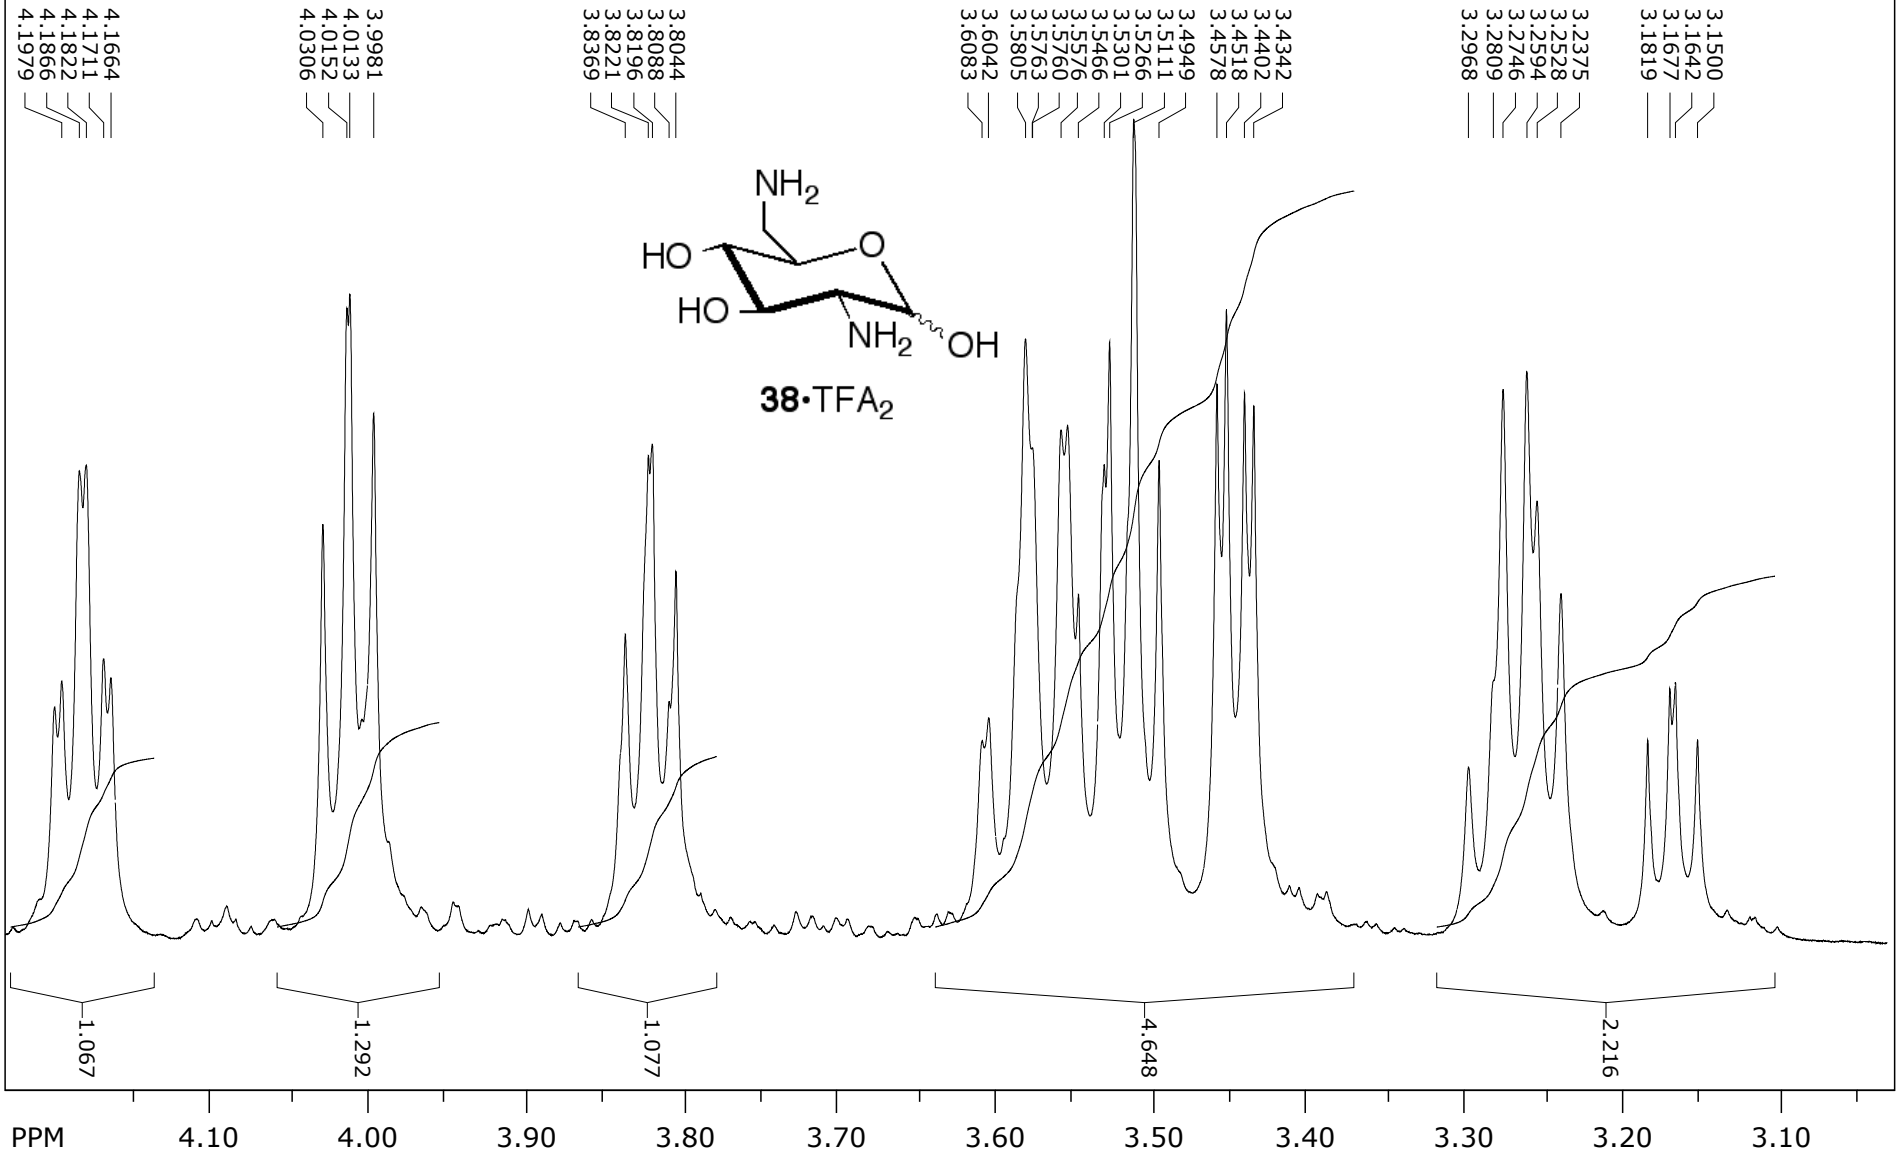

file: ...R Data\26DiAmGlu\_TFA salt\_D2O\2\fid expt: <zgpr>  
 transmitter freq.: 600.552832 MHz  
 time domain size: 65536 points  
 width: 9615.38 Hz = 16.0109 ppm = 0.146719 Hz/pt  
 number of scans: 32

freq. of 0 ppm: 600.549962 MHz  
 processed size: 262144 complex points  
 LB: 0.000 GF: 0.0000  
 Hz/cm: 28.962 ppm/cm: 0.04823

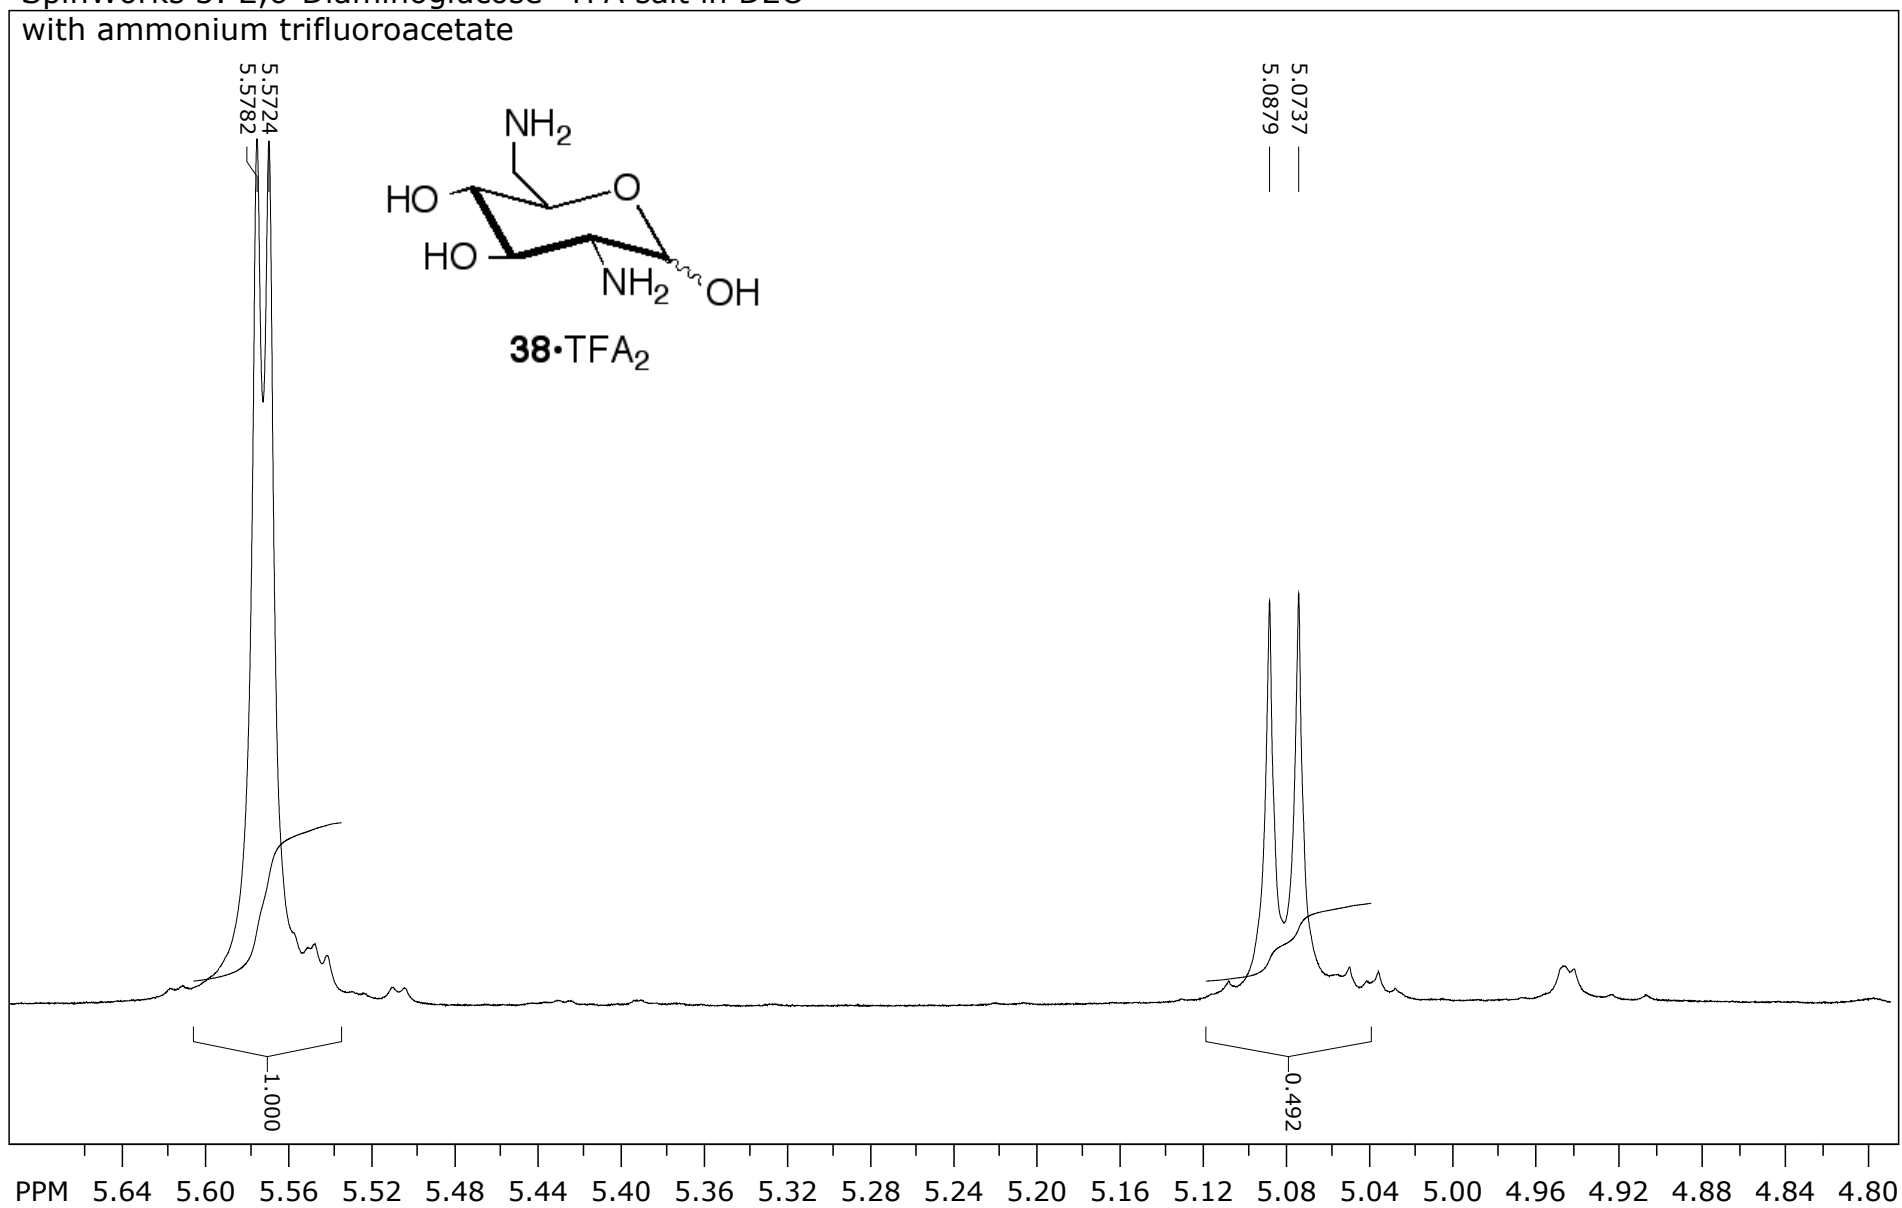

file: ...R Data\26DiAmGlu\_TFA salt\_D2O\2\fid expt: <zgpr>  
transmitter freq.: 600.552832 MHz  
time domain size: 65536 points  
width: 9615.38 Hz = 16.0109 ppm = 0.146719 Hz/pt  
number of scans: 32

freq. of 0 ppm: 600.549962 MHz  
processed size: 262144 complex points  
LB: 0.000 GF: 0.0000  
Hz/cm: 21.892 ppm/cm: 0.03645



## D: 2,6-Diaminoglucose -TFA salt in D2O with ammoniumTFA

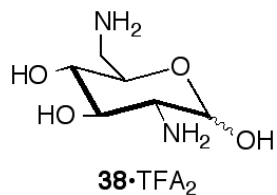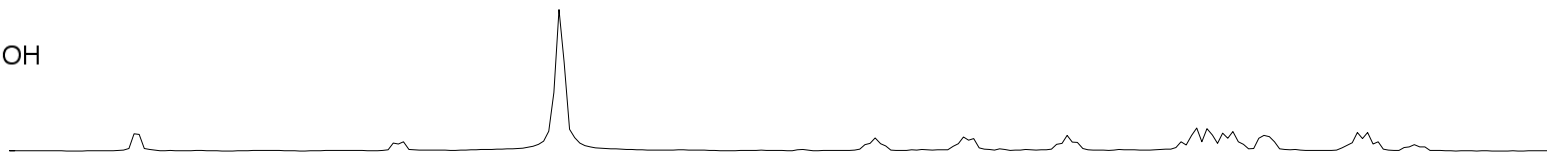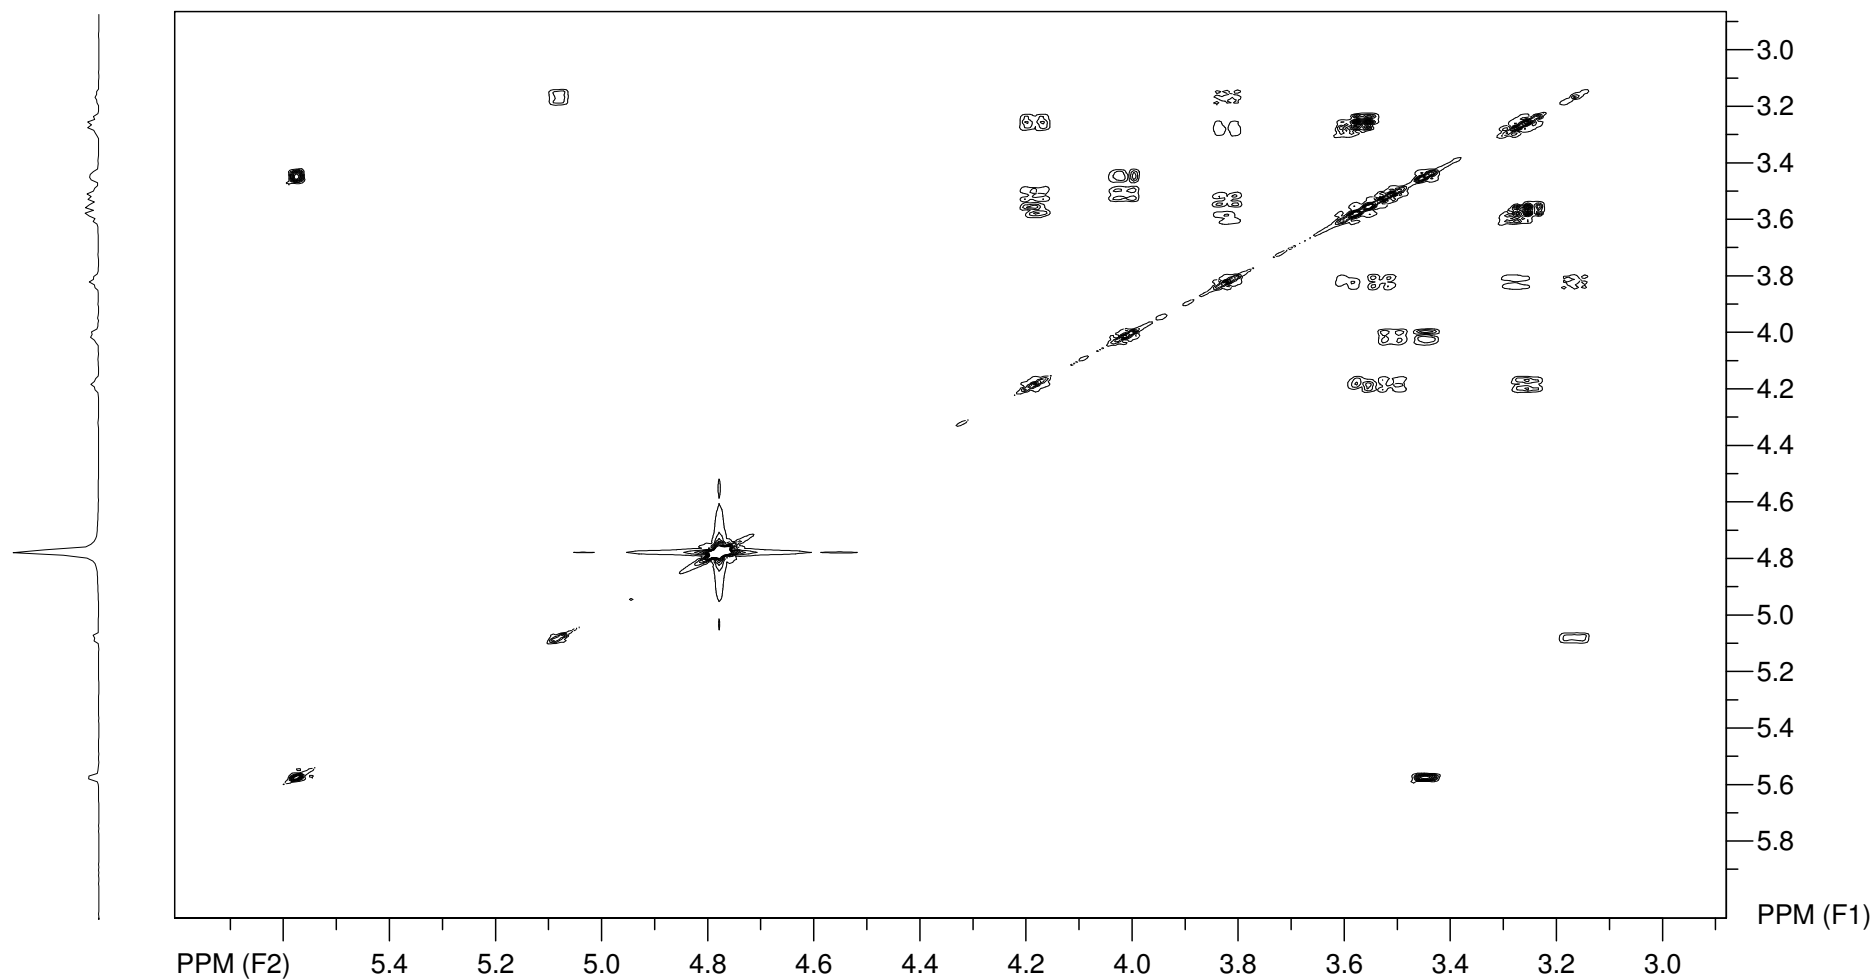

file: C:\Users\Jeff\Documents\NMR Folder\NMR Data\26DiAmGlu\_D2O\_COSY\2\ser  
 transmitter freq.: 600.553566 MHz  
 time domain size: 2048 by 2048 points  
 width (F2): 6009.58 Hz = 10.006793 ppm = 2.934365 Hz/pt  
 number of scans: 2

expt: <cosygp  
 F2: freq. of 0 ppm: 600.549962 MHz  
 processed size: 1024 complex points  
 window function: Sine  
 shift: 0.0 degrees  
 Hz/cm: 85.693 ppm/cm: 0.14269

F1: freq. of 0 ppm: 600.549962 MHz  
 processed size: 1024 complex points  
 window function: Sine  
 shift: 0.0 degrees  
 Hz/cm: 160.574 ppm/cm: 0.26738

with ammonium trifluoroacetate

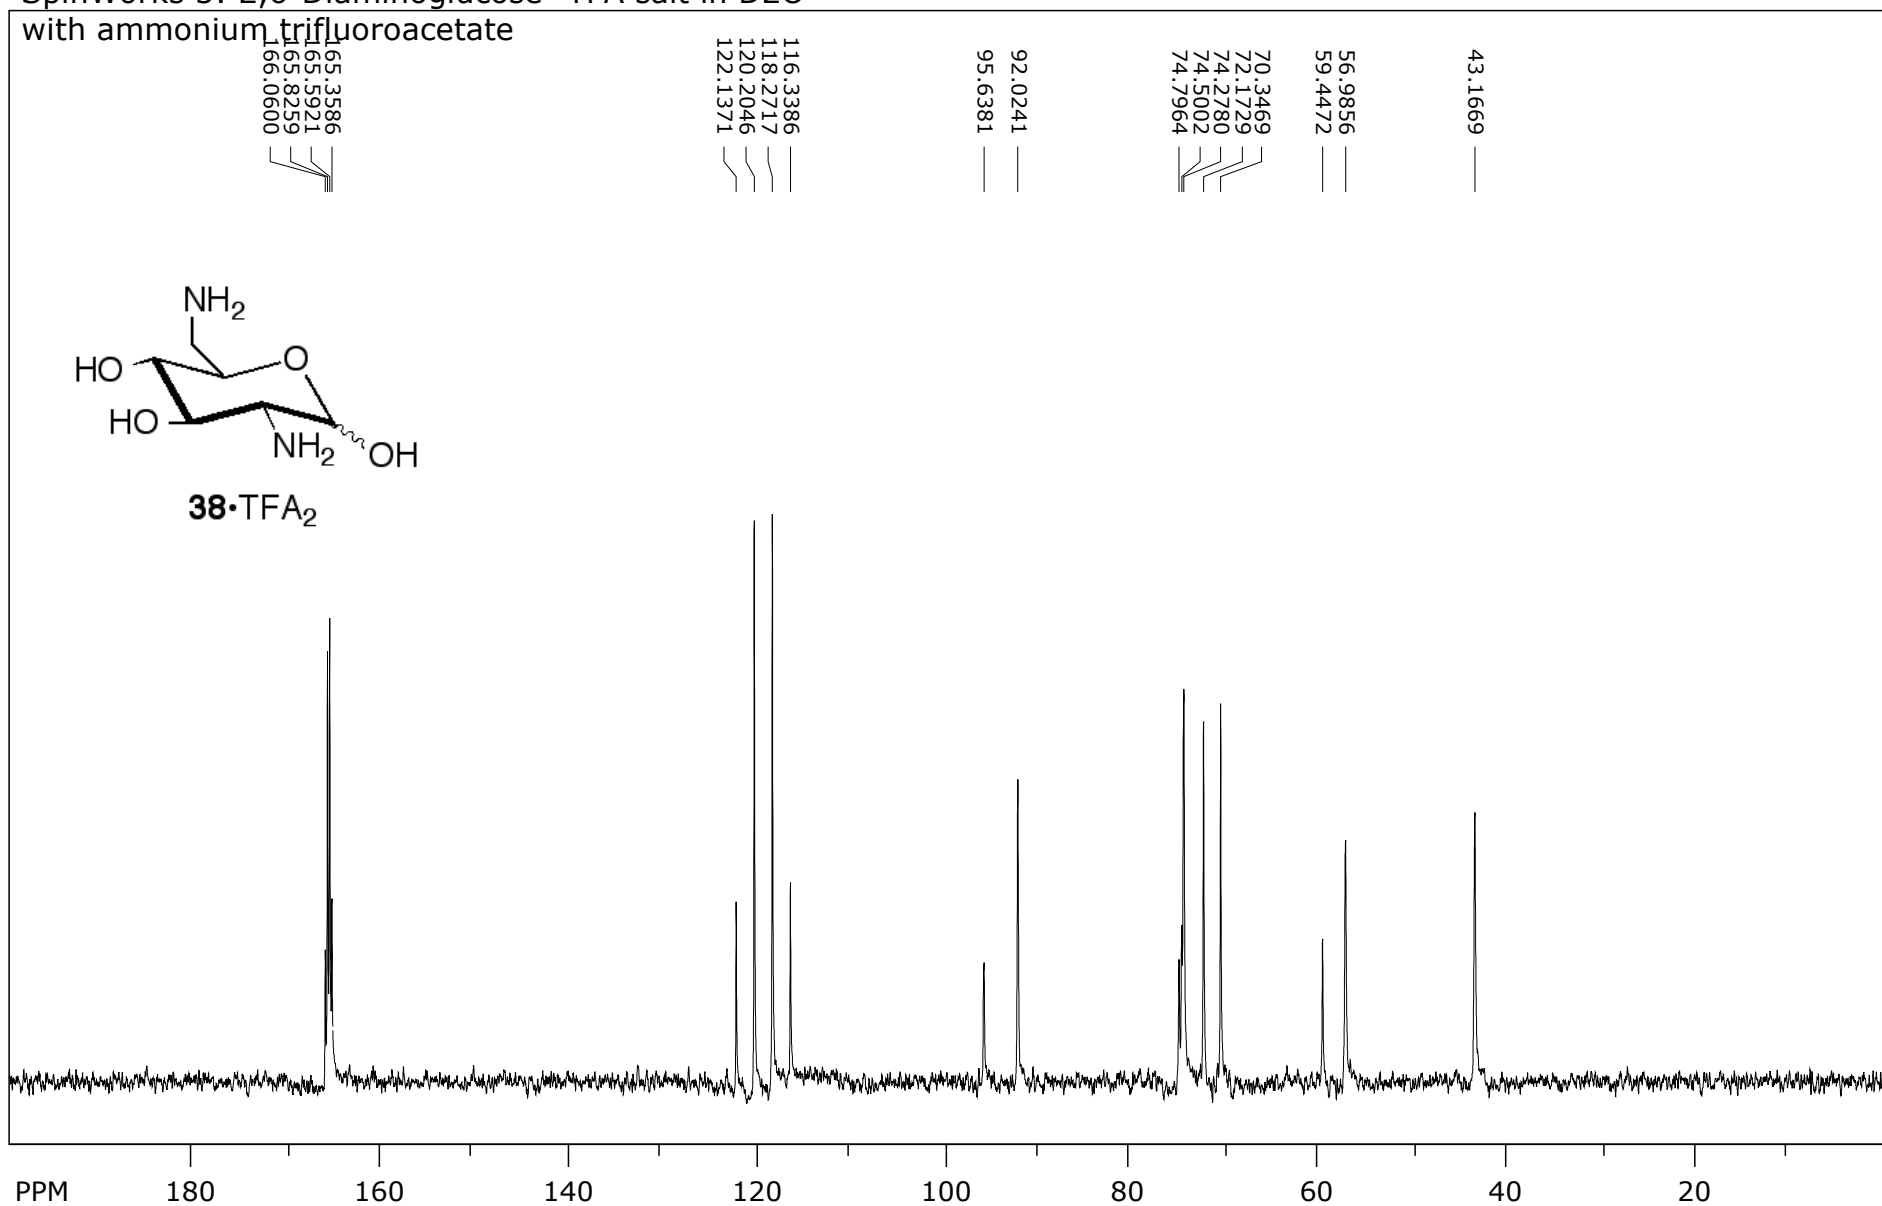

file: ...ata\26DiAmGlu\_TFA salt\_D2O13C\1\fid expt: <zpgg30>  
 transmitter freq.: 151.023519 MHz  
 time domain size: 65536 points  
 width: 36057.69 Hz = 238.7555 ppm = 0.550197 Hz/pt  
 number of scans: 18432

freq. of 0 ppm: 151.008006 MHz  
 processed size: 32768 complex points  
 LB: 10.000 GF: 0.0000  
 Hz/cm: 1215.337 ppm/cm: 8.04734

|               |             |             |             |                 |                                   |                        |             |
|---------------|-------------|-------------|-------------|-----------------|-----------------------------------|------------------------|-------------|
| Sample Name   | Unavailable | Position    | Unavailable | Instrument Name | Unavailable                       | User Name              | Unavailable |
| Inj Vol       | Unavailable | InjPosition | Unavailable | SampleType      | Unavailable                       | IRM Calibration Status | Success     |
| Data Filename | 26DAG1.d    | ACQ Method  |             | Comment         | Sample information is unavailable | Acquired Time          | Unavailable |

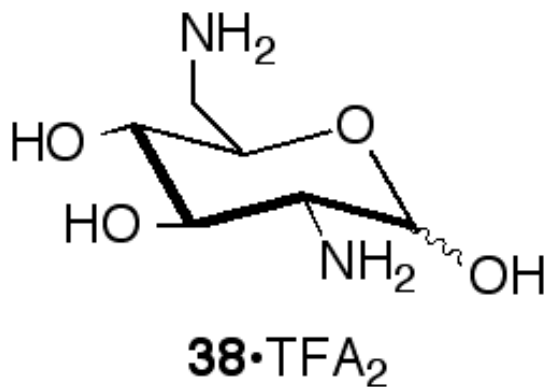

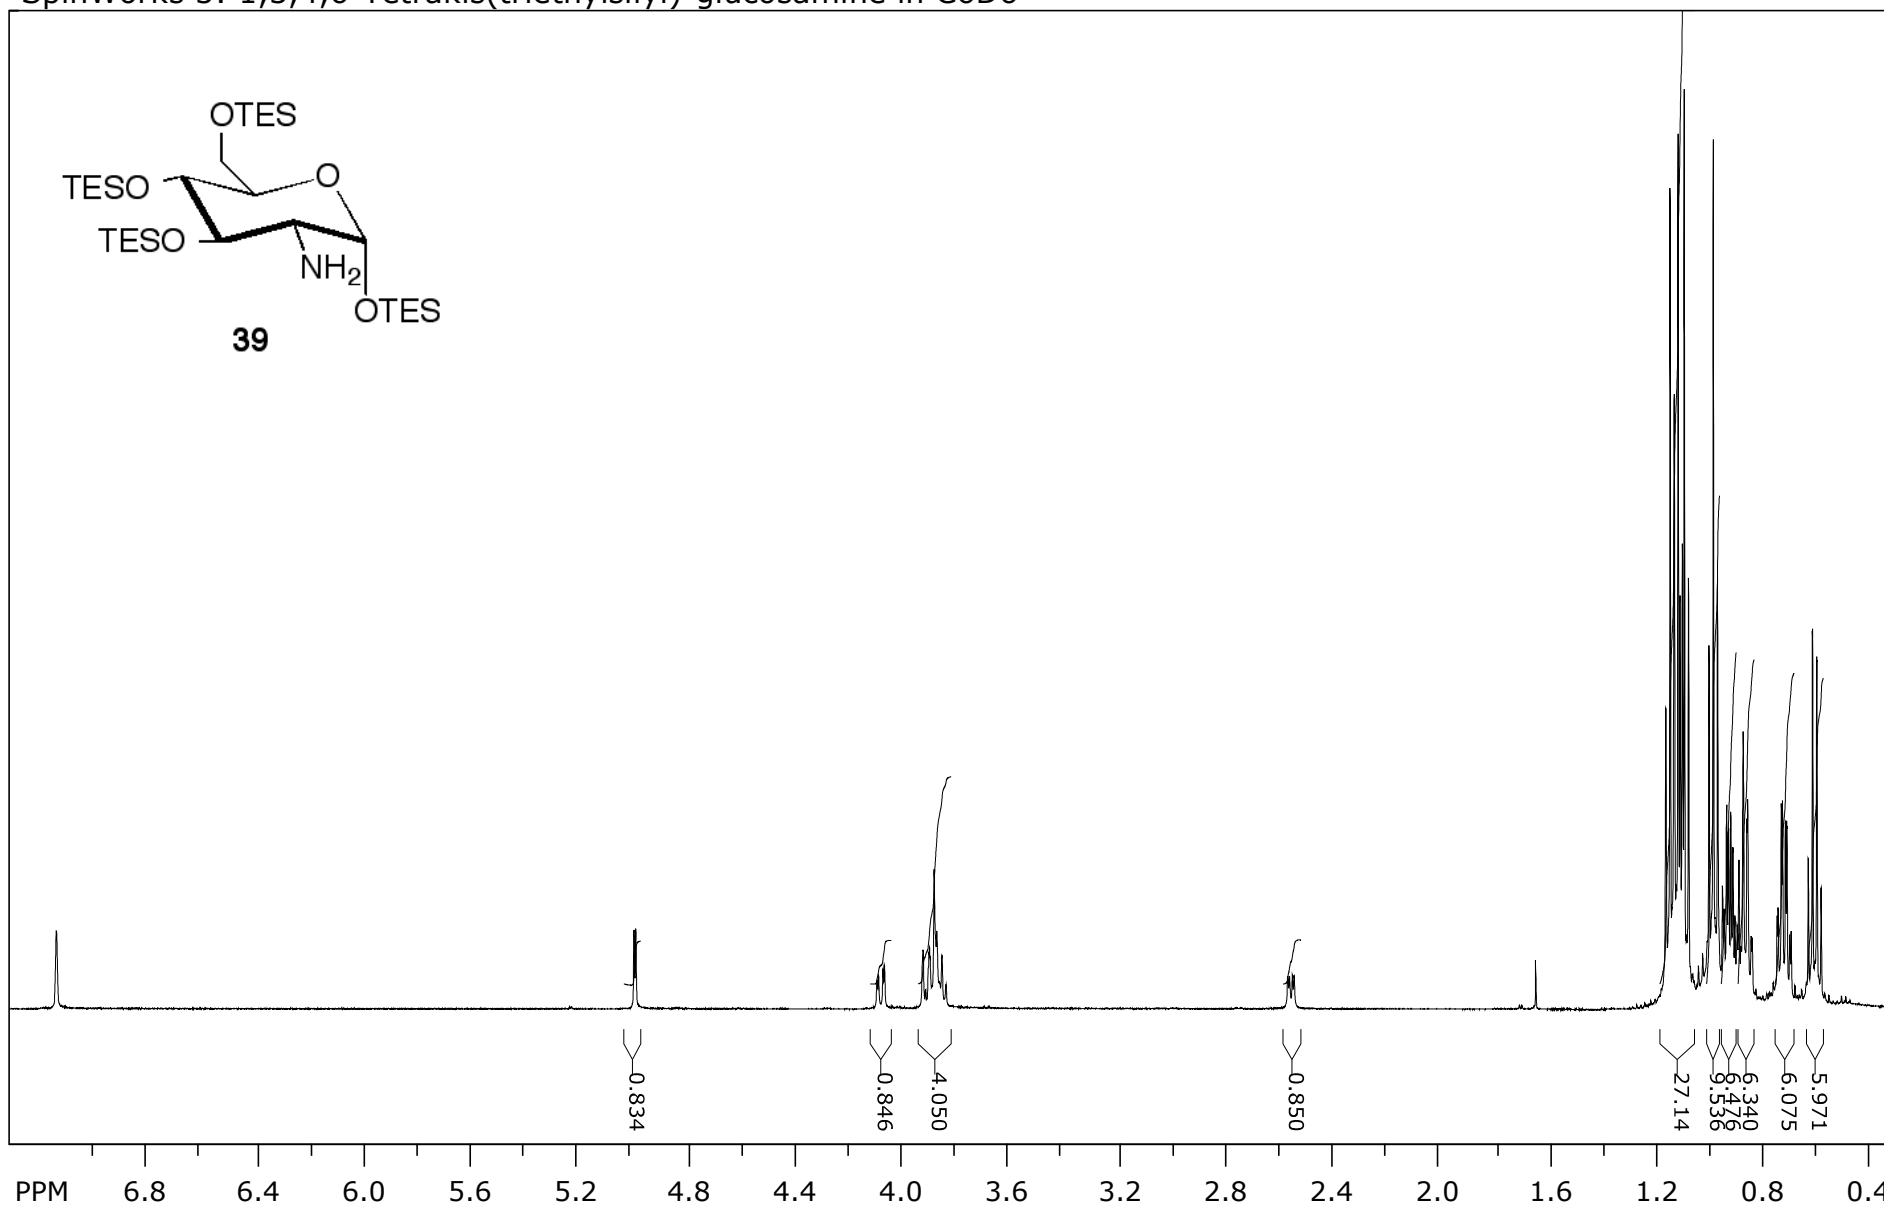

file: ...\_10\TES4GlcNH2 in d6 benzene\1\fid expt: <zg>  
transmitter freq.: 500.049088 MHz  
time domain size: 65536 points  
width: 6009.62 Hz = 12.0181 ppm = 0.091699 Hz/pt  
number of scans: 32

freq. of 0 ppm: 500.046065 MHz  
processed size: 32768 complex points  
LB: 0.000 GF: 0.0000  
Hz/cm: 140.235 ppm/cm: 0.28044

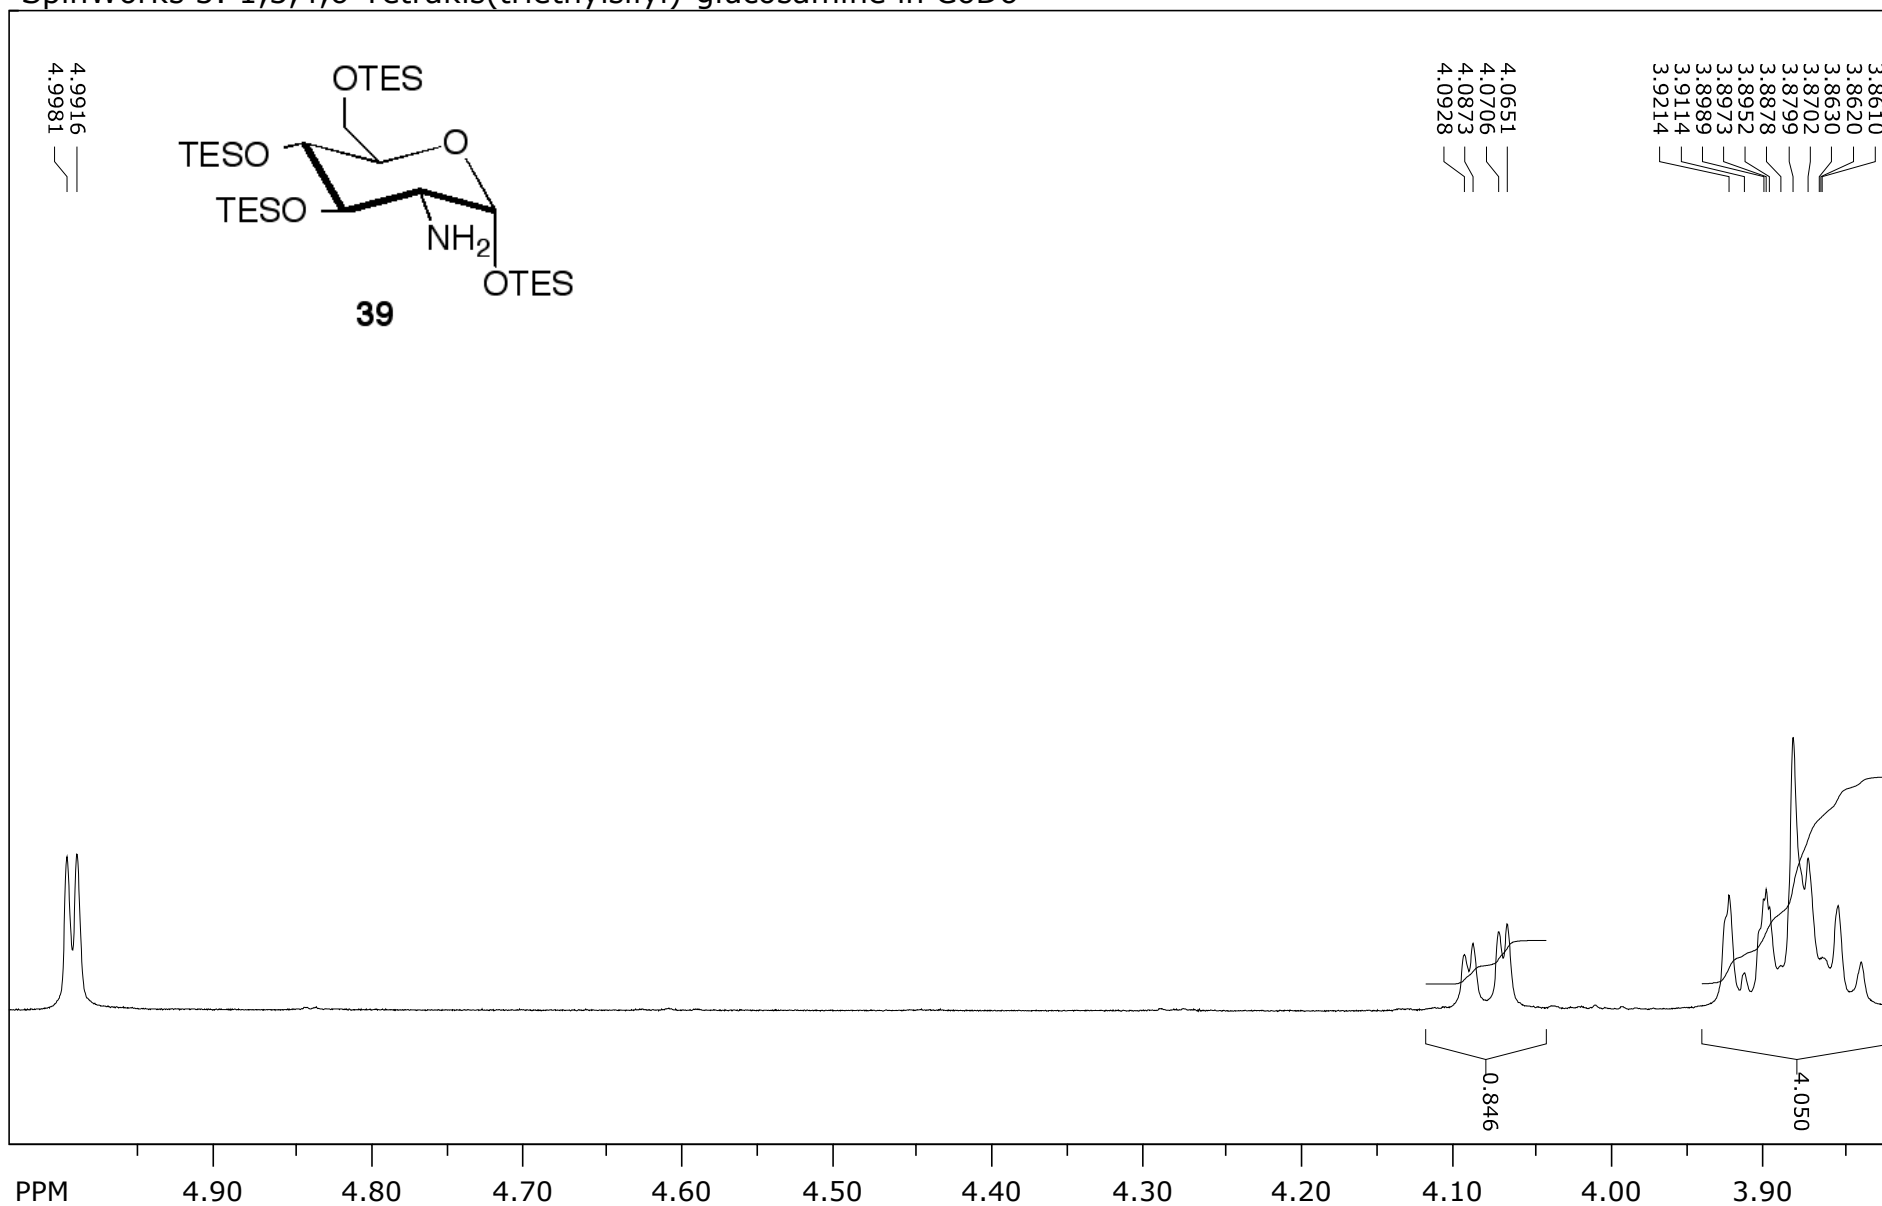

file: ...\_10\TES4GlcNH2 in d6 benzene\1\fid expt: <zg>  
transmitter freq.: 500.049088 MHz  
time domain size: 65536 points  
width: 6009.62 Hz = 12.0181 ppm = 0.091699 Hz/pt  
number of scans: 32

freq. of 0 ppm: 500.046065 MHz  
processed size: 32768 complex points  
LB: 0.000 GF: 0.0000  
Hz/cm: 24.387 ppm/cm: 0.04877

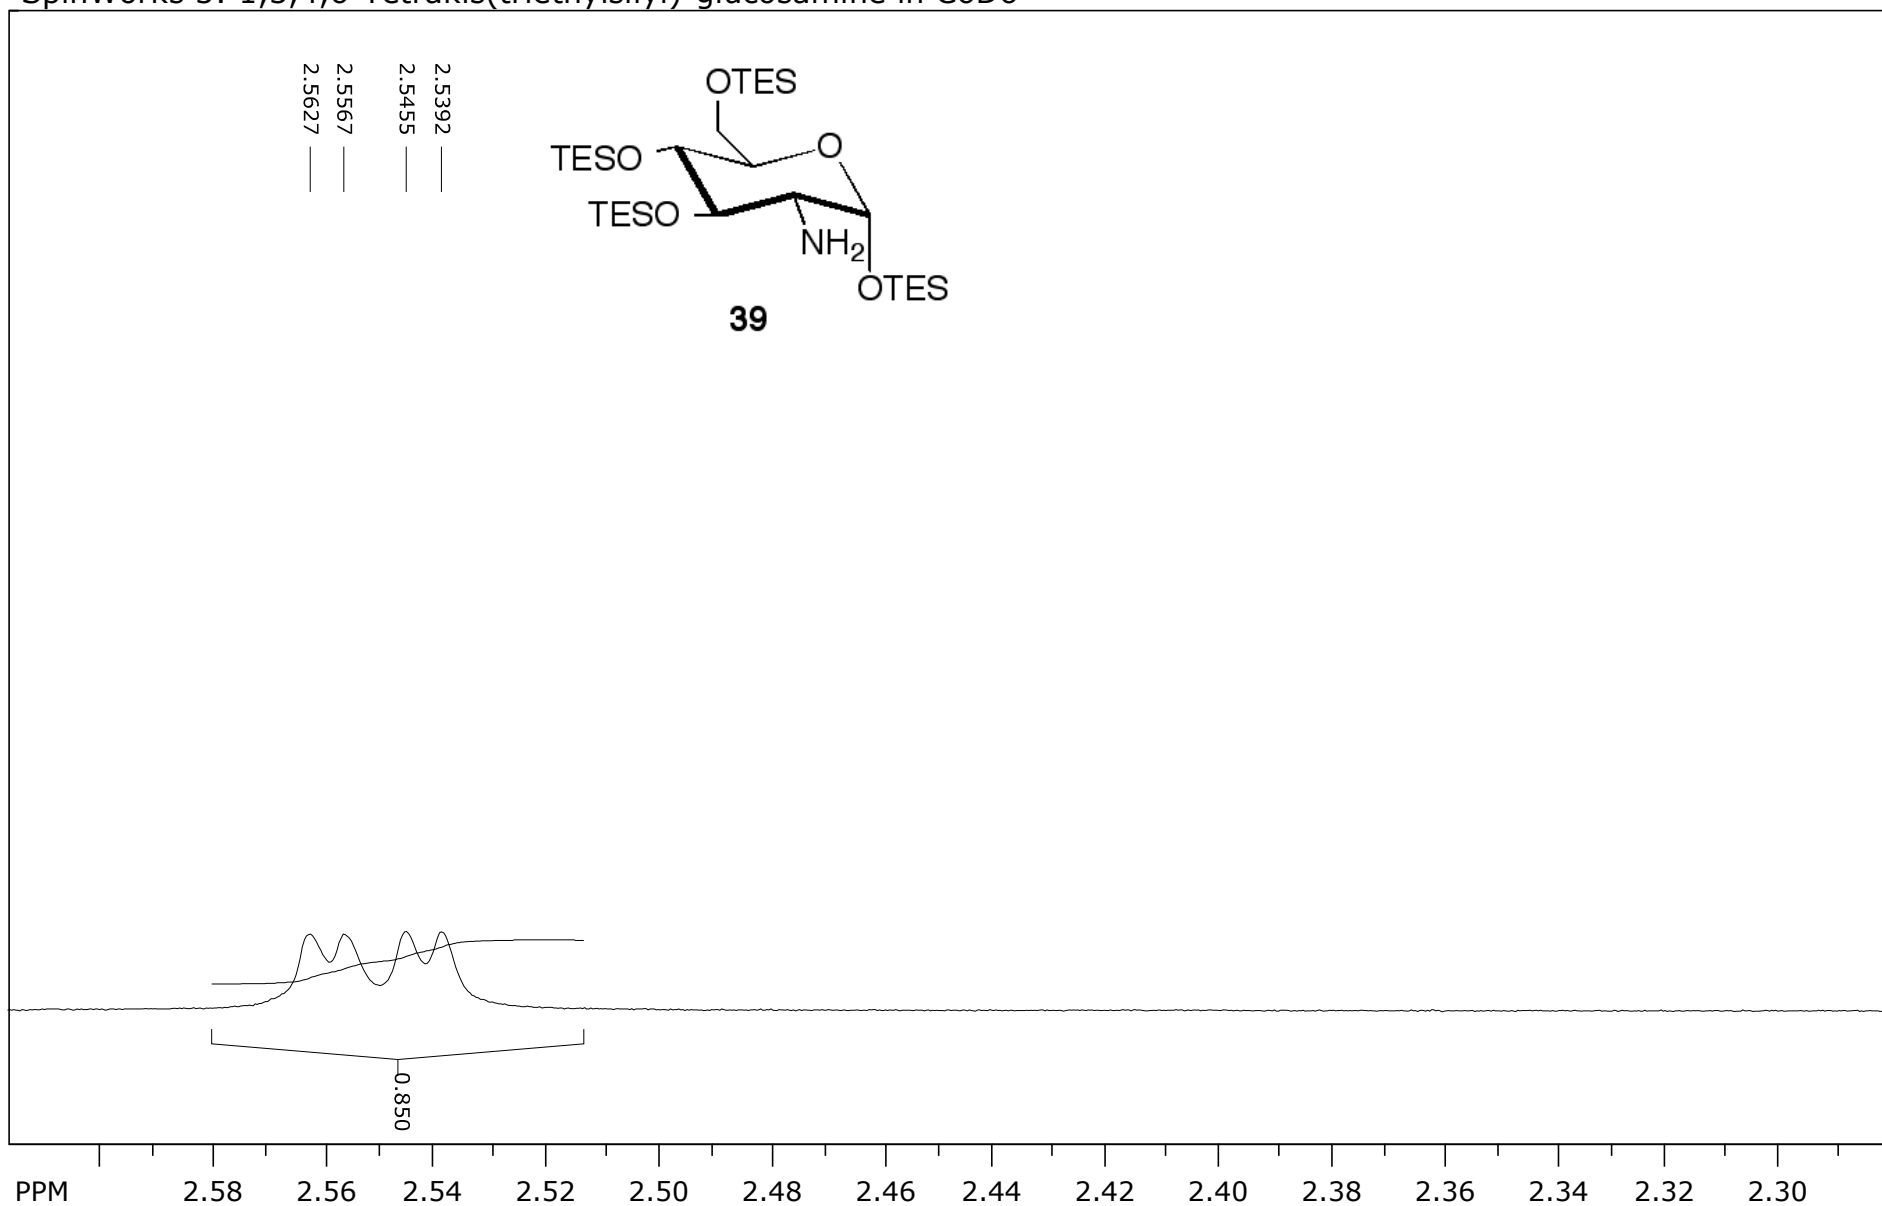

file: ...\_10\TES4GlcNH2 in d6 benzene\1\fid expt: <zg>  
transmitter freq.: 500.049088 MHz  
time domain size: 65536 points  
width: 6009.62 Hz = 12.0181 ppm = 0.091699 Hz/pt  
number of scans: 32

freq. of 0 ppm: 500.046065 MHz  
processed size: 32768 complex points  
LB: 0.000 GF: 0.0000  
Hz/cm: 6.747 ppm/cm: 0.01349

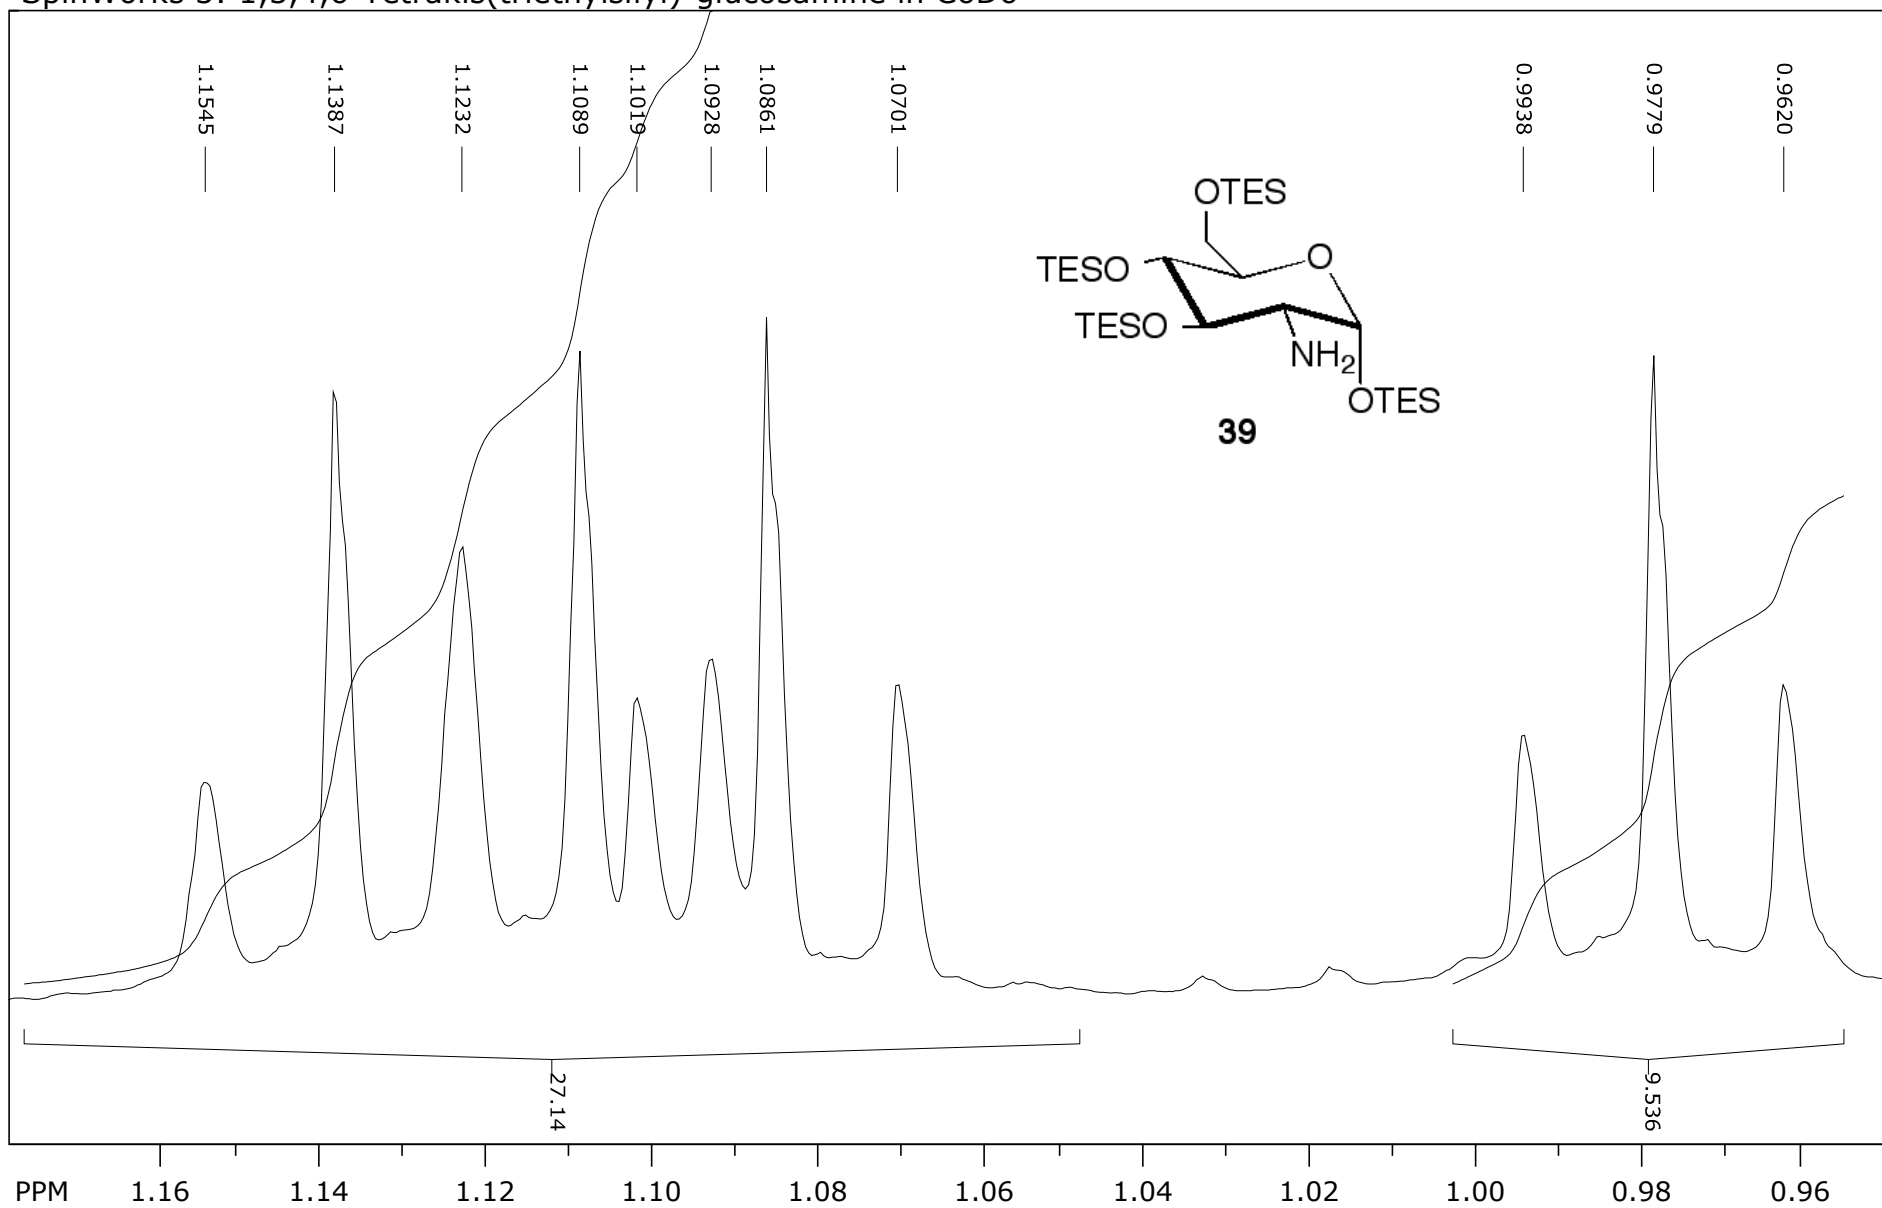

file: ...\_10\TES4GlcNH2 in d6 benzene\1\fid expt: <zg>  
transmitter freq.: 500.049088 MHz  
time domain size: 65536 points  
width: 6009.62 Hz = 12.0181 ppm = 0.091699 Hz/pt  
number of scans: 32

freq. of 0 ppm: 500.046065 MHz  
processed size: 32768 complex points  
LB: 0.000 GF: 0.0000  
Hz/cm: 4.590 ppm/cm: 0.00918

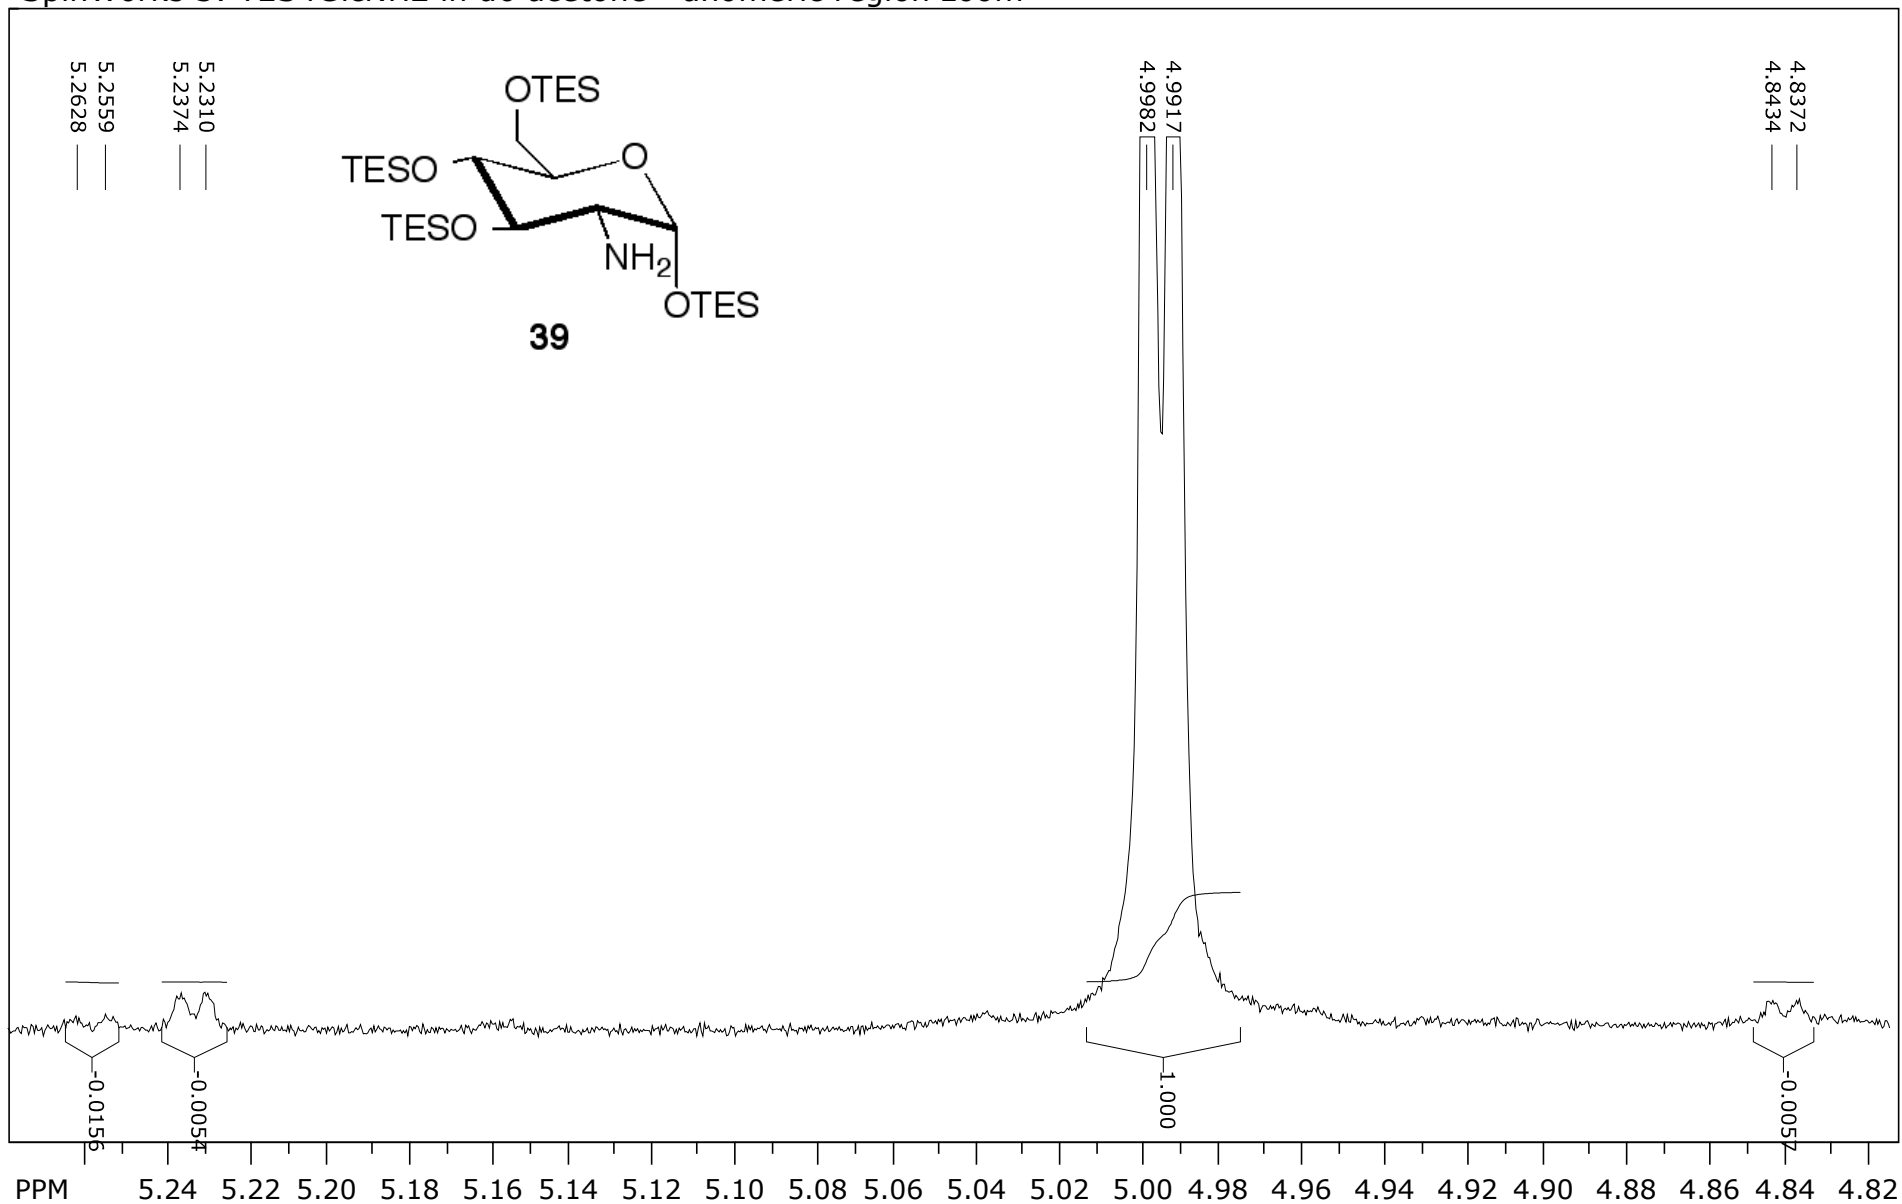

file: ...\_10\TES4GlcNH2 in d6 benzene\1\fid expt: <zg>  
 transmitter freq.: 500.049088 MHz  
 time domain size: 65536 points  
 width: 6009.62 Hz = 12.0181 ppm = 0.091699 Hz/pt  
 number of scans: 32

freq. of 0 ppm: 500.046065 MHz  
 processed size: 32768 complex points  
 LB: 0.000 GF: 0.0000  
 Hz/cm: 9.317 ppm/cm: 0.01863



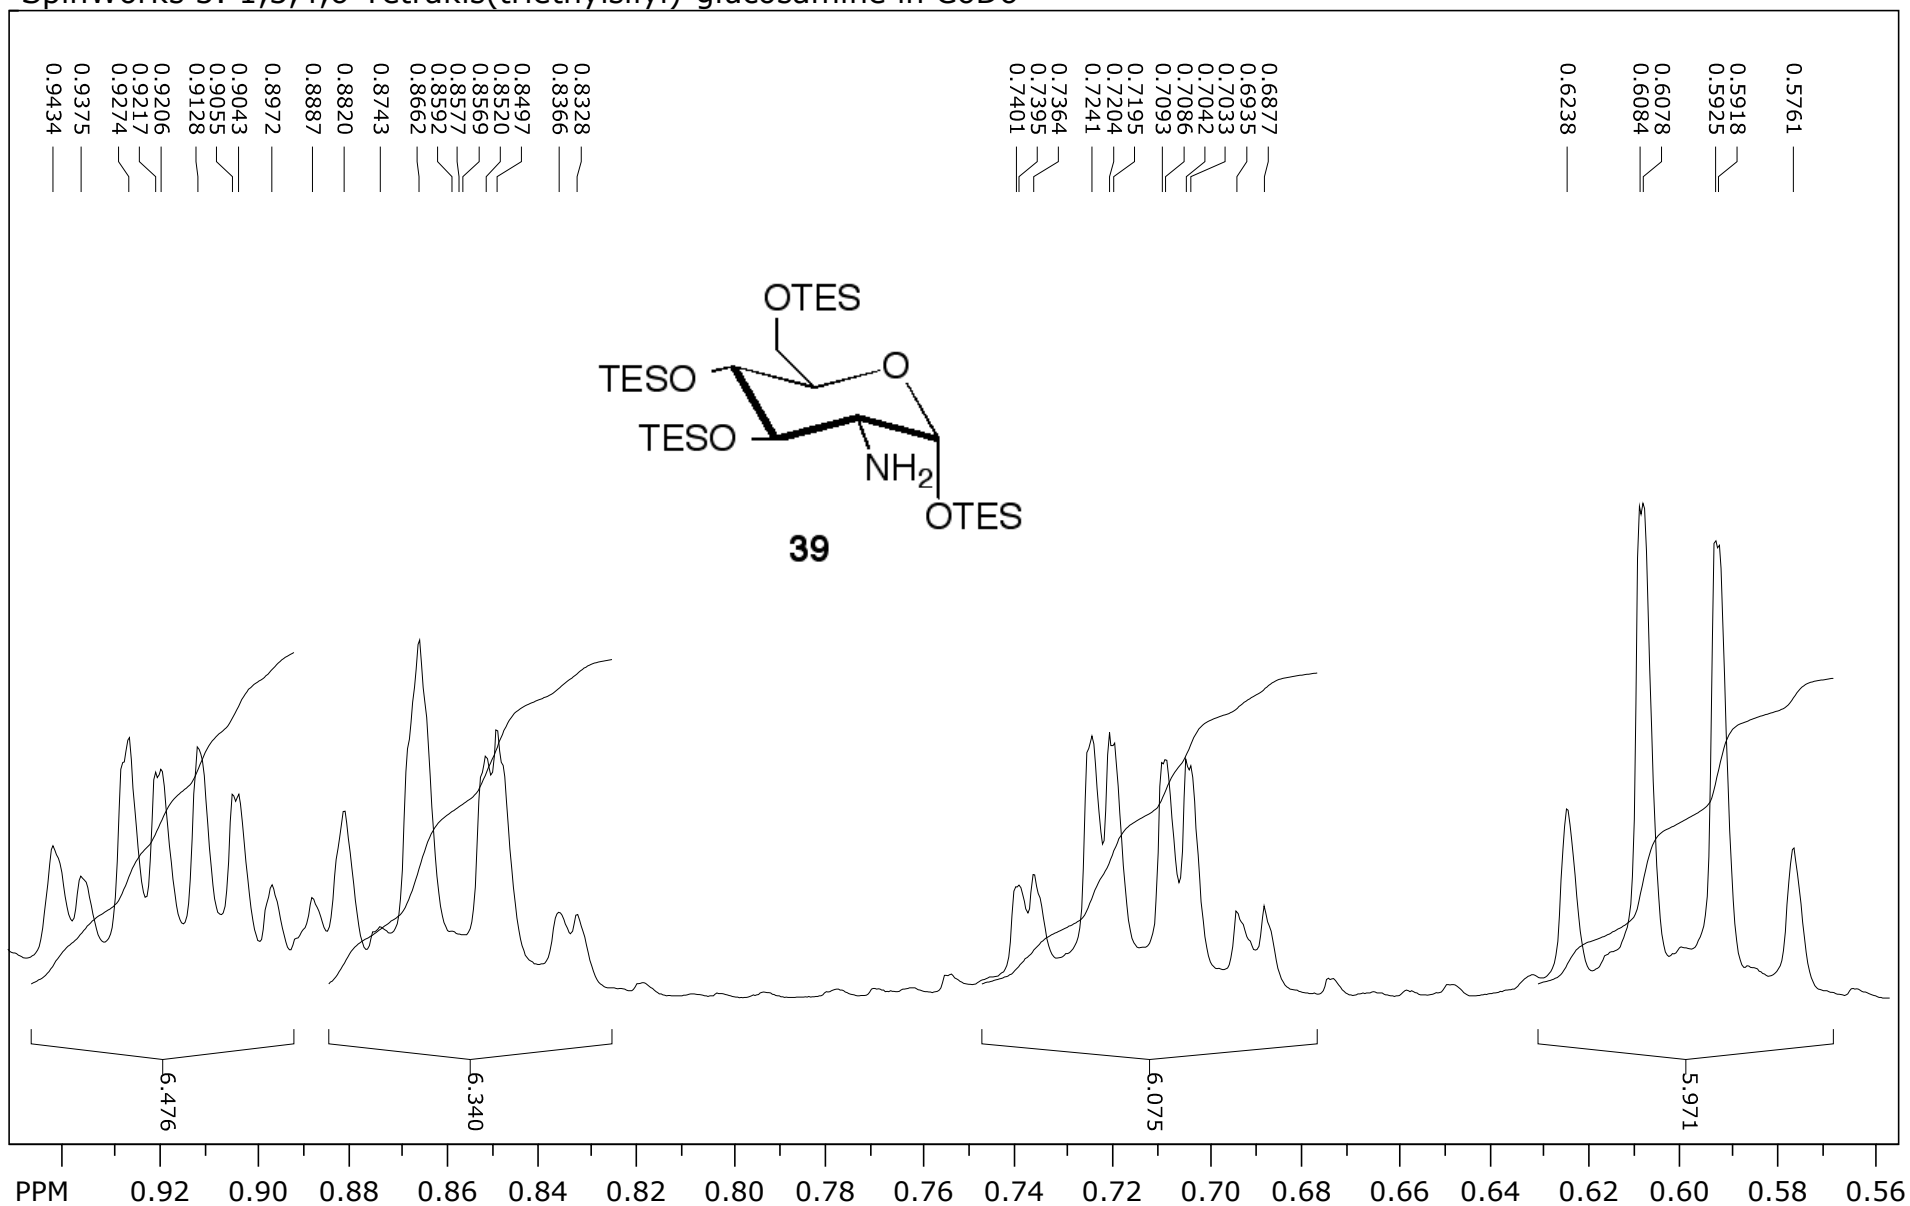

file: ...\_10\TES4GlcNH2 in d6 benzene\1\fid expt: <zg>  
transmitter freq.: 500.049088 MHz  
time domain size: 65536 points  
width: 6009.62 Hz = 12.0181 ppm = 0.091699 Hz/pt  
number of scans: 32

freq. of 0 ppm: 500.046065 MHz  
processed size: 32768 complex points  
LB: 0.000 GF: 0.0000  
Hz/cm: 7.947 ppm/cm: 0.01589

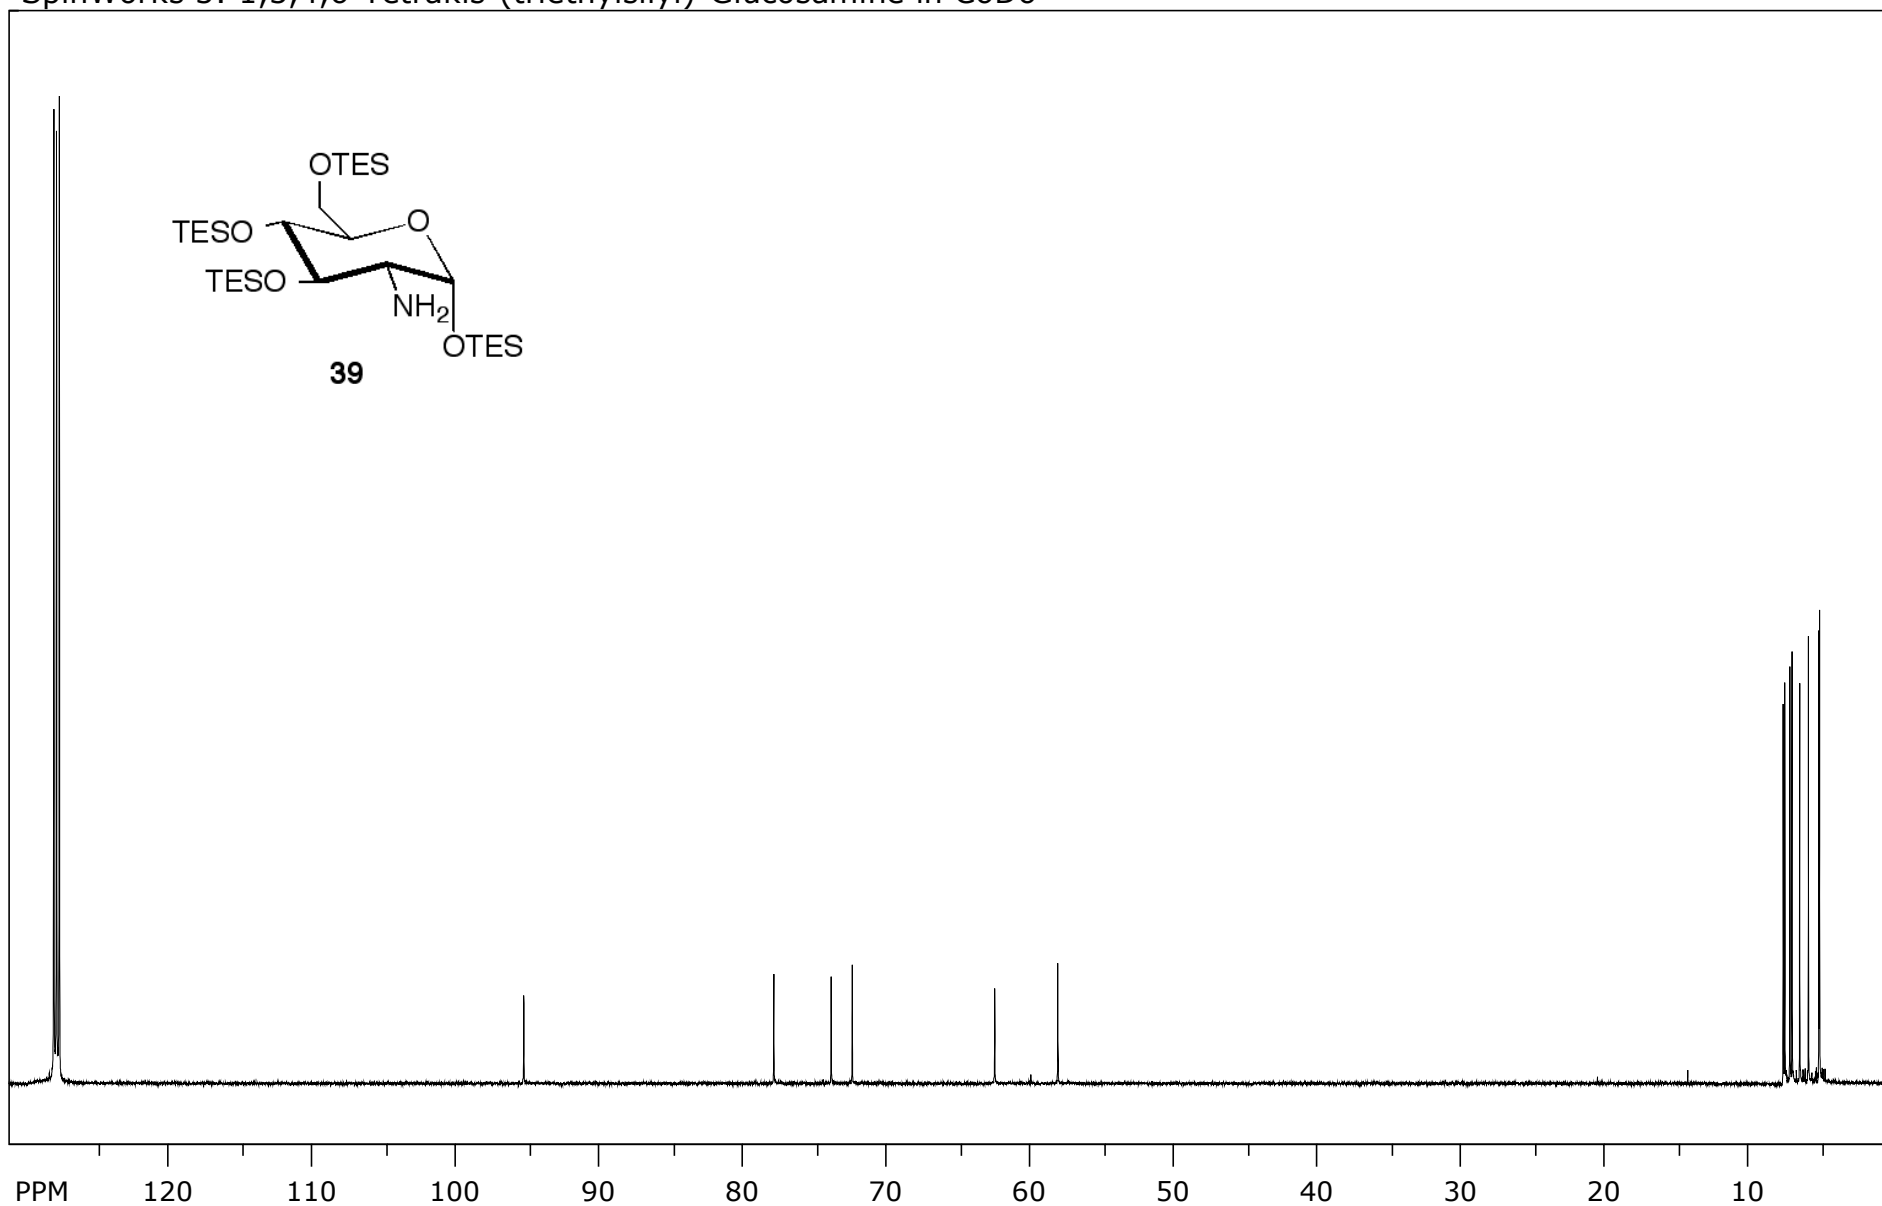

file: ...\_10\TES4GlcNH2 in d6 benzene\2\fid exp: <zpgg30>  
transmitter freq.: 125.749240 MHz  
time domain size: 65536 points  
width: 30030.03 Hz = 238.8088 ppm = 0.458222 Hz/pt  
number of scans: 256

freq. of 0 ppm: 125.736637 MHz  
processed size: 32768 complex points  
LB: 1.000 GF: 0.0000  
Hz/cm: 660.429 ppm/cm: 5.25195

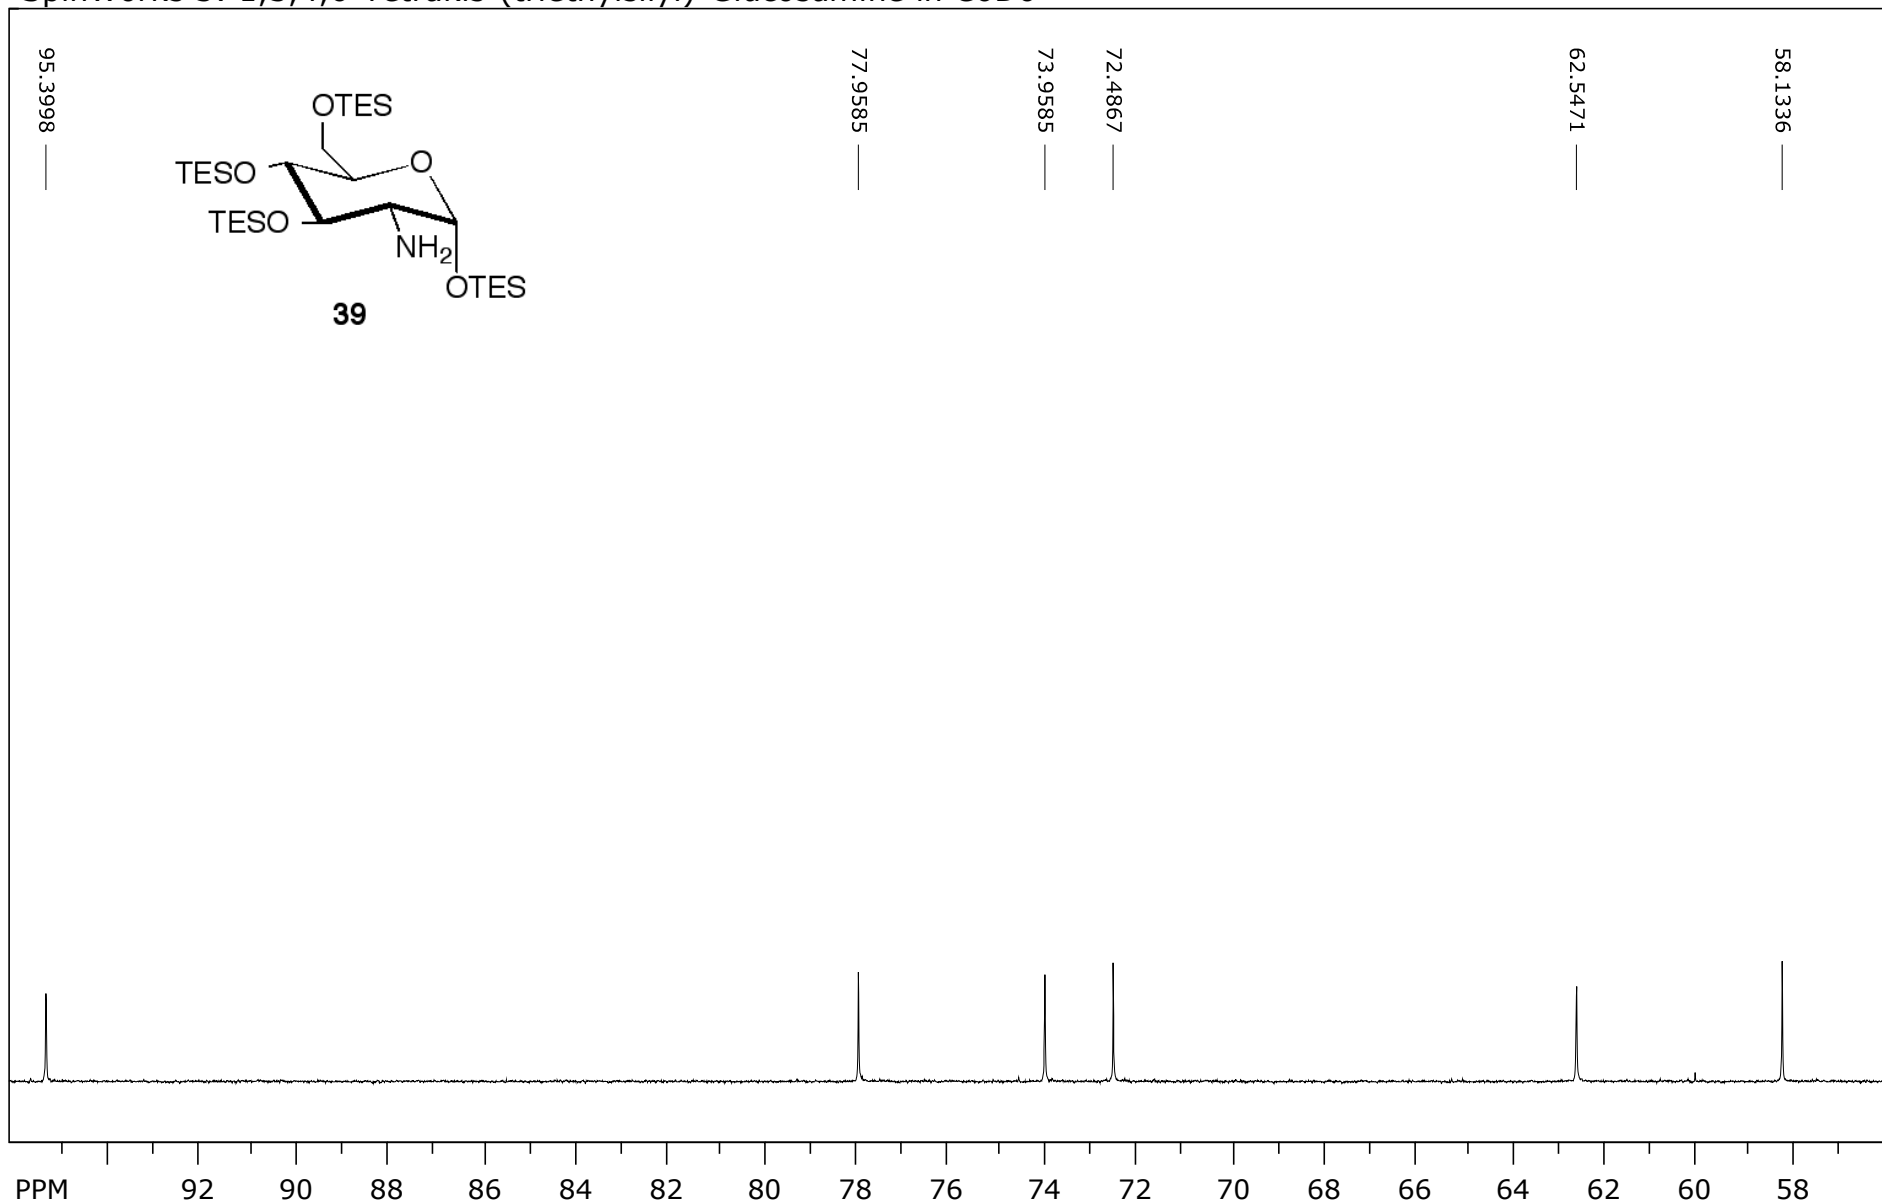

file: ...\_10\TES4GlcNH2 in d6 benzene\2\fid expt: <zpgg30>  
transmitter freq.: 125.749240 MHz  
time domain size: 65536 points  
width: 30030.03 Hz = 238.8088 ppm = 0.458222 Hz/pt  
number of scans: 256

freq. of 0 ppm: 125.736637 MHz  
processed size: 32768 complex points  
LB: 1.000 GF: 0.0000  
Hz/cm: 203.181 ppm/cm: 1.61576

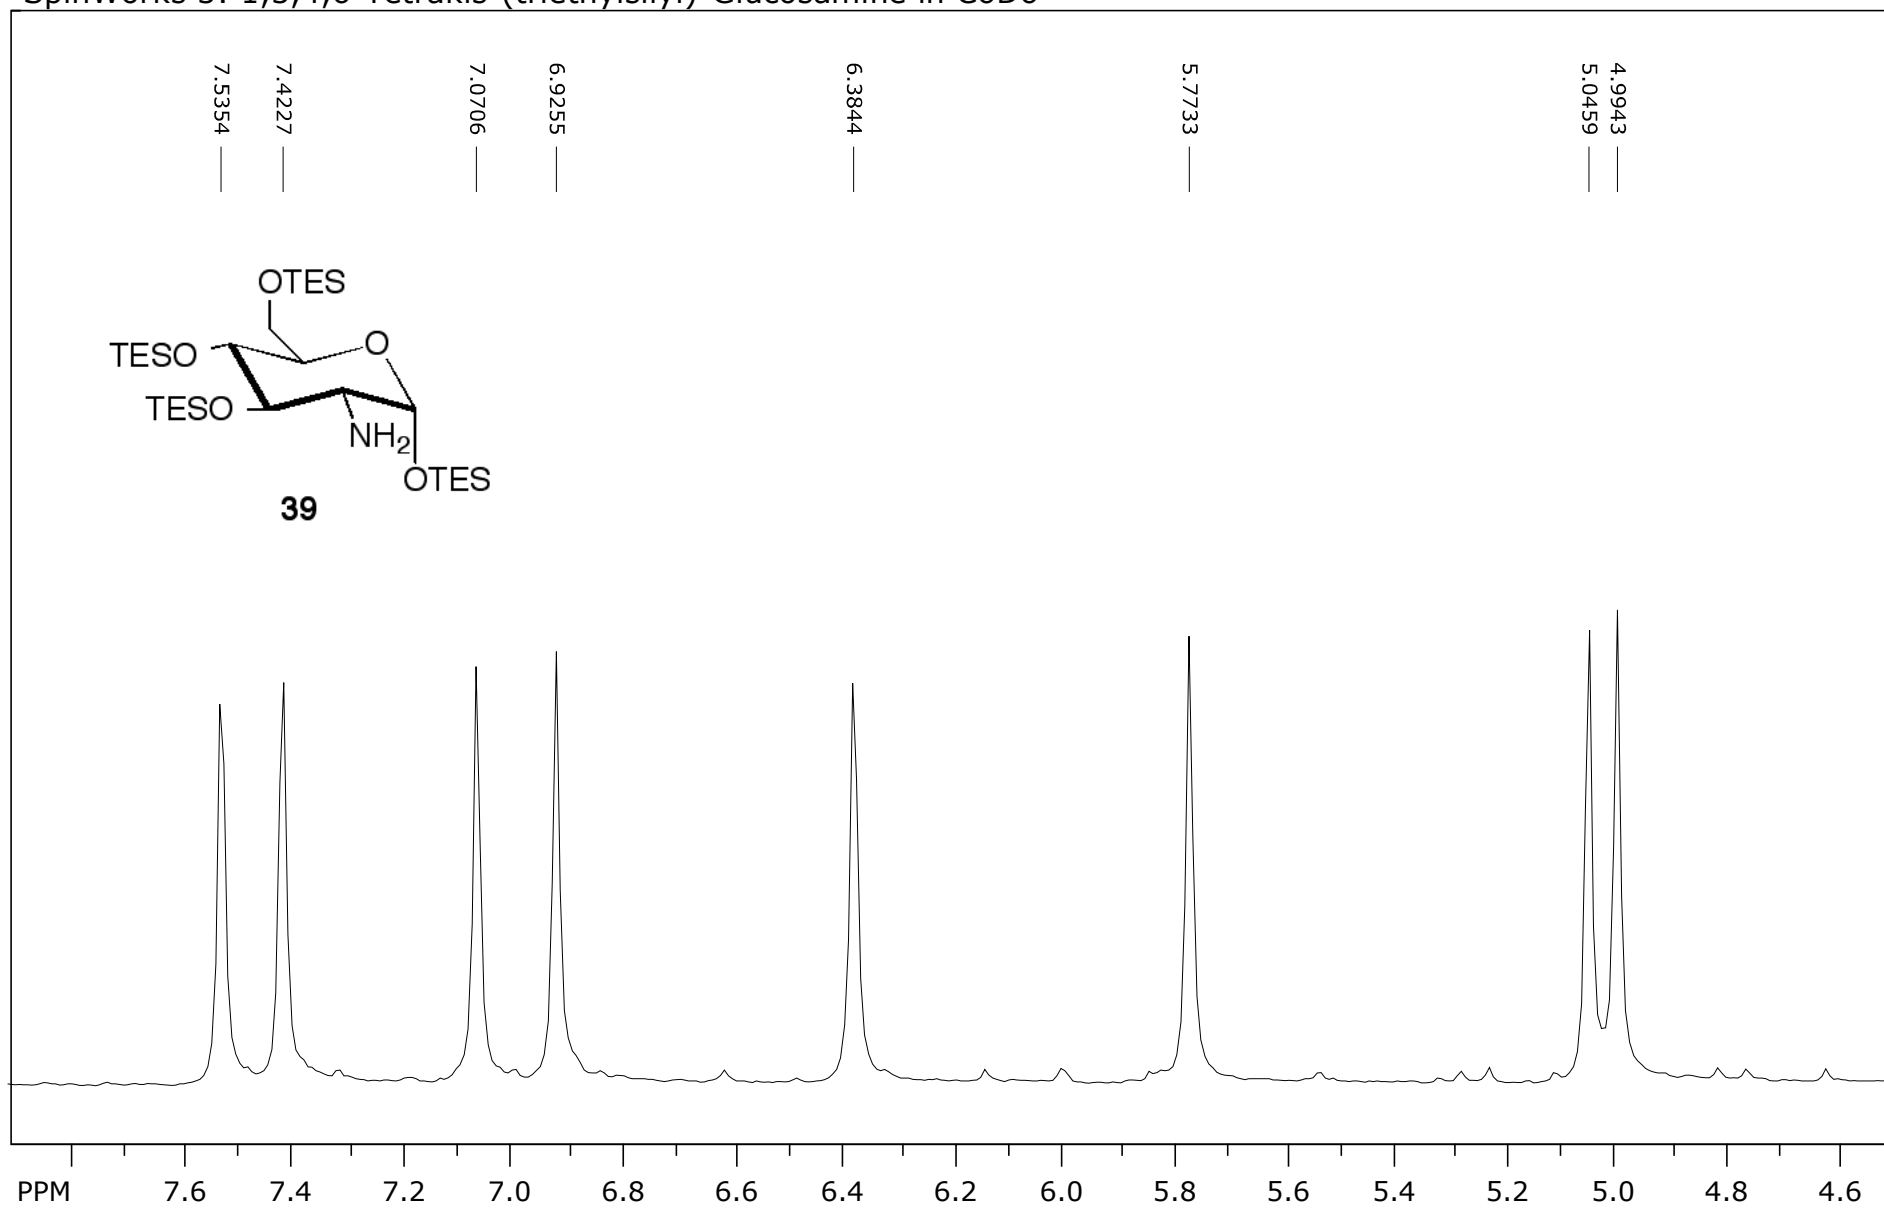

file: ...\_10\TES4GlcNH2 in d6 benzene\2\fid expt: <zpgg30>  
transmitter freq.: 125.749240 MHz  
time domain size: 65536 points  
width: 30030.03 Hz = 238.8088 ppm = 0.458222 Hz/pt  
number of scans: 256

freq. of 0 ppm: 125.736637 MHz  
processed size: 32768 complex points  
LB: 1.000 GF: 0.0000  
Hz/cm: 17.227 ppm/cm: 0.13699



SpinWorks 3: TES4Imine in d6-acetone; AV500 1H

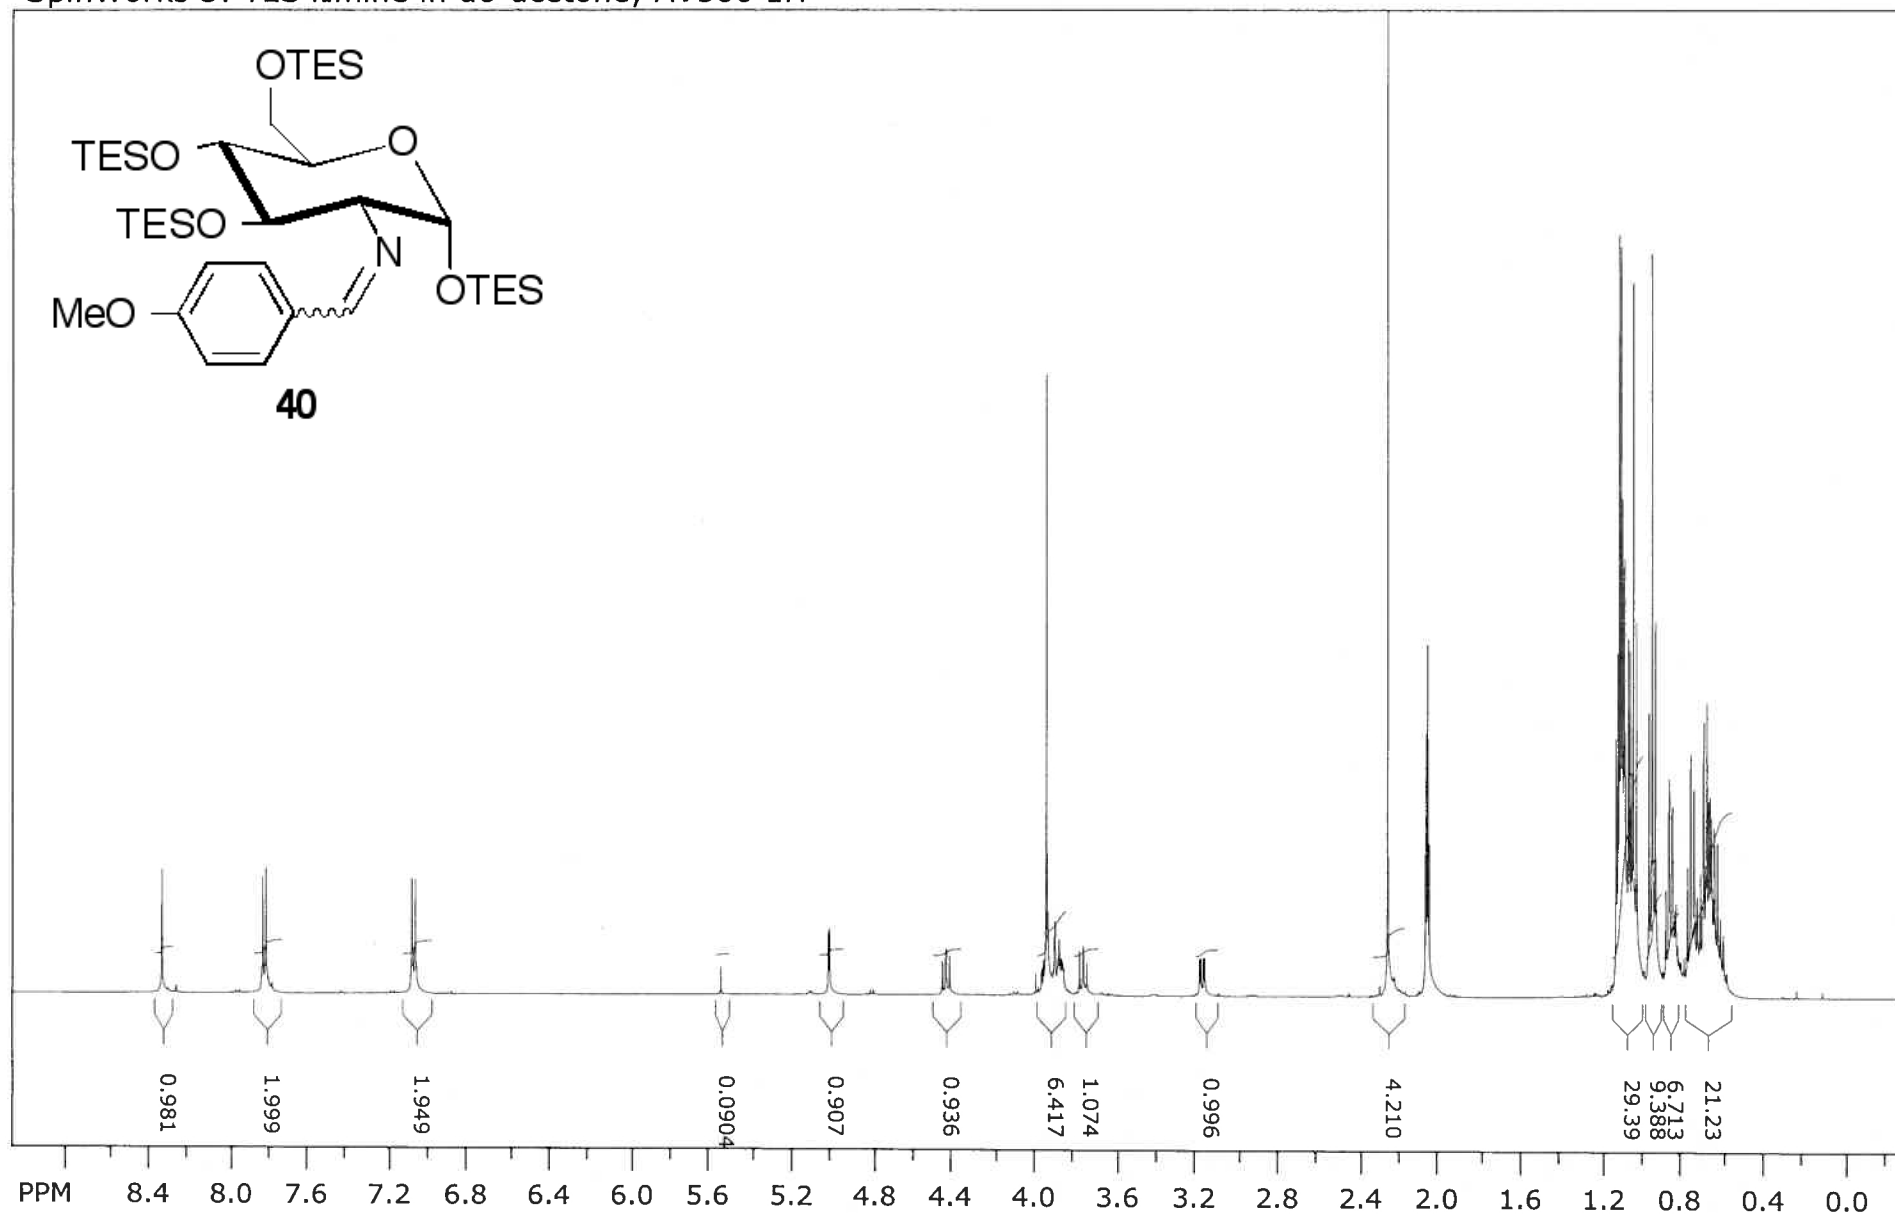

file: ...\\nmr\Posakony\nmr\imine\_7\_09\1\fid expt: <zg>  
 transmitter freq.: 500.049088 MHz  
 time domain size: 65536 points  
 width: 10330.58 Hz = 20.6591 ppm = 0.157632 Hz/pt  
 number of scans: 32

freq. of 0 ppm: 500.045964 MHz  
 processed size: 32768 complex points  
 LB: 0.300 GF: 0.0000  
 Hz/cm: 187.772 ppm/cm: 0.37551

SpinWorks 3: TES4Imine in d6-acetone; AV500 1H

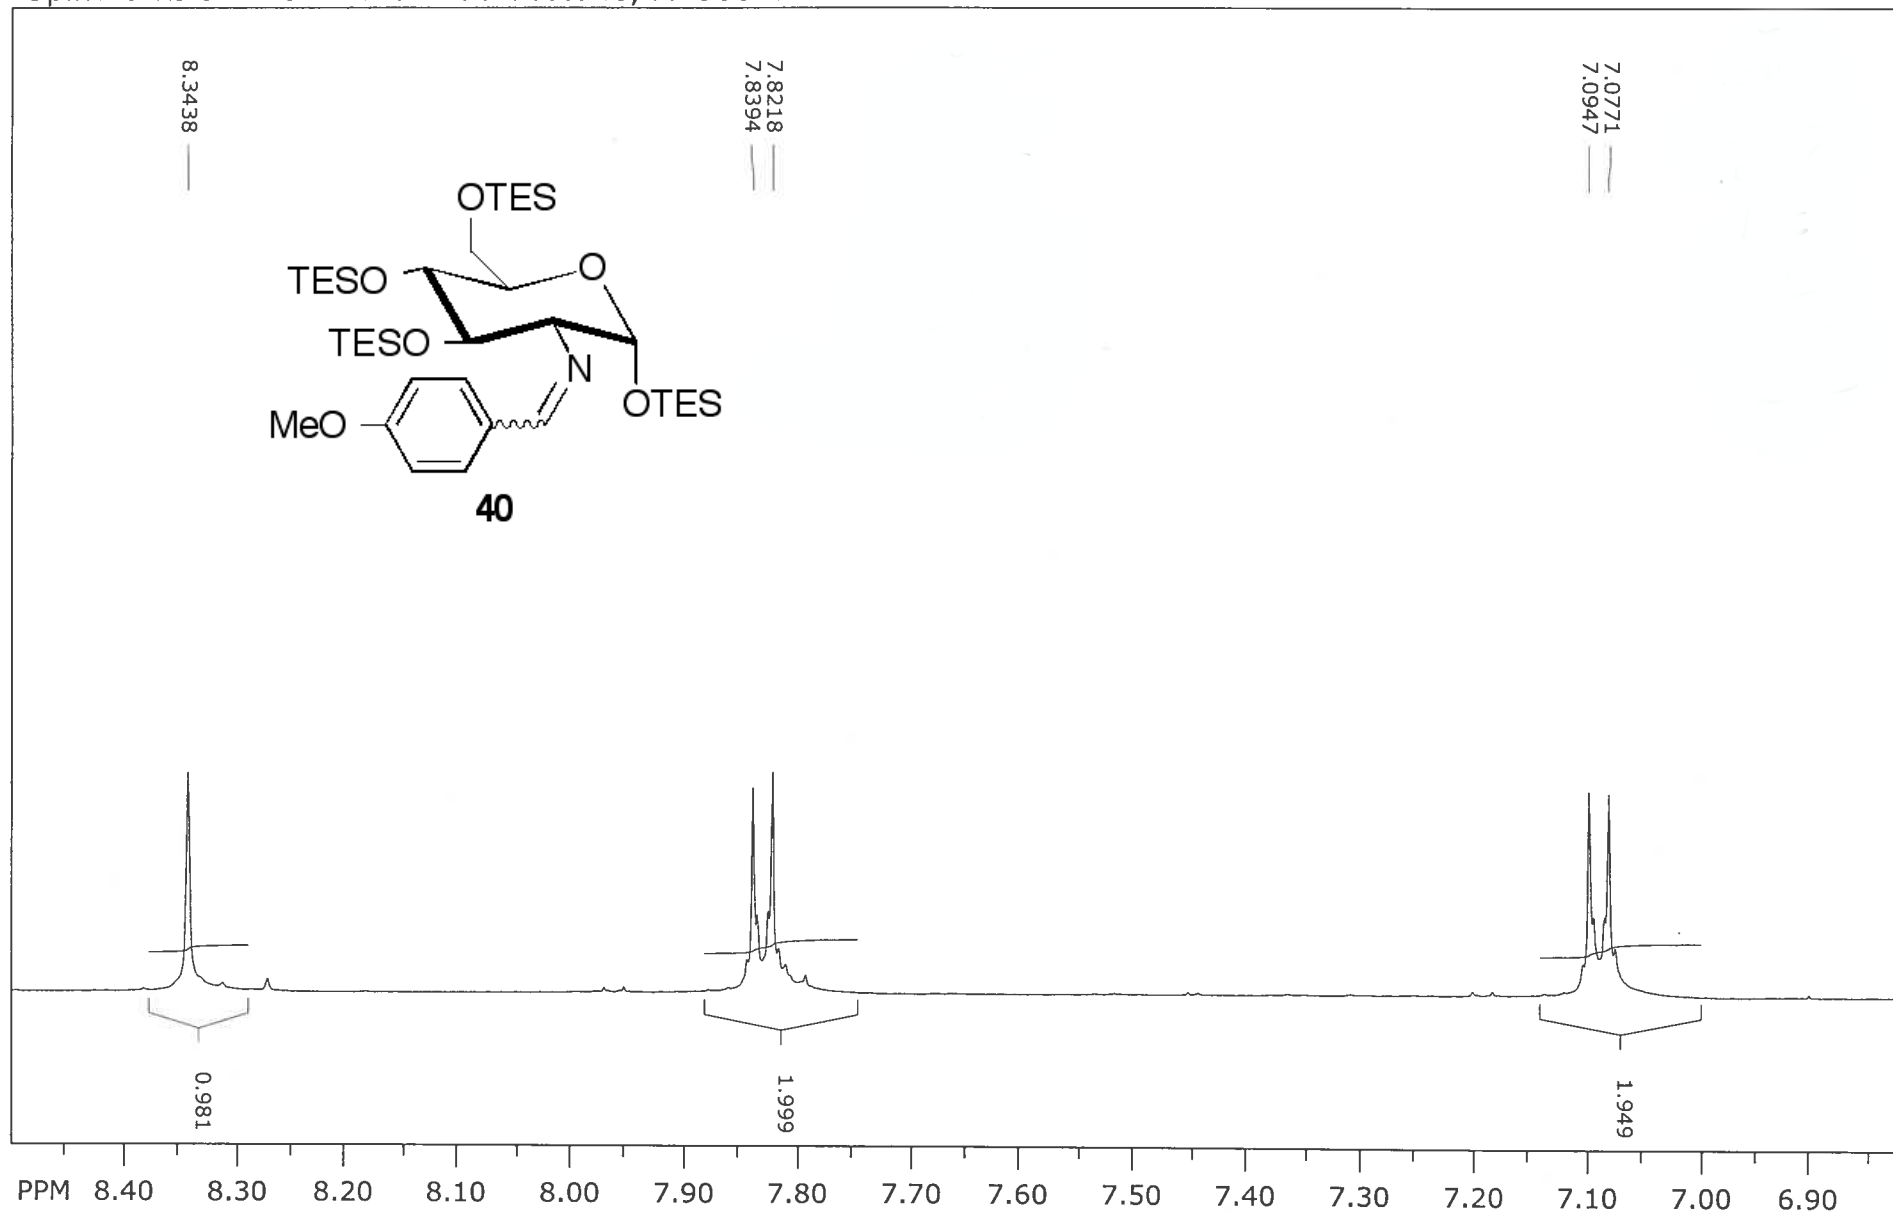

file: ...\\nmr\Posakony\nmr\imine\_7\_09\1\fid expt: <zg>  
 transmitter freq.: 500.049088 MHz  
 time domain size: 65536 points  
 width: 10330.58 Hz = 20.6591 ppm = 0.157632 Hz/pt  
 number of scans: 32

freq. of 0 ppm: 500.045964 MHz  
 processed size: 32768 complex points  
 LB: 0.300 GF: 0.0000  
 Hz/cm: 33.677 ppm/cm: 0.06735

SpinWorks 3: TES4Imine in d6-acetone; AV500 1H

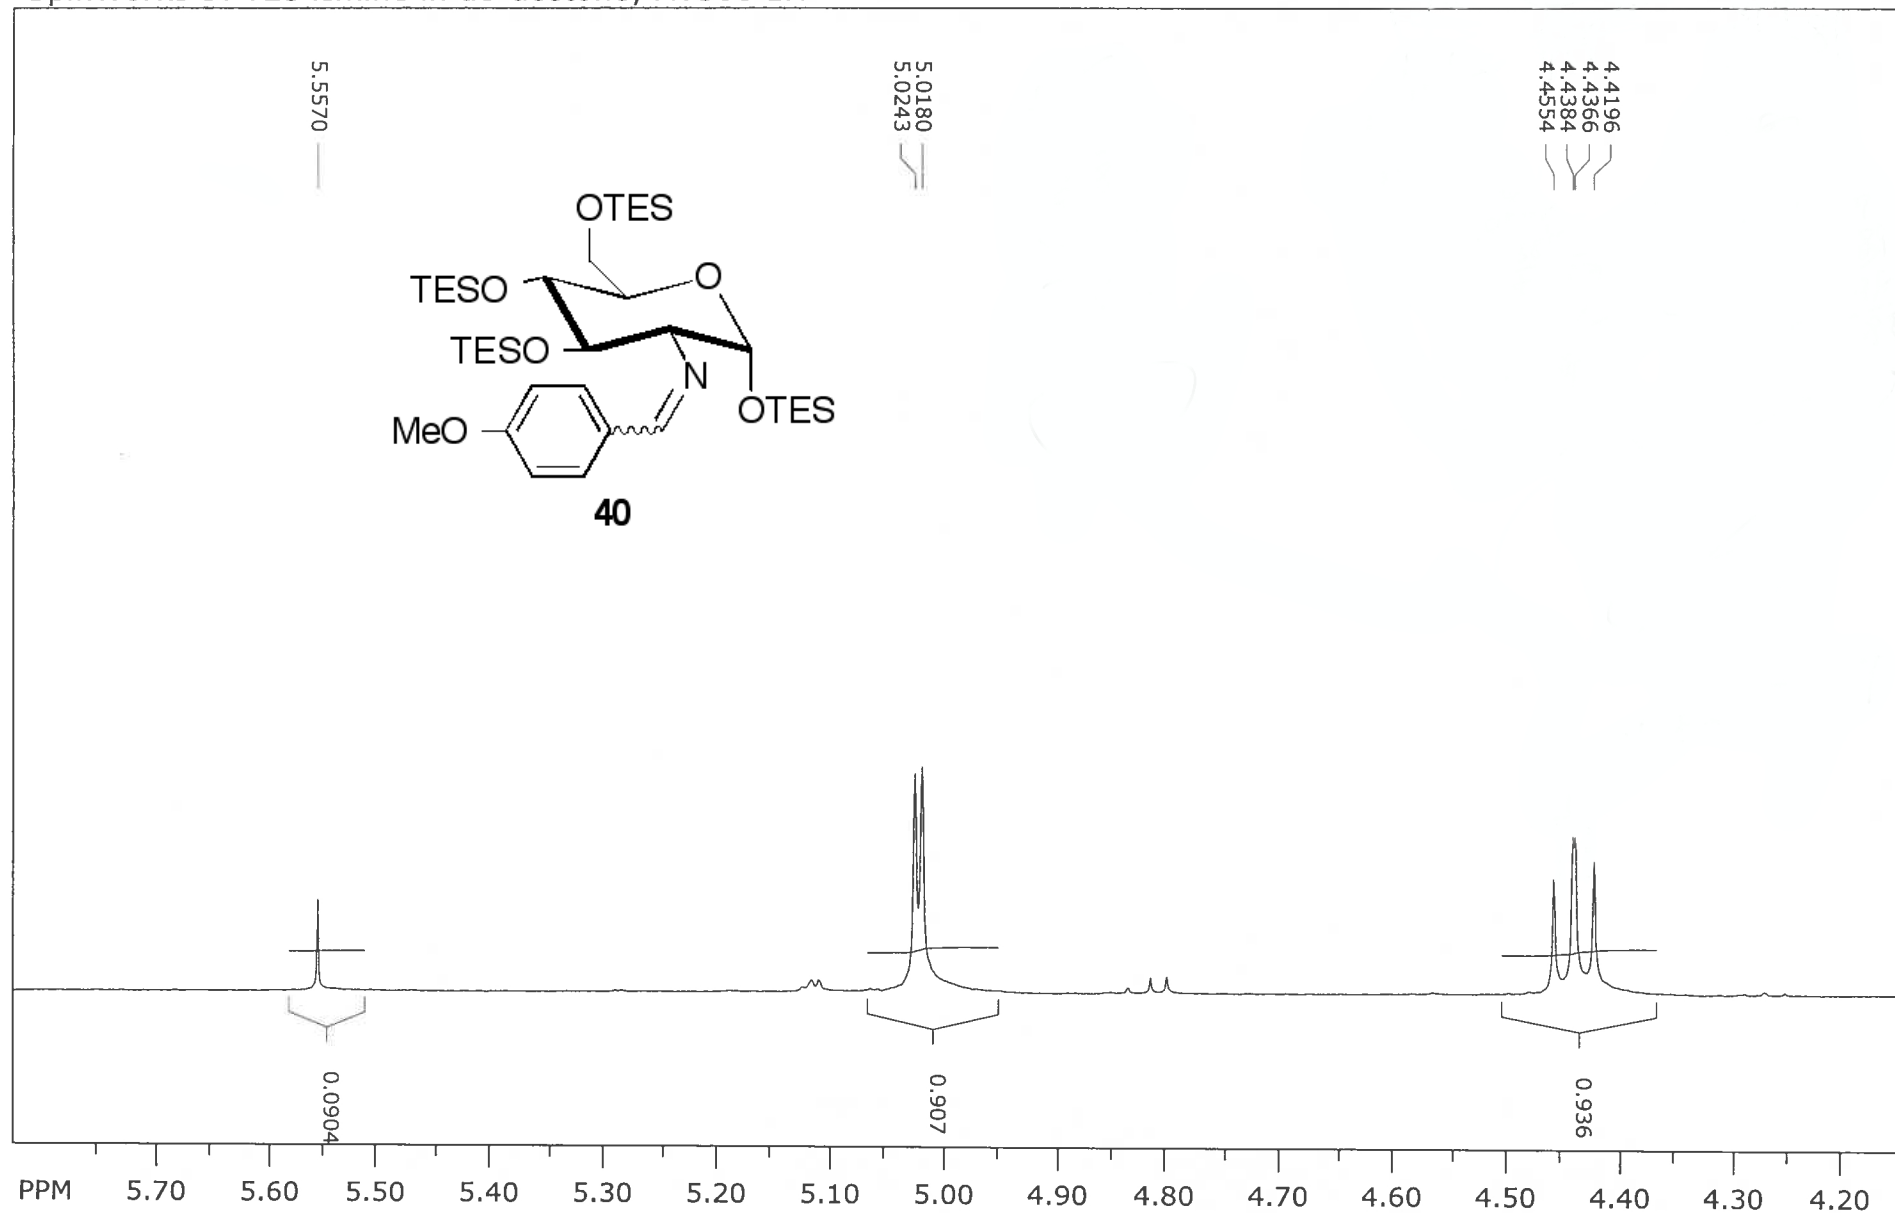

file: ...\\nmr\Posakony\nmr\imine\_7\_09\1\fid expt: <zg>  
 transmitter freq.: 500.049088 MHz  
 time domain size: 65536 points  
 width: 10330.58 Hz = 20.6591 ppm = 0.157632 Hz/pt  
 number of scans: 32

freq. of 0 ppm: 500.045964 MHz  
 processed size: 32768 complex points  
 LB: 0.300 GF: 0.0000  
 Hz/cm: 33.677 ppm/cm: 0.06735



SpinWorks 3: TES4Imine in d6-acetone; AV500 1H

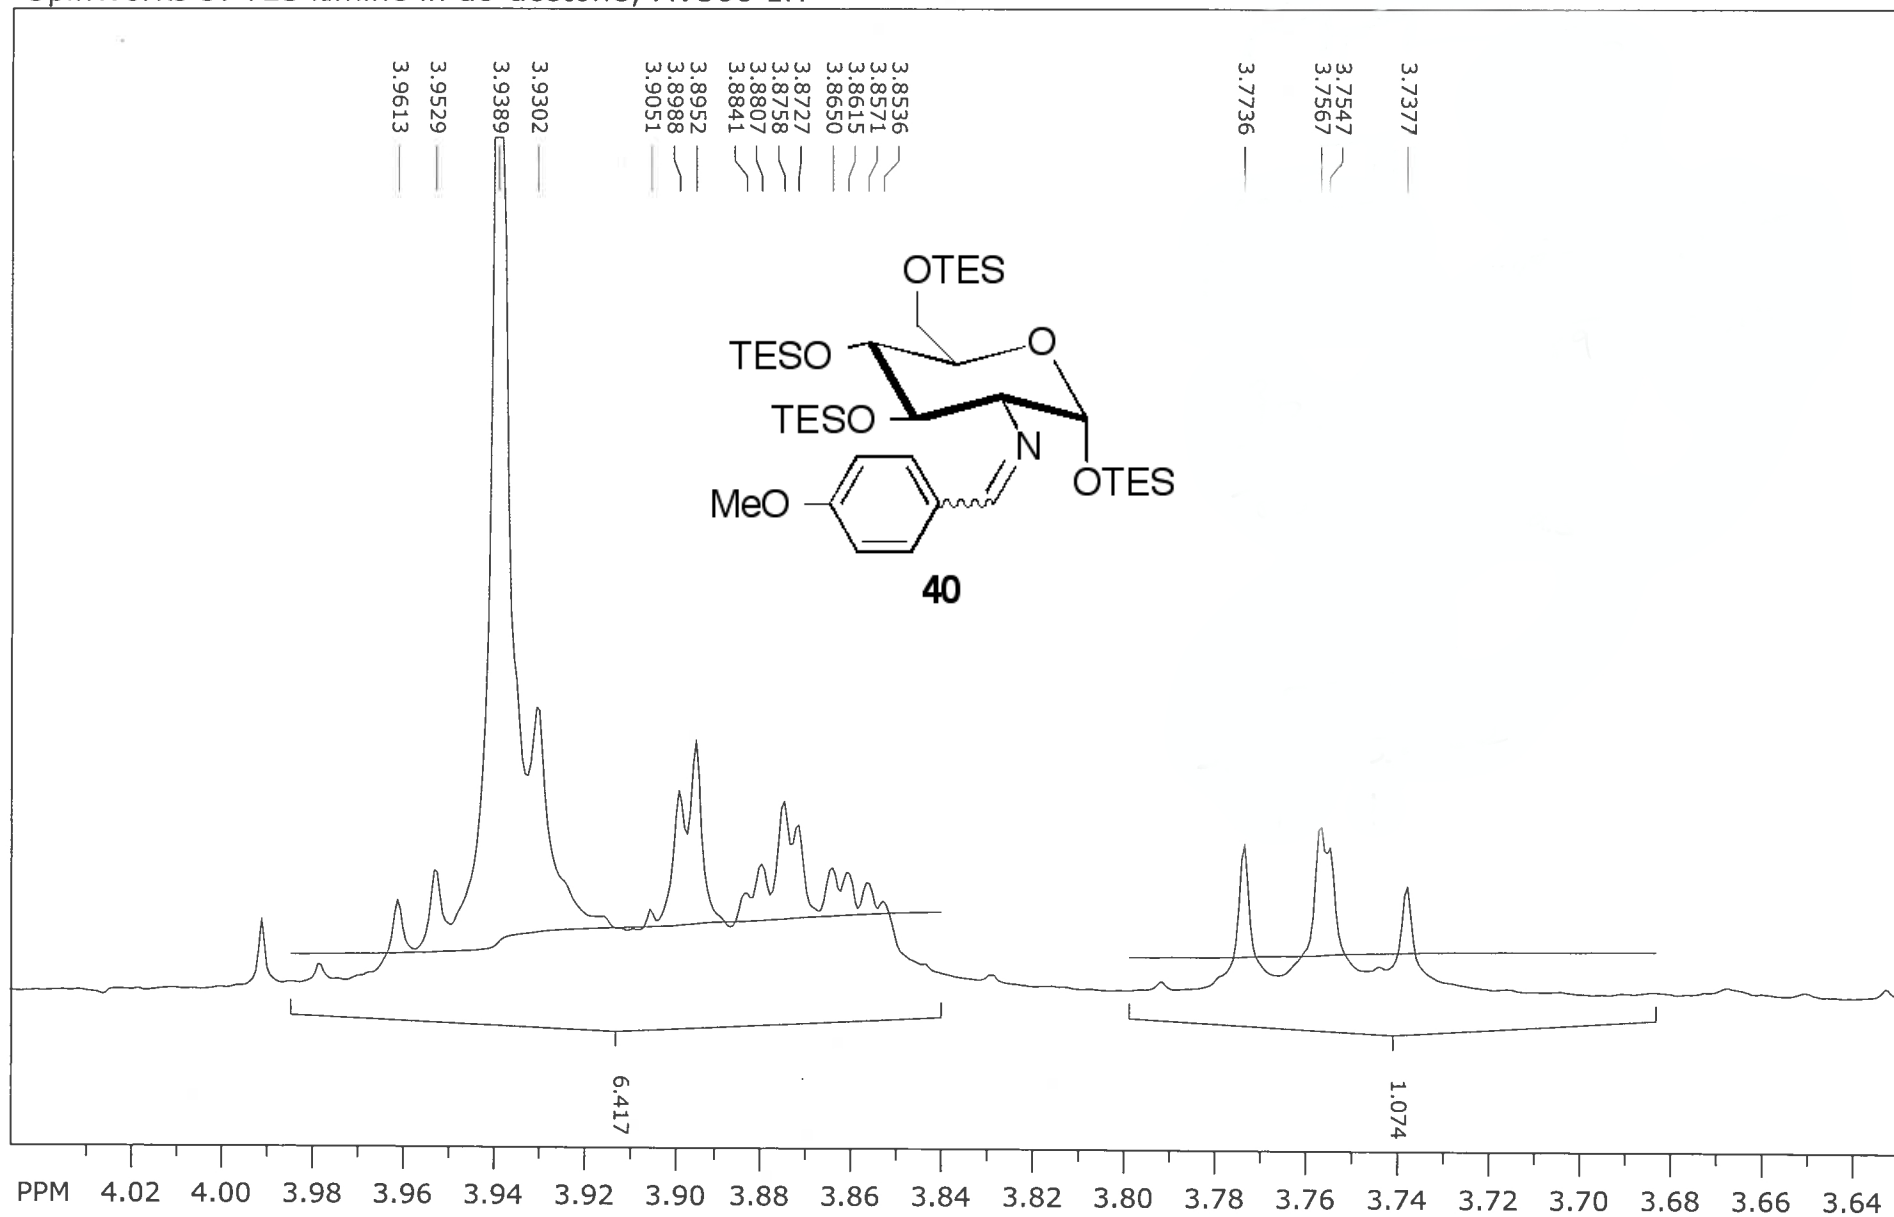

file: ...\\nmr\Posakony\nmr\imine\_7\_09\1\fid expt: <zg>  
 transmitter freq.: 500.049088 MHz  
 time domain size: 65536 points  
 width: 10330.58 Hz = 20.6591 ppm = 0.157632 Hz/pt  
 number of scans: 32

freq. of 0 ppm: 500.045964 MHz  
 processed size: 32768 complex points  
 LB: 0.300 GF: 0.0000  
 Hz/cm: 8.375 ppm/cm: 0.01675

SpinWorks 3: TES4Imine in d6-acetone; AV500 1H

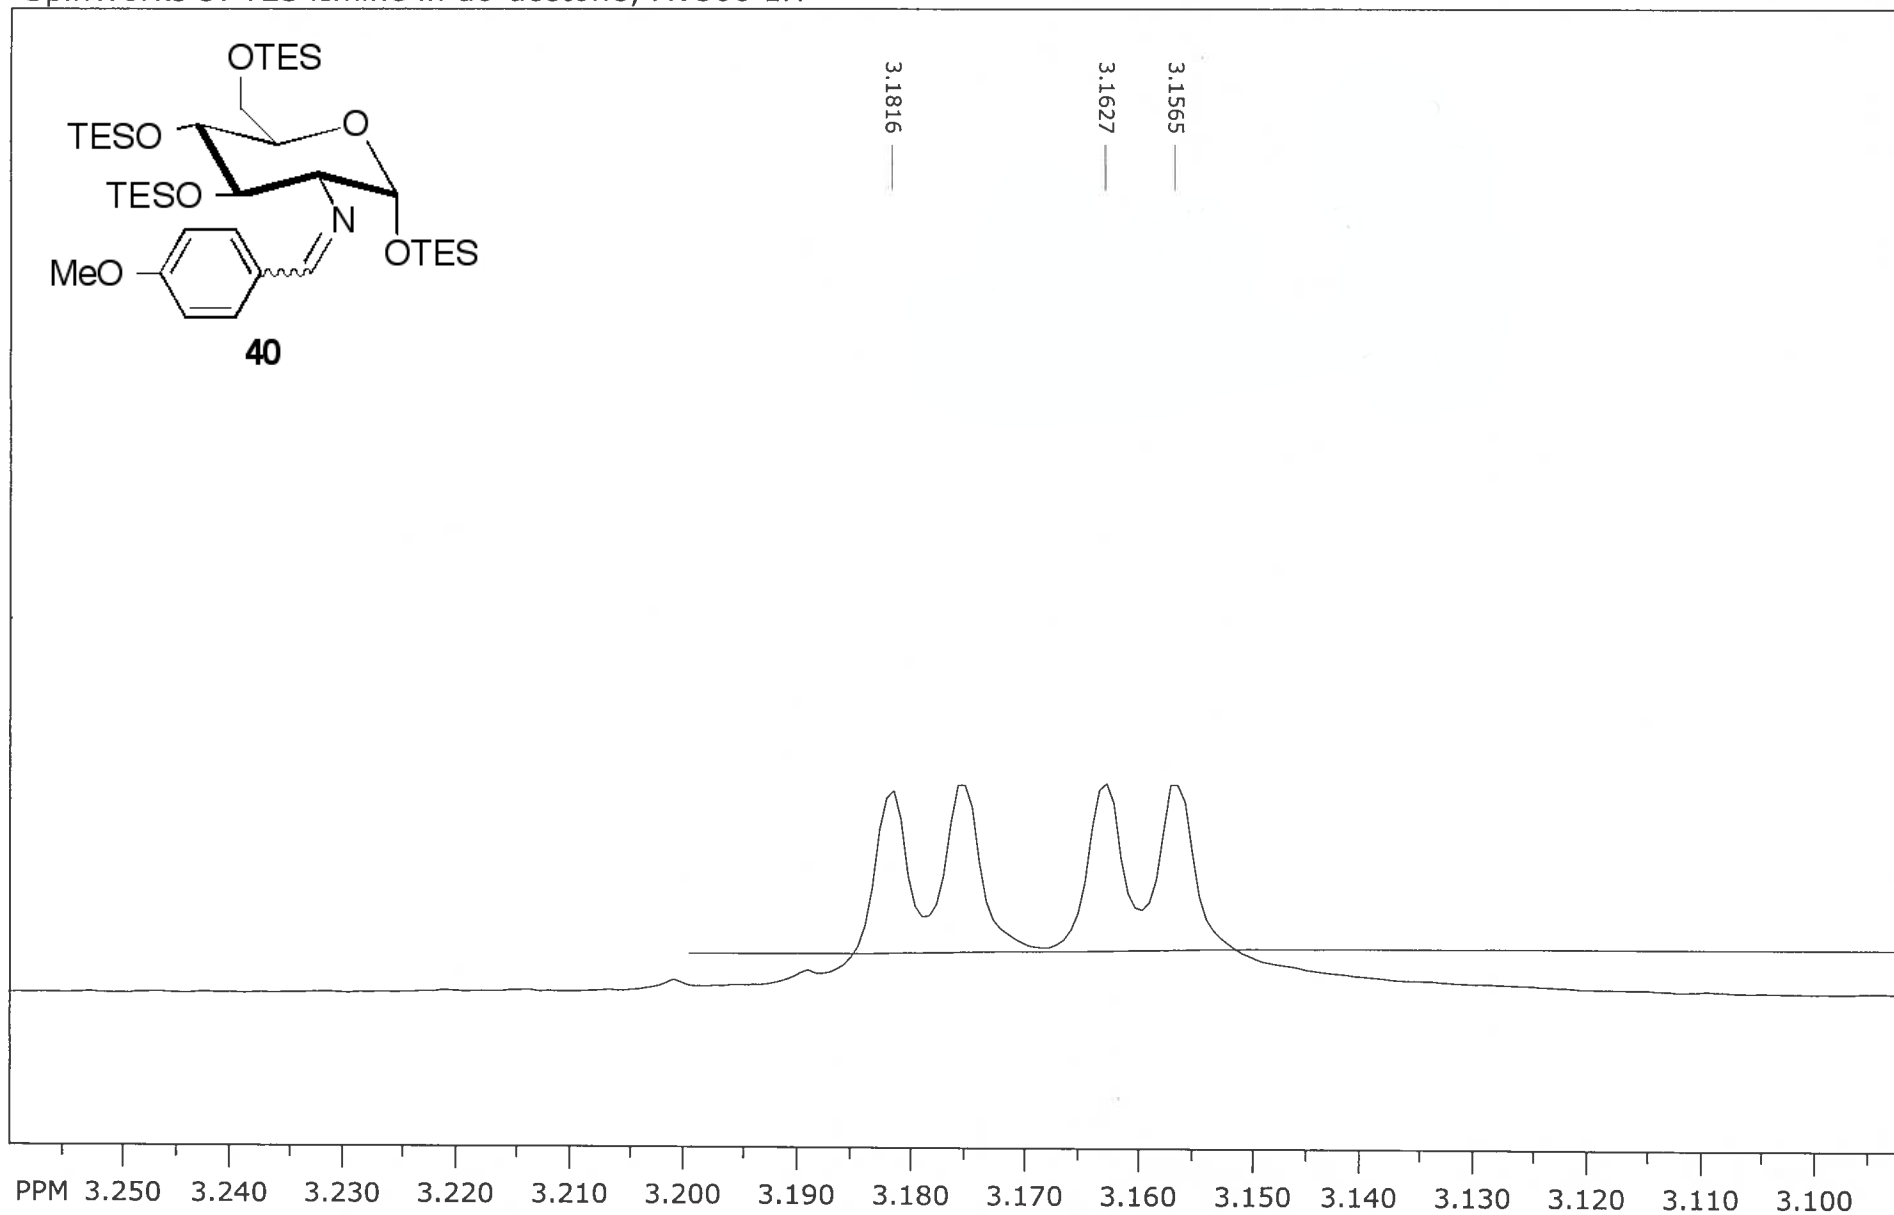

file: ...\\nrmr\Posakony\nmr\imine\_7\_09\1\fid expt: <zg>  
transmitter freq.: 500.049088 MHz  
time domain size: 65536 points  
width: 10330.58 Hz = 20.6591 ppm = 0.157632 Hz/pt  
number of scans: 32

freq. of 0 ppm: 500.045964 MHz  
processed size: 32768 complex points  
LB: 0.300 GF: 0.0000  
Hz/cm: 3.358 ppm/cm: 0.00671

## SpinWorks 3: TES4Imine in d6-acetone; AV500 1H

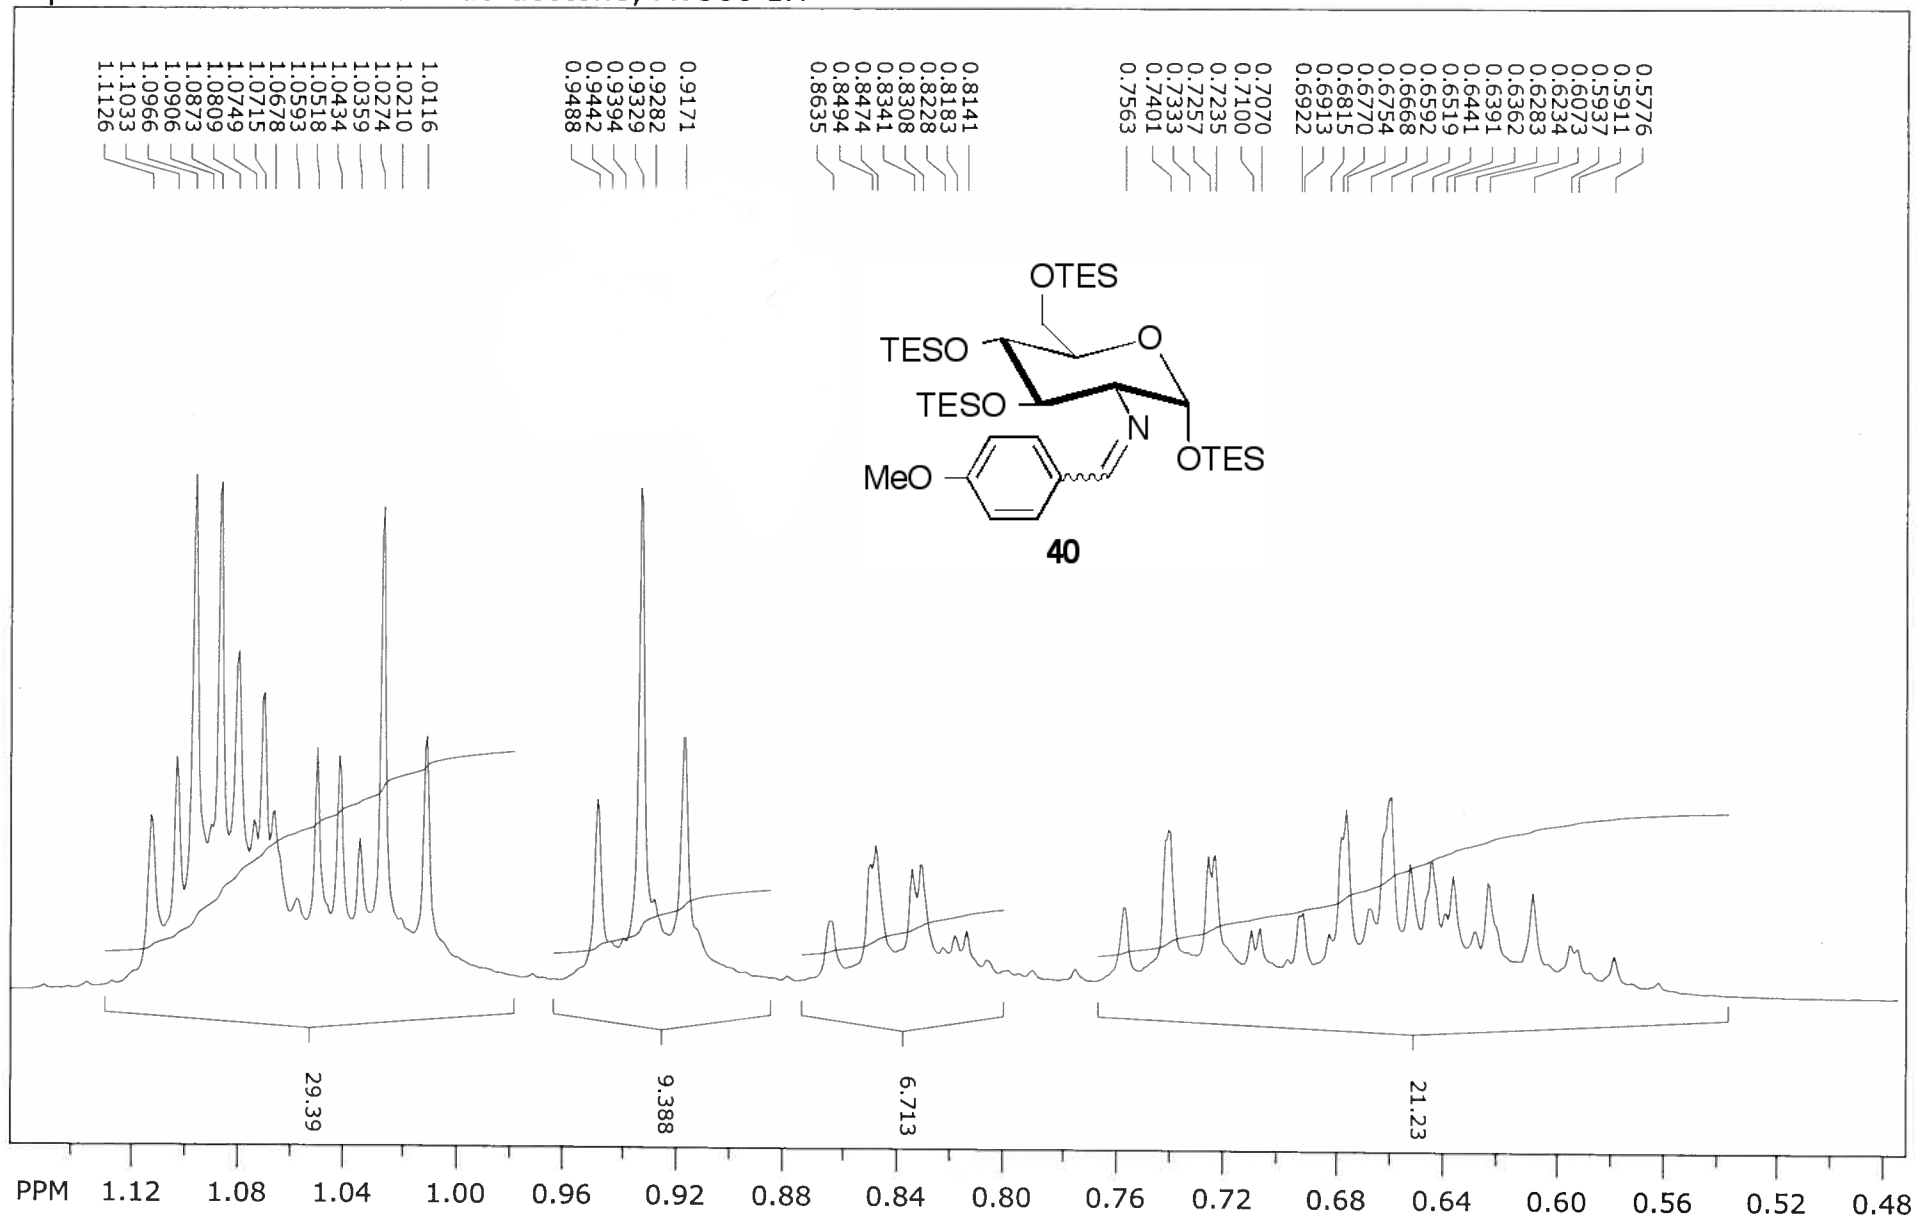

file: ...\\nrm\Posakony\nmr\imine\_7\_09\1\fid expt: <zg>  
 transmitter freq.: 500.049088 MHz  
 time domain size: 65536 points  
 width: 10330.58 Hz = 20.6591 ppm = 0.157632 Hz/pt  
 number of scans: 32

freq. of 0 ppm: 500.045964 MHz  
 processed size: 32768 complex points  
 LB: 0.300 GF: 0.0000  
 Hz/cm: 13.818 ppm/cm: 0.02763

SpinWorks 3: TES4\_Imine\_CD3CN; AV500 13C

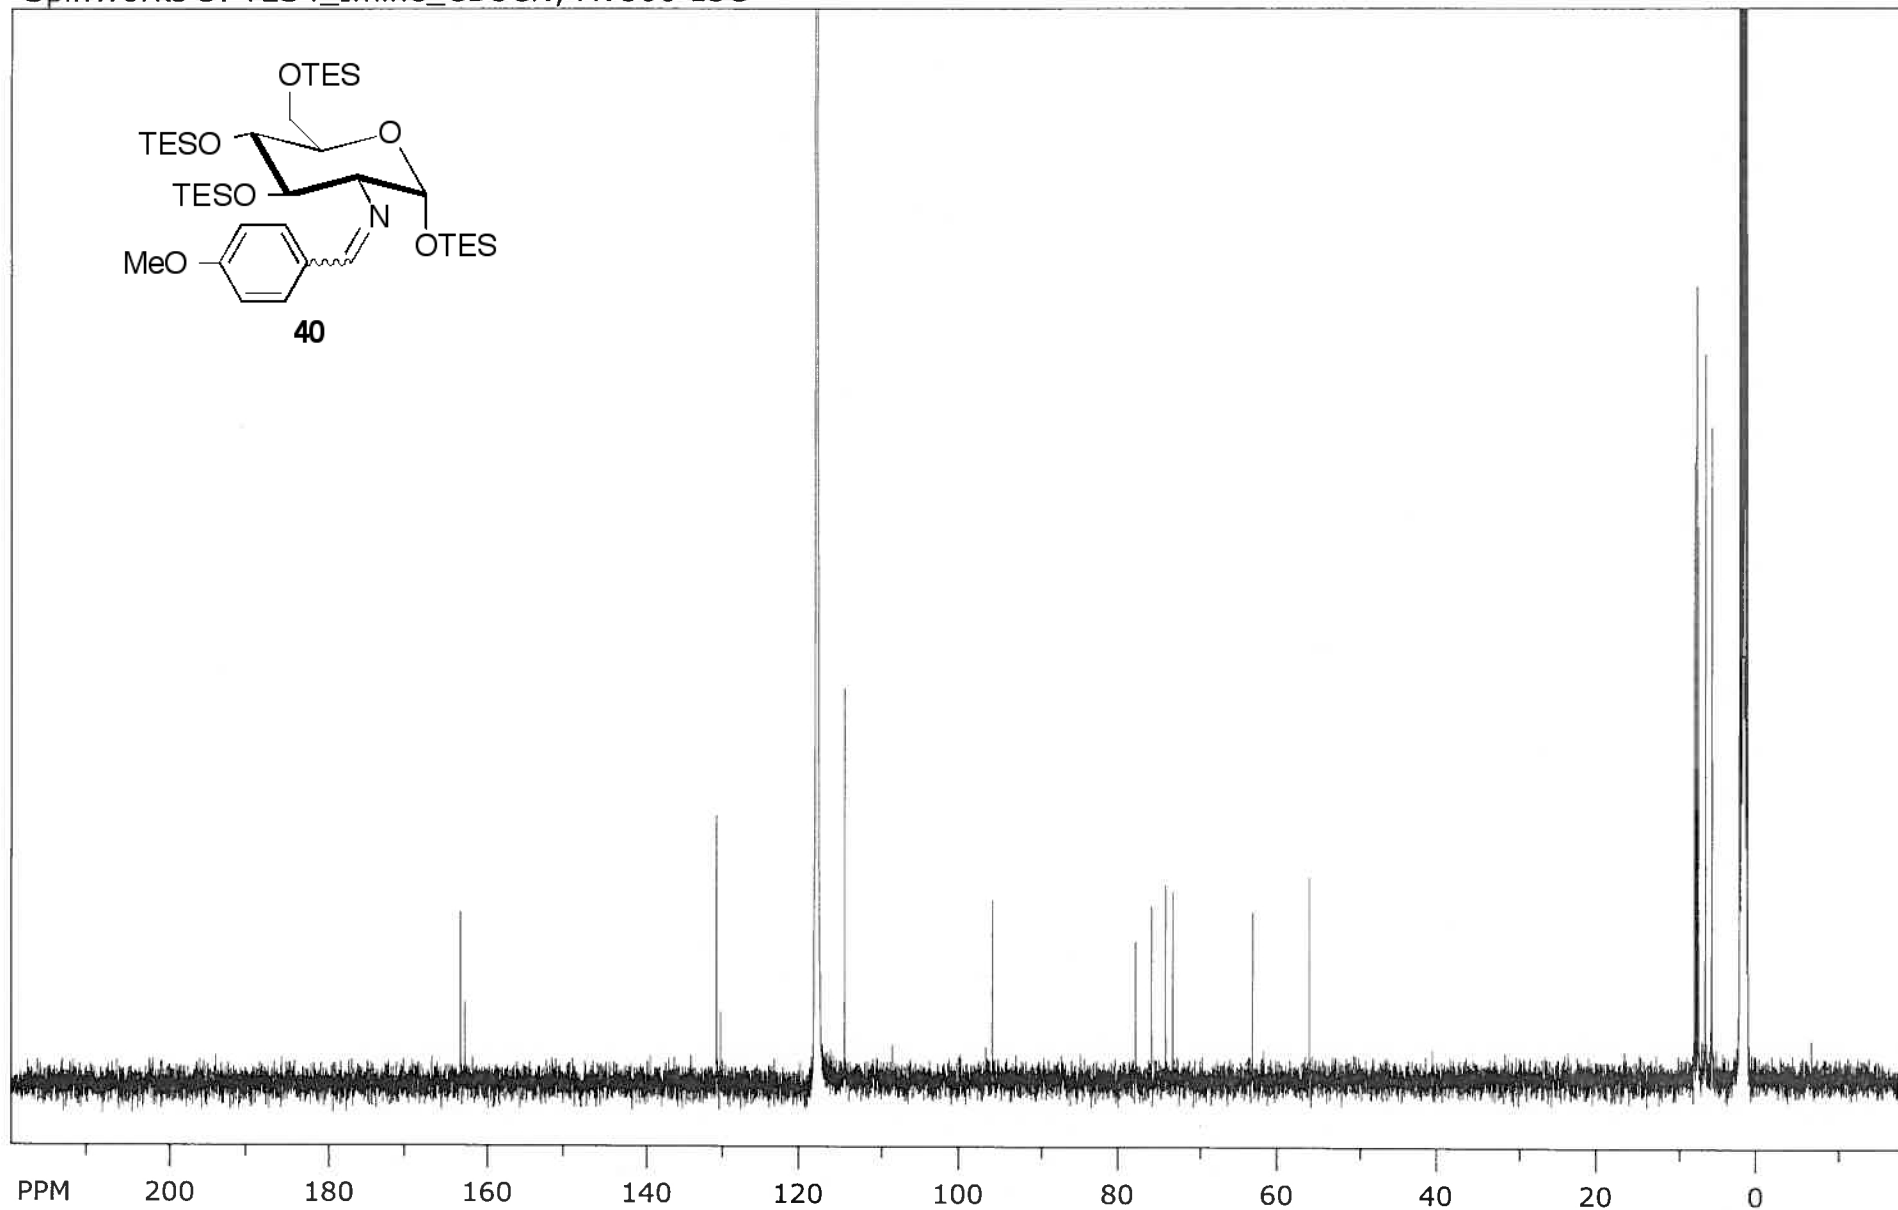

file: ...\\nmr\Posakony\nmr\imine\_7\_09\2\fid expt: <zpgg30>  
transmitter freq.: 125.749240 MHz  
time domain size: 65536 points  
width: 30030.03 Hz = 238.8088 ppm = 0.458222 Hz/pt  
number of scans: 2700

freq. of 0 ppm: 125.736558 MHz  
processed size: 32768 complex points  
LB: 1.000 GF: 0.0000  
Hz/cm: 1201.201 ppm/cm: 9.55235

SpinWorks 3: TES4\_Imine\_CD3CN; AV500 13C

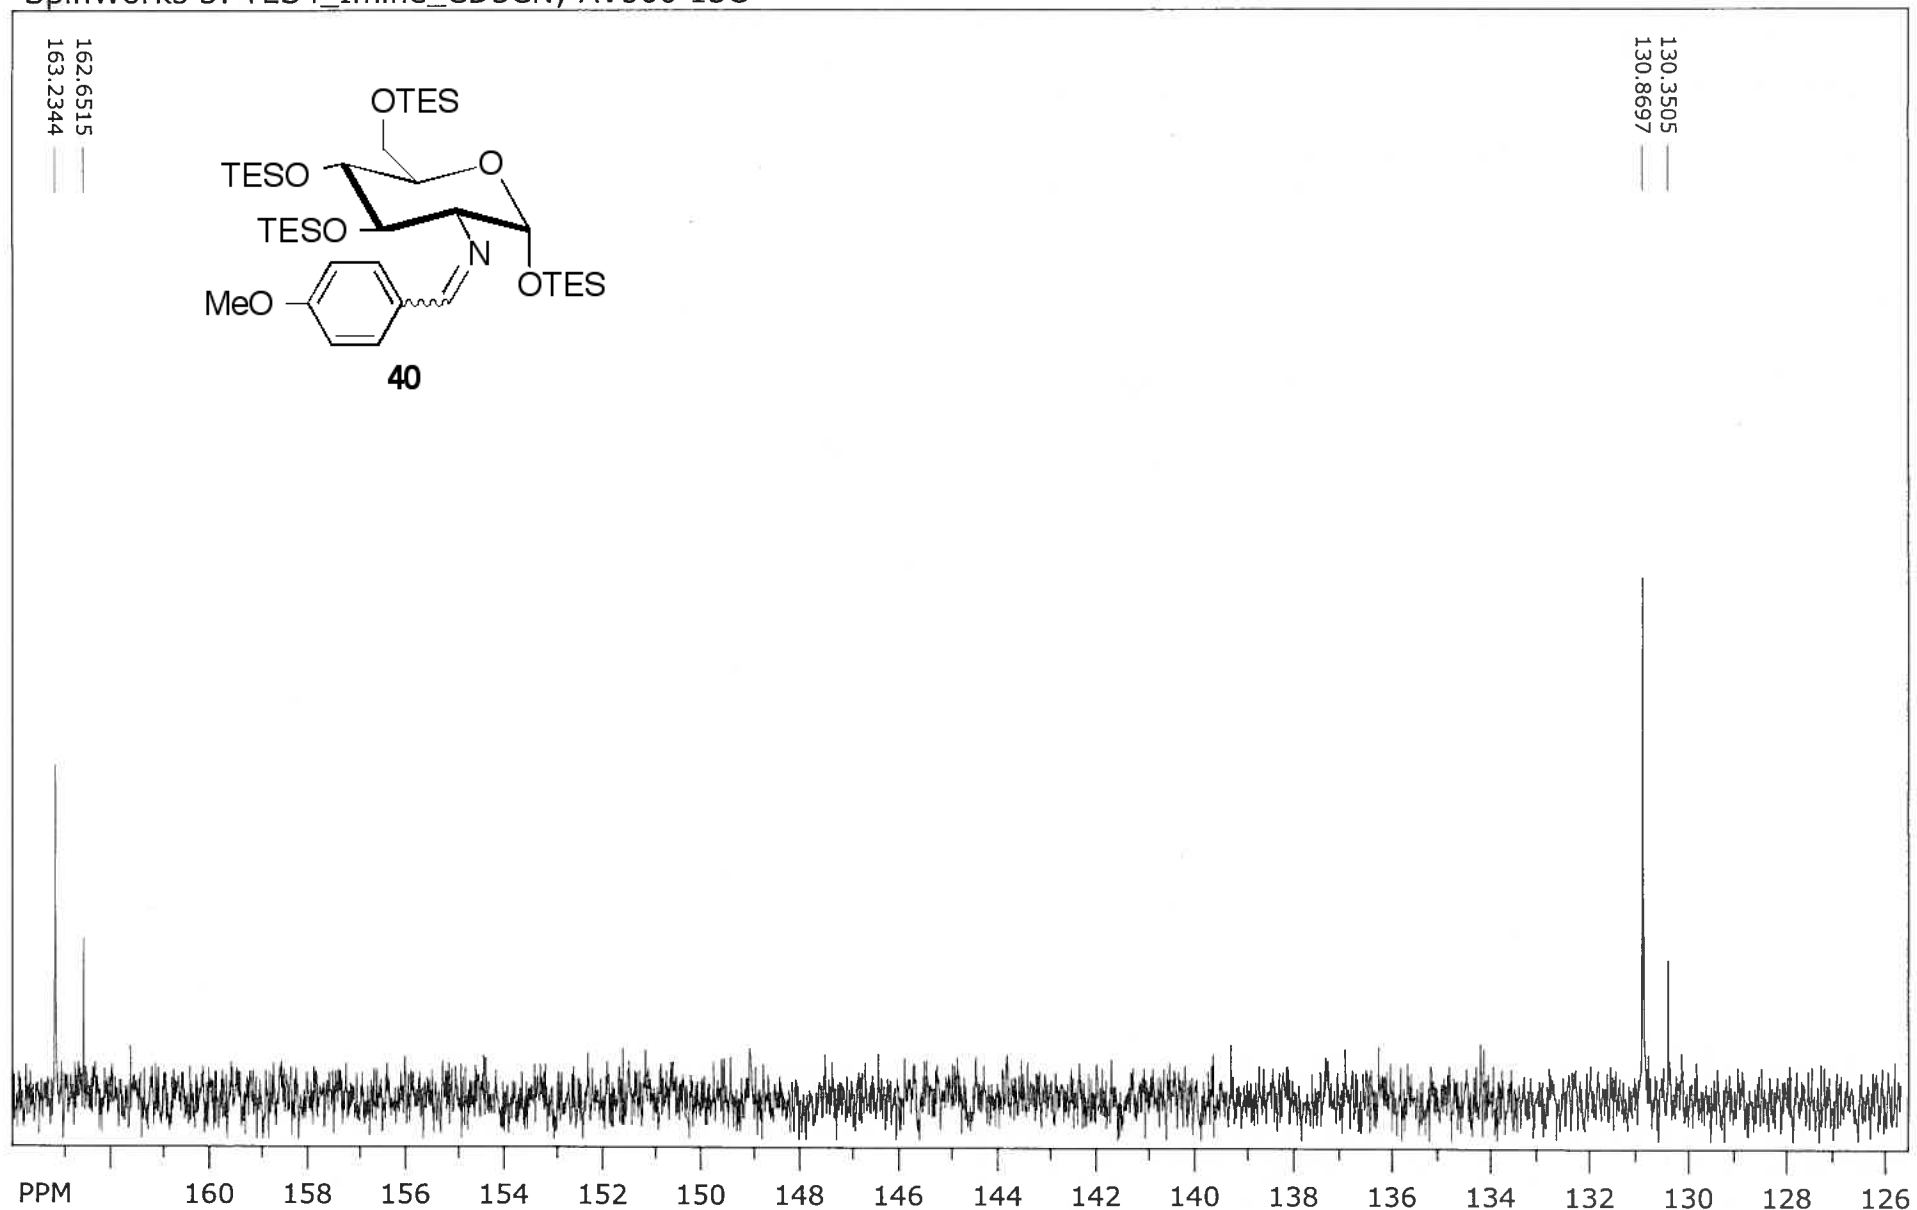

file: ...\\nmr\Posakony\nmr\imine\_7\_09\2\fid expt: <zpgg30>  
transmitter freq.: 125.749240 MHz  
time domain size: 65536 points  
width: 30030.03 Hz = 238.8088 ppm = 0.458222 Hz/pt  
number of scans: 2700

freq. of 0 ppm: 125.736558 MHz  
processed size: 32768 complex points  
LB: 1.000 GF: 0.0000  
Hz/cm: 193.713 ppm/cm: 1.54047

SpinWorks 3: TES4\_Imine\_CD3CN; AV500 13C

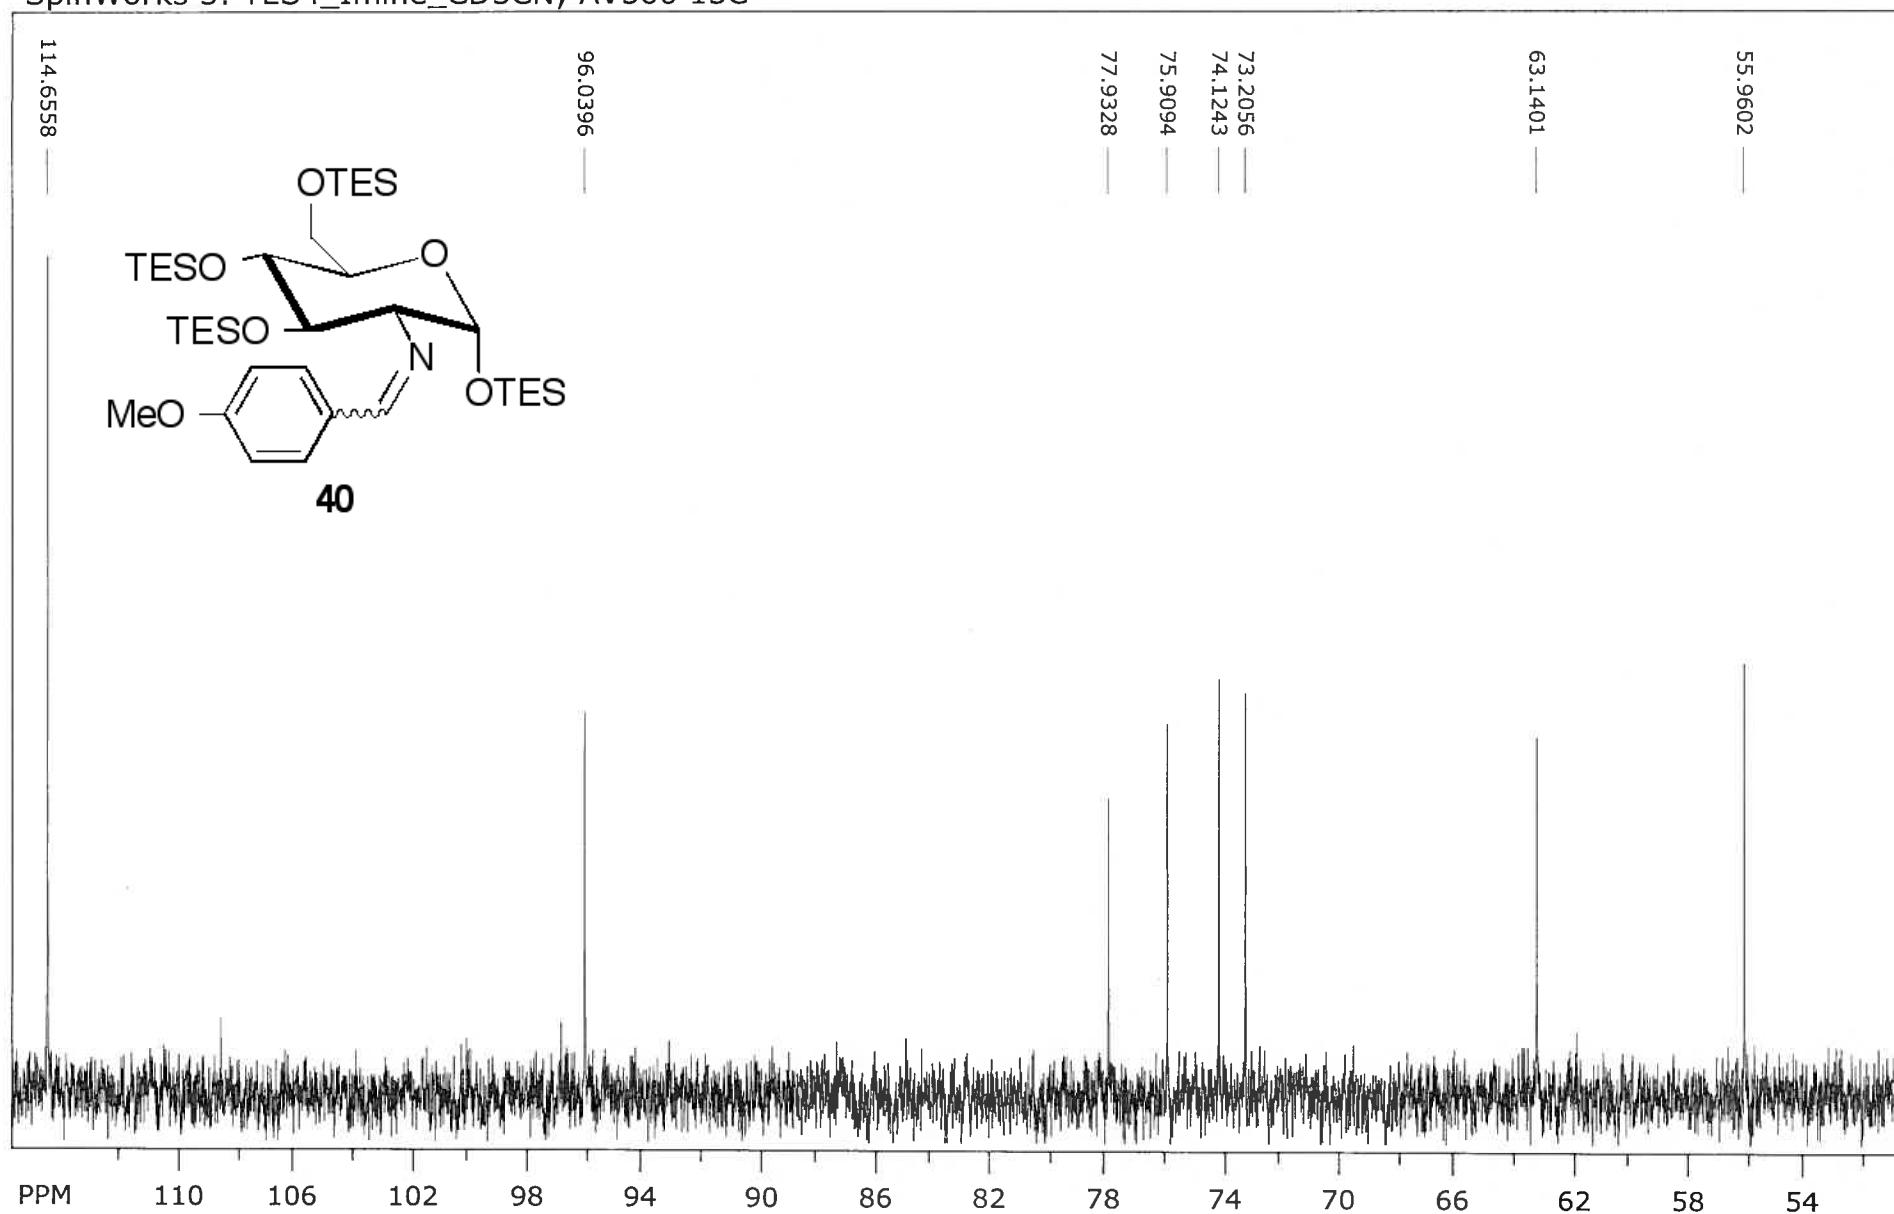

file: ...\\nmr\Posakony\nmr\imine\_7\_09\2\fid expt: <zgpg30>  
 transmitter freq.: 125.749240 MHz  
 time domain size: 65536 points  
 width: 30030.03 Hz = 238.8088 ppm = 0.458222 Hz/pt  
 number of scans: 2700

freq. of 0 ppm: 125.736558 MHz  
 processed size: 32768 complex points  
 LB: 1.000 GF: 0.0000  
 Hz/cm: 328.588 ppm/cm: 2.61304

SpinWorks 3: TES4\_Imine\_CD3CN; AV500 13C

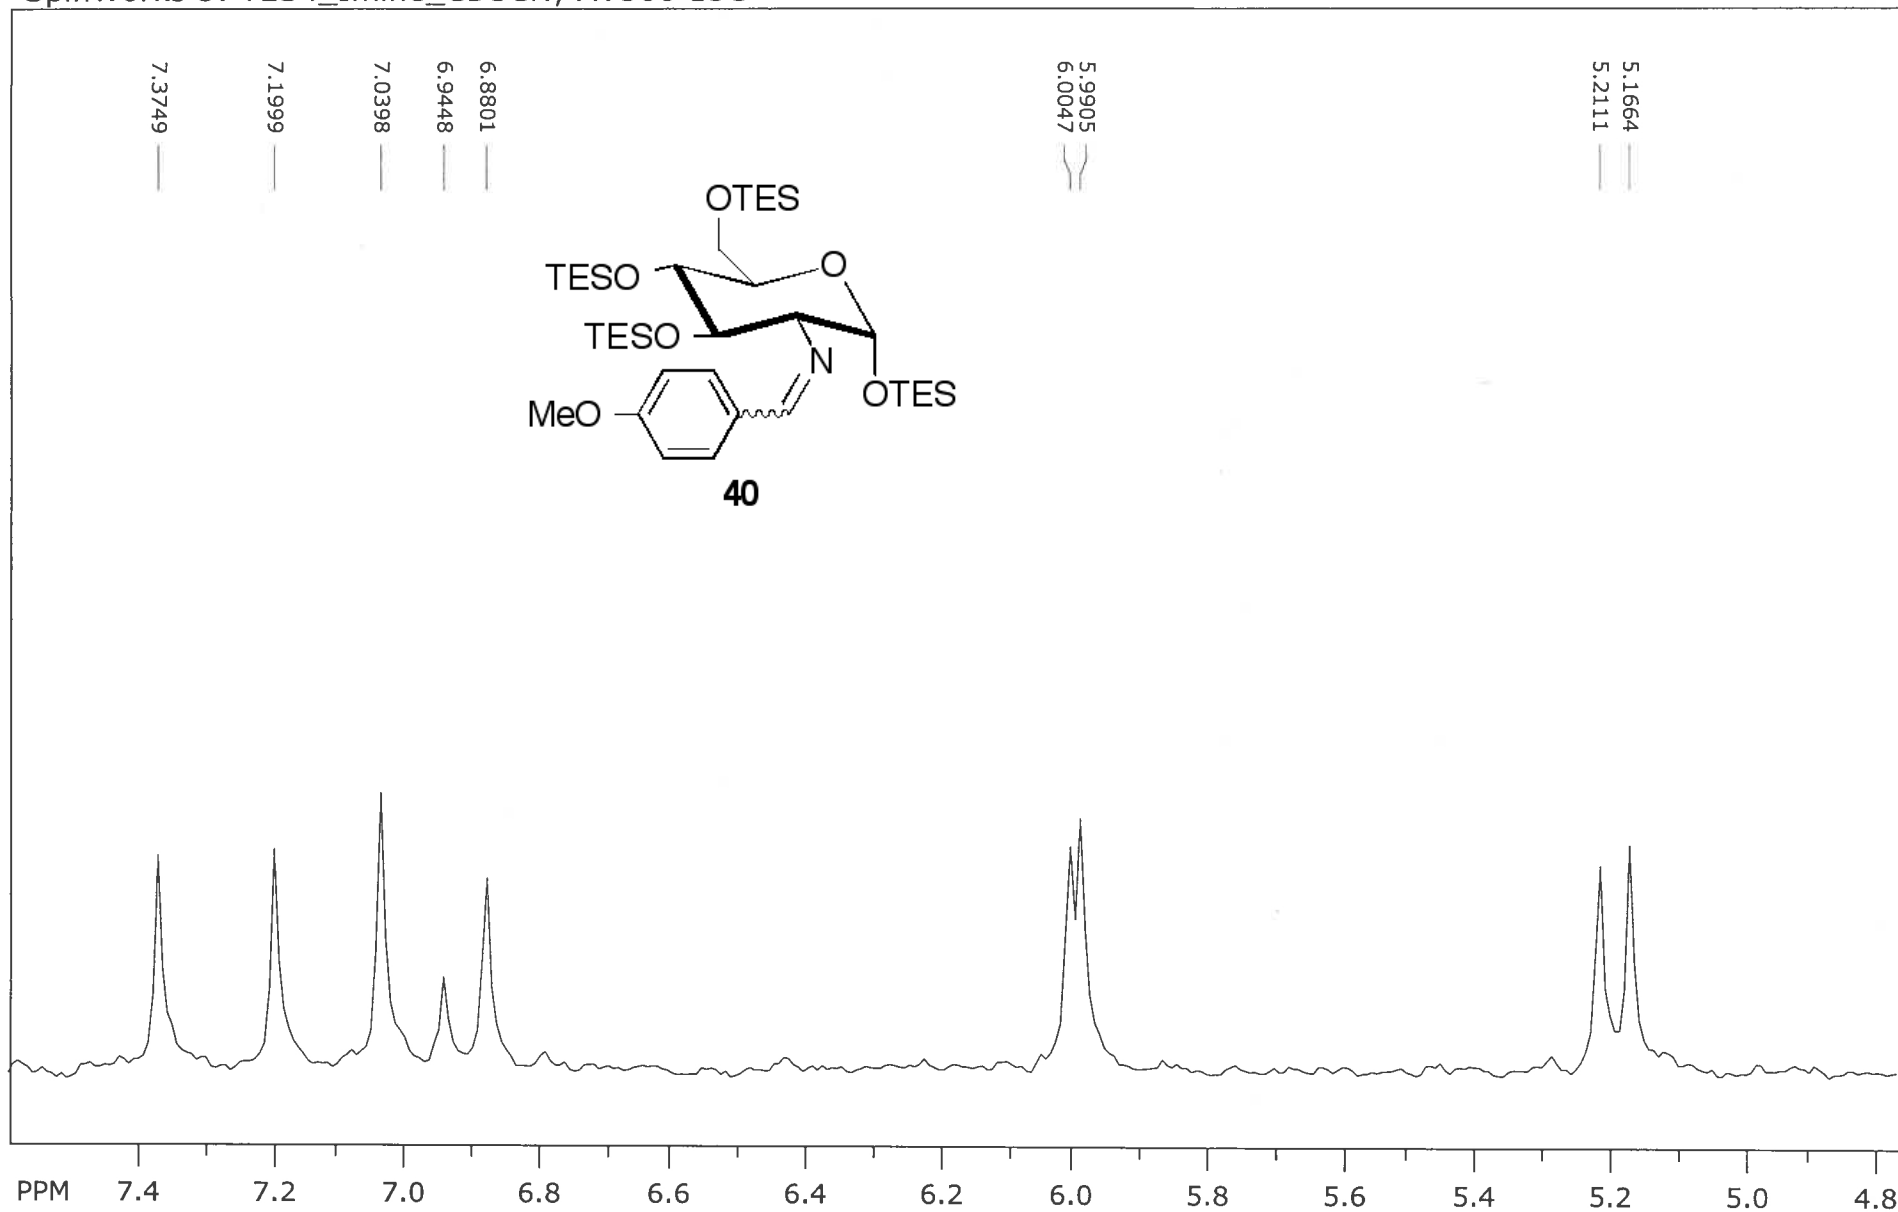

file: ...\\nmr\Posakony\nmr\imine\_7\_09\2\fid expt: <zpgg30>  
 transmitter freq.: 125.749240 MHz  
 time domain size: 65536 points  
 width: 30030.03 Hz = 238.8088 ppm = 0.458222 Hz/pt  
 number of scans: 2700

freq. of 0 ppm: 125.736558 MHz  
 processed size: 32768 complex points  
 LB: 1.000 GF: 0.0000  
 Hz/cm: 14.259 ppm/cm: 0.11340

SpinWorks 3: TES4\_Imine\_CD3CN; AV500 13C

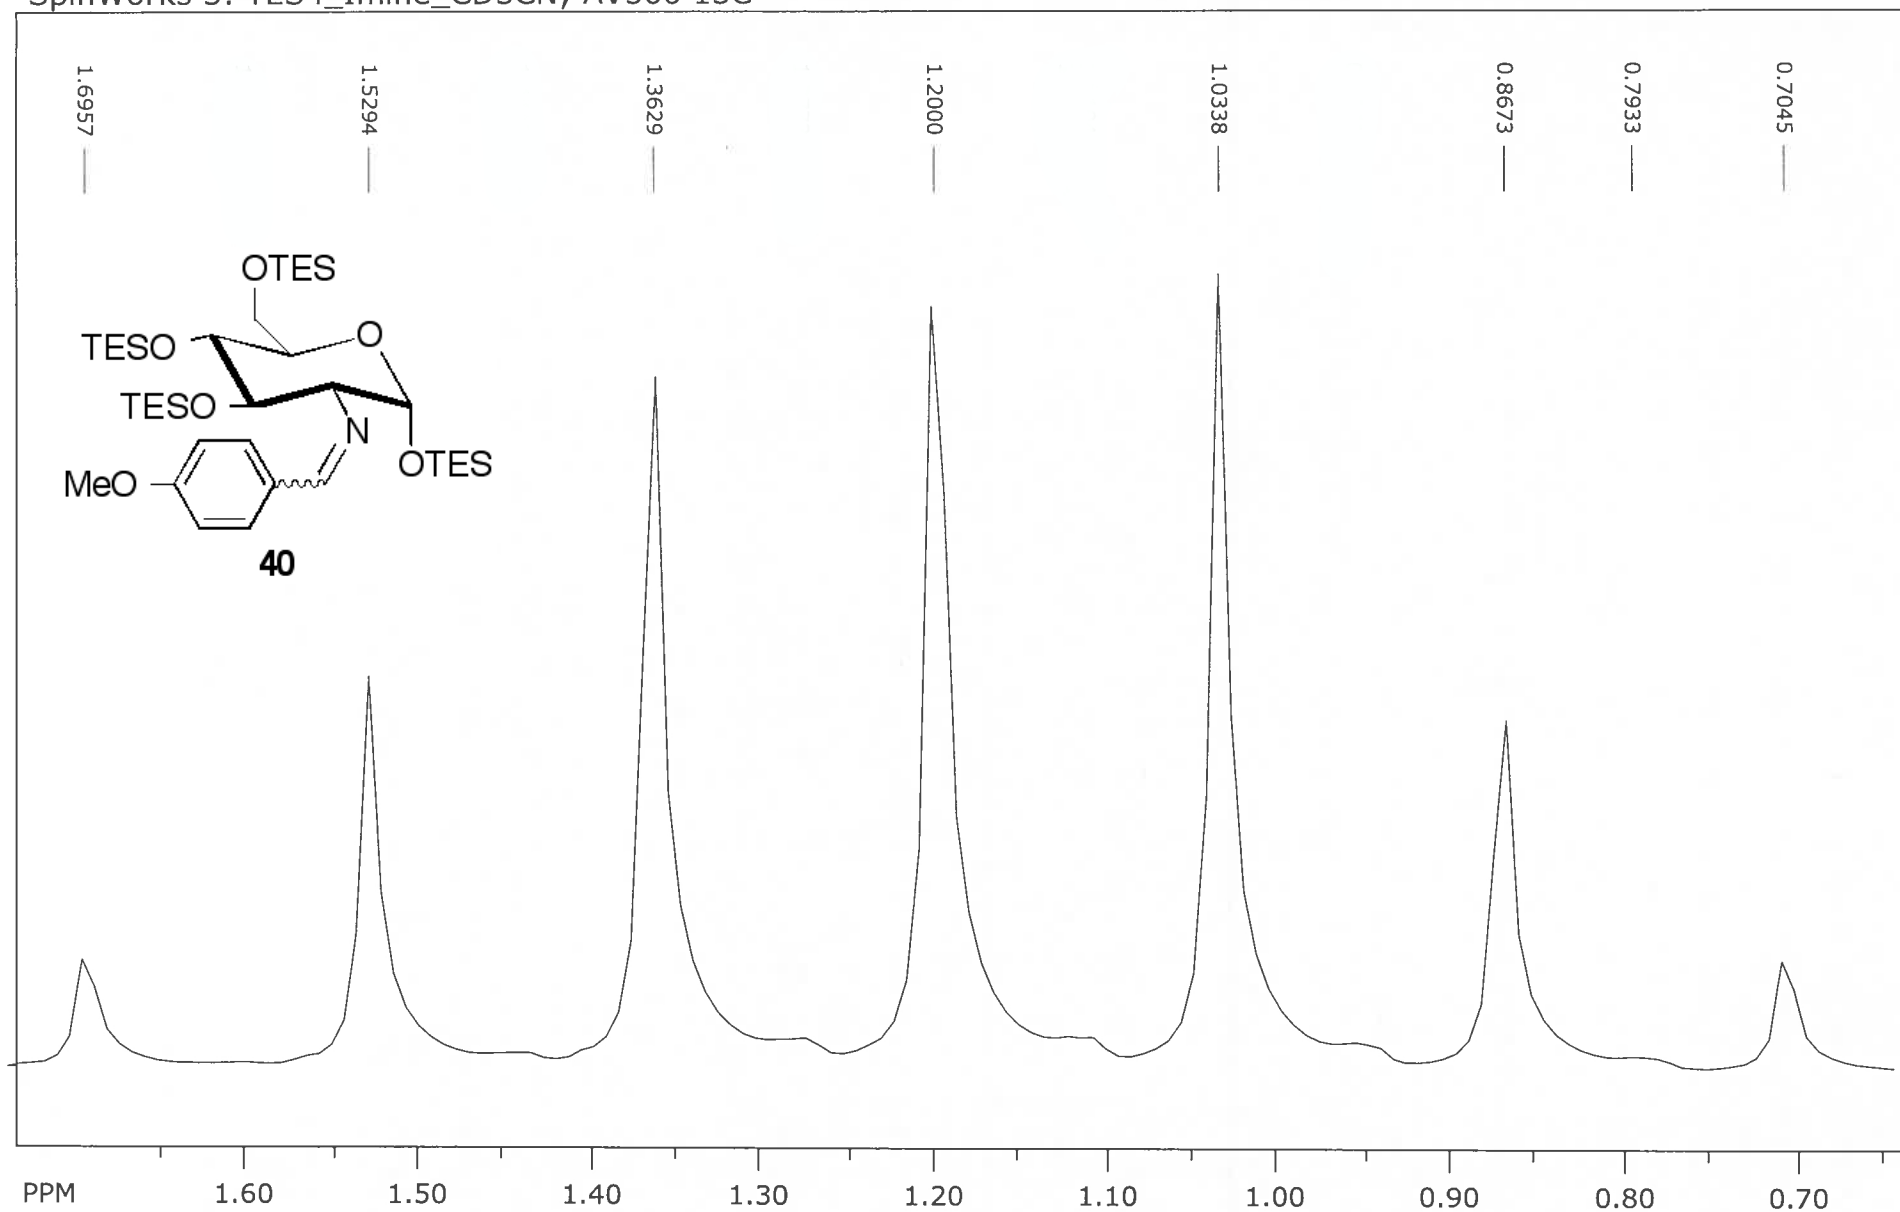

file: ...\\nrmr\Posakony\nmr\imine\_7\_09\2\fid expt: <zpgg30>  
transmitter freq.: 125.749240 MHz  
time domain size: 65536 points  
width: 30030.03 Hz = 238.8088 ppm = 0.458222 Hz/pt  
number of scans: 2700

freq. of 0 ppm: 125.736558 MHz  
processed size: 32768 complex points  
LB: 1.000 GF: 0.0000  
Hz/cm: 5.541 ppm/cm: 0.04406



|               |                      |             |                      |                 |              |                        |                      |
|---------------|----------------------|-------------|----------------------|-----------------|--------------|------------------------|----------------------|
| Sample Name   | Jeff 44              | Position    | Vial 44              | Instrument Name | Instrument 1 | User Name              | DYL                  |
| Inj Vol       | 1                    | InjPosition |                      | SampleType      | Unknown      | IRM Calibration Status | Success              |
| Data Filename | Direct_Vial 44_Jeff. | ACQ Method  | Direct_small mol_Jef | Comment         |              | Acquired Time          | 8/17/2012 2:01:09 PM |

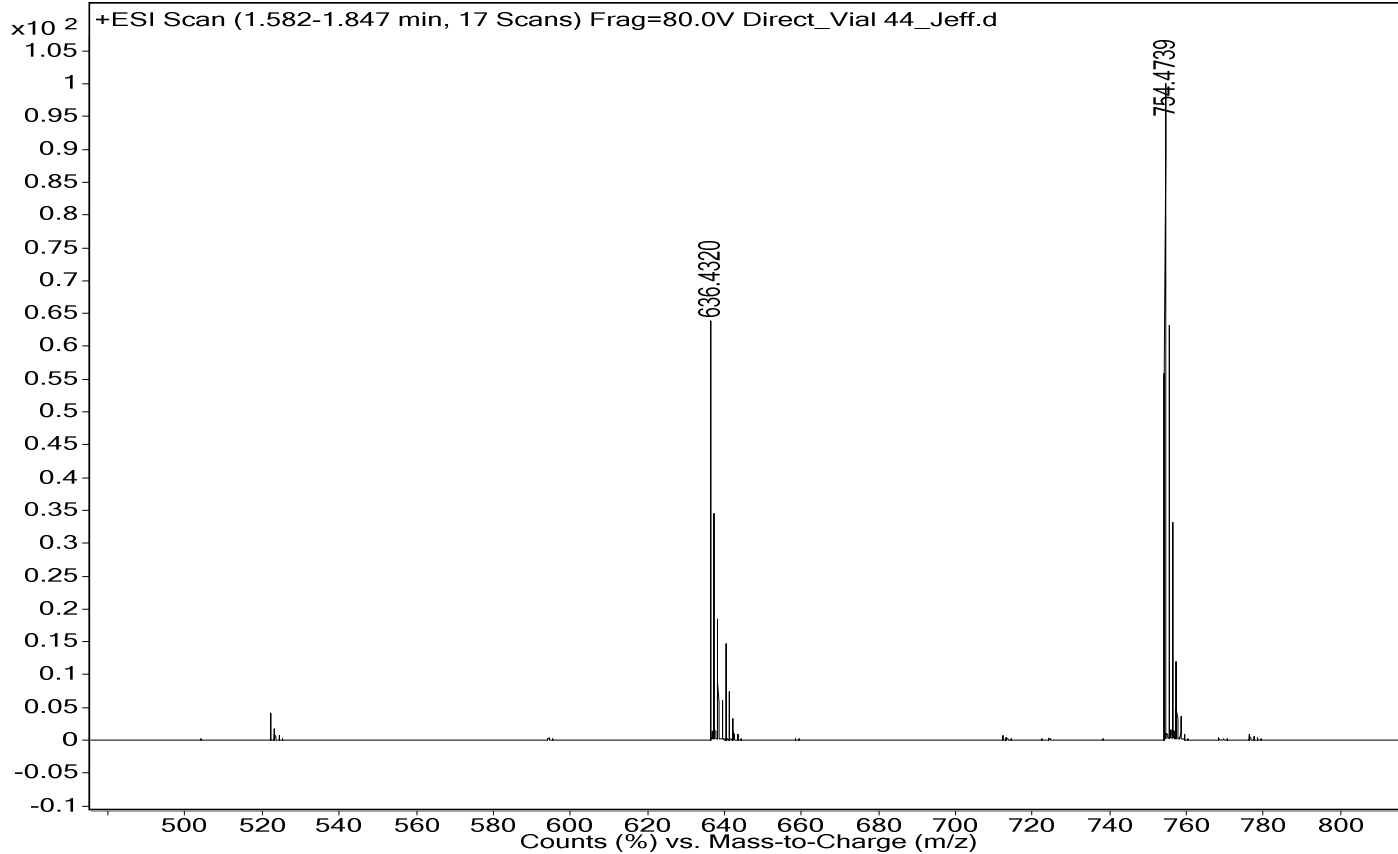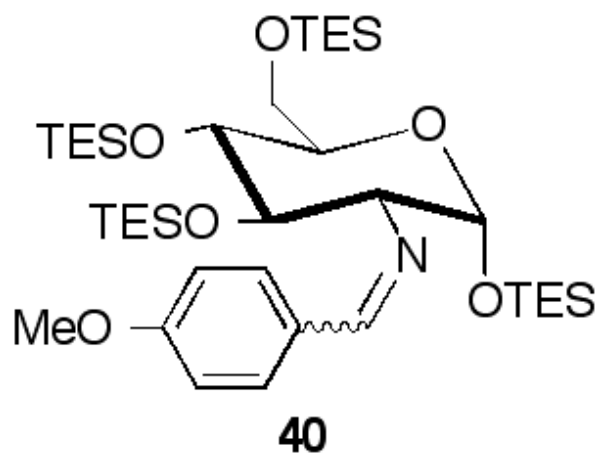

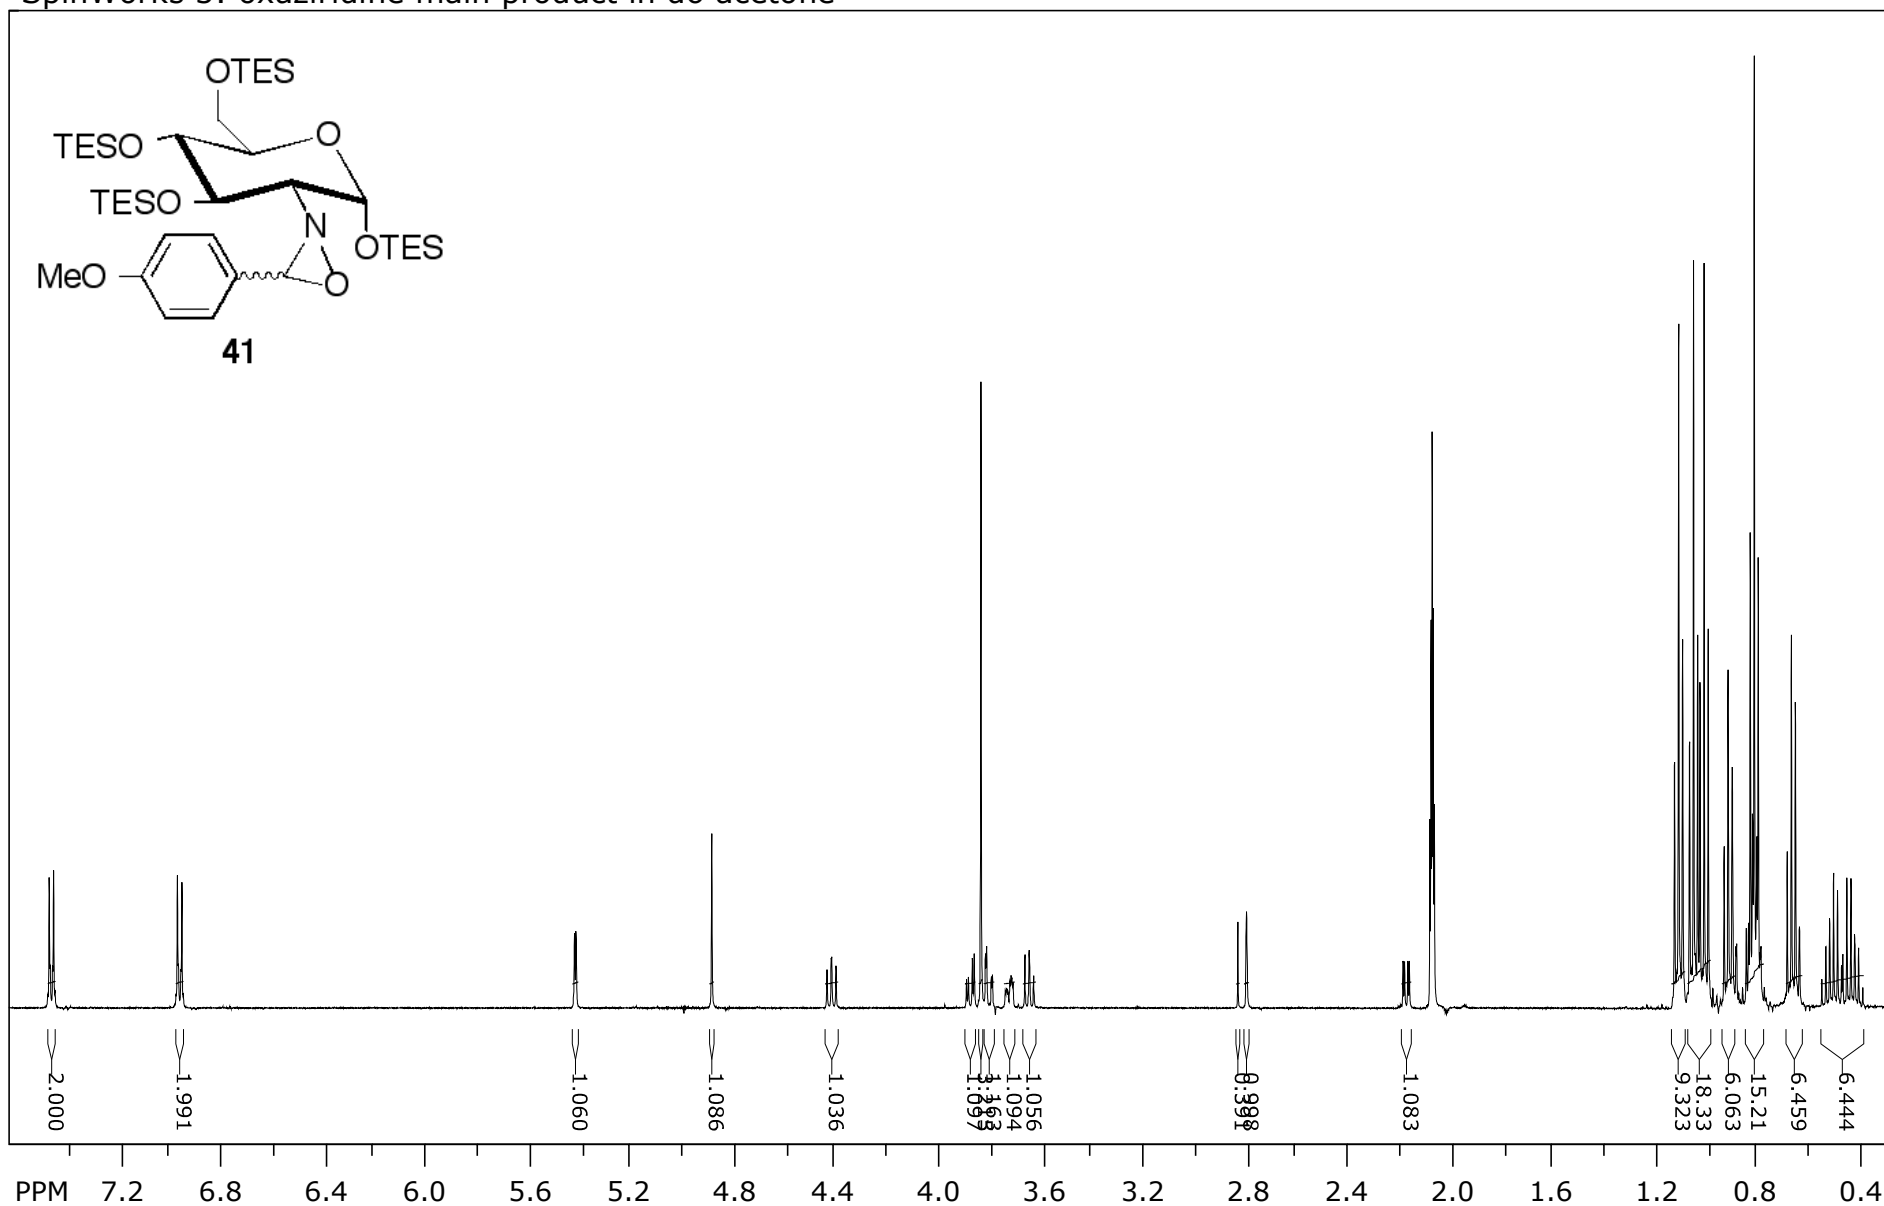

file: ...ir main in acetone-d6 dilute\1\fid expt: <zg>  
transmitter freq.: 499.852499 MHz  
time domain size: 32768 points  
width: 5000.00 Hz = 10.0030 ppm = 0.152588 Hz/pt  
number of scans: 128

freq. of 0 ppm: 499.850000 MHz  
processed size: 16384 complex points  
LB: 0.300 GF: 0.0000  
Hz/cm: 147.496 ppm/cm: 0.29508

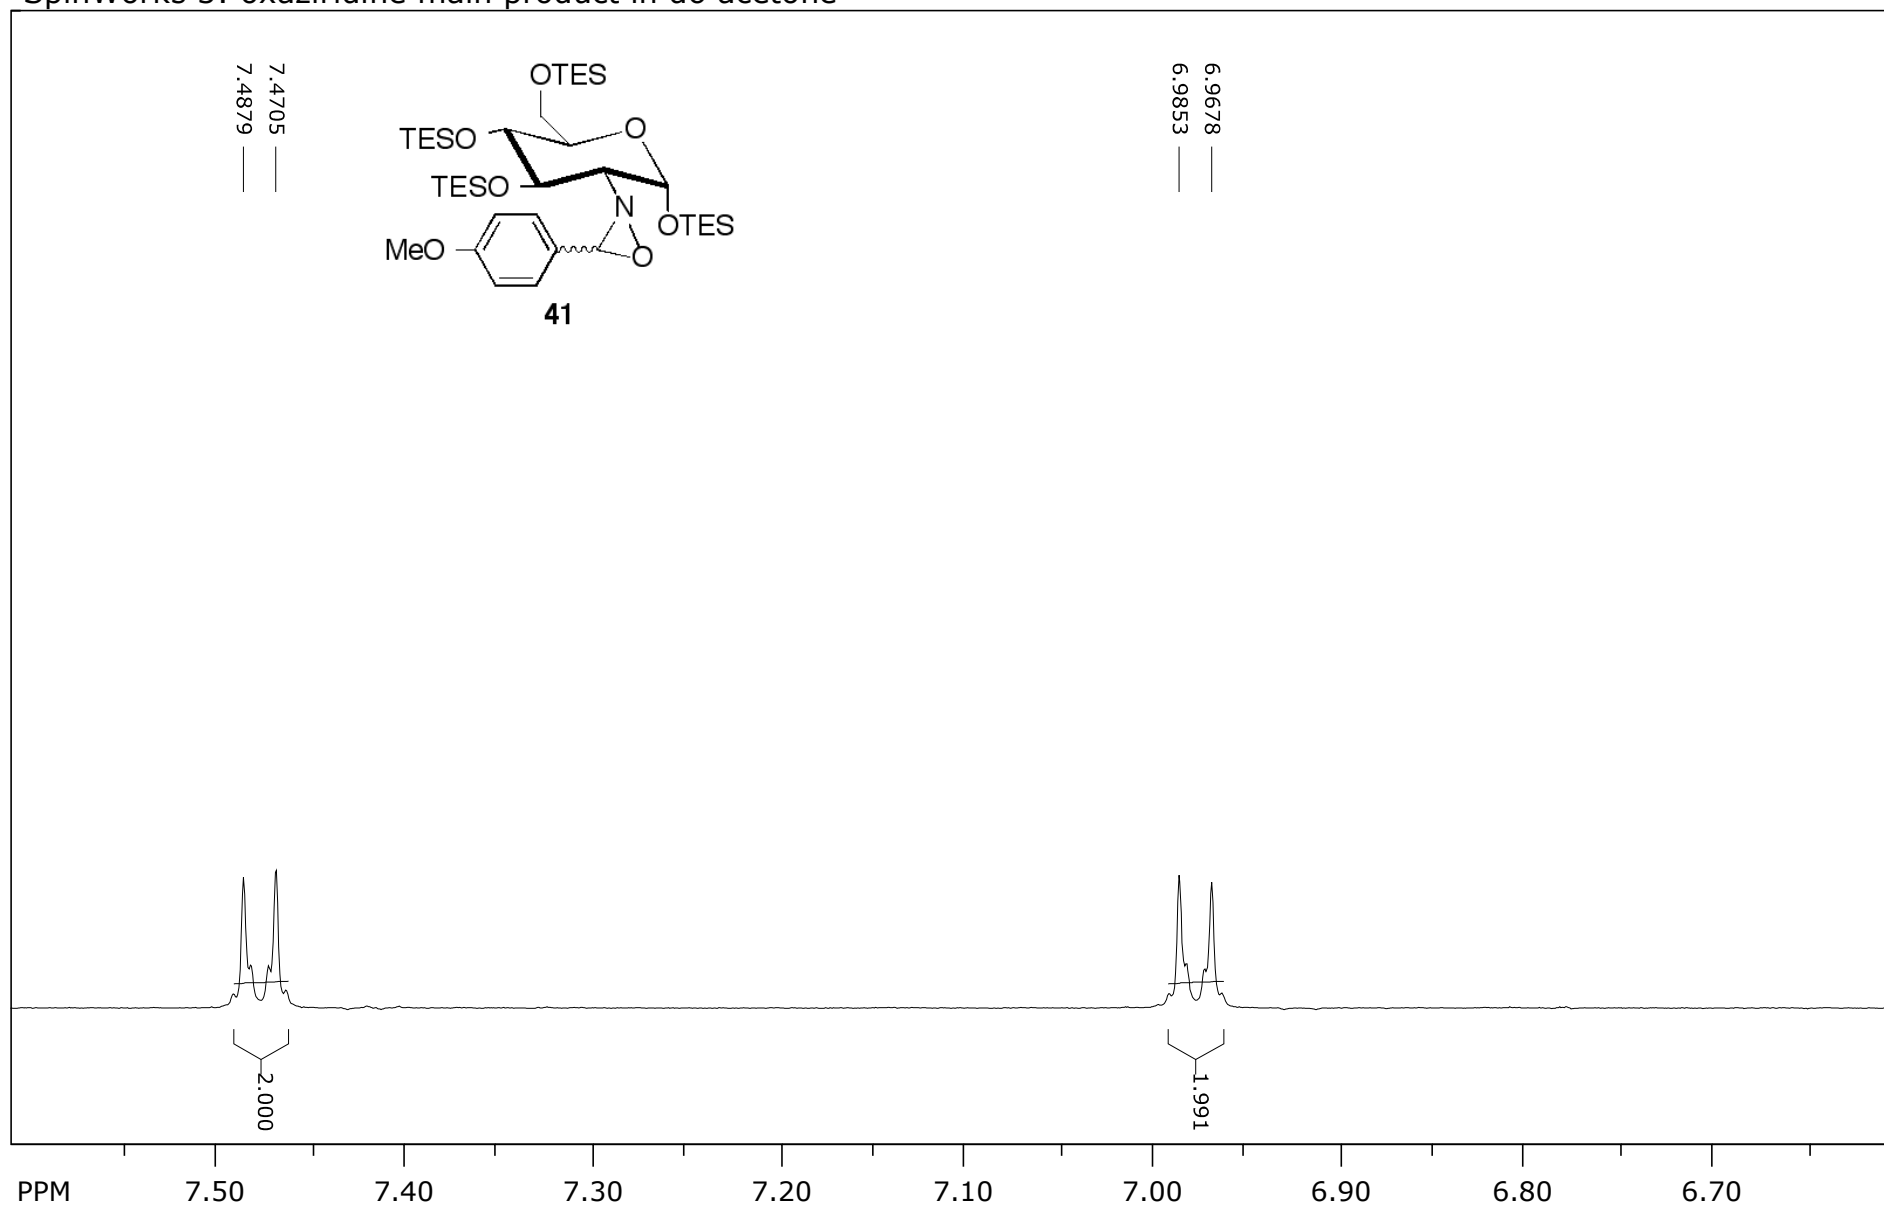

file: ...ir main in acetone-d6 dilute\1\fid expt: <zg>  
transmitter freq.: 499.852499 MHz  
time domain size: 32768 points  
width: 5000.00 Hz = 10.0030 ppm = 0.152588 Hz/pt  
number of scans: 128

freq. of 0 ppm: 499.850000 MHz  
processed size: 16384 complex points  
LB: 0.300 GF: 0.0000  
Hz/cm: 20.213 ppm/cm: 0.04044

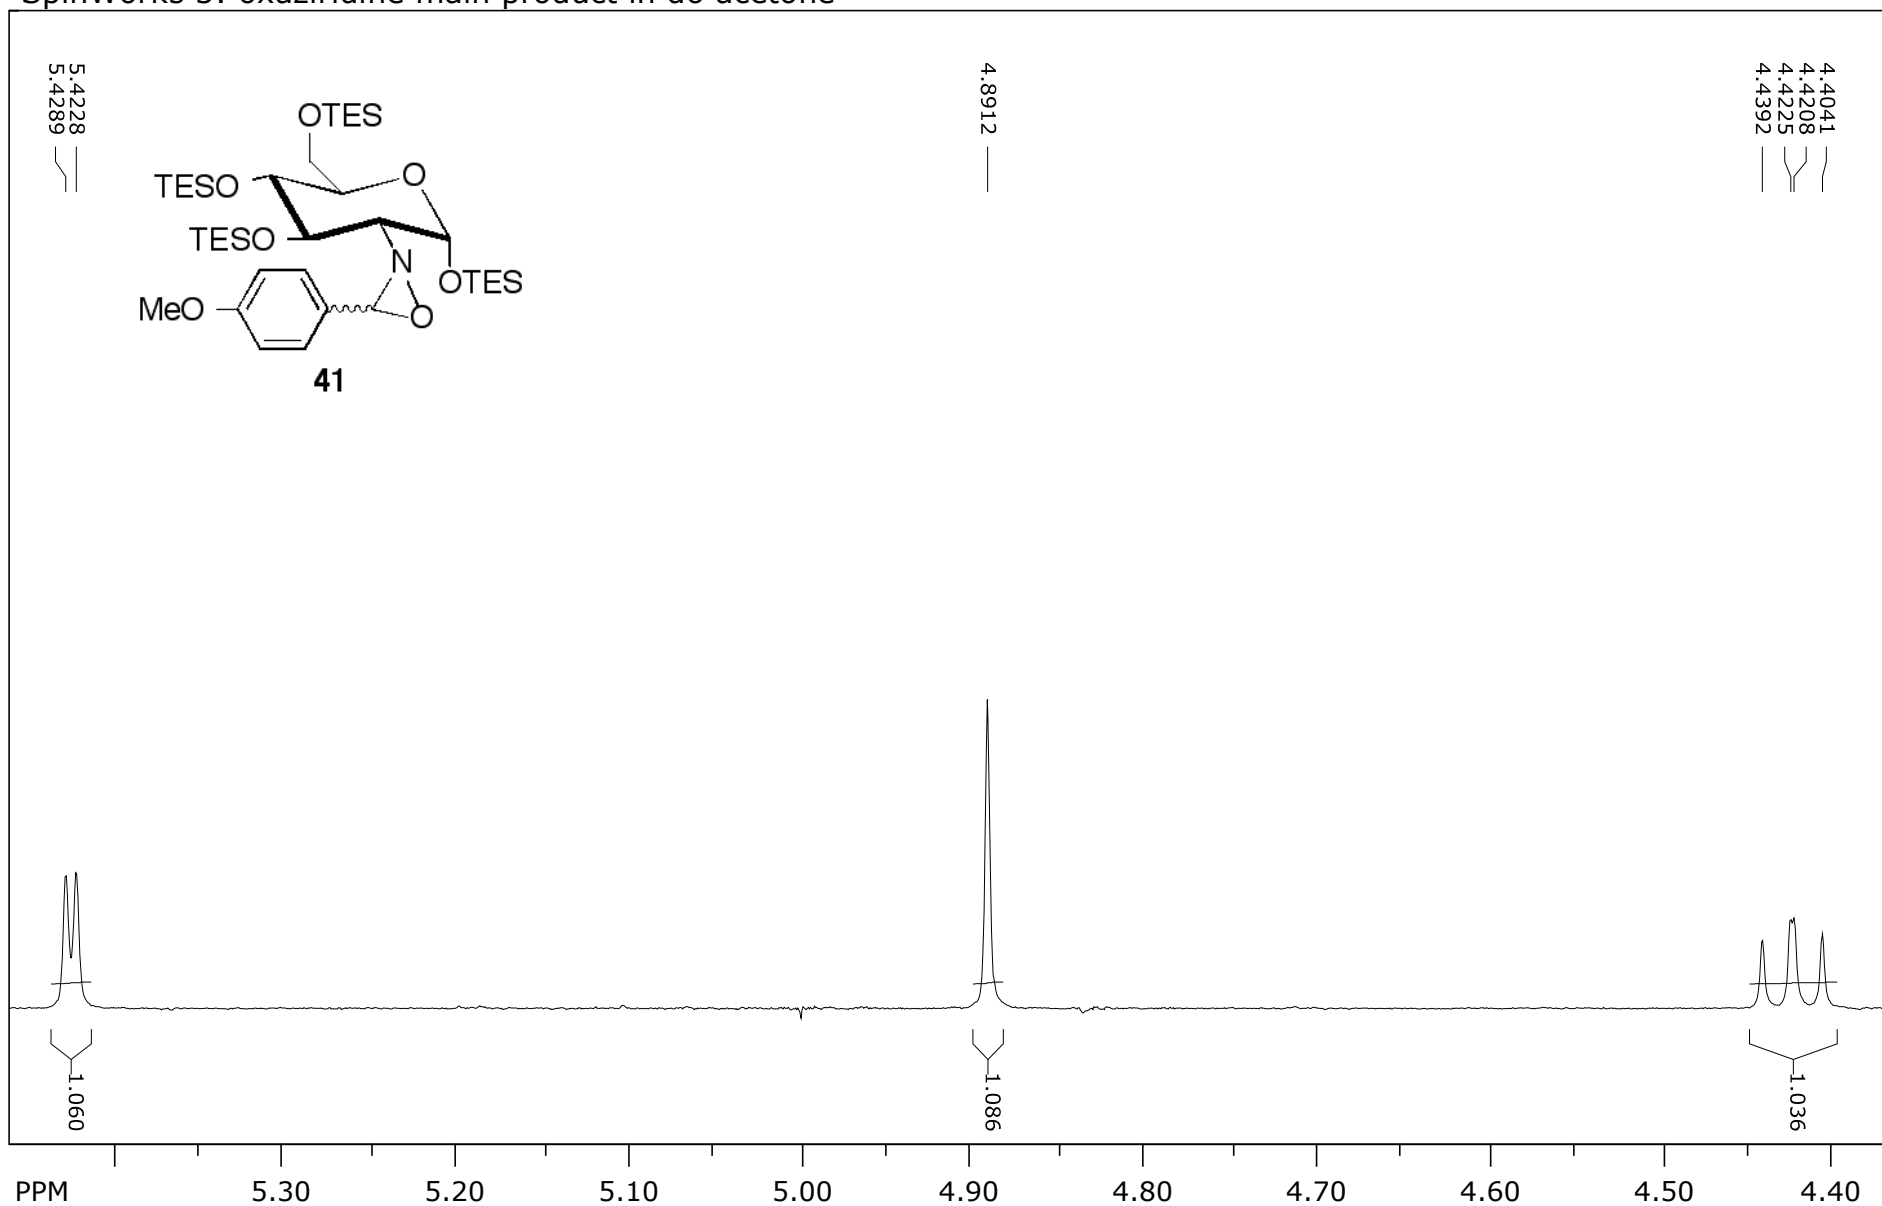

file: ...ir main in acetone-d6 dilute\1\fid expt: <zg>  
transmitter freq.: 499.852499 MHz  
time domain size: 32768 points  
width: 5000.00 Hz = 10.0030 ppm = 0.152588 Hz/pt  
number of scans: 128

freq. of 0 ppm: 499.850000 MHz  
processed size: 16384 complex points  
LB: 0.300 GF: 0.0000  
Hz/cm: 21.954 ppm/cm: 0.04392

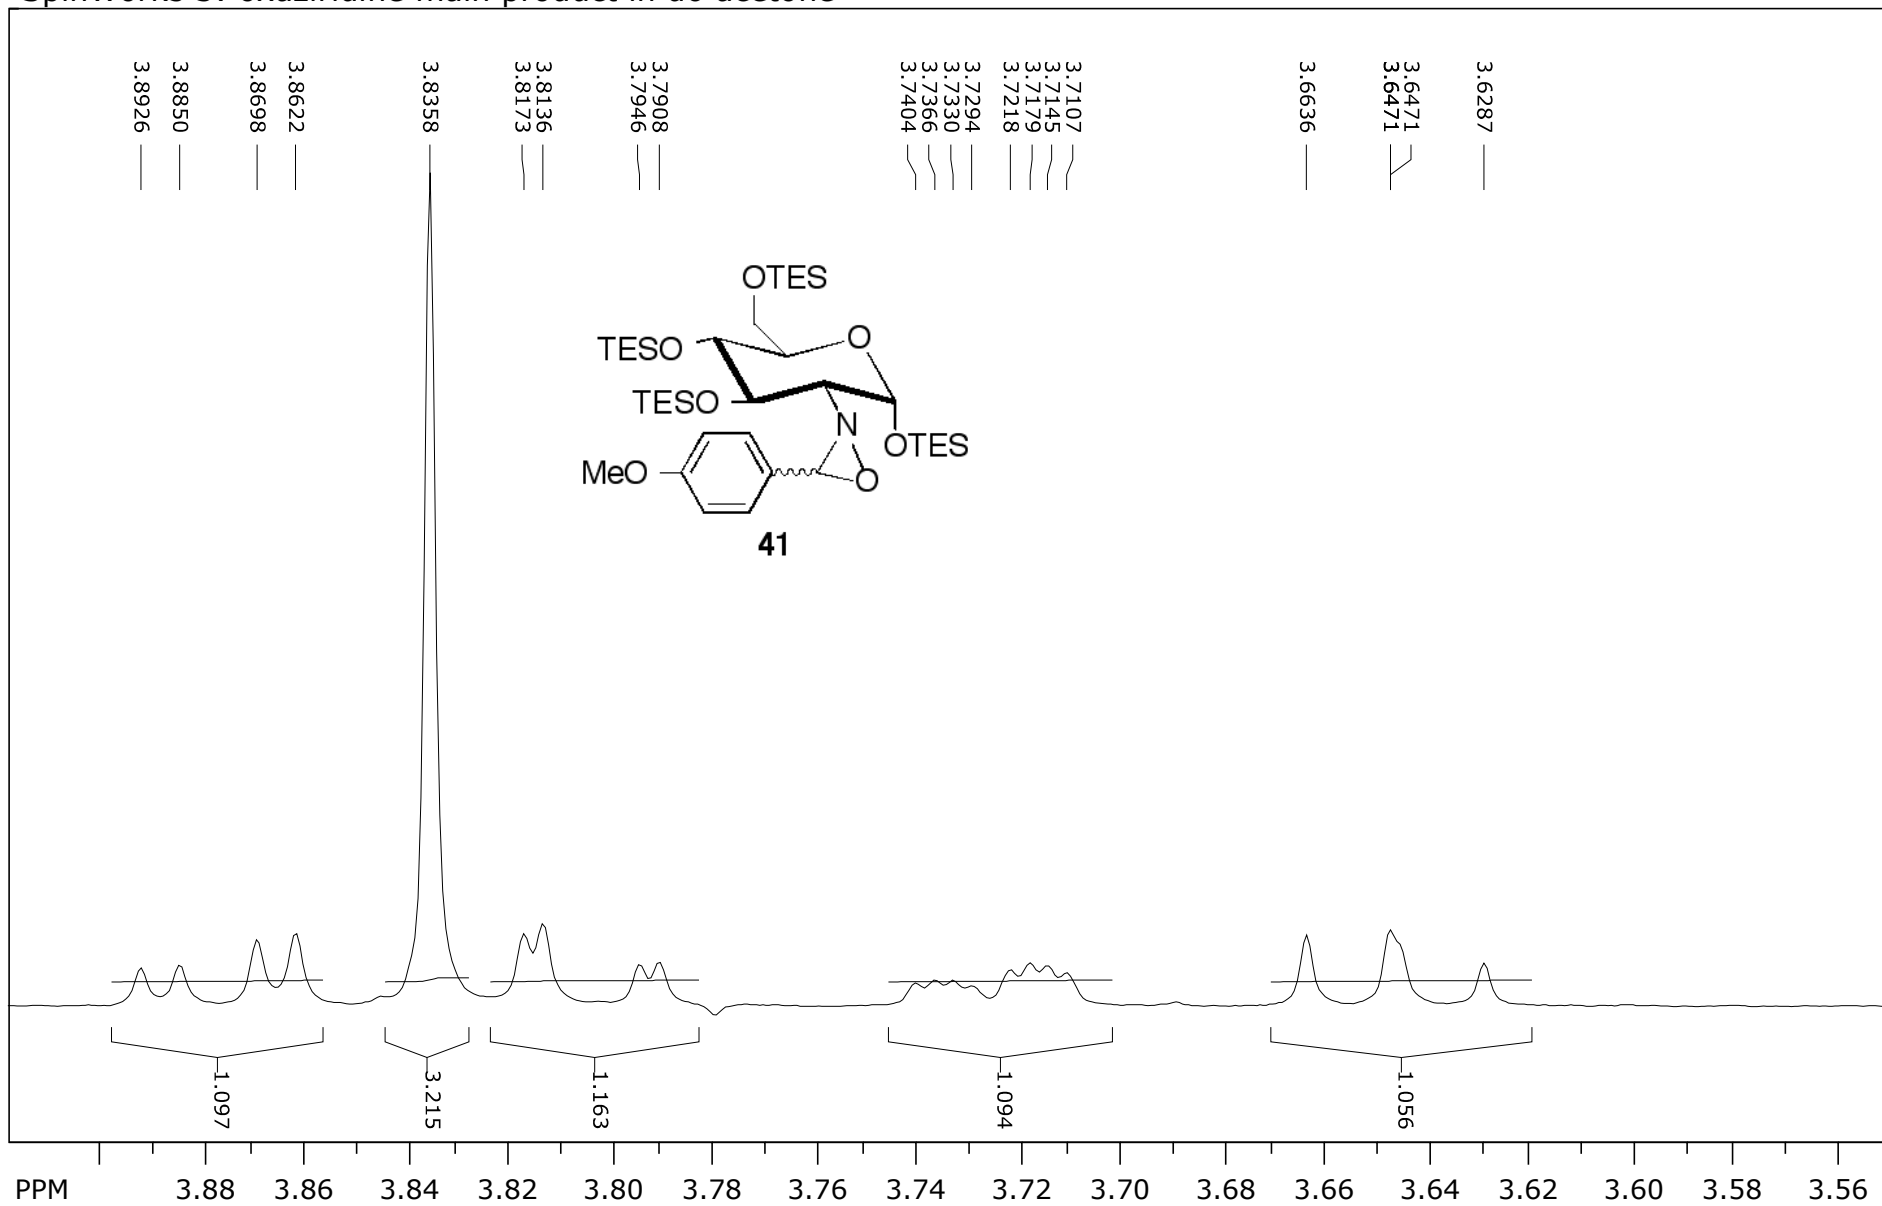

file: ...ir main in acetone-d6 dilute\1\fid expt: <zg>  
transmitter freq.: 499.852499 MHz  
time domain size: 32768 points  
width: 5000.00 Hz = 10.0030 ppm = 0.152588 Hz/pt  
number of scans: 128

freq. of 0 ppm: 499.850000 MHz  
processed size: 16384 complex points  
LB: 0.300 GF: 0.0000  
Hz/cm: 7.393 ppm/cm: 0.01479

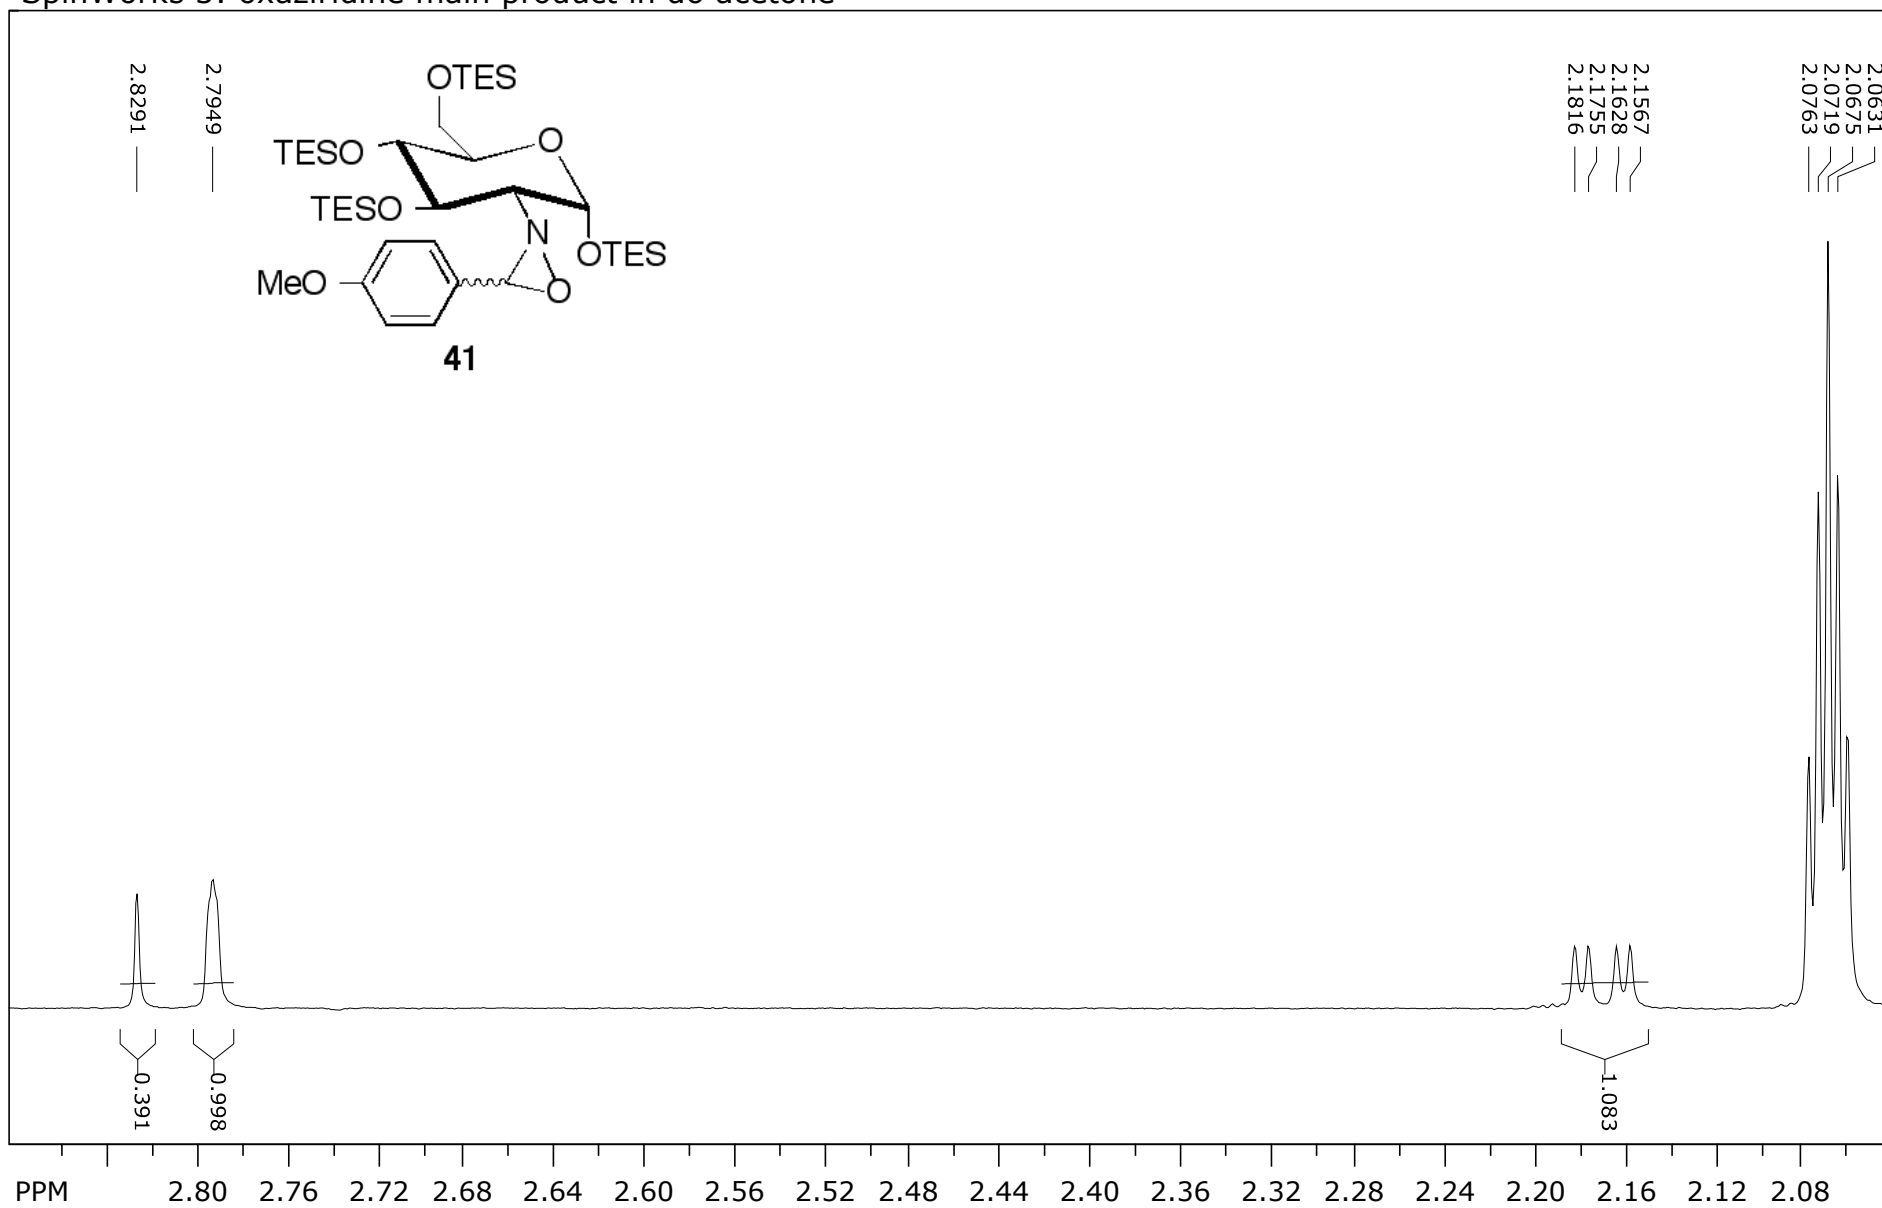

file: ...ir main in acetone-d6 dilute\1\fid expt: <zg>  
transmitter freq.: 499.852499 MHz  
time domain size: 32768 points  
width: 5000.00 Hz = 10.0030 ppm = 0.152588 Hz/pt  
number of scans: 128

freq. of 0 ppm: 499.850000 MHz  
processed size: 16384 complex points  
LB: 0.300 GF: 0.0000  
Hz/cm: 16.945 ppm/cm: 0.03390

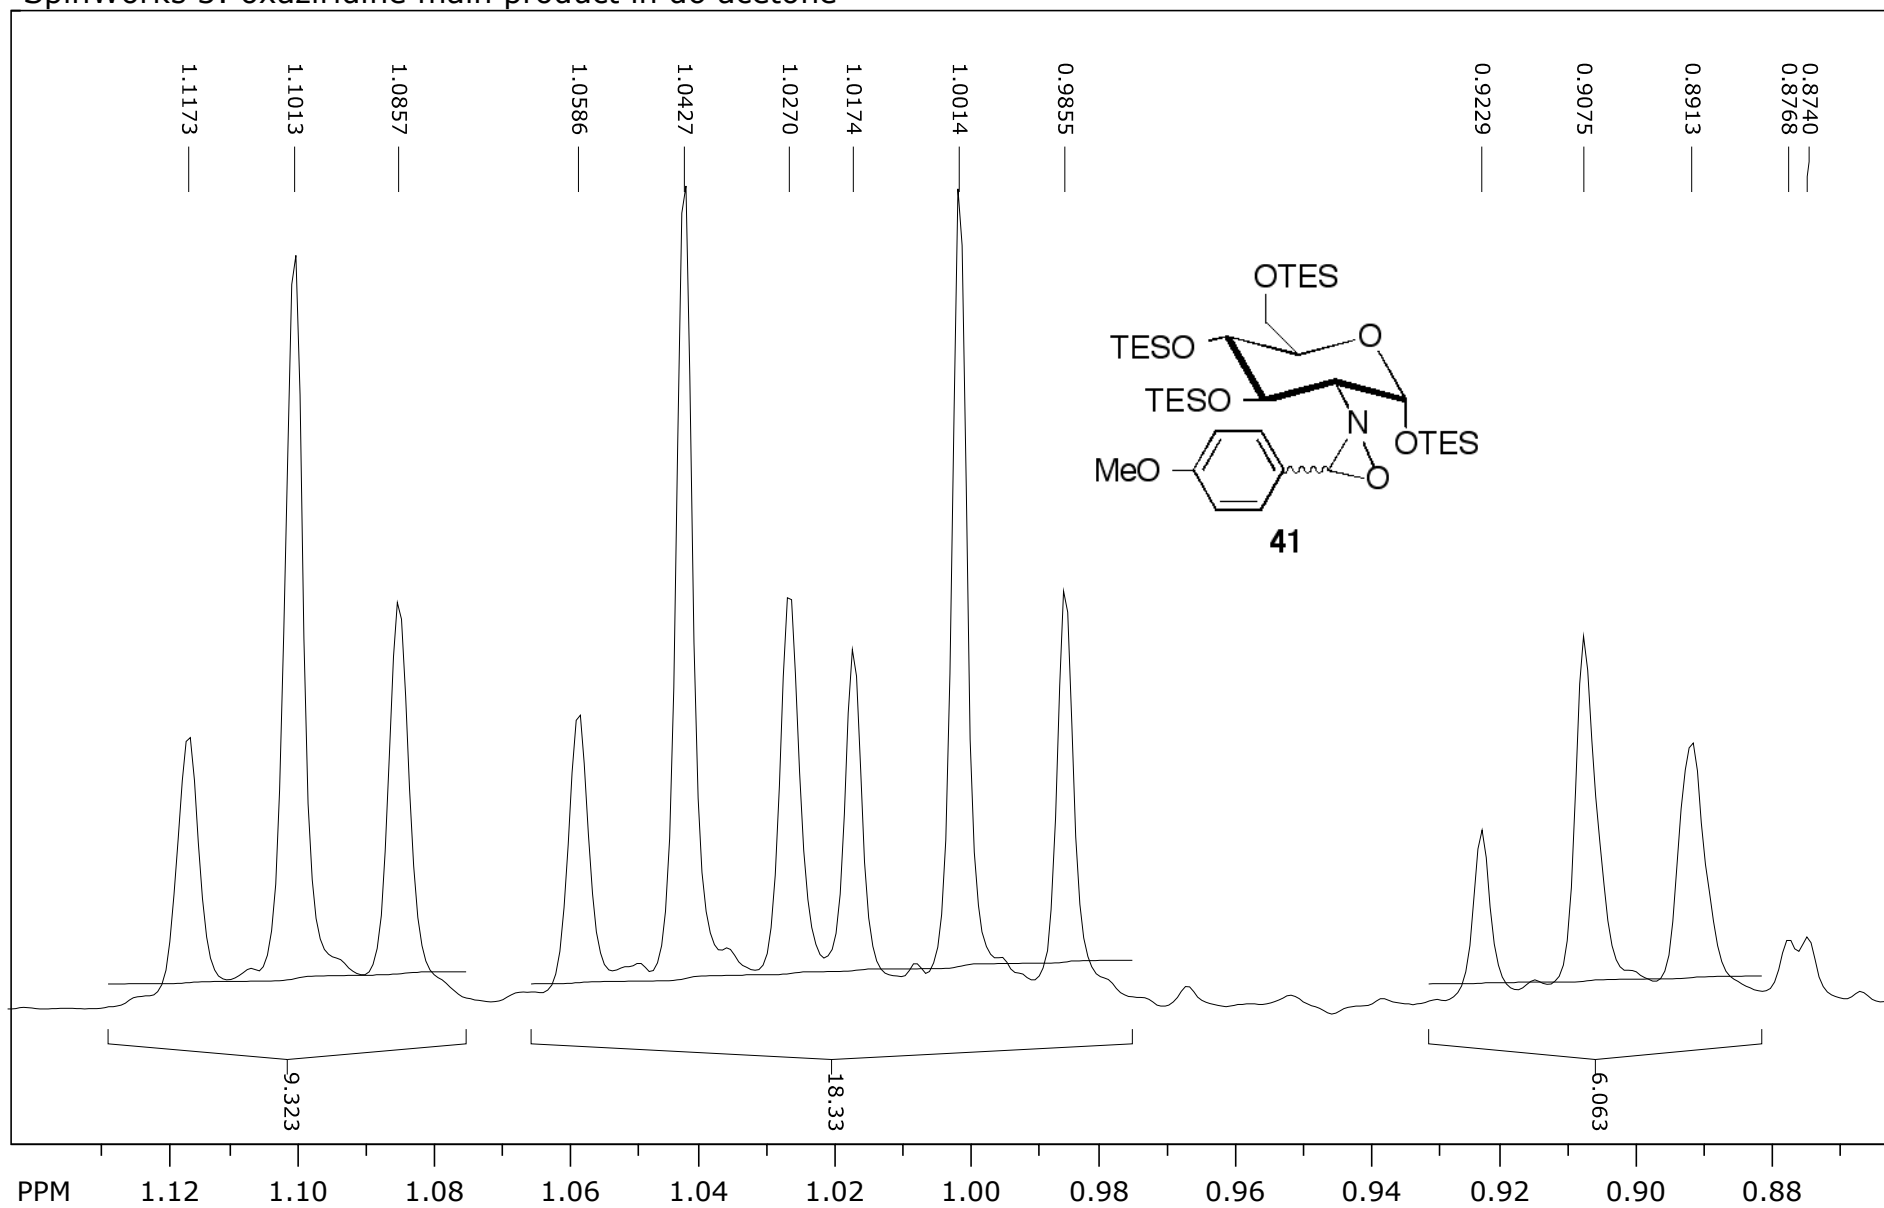

file: ...ir main in acetone-d6 dilute\1\fid expt: <zg>  
transmitter freq.: 499.852499 MHz  
time domain size: 32768 points  
width: 5000.00 Hz = 10.0030 ppm = 0.152588 Hz/pt  
number of scans: 128

freq. of 0 ppm: 499.850000 MHz  
processed size: 16384 complex points  
LB: 0.300 GF: 0.0000  
Hz/cm: 5.656 ppm/cm: 0.01132

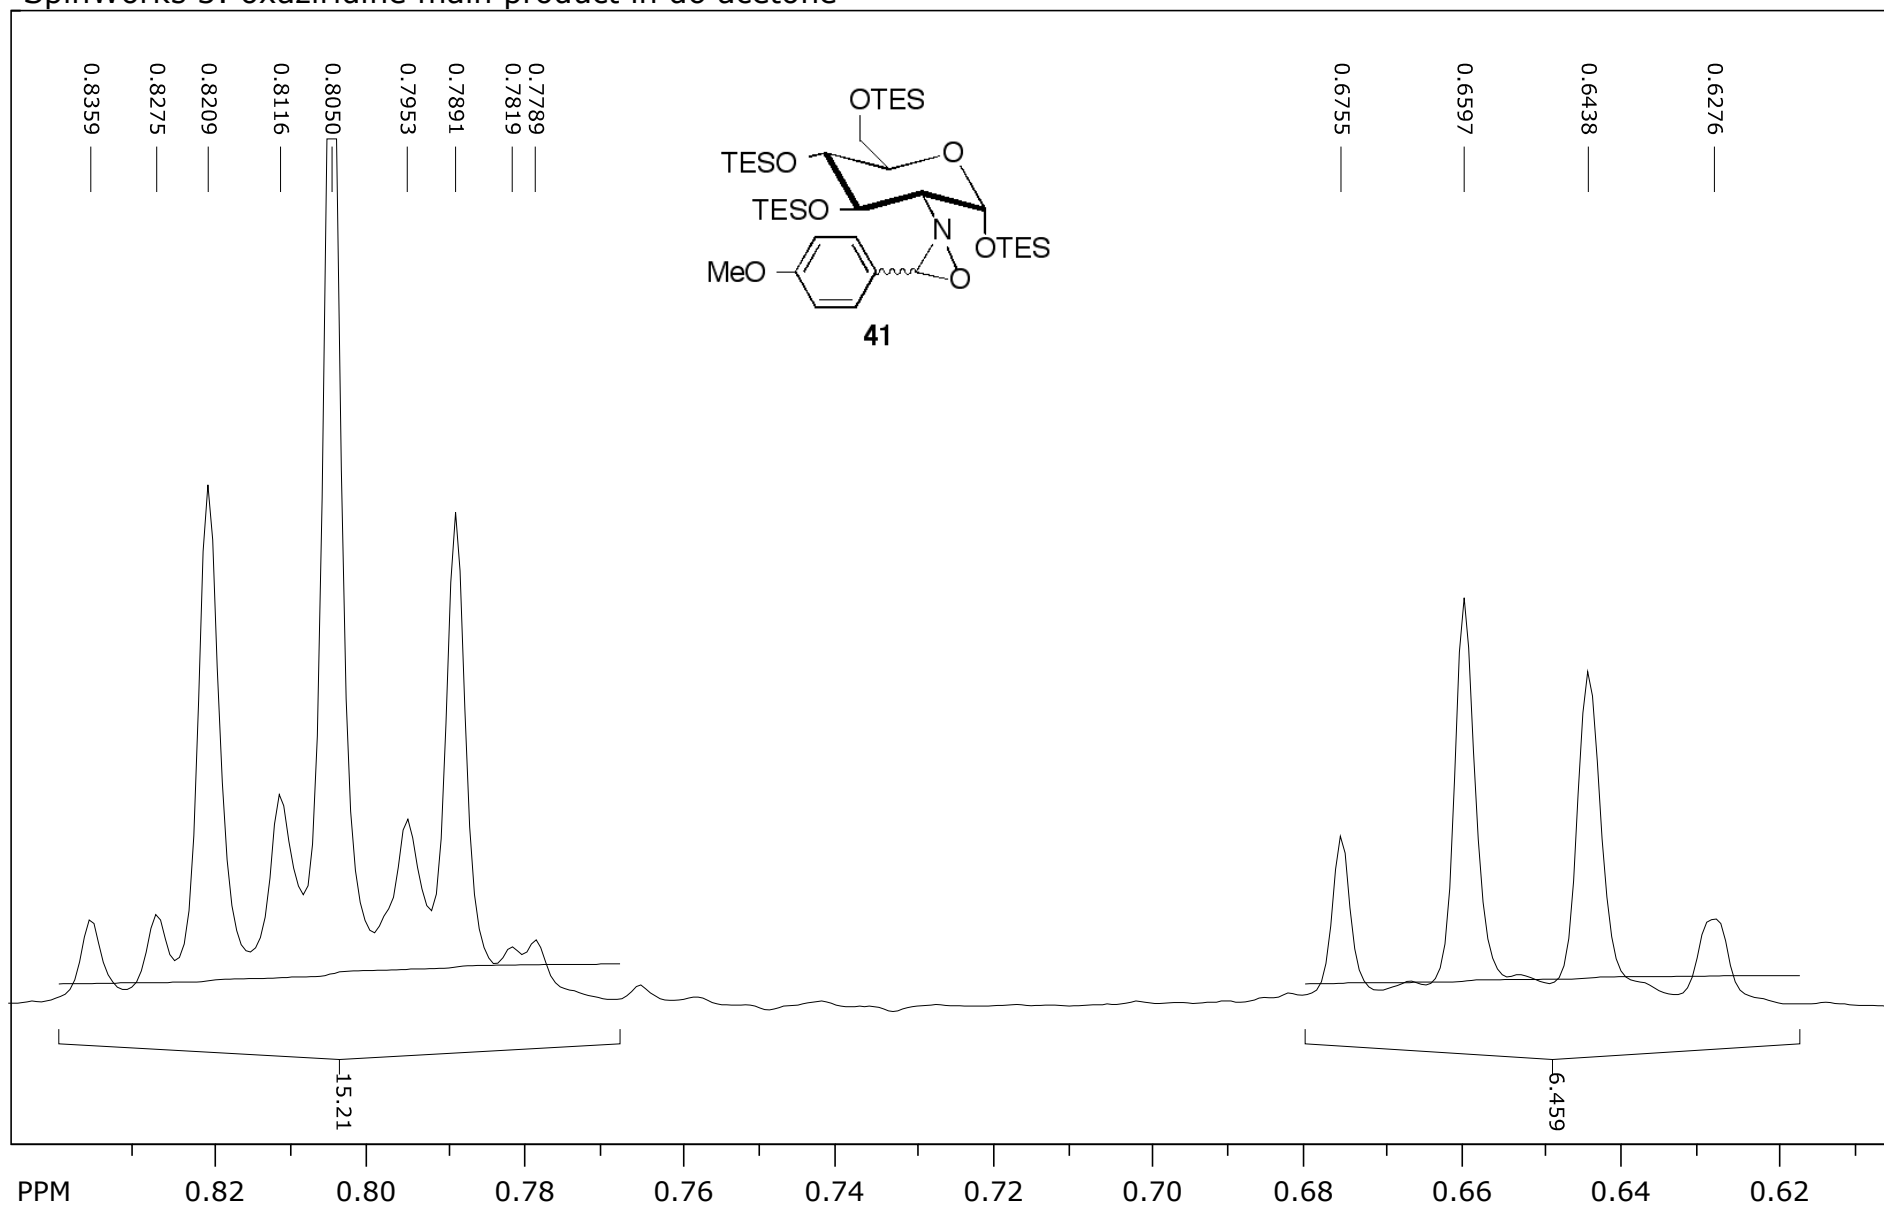

file: ...ir main in acetone-d6 dilute\1\fid expt: <zg>  
transmitter freq.: 499.852499 MHz  
time domain size: 32768 points  
width: 5000.00 Hz = 10.0030 ppm = 0.152588 Hz/pt  
number of scans: 128

freq. of 0 ppm: 499.850000 MHz  
processed size: 16384 complex points  
LB: 0.300 GF: 0.0000  
Hz/cm: 4.829 ppm/cm: 0.00966



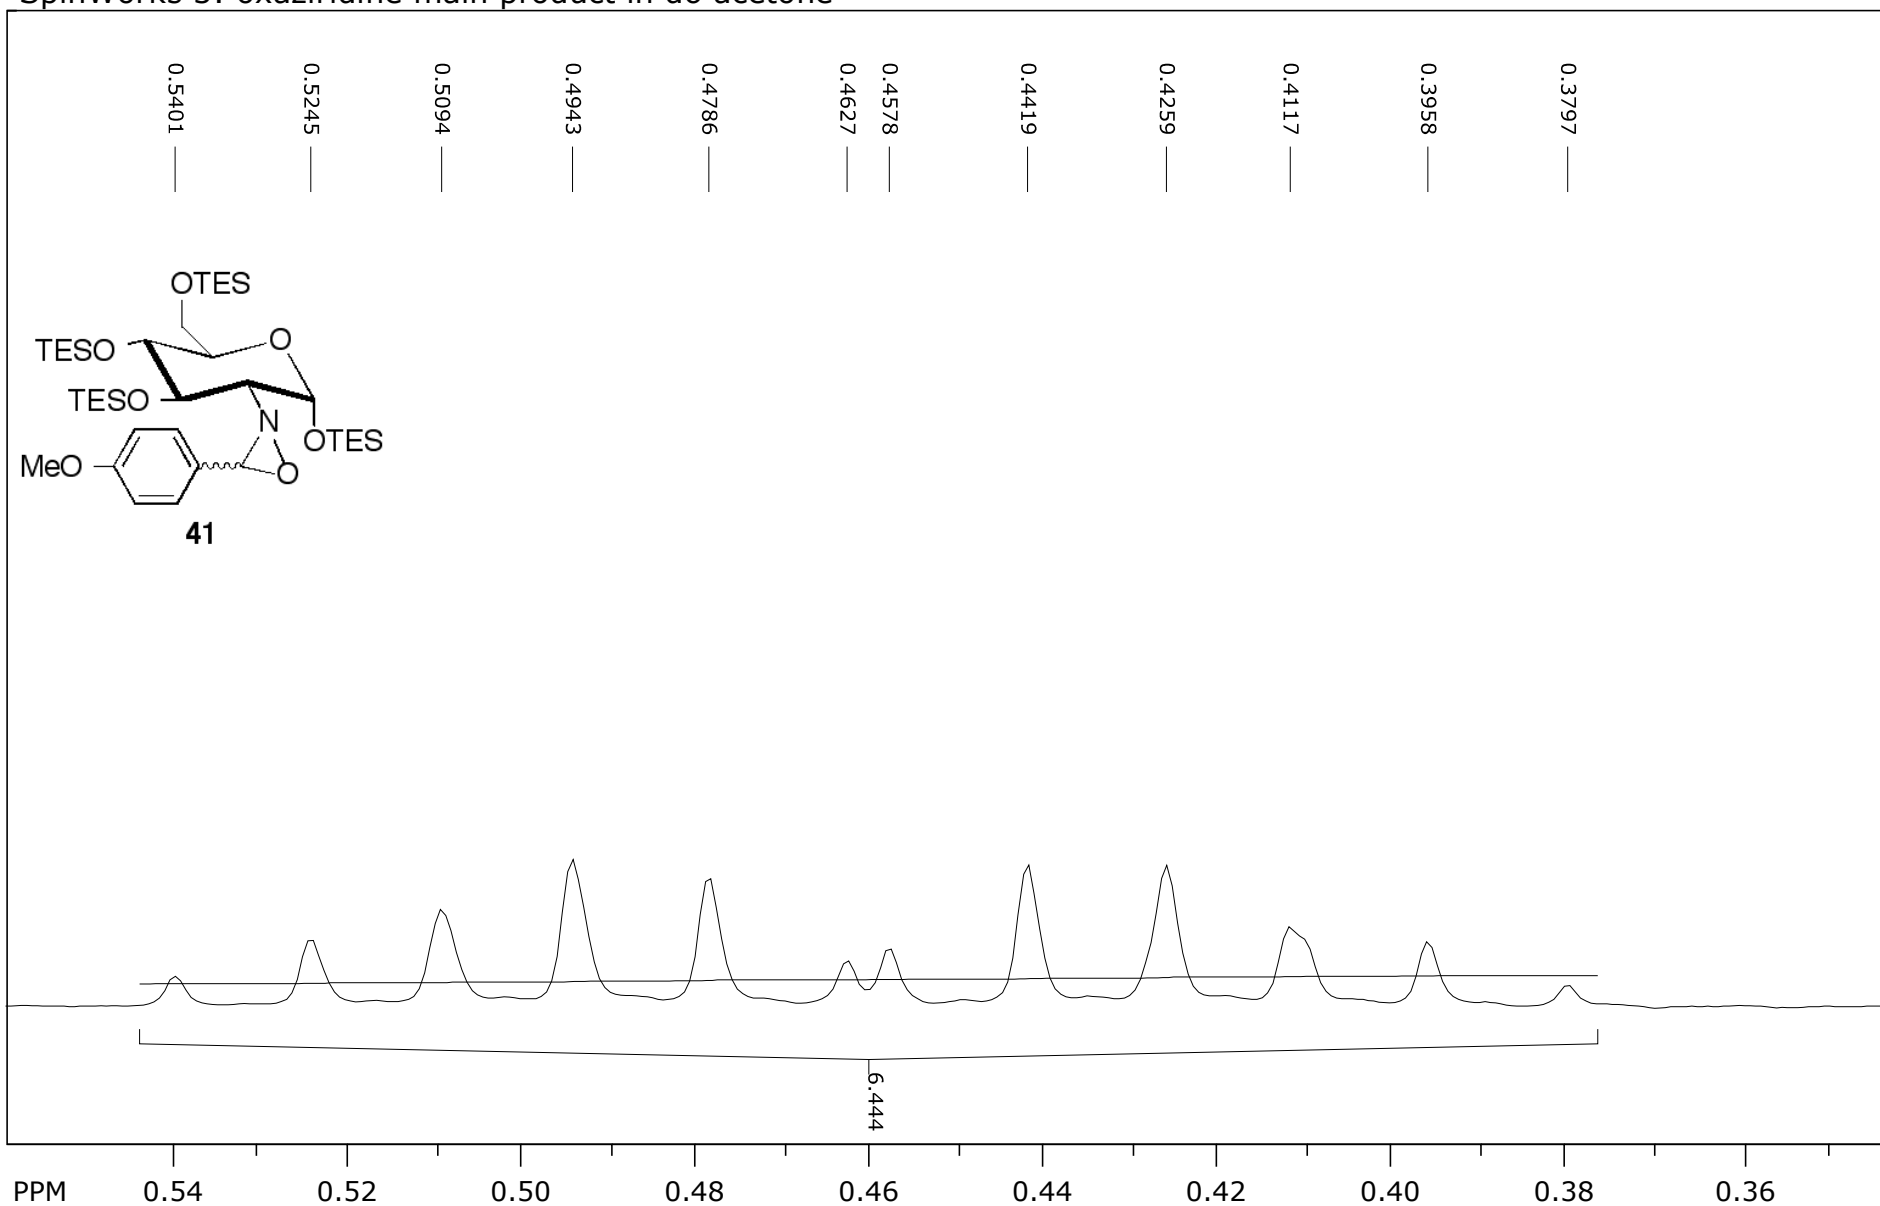

file: ...ir main in acetone-d6 dilute\1\fid expt: <zg>  
transmitter freq.: 499.852499 MHz  
time domain size: 32768 points  
width: 5000.00 Hz = 10.0030 ppm = 0.152588 Hz/pt  
number of scans: 128

freq. of 0 ppm: 499.850000 MHz  
processed size: 16384 complex points  
LB: 0.300 GF: 0.0000  
Hz/cm: 4.333 ppm/cm: 0.00867

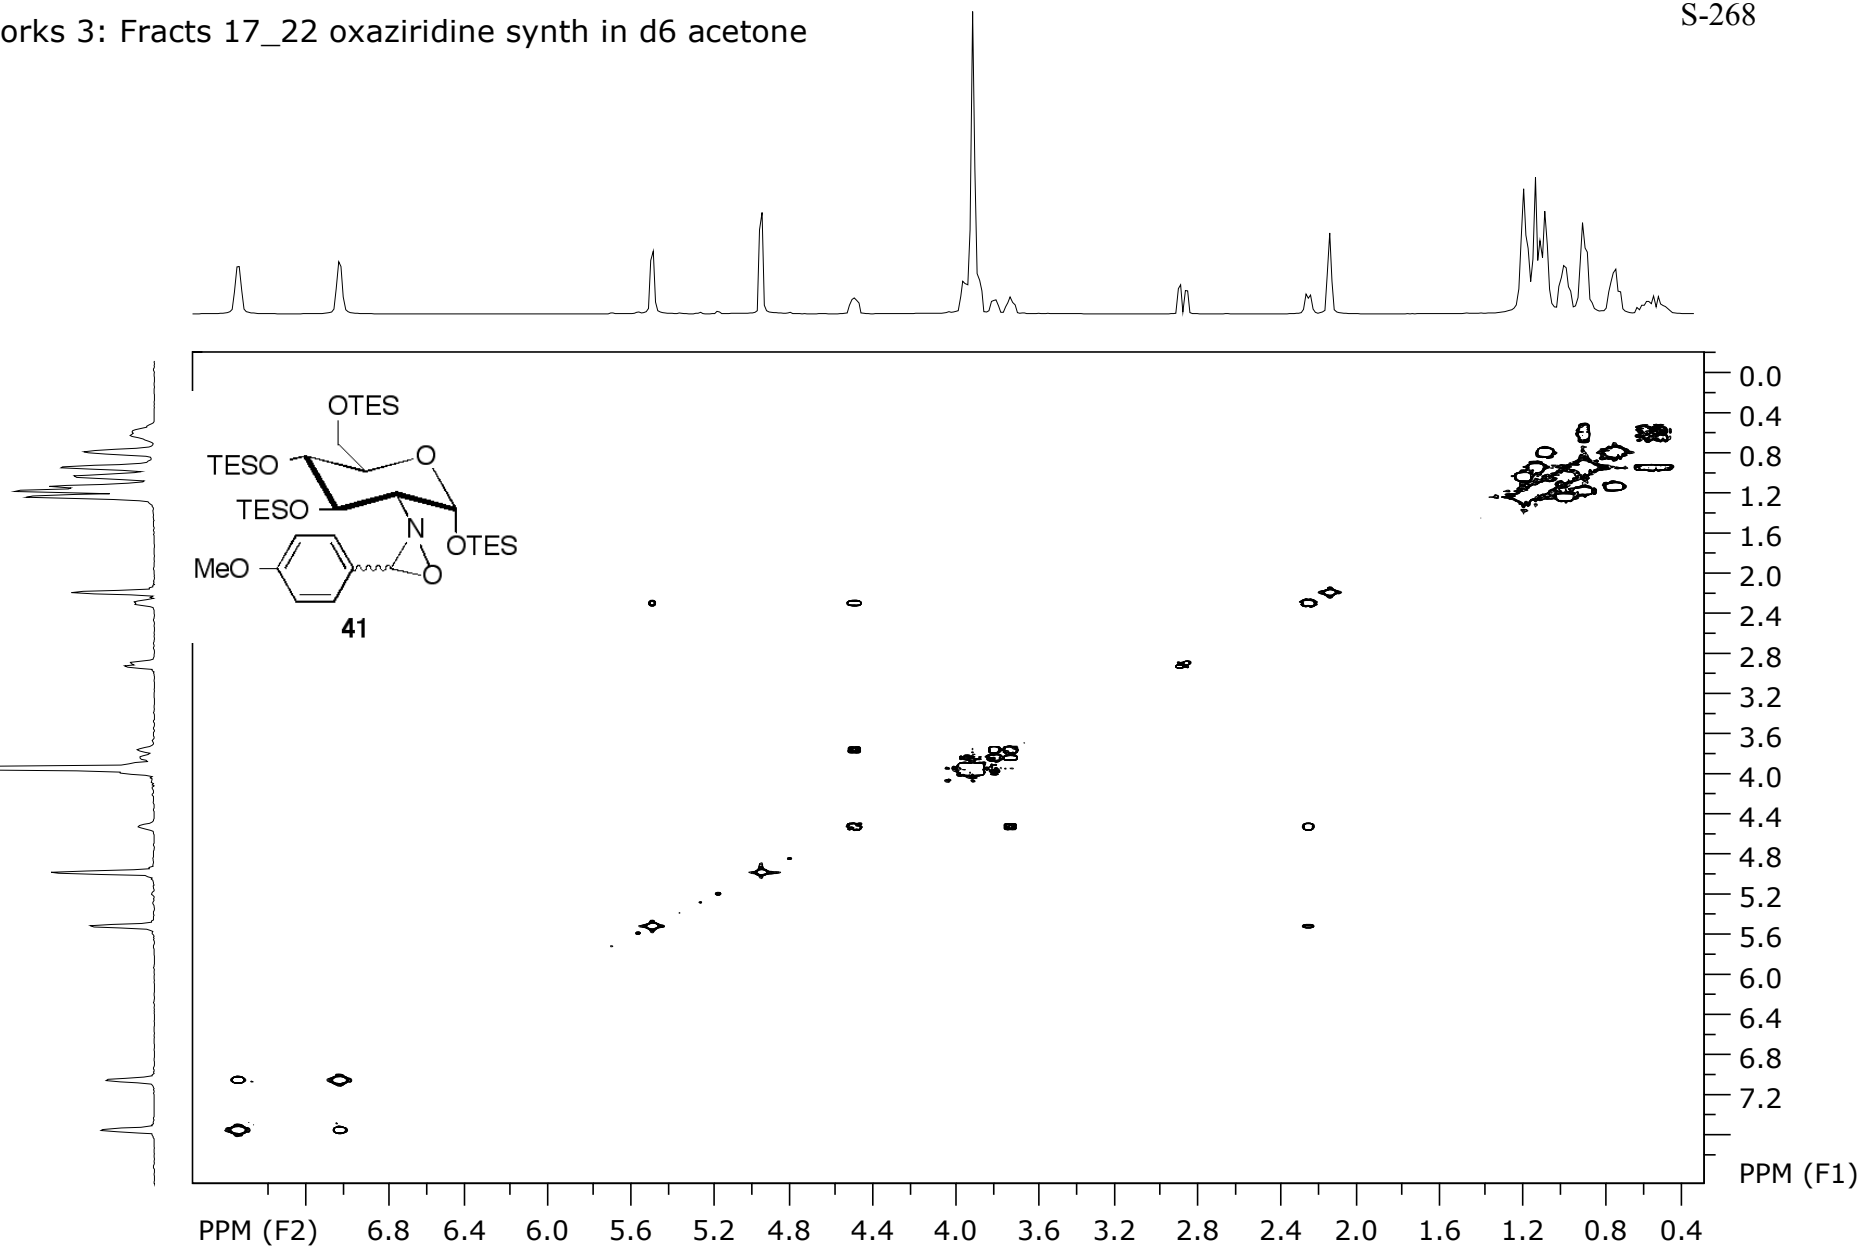

file: ...r\NMR Data\nmr6\_10\cosy17\_22\1\ser  
expt: <cosygpqf>  
transmitter freq: 600.552832 MHz  
time domain size: 2048 by 512 points  
width (F2): 7211.54 Hz = 12.0082 ppm = 3.5213 Hz/pt  
number of scans: 1

F2: freq. of 0 ppm: 600.5499623 MHz  
processed size: 1024 complex points  
window function: Sine  
shift: 0.0 degrees  
Hz/cm: 223.955 ppm/cm: 0.37291

F1: freq. of 0 ppm: 600.5499623 MHz  
processed size: 1024 complex points  
window function: Sine  
shift: 0.0 degrees  
Hz/cm: 452.666 ppm/cm: 0.75375

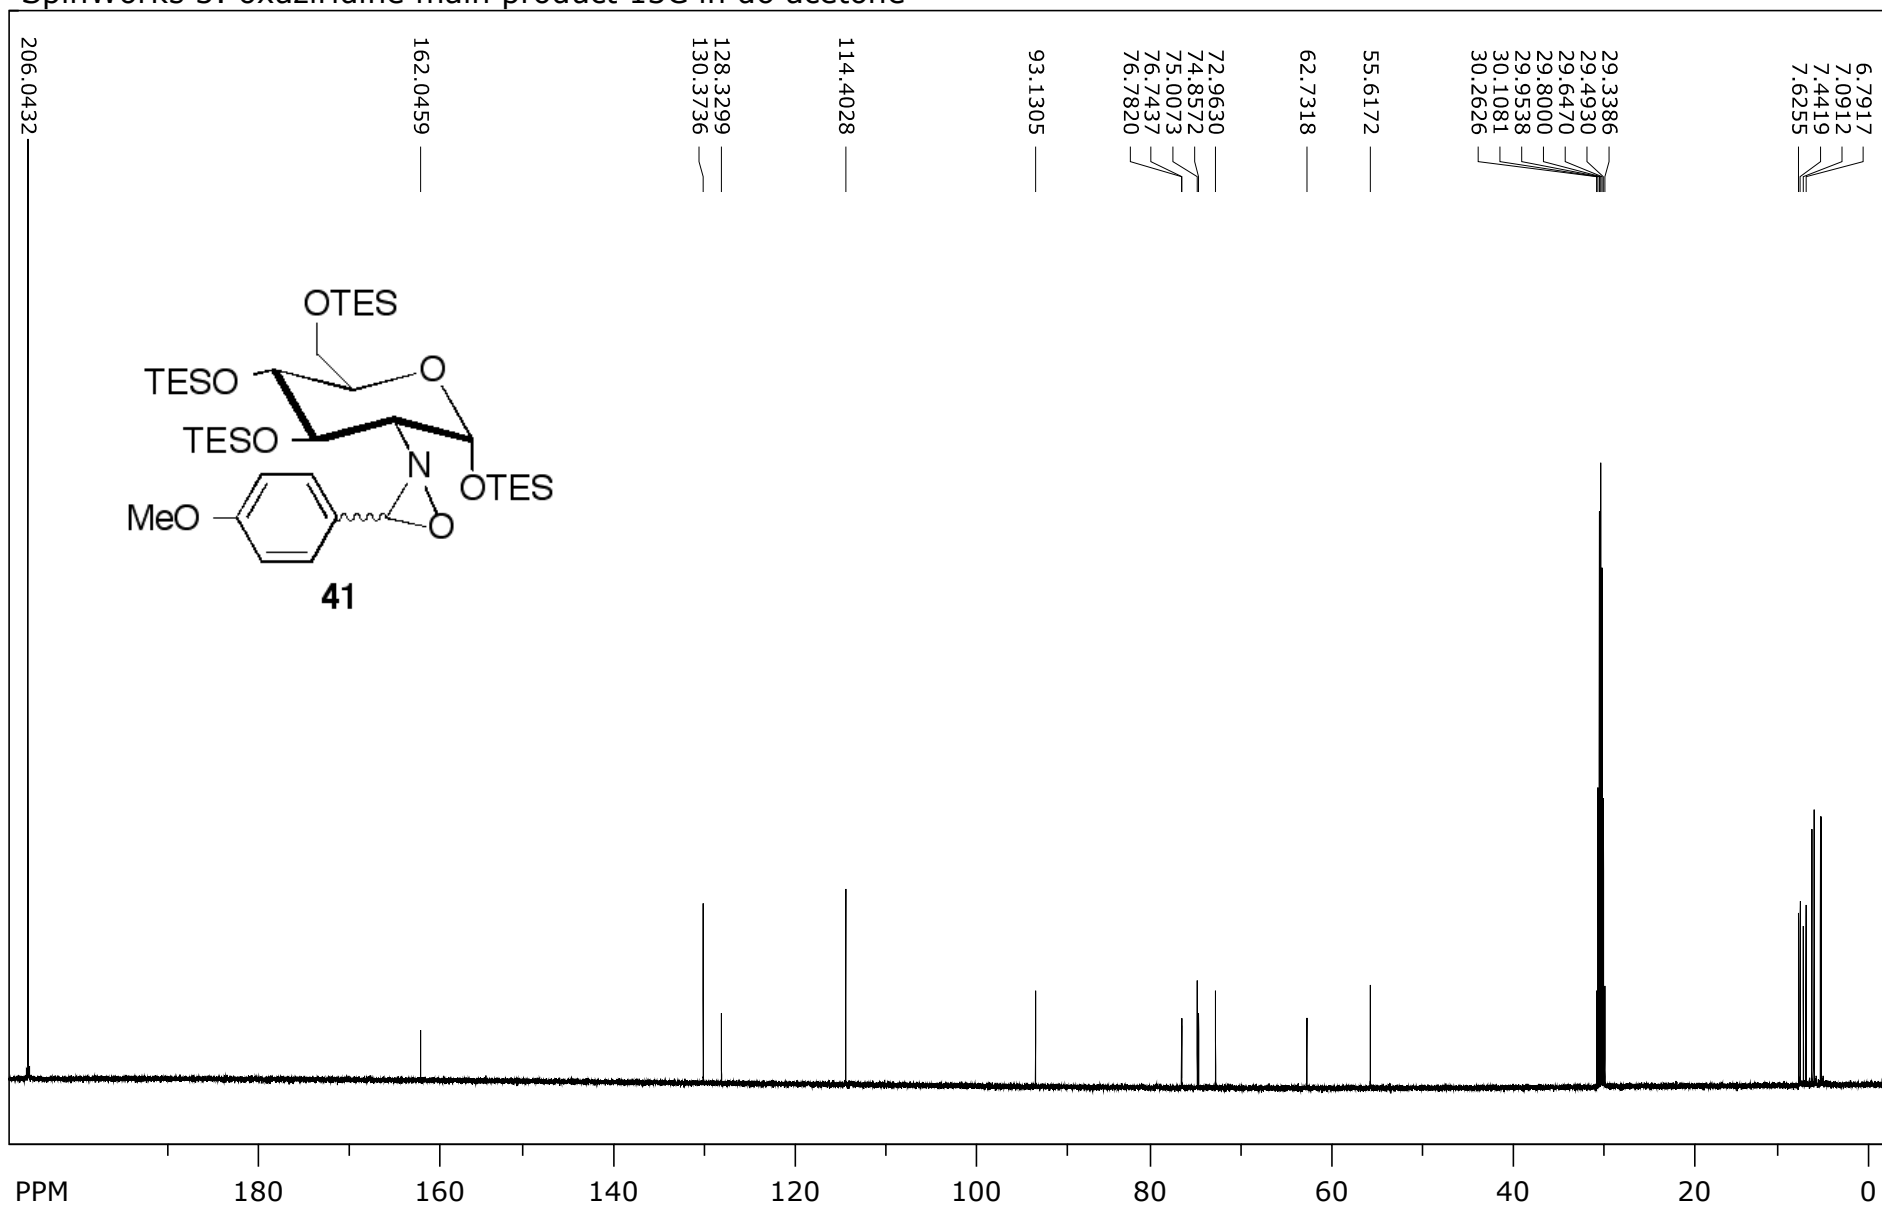

file: ...\_4\oxazir main in acetone-d6\2\fid expt: <zgpg>  
transmitter freq.: 125.699901 MHz  
time domain size: 65536 points  
width: 27777.78 Hz = 220.9849 ppm = 0.423855 Hz/pt  
number of scans: 4096

freq. of 0 ppm: 125.687273 MHz  
processed size: 32768 complex points  
LB: 0.000 GF: 0.0000  
Hz/cm: 1060.356 ppm/cm: 8.43561

|               |                      |             |                      |                 |              |                        |                      |
|---------------|----------------------|-------------|----------------------|-----------------|--------------|------------------------|----------------------|
| Sample Name   | Jeff 45              | Position    | Vial 45              | Instrument Name | Instrument 1 | User Name              | DYL                  |
| Inj Vol       | 1                    | InjPosition |                      | SampleType      | Unknown      | IRM Calibration Status | Success              |
| Data Filename | Direct_Vial 45_Jeff. | ACQ Method  | Direct_small mol_Jef | Comment         |              | Acquired Time          | 8/17/2012 2:05:52 PM |

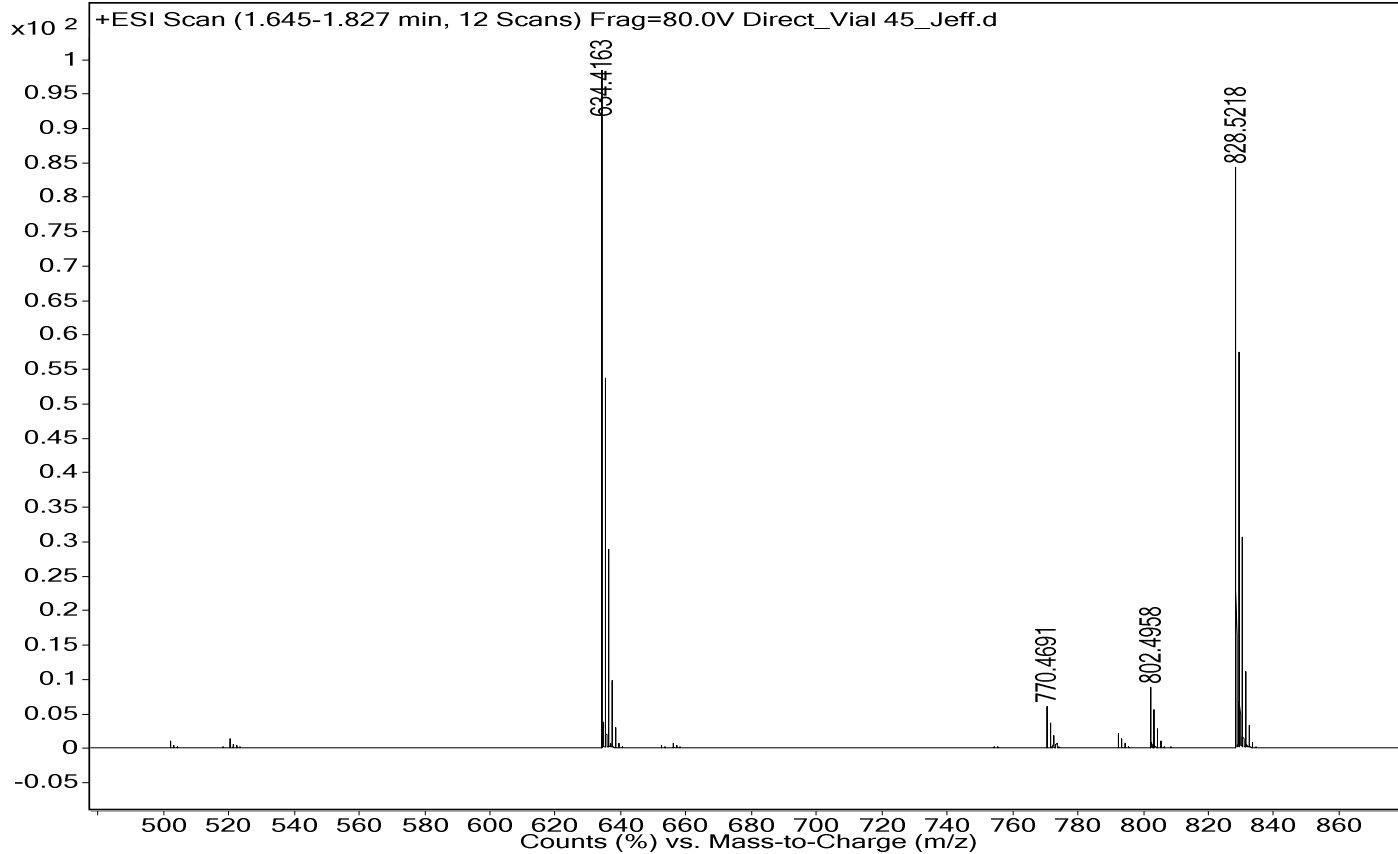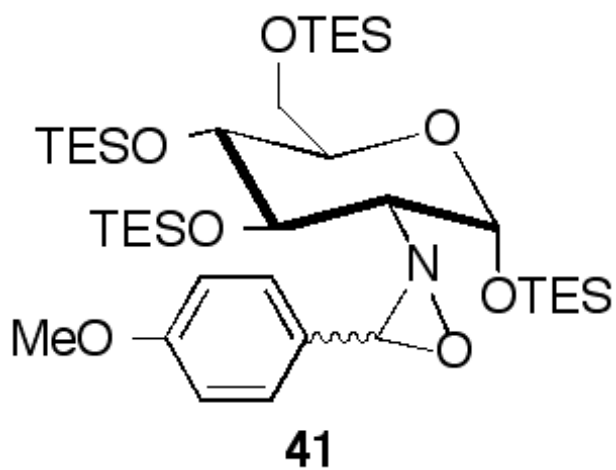

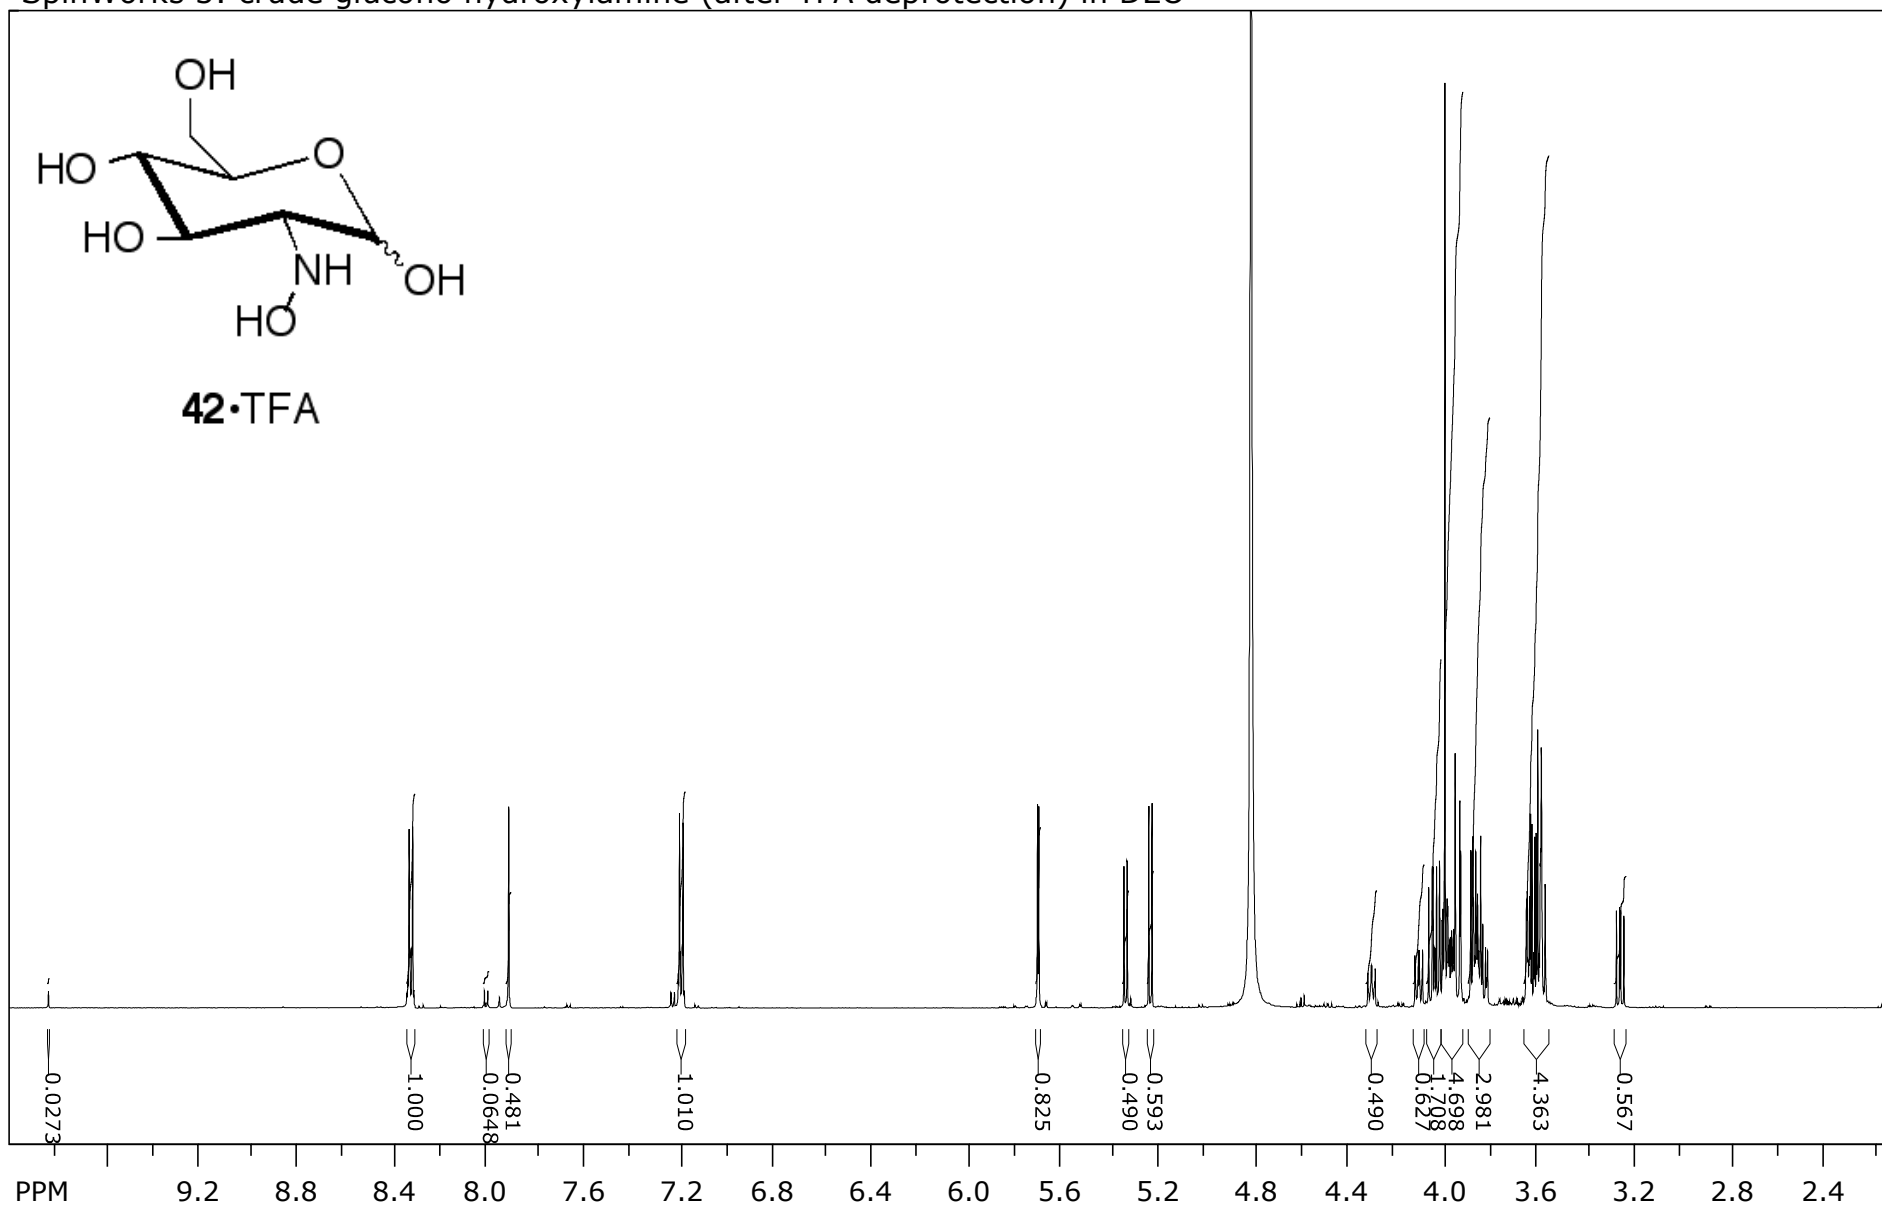

file: ...and 6P\GlcNOHpostTFADpro\_D2O\1\fid expt: <zgr>  
transmitter freq.: 600.553538 MHz  
time domain size: 65536 points  
width: 8417.51 Hz = 14.0162 ppm = 0.128441 Hz/pt  
number of scans: 16

freq. of 0 ppm: 600.549946 MHz  
processed size: 262144 complex points  
LB: 0.000 GF: 0.0000  
Hz/cm: 189.938 ppm/cm: 0.31627

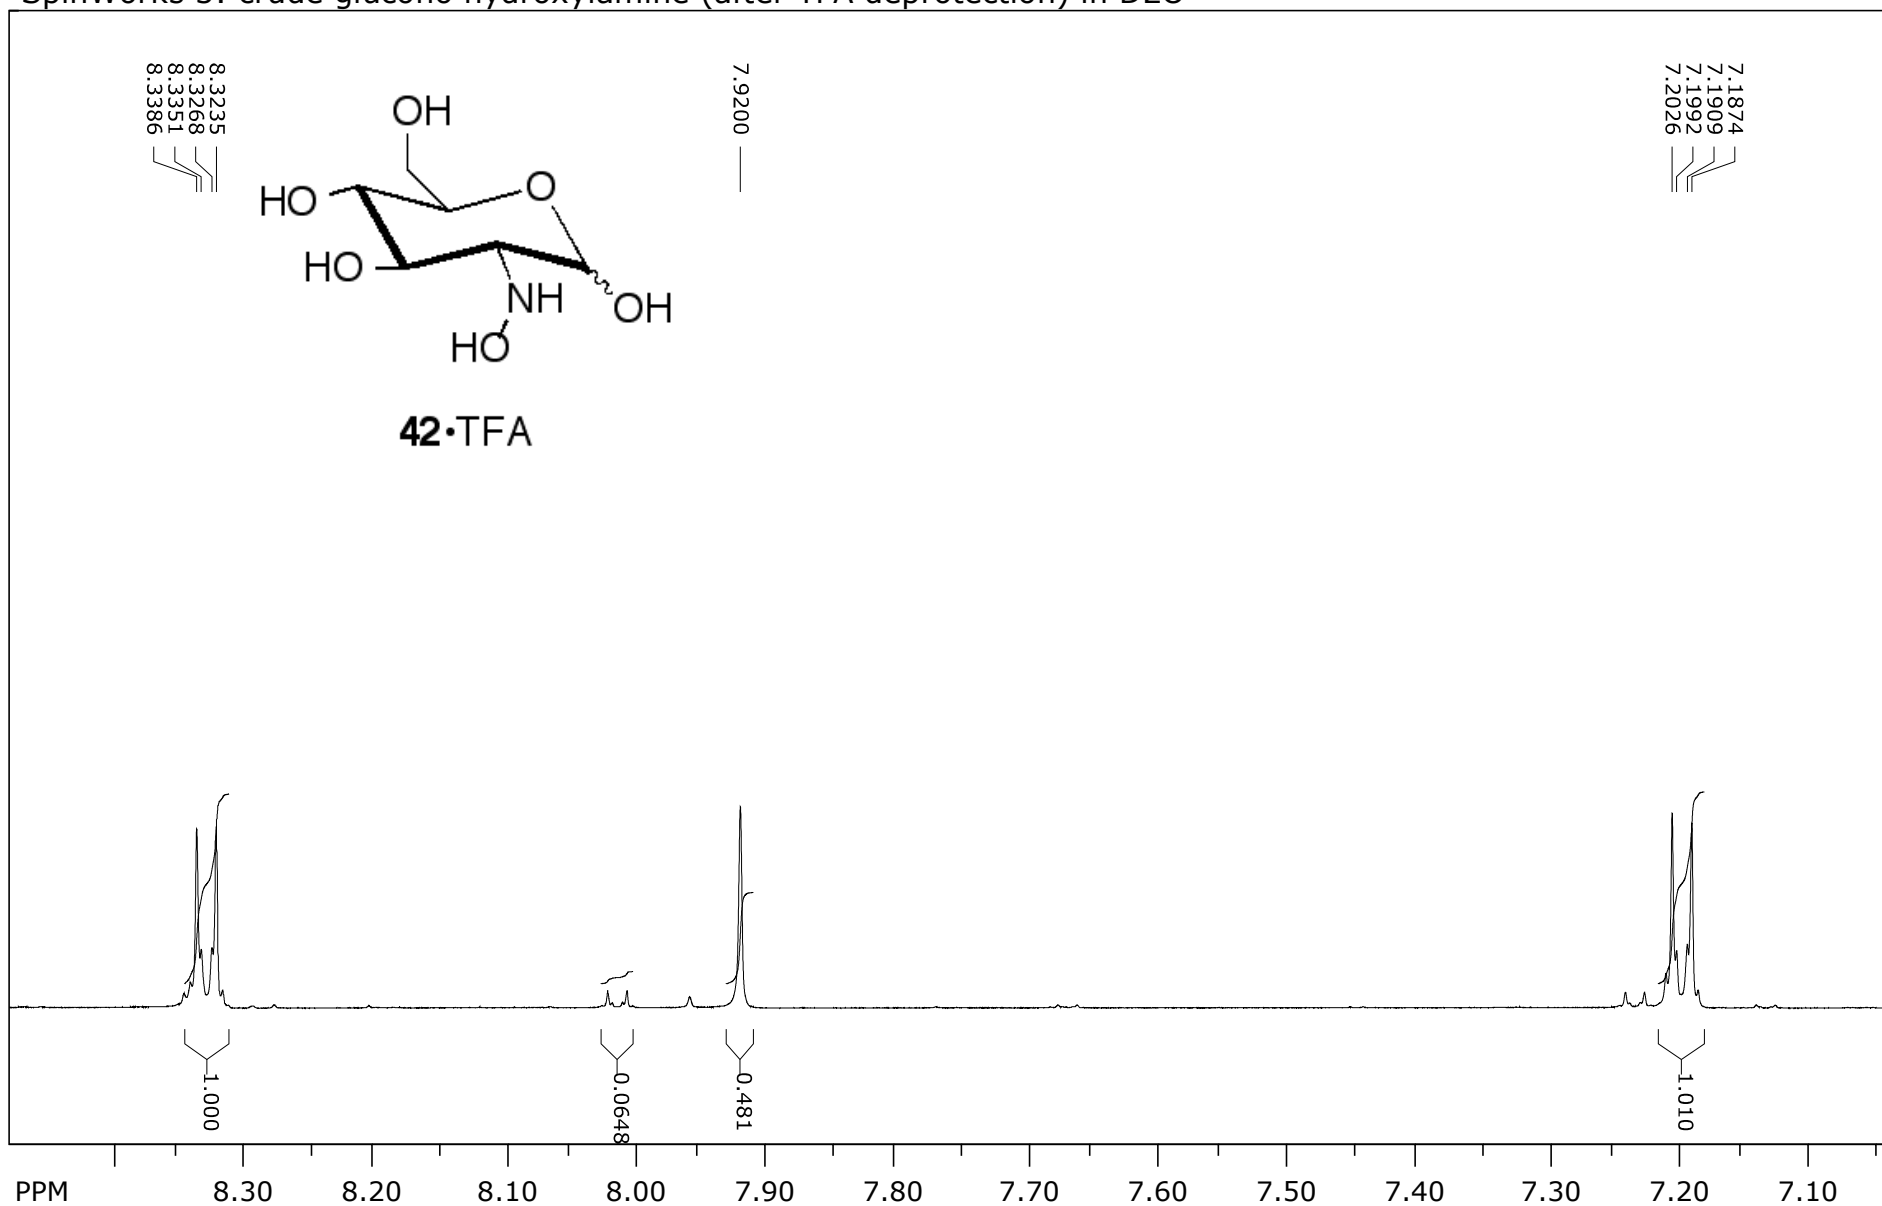

file: ...and 6P\GlcNOHpostTFADpro\_D2O\1\fid expt: <zgr>  
transmitter freq.: 600.553538 MHz  
time domain size: 65536 points  
width: 8417.51 Hz = 14.0162 ppm = 0.128441 Hz/pt  
number of scans: 16

freq. of 0 ppm: 600.549946 MHz  
processed size: 262144 complex points  
LB: 0.000 GF: 0.0000  
Hz/cm: 34.810 ppm/cm: 0.05796

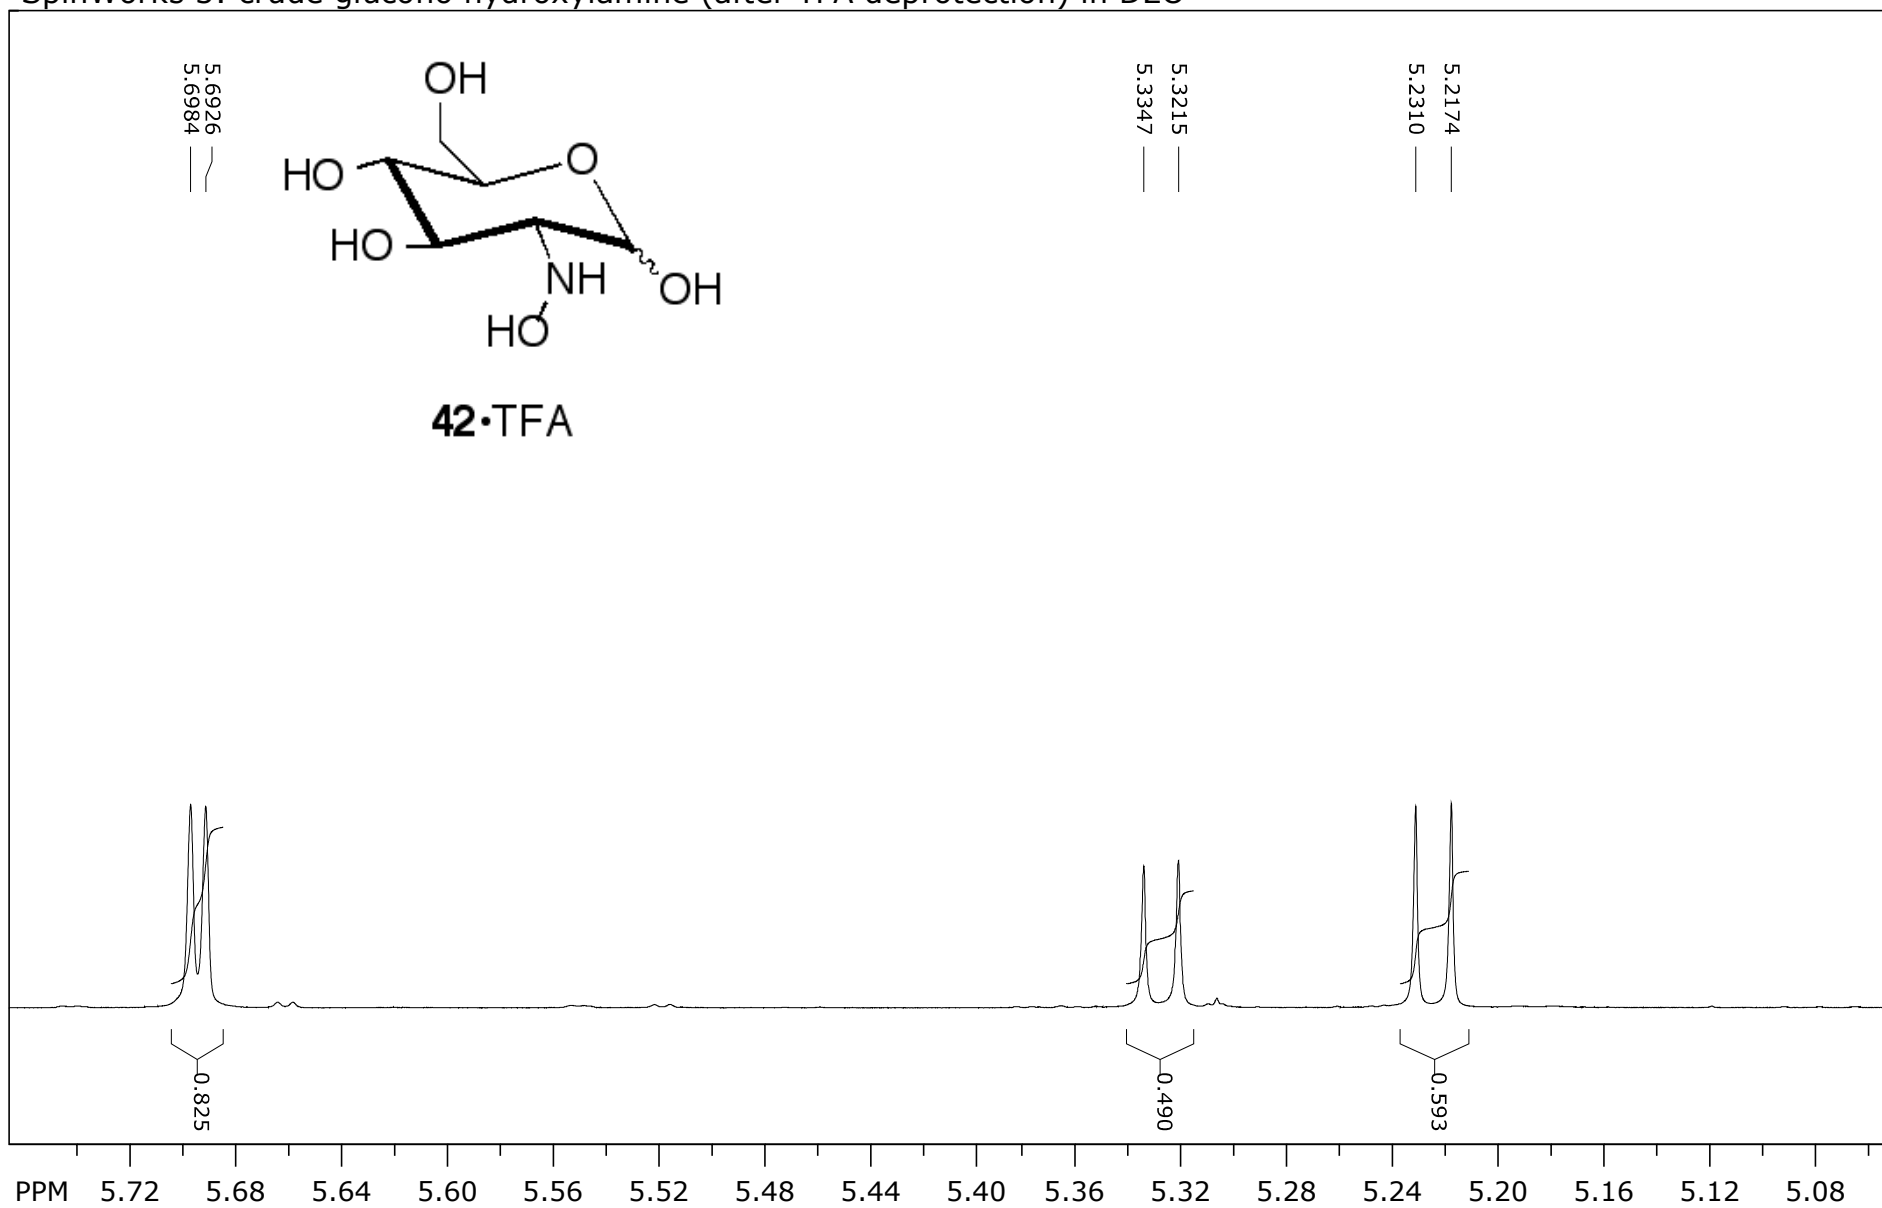

file: ...and 6P\GlcNOHpostTFADpro\_D2O\1\fid expt: <zgpr>  
transmitter freq.: 600.553538 MHz  
time domain size: 65536 points  
width: 8417.51 Hz = 14.0162 ppm = 0.128441 Hz/pt  
number of scans: 16

freq. of 0 ppm: 600.549946 MHz  
processed size: 262144 complex points  
LB: 0.000 GF: 0.0000  
Hz/cm: 17.248 ppm/cm: 0.02872

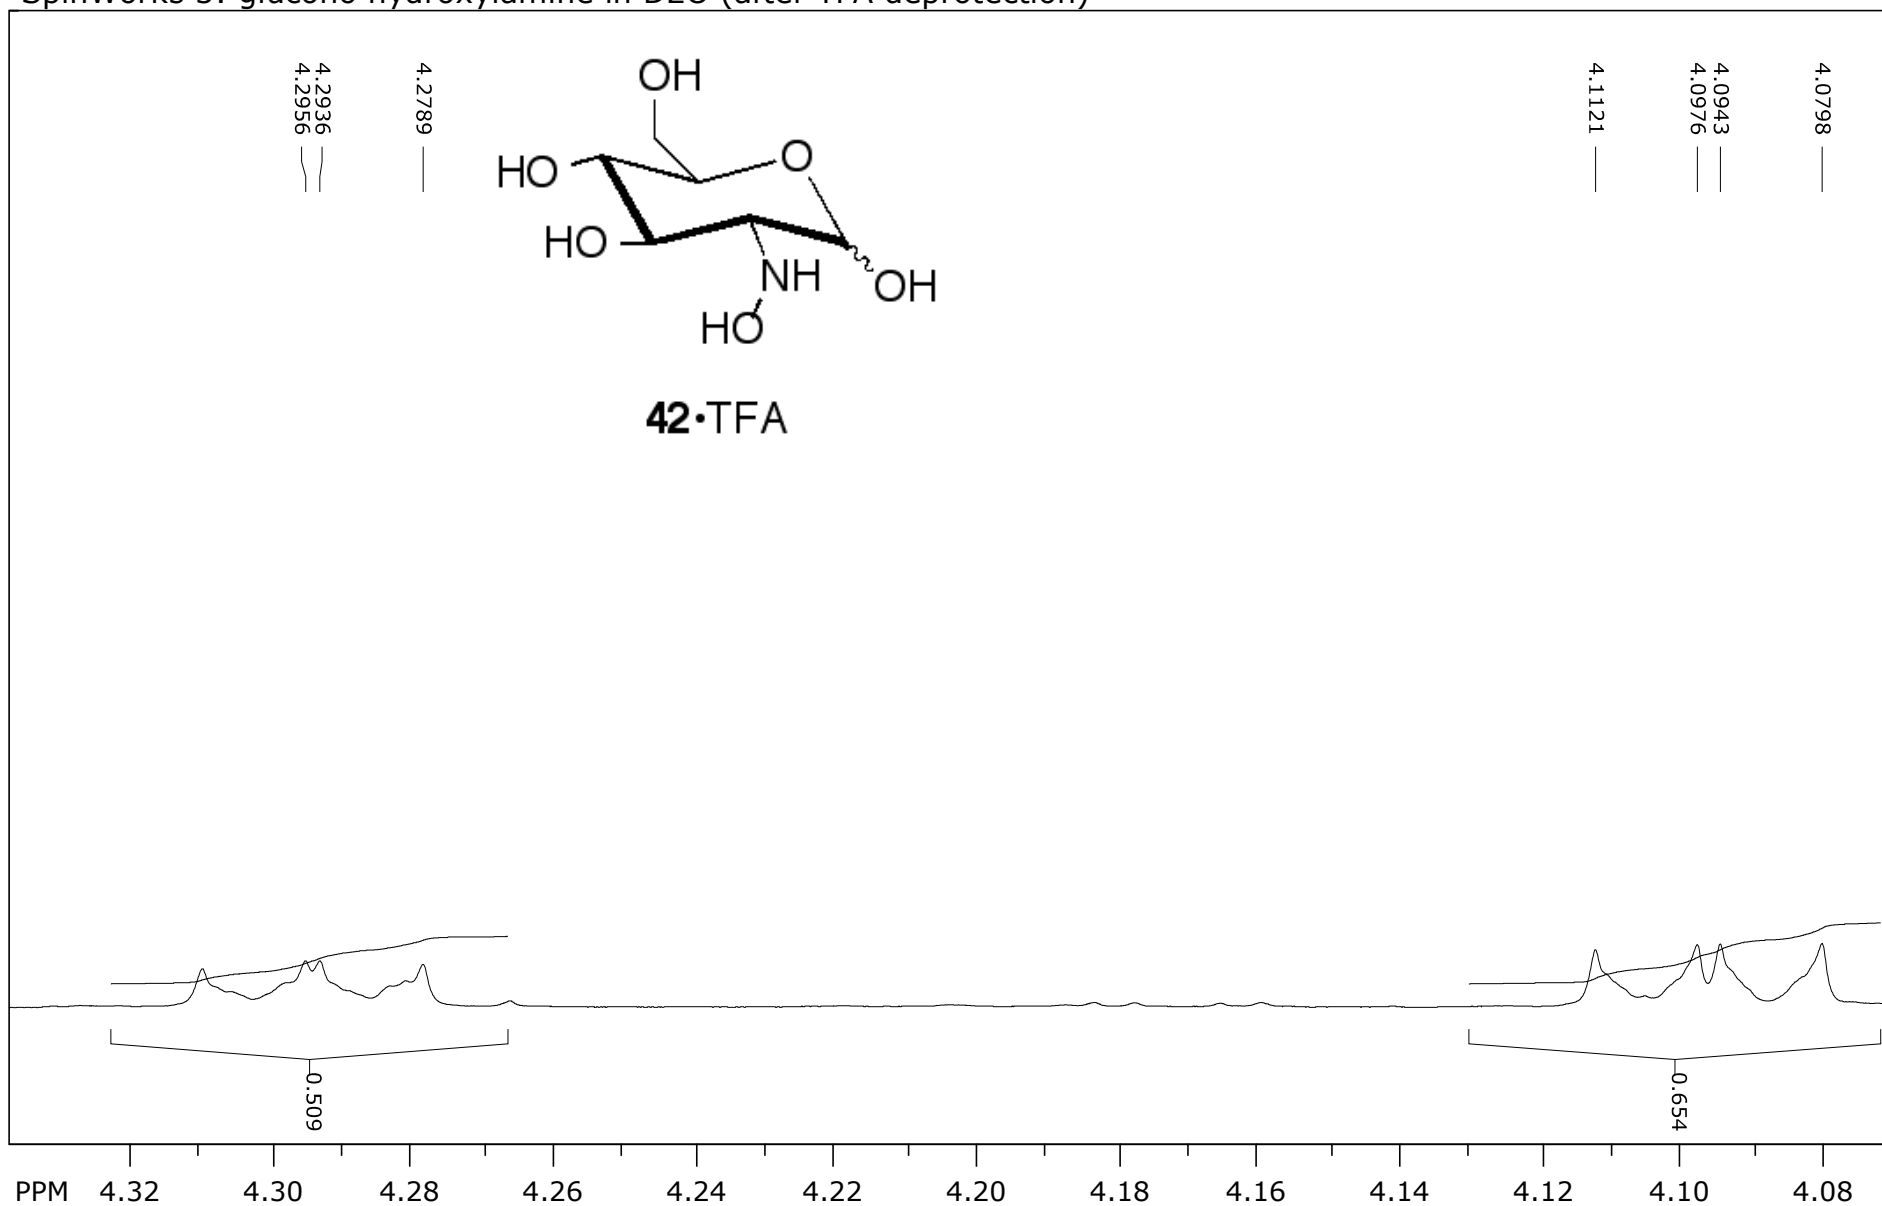

file: ...and 6P\GlcNOHpostTFADpro\_D2O\1\fid expt: <zgpr>  
transmitter freq.: 600.553538 MHz  
time domain size: 65536 points  
width: 8417.51 Hz = 14.0162 ppm = 0.128441 Hz/pt  
number of scans: 16

freq. of 0 ppm: 600.549947 MHz  
processed size: 262144 complex points  
LB: 0.000 GF: 0.0000  
Hz/cm: 6.433 ppm/cm: 0.01071



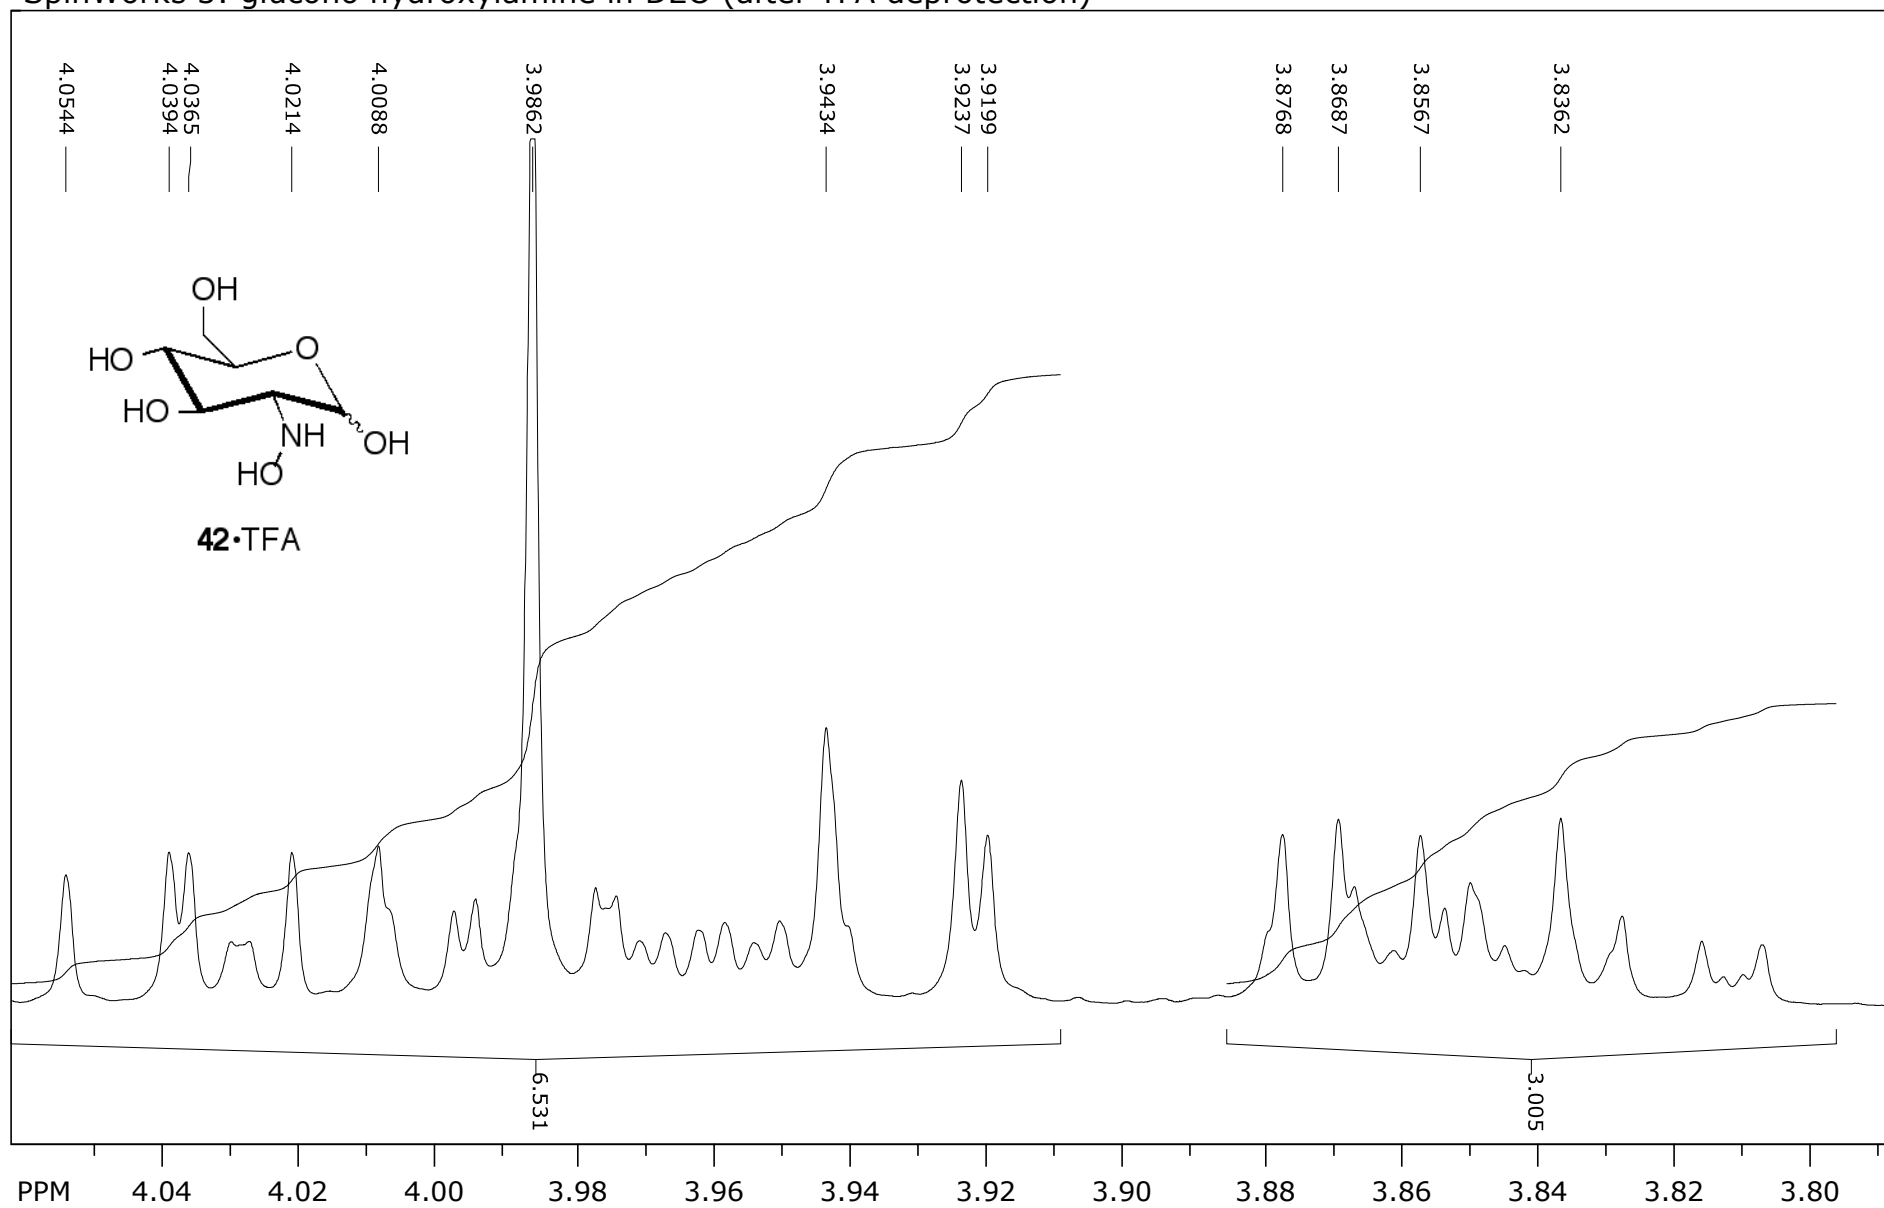

file: ...and 6P\GlcNOHpostTFADpro\_D2O\1\fid expt: <zgpr>  
transmitter freq.: 600.553538 MHz  
time domain size: 65536 points  
width: 8417.51 Hz = 14.0162 ppm = 0.128441 Hz/pt  
number of scans: 16

freq. of 0 ppm: 600.549947 MHz  
processed size: 262144 complex points  
LB: 0.000 GF: 0.0000  
Hz/cm: 6.599 ppm/cm: 0.01099

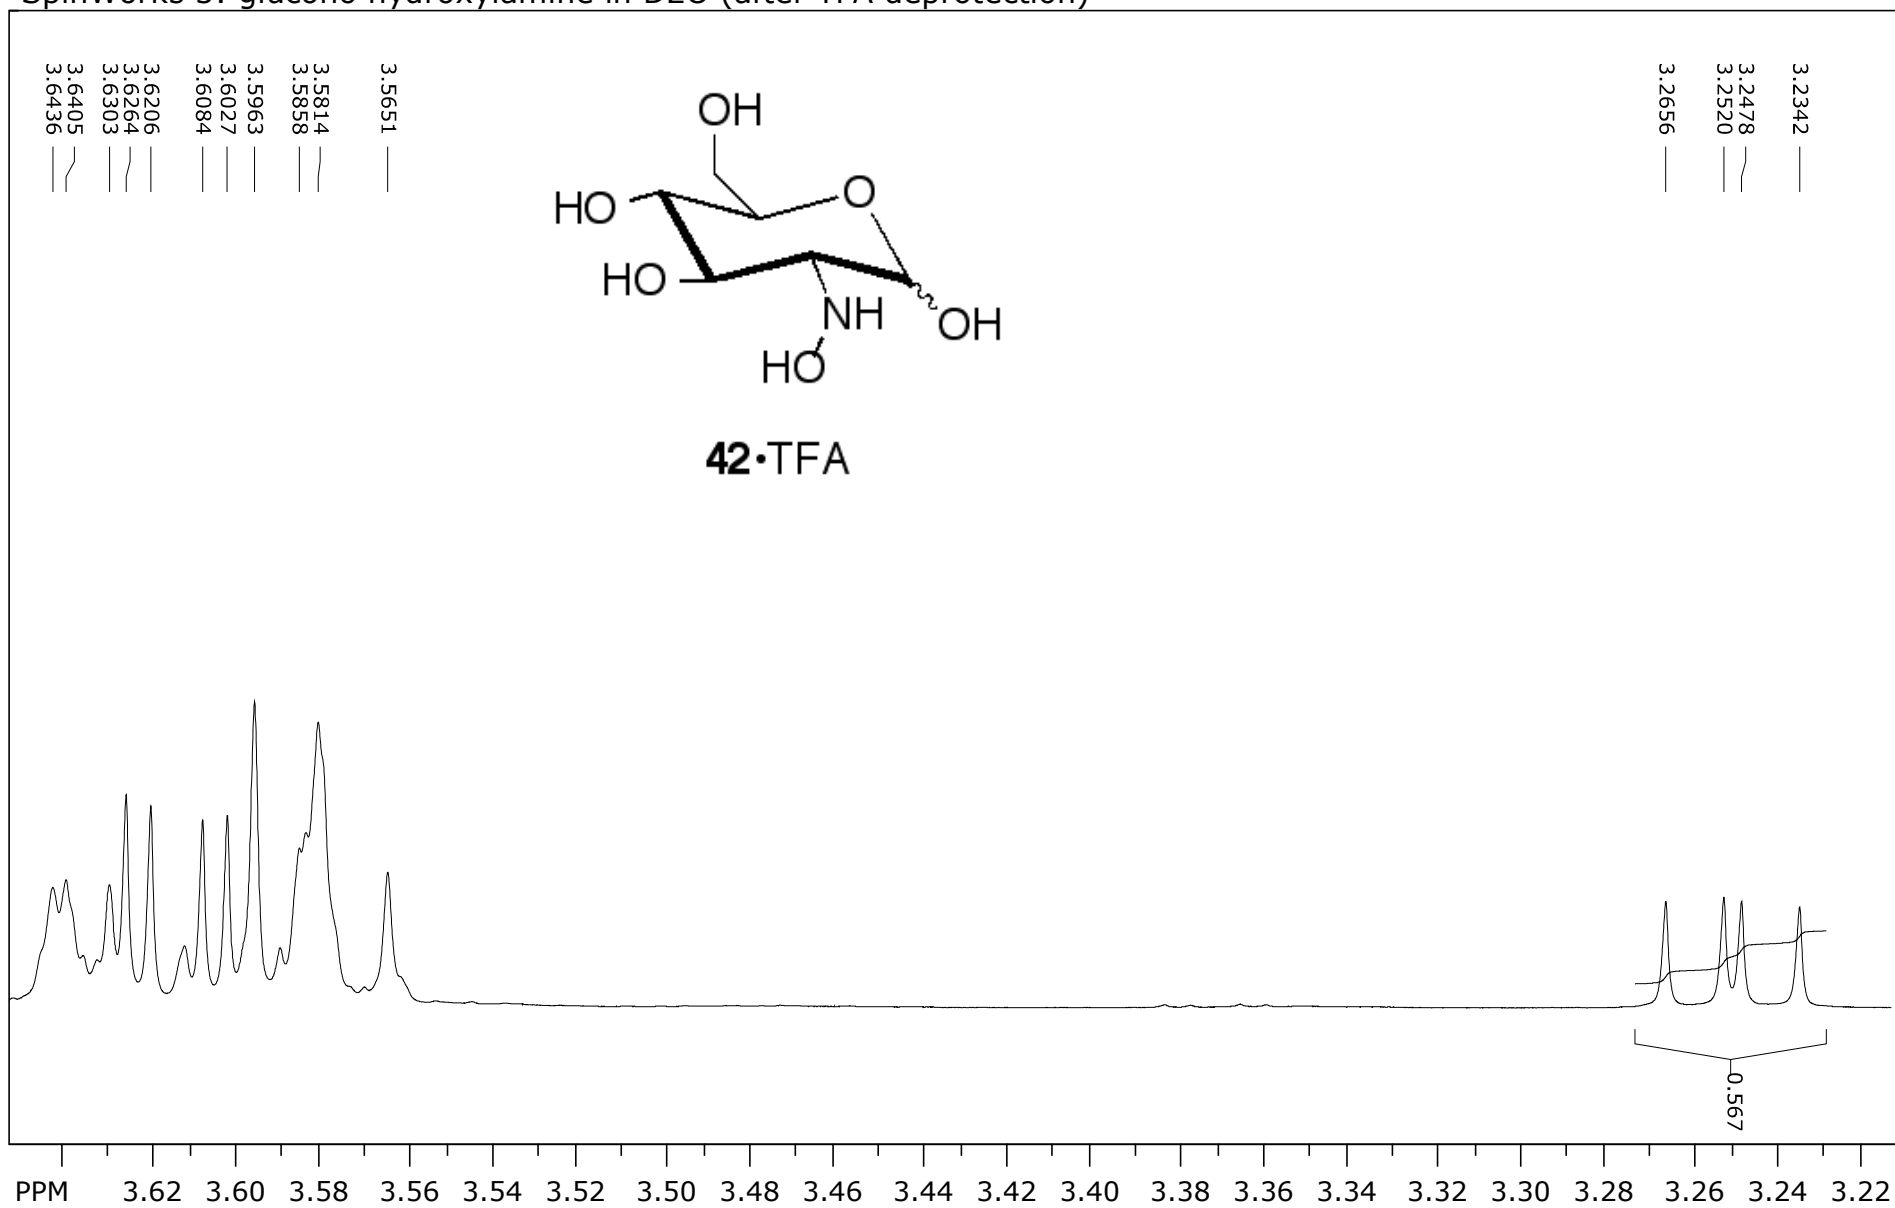

file: ...and 6P\GlcNOHpostTFADpro\_D2O\1\fid expt: <zgr>  
transmitter freq.: 600.553538 MHz  
time domain size: 65536 points  
width: 8417.51 Hz = 14.0162 ppm = 0.128441 Hz/pt  
number of scans: 16

freq. of 0 ppm: 600.549947 MHz  
processed size: 262144 complex points  
LB: 0.000 GF: 0.0000  
Hz/cm: 10.594 ppm/cm: 0.01764

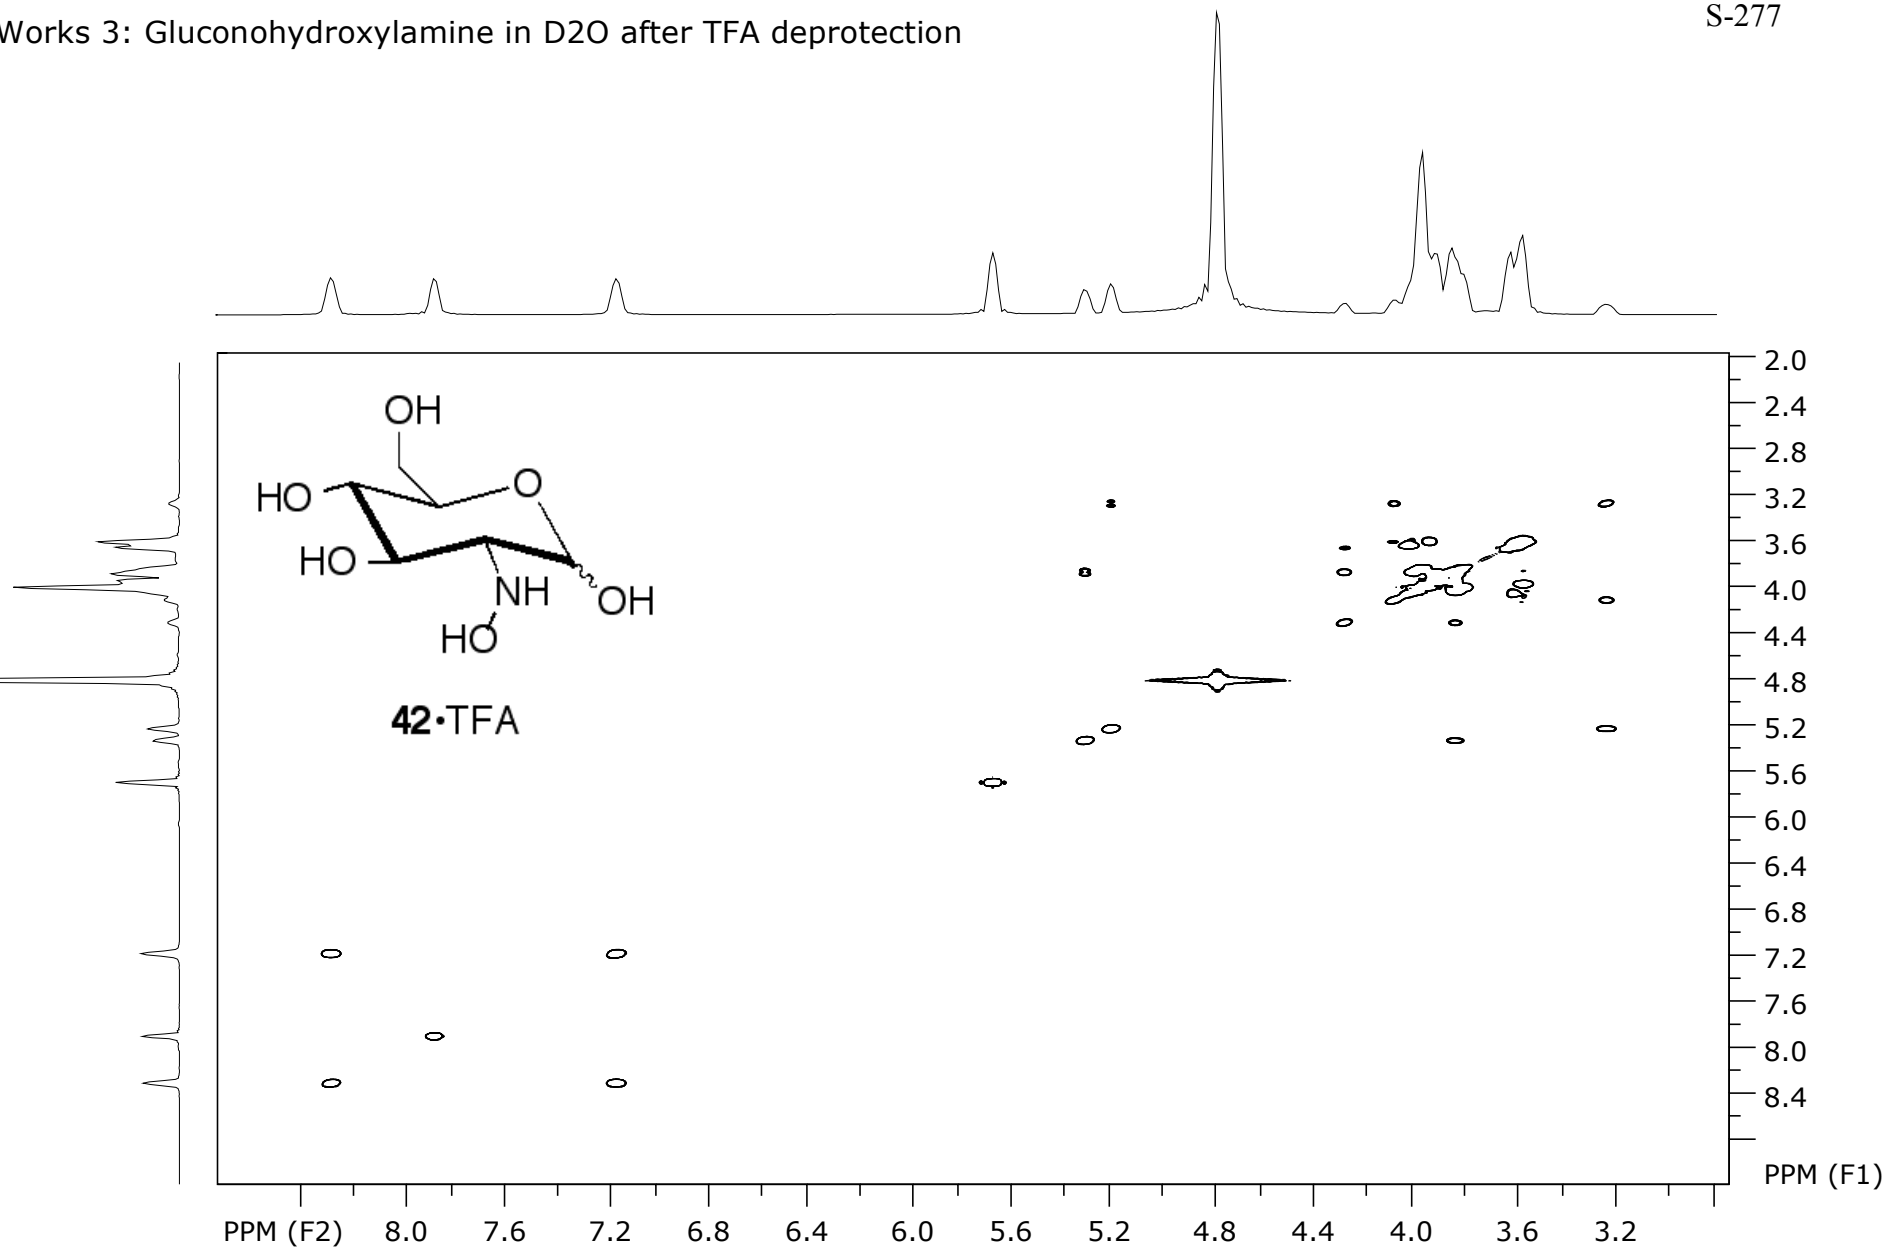

file: ...and 6P\GlcNOH\_frTFApro\_COSY\1\ser  
 expt: <cosygpqf>  
 transmitter freq: 600.552832 MHz  
 time domain size: 1024 by 512 points  
 width (F2): 7211.54 Hz = 12.0082 ppm = 7.0425 Hz/pt  
 number of scans: 1

F2: freq. of 0 ppm: 600.5499623 MHz  
 processed size: 1024 complex points  
 window function: Sine  
 shift: 0.0 degrees  
 Hz/cm: 179.930 ppm/cm: 0.29961

F1: freq. of 0 ppm: 600.5499623 MHz  
 processed size: 1024 complex points  
 window function: Sine  
 shift: 0.0 degrees  
 Hz/cm: 394.257 ppm/cm: 0.65649

with a p-OMe-Benzylidene acetal side product

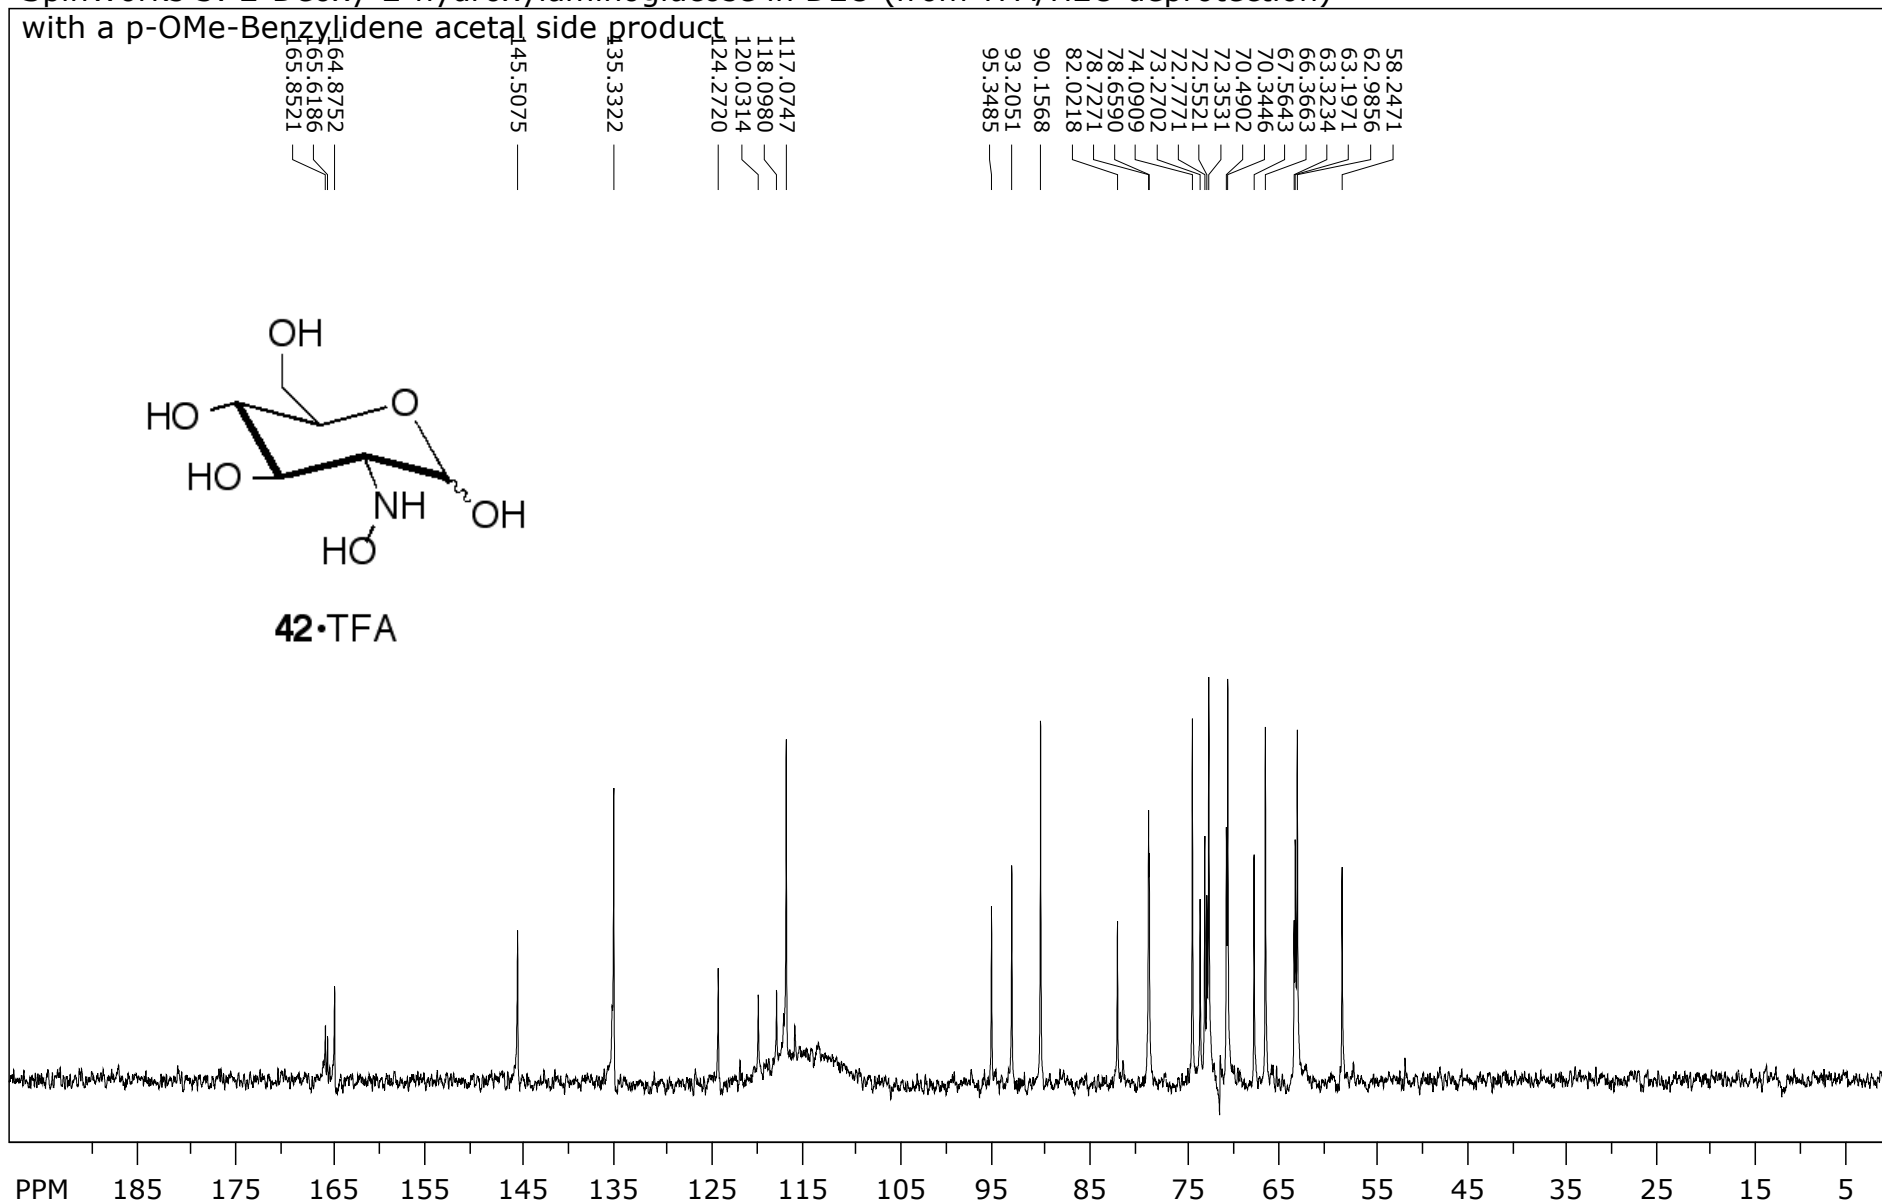

file: ...r\NMR Data\GlcNOHmix\_13C\_D2O\1\fid expt: <zgpg30>  
 transmitter freq.: 151.023519 MHz  
 time domain size: 65536 points  
 width: 36057.69 Hz = 238.7555 ppm = 0.550197 Hz/pt  
 number of scans: 38912

freq. of 0 ppm: 151.008006 MHz  
 processed size: 32768 complex points  
 LB: 10.000 GF: 0.0000  
 Hz/cm: 1203.265 ppm/cm: 7.96740

|               |                      |             |                      |                 |              |                        |                      |
|---------------|----------------------|-------------|----------------------|-----------------|--------------|------------------------|----------------------|
| Sample Name   | Jeff 48              | Position    | Vial 48              | Instrument Name | Instrument 1 | User Name              | DYL                  |
| Inj Vol       | 1                    | InjPosition |                      | SampleType      | Unknown      | IRM Calibration Status | Success              |
| Data Filename | Direct_Vial 48_Jeff. | ACQ Method  | Direct_small mol_Jef | Comment         |              | Acquired Time          | 8/17/2012 2:20:01 PM |

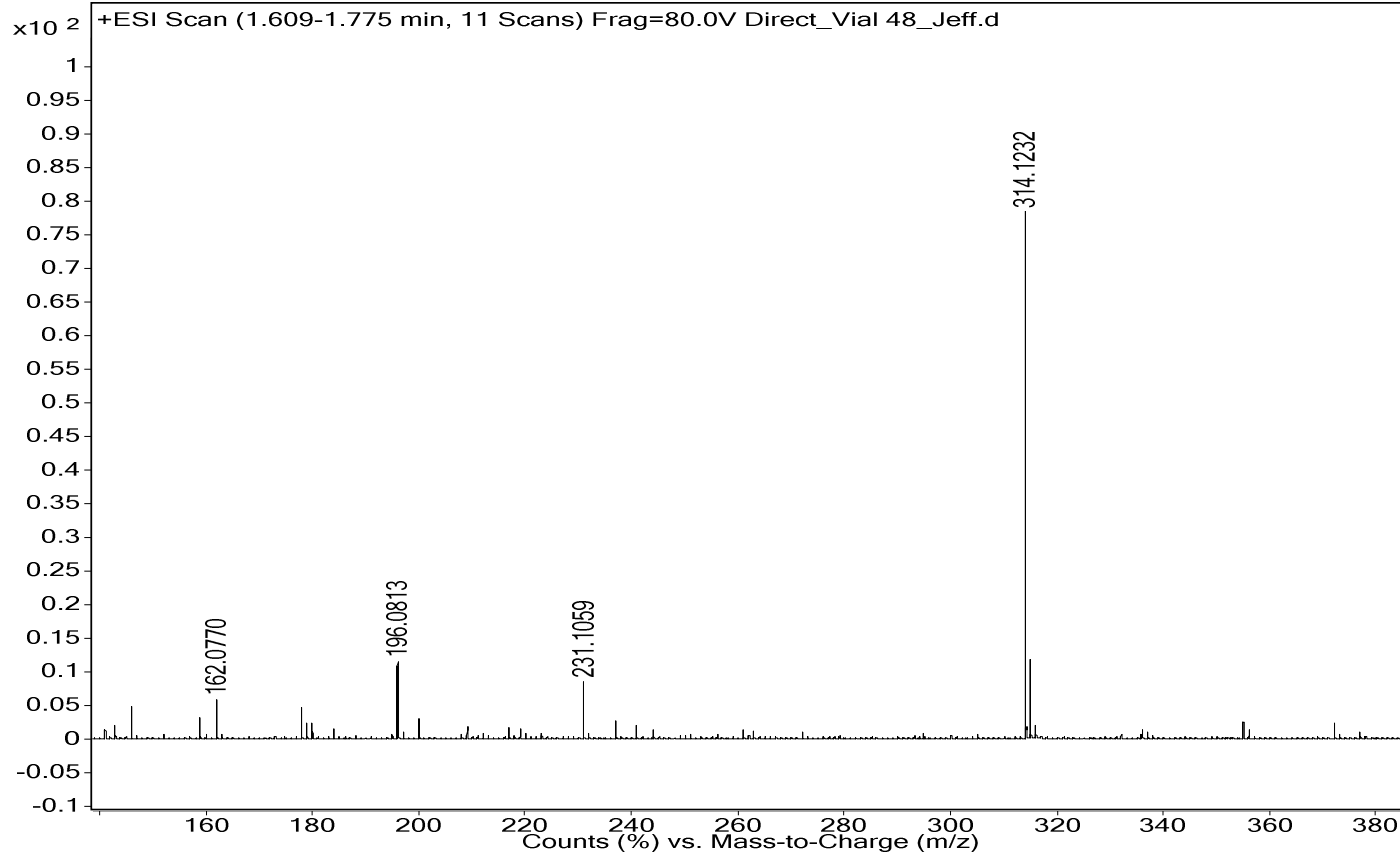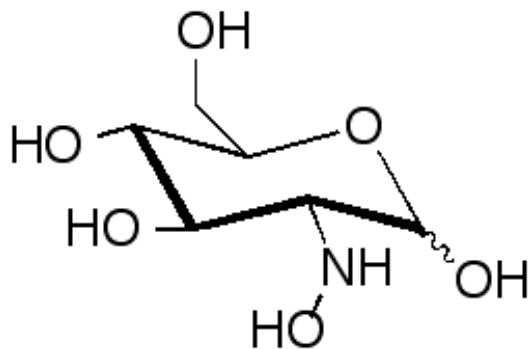

**42•TFA**

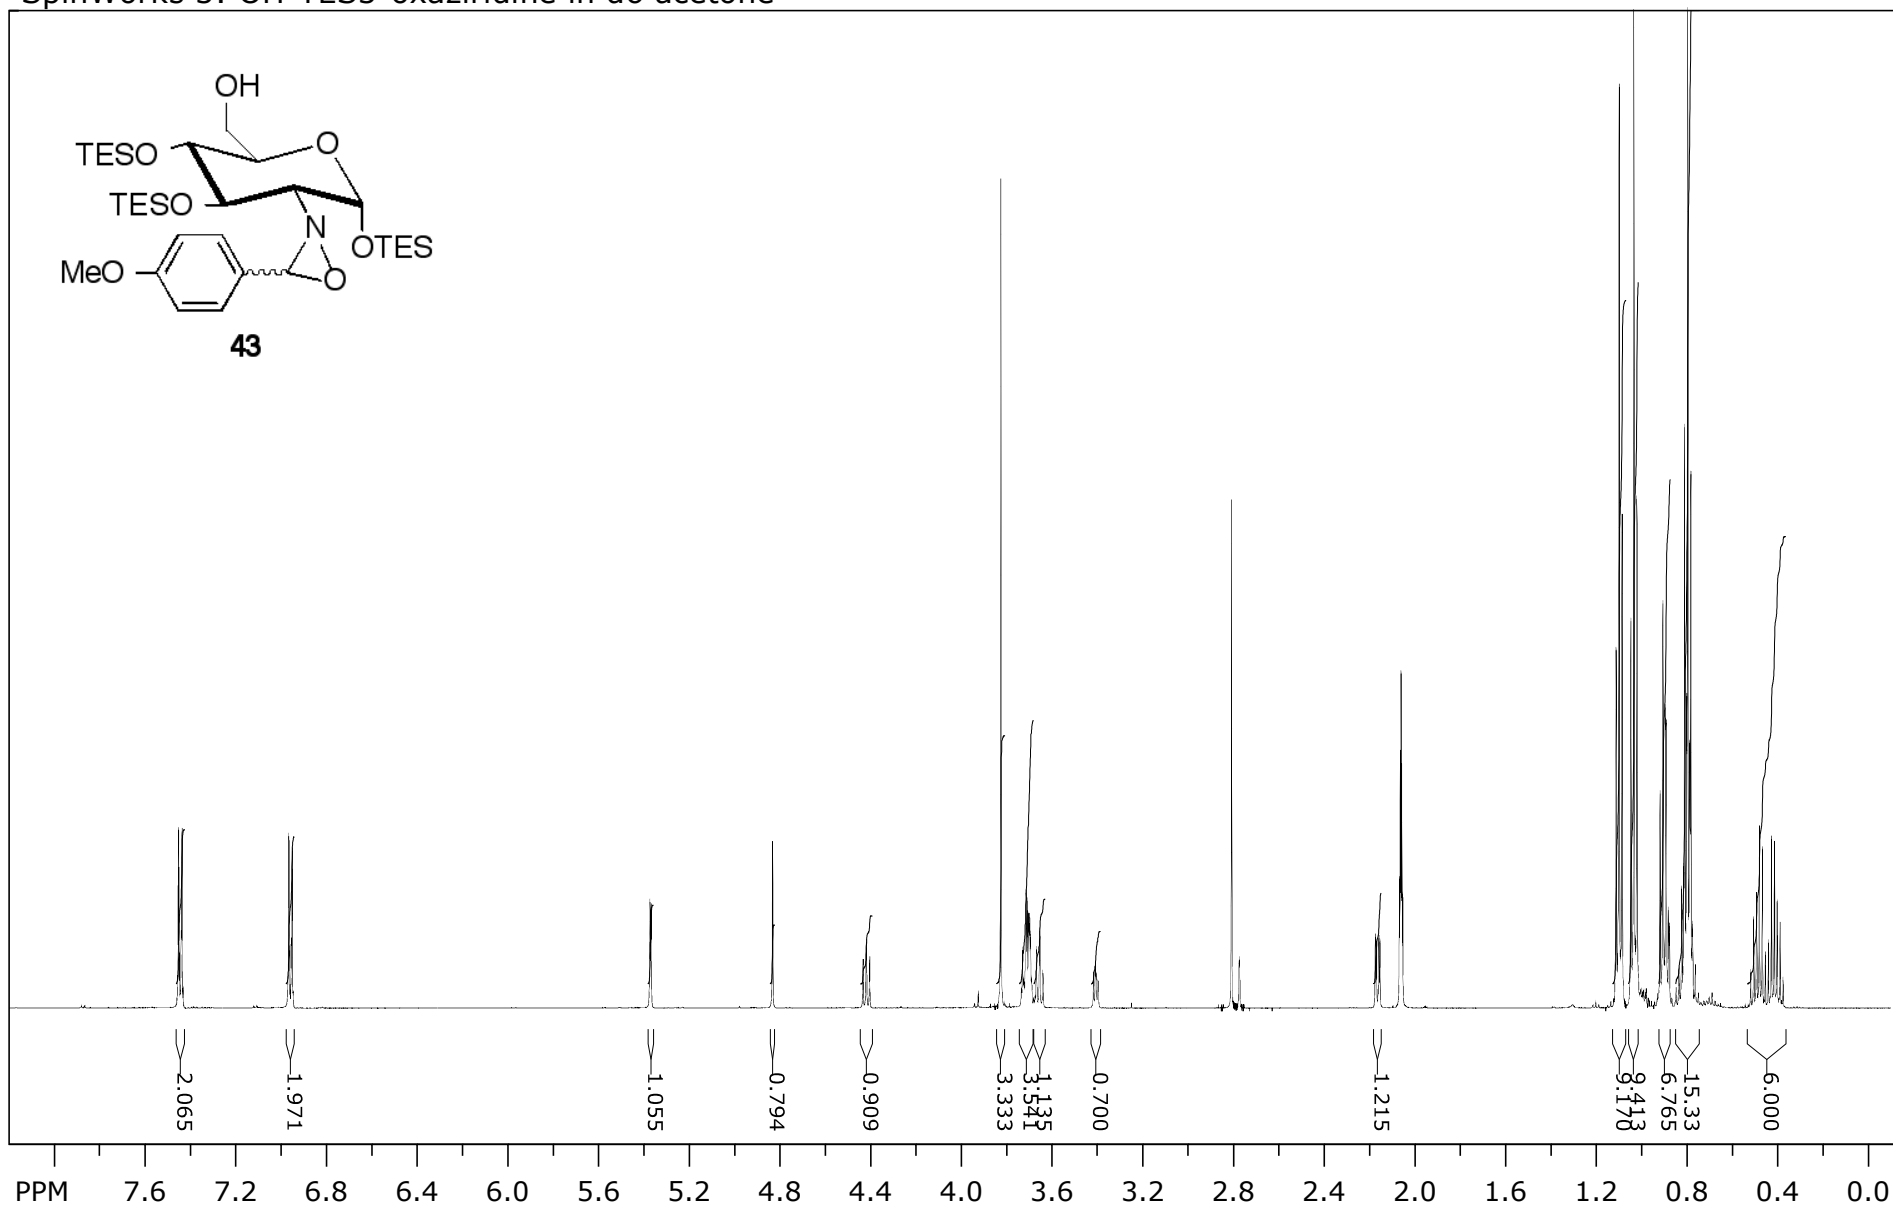

file: ...\Oxaziridines\mainTES3oxazir\1\fid expt: <zgpr>  
transmitter freq.: 600.552832 MHz  
time domain size: 32768 points  
width: 9615.38 Hz = 16.0109 ppm = 0.293438 Hz/pt  
number of scans: 32

freq. of 0 ppm: 600.550010 MHz  
processed size: 32768 complex points  
LB: 0.000 GF: 0.0000  
Hz/cm: 200.034 ppm/cm: 0.33308

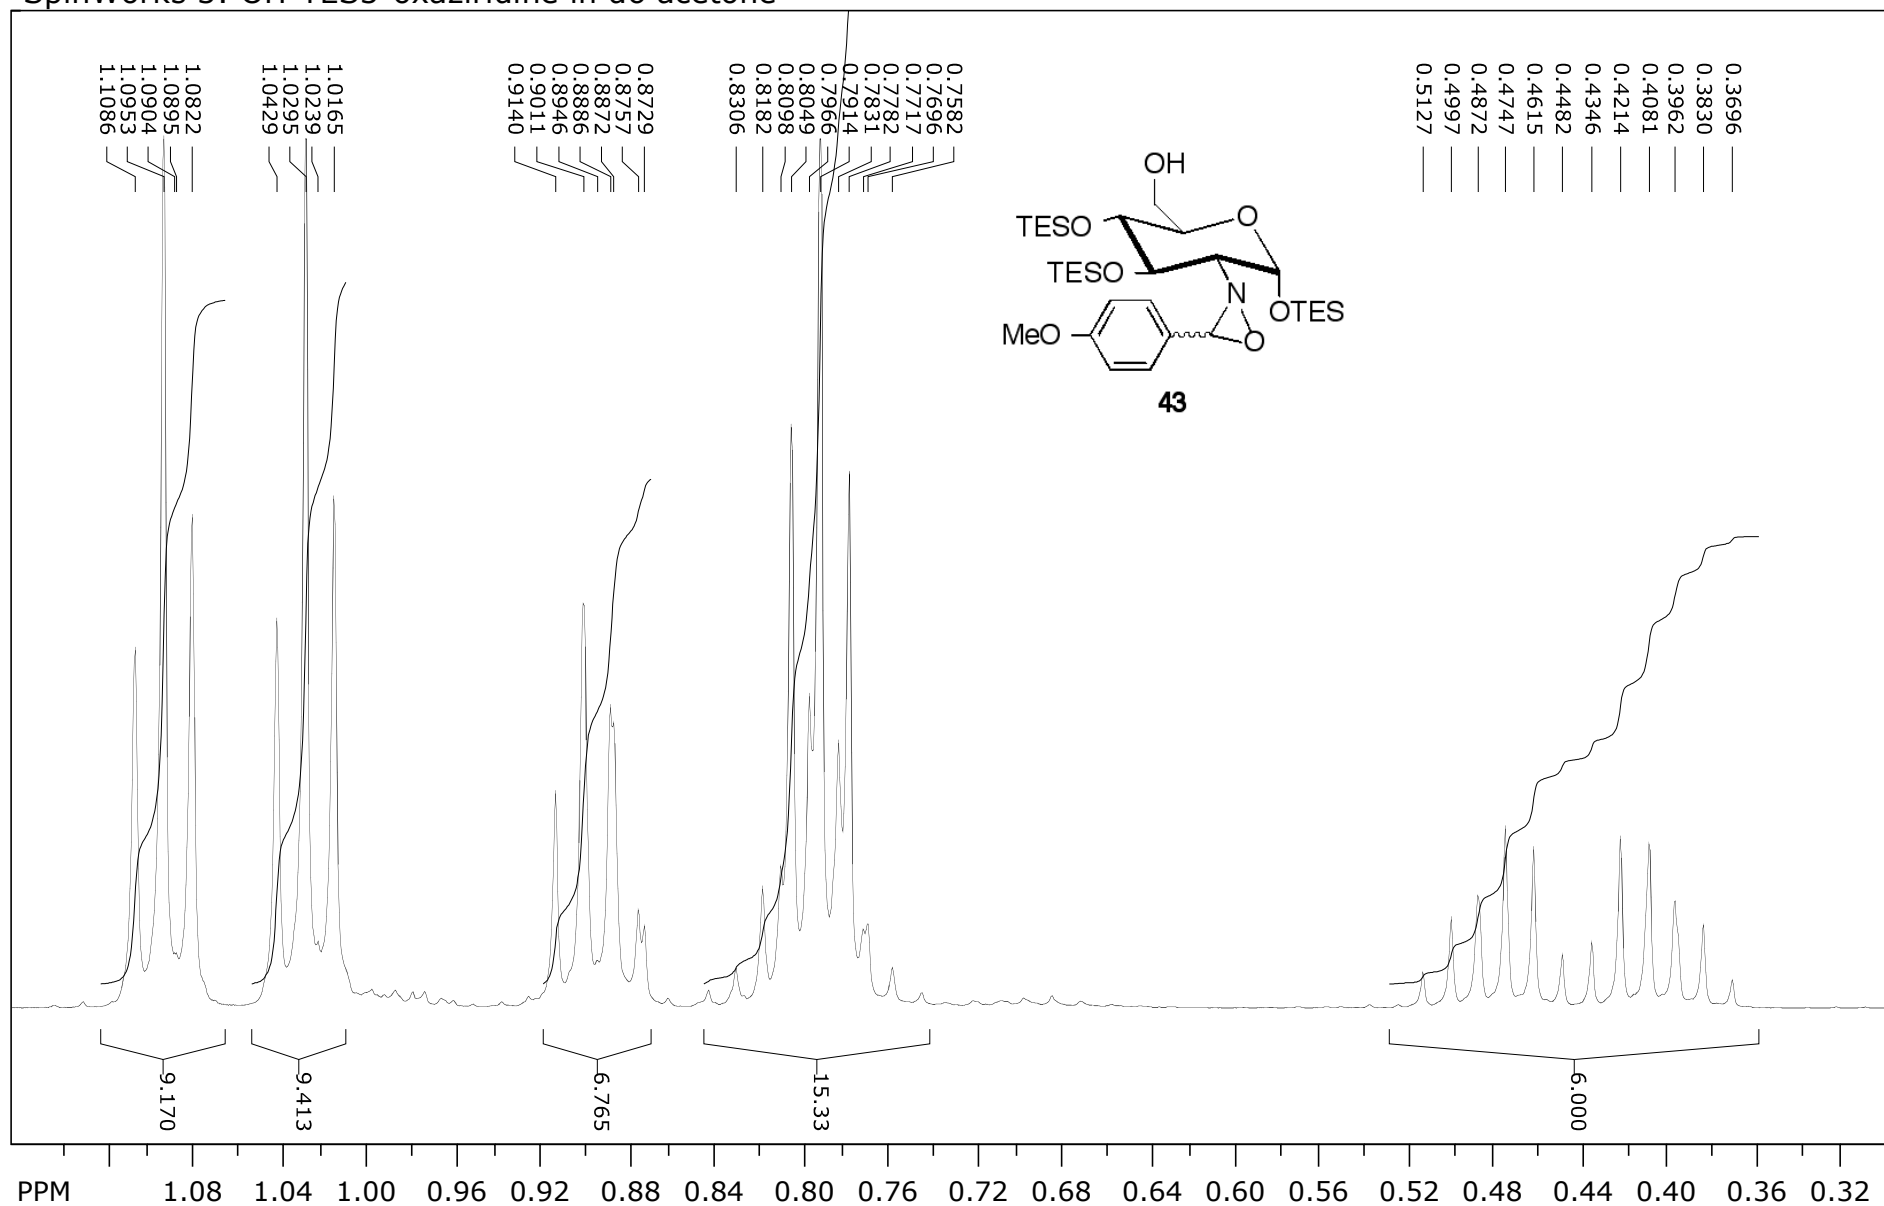

file: ...\Oxaziridines\mainTES3oxazir\1\fid expt: <zgr>  
 transmitter freq.: 600.552832 MHz  
 time domain size: 32768 points  
 width: 9615.38 Hz = 16.0109 ppm = 0.293438 Hz/pt  
 number of scans: 32

freq. of 0 ppm: 600.550010 MHz  
 processed size: 32768 complex points  
 LB: 0.000 GF: 0.0000  
 Hz/cm: 20.917 ppm/cm: 0.03483

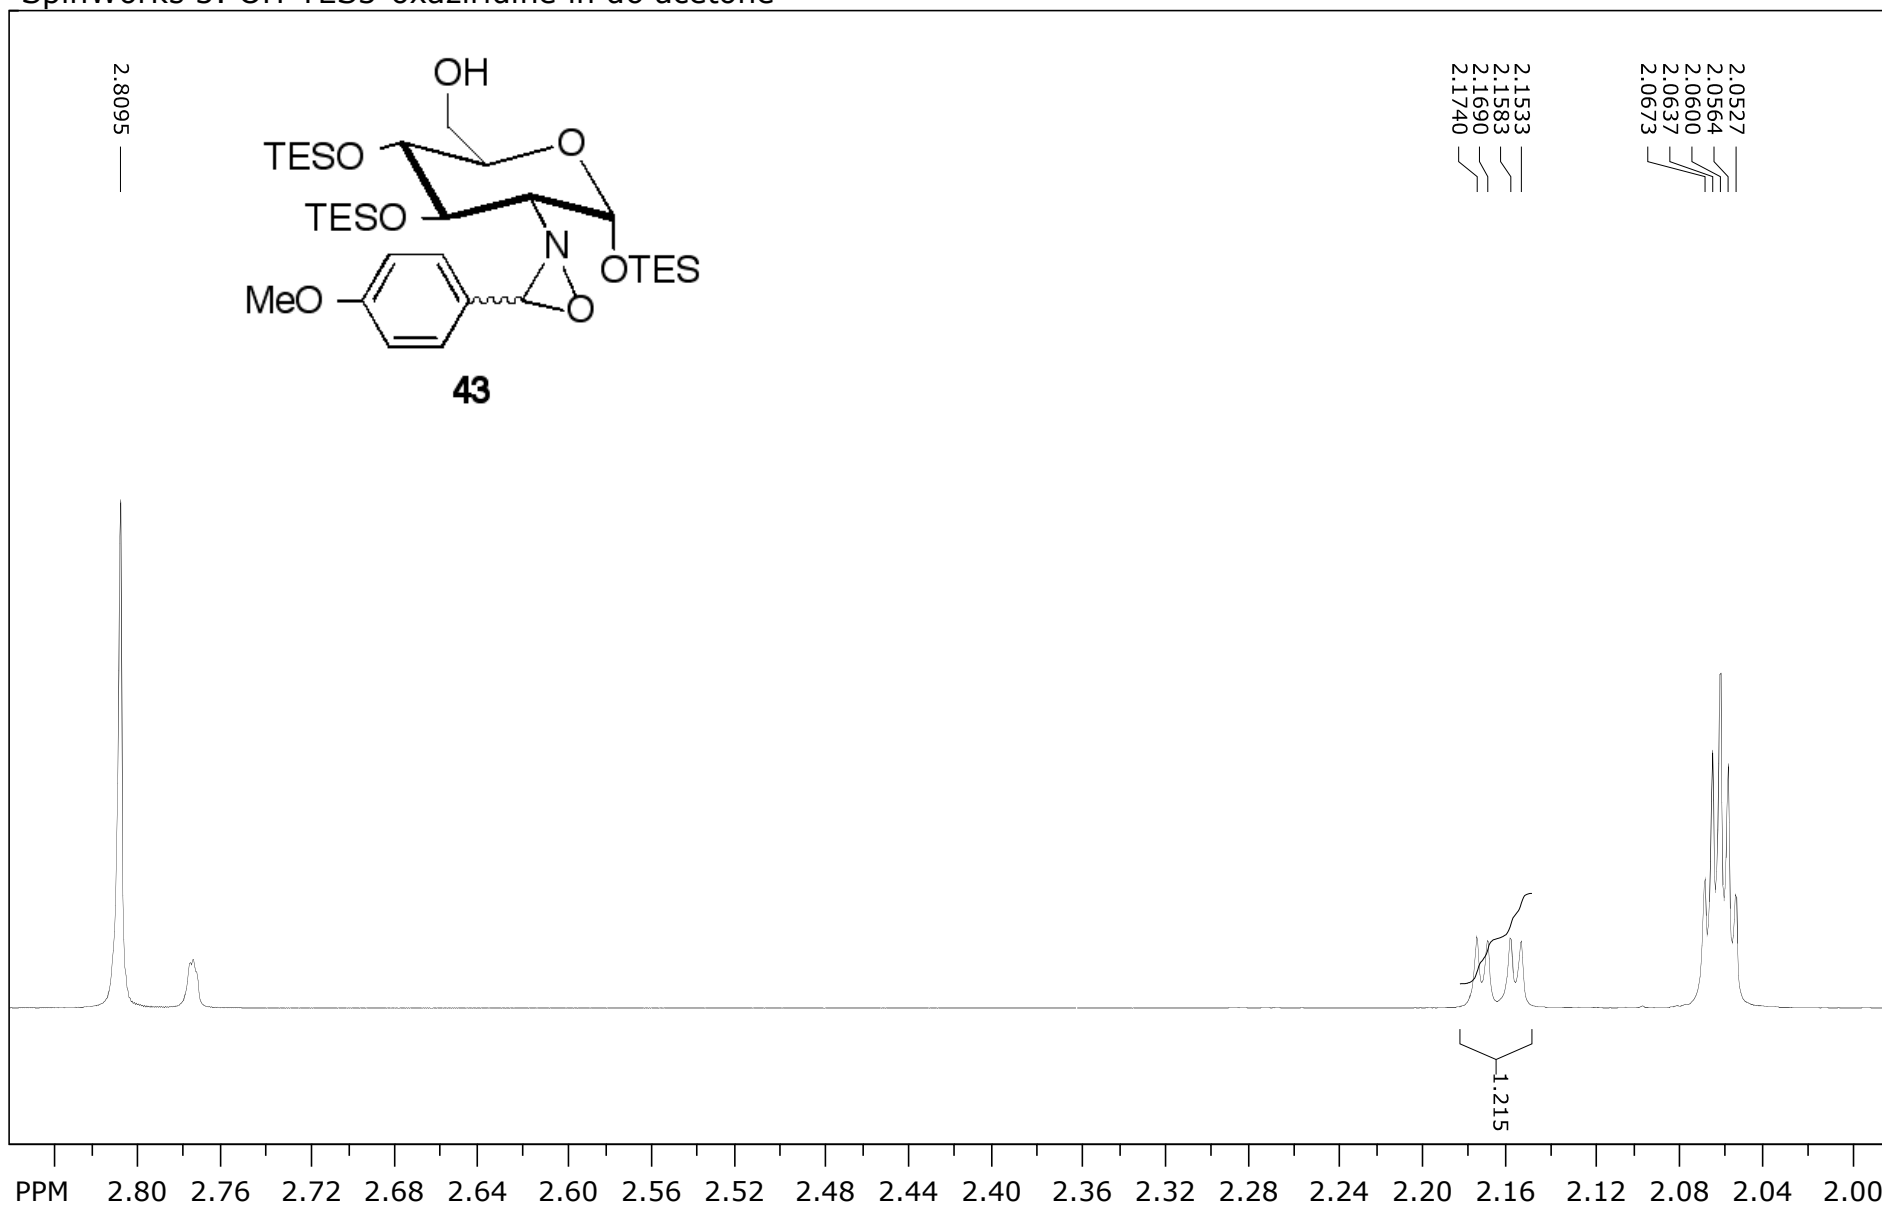

file: ...\Oxaziridines\mainTES3oxazir\1\fid expt: <zgpr>  
transmitter freq.: 600.552832 MHz  
time domain size: 32768 points  
width: 9615.38 Hz = 16.0109 ppm = 0.293438 Hz/pt  
number of scans: 32

freq. of 0 ppm: 600.550010 MHz  
processed size: 32768 complex points  
LB: 0.000 GF: 0.0000  
Hz/cm: 21.179 ppm/cm: 0.03527



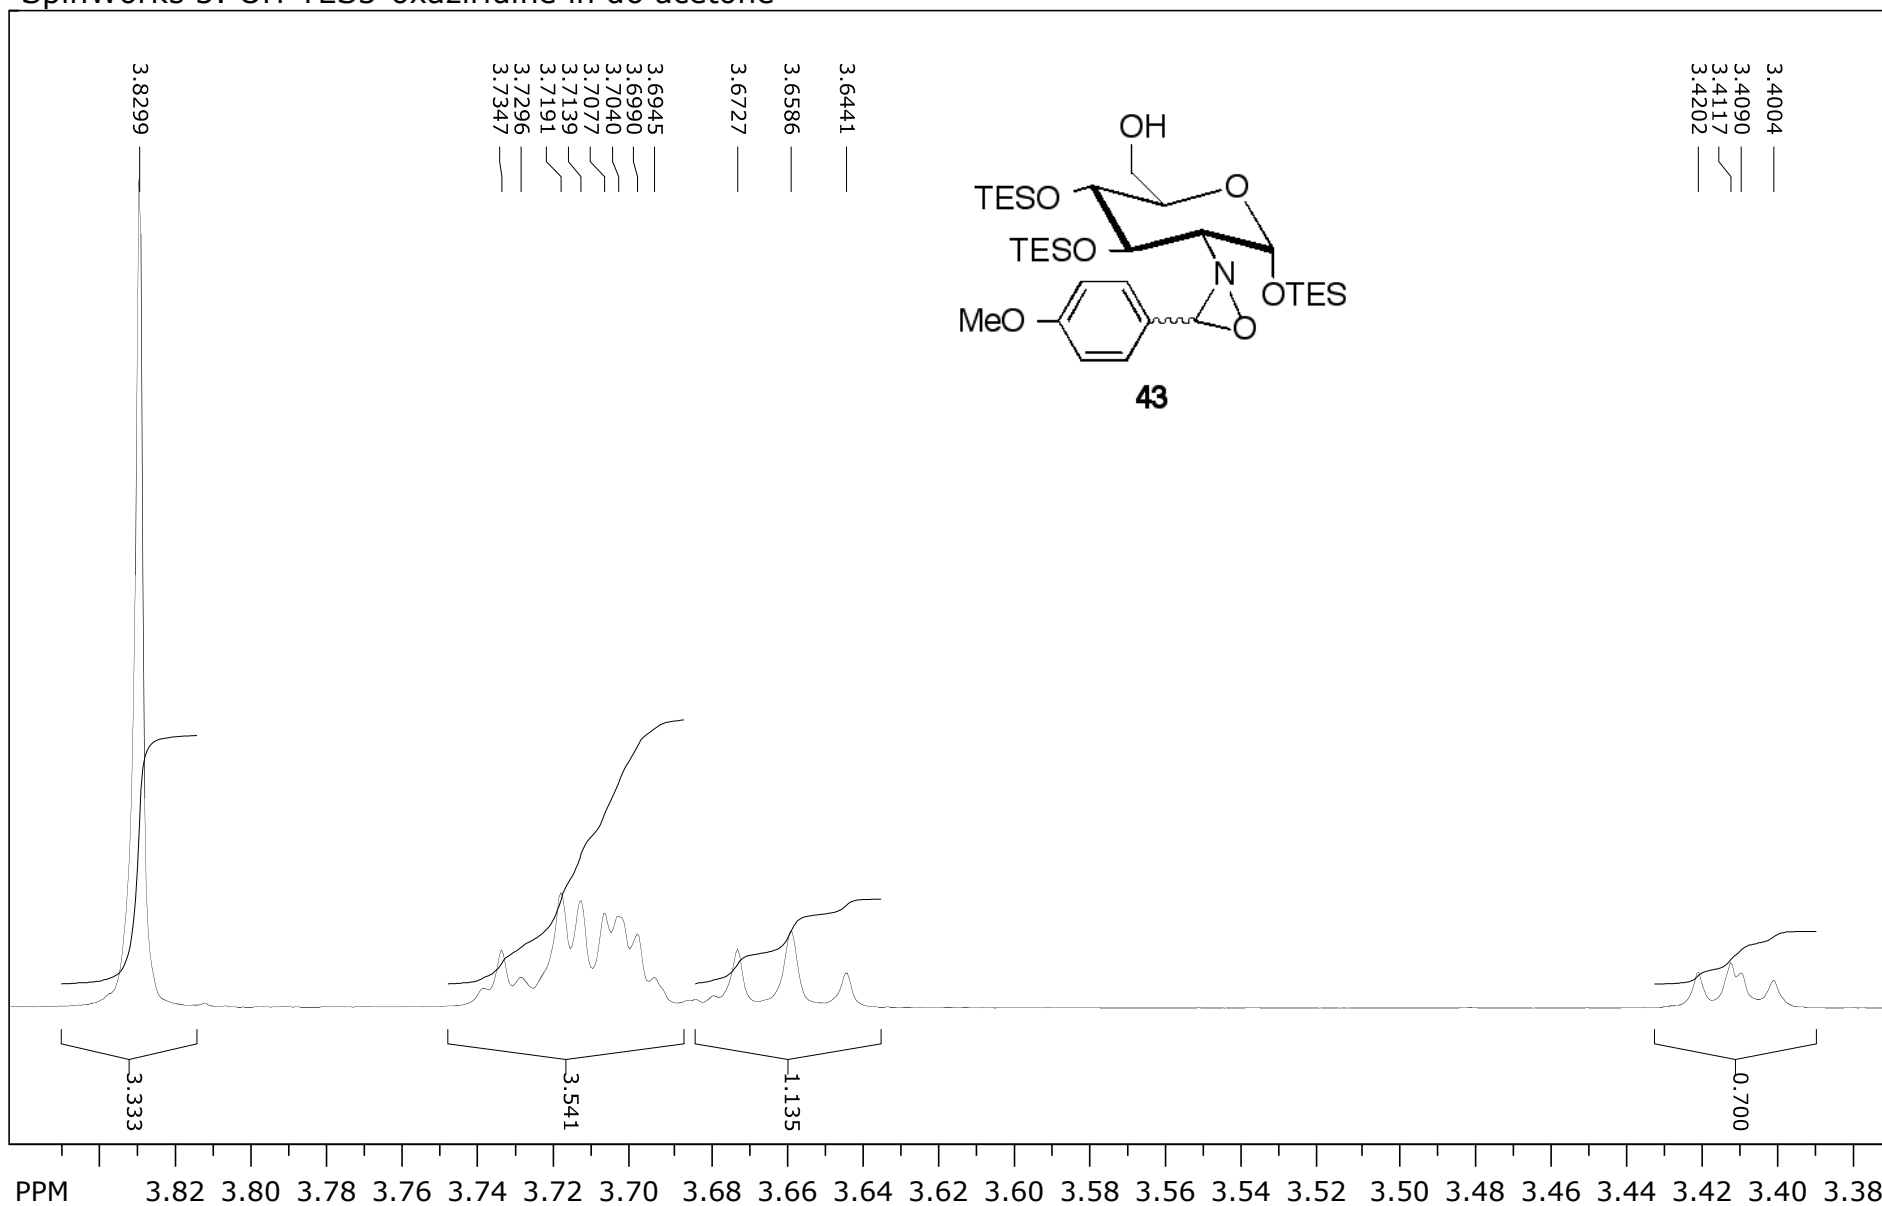

file: ...\Oxaziridines\mainTES3oxazir\1\fid expt: <zgpr>  
 transmitter freq.: 600.552832 MHz  
 time domain size: 32768 points  
 width: 9615.38 Hz = 16.0109 ppm = 0.293438 Hz/pt  
 number of scans: 32

freq. of 0 ppm: 600.550010 MHz  
 processed size: 32768 complex points  
 LB: 0.000 GF: 0.0000  
 Hz/cm: 11.882 ppm/cm: 0.01978

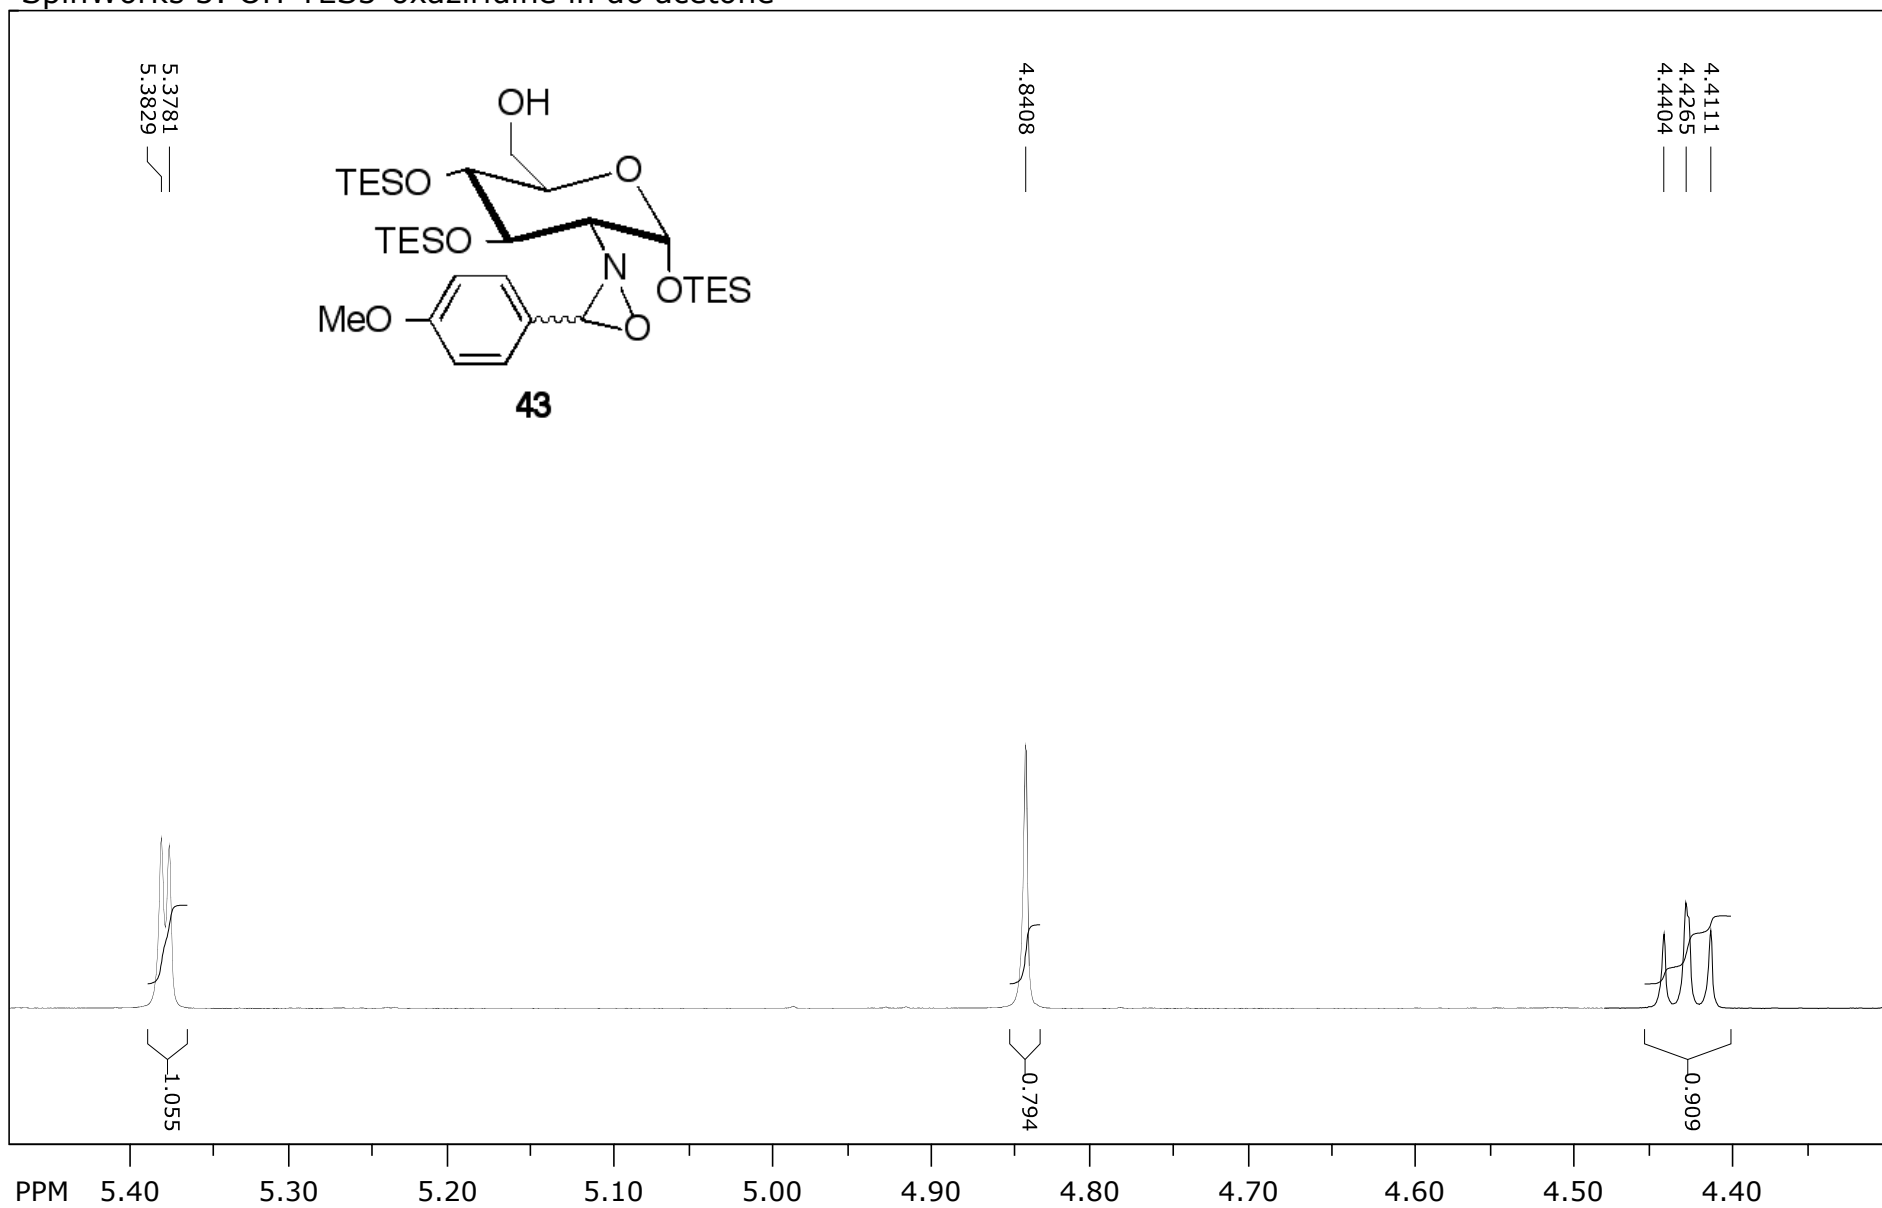

file: ...\Oxaziridines\mainTES3oxazir\1\fid expt: <zgpr>  
transmitter freq.: 600.552832 MHz  
time domain size: 32768 points  
width: 9615.38 Hz = 16.0109 ppm = 0.293438 Hz/pt  
number of scans: 32

freq. of 0 ppm: 600.550010 MHz  
processed size: 32768 complex points  
LB: 0.000 GF: 0.0000  
Hz/cm: 28.365 ppm/cm: 0.04723

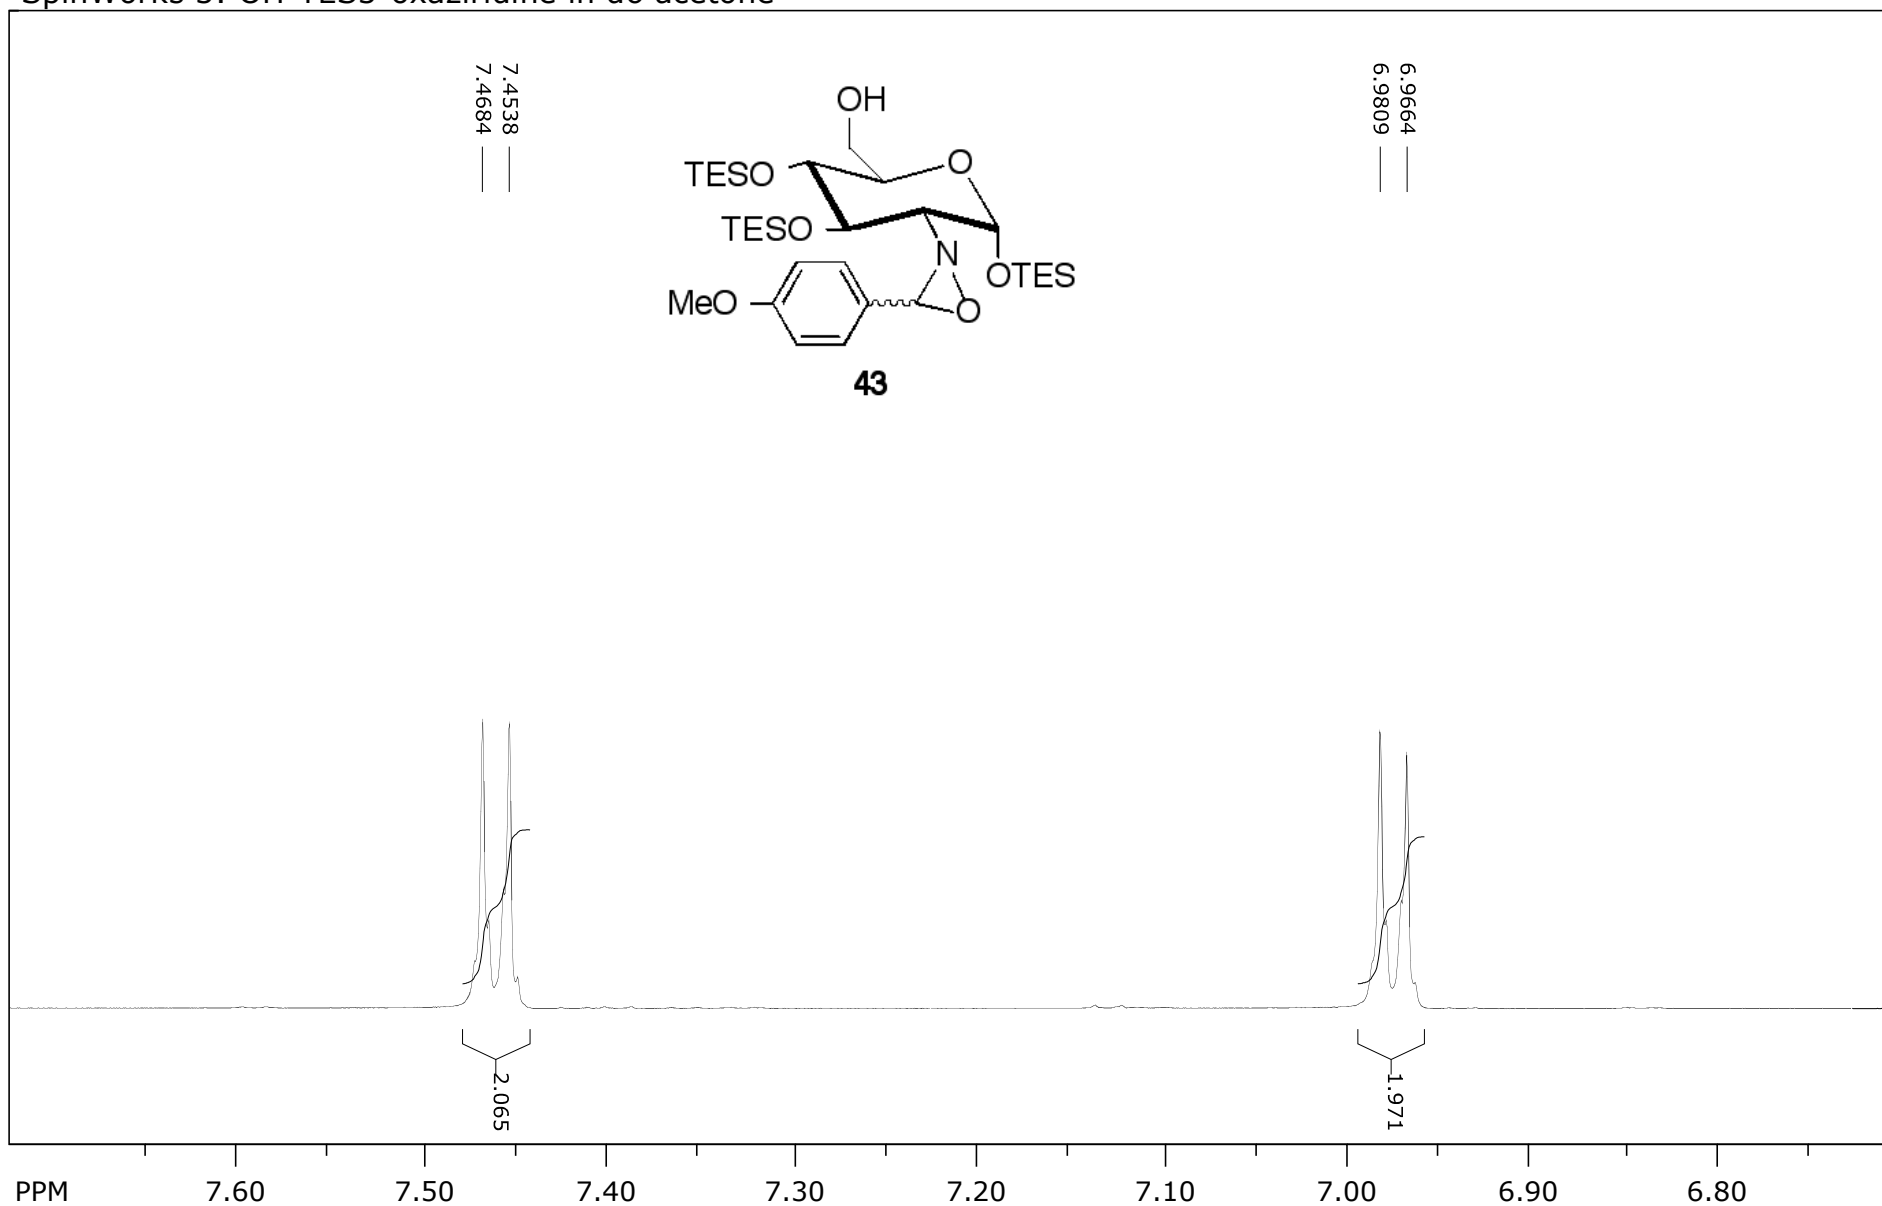

file: ...\Oxaziridines\mainTES3oxazir\1\fid expt: <zgpr>  
transmitter freq.: 600.552832 MHz  
time domain size: 32768 points  
width: 9615.38 Hz = 16.0109 ppm = 0.293438 Hz/pt  
number of scans: 32

freq. of 0 ppm: 600.550010 MHz  
processed size: 32768 complex points  
LB: 0.000 GF: 0.0000  
Hz/cm: 24.554 ppm/cm: 0.04089

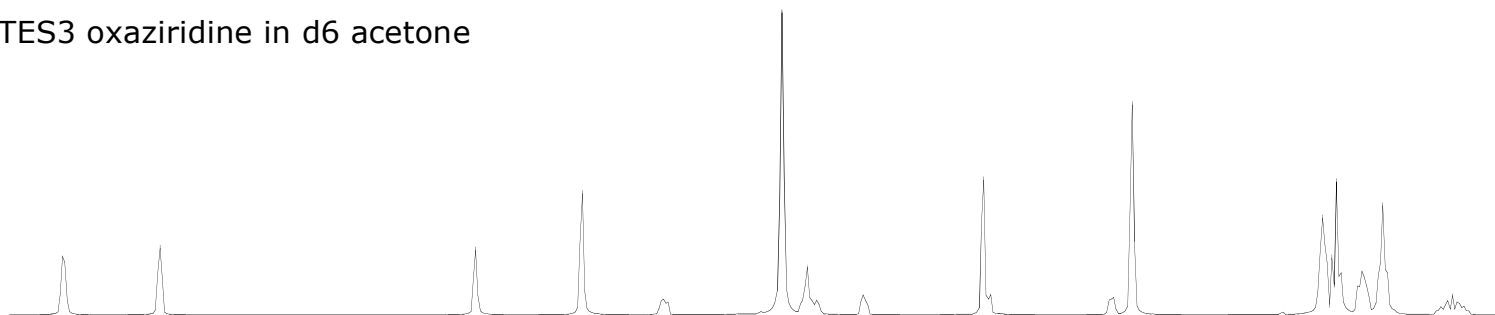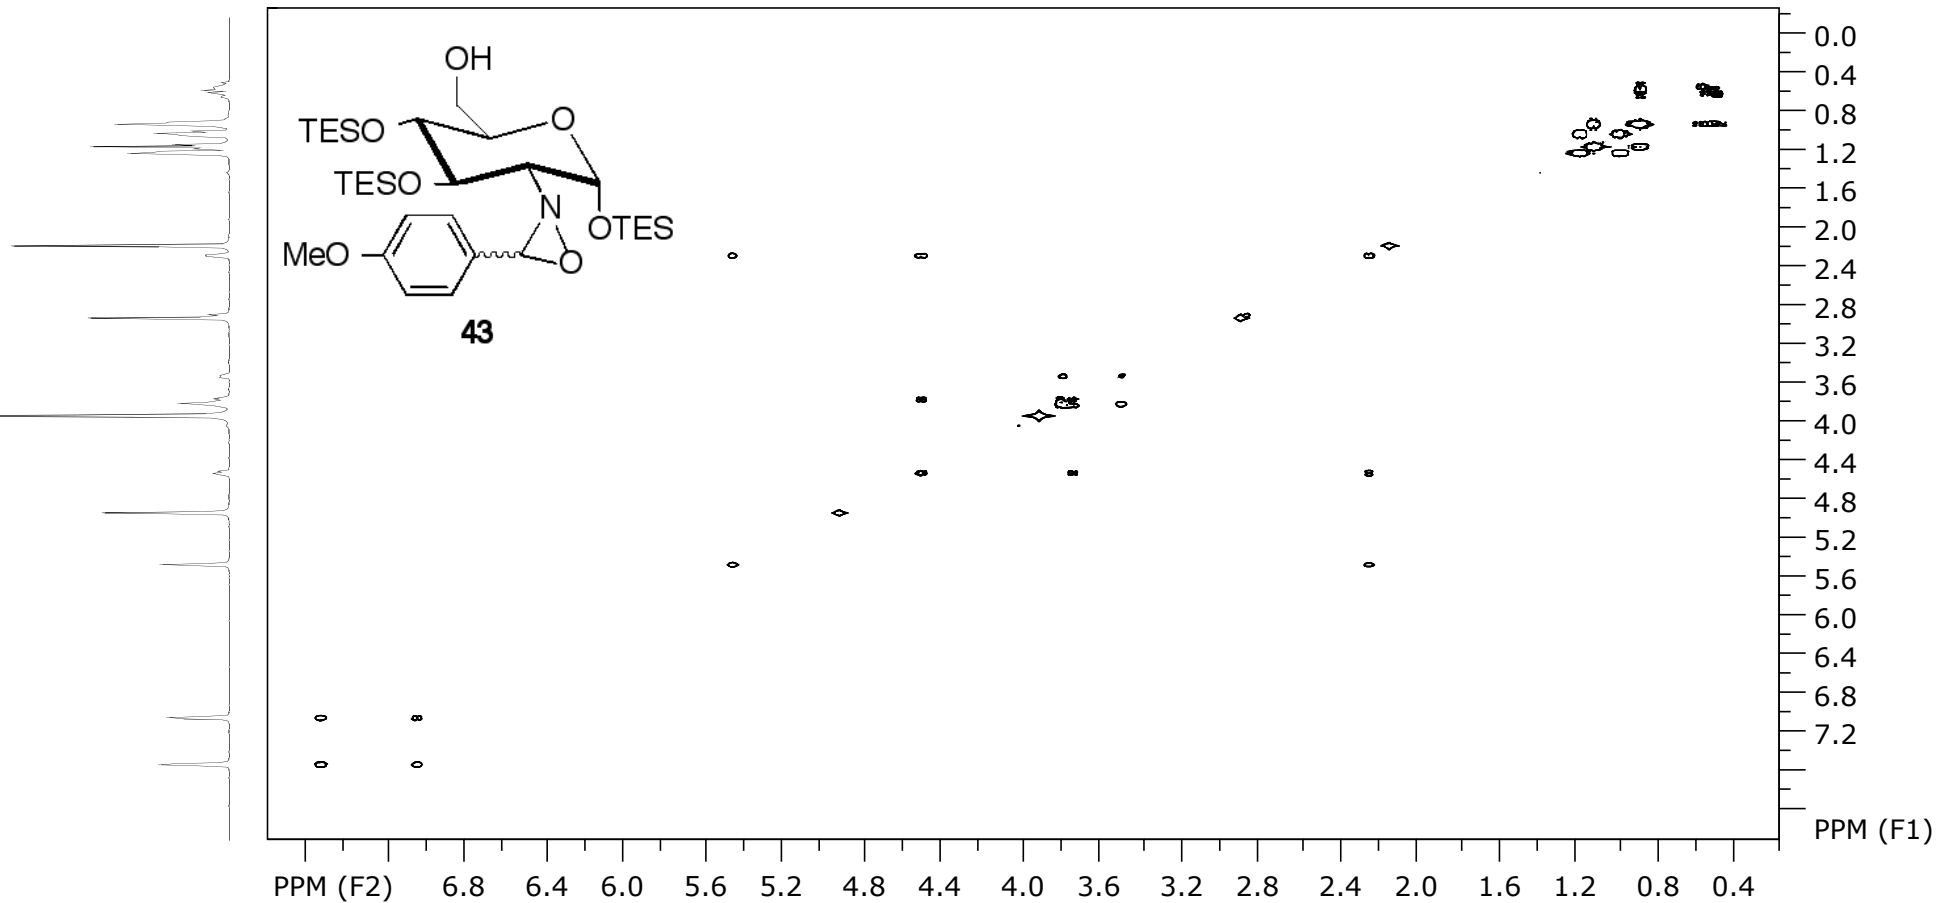

file: ...ziridines\mainTES3oxazirCOSY\1\ser  
 expt: <cosygpqf>  
 transmitter freq: 600.552832 MHz  
 time domain size: 2048 by 1024 points  
 width (F2): 7211.54 Hz = 12.0082 ppm = 3.5213 Hz/pt  
 number of scans: 4

F2: freq. of 0 ppm: 600.5499623 MHz  
 processed size: 1024 complex points  
 window function: Sine  
 shift: 0.0 degrees  
 Hz/cm: 228.262 ppm/cm: 0.38009

F1: freq. of 0 ppm: 600.5499623 MHz  
 processed size: 1024 complex points  
 window function: Sine  
 shift: 0.0 degrees  
 Hz/cm: 468.241 ppm/cm: 0.77968



|               |                      |             |                      |                 |              |                        |                      |
|---------------|----------------------|-------------|----------------------|-----------------|--------------|------------------------|----------------------|
| Sample Name   | Jeff 47              | Position    | Vial 47              | Instrument Name | Instrument 1 | User Name              | DYL                  |
| Inj Vol       | 1                    | InjPosition |                      | SampleType      | Unknown      | IRM Calibration Status | Success              |
| Data Filename | Direct_Vial 47_Jeff. | ACQ Method  | Direct_small mol_Jef | Comment         |              | Acquired Time          | 8/17/2012 2:15:15 PM |

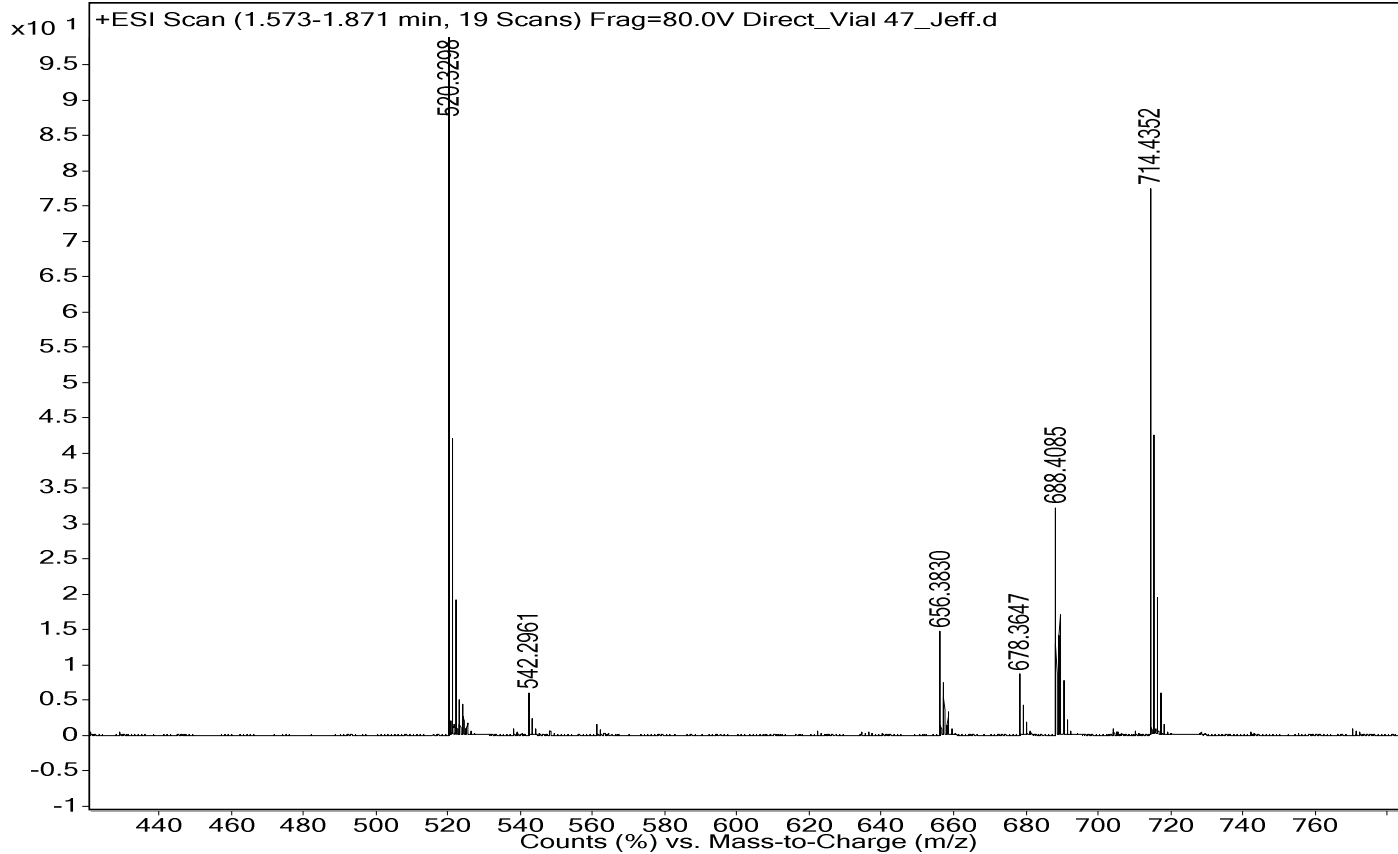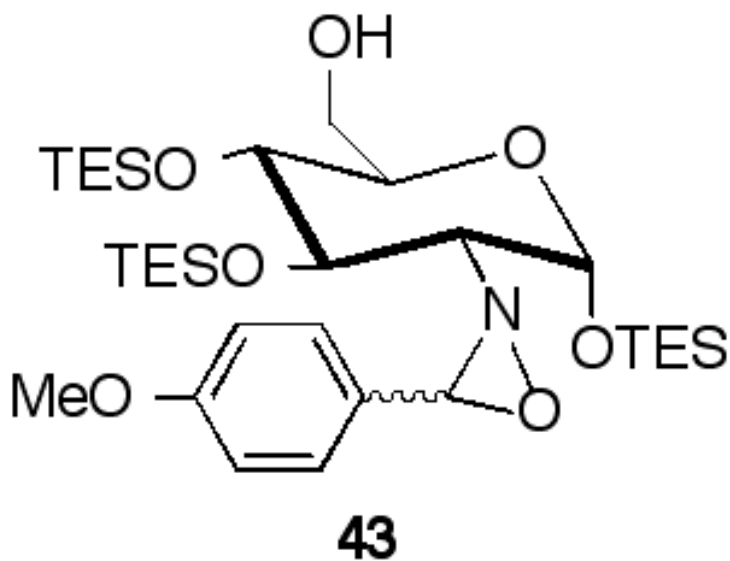

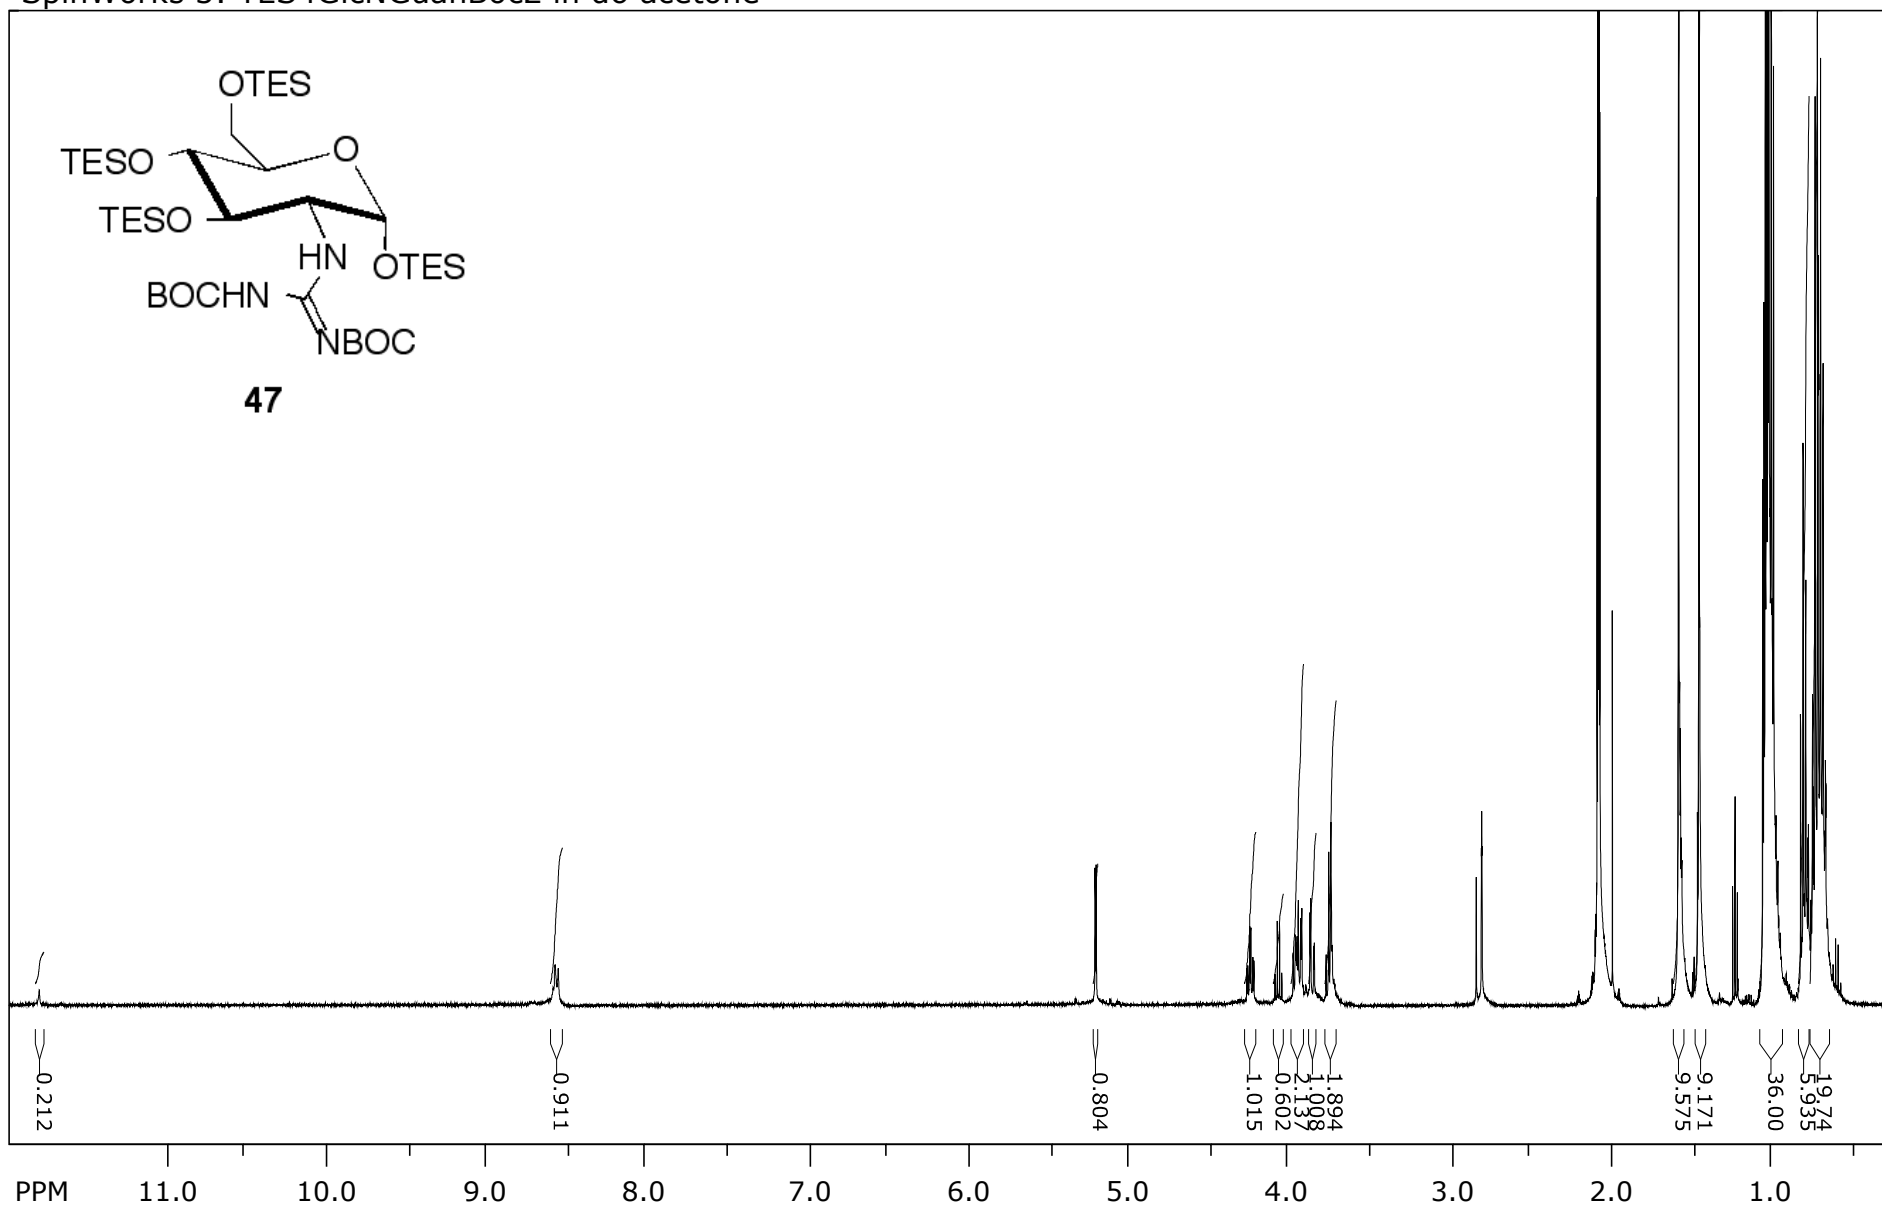

file: ...akony\nmr\TES4GB2\_10\_09\_main\1\fid expt: <zg>  
transmitter freq.: 500.049088 MHz  
time domain size: 65536 points  
width: 10330.58 Hz = 20.6591 ppm = 0.157632 Hz/pt  
number of scans: 164

freq. of 0 ppm: 500.046007 MHz  
processed size: 32768 complex points  
LB: 0.000 GF: 0.0000  
Hz/cm: 235.380 ppm/cm: 0.47071

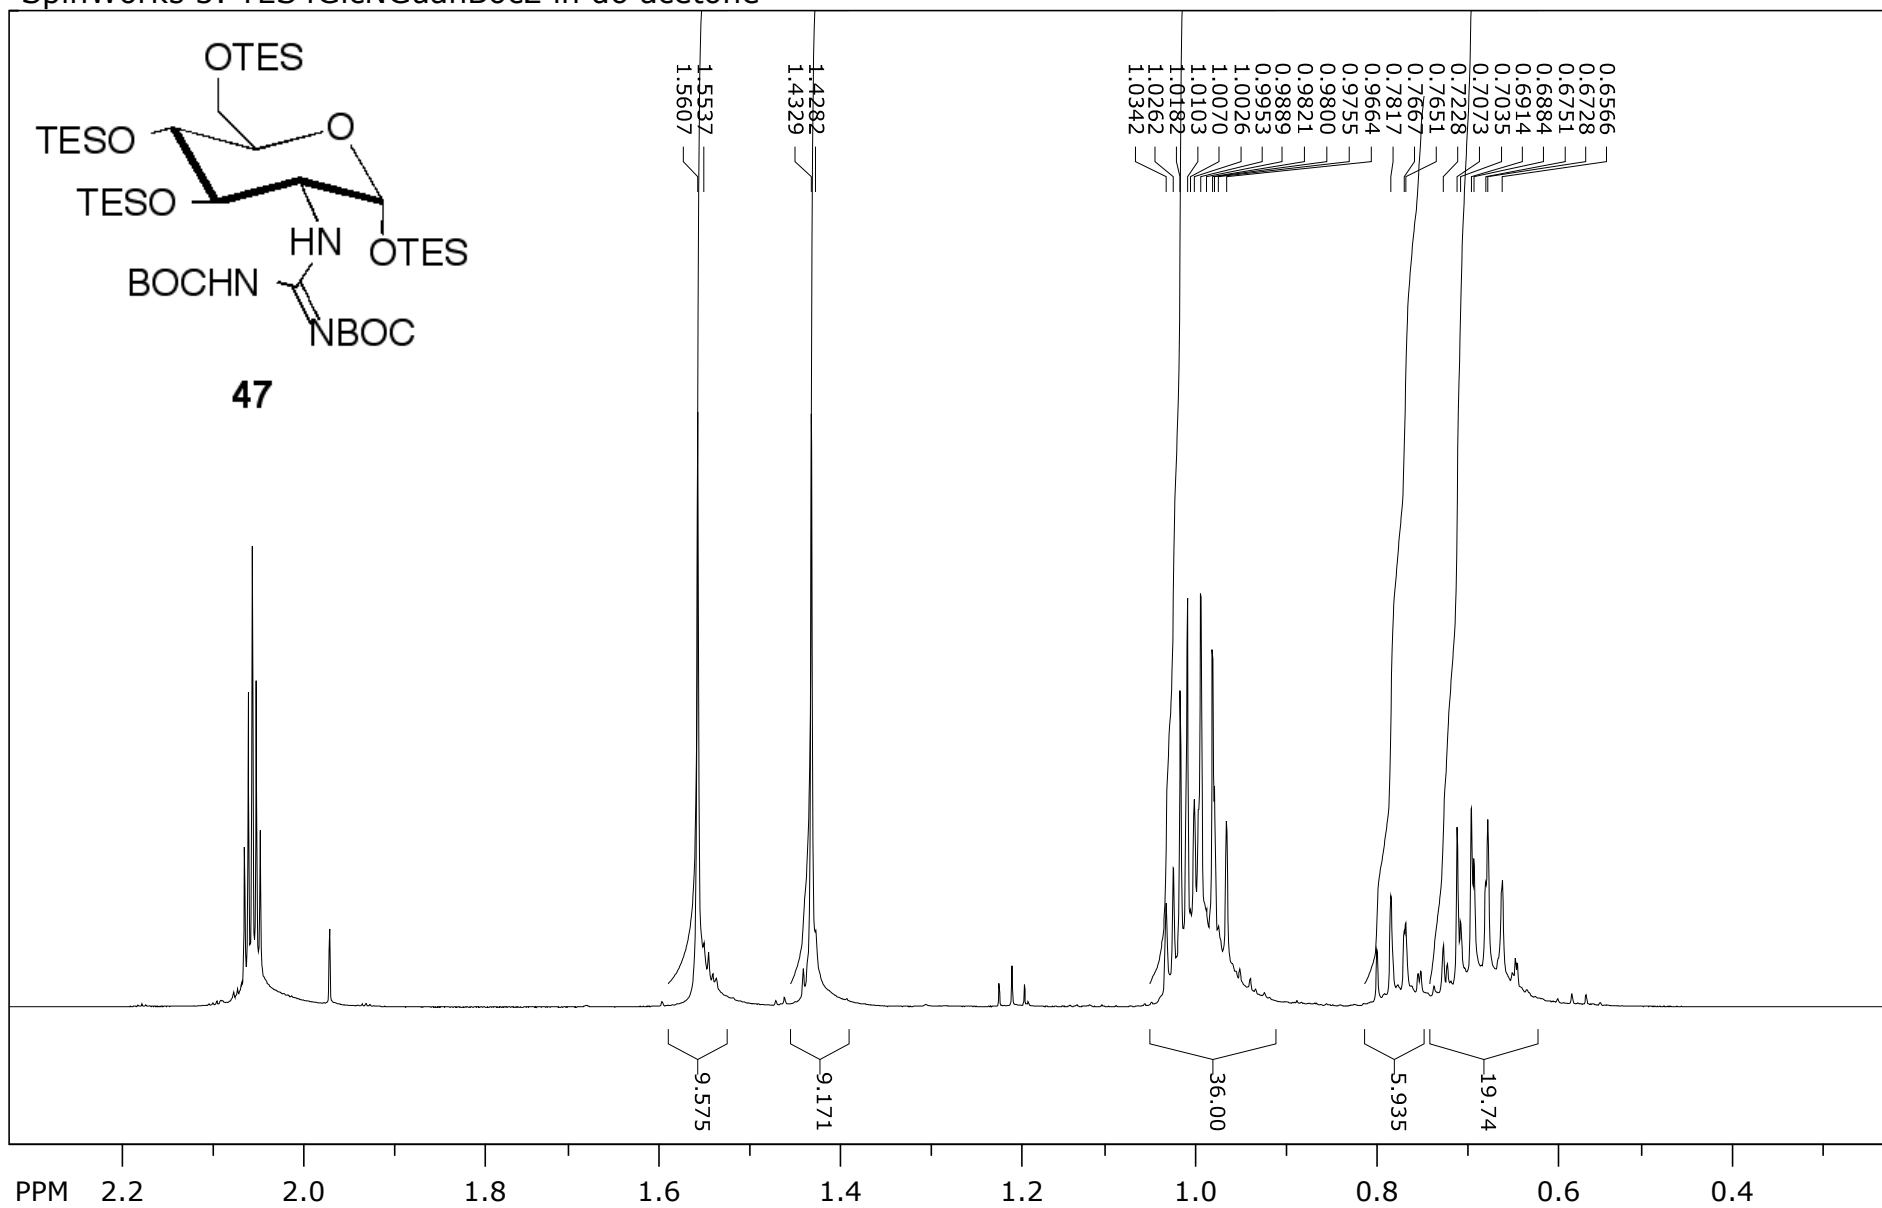

file: ...akony\nmr\TES4GB2\_10\_09\_main\1\fid expt: <zg>  
 transmitter freq.: 500.049088 MHz  
 time domain size: 65536 points  
 width: 10330.58 Hz = 20.6591 ppm = 0.157632 Hz/pt  
 number of scans: 164

freq. of 0 ppm: 500.046007 MHz  
 processed size: 32768 complex points  
 LB: 0.000 GF: 0.0000  
 Hz/cm: 42.300 ppm/cm: 0.08459



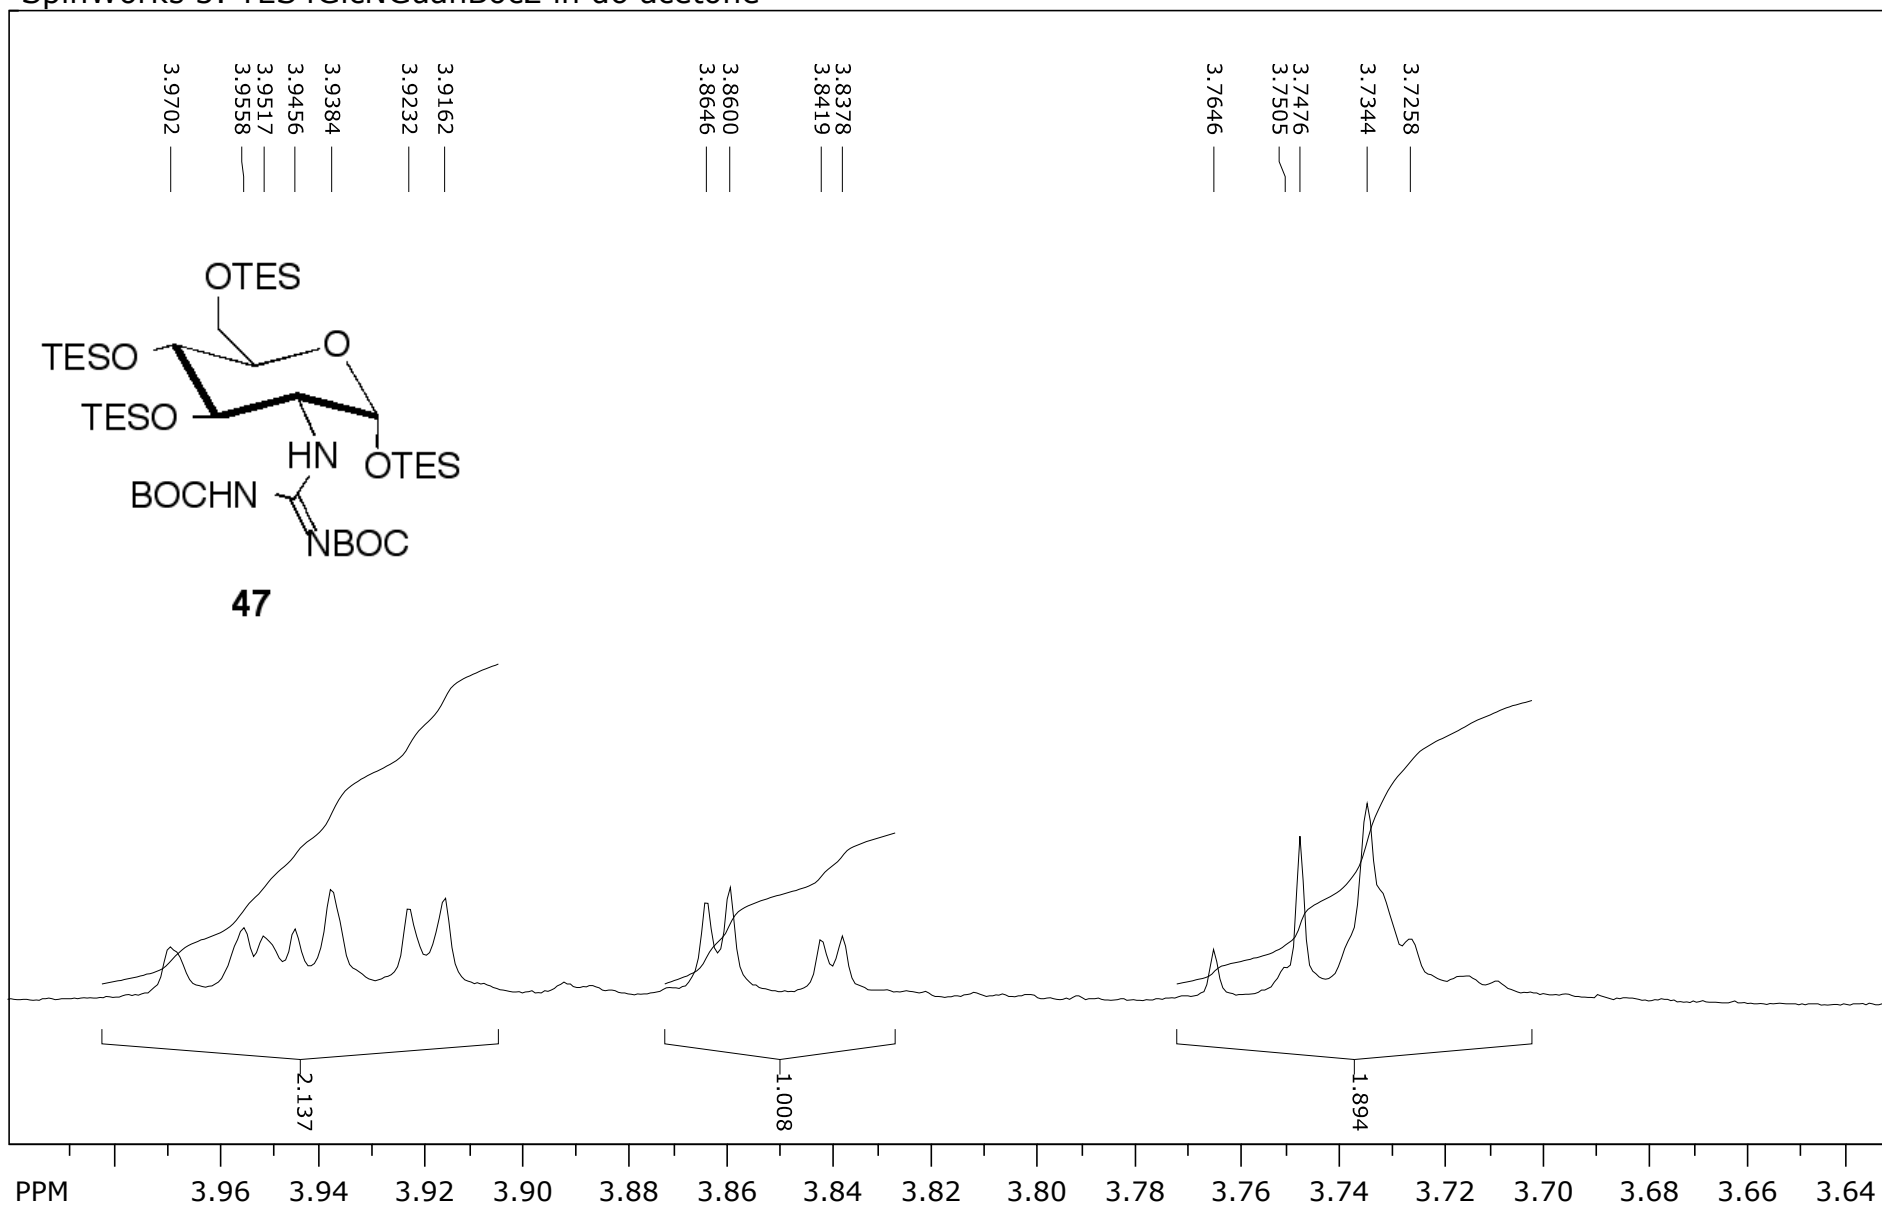

file: ...akony\nmr\TES4GB2\_10\_09\_main\1\fid exp: <zg>  
transmitter freq.: 500.049088 MHz  
time domain size: 65536 points  
width: 10330.58 Hz = 20.6591 ppm = 0.157632 Hz/pt  
number of scans: 164

freq. of 0 ppm: 500.046007 MHz  
processed size: 32768 complex points  
LB: 0.000 GF: 0.0000  
Hz/cm: 7.419 ppm/cm: 0.01484

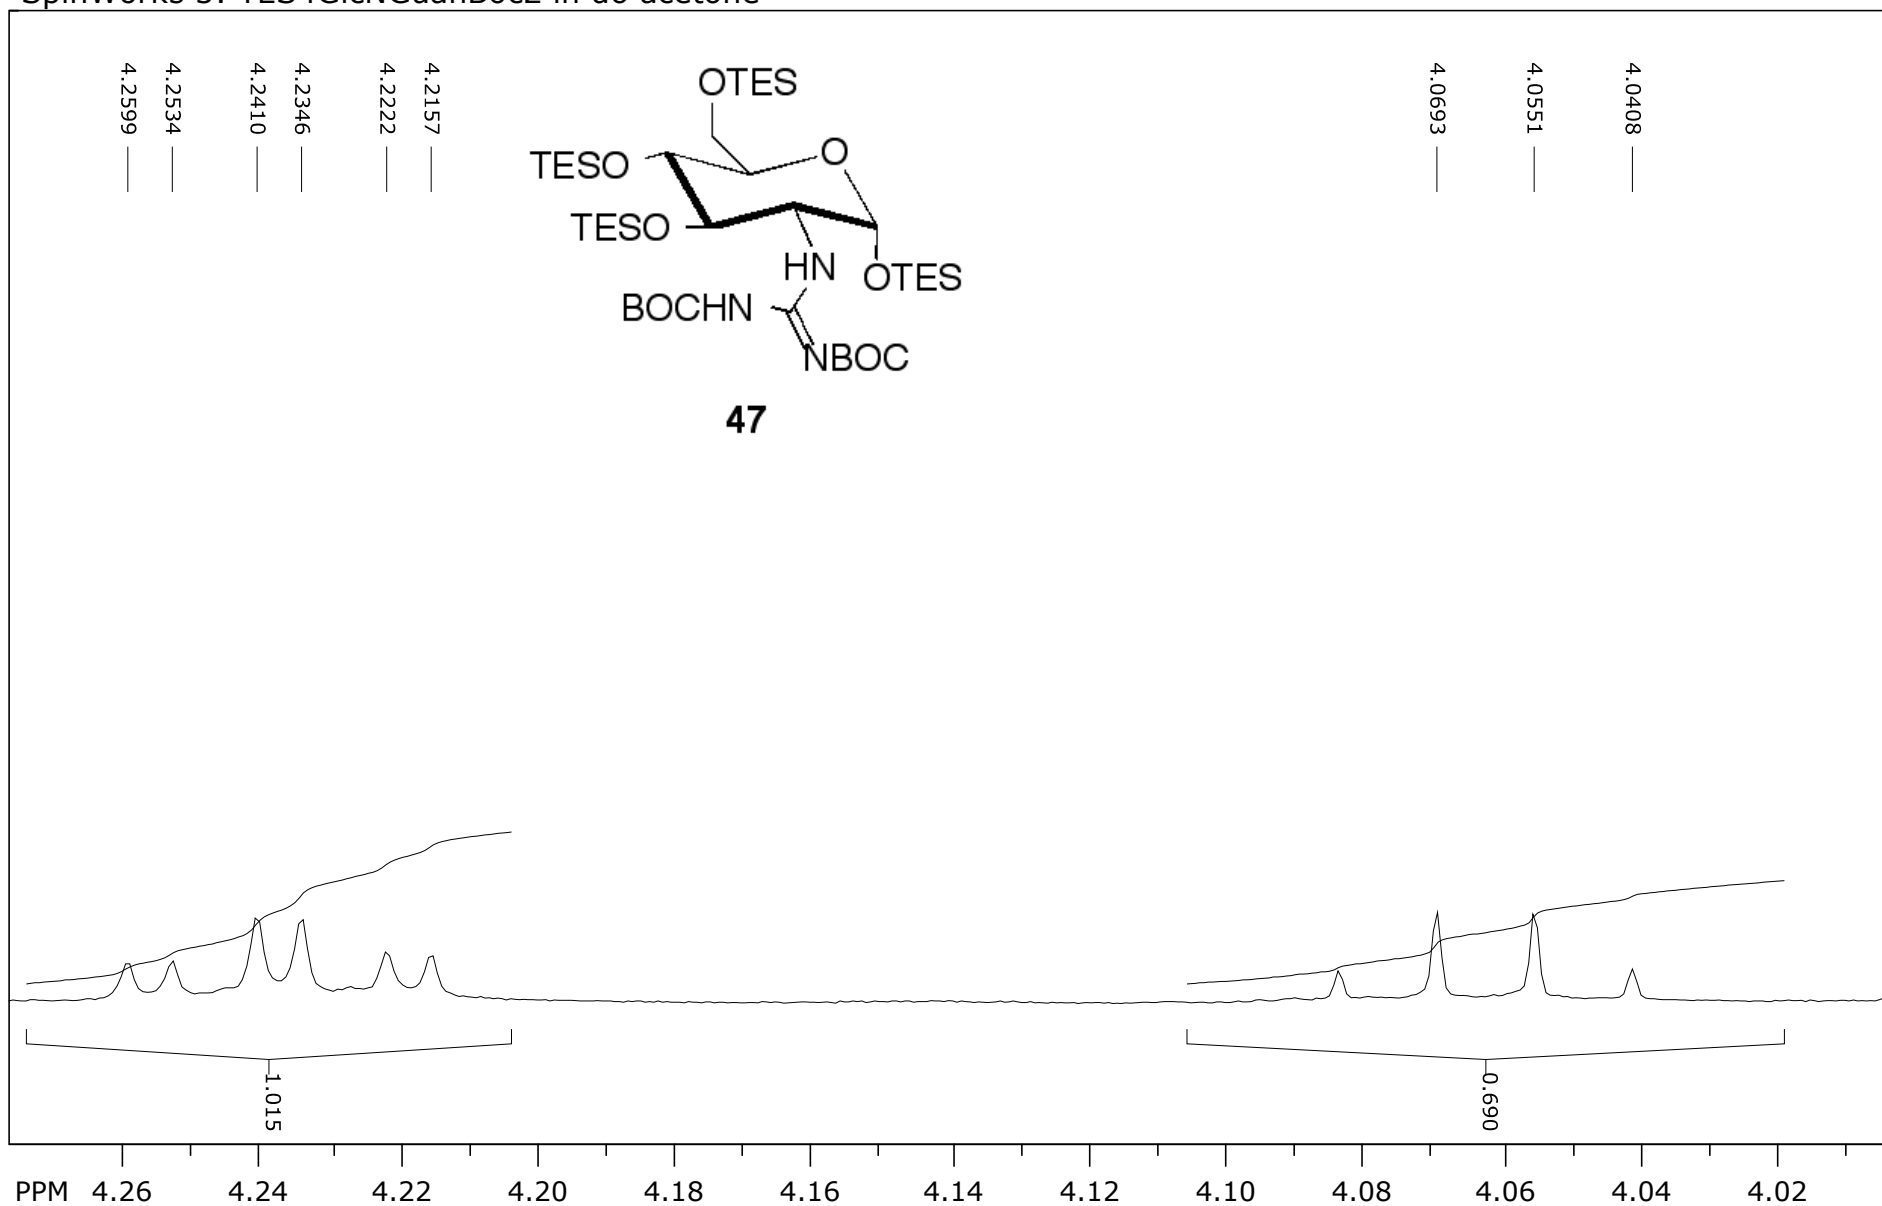

file: ...akony\nmr\TES4GB2\_10\_09\_main\1\fid expt: <zg>  
transmitter freq.: 500.049088 MHz  
time domain size: 65536 points  
width: 10330.58 Hz = 20.6591 ppm = 0.157632 Hz/pt  
number of scans: 164

freq. of 0 ppm: 500.046007 MHz  
processed size: 32768 complex points  
LB: 0.000 GF: 0.0000  
Hz/cm: 5.481 ppm/cm: 0.01096

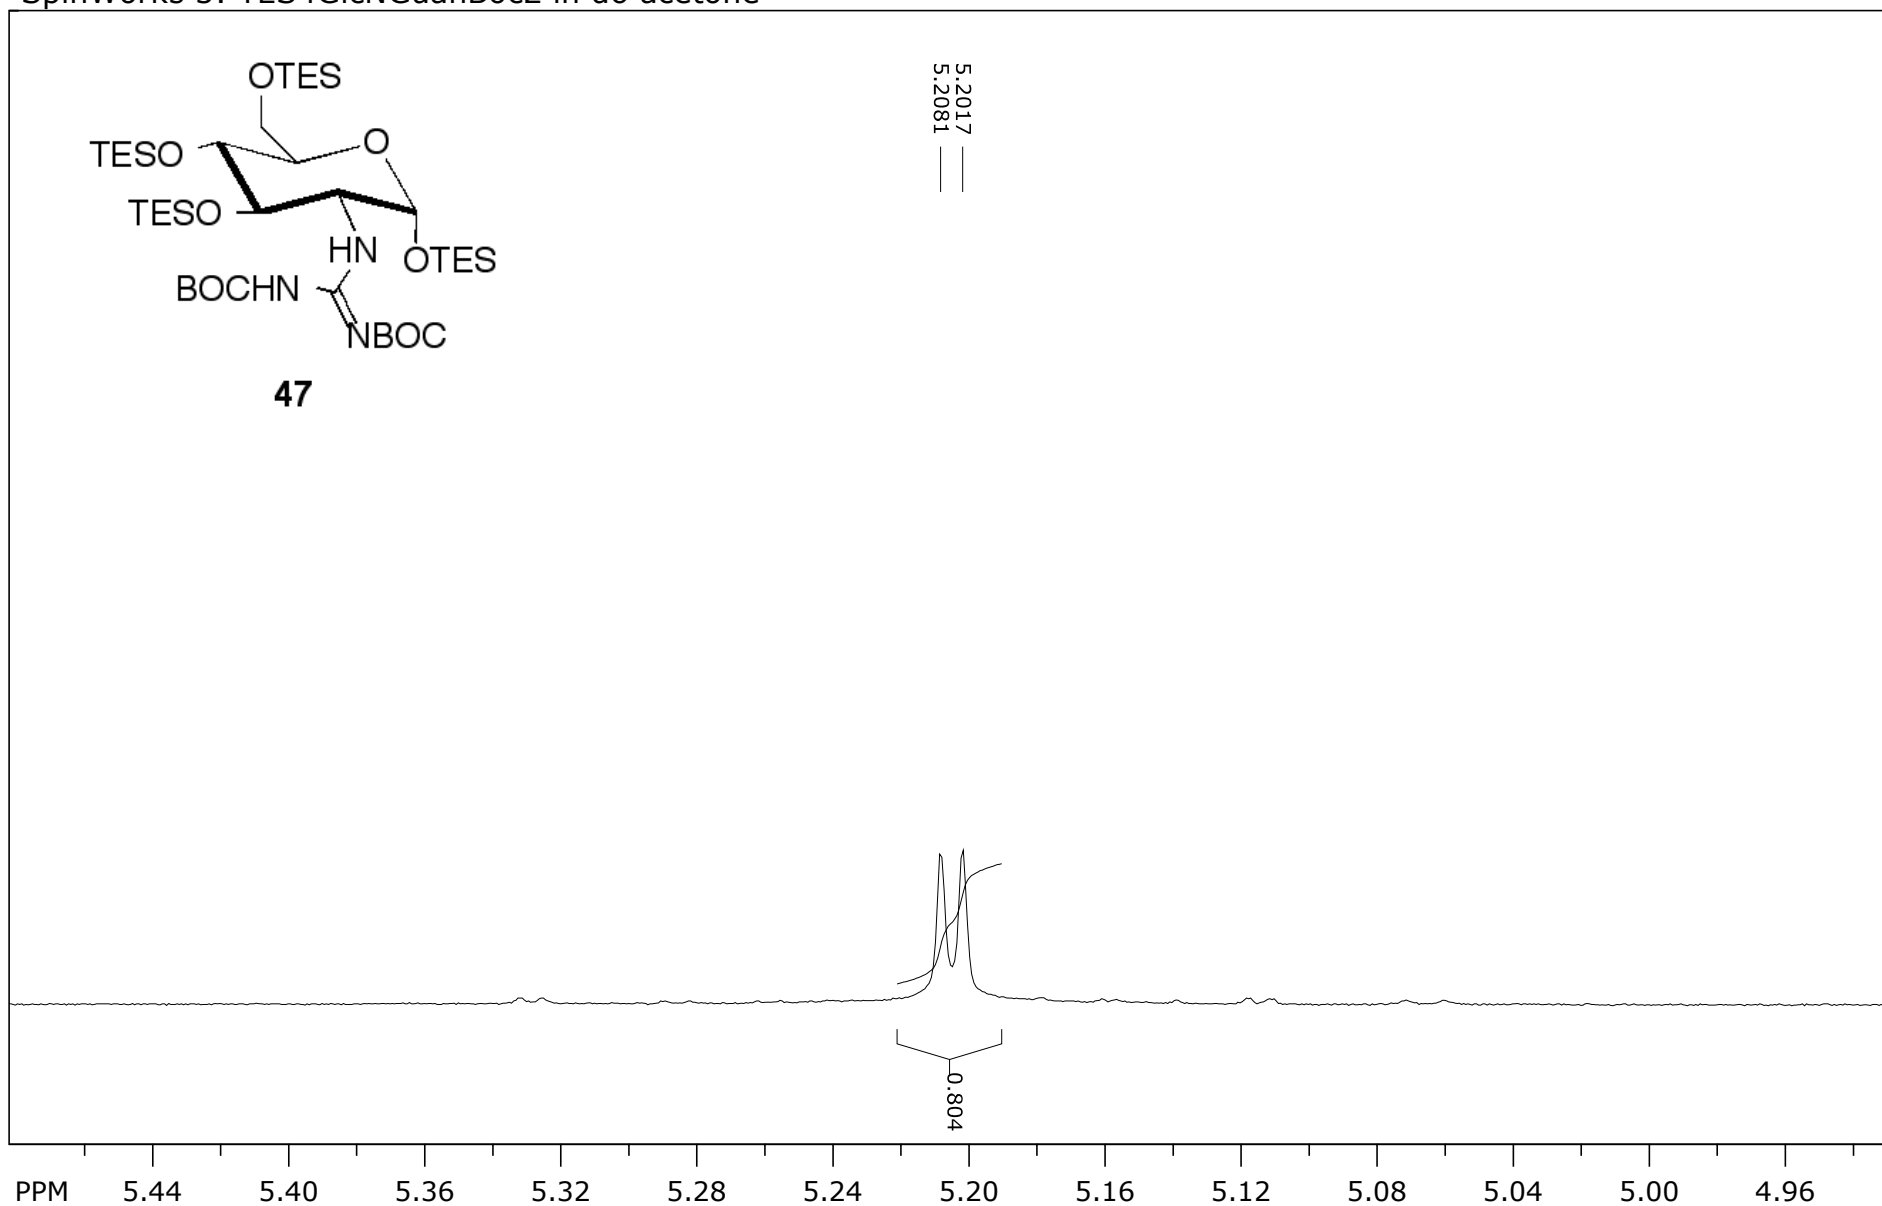

file: ...akony\nmr\TES4GB2\_10\_09\_main\1\fid exp: <zg>  
transmitter freq.: 500.049088 MHz  
time domain size: 65536 points  
width: 10330.58 Hz = 20.6591 ppm = 0.157632 Hz/pt  
number of scans: 164

freq. of 0 ppm: 500.046007 MHz  
processed size: 32768 complex points  
LB: 0.000 GF: 0.0000  
Hz/cm: 11.144 ppm/cm: 0.02229

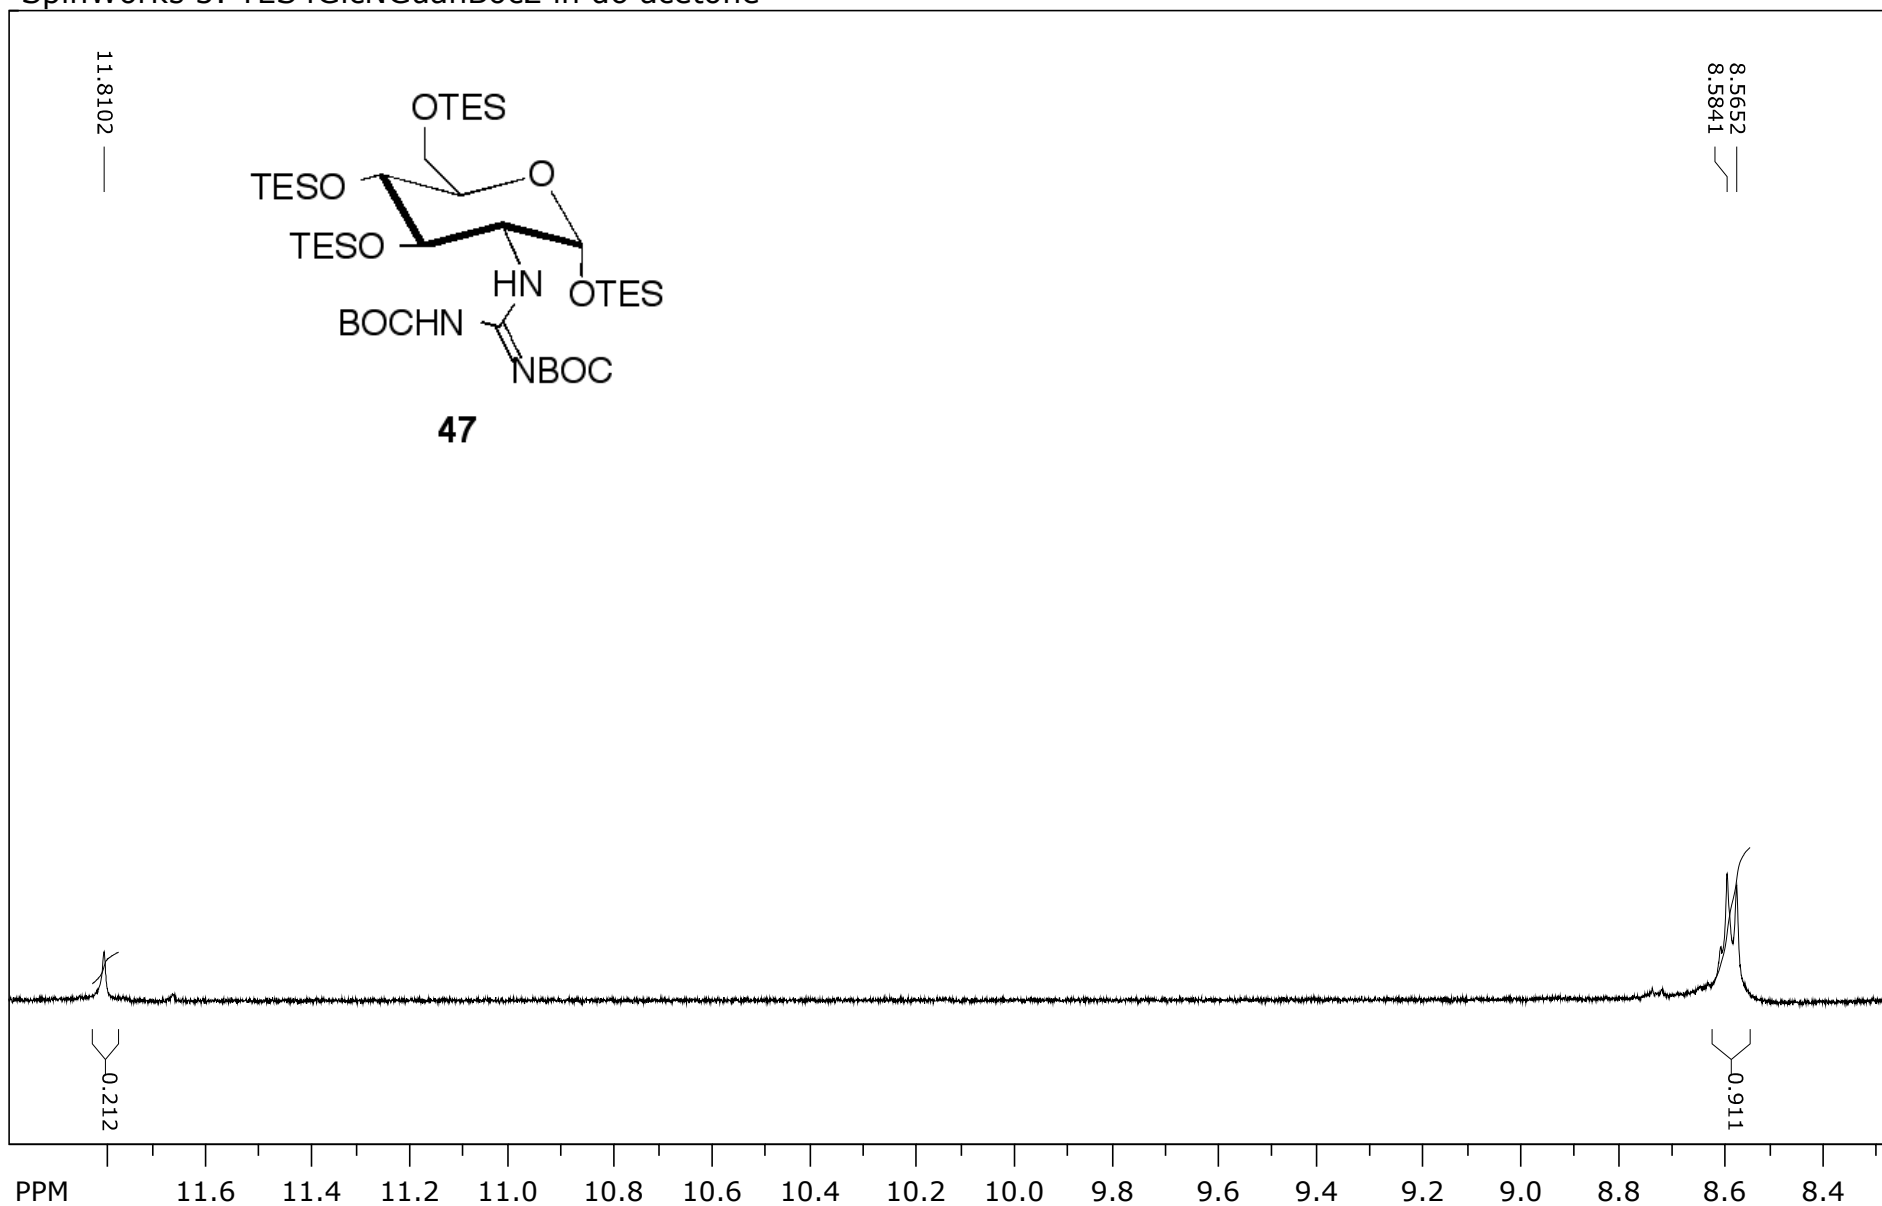

file: ...akony\nmr\TES4GB2\_10\_09\_main\1\fid expt: <zg>  
transmitter freq.: 500.049088 MHz  
time domain size: 65536 points  
width: 10330.58 Hz = 20.6591 ppm = 0.157632 Hz/pt  
number of scans: 164

freq. of 0 ppm: 500.046007 MHz  
processed size: 32768 complex points  
LB: 0.000 GF: 0.0000  
Hz/cm: 74.821 ppm/cm: 0.14963

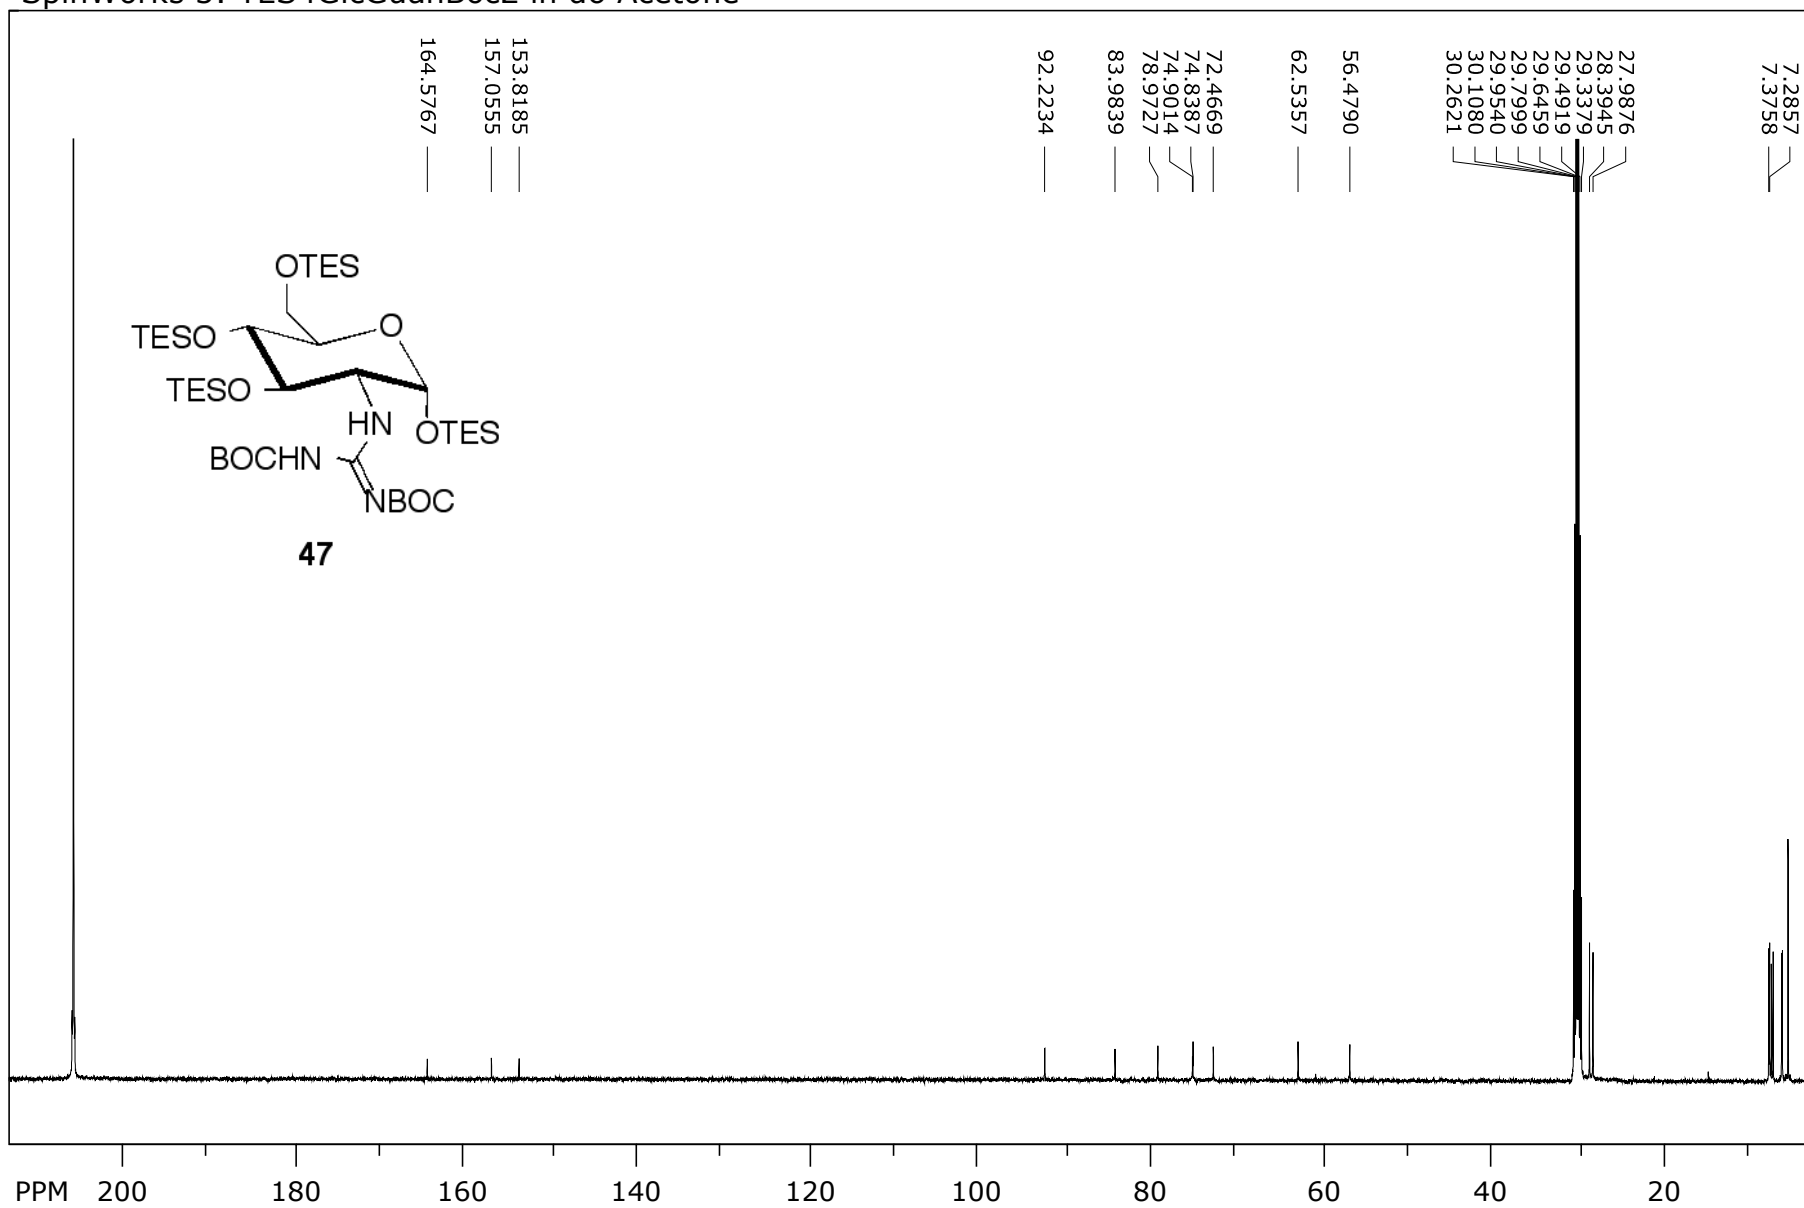

file: ...Data\jjp 11\_05\TES4GB2 11\_05\2\fid exp: <zgpg30>  
transmitter freq.: 125.749582 MHz  
time domain size: 65536 points  
width: 30303.03 Hz = 240.9792 ppm = 0.462388 Hz/pt  
number of scans: 3600

freq. of 0 ppm: 125.736559 MHz  
processed size: 32768 complex points  
LB: 2.500 GF: 0.0000  
Hz/cm: 1109.054 ppm/cm: 8.81955

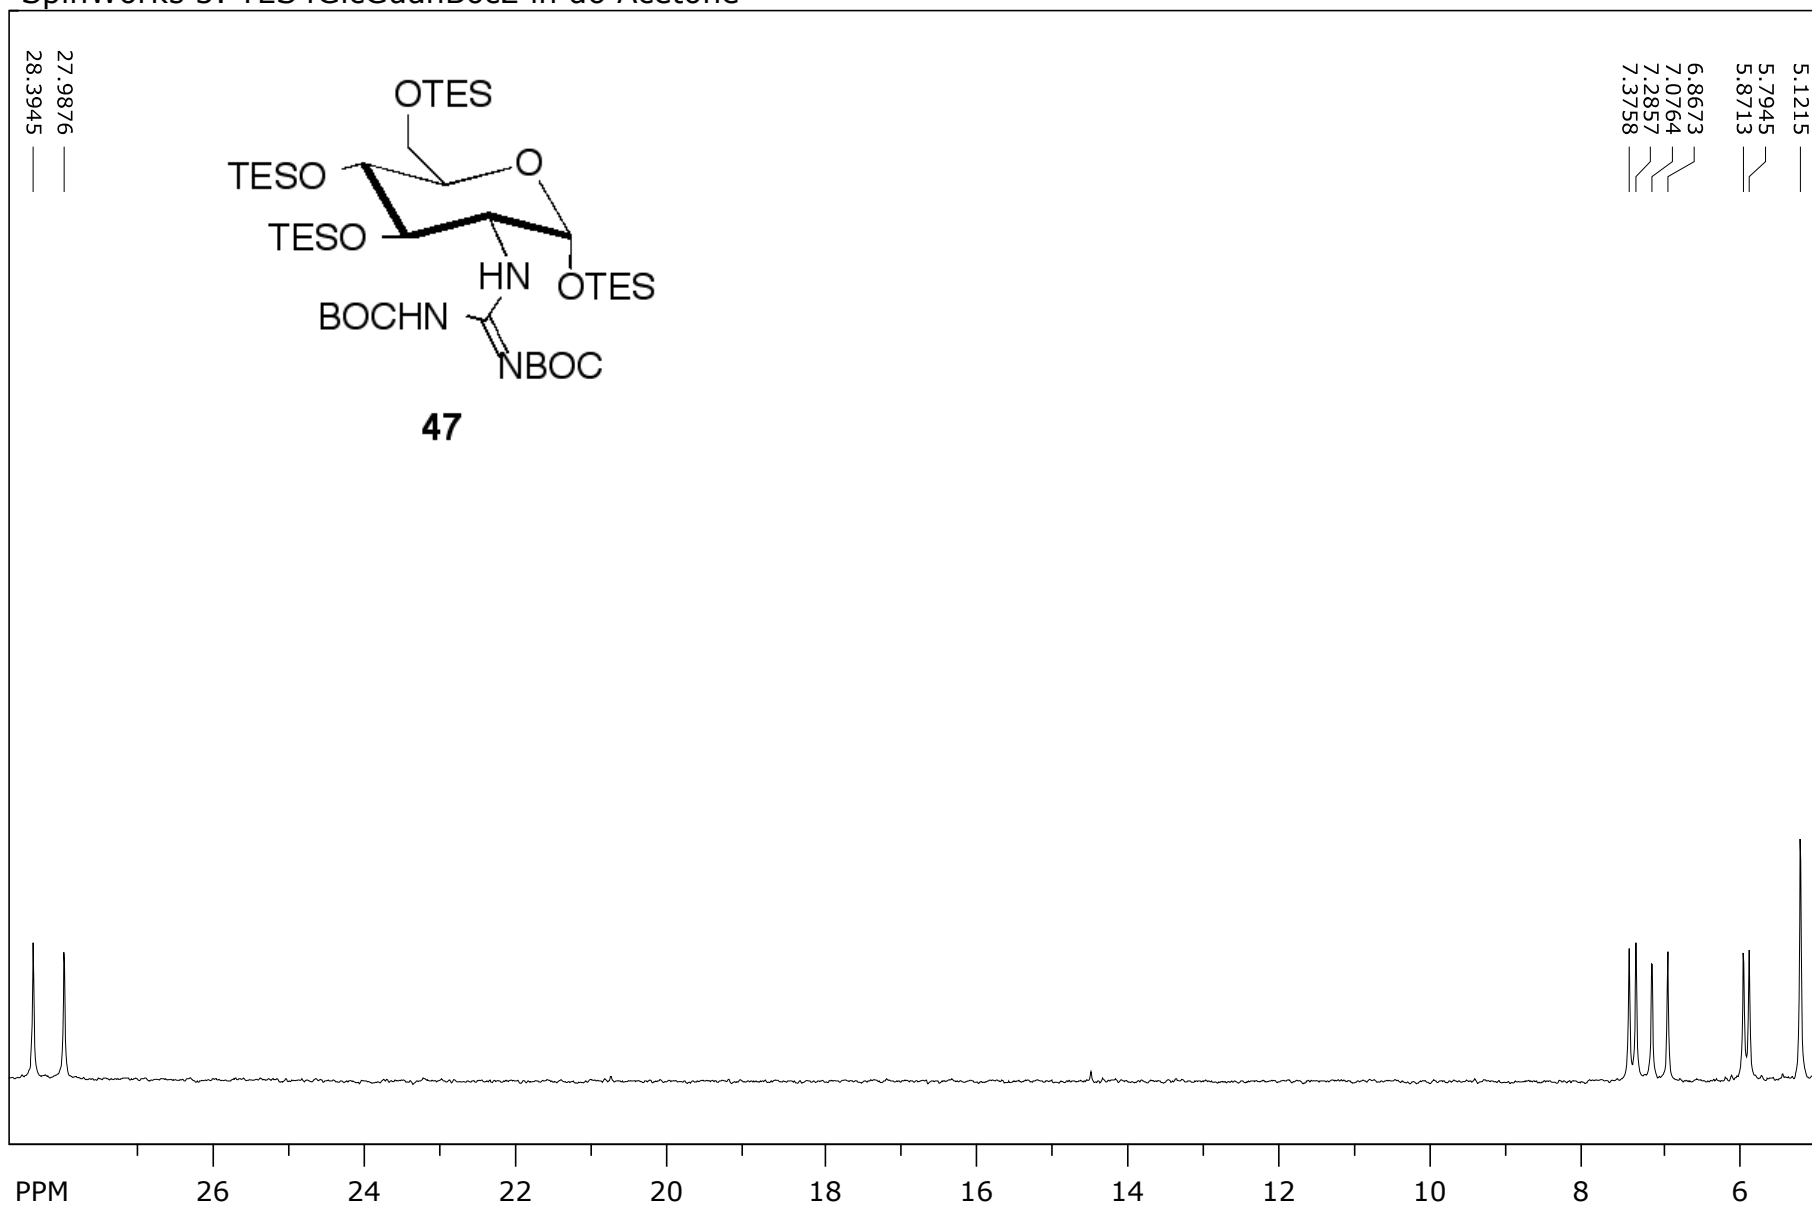

file: ...Data\jjp 11\_05\TES4GB2 11\_05\2\fid exp: <zgpg30>  
transmitter freq.: 125.749582 MHz  
time domain size: 65536 points  
width: 30303.03 Hz = 240.9792 ppm = 0.462388 Hz/pt  
number of scans: 3600

freq. of 0 ppm: 125.736559 MHz  
processed size: 32768 complex points  
LB: 2.500 GF: 0.0000  
Hz/cm: 124.645 ppm/cm: 0.99122

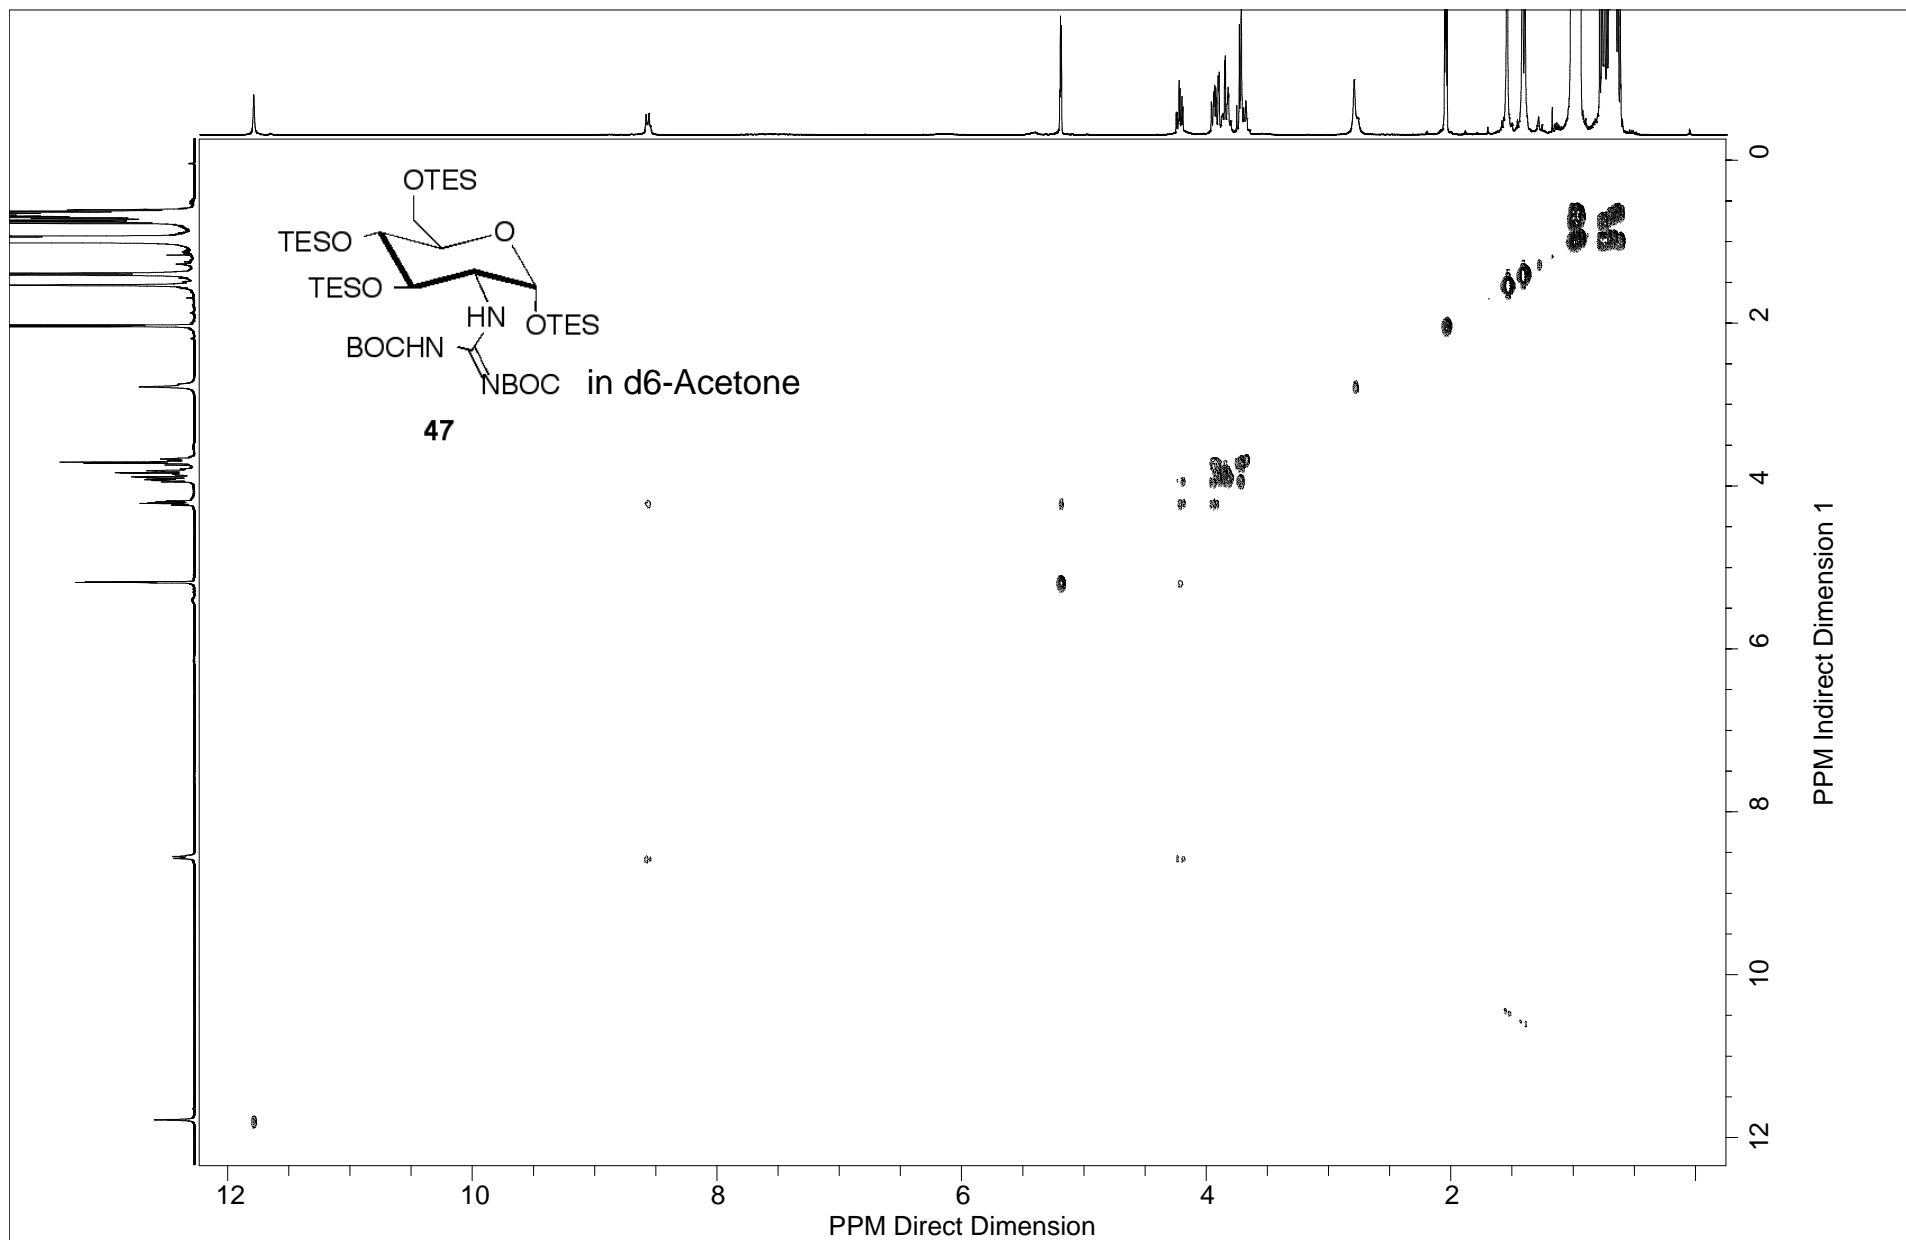

TES4GB2\_in\_CO(CD3)2 (32993)

USER: JR -- DATE: Sep 21, 2009 17:51:49

F1: 399.785 F2: 399.785 SW1: 5597 SW2: 5597 OF1: 2398.7 OF2: 2398.7 PTS1d: 1024 , 1024 PTS2d: 256 , 512

EX: cosy\_pfg.ex2

PW: 13.9us, 90deg

PD: 2.0 sec

NA: 2

LB: 0.0

Nuts - \$\$fh090921\_COSY-1.jdf

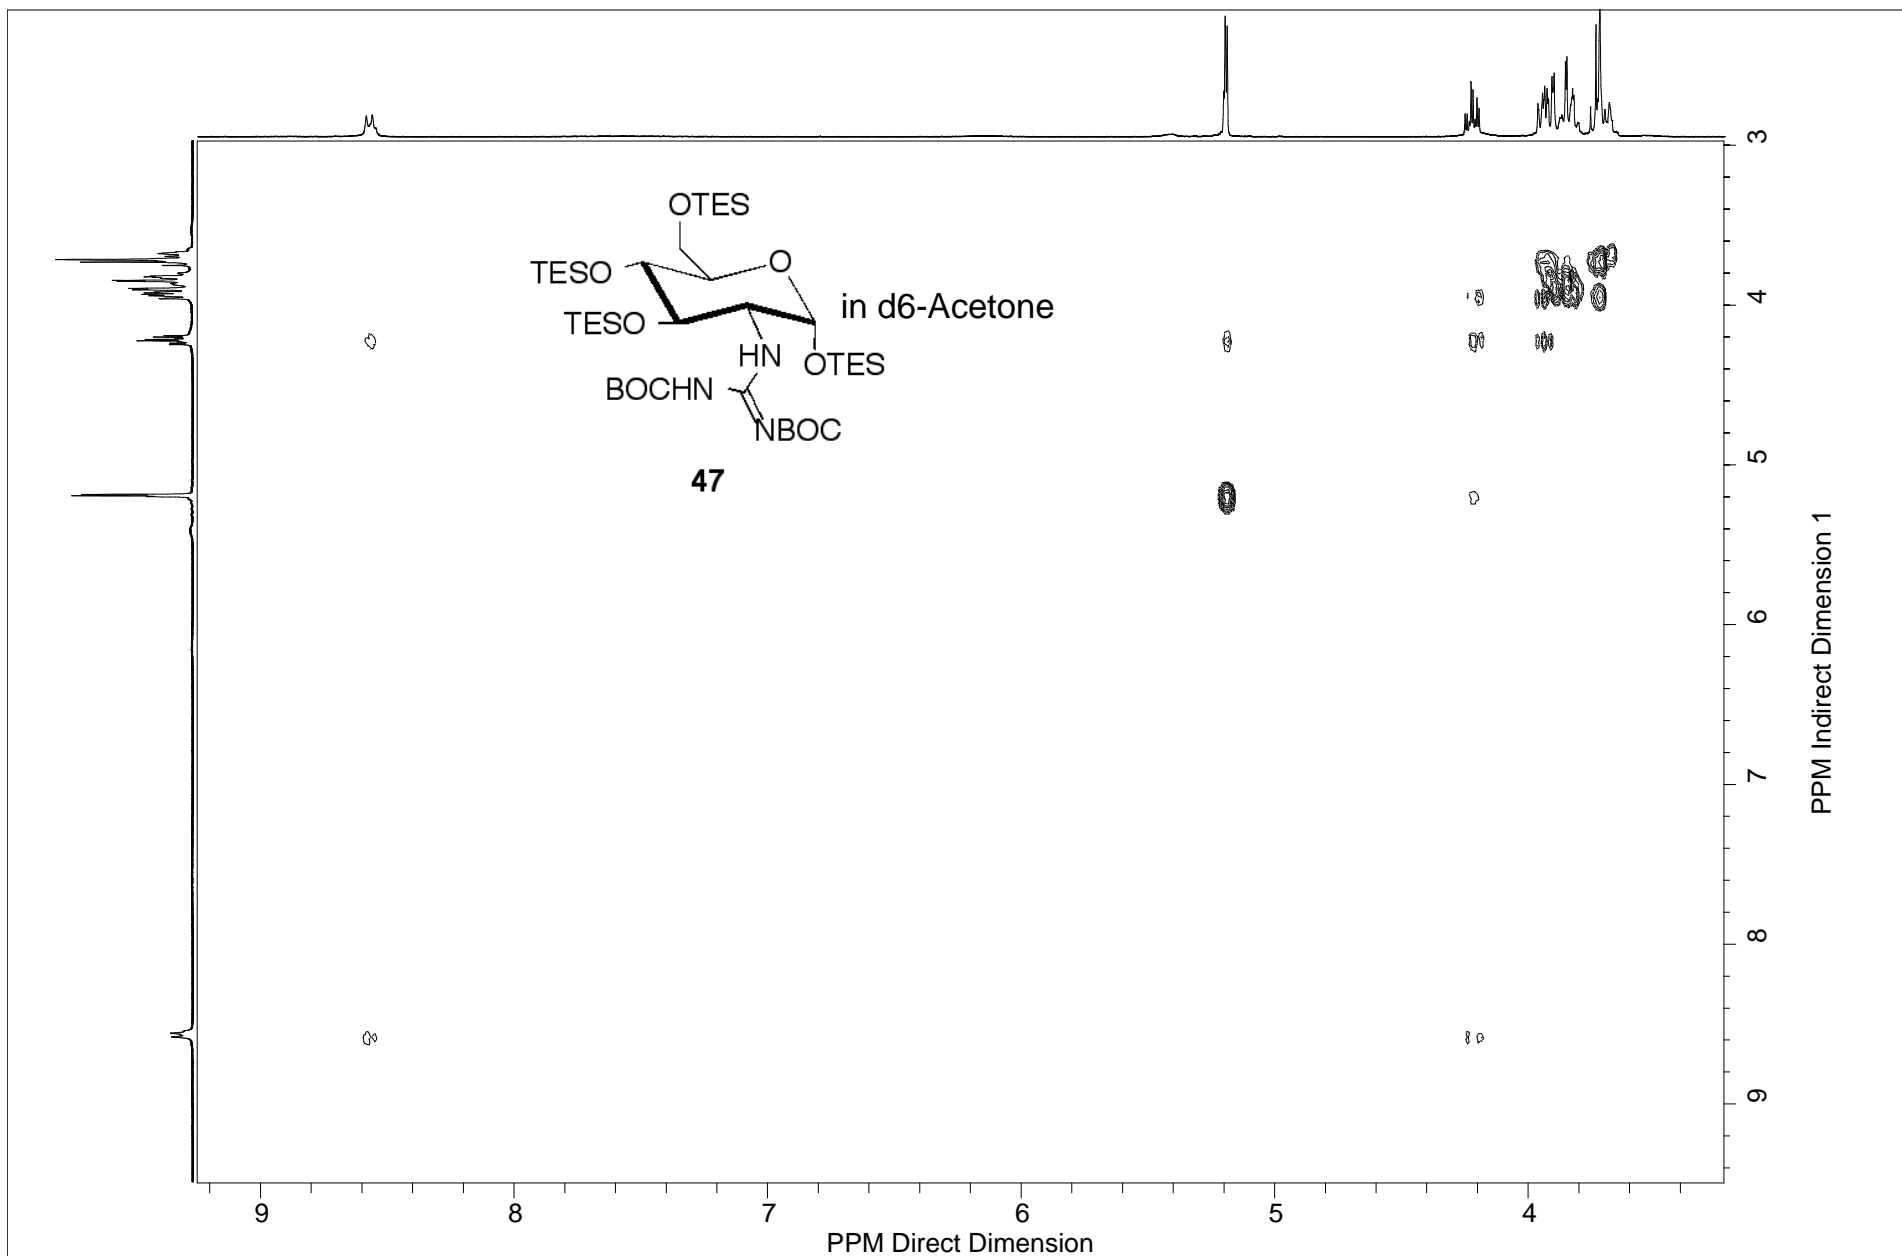

TES4GB2\_in\_CO(CD3)2 (32993)

USER: JR -- DATE: Sep 21, 2009 17:51:49

F1: 399.785

F2: 399.785

SW1: 5597

SW2: 5597

OF1: 2398.7

OF2: 2398.7

PTS1d: 1024 , 1024 PTS2d: 256 , 512

EX: cosy\_pfg.ex2

PW: 13.9us, 90deg

PD: 2.0 sec

NA: 2

LB: 0.0

Nuts - \$\$fh090921\_COSY-1.jdf





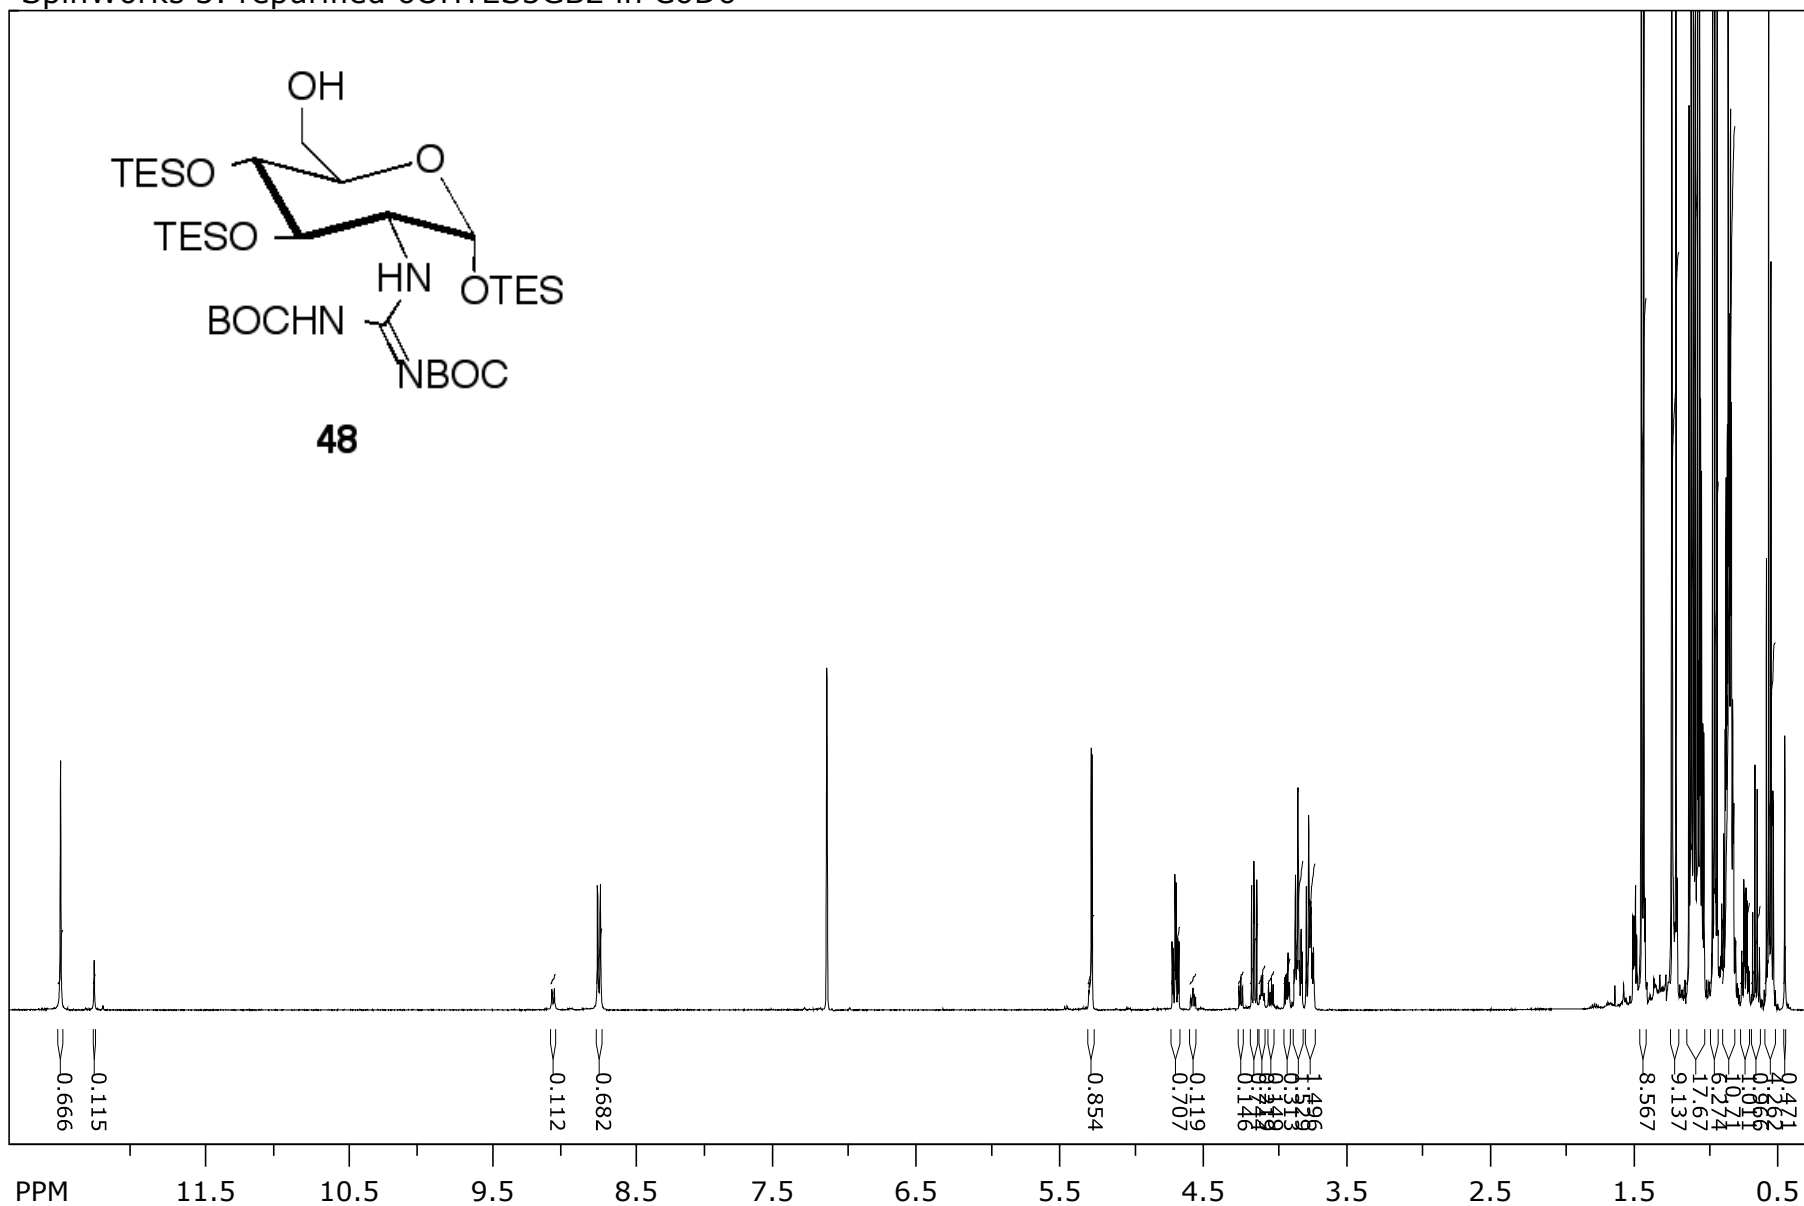

file: ...\_11\6OHTES3GB2 repur in C6D6\1\fid expt: <zg>  
 transmitter freq.: 499.853228 MHz  
 time domain size: 32768 points  
 width: 8012.82 Hz = 16.0303 ppm = 0.244532 Hz/pt  
 number of scans: 64

freq. of 0 ppm: 499.850061 MHz  
 processed size: 16384 complex points  
 LB: 0.000 GF: 0.0000  
 Hz/cm: 263.125 ppm/cm: 0.52640

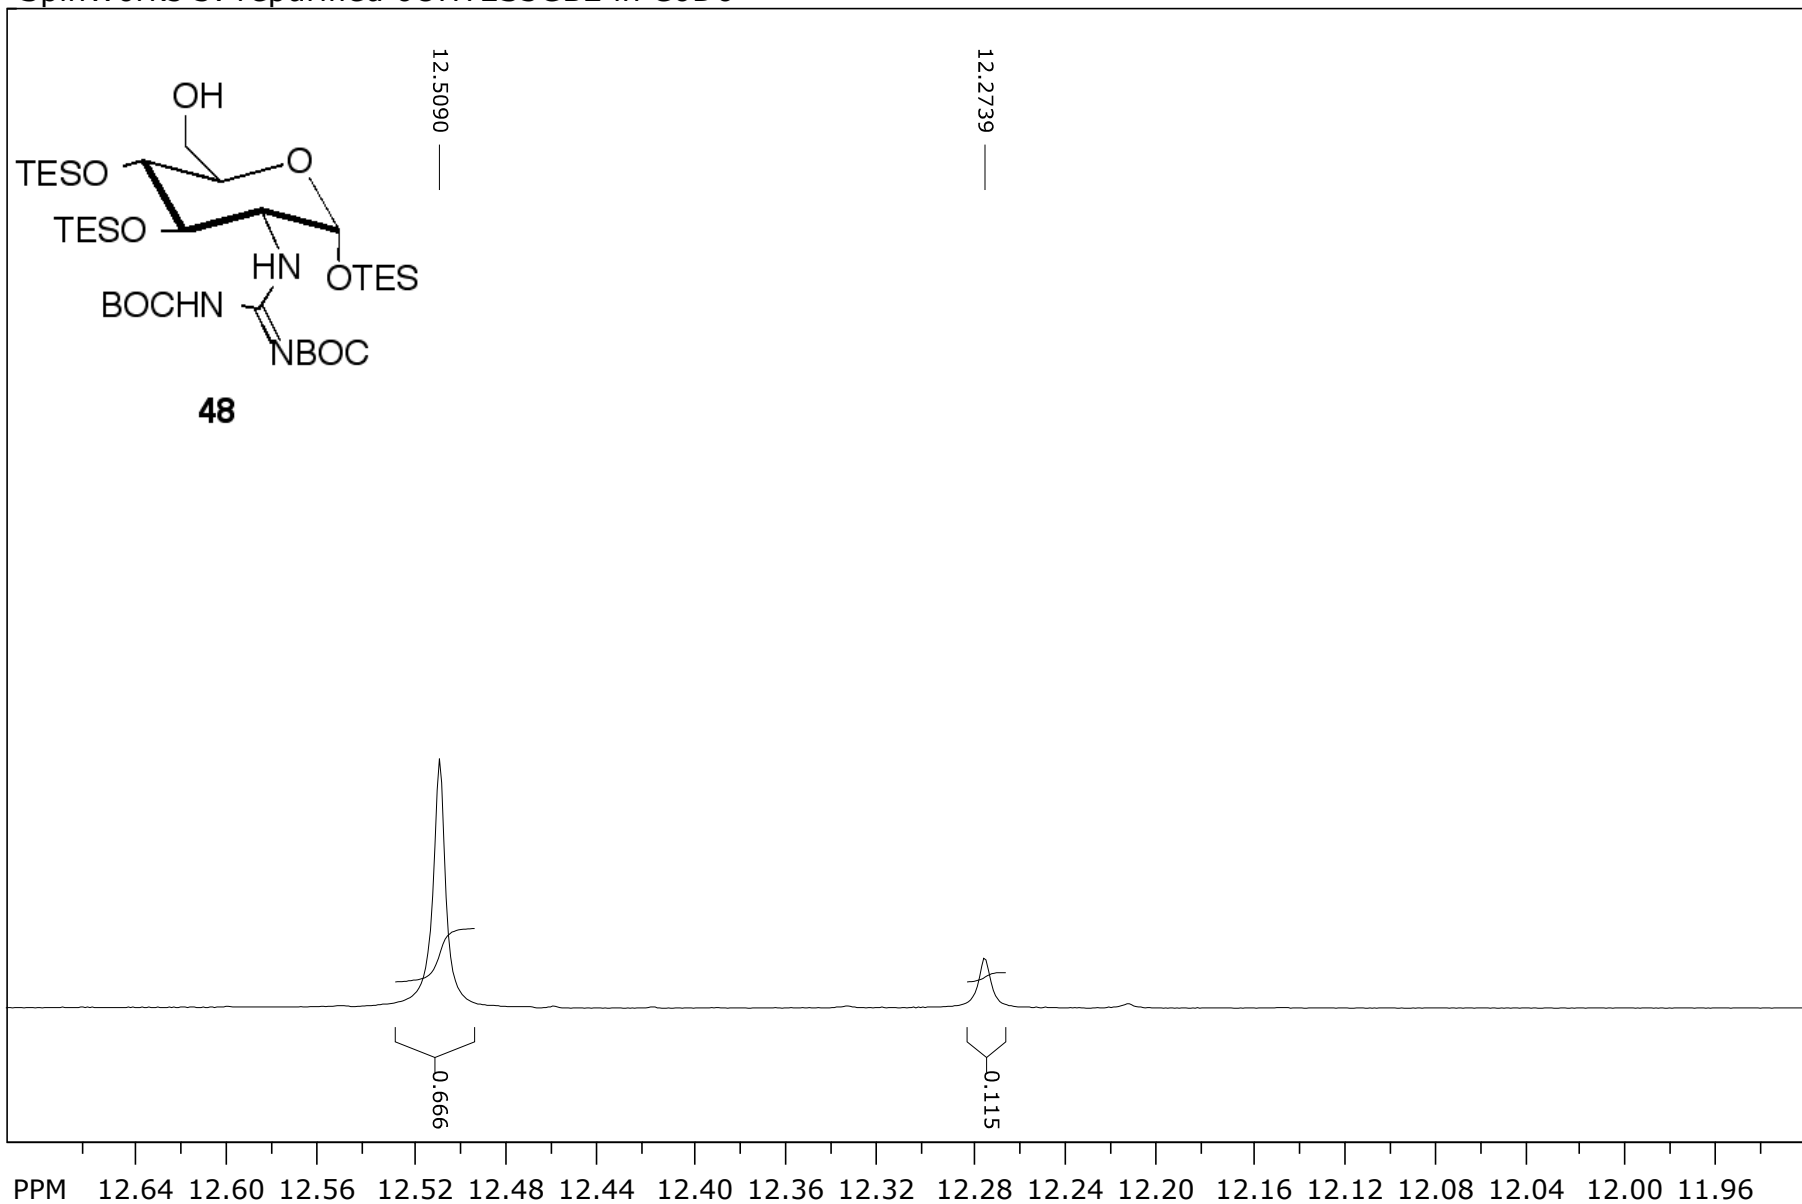

file: ...\_11\6OHTES3GB2 repur in C6D6\1\fid expt: <zg>  
transmitter freq.: 499.853228 MHz  
time domain size: 32768 points  
width: 8012.82 Hz = 16.0303 ppm = 0.244532 Hz/pt  
number of scans: 64

freq. of 0 ppm: 499.850061 MHz  
processed size: 16384 complex points  
LB: 0.000 GF: 0.0000  
Hz/cm: 16.219 ppm/cm: 0.03245

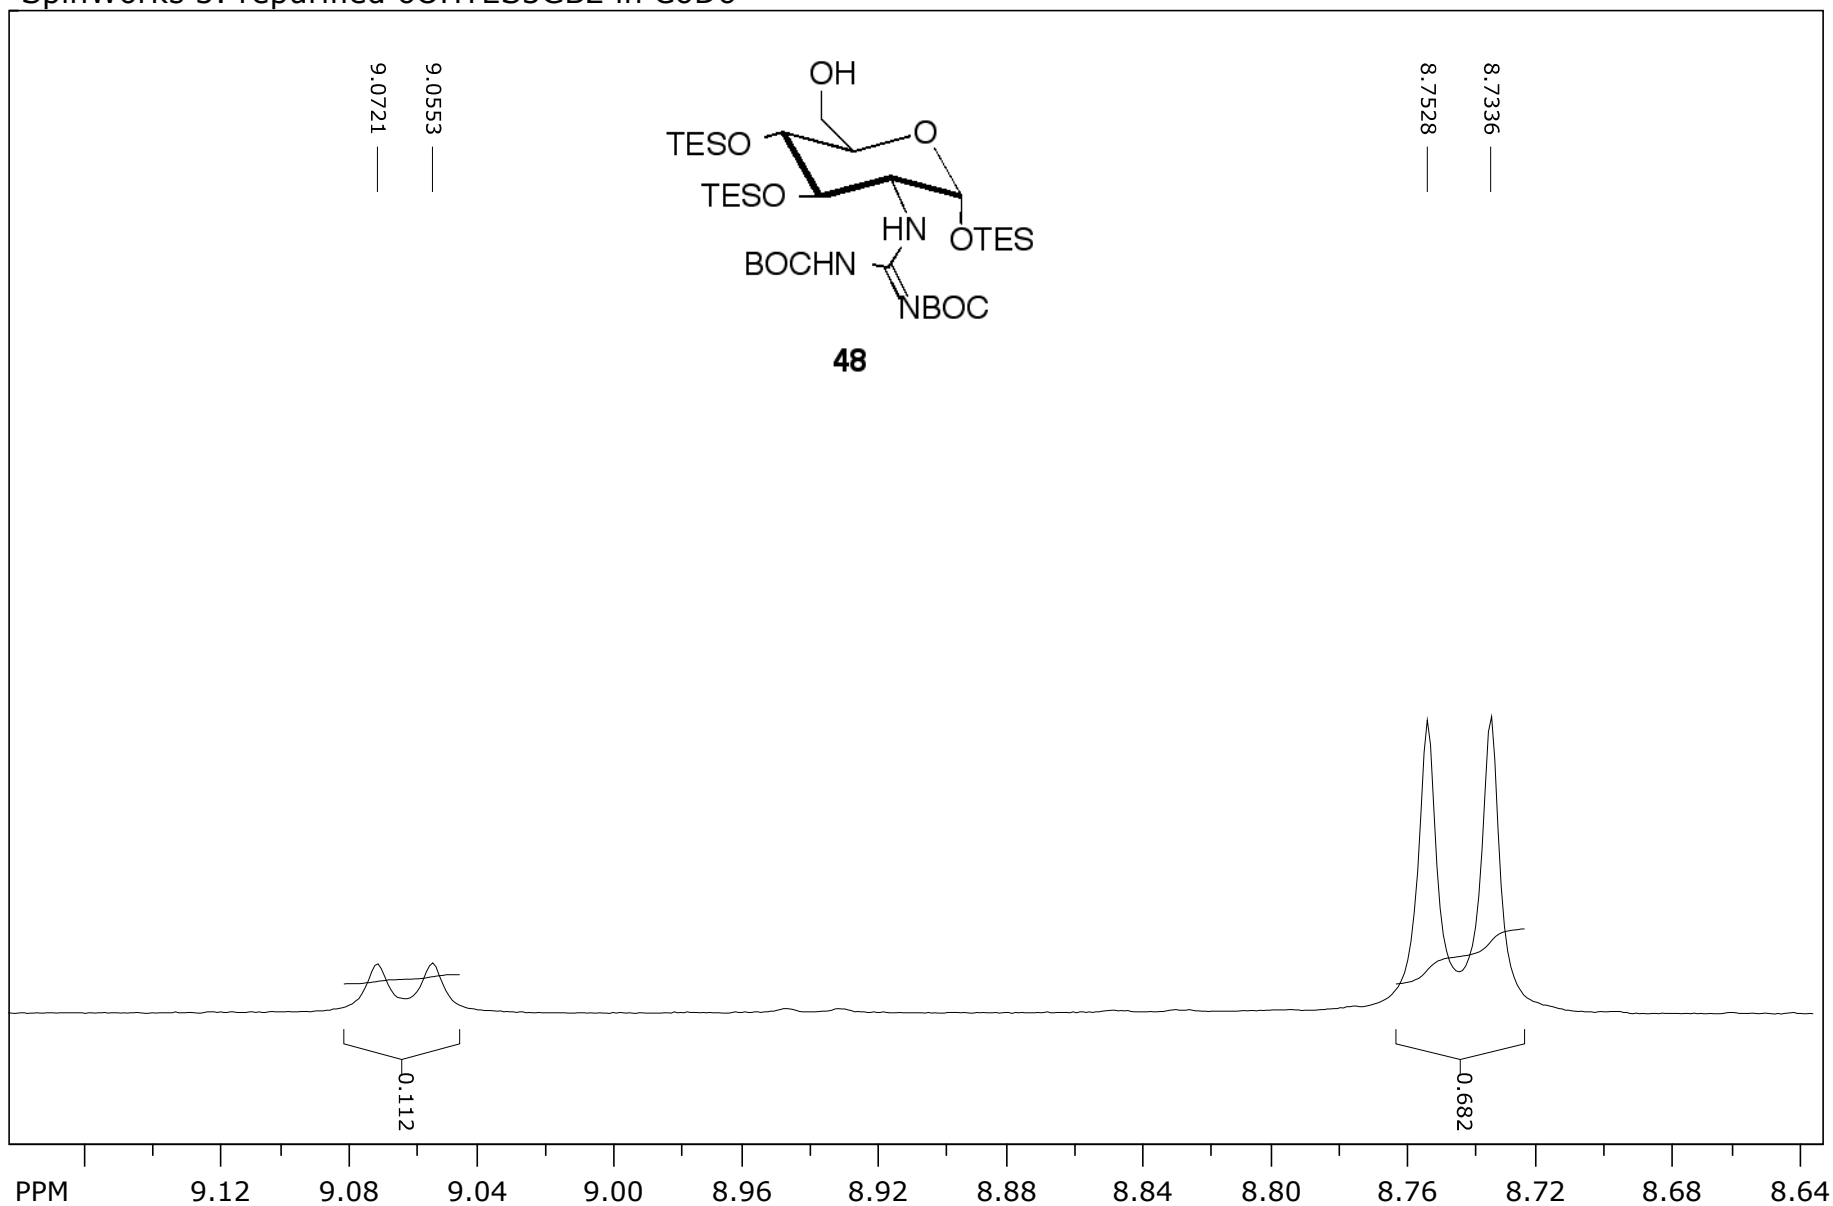

file: ...\_11\6OHTES3GB2 repur in C6D6\1\fid expt: <zg>  
transmitter freq.: 499.853228 MHz  
time domain size: 32768 points  
width: 8012.82 Hz = 16.0303 ppm = 0.244532 Hz/pt  
number of scans: 64

freq. of 0 ppm: 499.850061 MHz  
processed size: 16384 complex points  
LB: 0.000 GF: 0.0000  
Hz/cm: 11.440 ppm/cm: 0.02289

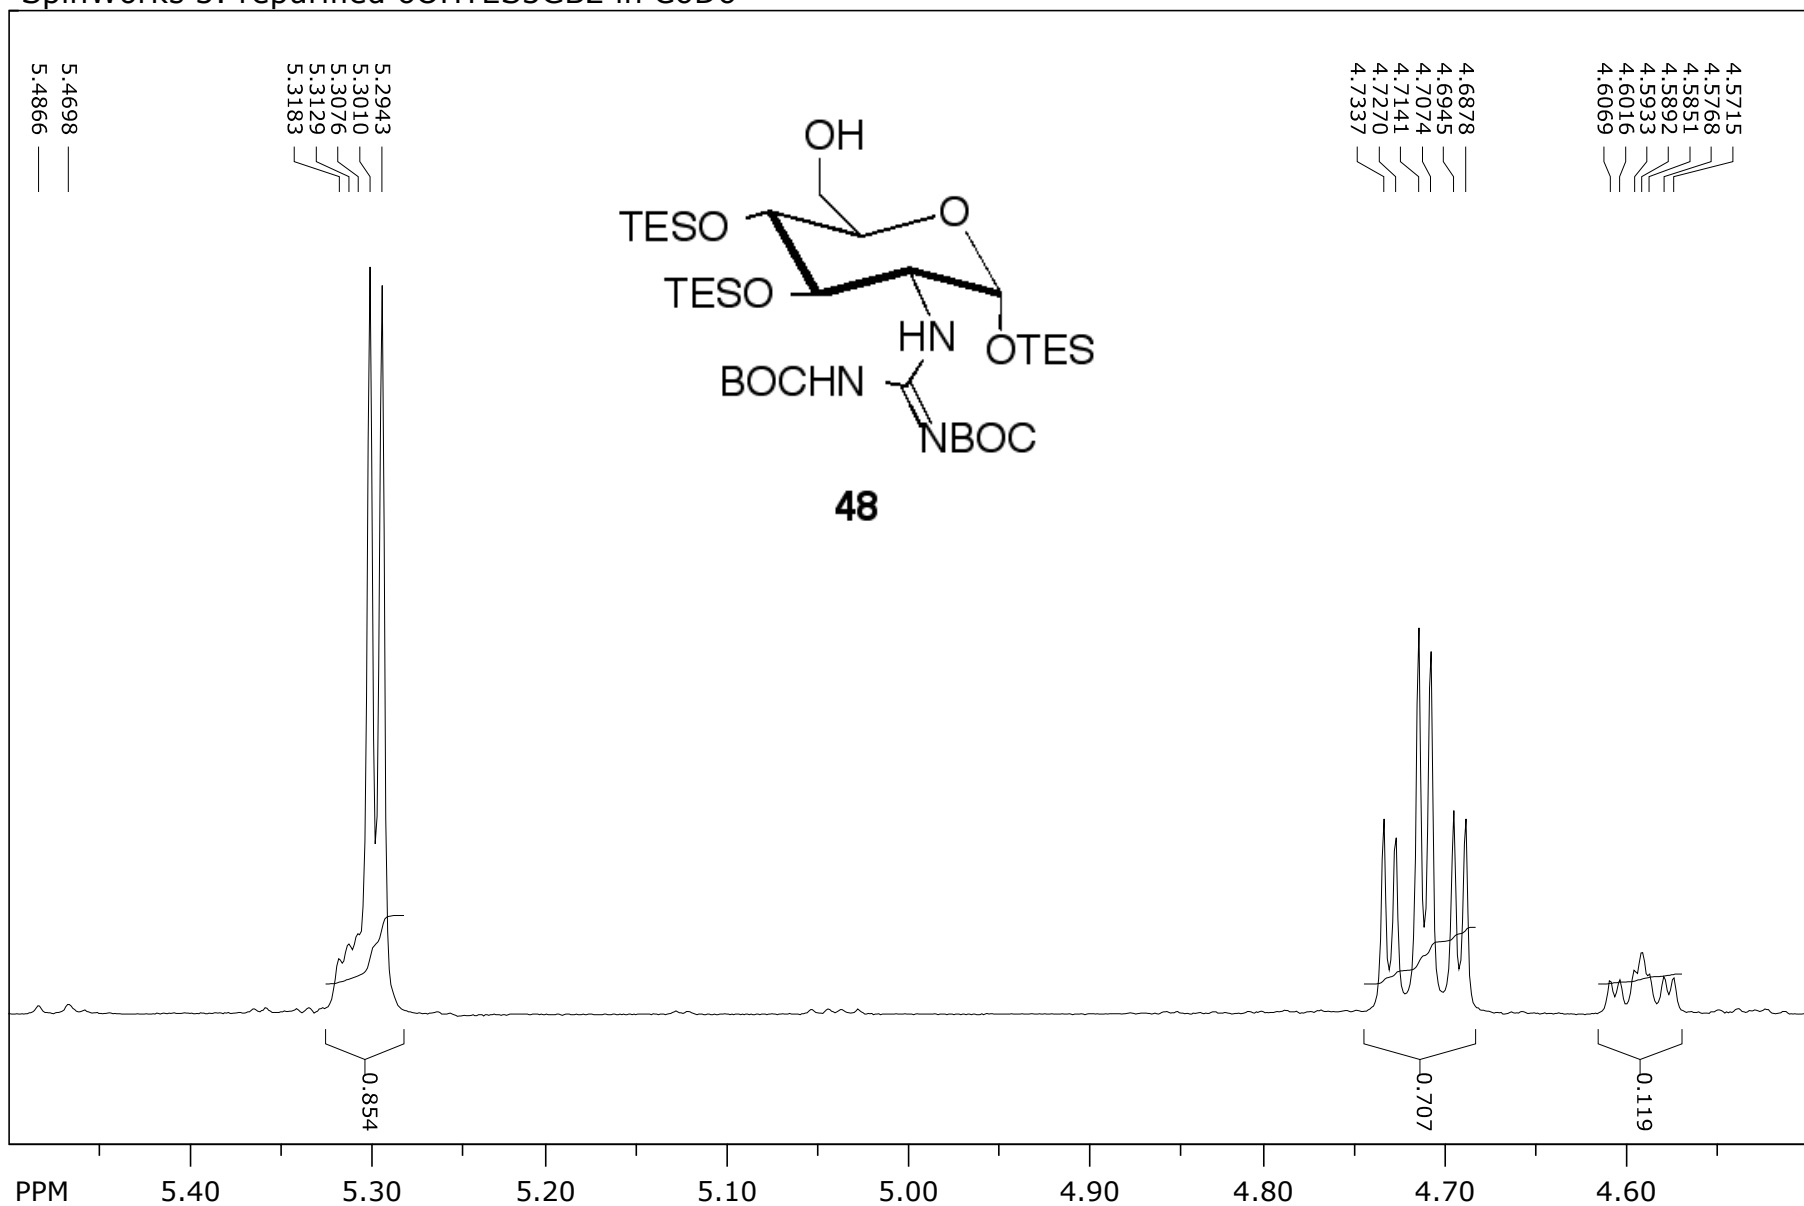

file: ...\_11\6OHTES3GB2 repur in C6D6\1\fid expt: <zg>  
 transmitter freq.: 499.853228 MHz  
 time domain size: 32768 points  
 width: 8012.82 Hz = 16.0303 ppm = 0.244532 Hz/pt  
 number of scans: 64

freq. of 0 ppm: 499.850061 MHz  
 processed size: 16384 complex points  
 LB: 0.000 GF: 0.0000  
 Hz/cm: 21.059 ppm/cm: 0.04213

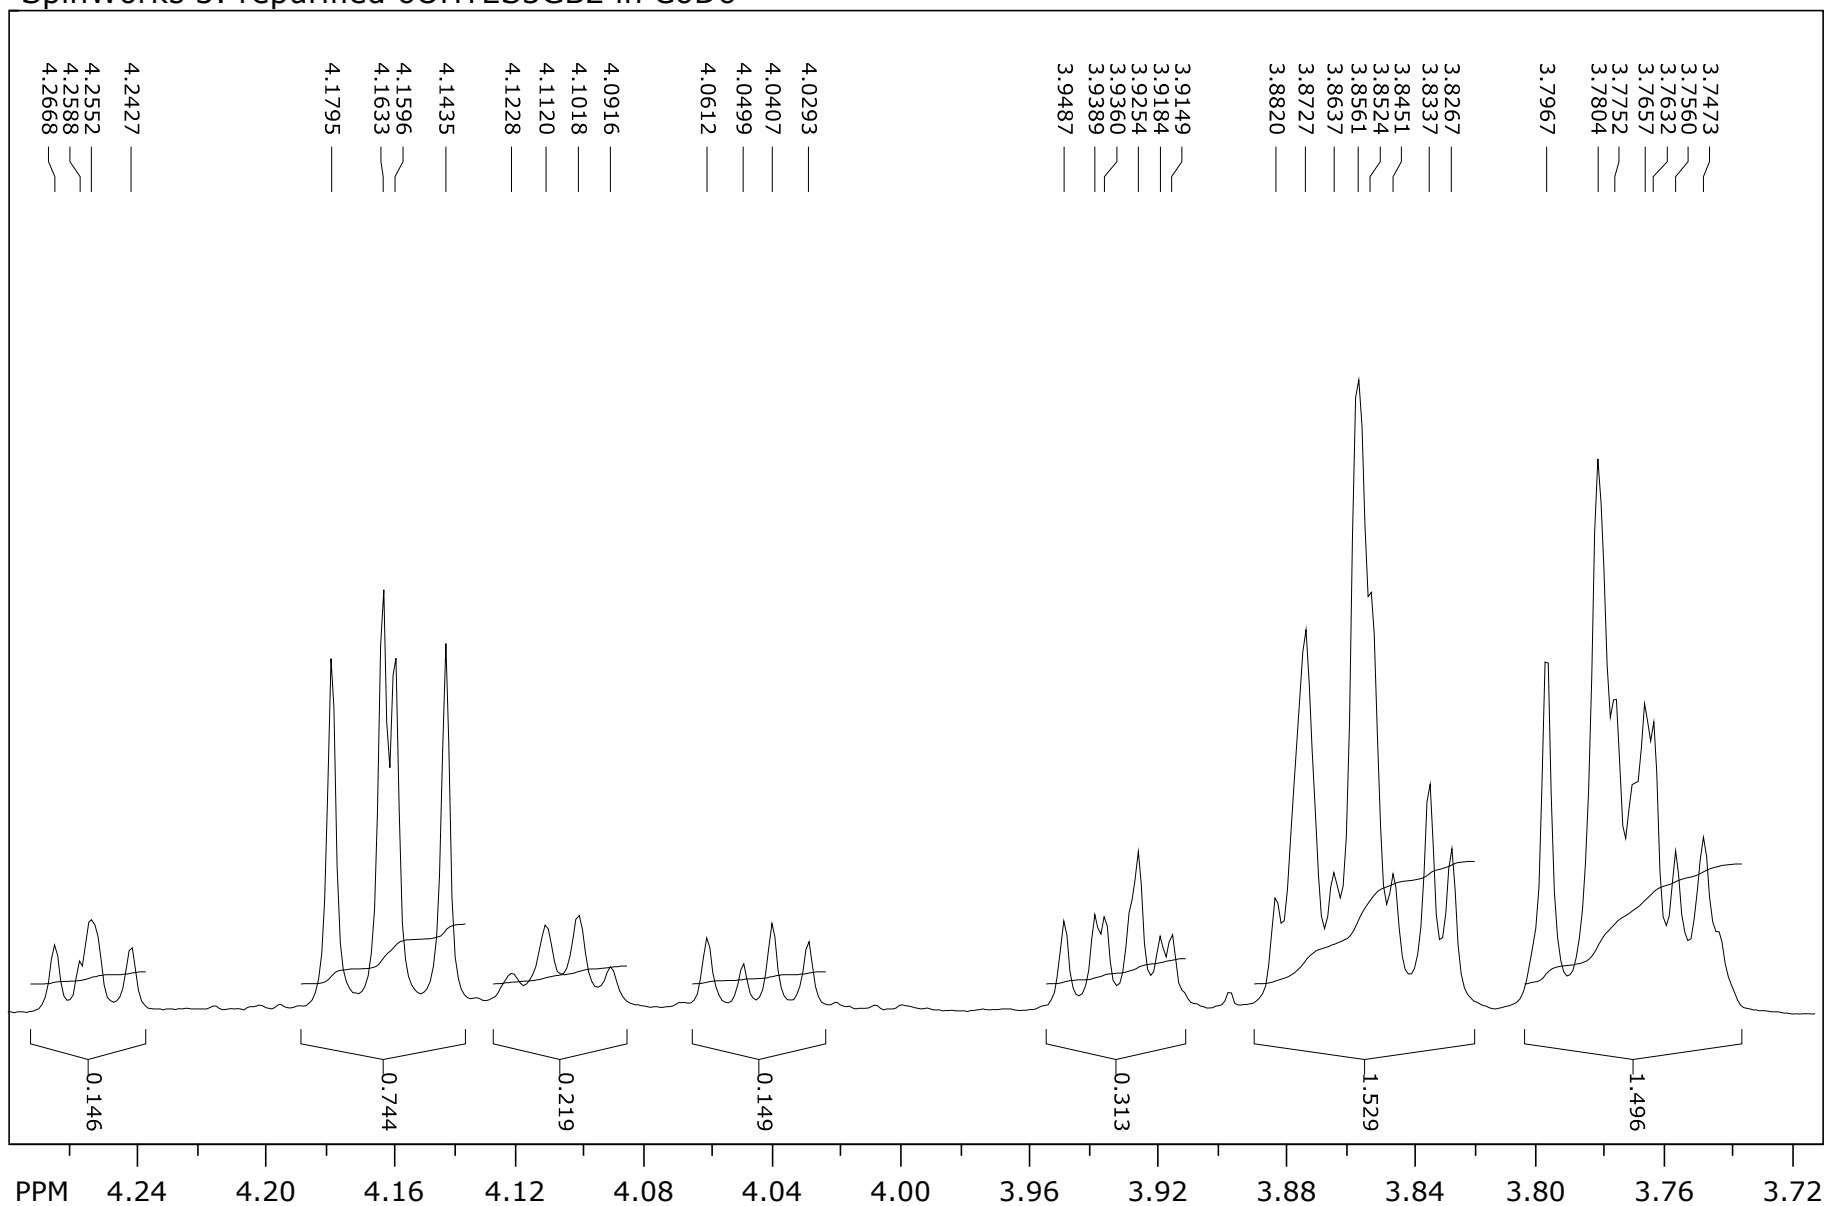

file: ...\_11\6OHTES3GB2 repur in C6D6\1\fid expt: <zg>  
transmitter freq.: 499.853228 MHz  
time domain size: 32768 points  
width: 8012.82 Hz = 16.0303 ppm = 0.244532 Hz/pt  
number of scans: 64

freq. of 0 ppm: 499.850061 MHz  
processed size: 16384 complex points  
LB: 0.000 GF: 0.0000  
Hz/cm: 11.855 ppm/cm: 0.02372

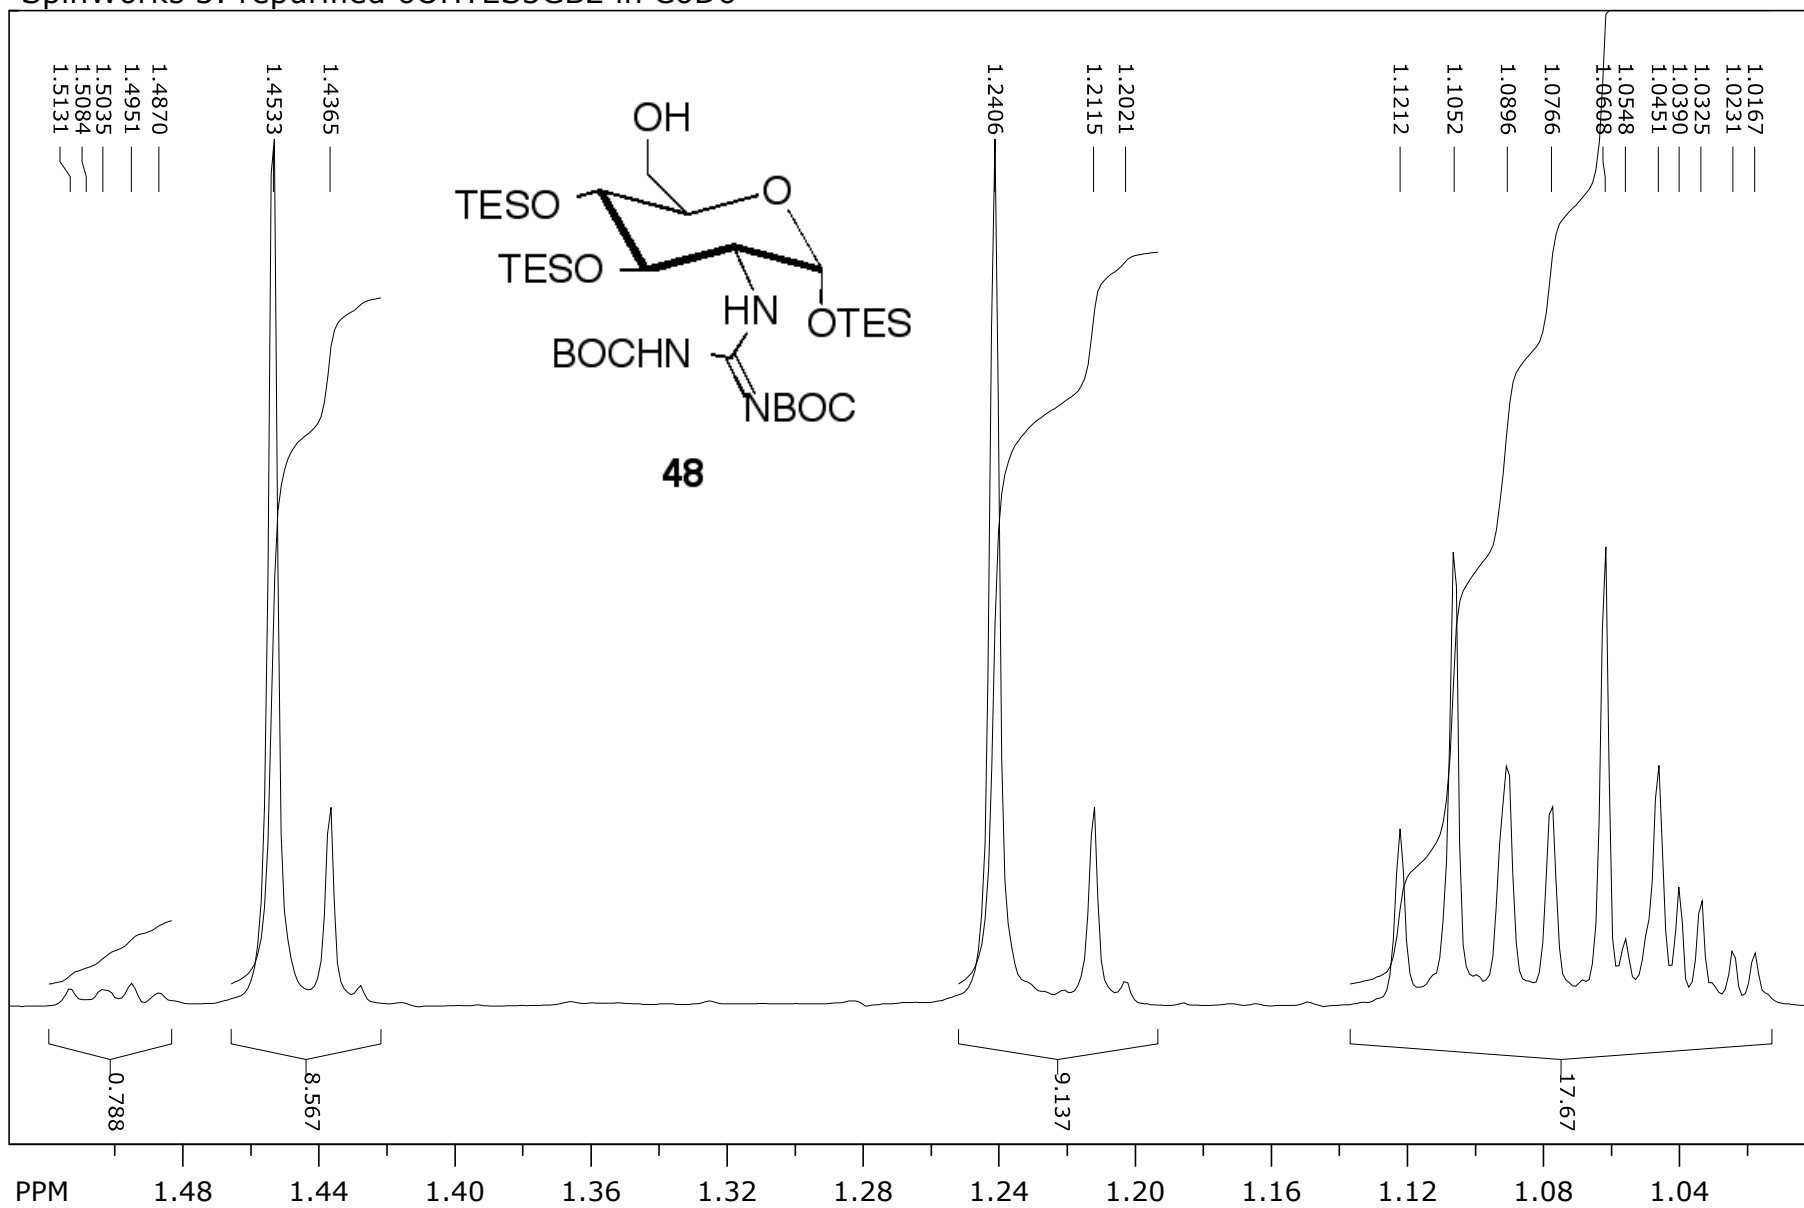

file: ...\_11\6OHTES3GB2 repur in C6D6\1\fid expt: <zg>  
 transmitter freq.: 499.853228 MHz  
 time domain size: 32768 points  
 width: 8012.82 Hz = 16.0303 ppm = 0.244532 Hz/pt  
 number of scans: 64

freq. of 0 ppm: 499.850061 MHz  
 processed size: 16384 complex points  
 LB: 0.000 GF: 0.0000  
 Hz/cm: 11.088 ppm/cm: 0.02218

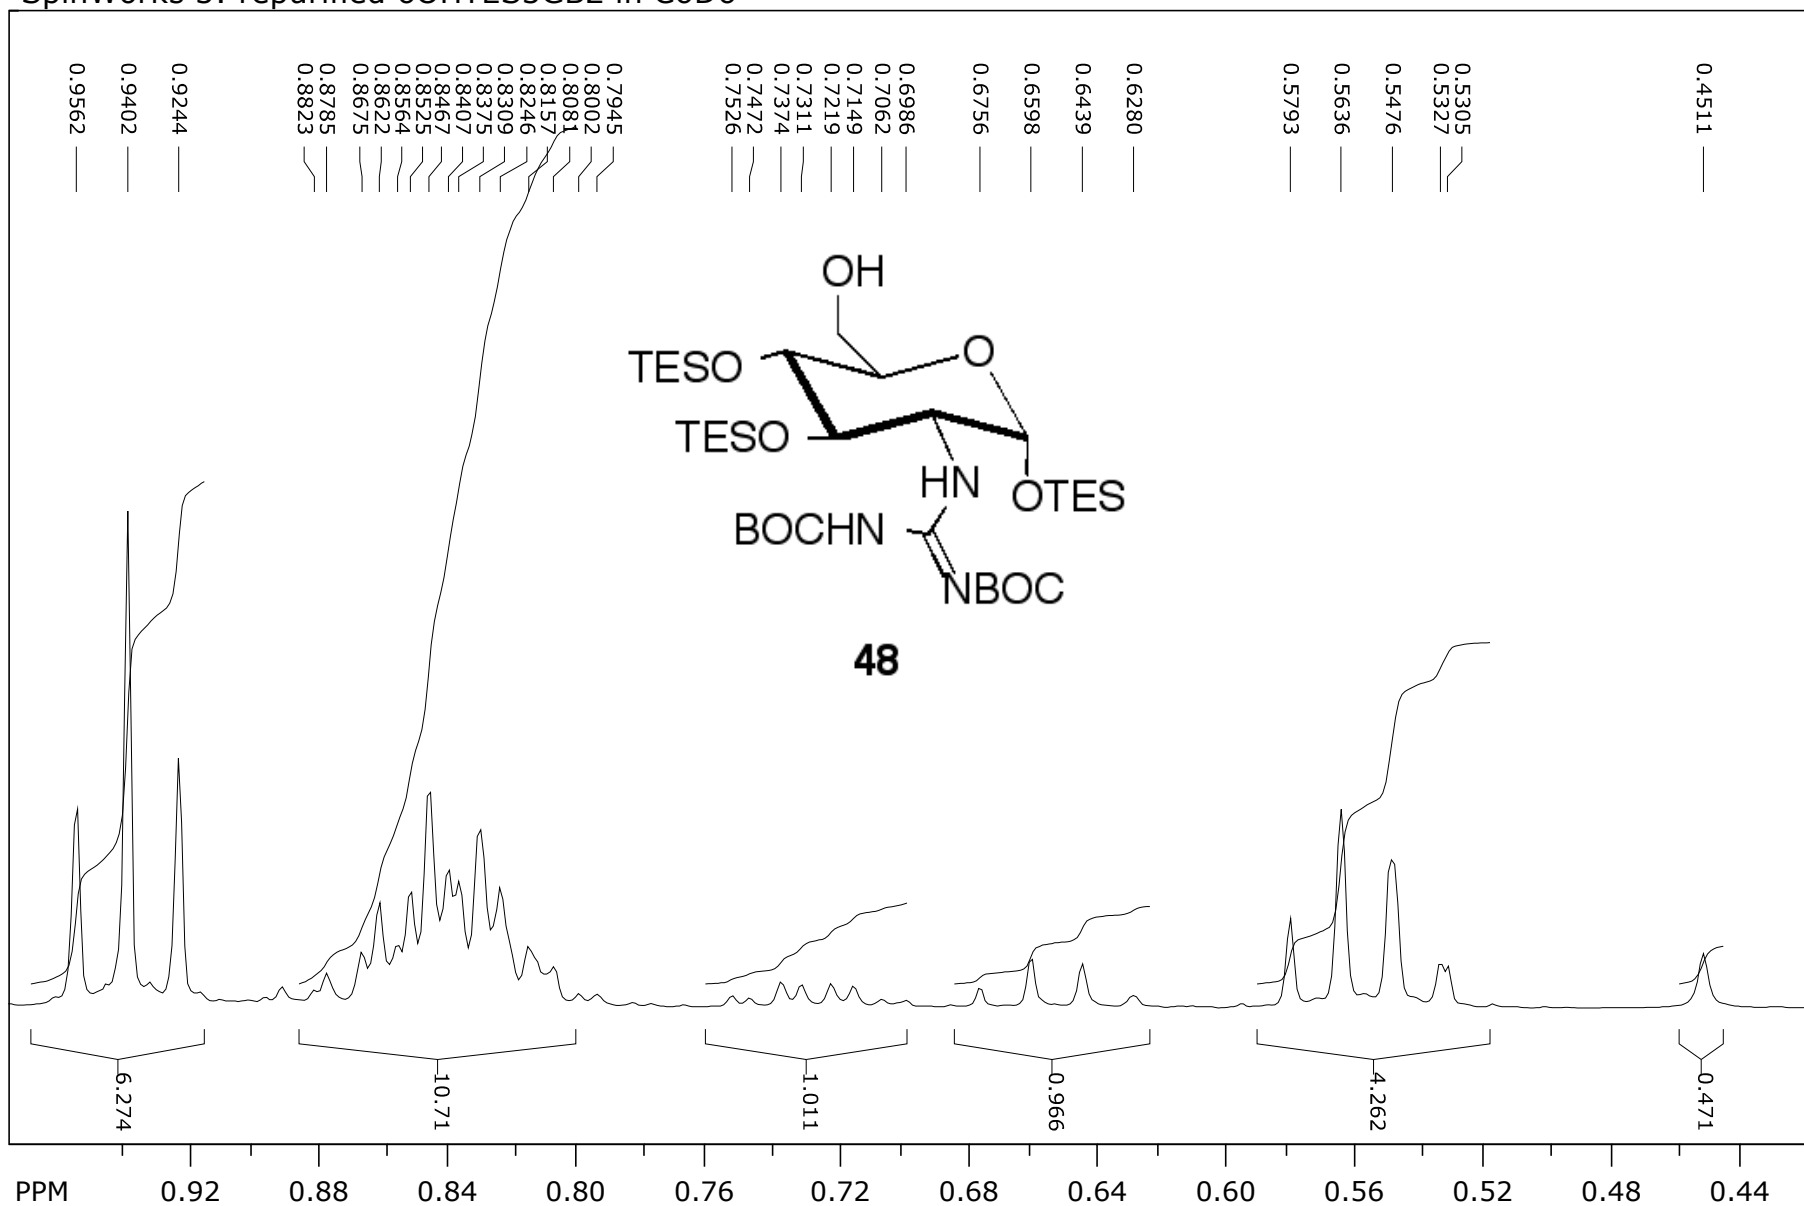

file: ...\_11\6OHTES3GB2 repur in C6D6\1\fid expt: <zg>  
 transmitter freq.: 499.853228 MHz  
 time domain size: 32768 points  
 width: 8012.82 Hz = 16.0303 ppm = 0.244532 Hz/pt  
 number of scans: 64

freq. of 0 ppm: 499.850061 MHz  
 processed size: 16384 complex points  
 LB: 0.000 GF: 0.0000  
 Hz/cm: 11.682 ppm/cm: 0.02337



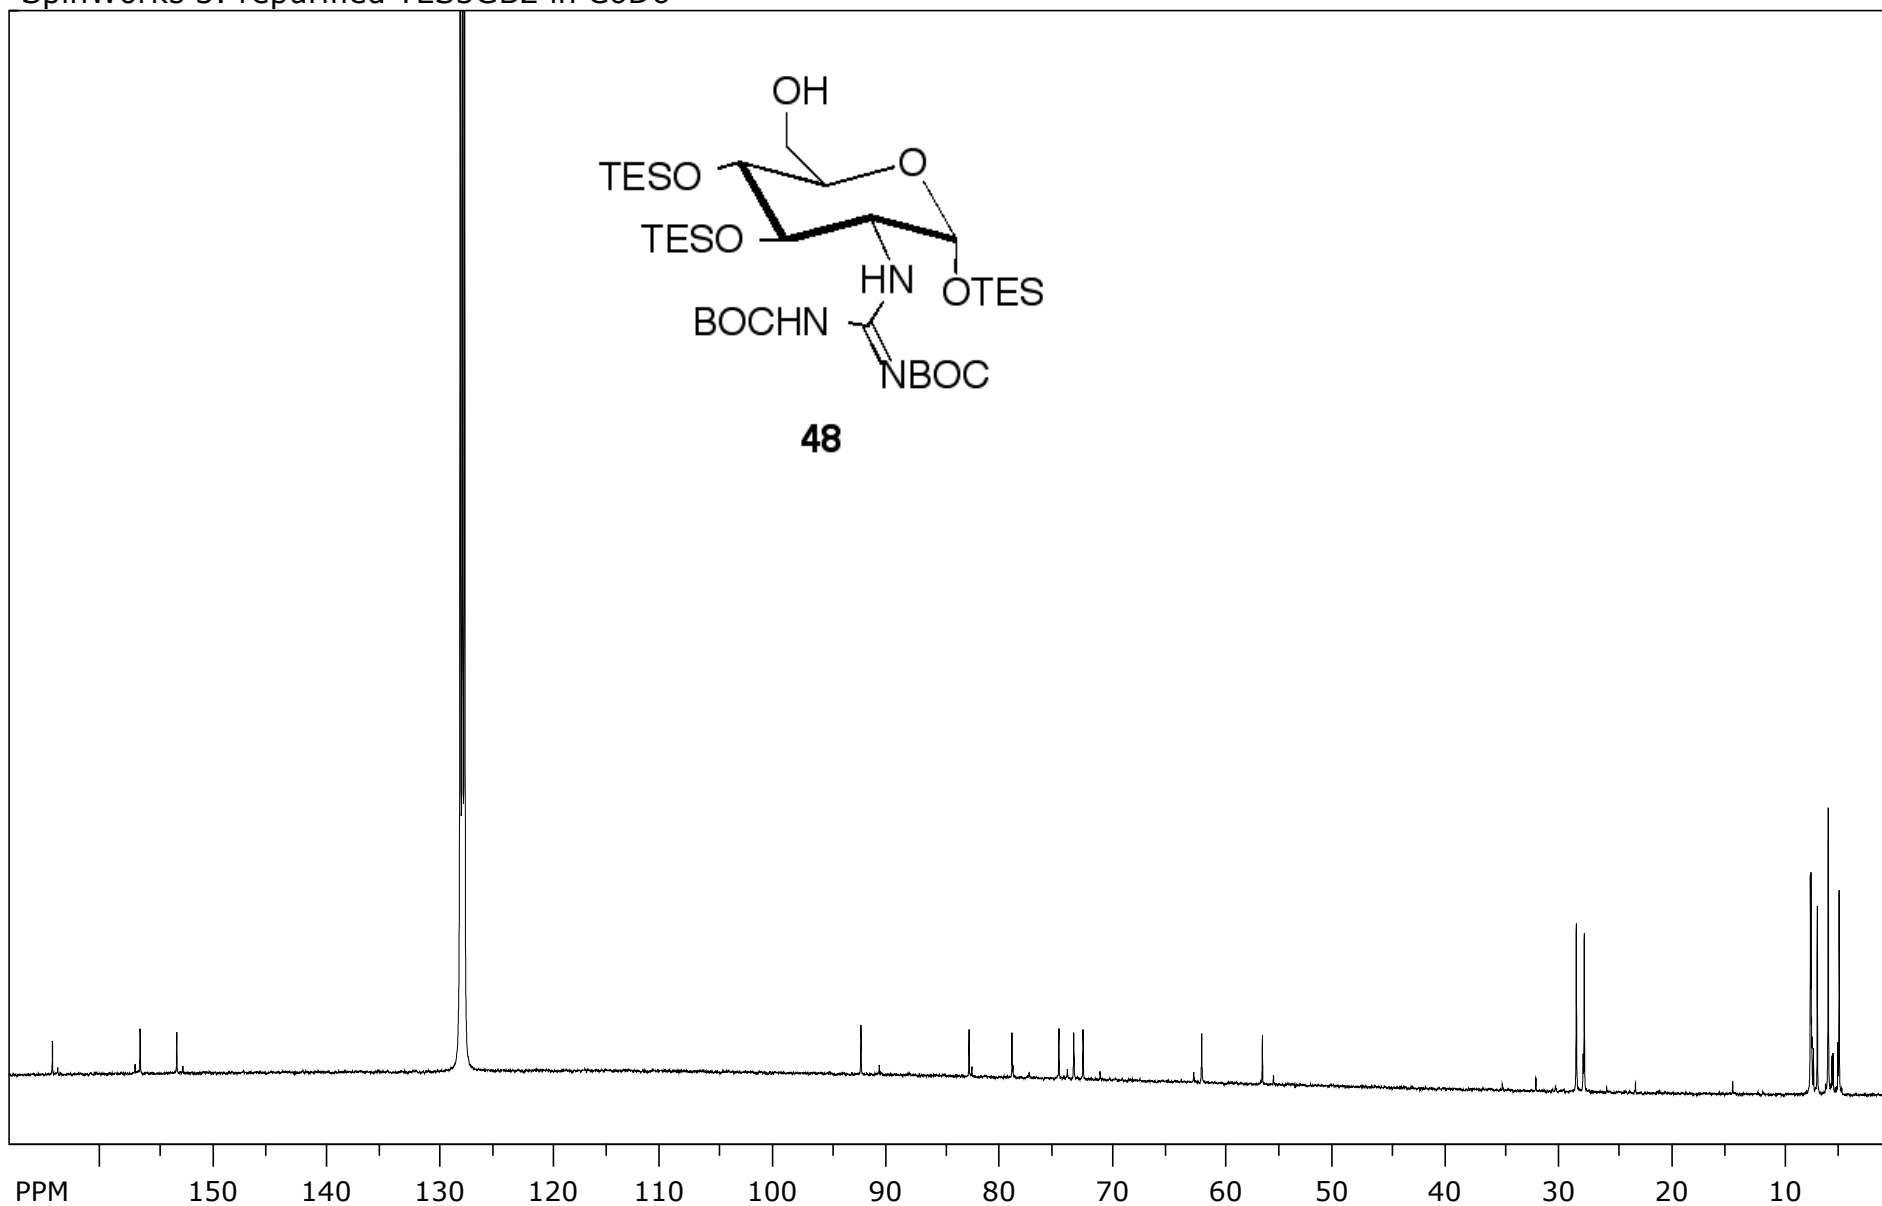

file: ...\_11\6OHTES3GB2 repur in C6D6\2\fid expt: <zgpg>  
transmitter freq.: 125.699901 MHz  
time domain size: 65536 points  
width: 27777.78 Hz = 220.9849 ppm = 0.423855 Hz/pt  
number of scans: 5120

freq. of 0 ppm: 125.687357 MHz  
processed size: 32768 complex points  
LB: 3.500 GF: 0.0000  
Hz/cm: 846.939 ppm/cm: 6.73779

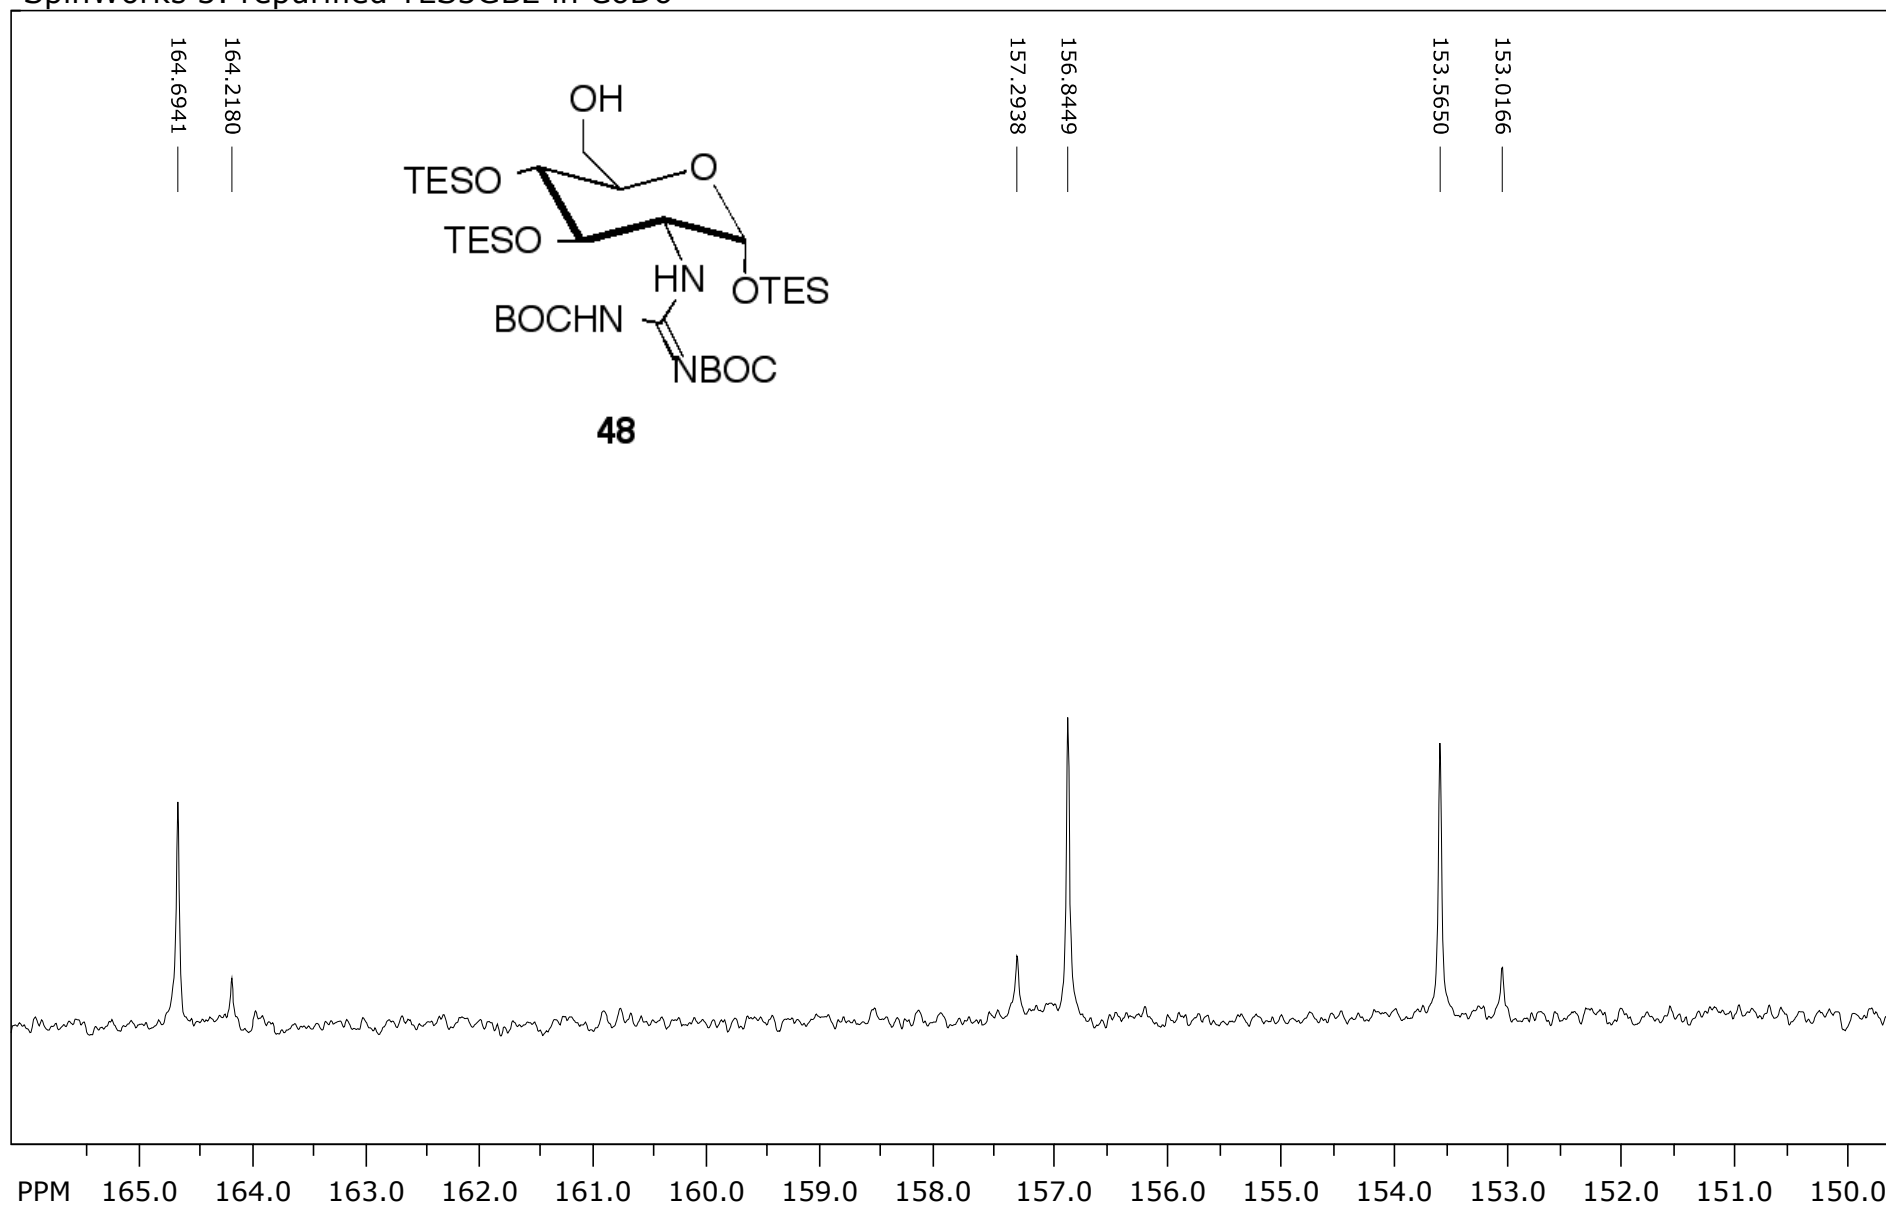

file: ...\_11\6OHTES3GB2 repur in C6D6\2\fid expt: <zpgg>  
transmitter freq.: 125.699901 MHz  
time domain size: 65536 points  
width: 27777.78 Hz = 220.9849 ppm = 0.423855 Hz/pt  
number of scans: 5120

freq. of 0 ppm: 125.687357 MHz  
processed size: 32768 complex points  
LB: 3.500 GF: 0.0000  
Hz/cm: 83.435 ppm/cm: 0.66377

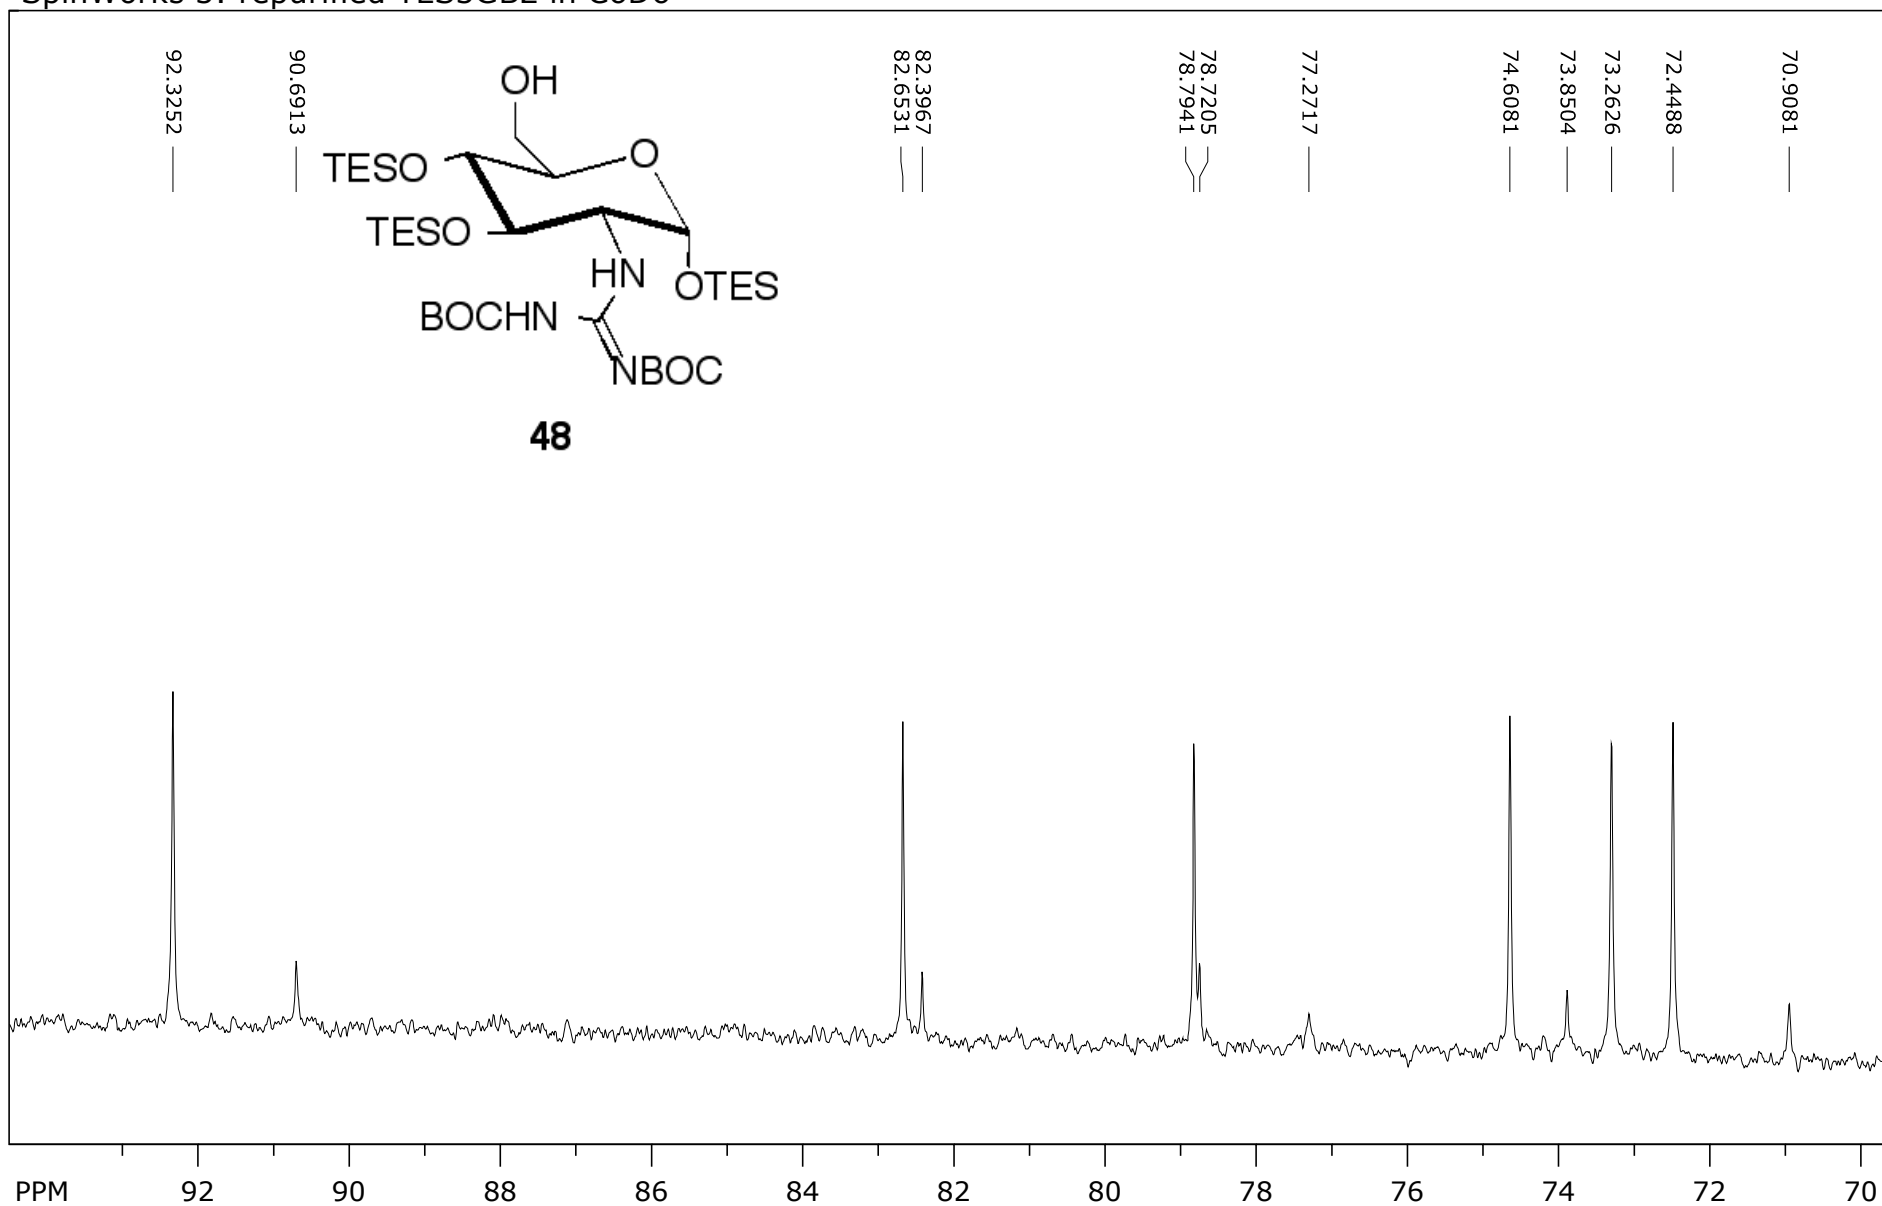

file: ...\_11\6OHTES3GB2 repur in C6D6\2\fid expt: <zpgp>  
transmitter freq.: 125.699901 MHz  
time domain size: 65536 points  
width: 27777.78 Hz = 220.9849 ppm = 0.423855 Hz/pt  
number of scans: 5120

freq. of 0 ppm: 125.687357 MHz  
processed size: 32768 complex points  
LB: 3.500 GF: 0.0000  
Hz/cm: 125.386 ppm/cm: 0.99750

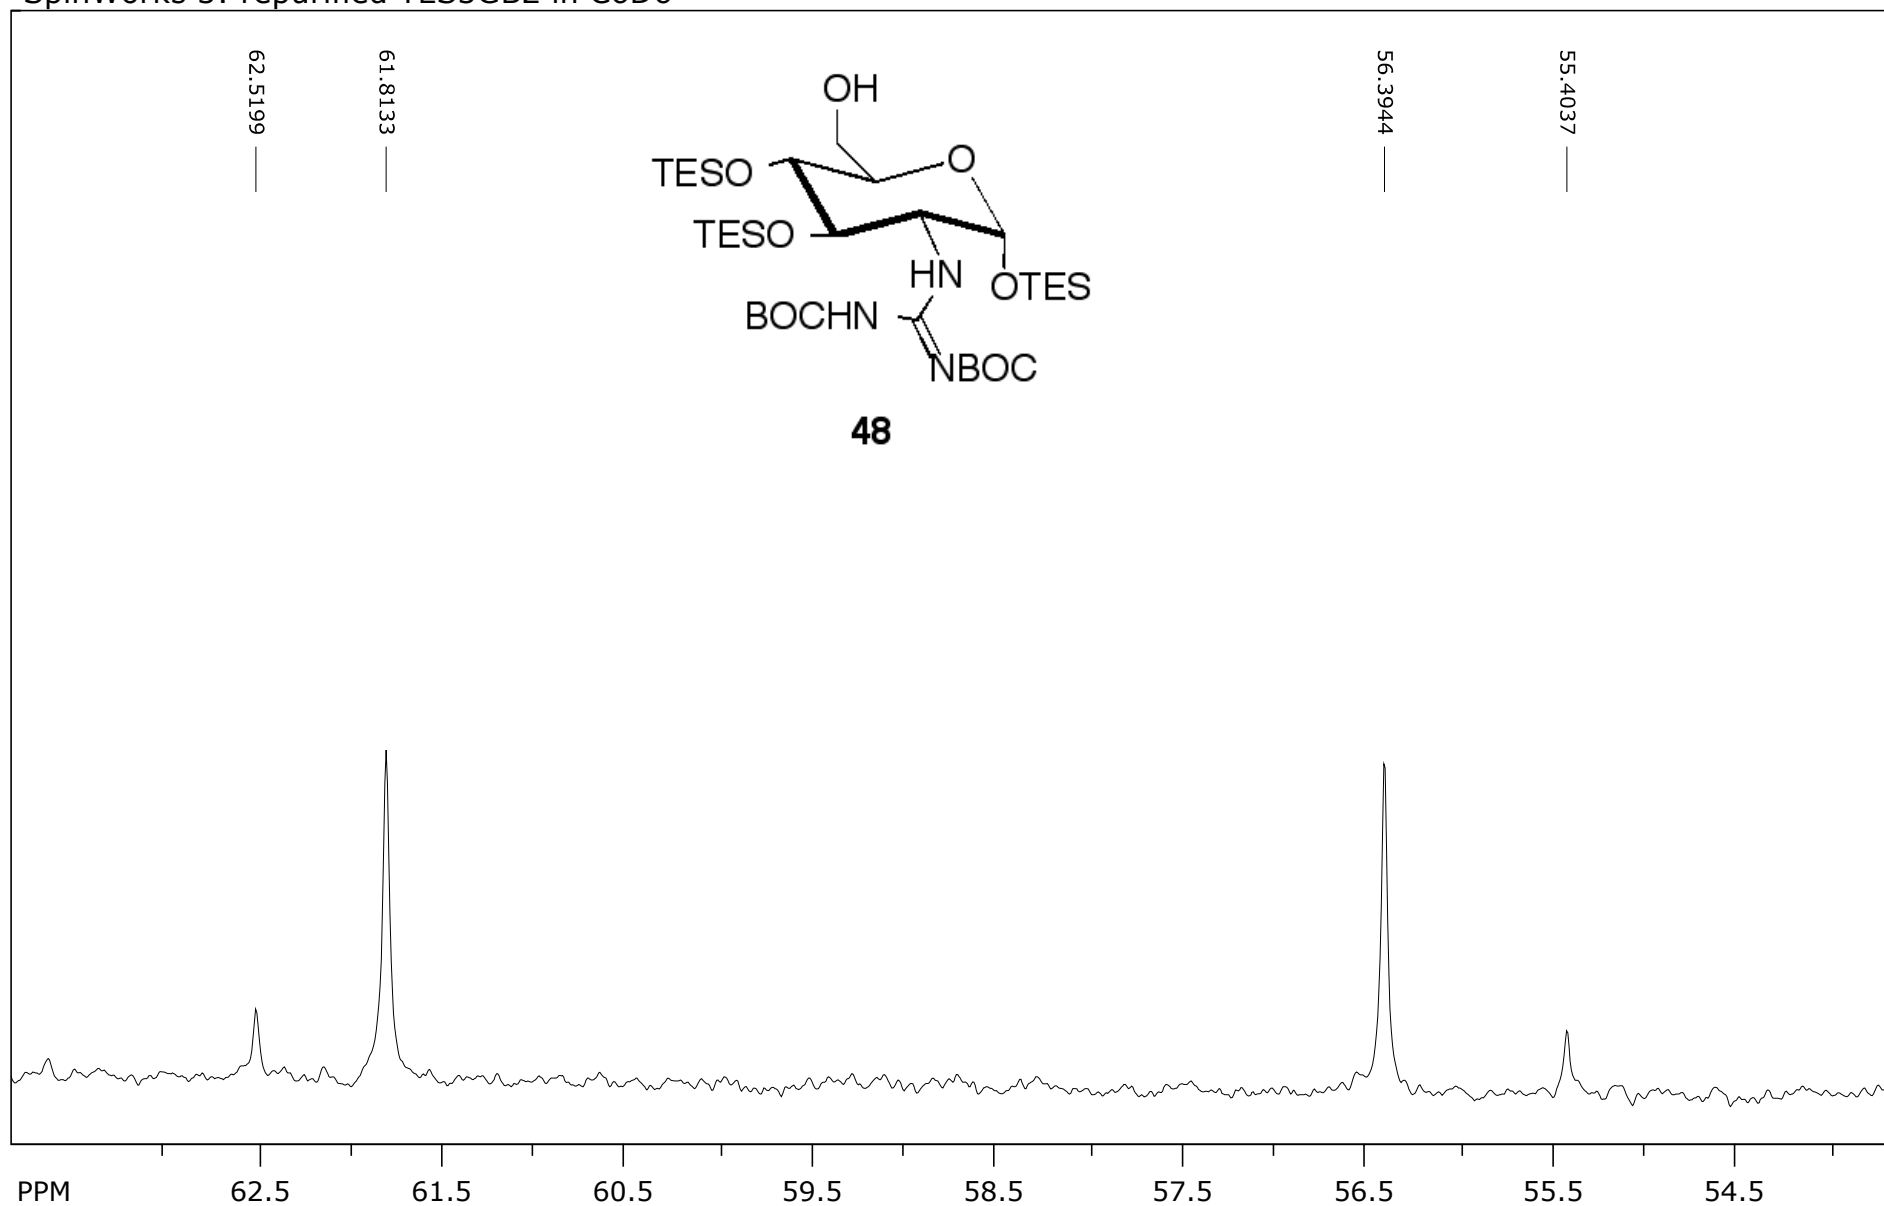

file: ...\_11\6OHTES3GB2 repur in C6D6\2\fid expt: <zgpg>  
transmitter freq.: 125.699901 MHz  
time domain size: 65536 points  
width: 27777.78 Hz = 220.9849 ppm = 0.423855 Hz/pt  
number of scans: 5120

freq. of 0 ppm: 125.687357 MHz  
processed size: 32768 complex points  
LB: 3.500 GF: 0.0000  
Hz/cm: 51.367 ppm/cm: 0.40865

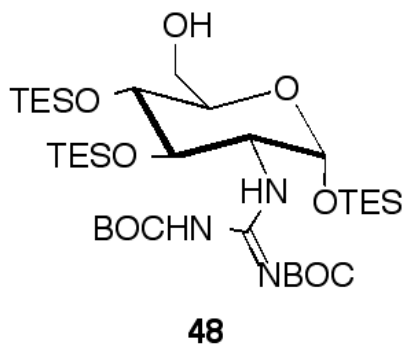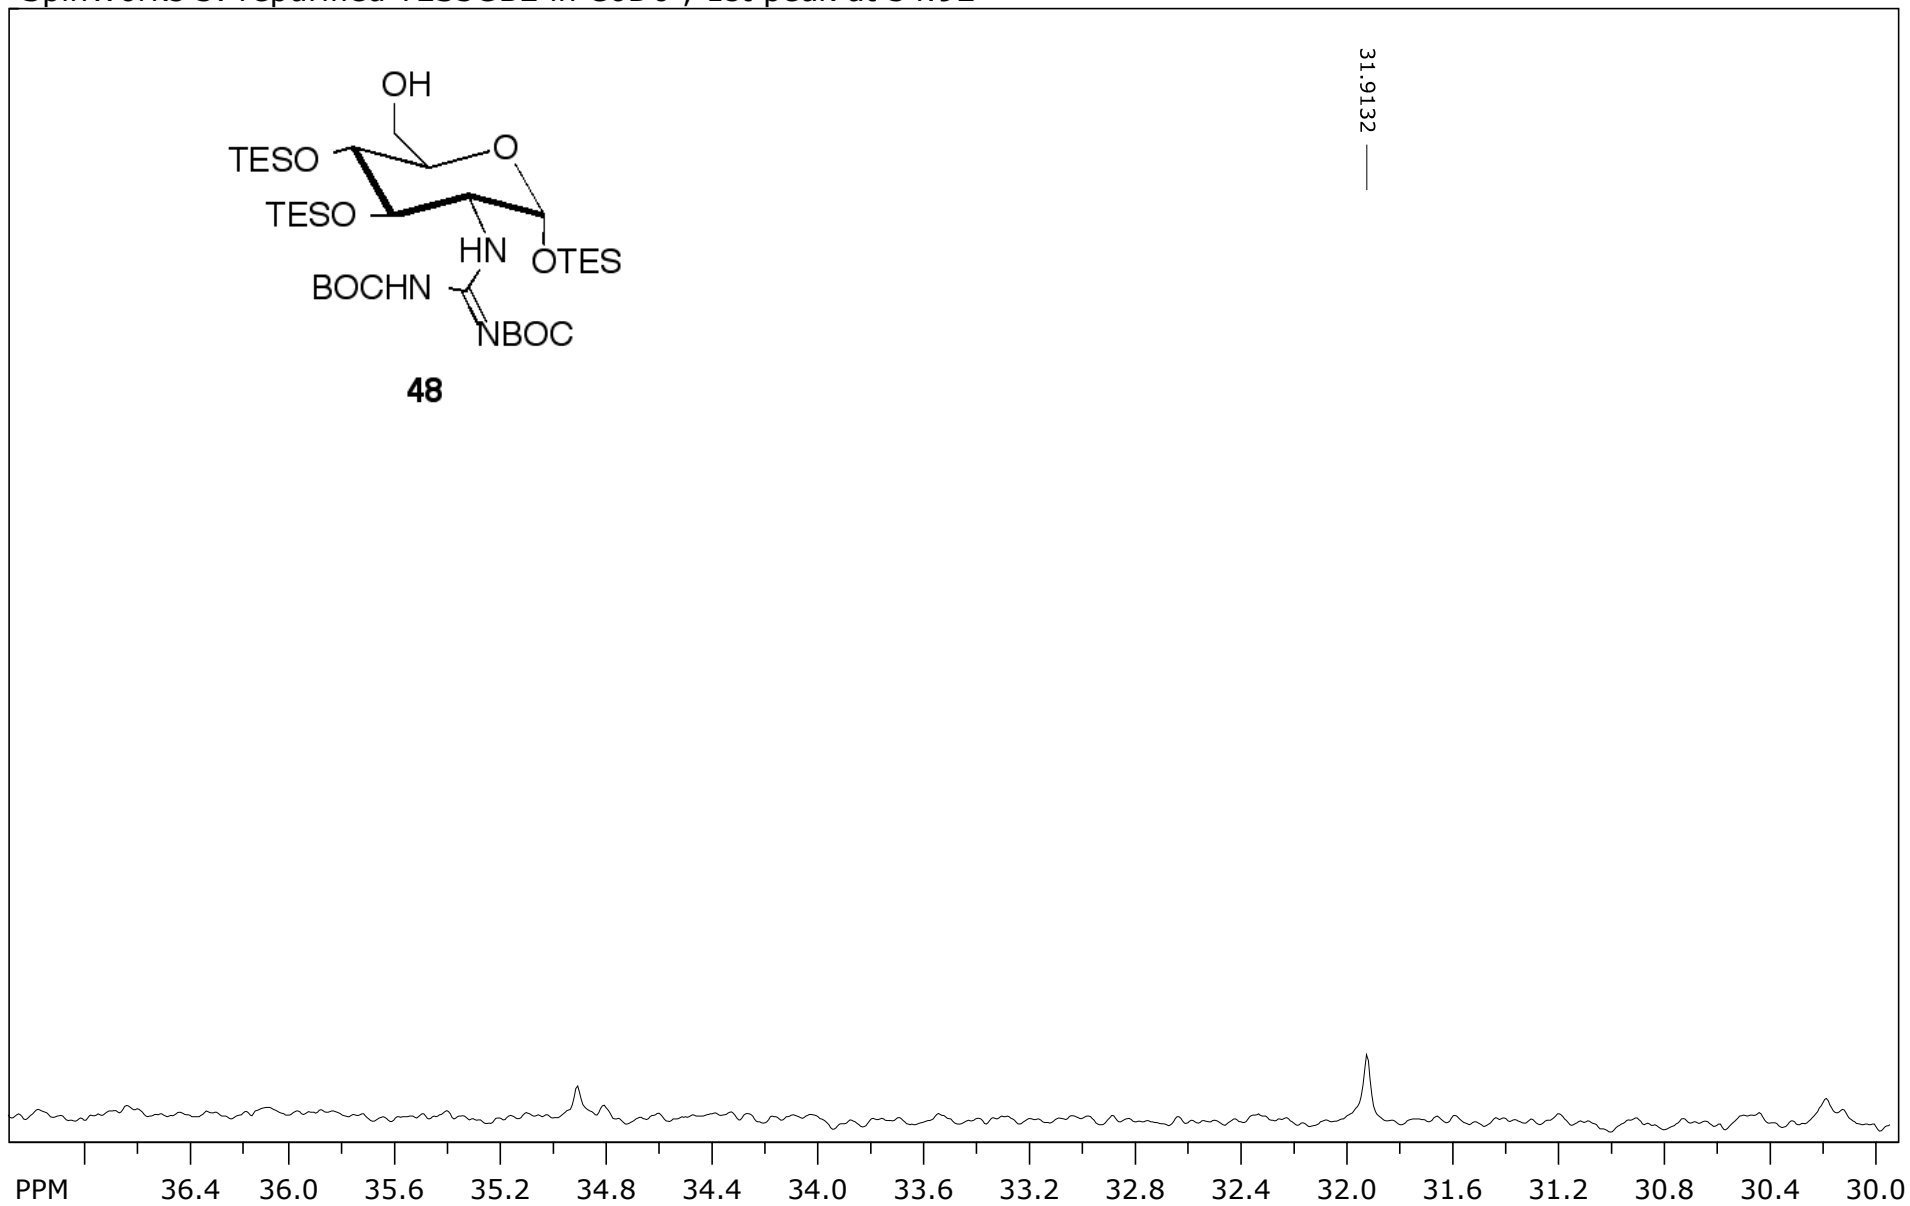

file: ...\_11\6OHTES3GB2 repur in C6D6\2\fid expt: <zggp>  
transmitter freq.: 125.699901 MHz  
time domain size: 65536 points  
width: 27777.78 Hz = 220.9849 ppm = 0.423855 Hz/pt  
number of scans: 5120

freq. of 0 ppm: 125.687357 MHz  
processed size: 32768 complex points  
LB: 3.500 GF: 0.0000  
Hz/cm: 36.079 ppm/cm: 0.28702

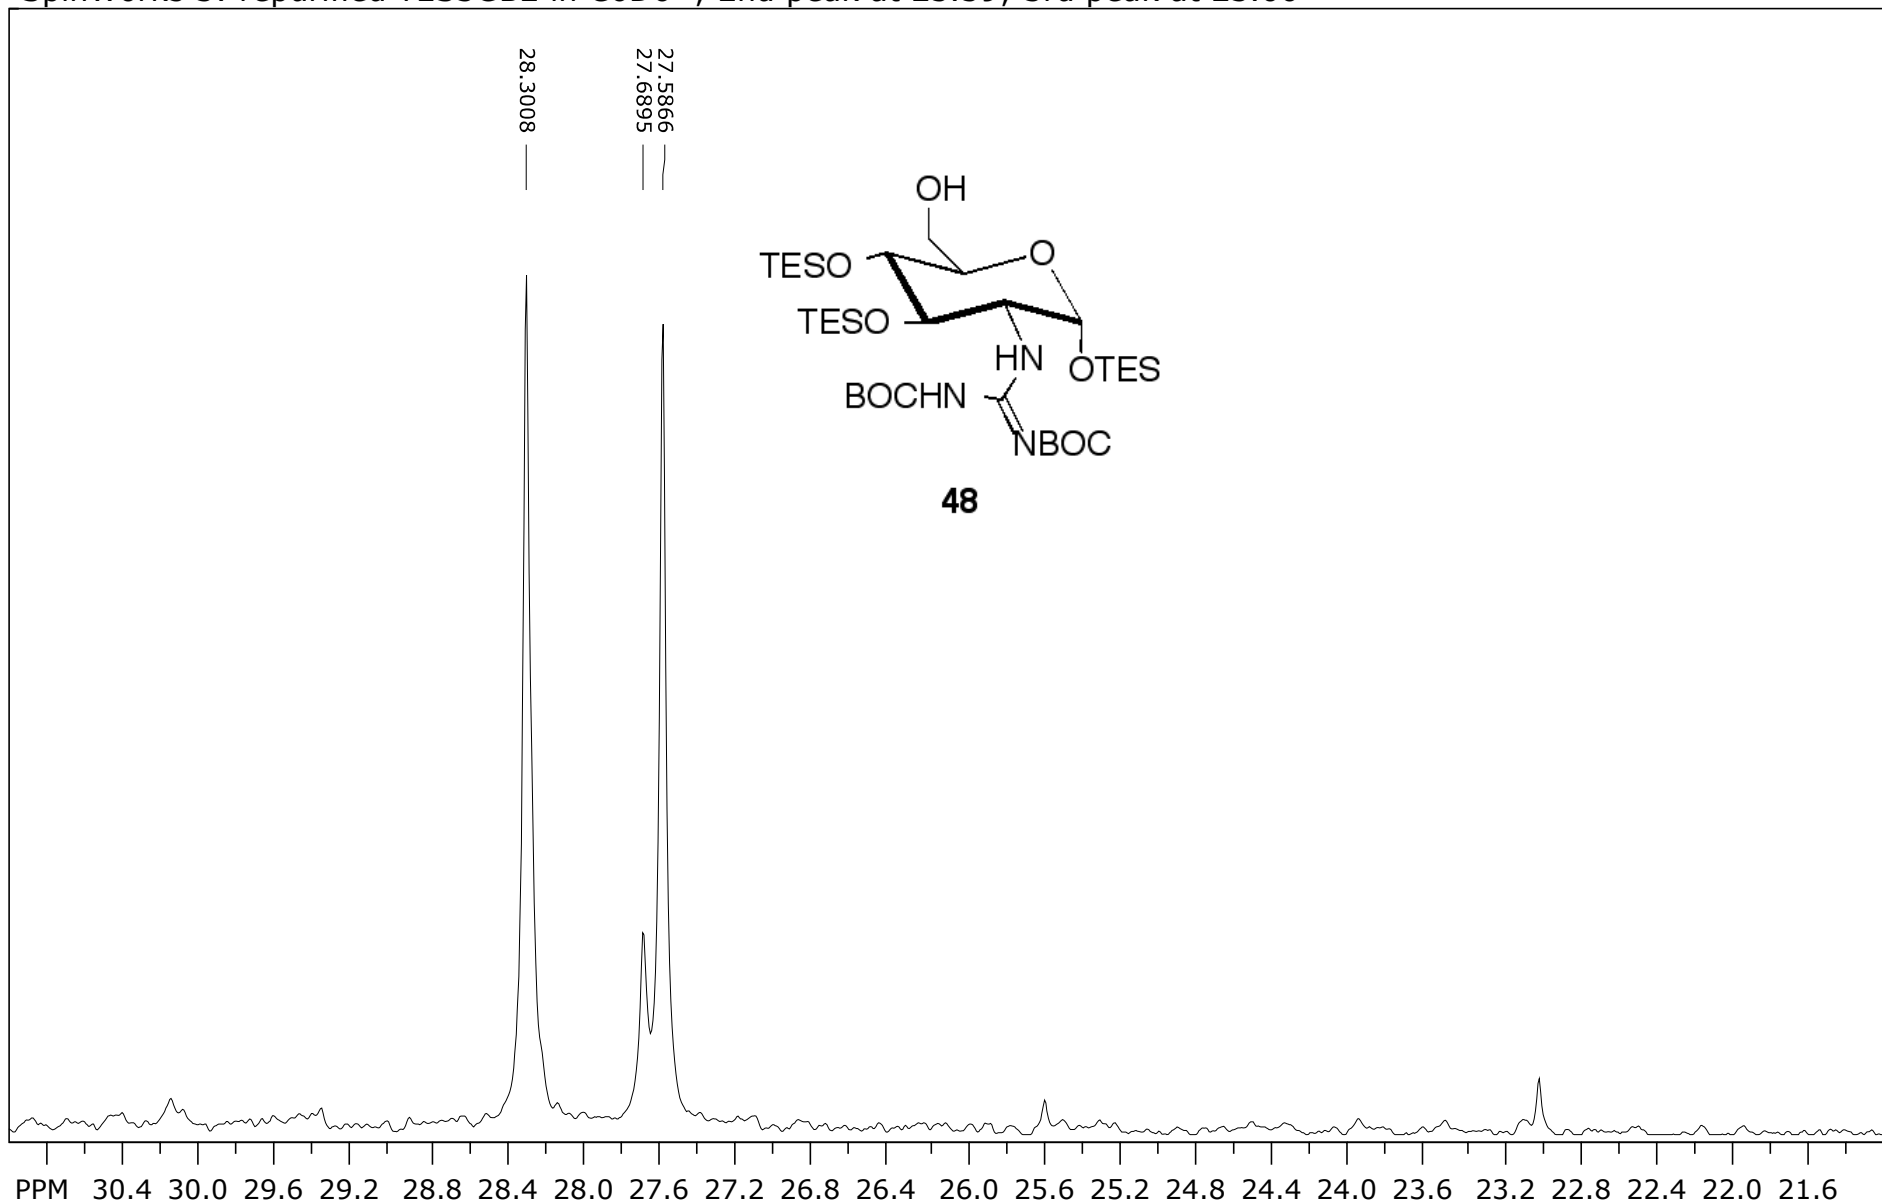

file: ...\_11\6OHOTES3GB2 repur in C6D6\2\fid expt: <zpgg>  
transmitter freq.: 125.699901 MHz  
time domain size: 65536 points  
width: 27777.78 Hz = 220.9849 ppm = 0.423855 Hz/pt  
number of scans: 5120

freq. of 0 ppm: 125.687357 MHz  
processed size: 32768 complex points  
LB: 3.500 GF: 0.0000  
Hz/cm: 49.532 ppm/cm: 0.39405

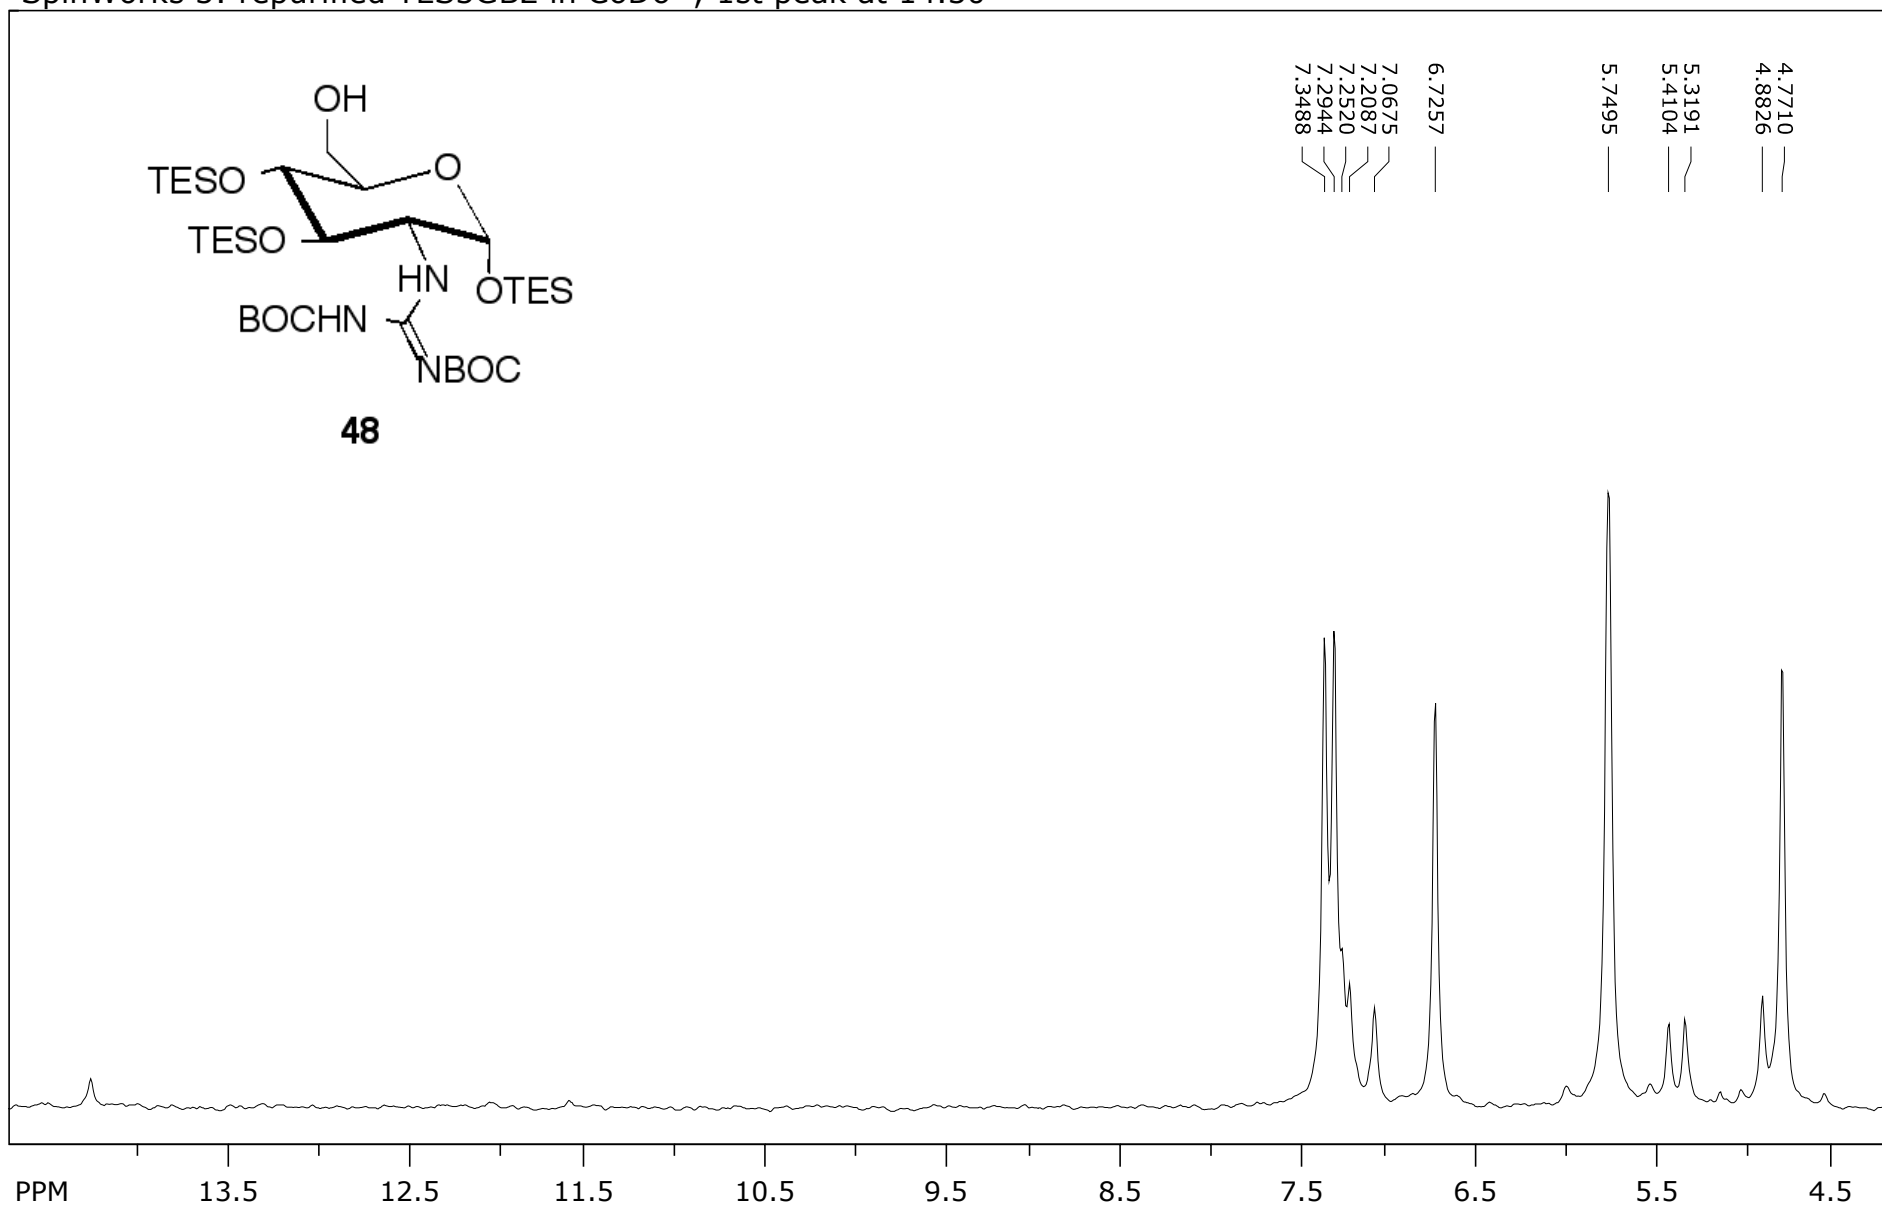

file: ...\_11\6OHTES3GB2 repur in C6D6\2\fid expt: <zpgg>  
transmitter freq.: 125.699901 MHz  
time domain size: 65536 points  
width: 27777.78 Hz = 220.9849 ppm = 0.423855 Hz/pt  
number of scans: 5120

freq. of 0 ppm: 125.687357 MHz  
processed size: 32768 complex points  
LB: 3.500 GF: 0.0000  
Hz/cm: 53.297 ppm/cm: 0.42400

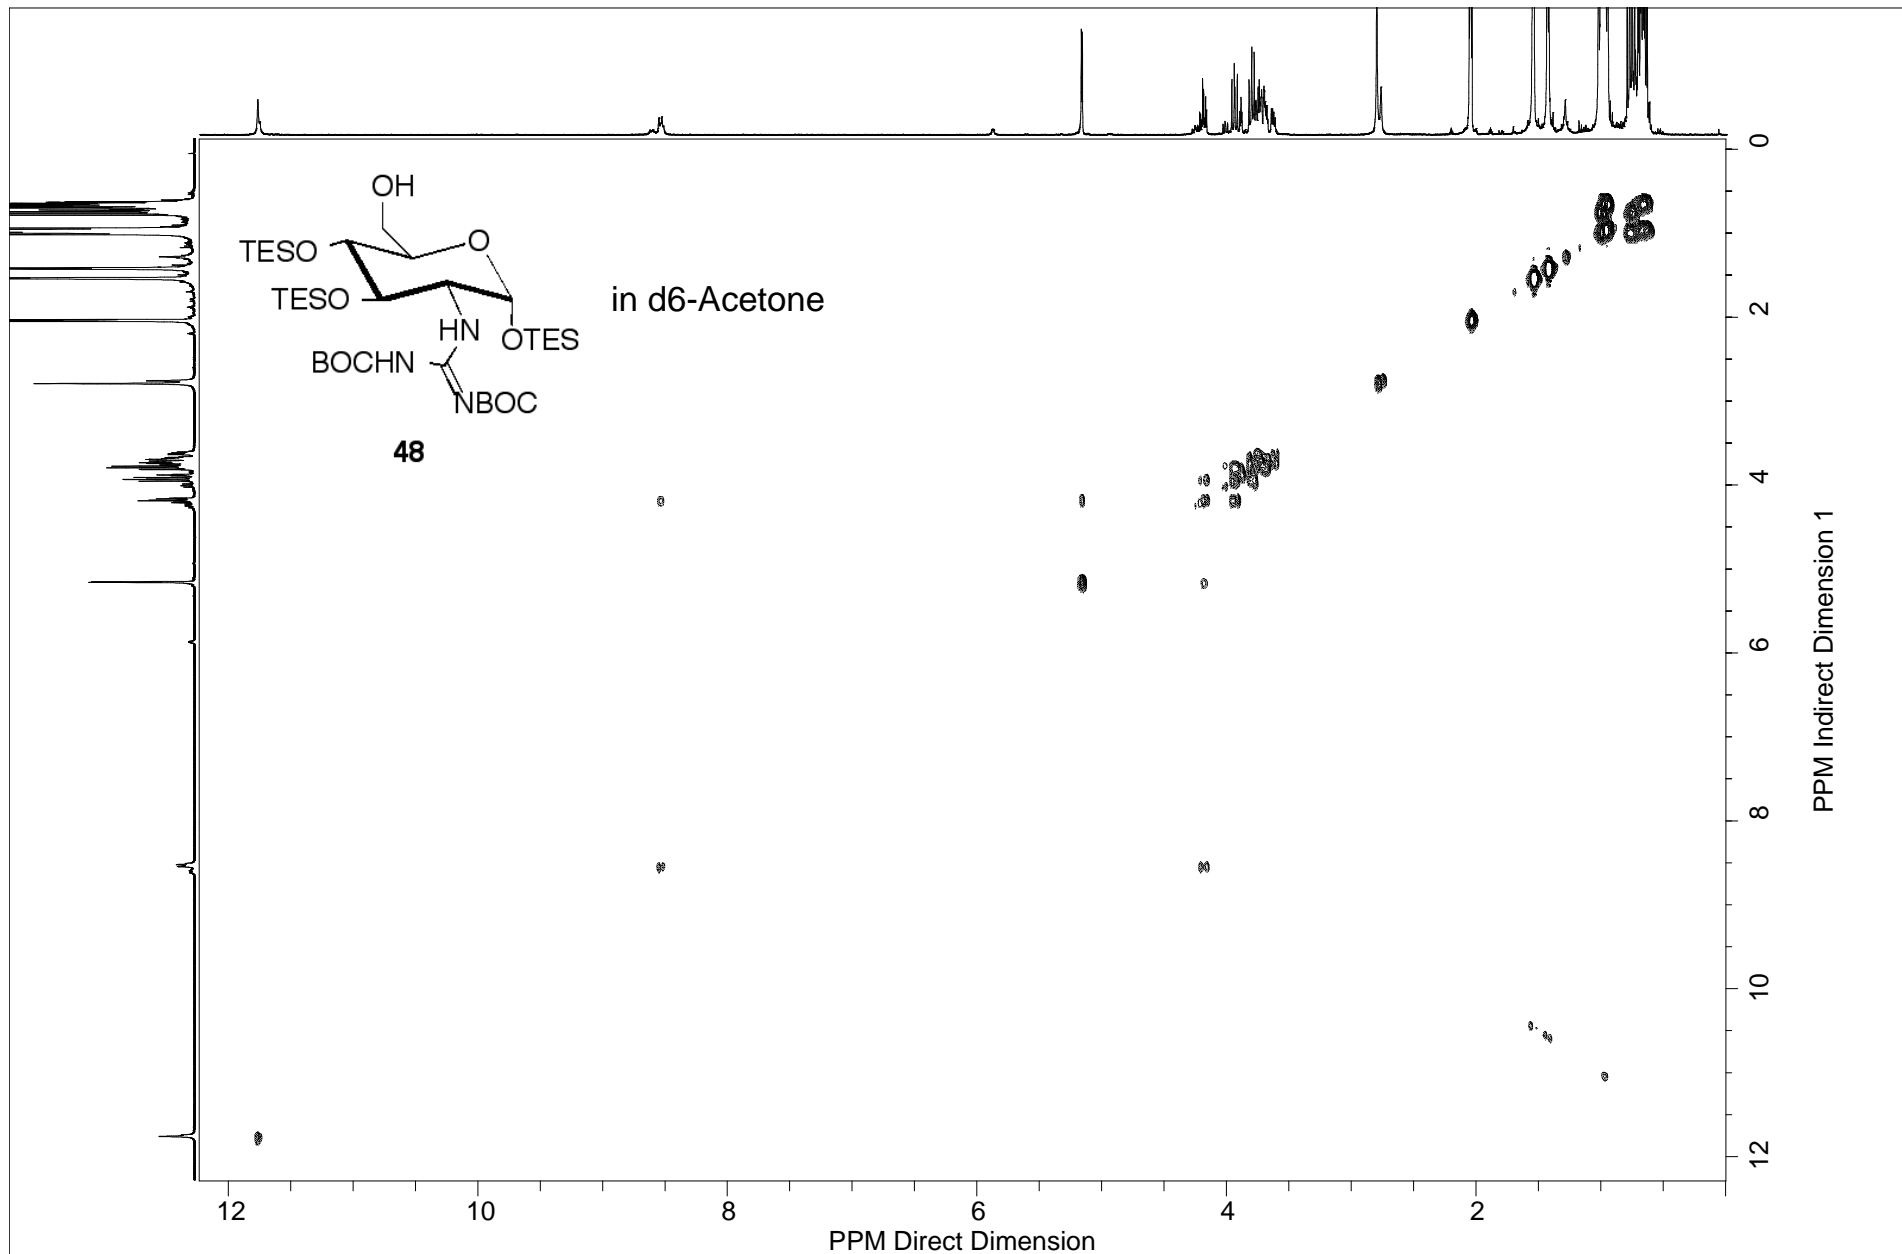

6-OH-TES3GB2\_in\_CO(CD3)2 (32993)

USER: JR -- DATE: Sep 21, 2009 18:14:58

F1: 399.785

F2: 399.785

SW1: 5597

SW2: 5597

OF1: 2398.7

OF2: 2398.7

PTS1d: 1024

1024

PTS2d: 256

512

EX: cosy\_pfg.ex2

PW: 13.9us, 90deg

PD: 2.0 sec

NA: 2

LB: 0.0

Nuts - \$\$fh090921\_COSY-2.jdf



|               |                      |             |                      |                 |              |                        |                      |
|---------------|----------------------|-------------|----------------------|-----------------|--------------|------------------------|----------------------|
| Sample Name   | Jeff 50              | Position    | Vial 50              | Instrument Name | Instrument 1 | User Name              | DYL                  |
| Inj Vol       | 1                    | InjPosition |                      | SampleType      | Unknown      | IRM Calibration Status | Success              |
| Data Filename | Direct_Vial 50_Jeff. | ACQ Method  | Direct_small mol_Jef | Comment         |              | Acquired Time          | 8/17/2012 2:29:31 PM |

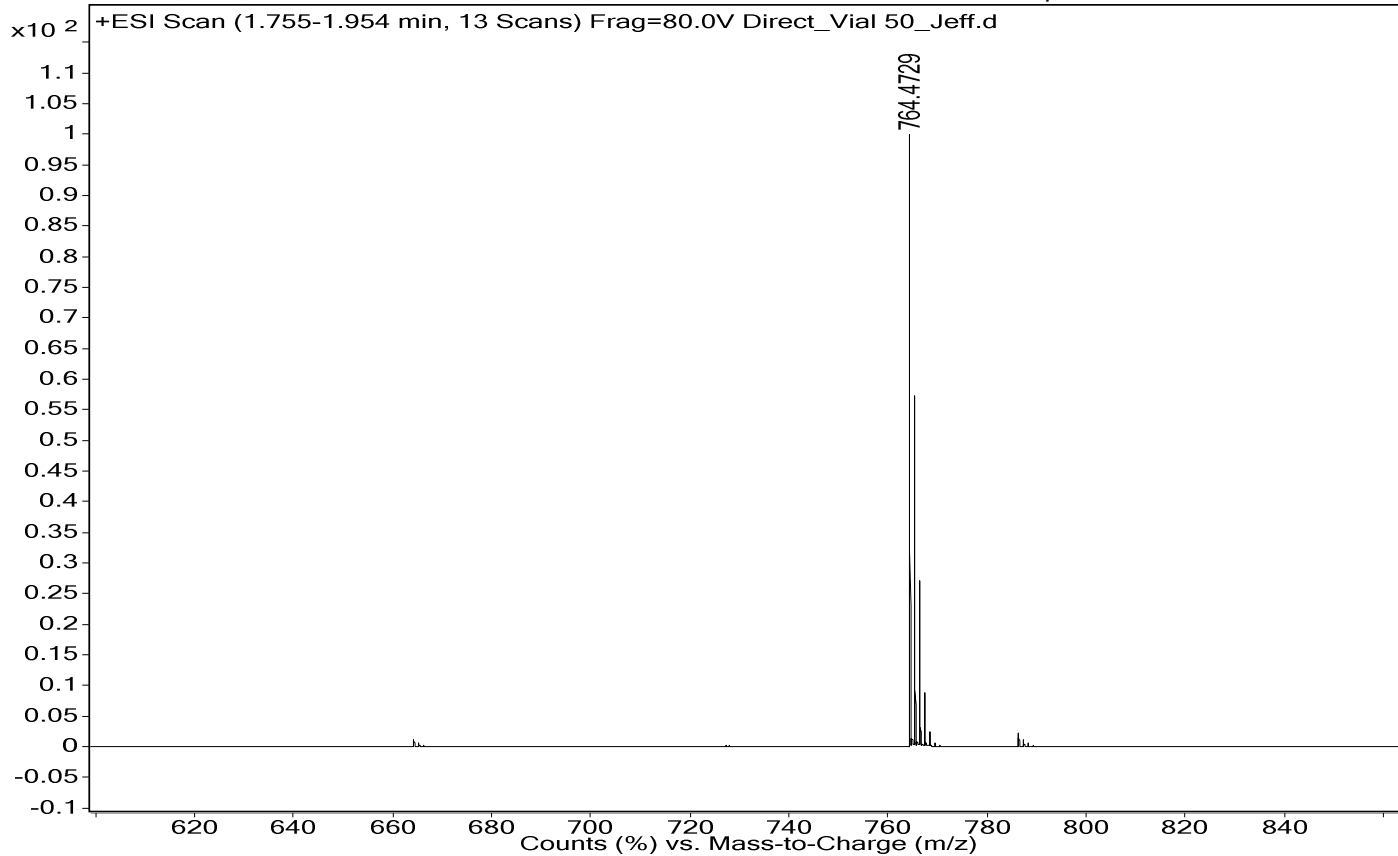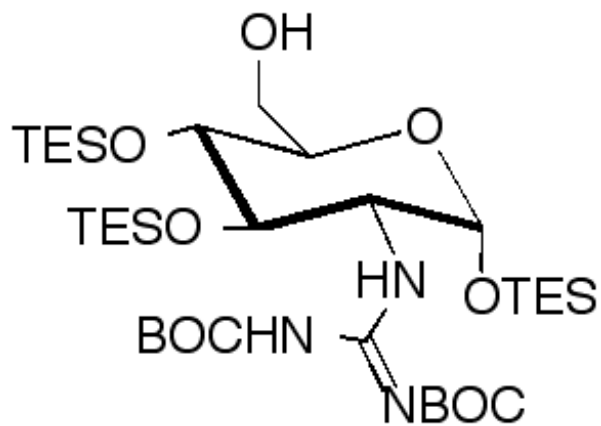

48

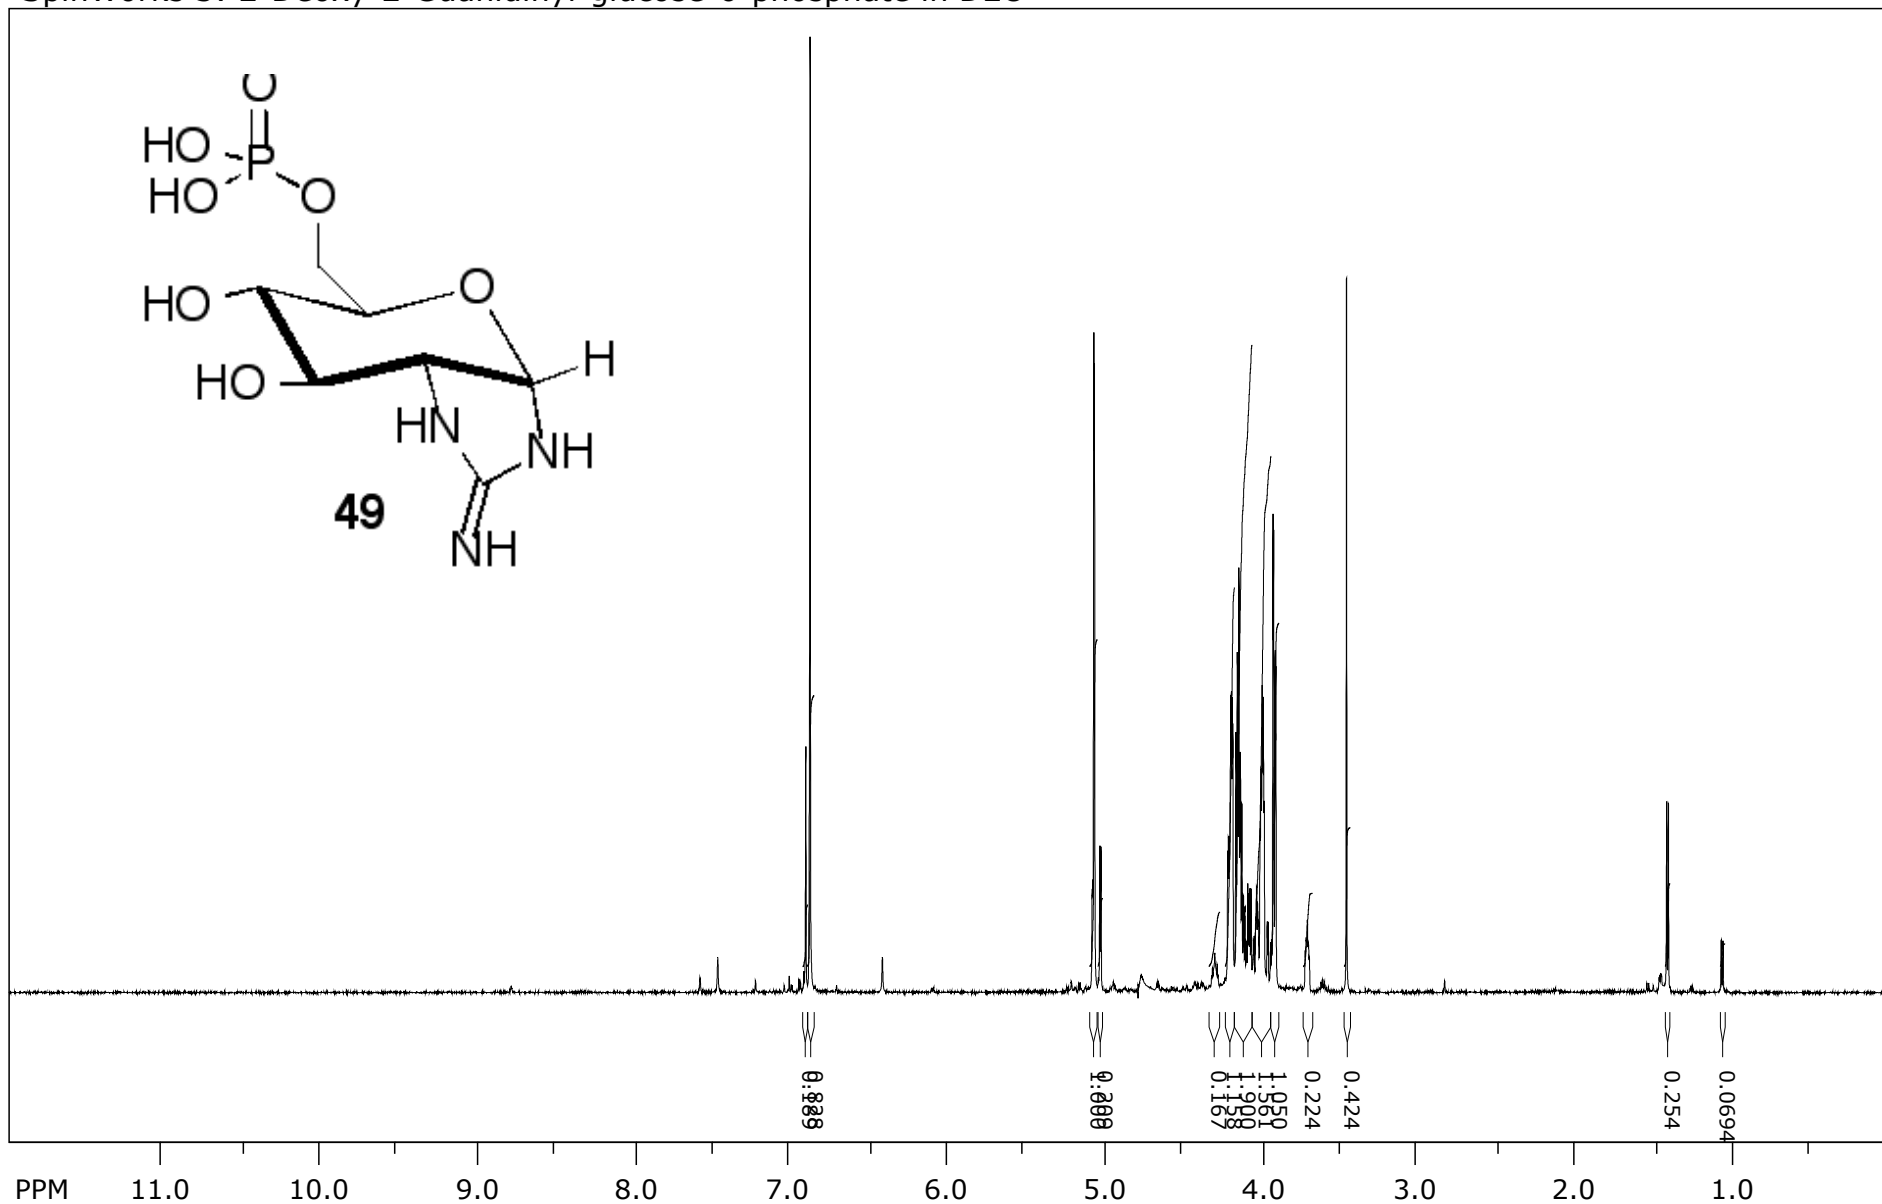

file: ...der\NMR Data\Guan6P\_finalD2O\2\fid expt: <zgr>  
transmitter freq.: 600.552832 MHz  
time domain size: 65536 points  
width: 9615.38 Hz = 16.0109 ppm = 0.146719 Hz/pt  
number of scans: 32

freq. of 0 ppm: 600.549962 MHz  
processed size: 262144 complex points  
LB: 5.000 GF: 0.0000  
Hz/cm: 289.105 ppm/cm: 0.48140

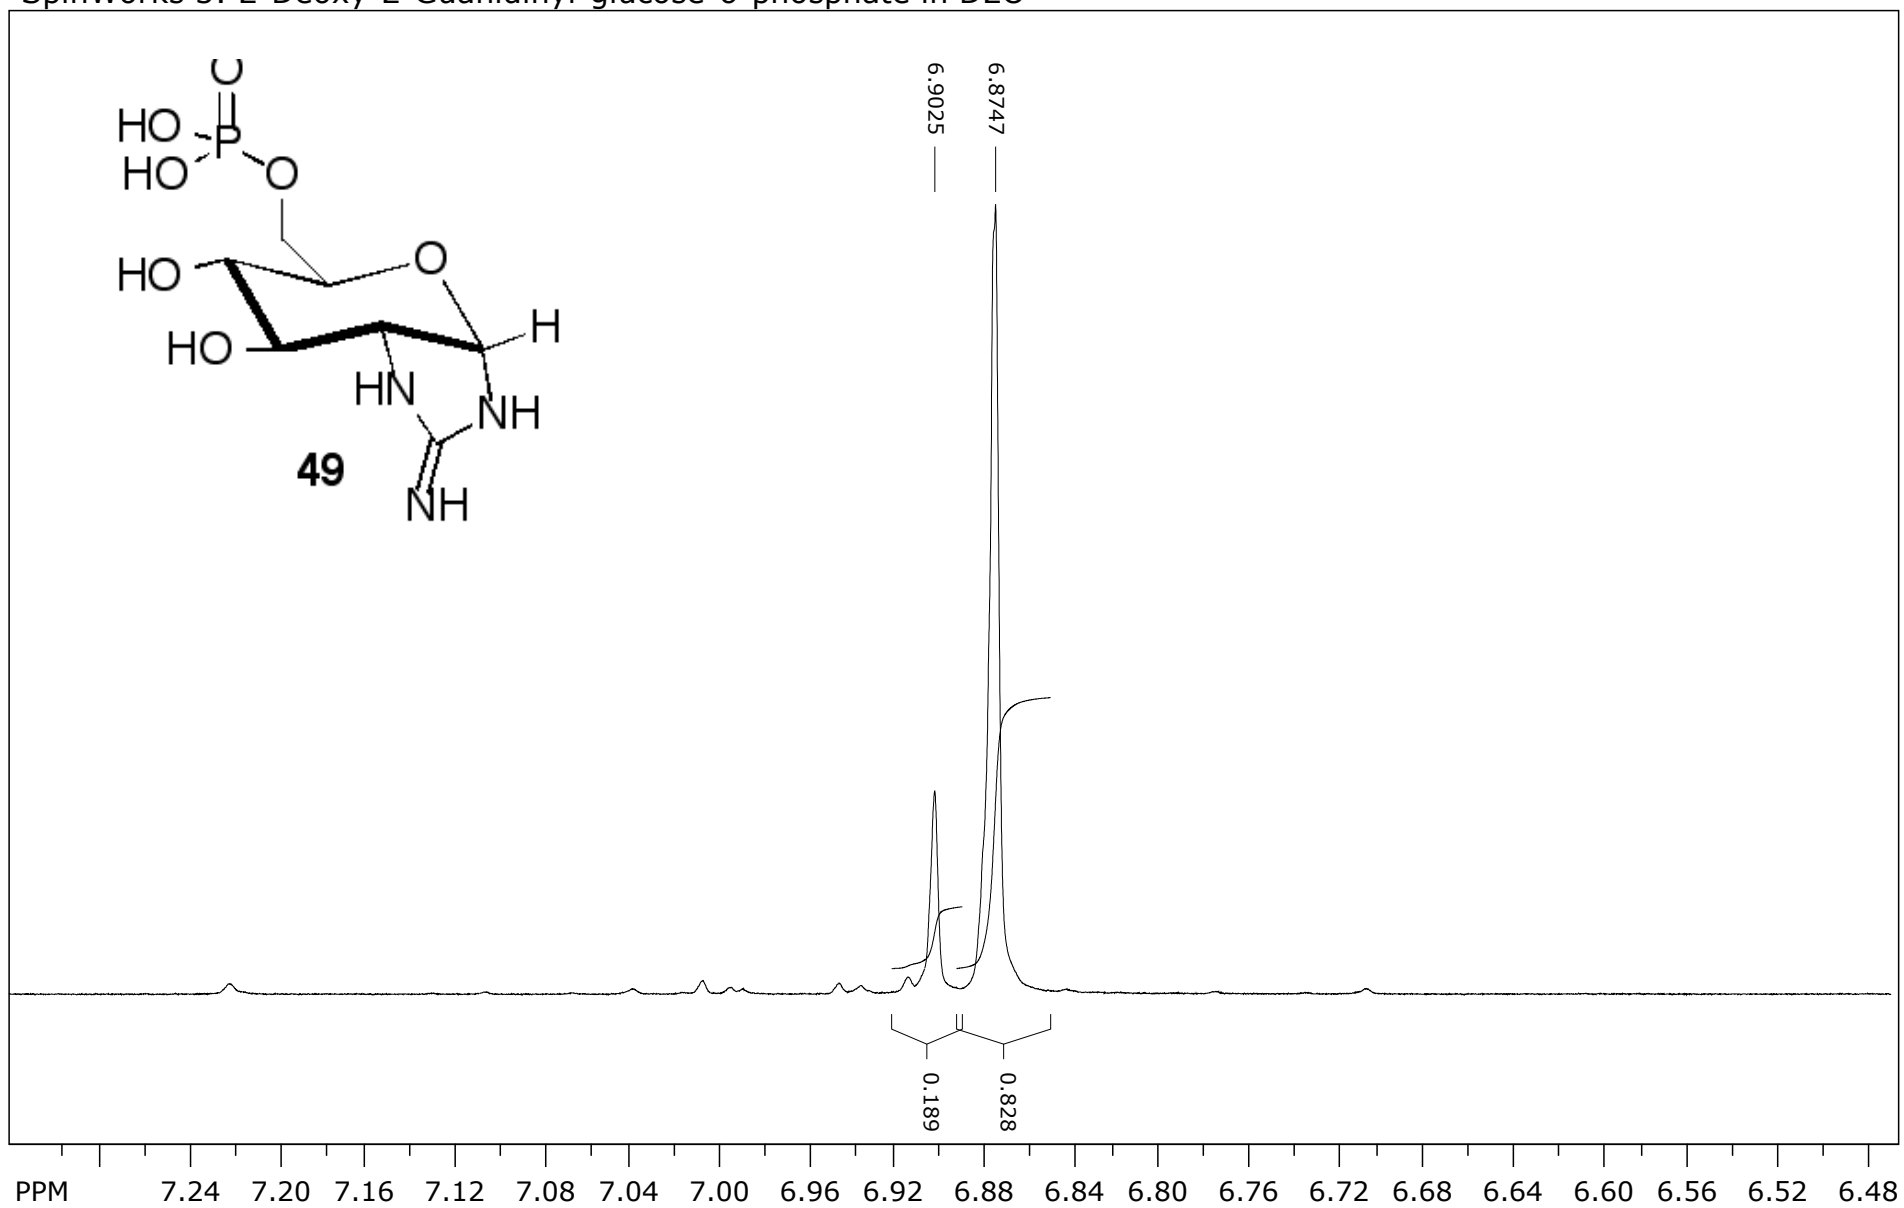

file: ...der\NMR Data\Guan6P\_finalD2O\2\fid exp: <zgpr>  
transmitter freq.: 600.552832 MHz  
time domain size: 65536 points  
width: 9615.38 Hz = 16.0109 ppm = 0.146719 Hz/pt  
number of scans: 32

freq. of 0 ppm: 600.549962 MHz  
processed size: 262144 complex points  
LB: 5.000 GF: 0.0000  
Hz/cm: 20.604 ppm/cm: 0.03431

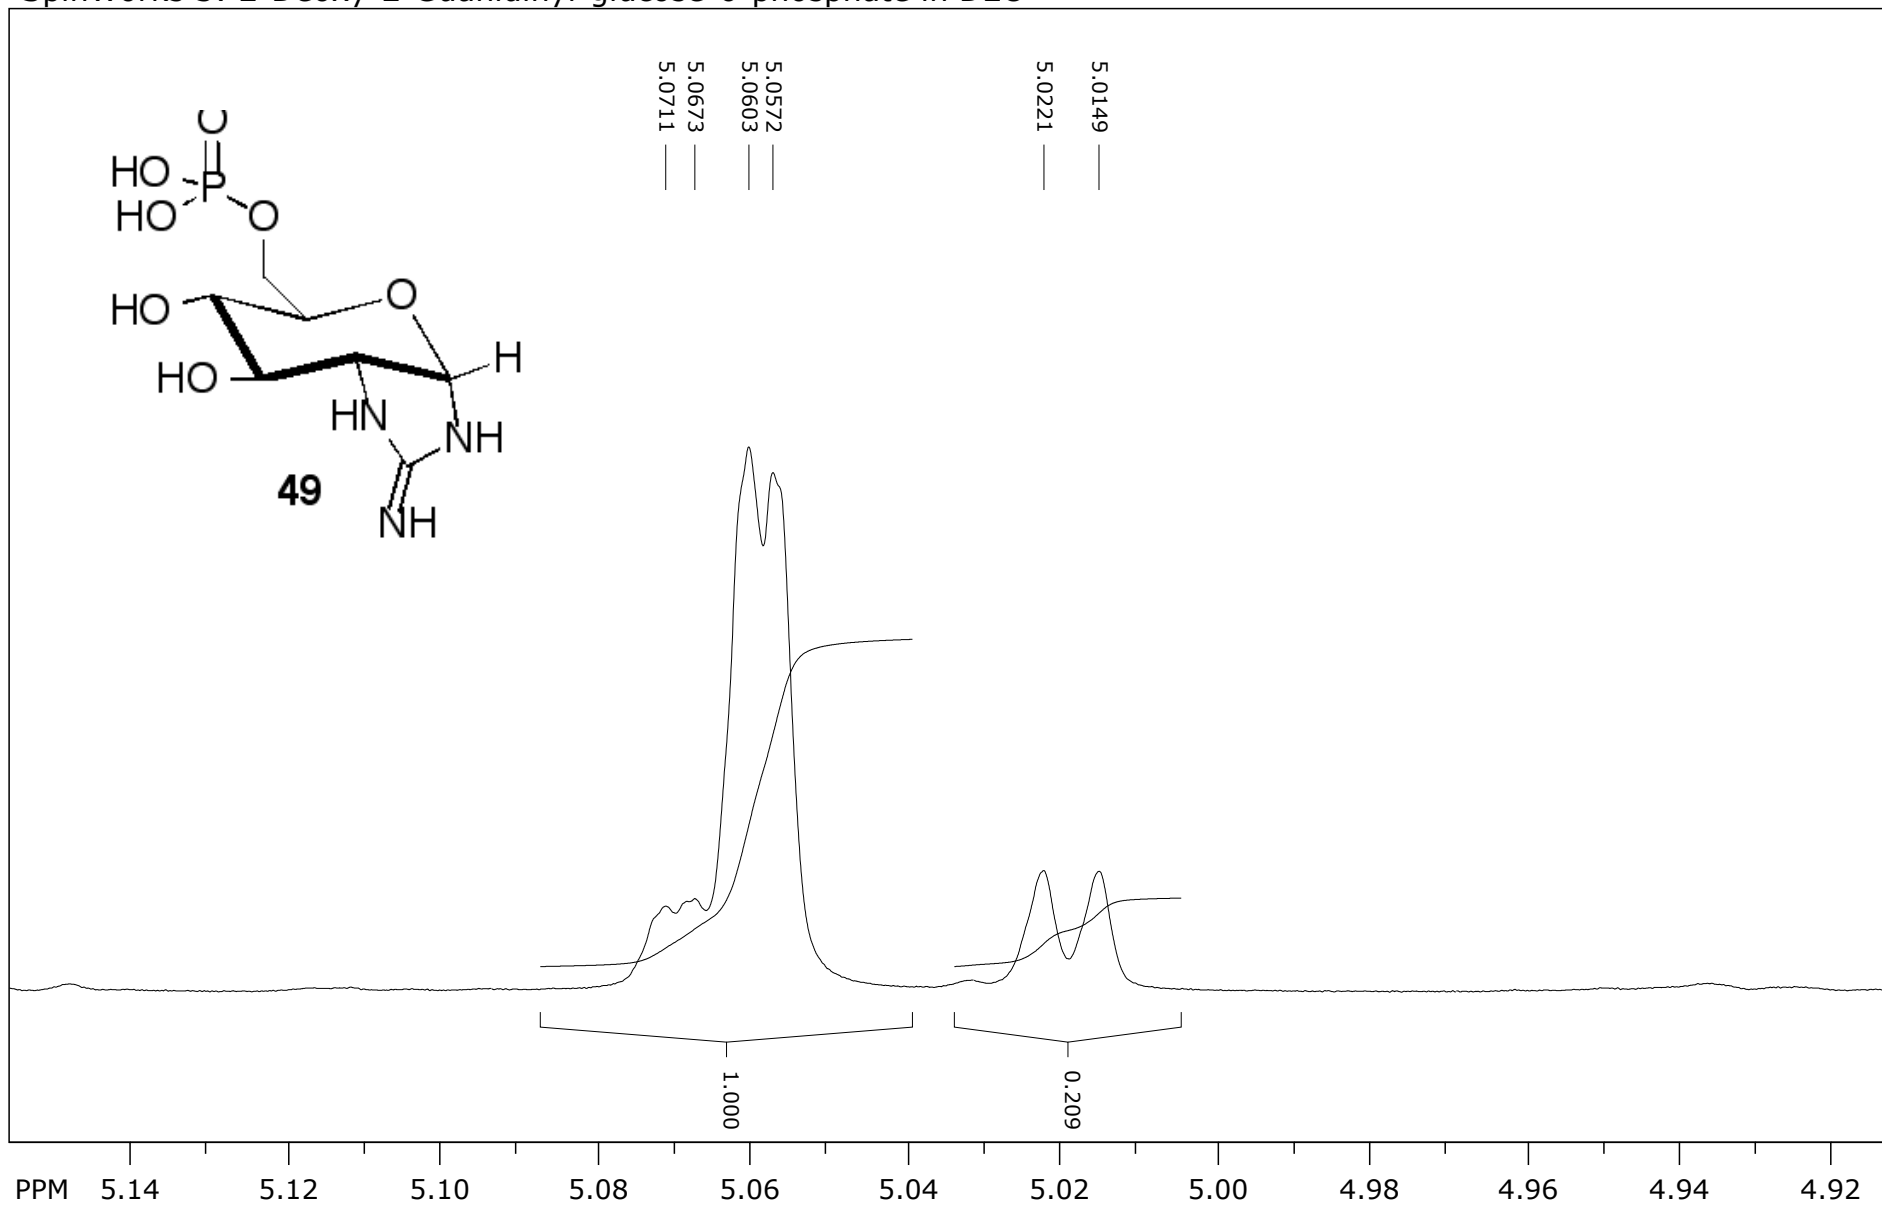

file: ...der\NMR Data\Guan6P\_finalD2O\2\fid expt: <zgpr>  
transmitter freq.: 600.552832 MHz  
time domain size: 65536 points  
width: 9615.38 Hz = 16.0109 ppm = 0.146719 Hz/pt  
number of scans: 32

freq. of 0 ppm: 600.549962 MHz  
processed size: 262144 complex points  
LB: 5.000 GF: 0.0000  
Hz/cm: 5.863 ppm/cm: 0.00976

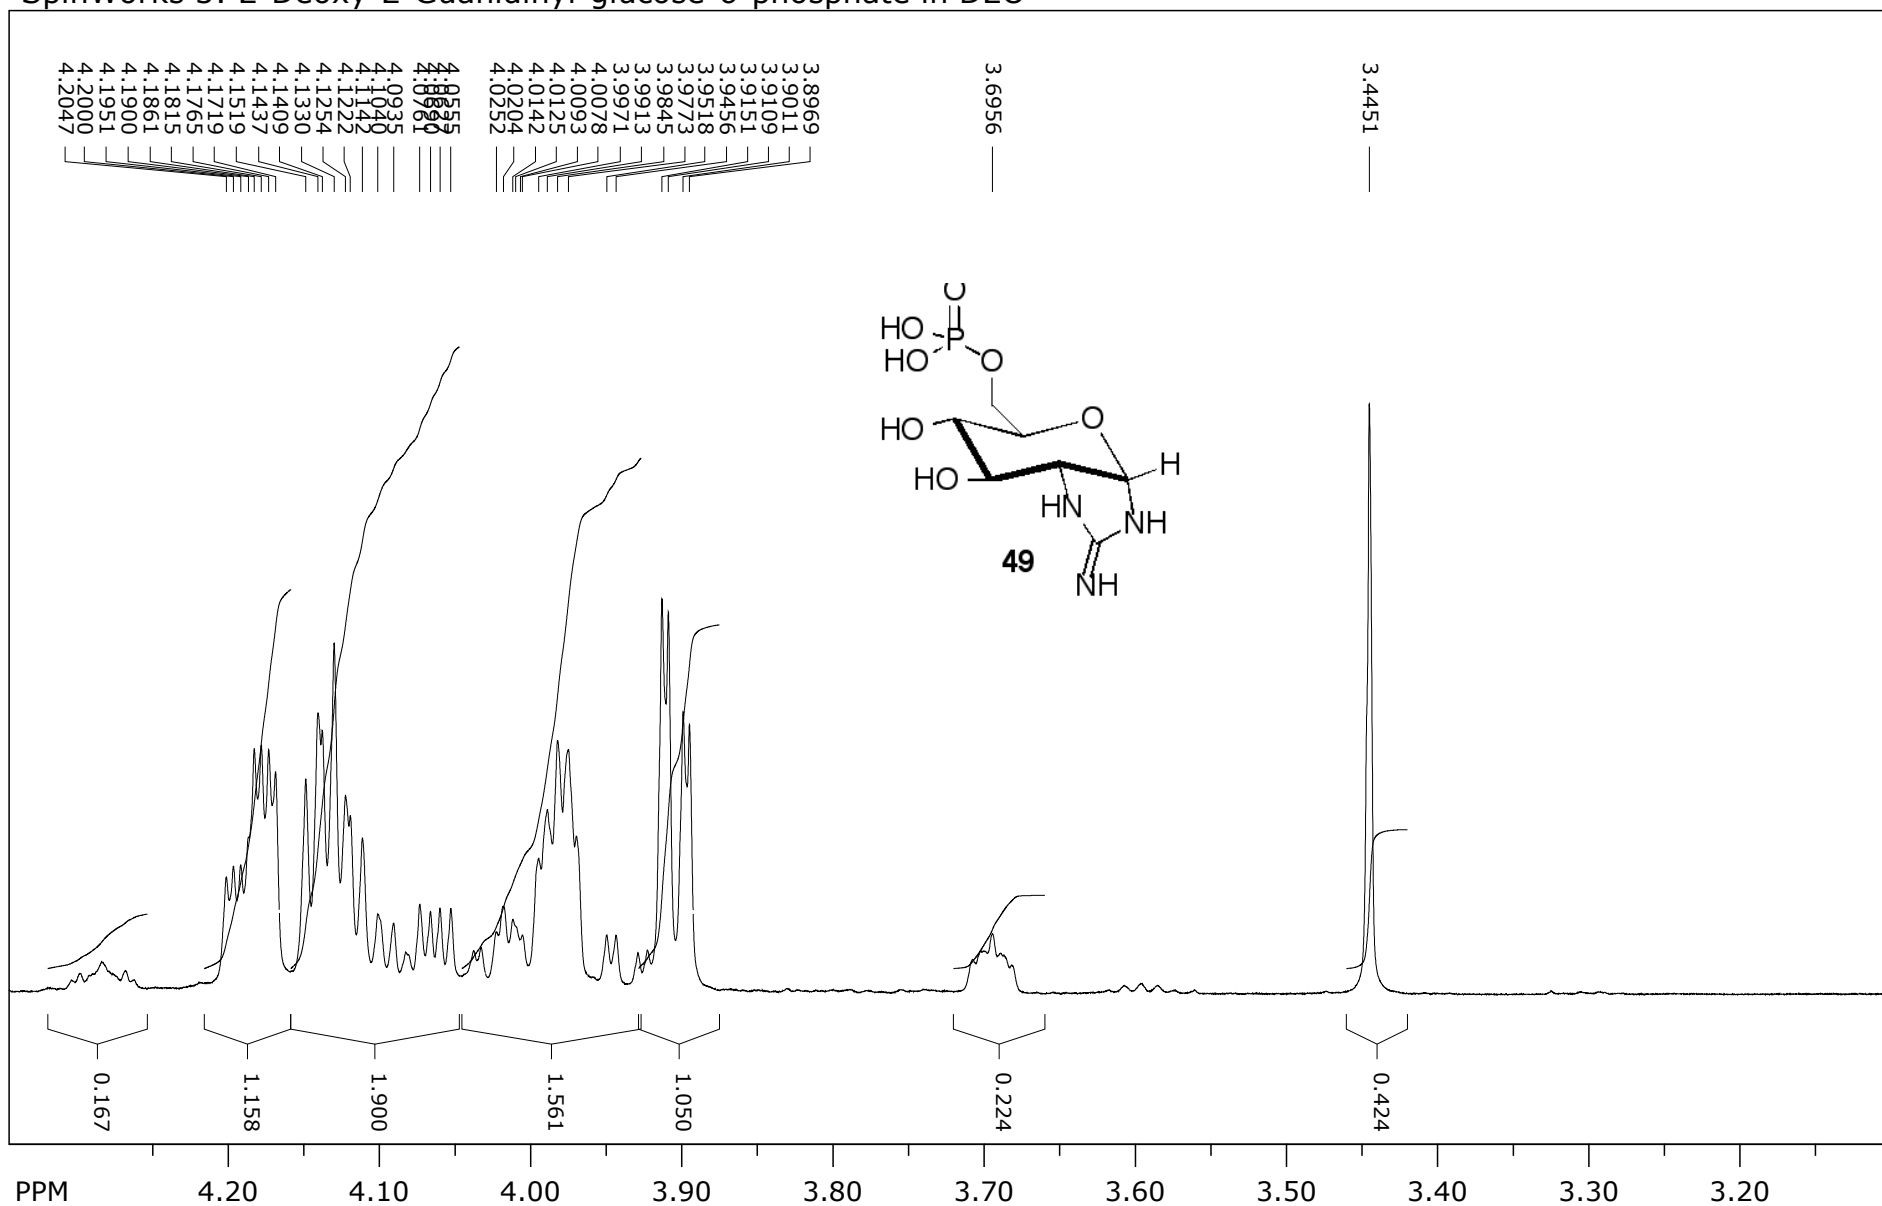

file: ...der\NMR Data\Guan6P\_finalD2O\2\fid exp: <zgpr>  
 transmitter freq.: 600.552832 MHz  
 time domain size: 65536 points  
 width: 9615.38 Hz = 16.0109 ppm = 0.146719 Hz/pt  
 number of scans: 32

freq. of 0 ppm: 600.549962 MHz  
 processed size: 262144 complex points  
 LB: 5.000 GF: 0.0000  
 Hz/cm: 30.048 ppm/cm: 0.05003

): COSYPHPR

in D2O

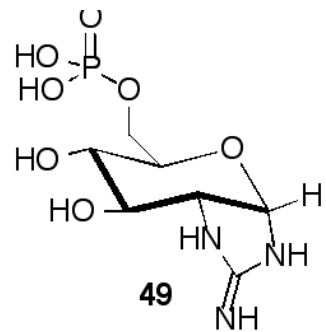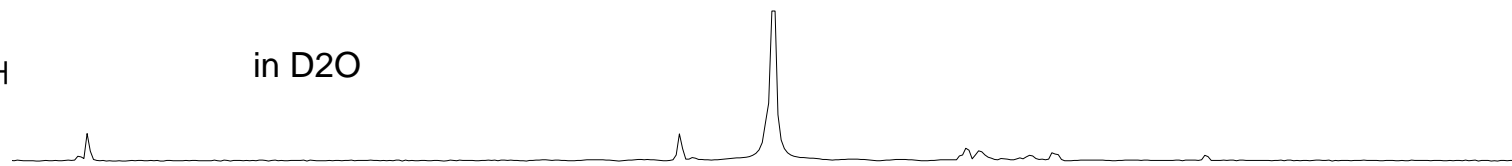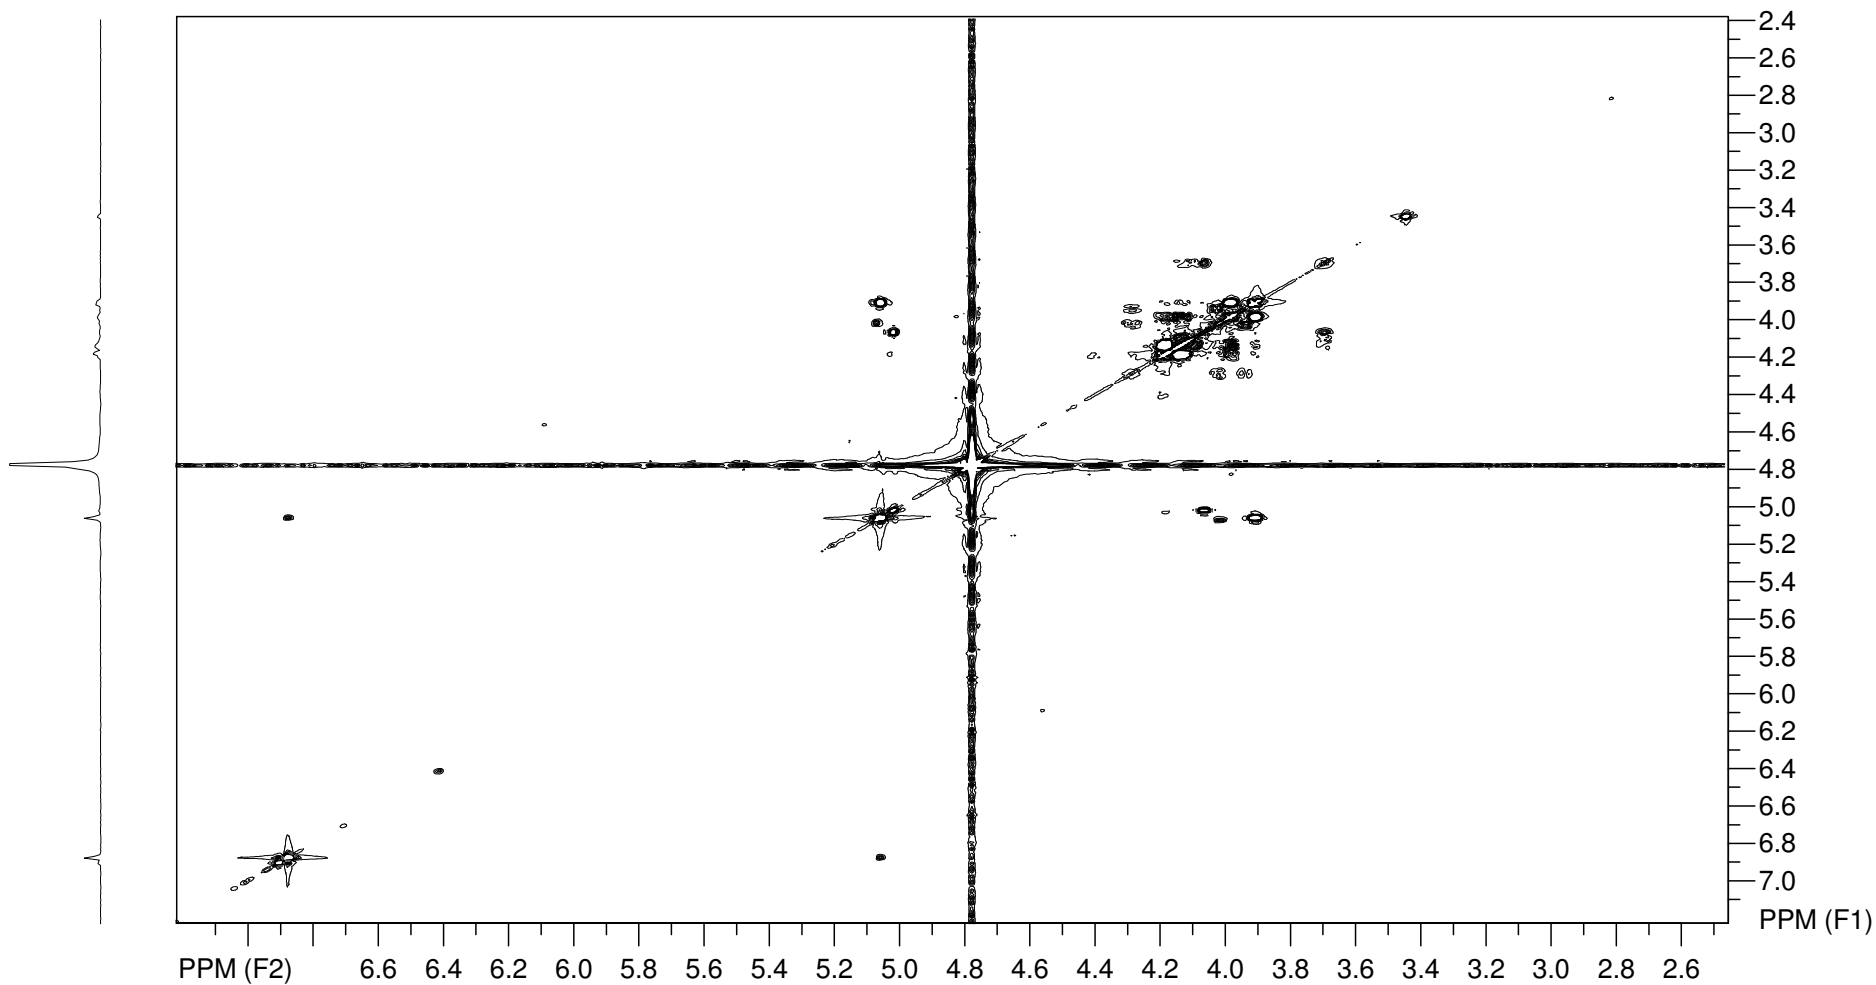

file: C:\Users\Jeff\Documents\NMR Folder\NMR Data\Guan6PCOSY9\_21\_2\ser exp: <cosygpqf>  
 transmitter freq.: 600.553566 MHz  
 time domain size: 2048 by 2048 points  
 width (F2): 6009.58 Hz = 10.006793 ppm = 2.934365 Hz/pt  
 number of scans: 1

F2: freq. of 0 ppm: 600.549962 MHz  
 processed size: 1024 complex points  
 window function: Sine  
 shift: 0.0 degrees  
 Hz/cm: 139.532 ppm/cm: 0.23234

F1: freq. of 0 ppm: 600.549962 MHz  
 processed size: 1024 complex points  
 window function: Sine  
 shift: 0.0 degrees  
 Hz/cm: 242.633 ppm/cm: 0.40402

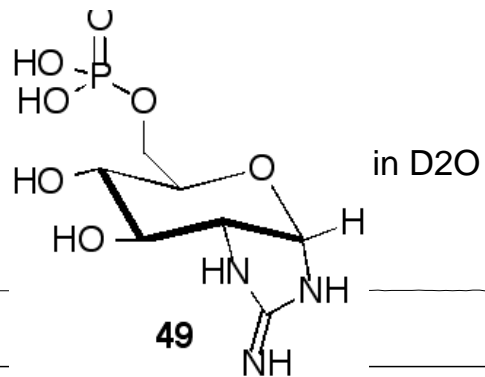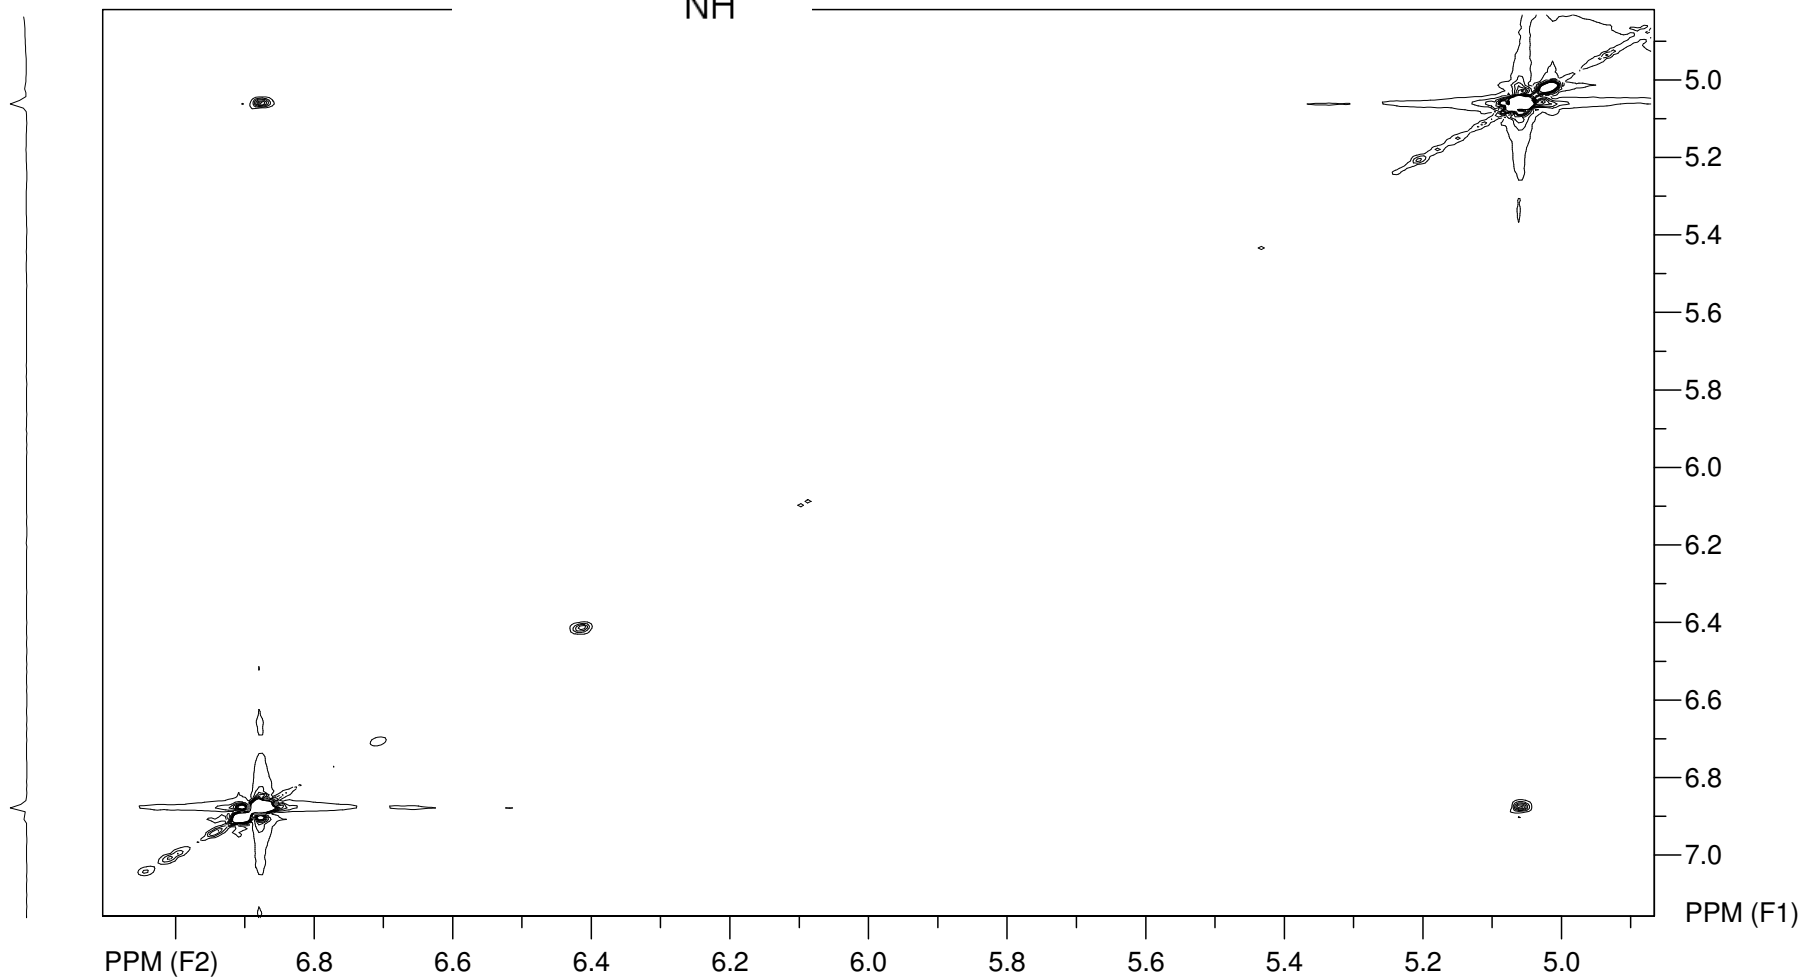

file: C:\Users\Jeff\Documents\NMR Folder\NMR Data\Guan6PCOSY9\_21\_2\ser exp: <cosygpqf>  
 transmitter freq.: 600.553566 MHz  
 time domain size: 2048 by 2048 points  
 width (F2): 6009.58 Hz = 10.006793 ppm = 2.934365 Hz/pt  
 number of scans: 1

F2: freq. of 0 ppm: 600.549962 MHz  
 processed size: 1024 complex points  
 window function: Sine  
 shift: 0.0 degrees  
 Hz/cm: 65.595 ppm/cm: 0.10922

F1: freq. of 0 ppm: 600.549962 MHz  
 processed size: 1024 complex points  
 window function: Sine  
 shift: 0.0 degrees  
 Hz/cm: 117.093 ppm/cm: 0.19498

## 2-Deoxy-2-Guanidinyglucose-6-phosphate in D2O

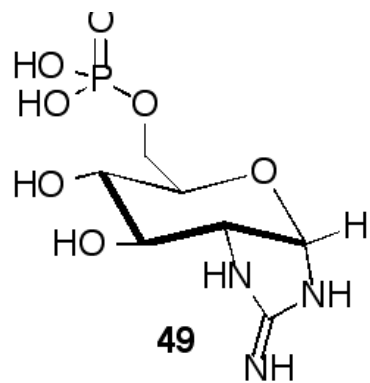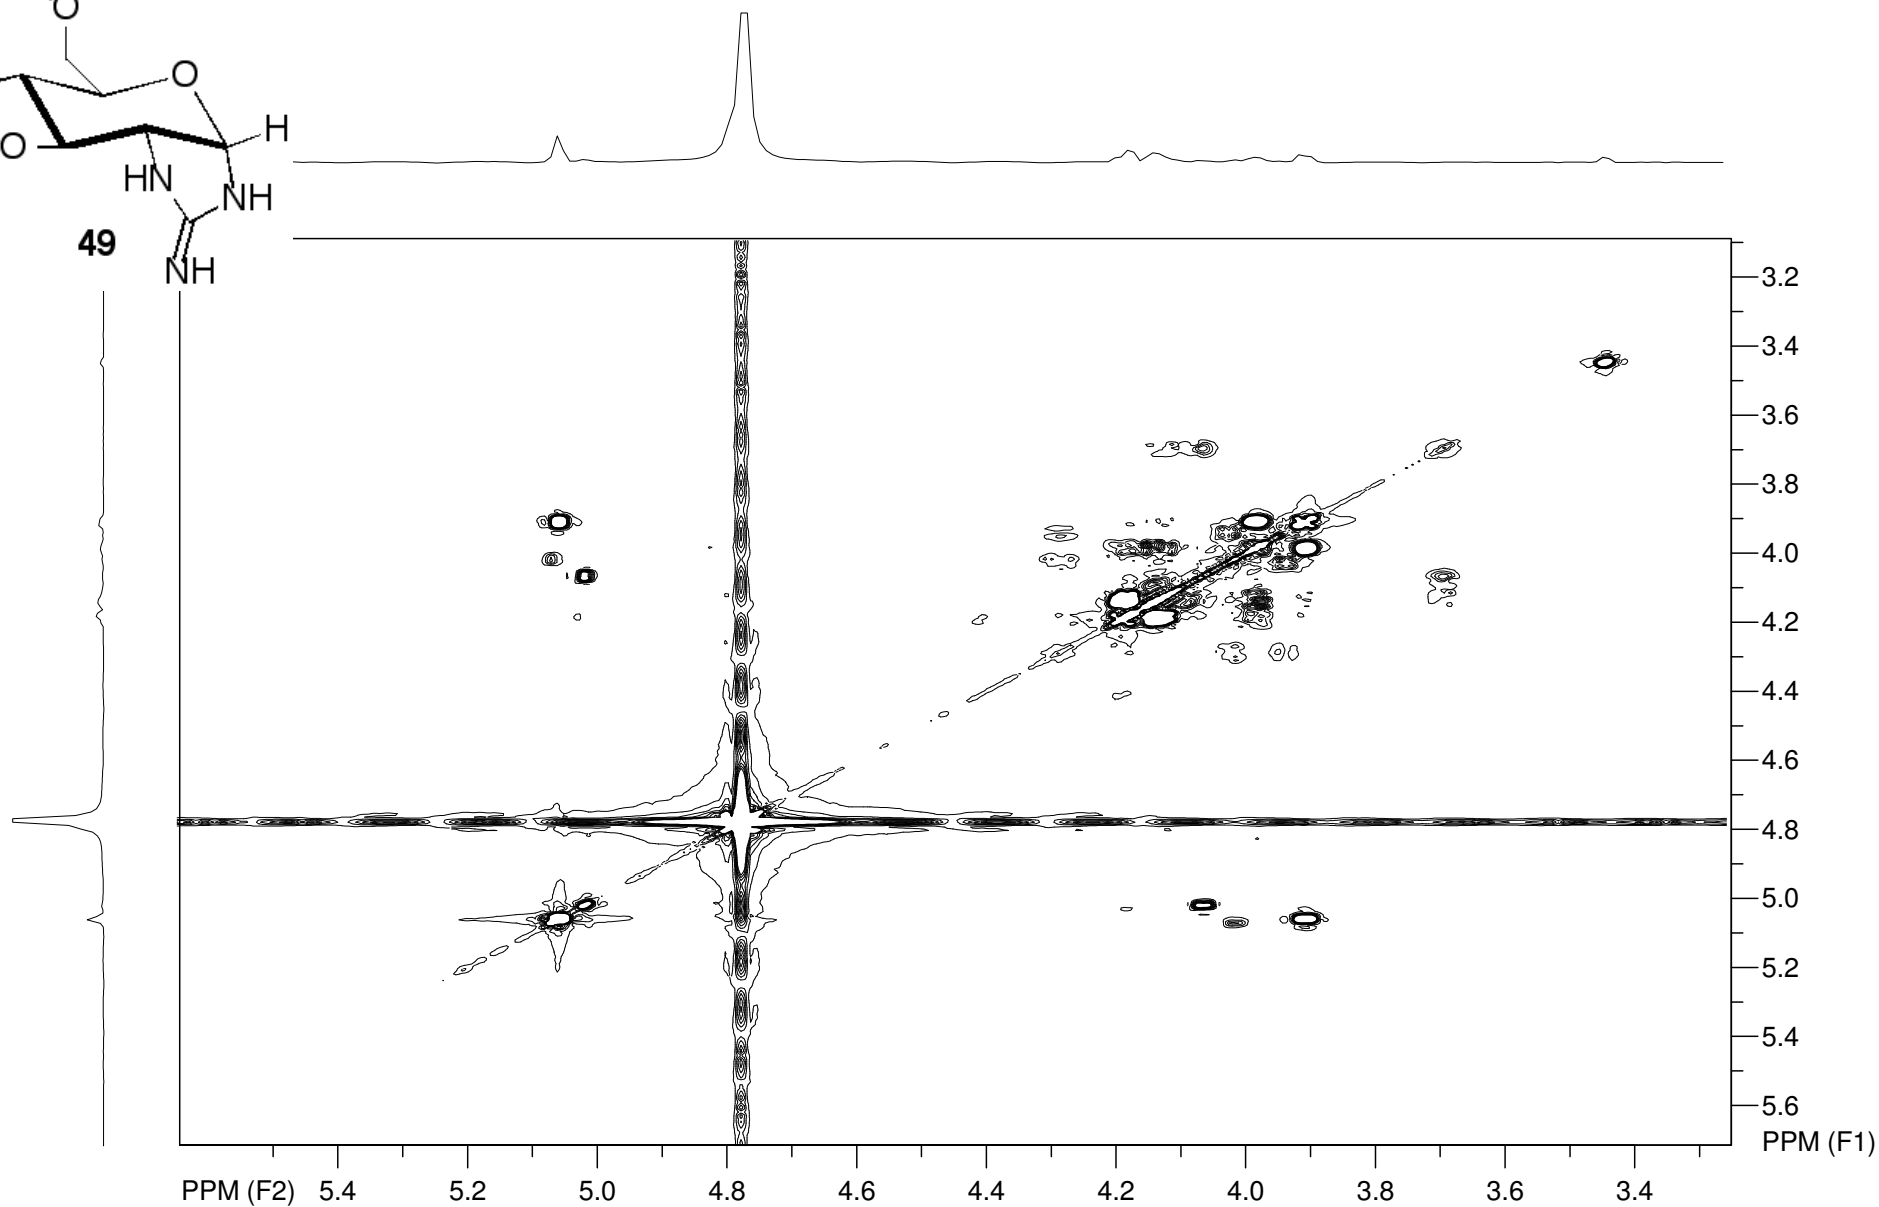

file: C:\Users\Jeff\Documents\NMR Folder\NMR Data\Guan6PCOSY9\_21\2\ser exp: <cosygpqf>  
 transmitter freq.: 600.553566 MHz  
 time domain size: 2048 by 2048 points  
 width (F2): 6009.58 Hz = 10.006793 ppm = 2.934365 Hz/pt  
 number of scans: 1

F2: freq. of 0 ppm: 600.549962 MHz  
 processed size: 1024 complex points  
 window function: Sine  
 shift: 0.0 degrees  
 Hz/cm: 70.106 ppm/cm: 0.11673

F1: freq. of 0 ppm: 600.549962 MHz  
 processed size: 1024 complex points  
 window function: Sine  
 shift: 0.0 degrees  
 Hz/cm: 131.450 ppm/cm: 0.21888



# 2-Deoxy-2-guanidiny-6-phosphate sample in D2O DEPTQ analysis

S-323

| Parameter                 | Value                                         |
|---------------------------|-----------------------------------------------|
| 1 Comment                 | deptqgsp @310.2K<br>NS=25k                    |
| 2 Origin                  | Bruker BioSpin GmbH                           |
| 3 Solvent                 | D2O                                           |
| 4 Temperature             | 310.2                                         |
| 5 Pulse Sequence          | deptqgsp                                      |
| 6 Experiment              | 1D                                            |
| 7 Probe                   | 5 mm TXI D/ 1H-13C/ 15N<br>XYZ-GRD Z8323/ 138 |
| 8 Number of Scans         | 25600                                         |
| 9 Receiver Gain           | 512                                           |
| 10 Relaxation Delay       | 1.5000                                        |
| 11 Pulse Width            | 12.1200                                       |
| 12 Acquisition Time       | 0.9088                                        |
| 13 Acquisition Date       | 2012-09-25T11:21:22                           |
| 14 Spectrometer Frequency | 151.02                                        |
| 15 Spectral Width         | 36057.7                                       |
| 16 Lowest Frequency       | -2512.9                                       |
| 17 Nucleus                | 13C                                           |
| 18 Acquired Size          | 32768                                         |
| 19 Spectral Size          | 65536                                         |

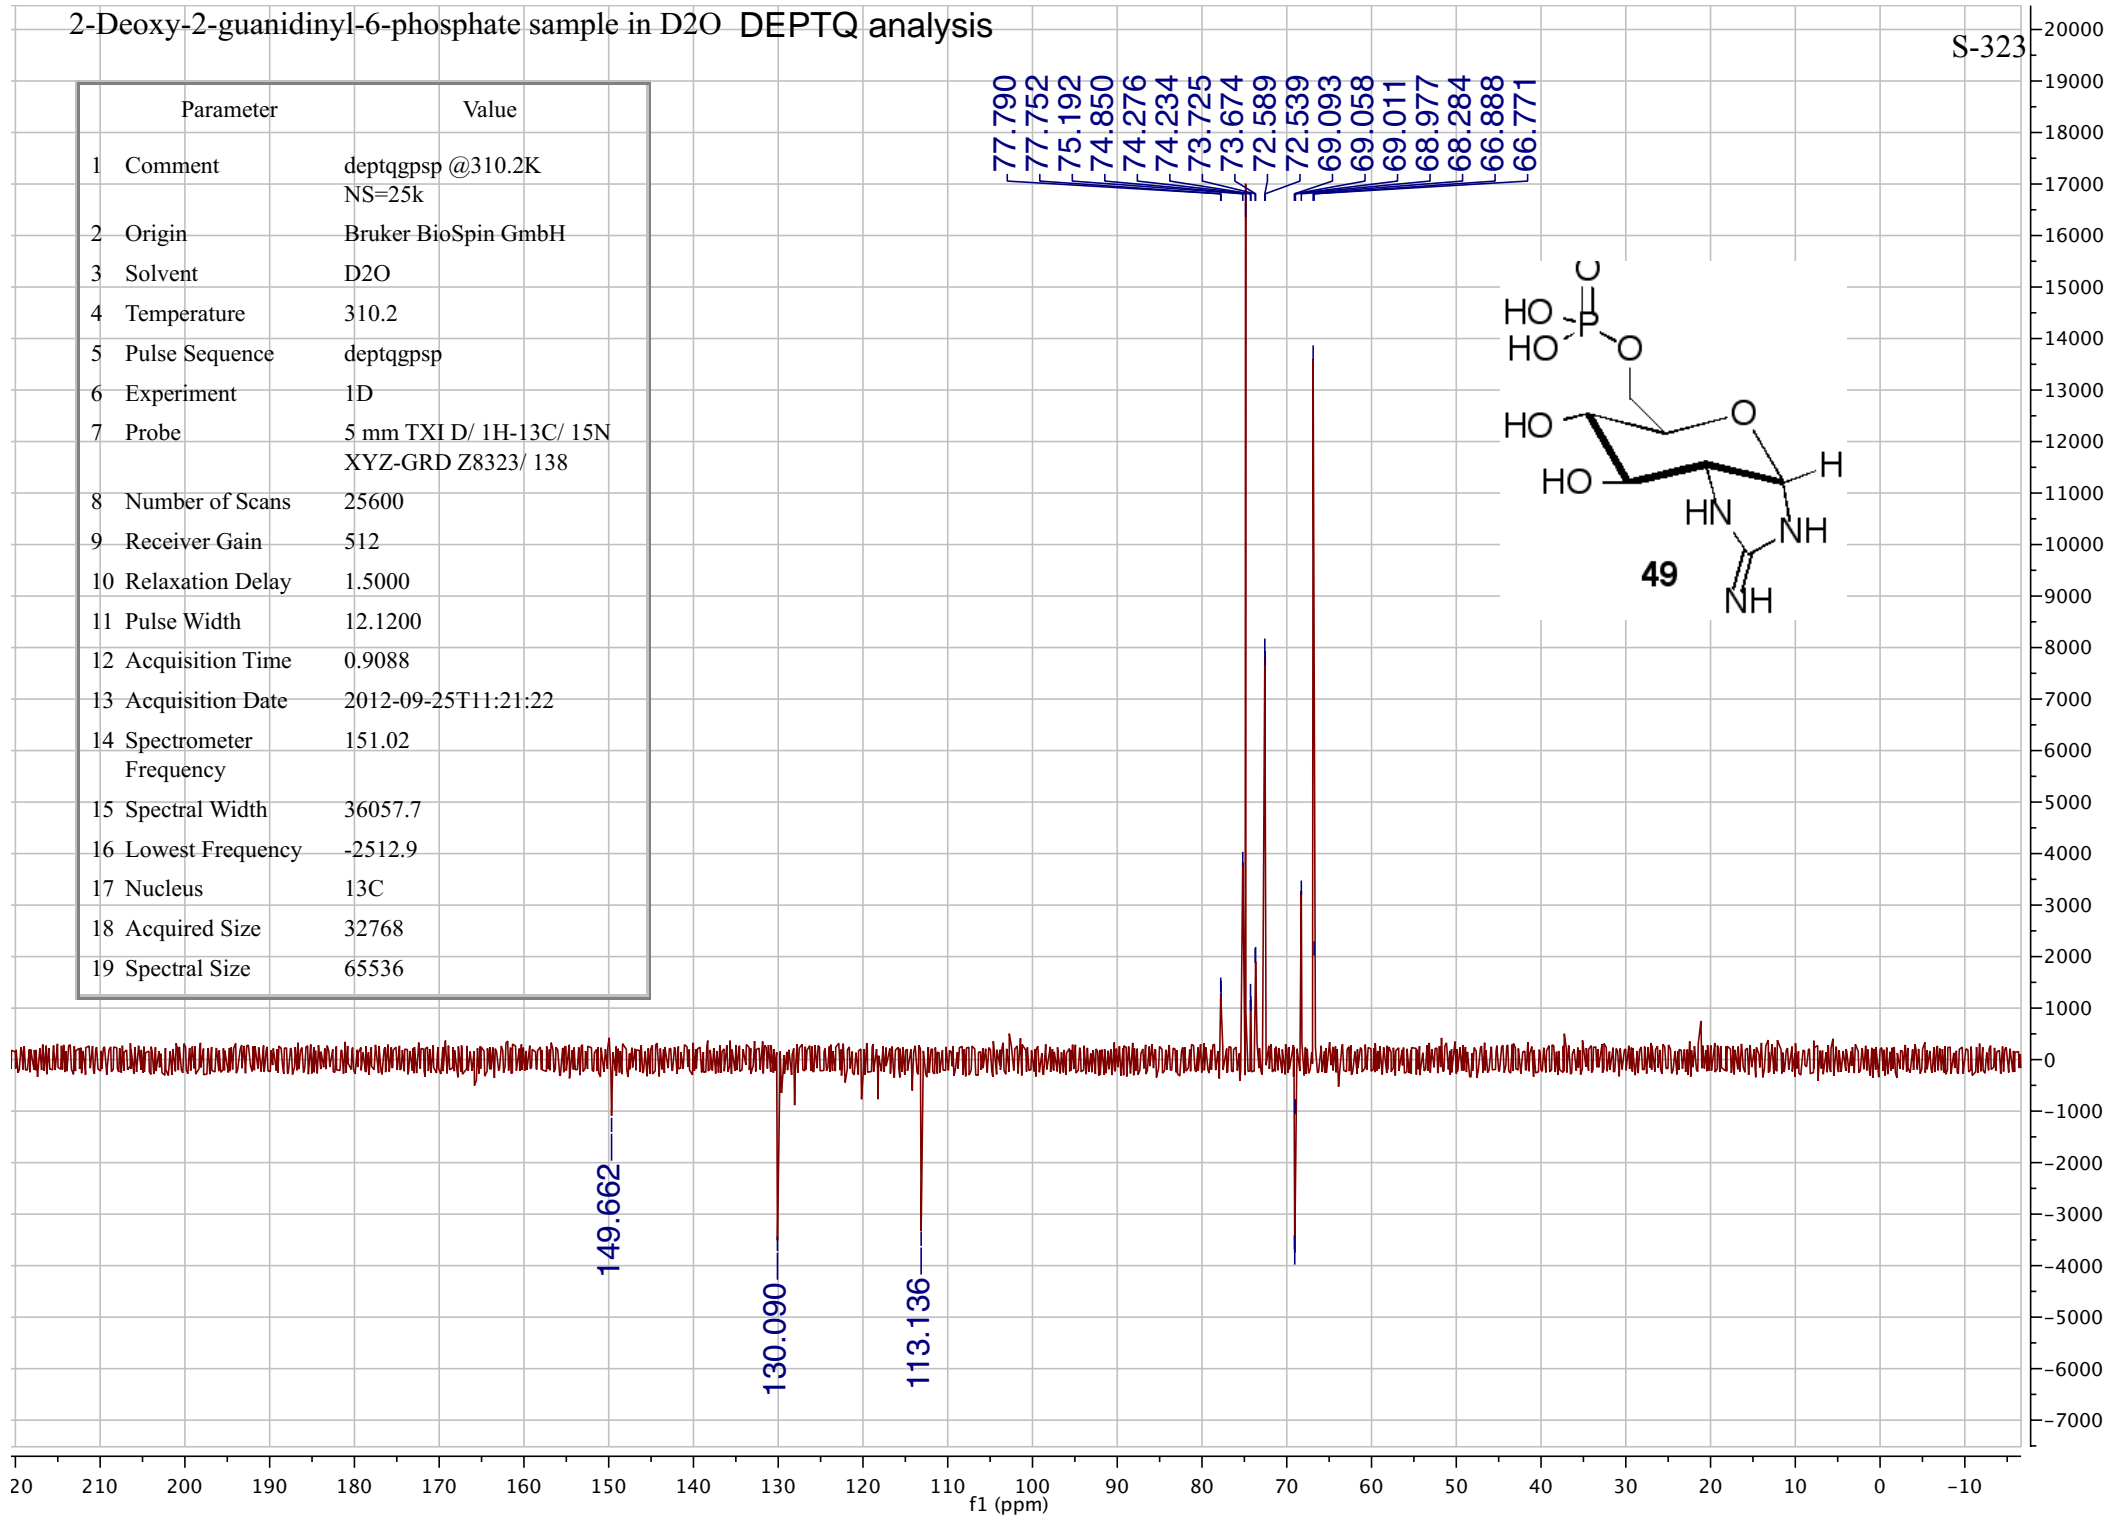

2-Deoxy-2-guanidiny-6-phosphate sample in D2O

| Parameter                    | Value                                         |
|------------------------------|-----------------------------------------------|
| 1 Comment                    | deptqgsp @310.2K<br>NS=25k                    |
| 2 Origin                     | Bruker BioSpin GmbH                           |
| 3 Solvent                    | D2O                                           |
| 4 Temperature                | 310.2                                         |
| 5 Pulse Sequence             | deptqgsp                                      |
| 6 Experiment                 | 1D                                            |
| 7 Probe                      | 5 mm TXI D/ 1H-13C/ 15N<br>XYZ-GRD Z8323/ 138 |
| 8 Number of Scans            | 25600                                         |
| 9 Receiver Gain              | 512                                           |
| 10 Relaxation Delay          | 1.5000                                        |
| 11 Pulse Width               | 12.1200                                       |
| 12 Acquisition Time          | 0.9088                                        |
| 13 Acquisition Date          | 2012-09-25T11:21:22                           |
| 14 Spectrometer<br>Frequency | 151.02                                        |
| 15 Spectral Width            | 36057.7                                       |
| 16 Lowest Frequency          | -2512.9                                       |
| 17 Nucleus                   | 13C                                           |
| 18 Acquired Size             | 32768                                         |
| 19 Spectral Size             | 65536                                         |

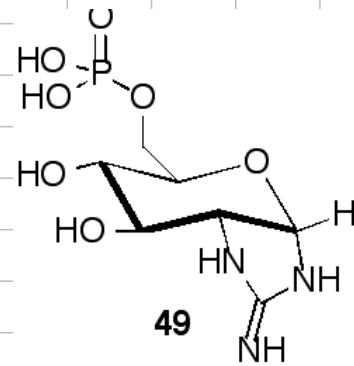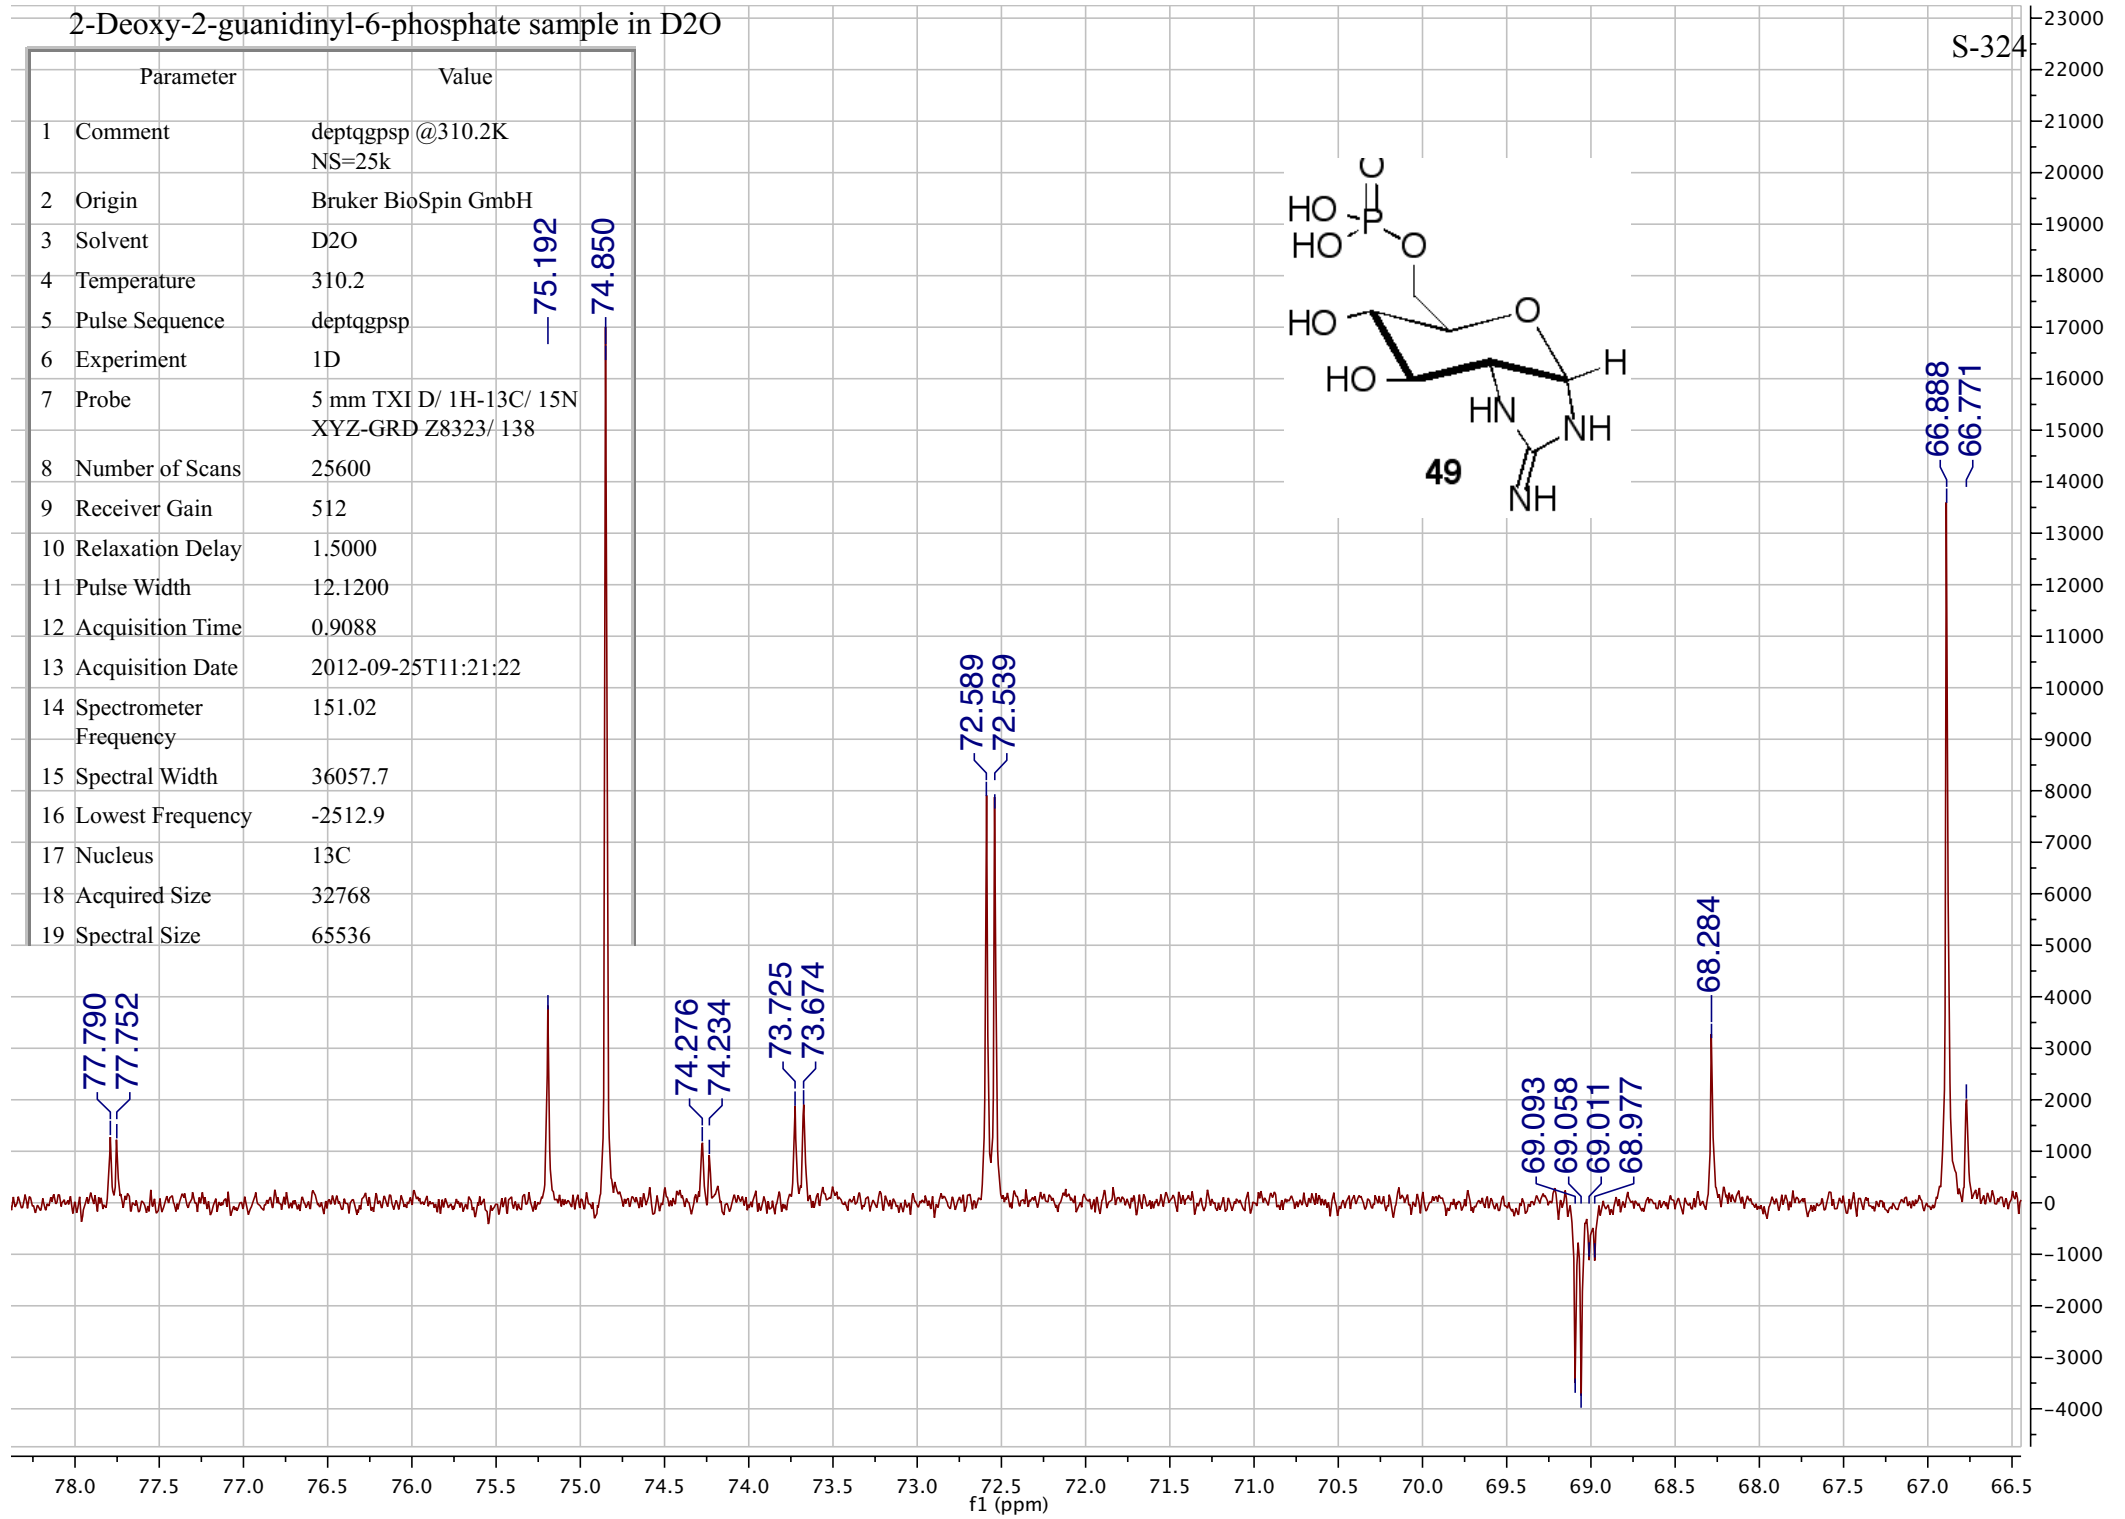

|               |                      |             |                      |                 |              |                        |                      |
|---------------|----------------------|-------------|----------------------|-----------------|--------------|------------------------|----------------------|
| Sample Name   | Jeff 52              | Position    | Vial 52              | Instrument Name | Instrument 1 | User Name              | DYL                  |
| Inj Vol       | 1                    | InjPosition |                      | SampleType      | Unknown      | IRM Calibration Status | Success              |
| Data Filename | Direct_Vial 52_Jeff. | ACQ Method  | Direct_small mol_Jef | Comment         |              | Acquired Time          | 8/17/2012 2:38:49 PM |

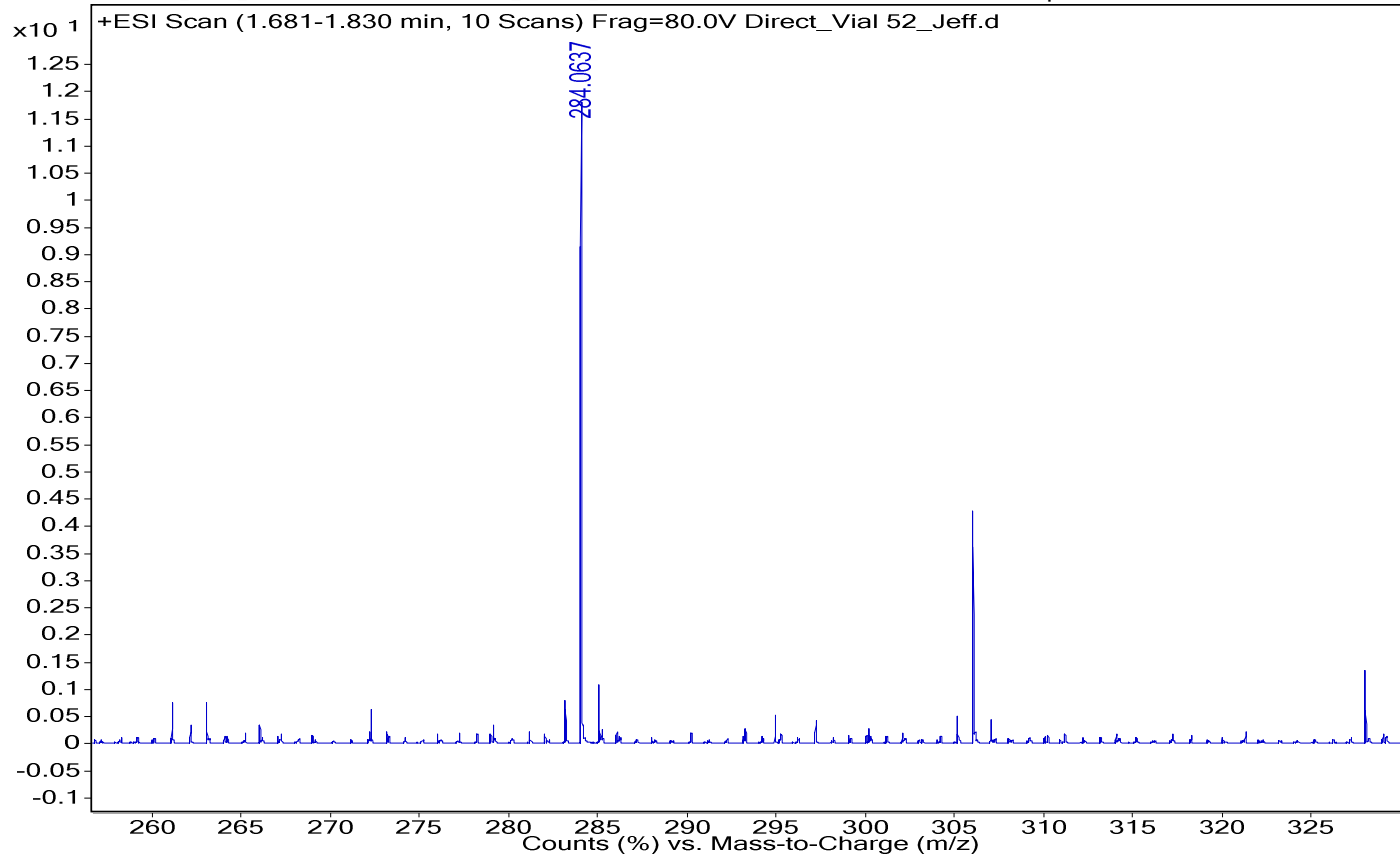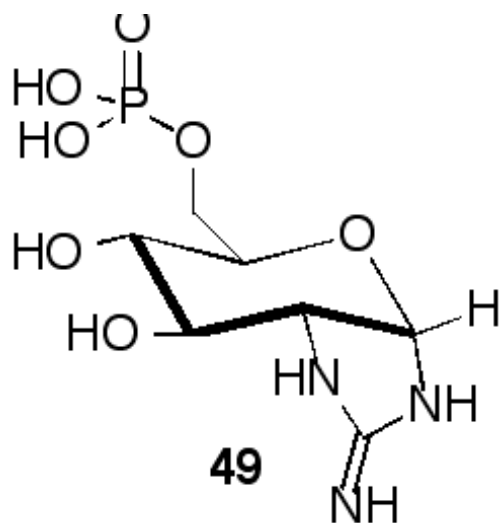

**Discussion of the NMR spectra of compound 49.** The three doublets at 5-5.1 ppm are consistent with the  $C_1H$  of **49**, based on their COSY correlations and chemical shifts. The coupling values between 2.3-4.3 Hz indicate a shallow dihedral angle with  $C_2H$ . The (-) doublets at 69-69.1 ppm in the DEPTQ spectrum match that expected for (at least two) phosphate esters at  $C_6$  with two attached protons and  $J_{C-P}$  of 5-5.3 Hz.  $^1C_5$  (single attached proton) is also expected to exhibit  $J_{C-P}$  coupling and thus the three (+) doublets at 72.6 (d,  $J=7.5$  Hz), 73.7 (d,  $J=7.6$  Hz), and 74.3 (d,  $J=7.5$  Hz) can plausibly be assigned to three distinct  $C_5$ 's. Finally, the (-) peaks at 113.1, 130.1 and 150.0 are consistent with three distinct central  $C$ 's, originating from the 'guanidine', which have no attached protons.

**Figure S1.** Proposed structures for the 3 species observed in the NMR spectra in **49**.

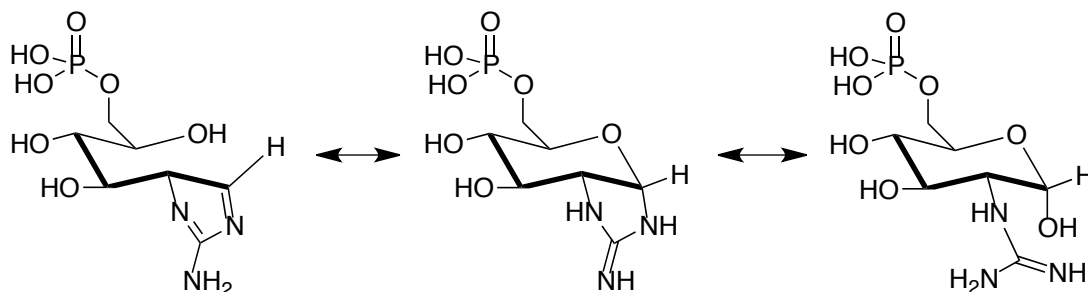

- (1) Gács-Baitz, E.; Sági, G.; Kajtár-Peredy, M. *Nucleosides, Nucleotides and Nucleic Acids* **2005**, *24*, 247-257.

**2-Amino-3-azido-2,3-dideoxyglucose-6-phosphate.** The enzymatic phosphorylation followed that described by Guo and Frost.<sup>1</sup> A solution of **25** (as the TFA salt, 10 mg, 32  $\mu\text{mol}$ ), ATP (0.1 g),  $\text{MgCl}_2 \cdot 6\text{H}_2\text{O}$  (45 mg) and citric acid  $\cdot \text{H}_2\text{O}$  (18 mg) in deionized  $\text{H}_2\text{O}$  (5 mL) was adjusted to  $\text{pH}=8.0$  with 0.5N KOH. Three additions of yeast hexokinase (100 UN each) were made; one at the start, then at 10 h and 20 h. The pH was re-adjusted to 8 with 0.1N KOH after each addition. After 36 h, the sample was lyophilized and the phosphorylated product was isolated by anion exchange chromatography using ammonium formate. Final lyophilization (2x) afforded 12 mg of a white powder, which contained 24.5 equiv of ammonium formate, based on integration of the formate C-H and the combined anomeric protons; yield of 2-Amino-3-azido-2,3-dideoxyglucose-6-phosphate was 6.6  $\mu\text{mol}$  (21%).  $^1\text{H}$  NMR ( $\text{D}_2\text{O}$ , 600 MHz)  $\delta$ : [ $\alpha$ : $\beta$  ratio = 1:0.4] 3.04 (dd,  $J=11.0, 8.4$  Hz, 0.4H,  $\text{H}\beta_2$ ), 3.36 (dd,  $J=11.1, 3.6$  Hz, 1H,  $\text{H}\alpha_2$ ), 3.75 to 3.93 (m, 2.8 H), 4.04 (dd,  $J=11.0, 9.4$  Hz, 1H,  $\text{H}\alpha_3$ ), 4.09 to 4.20 (m, 3.5 H), 5.04 (d,  $J=8.4$  Hz, 0.4H,  $\text{H}\beta_1$ ), 5.50 (d,  $J=3.6$  Hz, 1H,  $\text{H}\alpha_1$ ). The sample decomposed in solution over a period of days at room temperature and a  $^{13}\text{C}$ -NMR spectrum was not obtained. HRMS  $^m/z$   $[\text{C}_6\text{H}_{14}\text{N}_4\text{O}_7\text{P}]^+$  285.0595 = Found 285.05860

- (1) Guo, J.; Frost, J. *Journal of the American Chemical Society* **2002**, *124*, 10642-10643.

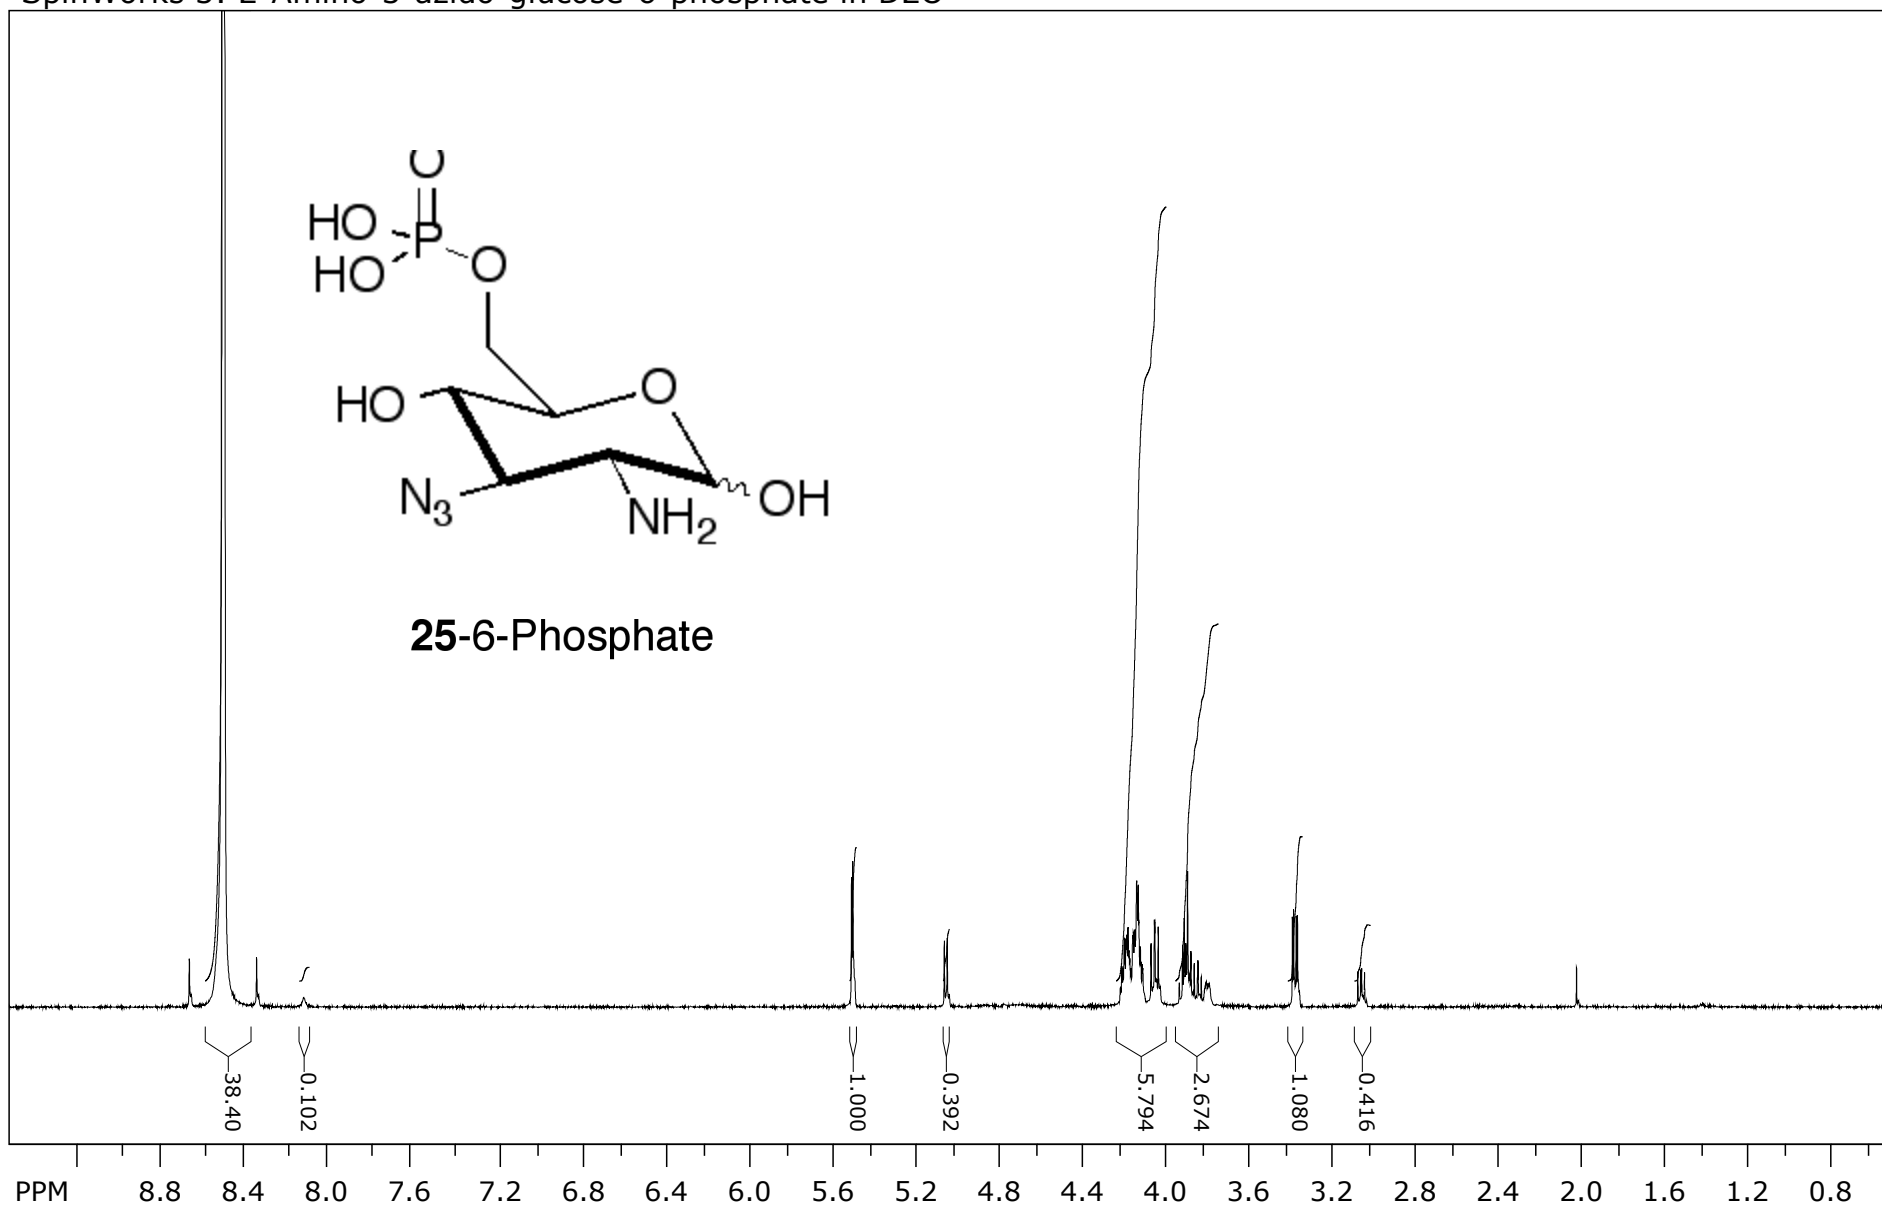

file: ...older\NMR Data\3N3GlcN6P\_D2O\2\fid expt: <zgpr>  
transmitter freq.: 600.552832 MHz  
time domain size: 65536 points  
width: 9615.38 Hz = 16.0109 ppm = 0.146719 Hz/pt  
number of scans: 32

freq. of 0 ppm: 600.549962 MHz  
processed size: 262144 complex points  
LB: 0.000 GF: 0.0000  
Hz/cm: 217.849 ppm/cm: 0.36275

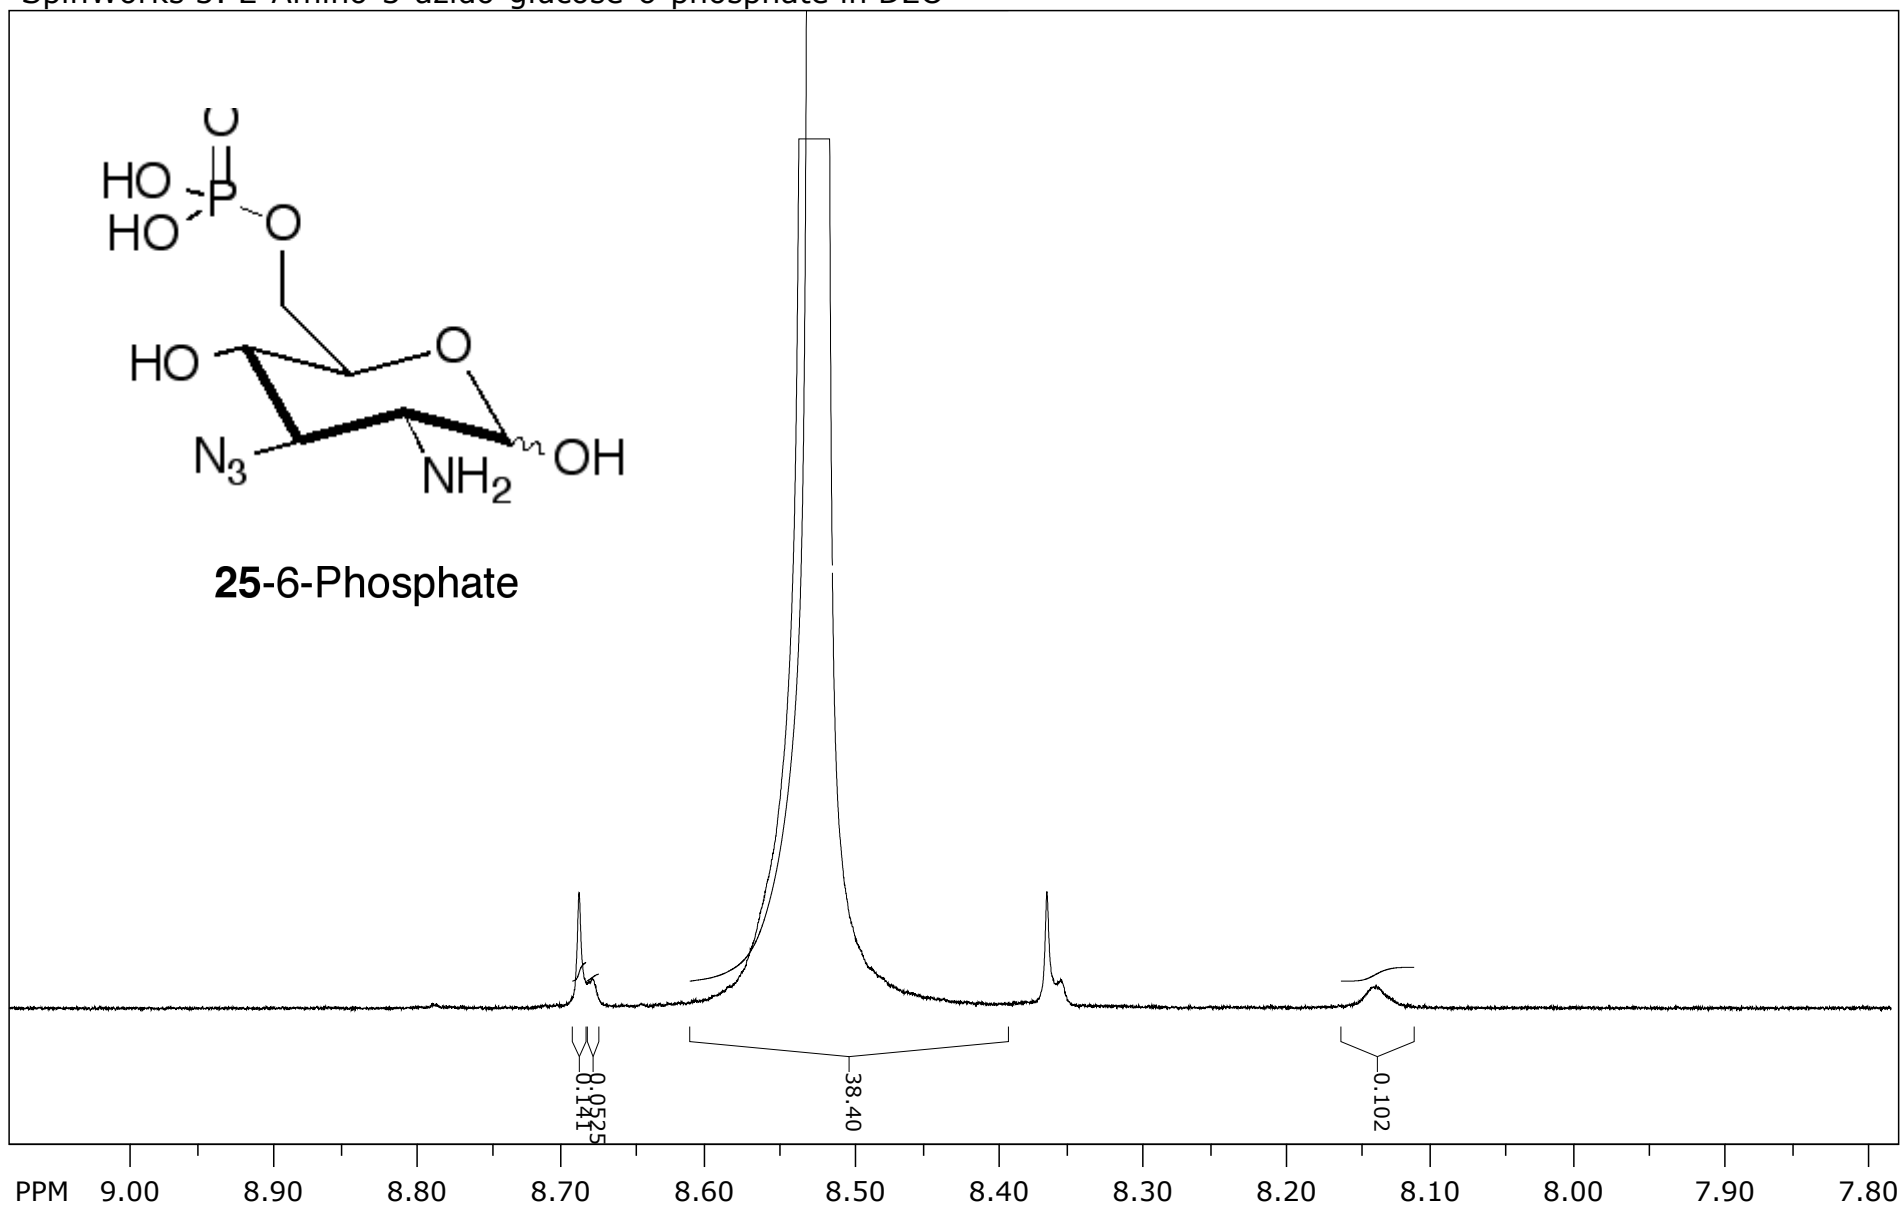

file: ...older\NMR Data\3N3GlcN6P\_D2O\2\fid expt: <zgpr>  
transmitter freq.: 600.552832 MHz  
time domain size: 65536 points  
width: 9615.38 Hz = 16.0109 ppm = 0.146719 Hz/pt  
number of scans: 32

freq. of 0 ppm: 600.549962 MHz  
processed size: 262144 complex points  
LB: 0.000 GF: 0.0000  
Hz/cm: 31.336 ppm/cm: 0.05218

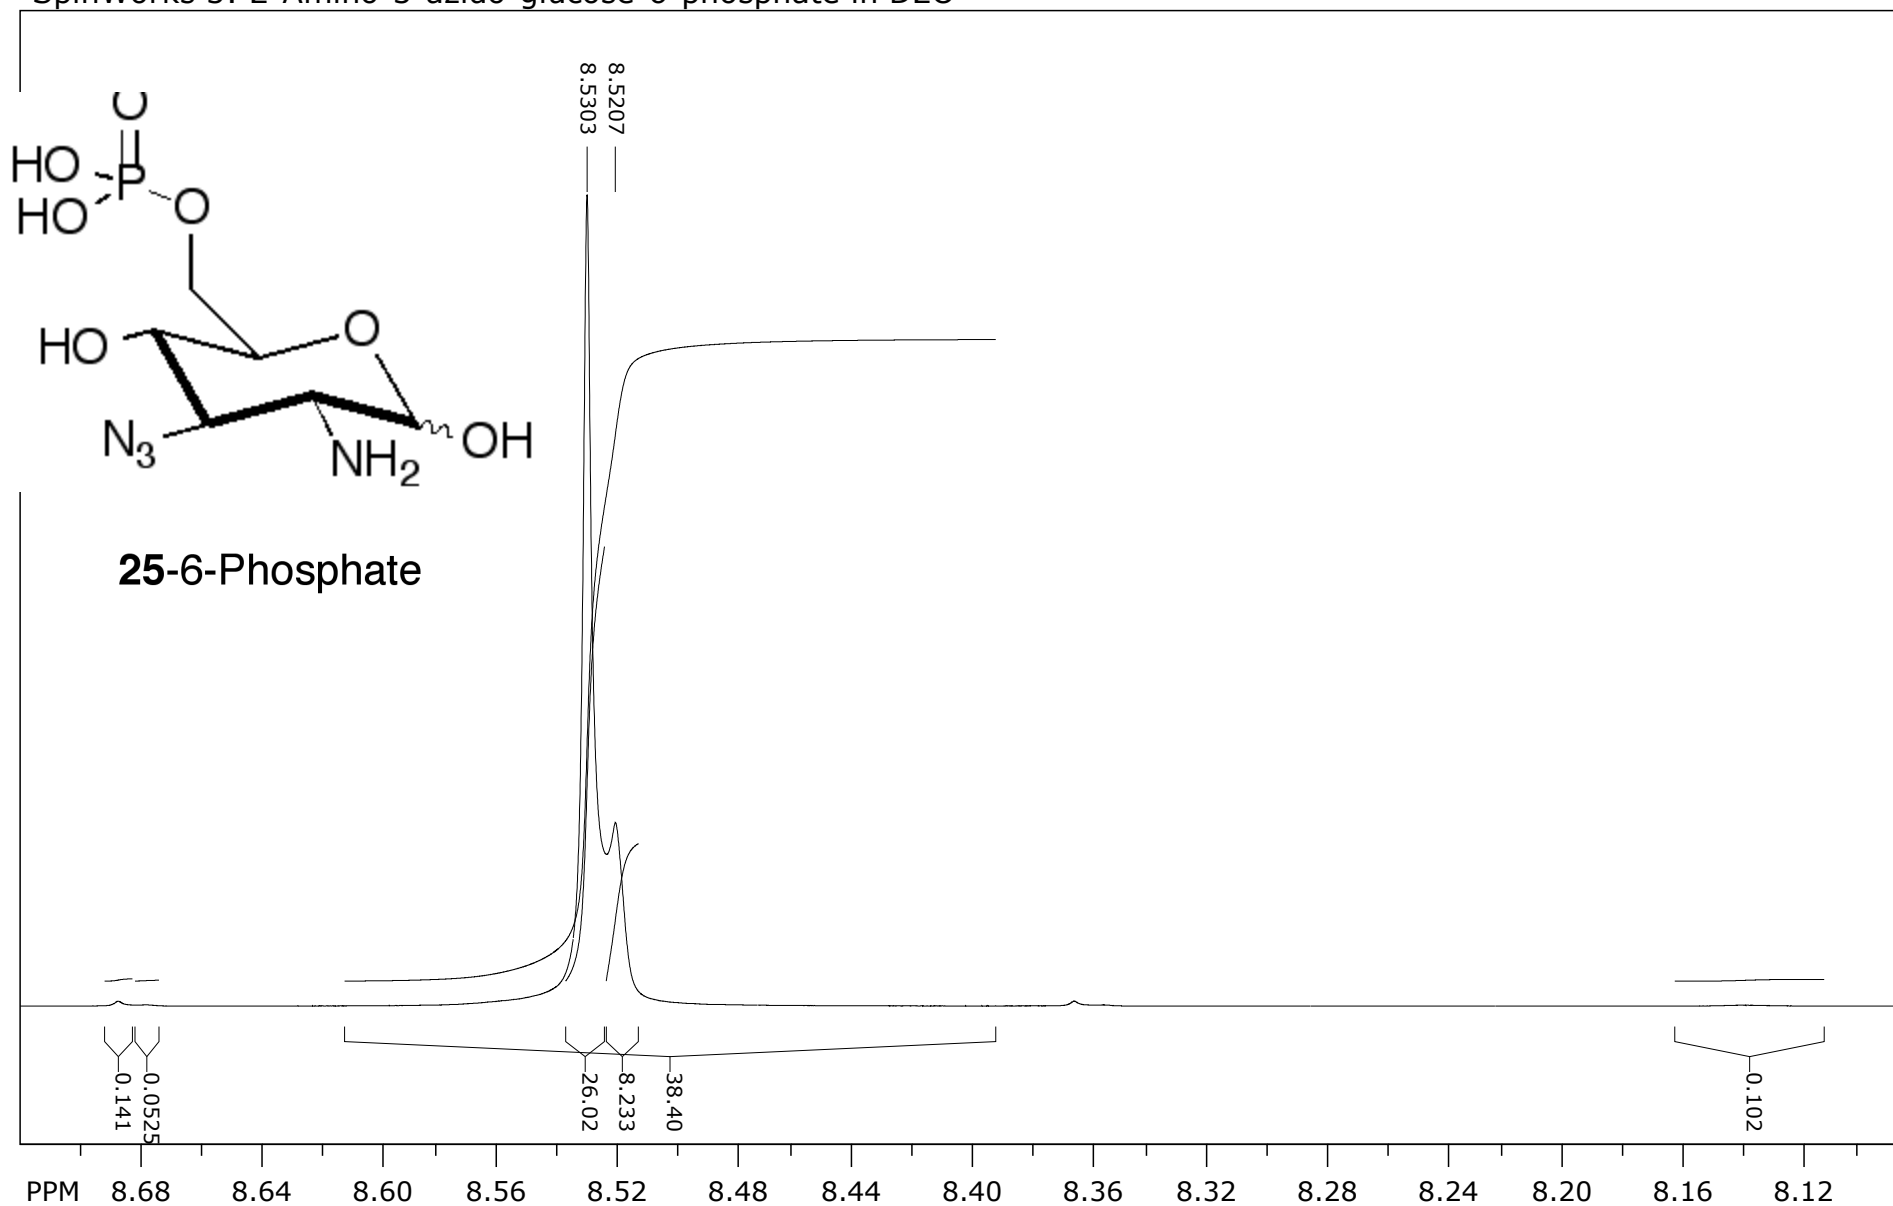

file: ...older\NMR Data\3N3GlcN6P\_D2O\2\fid expt: <zgpr>  
transmitter freq.: 600.552832 MHz  
time domain size: 65536 points  
width: 9615.38 Hz = 16.0109 ppm = 0.146719 Hz/pt  
number of scans: 32

freq. of 0 ppm: 600.549962 MHz  
processed size: 262144 complex points  
LB: 0.000 GF: 0.0000  
Hz/cm: 15.336 ppm/cm: 0.02554



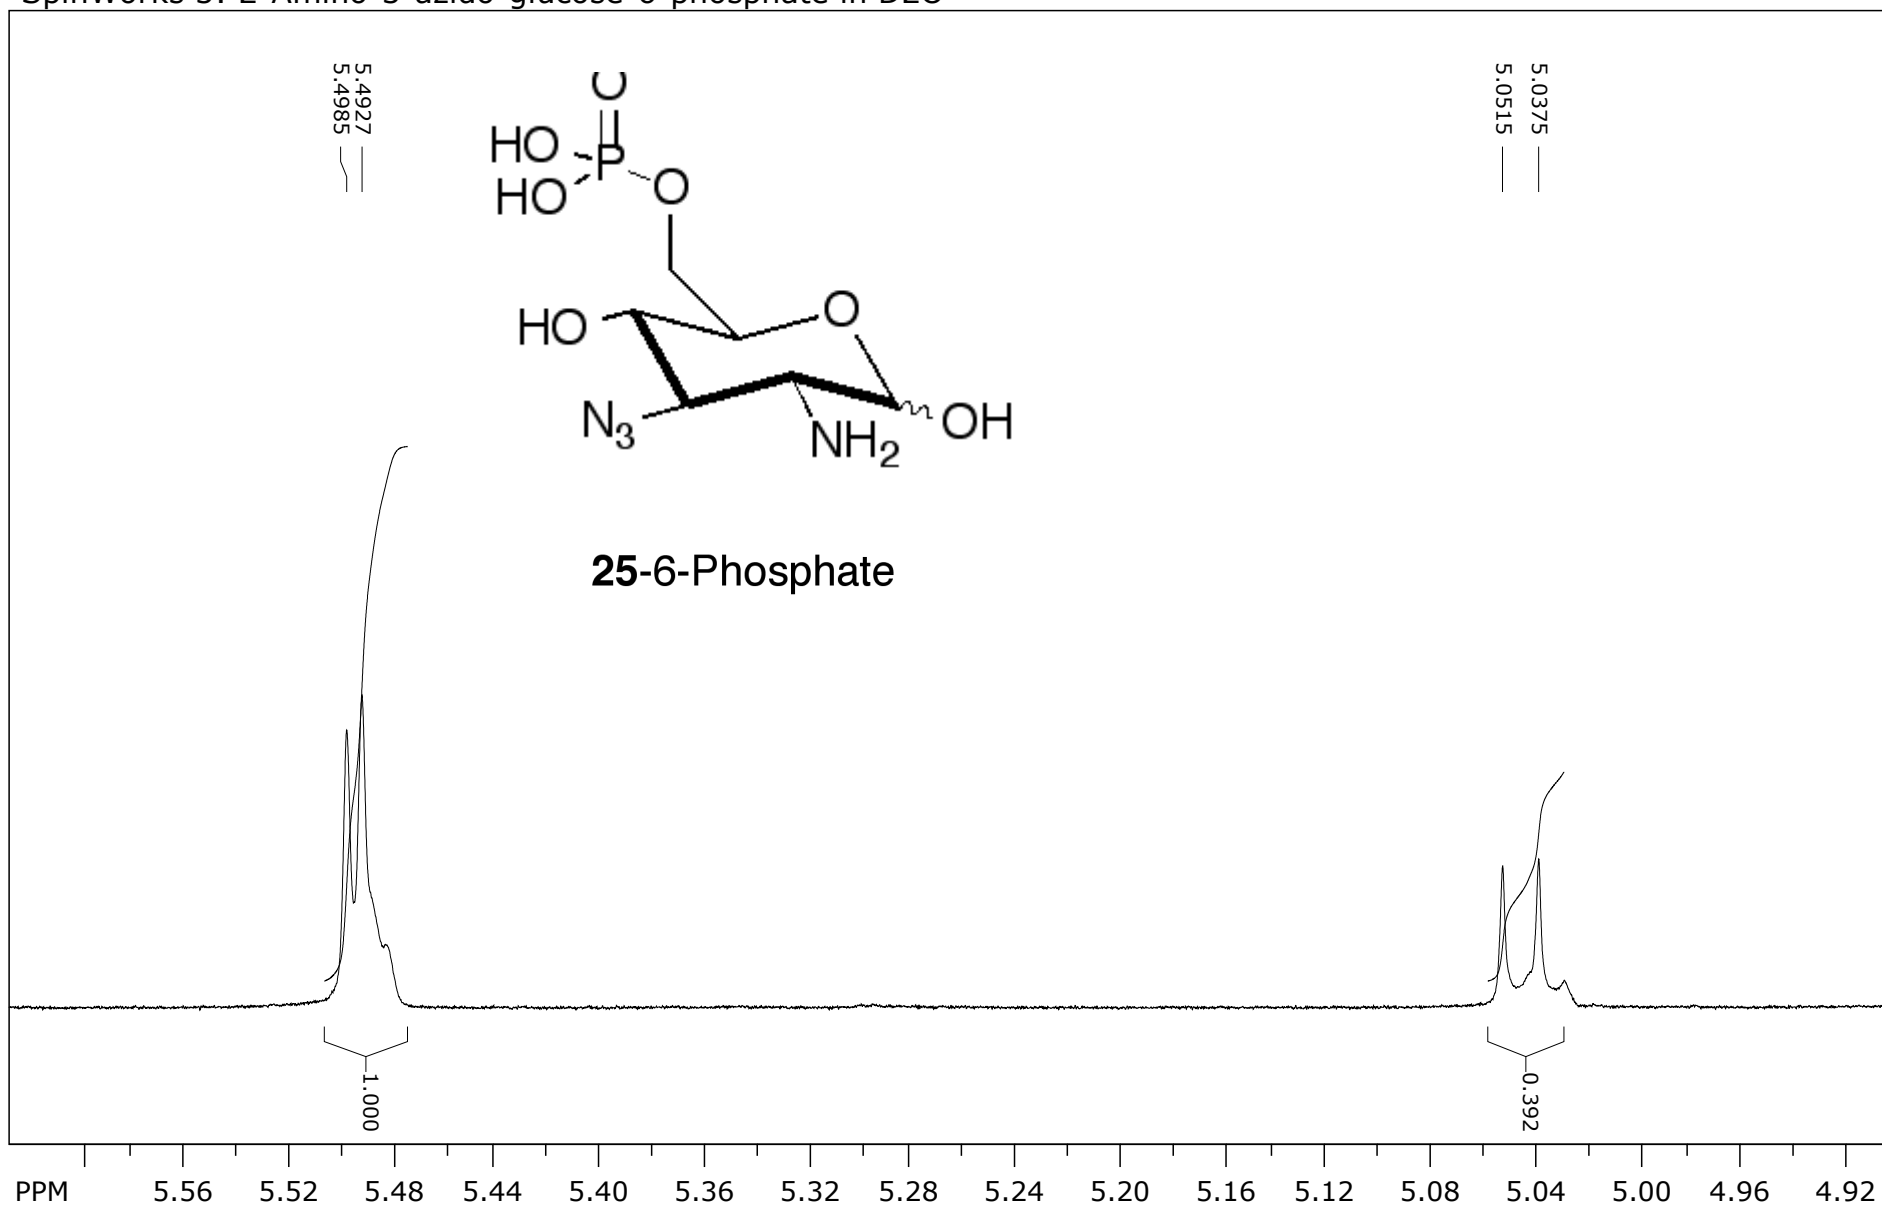

file: ...older\NMR Data\3N3GlcN6P\_D2O\2\fid expt: <zgpr>  
transmitter freq.: 600.552832 MHz  
time domain size: 65536 points  
width: 9615.38 Hz = 16.0109 ppm = 0.146719 Hz/pt  
number of scans: 32

freq. of 0 ppm: 600.549962 MHz  
processed size: 262144 complex points  
LB: 0.000 GF: 0.0000  
Hz/cm: 17.488 ppm/cm: 0.02912

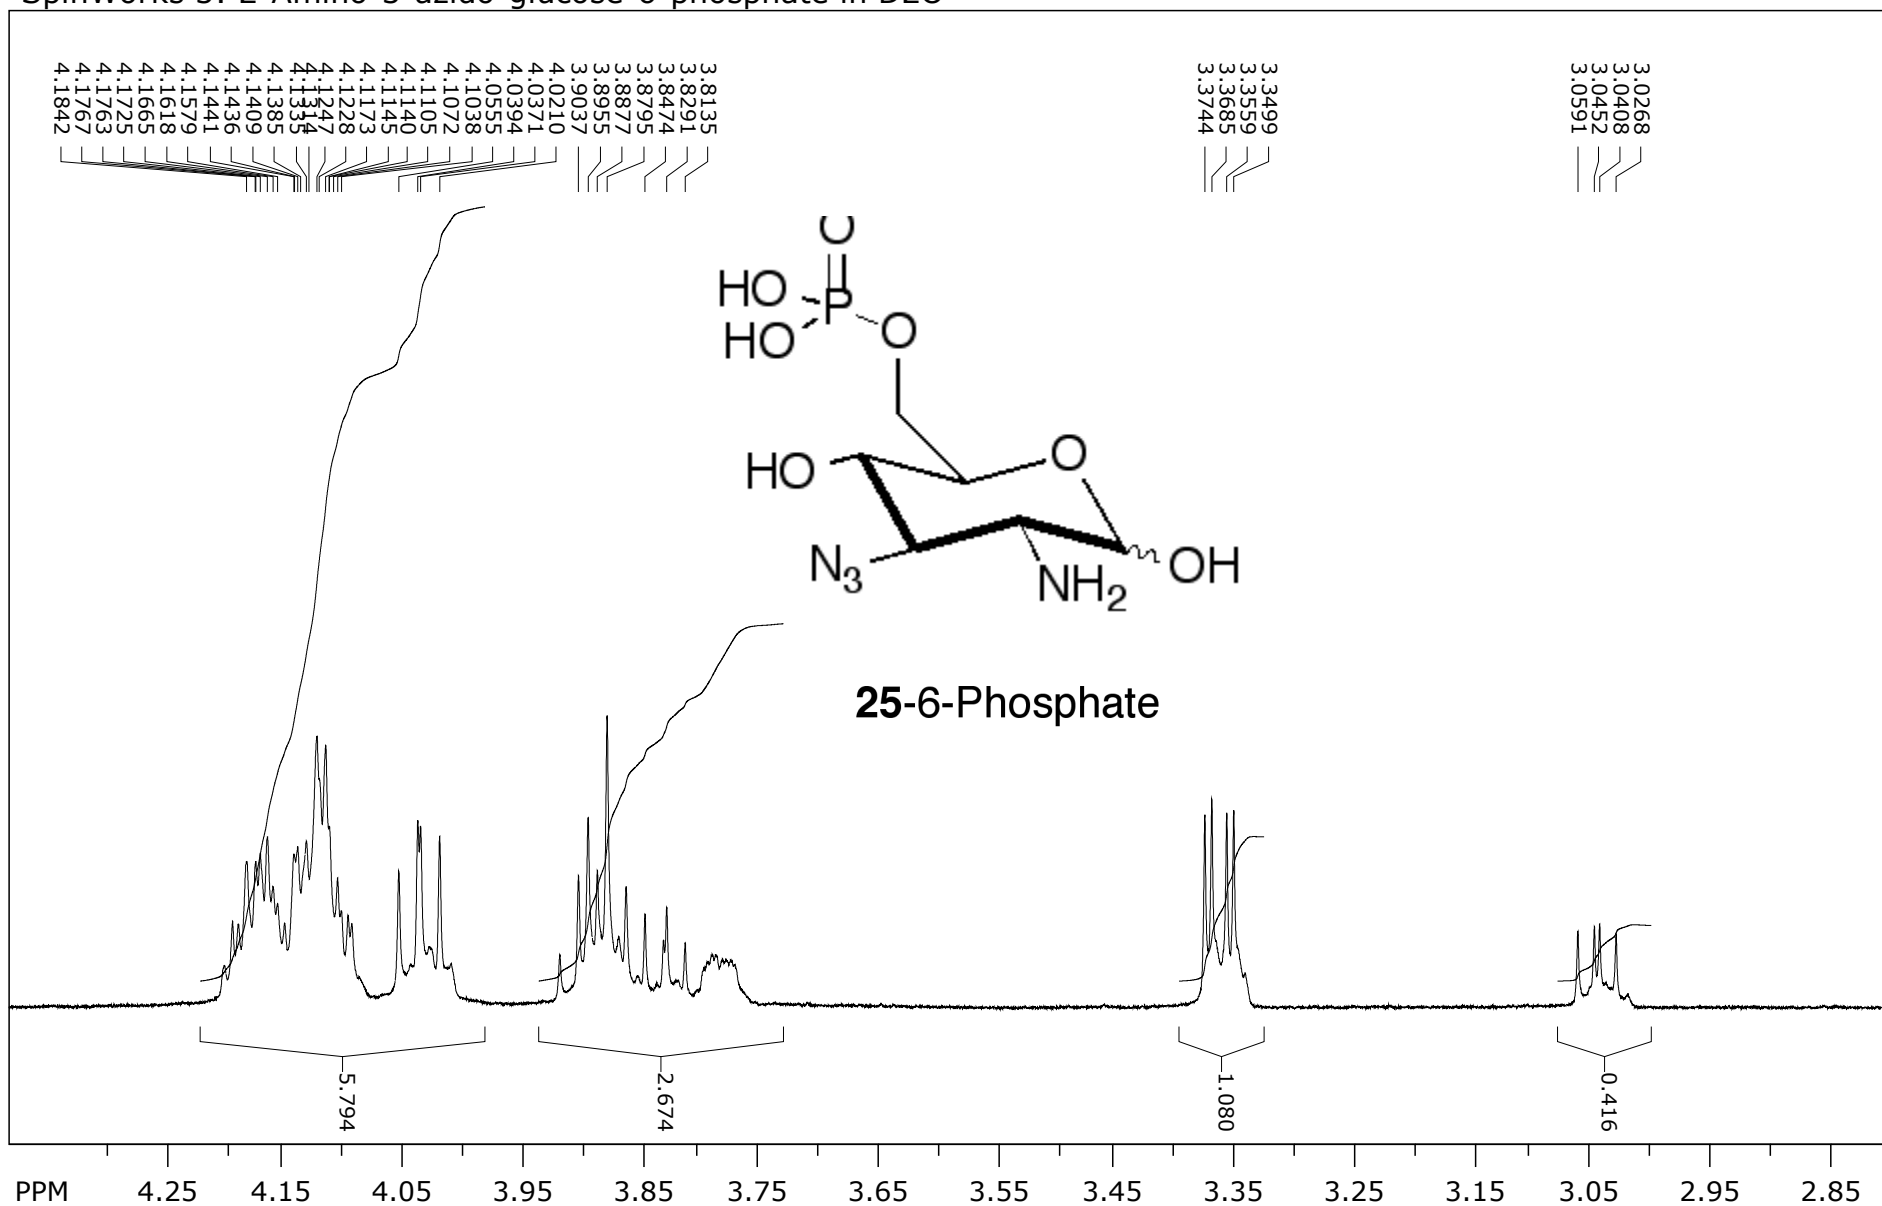

file: ...older\NMR Data\3N3GlcN6P\_D2O\2\fid expt: <zgpr>  
 transmitter freq.: 600.552832 MHz  
 time domain size: 65536 points  
 width: 9615.38 Hz = 16.0109 ppm = 0.146719 Hz/pt  
 number of scans: 32

freq. of 0 ppm: 600.549962 MHz  
 processed size: 262144 complex points  
 LB: 0.000 GF: 0.0000  
 Hz/cm: 38.204 ppm/cm: 0.06361

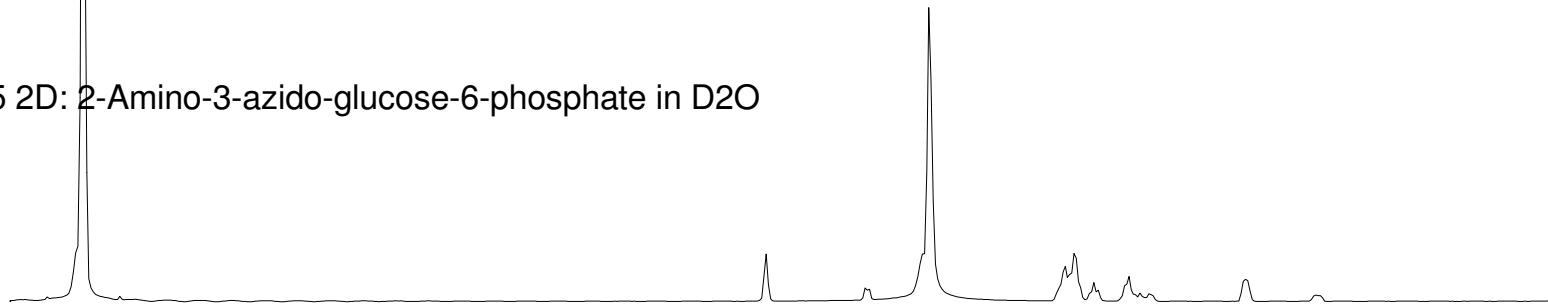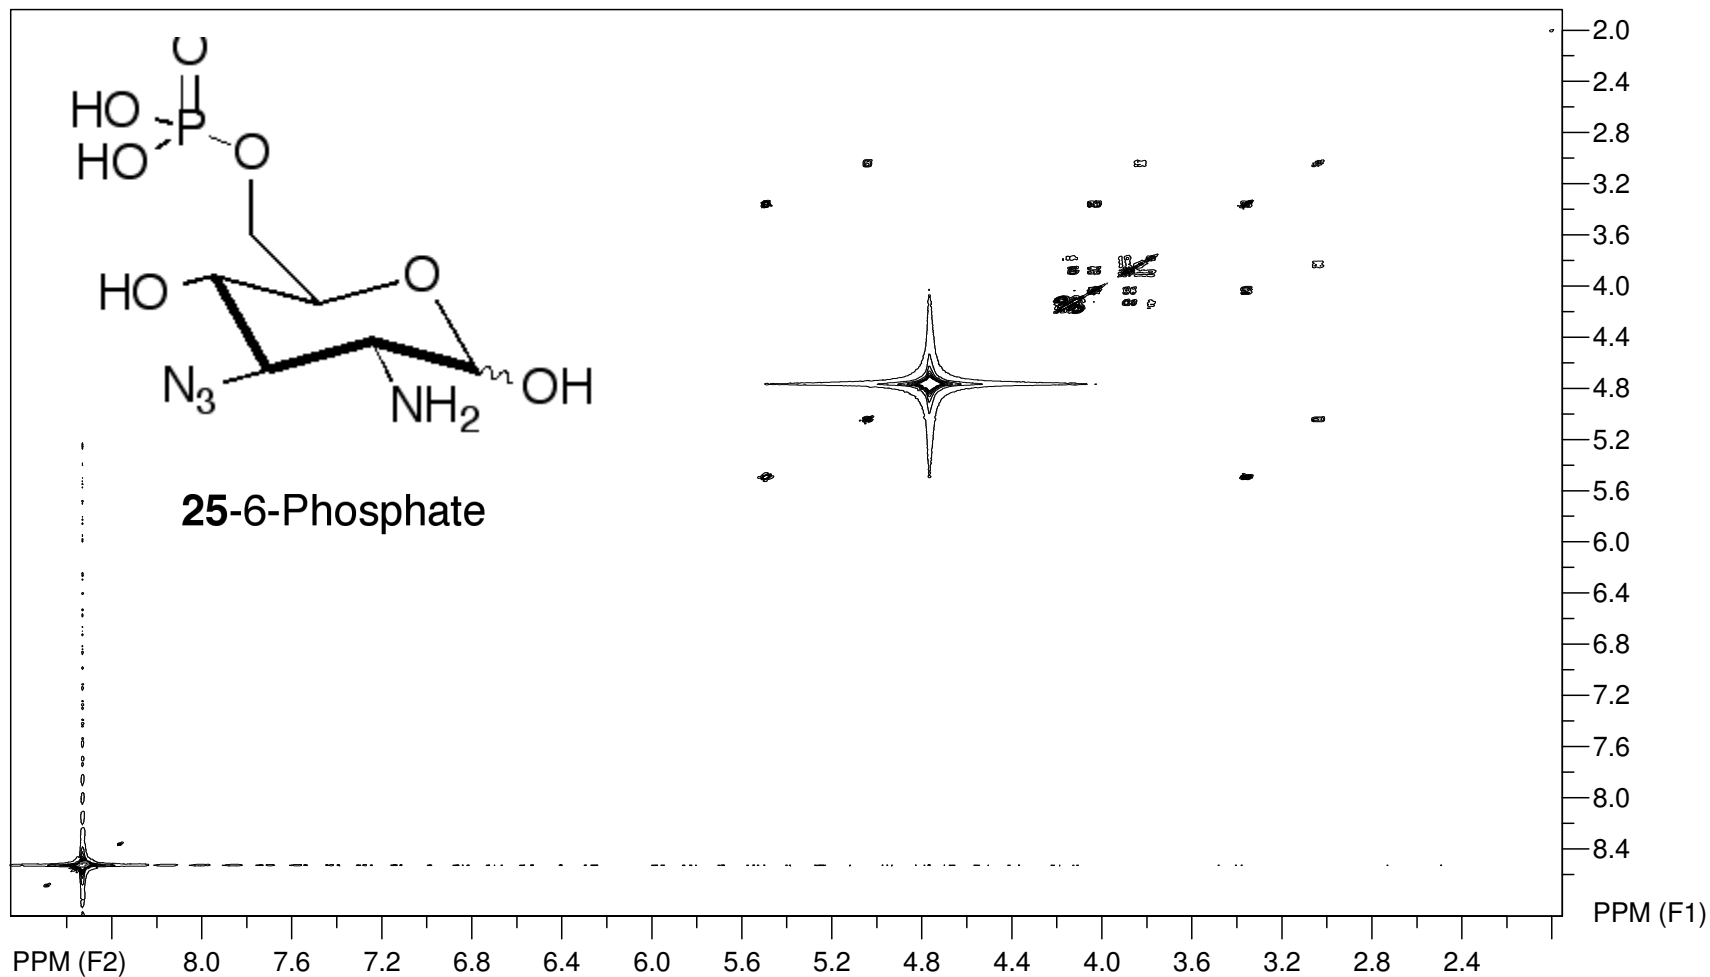

file: C:\Users\Jeff\Documents\NMR Folder\NMR Data\3N3GlcN6P\_COSY\2\ser exp: <cosygpqf>  
 transmitter freq.: 600.553566 MHz  
 time domain size: 2048 by 2048 points  
 width (F2): 6009.58 Hz = 10.006793 ppm = 2.934365 Hz/pt  
 number of scans: 1

F2: freq. of 0 ppm: 600.549962 MHz  
 processed size: 1024 complex points  
 window function: Sine  
 shift: 0.0 degrees  
 Hz/cm: 202.015 ppm/cm: 0.33638

F1: freq. of 0 ppm: 600.549962 MHz  
 processed size: 1024 complex points  
 window function: Sine  
 shift: 0.0 degrees  
 Hz/cm: 354.757 ppm/cm: 0.59072

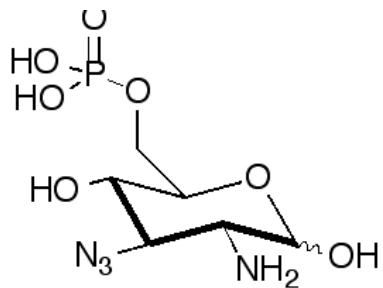

## 25-6-Phosphate

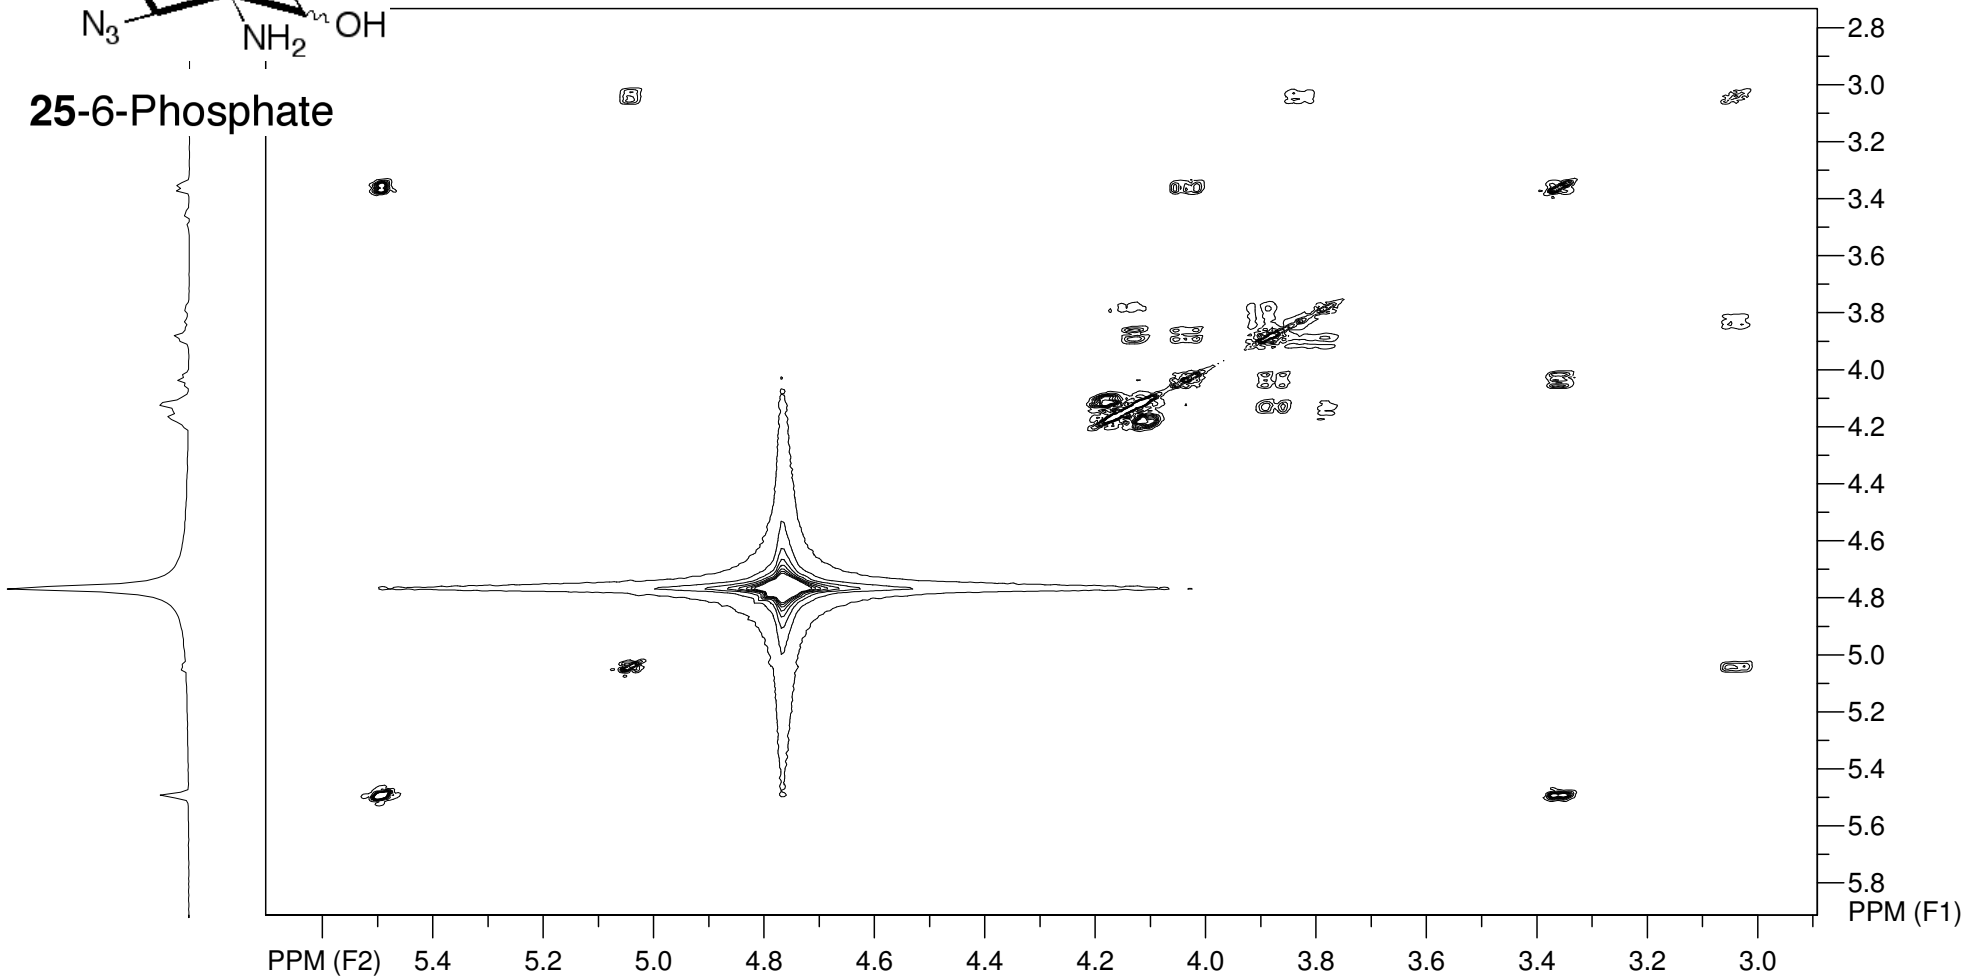

file: C:\Users\Jeff\Documents\NMR Folder\NMR Data\3N3GlcN6P\_COSY\2\ser exp: <cosygpqf>  
 transmitter freq.: 600.553566 MHz  
 time domain size: 2048 by 2048 points  
 width (F2): 6009.58 Hz = 10.006793 ppm = 2.934365 Hz/pt  
 number of scans: 1

F2: freq. of 0 ppm: 600.549962 MHz  
 processed size: 1024 complex points  
 window function: Sine  
 shift: 0.0 degrees  
 Hz/cm: 82.344 ppm/cm: 0.13711

F1: freq. of 0 ppm: 600.549962 MHz  
 processed size: 1024 complex points  
 window function: Sine  
 shift: 0.0 degrees  
 Hz/cm: 159.188 ppm/cm: 0.26507

| Sample Name   | Jeff_isolHK   | Position    | Vial 1               | Instrument Name | Instrument 1 | User Name              | DYL                |
|---------------|---------------|-------------|----------------------|-----------------|--------------|------------------------|--------------------|
| Inj Vol       | 1             | InjPosition |                      | SampleType      | Unknown      | IRM Calibration Status | S-335 Success      |
| Data Filename | AECisoprod2.d | ACQ Method  | Direct_small mol_Jef | Comment         |              | Acquired Time          | 1/6/2013 2:53:00 P |

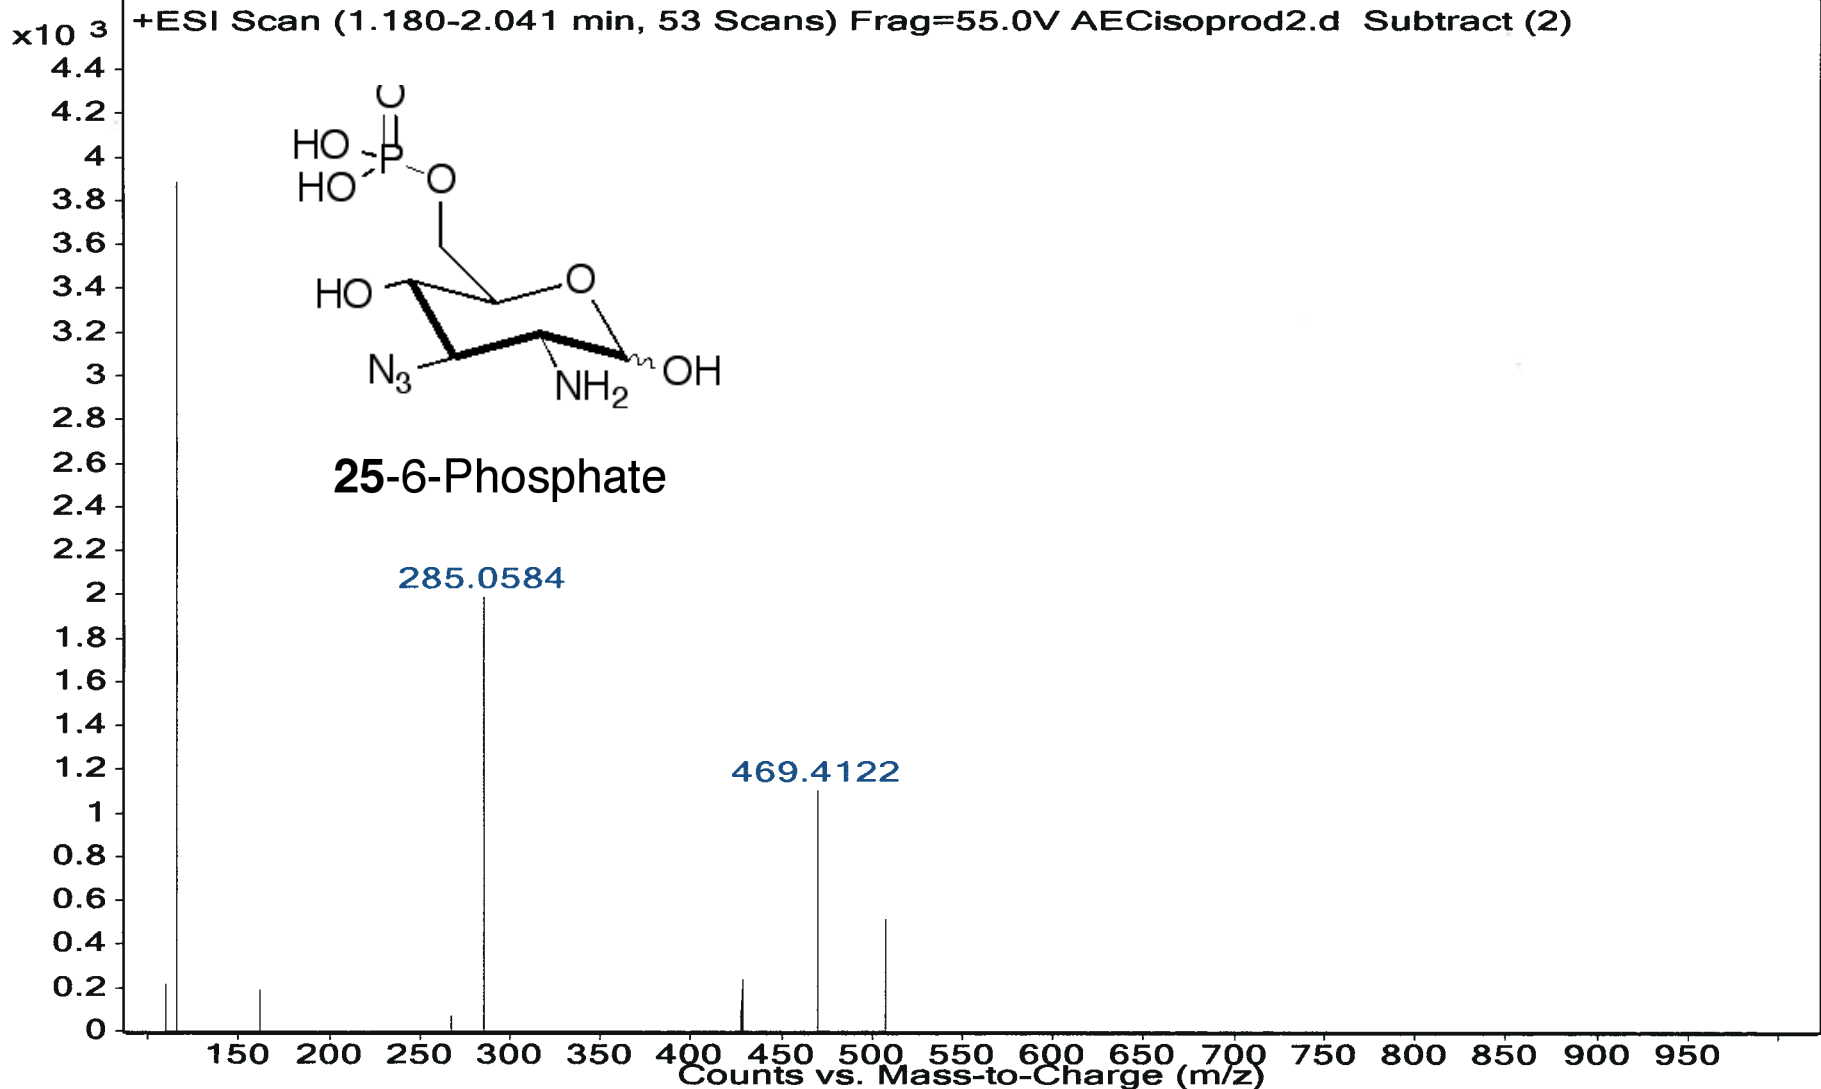

Supplement: NIHMS474402-supplement-1_si_001.pdf [file NIHMS474402-supplement-1_si_001.pdf]
